# Supplementary material for: Identification of a primitive intestinal transcription factor network shared between esophageal adenocarcinoma and its precancerous precursor state
Source: PubMed Central journal article supplement (PMC6499311; doi:10.1101/gr.243345.118), 2019-05
Supplement: supp_gr.243345.118_Supplemental_Figures_Tables.pdf [file supp_gr.243345.118_Supplemental_Figures_Tables.pdf]

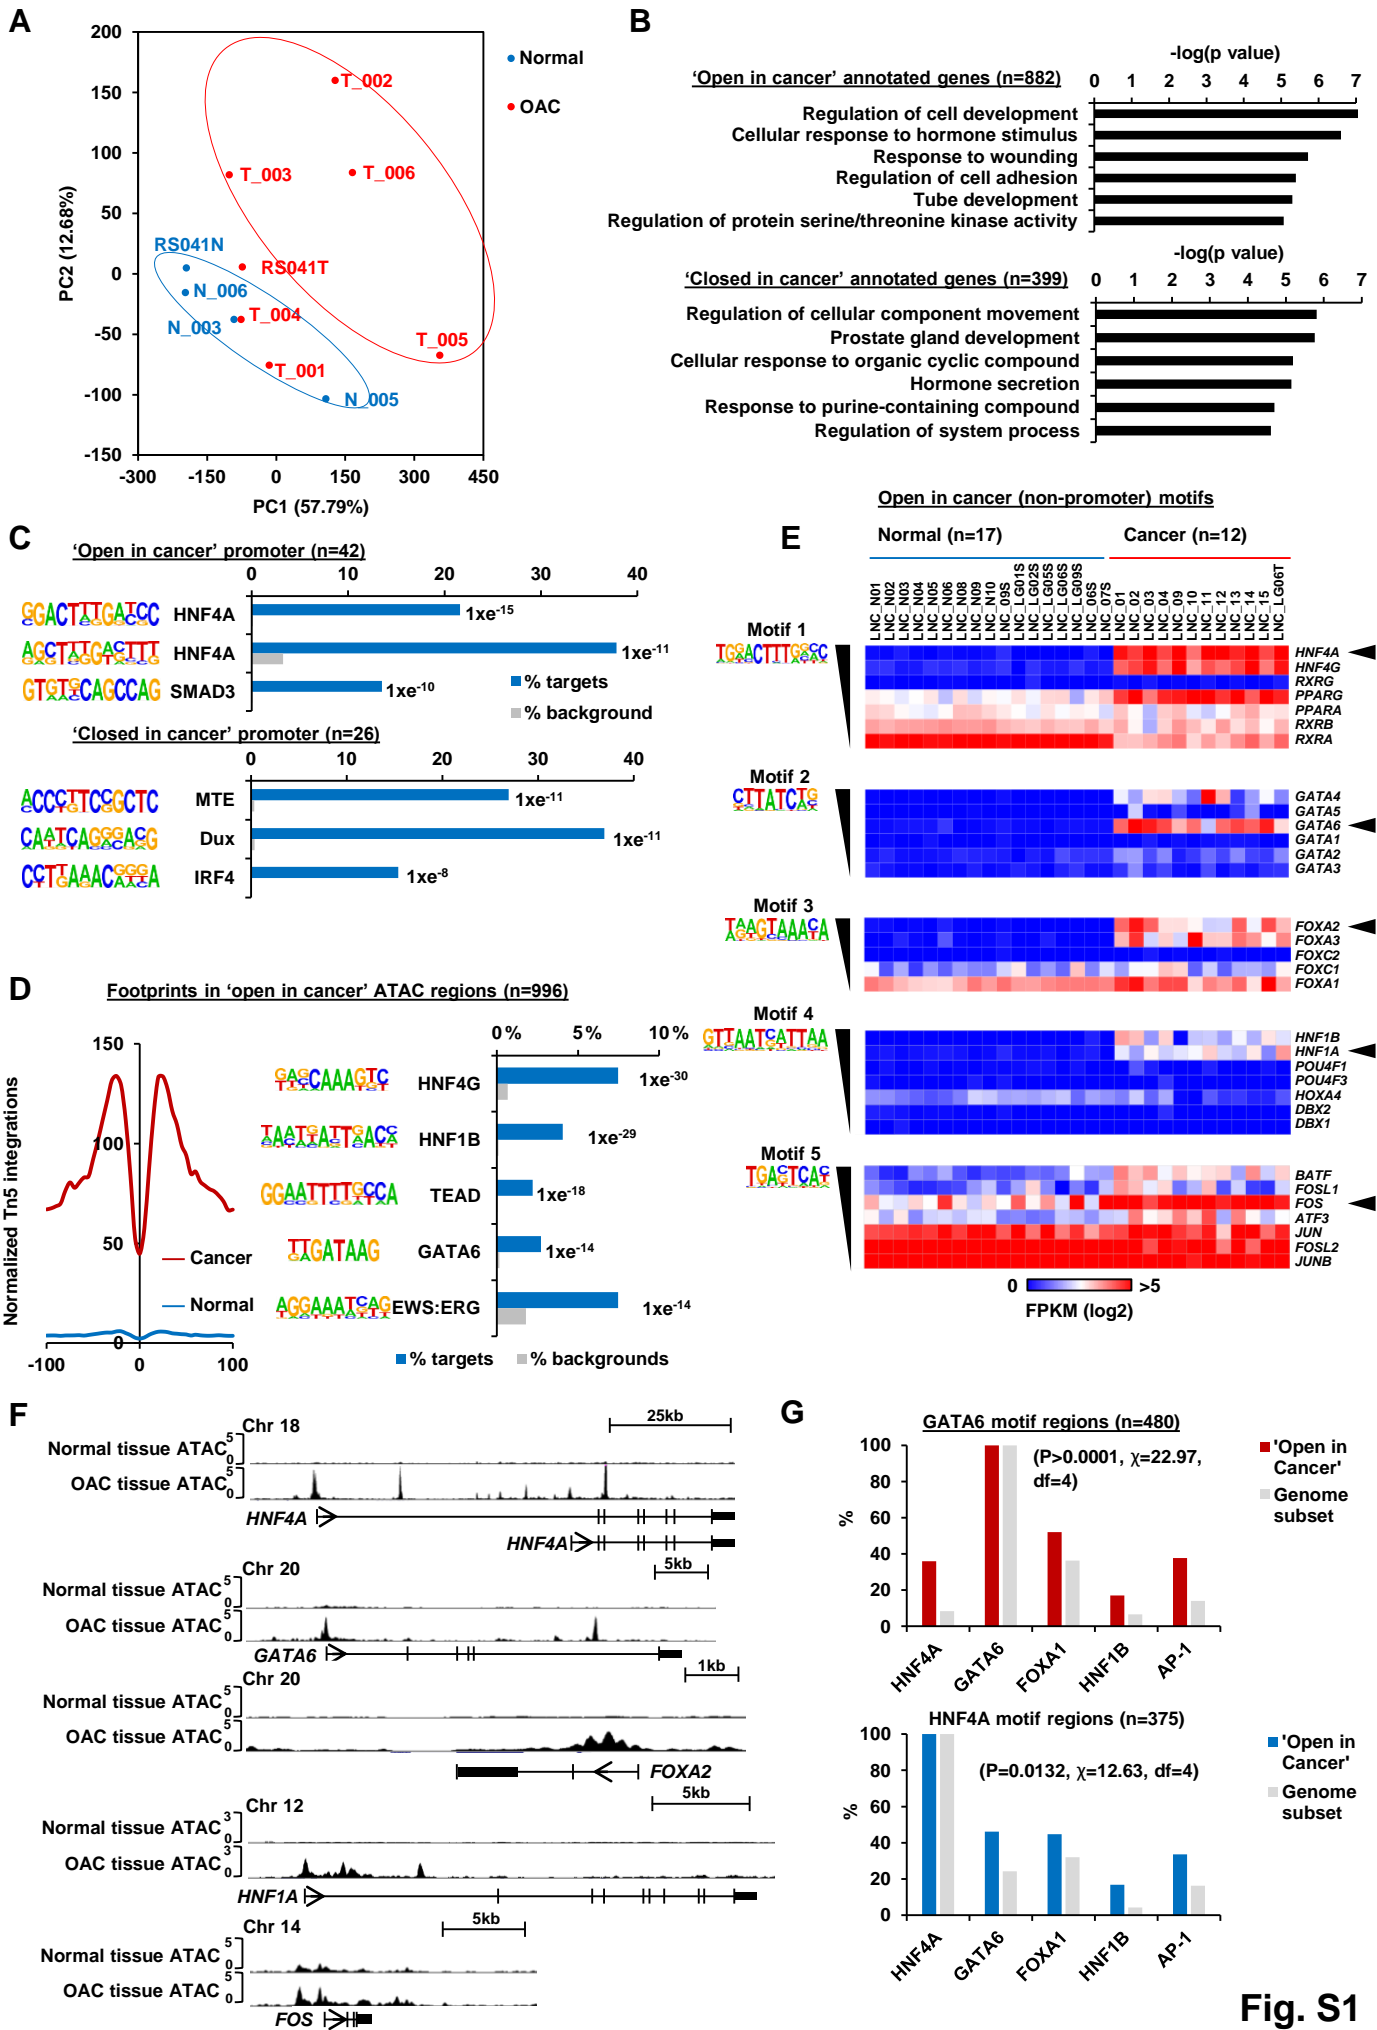

**Fig. S1**

**Figure S1. Open chromatin profiling of OAC tissue samples.** (A) PCA plot of normalised ATAC-seq signal from the top 50,000 regions of 4 normal tissue (blue) and 7 tumour tissue (red). (B) Top three motifs and their matched transcription factor from *de novo* motif discovery of 'open in cancer' and 'closed in cancer' promoter regions. The frequency of motif occurrence is shown and motifs are sorted by p-value. (C) GO term analysis of genes associated with 'open in cancer' and 'closed in cancer' differentially accessible regions. (D) Normalised Tn5 integrations from normal (blue) and cancer (red) tissue around called footprints (using pyDNase; Piper et al., 2013) within regions that are differentially accessible and 'open in cancer' (left). The top five *de novo* motifs identified within these footprint containing open regions, is shown as frequency of occurrence and sorted by p-value (right). (E) Heatmaps of  $\log_2(1+FPKM)$  values of transcription factors with enriched DNA binding motifs (shown on the left) in 'open in cancer' regions in RNAseq data from normal or OAC tissue (Maag et al., 2017). Hierarchical clustering of samples was performed using 1-Pearson's correlation and rows sorted by average fold change in cancer (depicted by triangle). Arrows indicate the highest expressed factor in OAC. (F) UCSC genome browser tracks of *HNF4A*, *GATA6*, *FOXA2*, *HNF1A* and *FOS* showing ATAC-seq signal from normal and OAC tissue. (G) Bar chart of the percentage of 'Open in Cancer' regions that contain either a GATA6 (top) or HNF4A (bottom) motif and additionally contain a motif for either HNF4A, GATA6, FOXA1, HNF1B or AP-1. A random selection of HNF4A and GATA6 motifs in the genome were also assessed for presence of HNF4A, GATA6, FOXA1, HNF1B or AP-1 motifs. P-values,  $\chi$  value and df are shown for each chart.

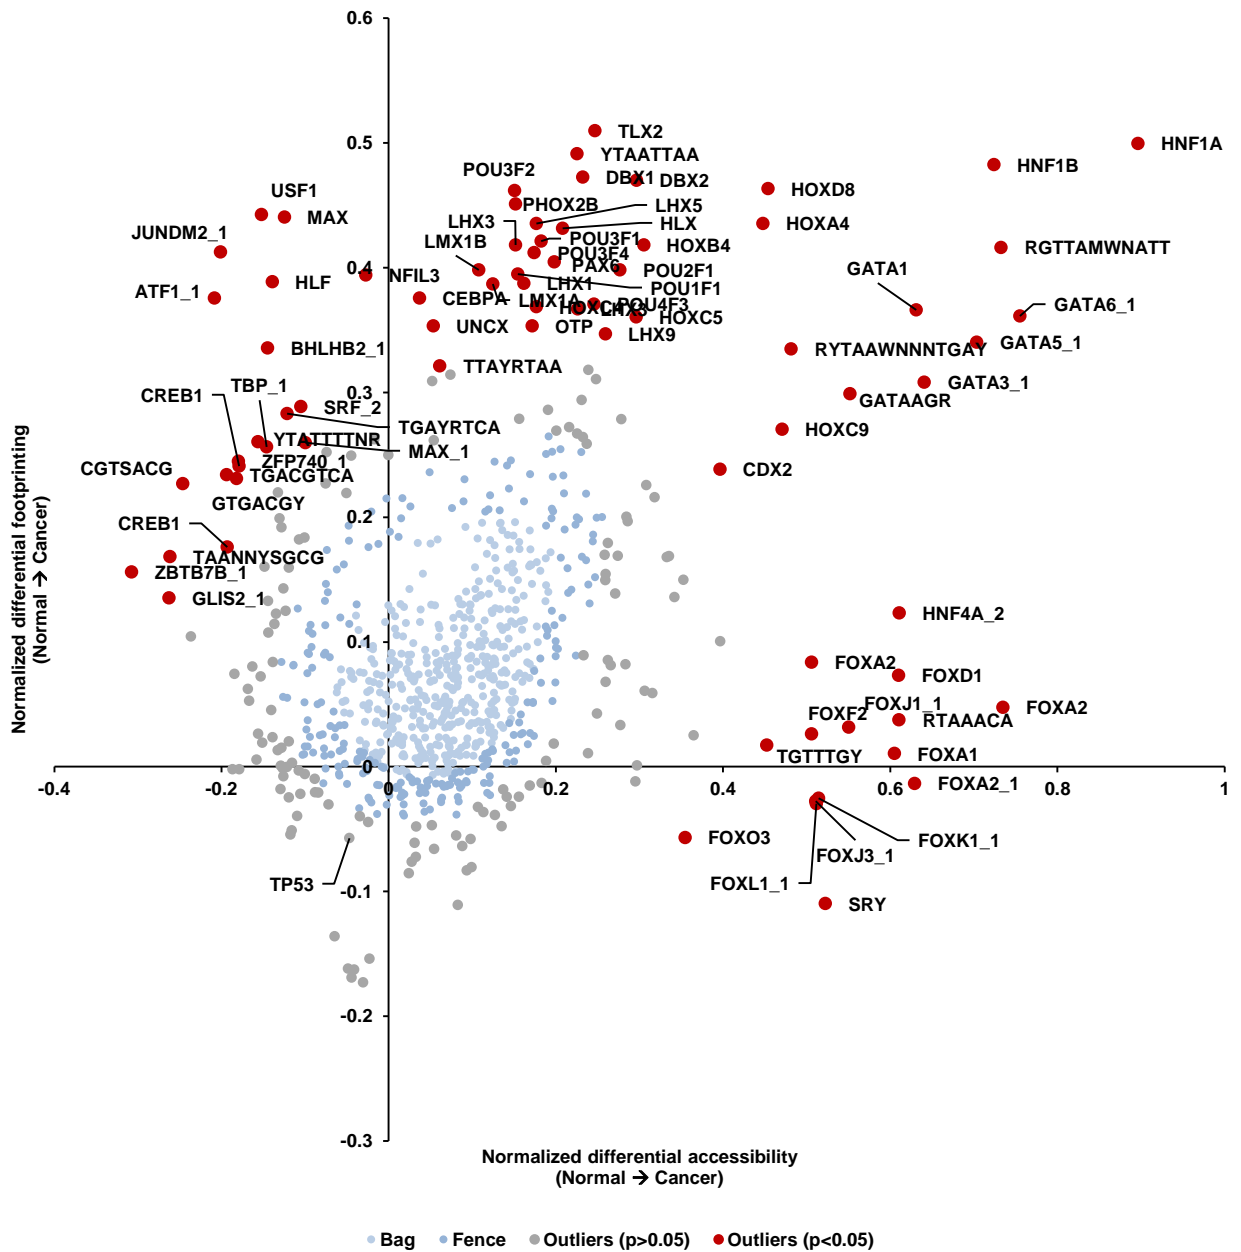

**Figure S2. BaGFoot analysis of open chromatin regions in OAC tissue.** Scatter bag plot of differential chromatin accessibility (x-axis) and footprinting (y-axis) depth around human transcription factor binding motifs in normal and cancer tissue. Significant outliers ( $p < 0.05$ ) are represented in red. This is identical to Fig. 1G but with full labelling of the motifs included.

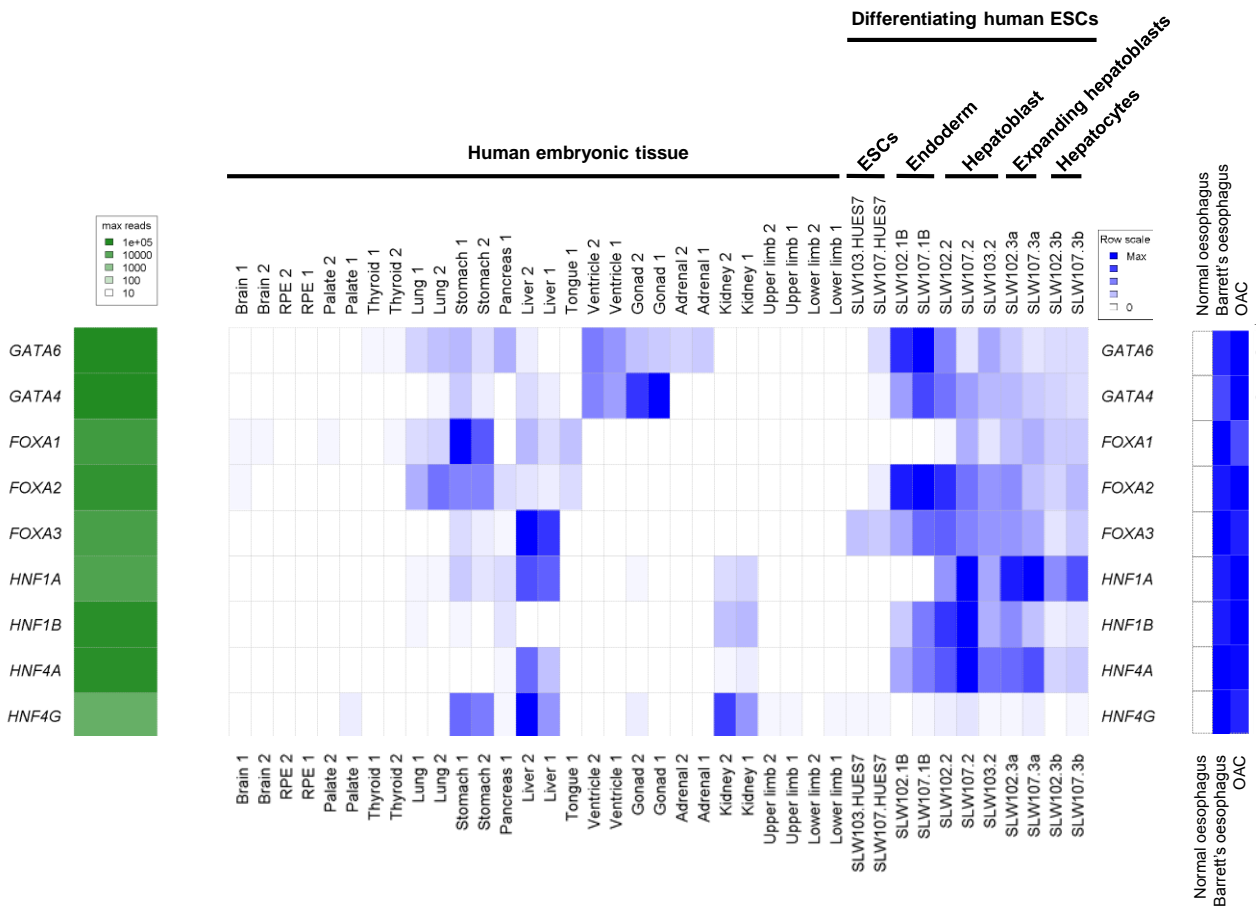

**Figure S3. Expression of OAC-specific transcription factors during embryonic human intestinal development.** Heatmap showing the expression of the indicated transcription factors across the indicated embryonic tissues and differentiated cell types derived from HUES7 embryonic stem cells (left) and expressed in normal, Barrett's and OAC tissue (right). Data are row Z normalized. The maximal number of reads found in one of the tissue/cell samples is shown on the left.

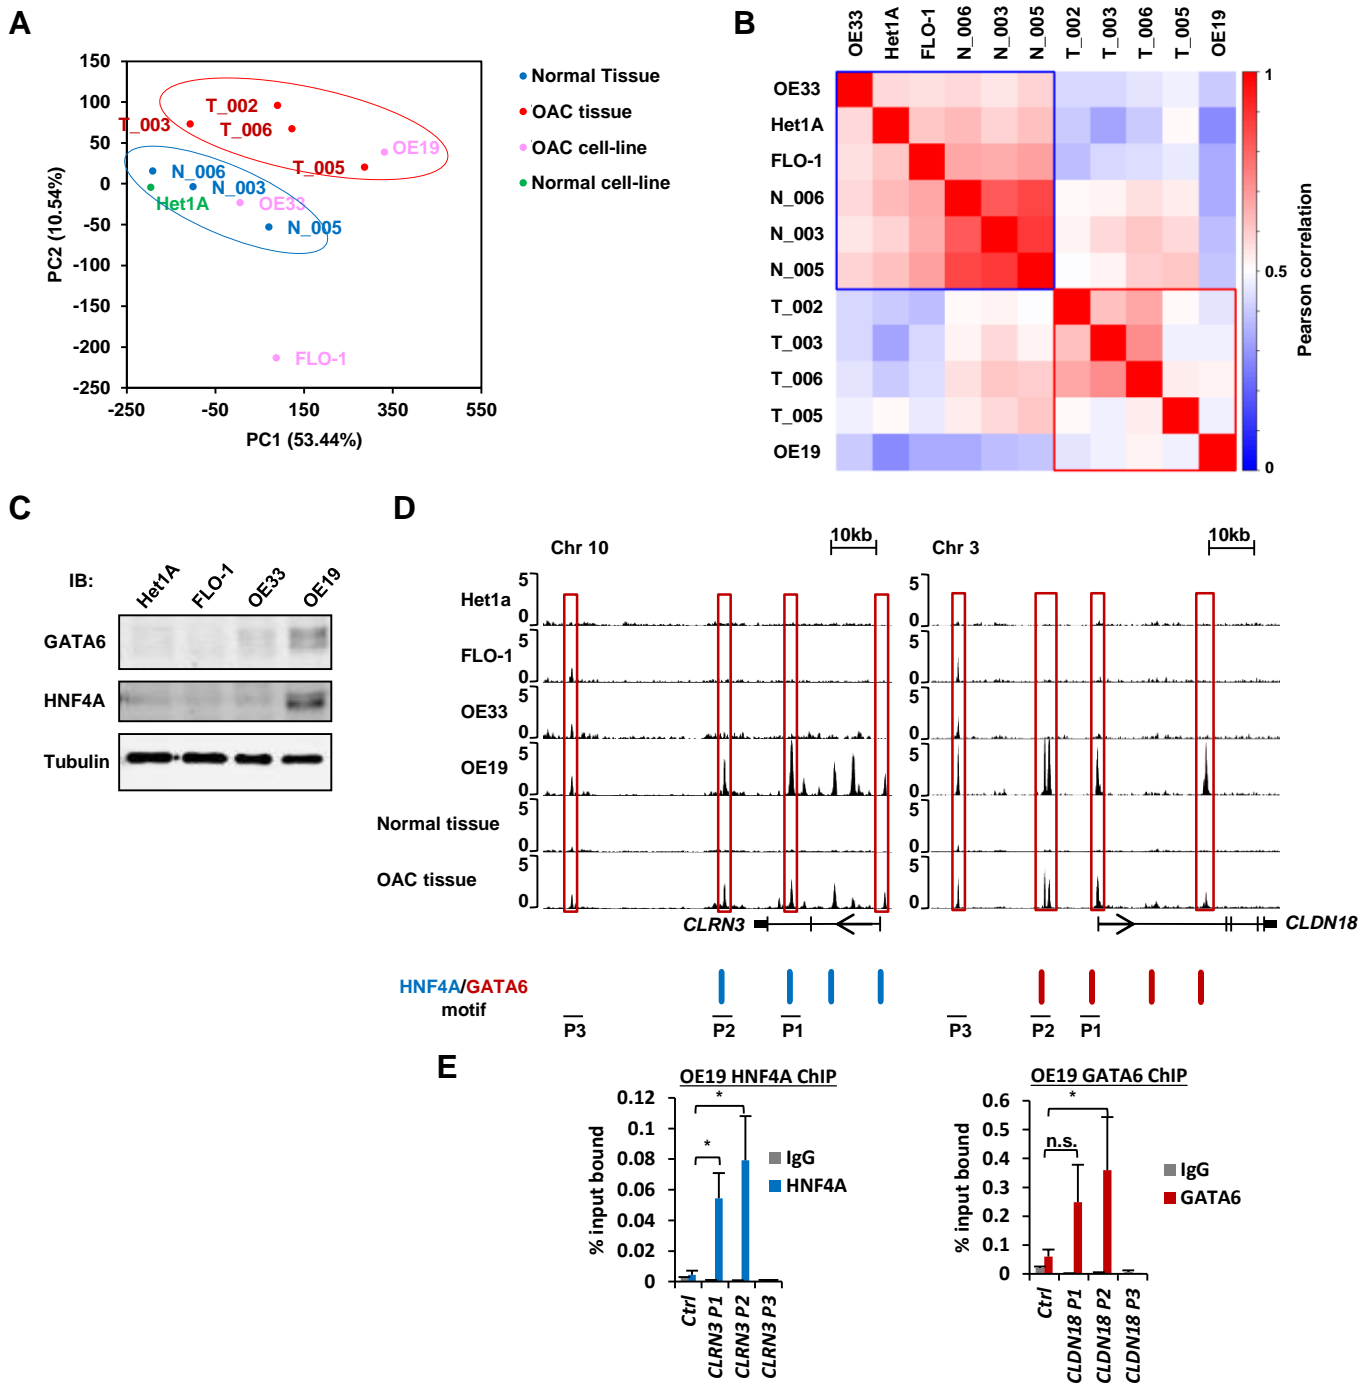

**Figure S4. The chromatin landscape of OE19 cells represents OAC OAC tissue.** (A) PCA plot of ATAC-seq signal from the top 50,000 ATAC-seq regions of data from normal tissue (blue), OAC tissue (red), three OAC cell lines OE33, OE19 and FLO-1 (pink) and a normal oesophageal cell line Het1A (green). (B) Pearson correlation plot of the top 50,000 ATAC-seq regions from normal (N\_), OAC (T\_) and the indicated cell line samples. Samples were clustered hierarchically and the two main clusters are highlighted as a 'normal' cluster (blue) and a 'cancer' cluster (red). (C) Immunoblot for GATA6, HNF4A and Tubulin expression in Het1A, FLO-1, OE33 and OE19 cell lysates. (D) UCSC genome browser tracks showing ATAC-seq signals of two loci surrounding the *CLRN3* and *CLDN18* genes. Common ATAC-seq peaks found in OAC tissue and OE19 cells are highlighted in red. The presence of a HNF4A and GATA6 binding motifs is indicated in blue and red below the peaks. (E) ChIP-qPCR analysis of the indicated ATAC-seq peak regions for HNF4A (left) or GATA6 (right) occupancy in OE19 cells. The identities of the regions tested are shown at the bottom of (D). \* represents  $p < 0.05$  ( $n=3$ ).

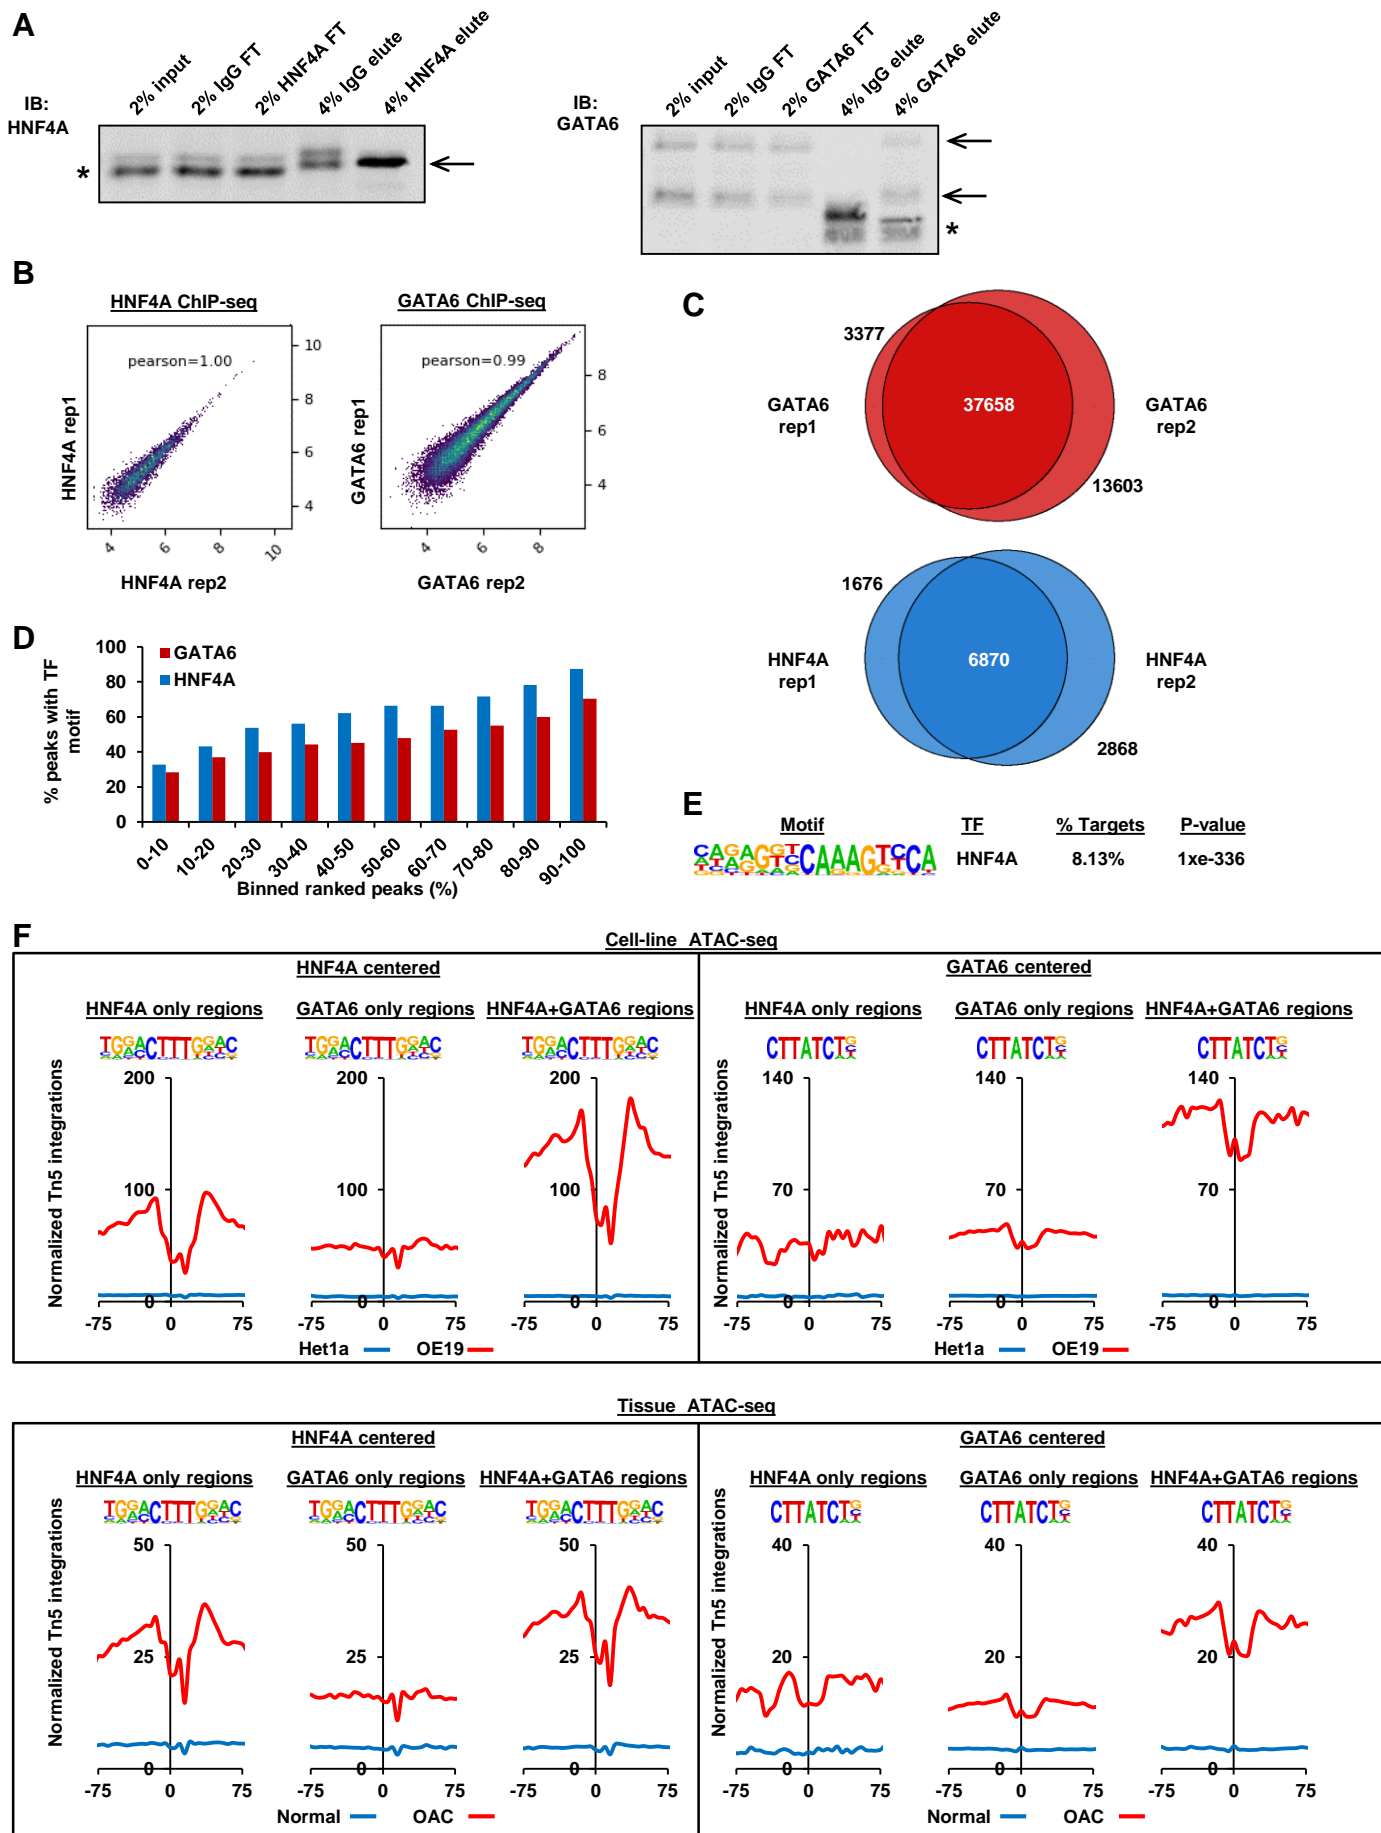

FIG.S5

**Figure S5. HNF4 and GATA6 CHIP-seq analysis.** (A) Immunoblots of HNF4A (left) and GATA6 (right) following CHIP in different fractions; IgG FT (flow through from non-specific IgG precipitation), HNF4A/GATA6 FT (flowthrough from HNF4A/GATA6 precipitation), IgG elute (material eluted following IgG precipitation) HNF4A/GATA6 elute (material eluted following HNF4A/GATA6 precipitation). Arrows indicating immunoprecipitated protein (HNF4A/GATA6) and asterisks are non-specific cross-reacting bands (left) or the IgG heavy chain (right). (B) Scatter plot of CHIPseq signal between experimental replicates for HNF4A and GATA6 with Pearson correlation indicated. (C) Overlap of peaks called by each replicate for HNF4A and GATA6 CHIP-seq. The numbers of peaks in each sector are given. (D) Percentage of HNF4A and GATA6 CHIP-seq peaks with a HNF4A or GATA6 motif respectively. Peaks were sorted on enrichment and separated into bins, each containing 10% of the peaks. The presence of a HNF4A and GATA6 motif was assessed in each bin, with values ranging from 87%-32% for HNF4A and 70%-28% for GATA6. (E) Presence of HNF4A motif in GATA6 CHIP-seq regions. (F) Footprinting of ATAC-seq data from OE19 and Het1A cell-lines (top) or normal and OAC tissue (bottom) on 150 bp regions surrounding the HNF4A (left) or GATA6 (right) transcription factor motifs found in HNF4A-only, GATA6-only and HNF4A+GATA6 co-occupied CHIP-seq regions. Normalised Tn5 integrations are plotted across each of the regions relative to the centre of the binding motif. Data from cancer cells/tissue are shown in red and normal cells/tissue in blue.

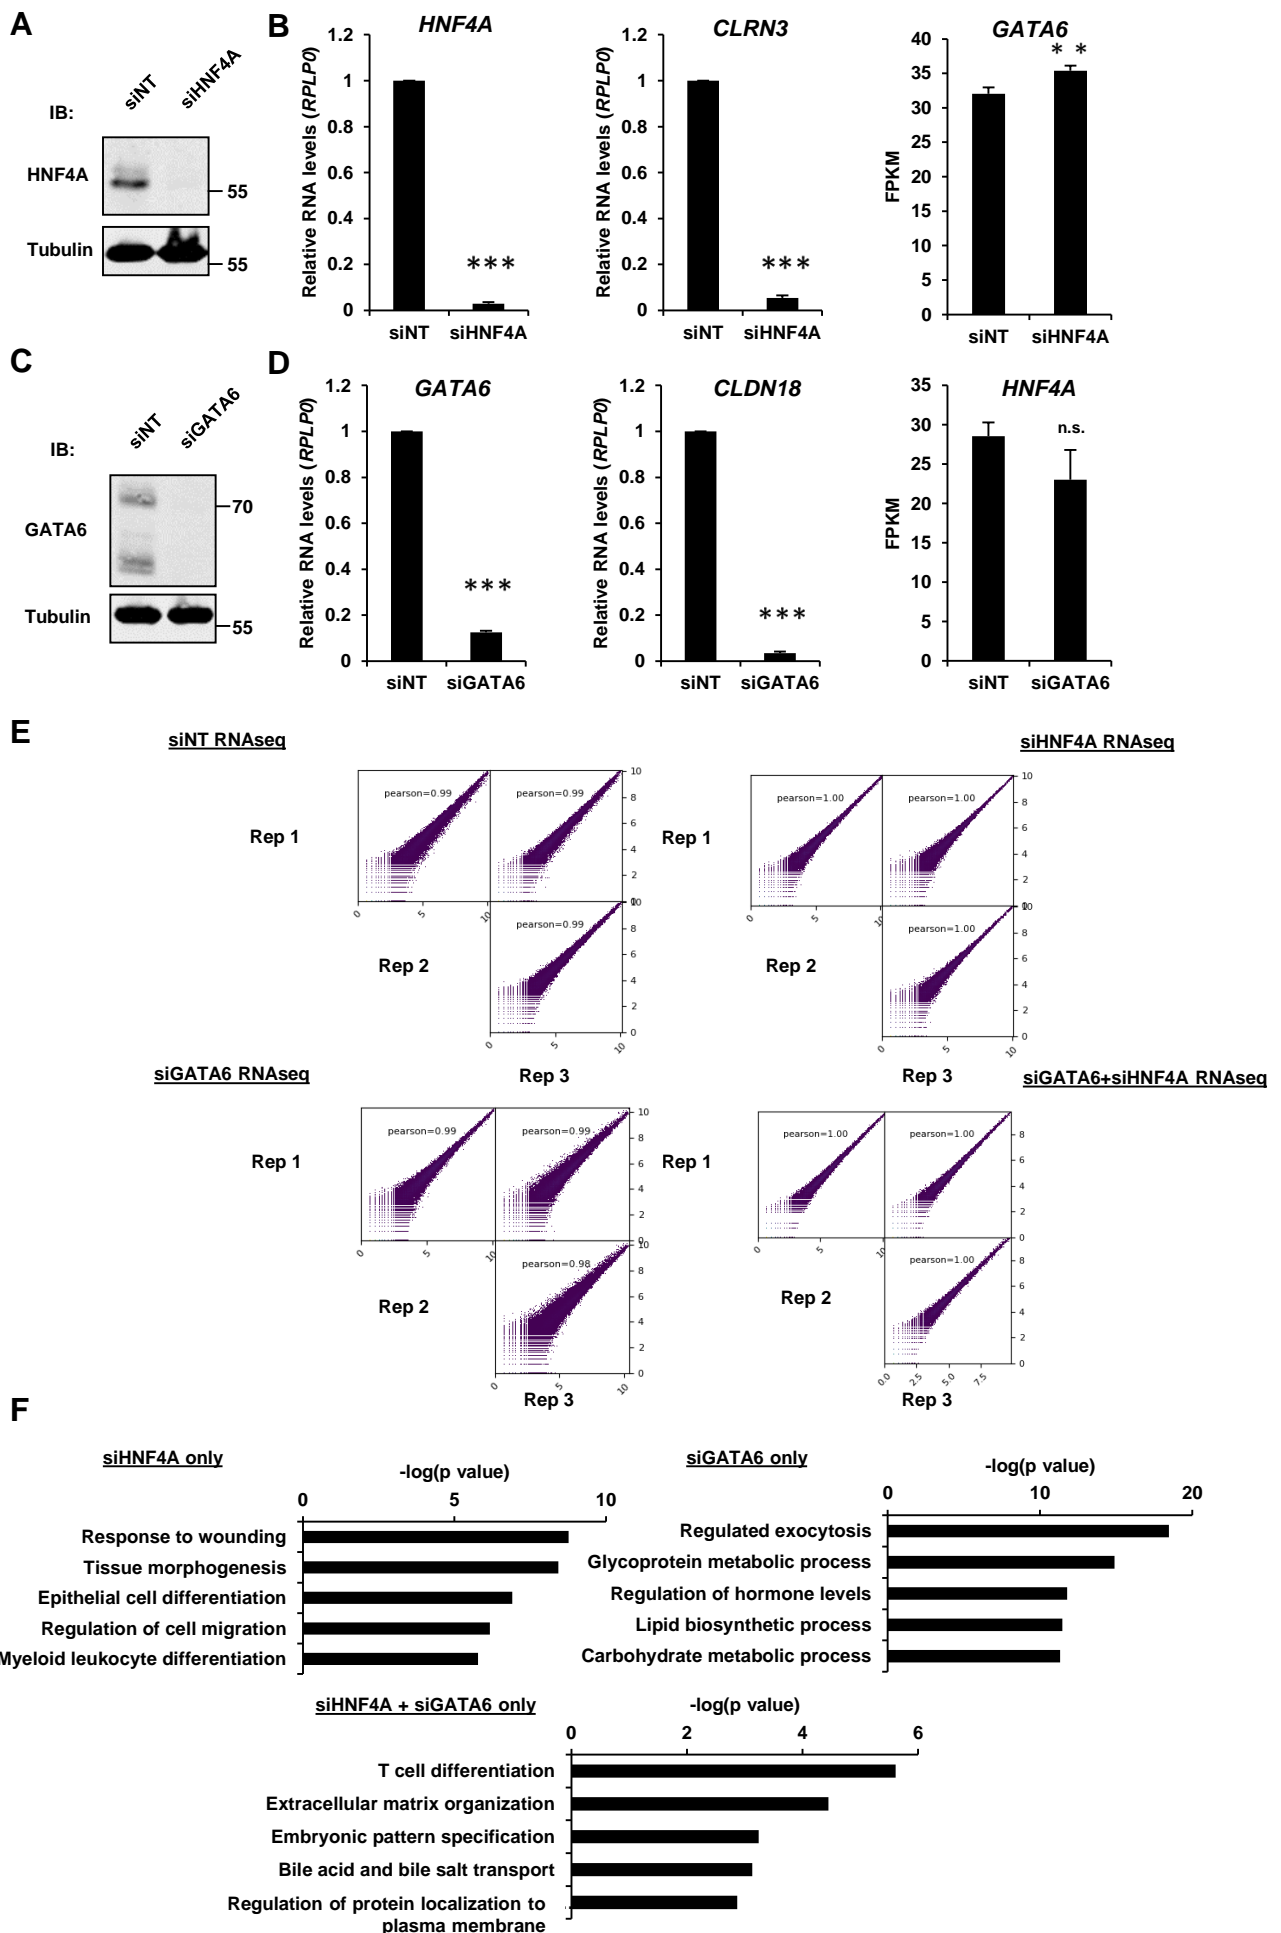

FIG. S6



**Figure S6. HNF4A and GATA6 regulated target genes.** (A and C) Immunoblots of HNF4A (A) and GATA6 (C) expression following 72 hours of transfection with either siNT (non-targeting control), siHNF4A (A) or siGATA6 (C). Tubulin expression was detected as a loading control. (B and D) RNA level expression measured by RT-qPCR analysis of *HNF4A* and *CLRN3* expression after 72 hours of siHNF4A transfection (B) or *GATA6* and *CLDN18* after 72 hours of siGATA6 transfection (D). Expression levels from RNA-seq data of *HNF4A* and *GATA6* following siRNA knockdown of the reciprocal factor shown on the right. Expression in the presence of siNT (non-targeting control) is taken as 1 in all cases. \*\* represents  $p < 0.01$ , \*\*\* represents  $p < 0.001$  (n=3). (E) Correlation plots of replicate RNA-seq data from OE19 cells treated with siNT, siHNF4A, siGATA6 or both siHNF4A+siGATA6 with Pearson's correlation stated. (F) GO term analysis of differentially downregulated genes following siHNF4A, siGATA6 or siHNF4A+siGATA6 treatment. The genes included in the analysis direct targets of the respective transcription factors and are those uniquely downregulated by either HNF4A ("siHNF4A only") or GATA6 (siGATA6 only") depletion (and not also reciprocally regulated by the other factor) or genes that are upregulated either when both or either HNF4A or GATA6 are depleted or only when both factors are depleted ("siHNF4A and siGATA6"). The top 5 most significant terms are shown.

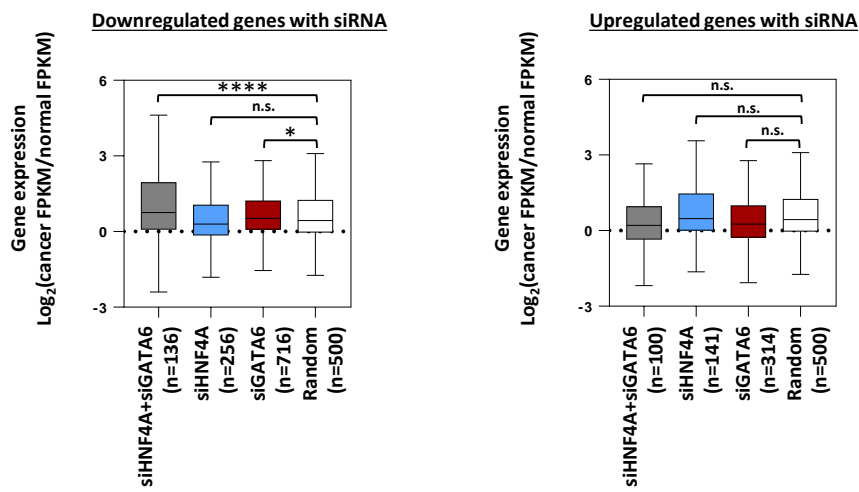

**Figure S7. The expression of direct HNF4A-GATA6 target genes in oesophageal tissues.** Boxplot of changes in gene expression in OAC tissue (shown as cancer/normal FPKM  $\text{log}_2$  fold change) for genes downregulated (A) and upregulated (B) by siRNA against HNF4A (blue), GATA6 (red) or both (black)(TCGA-IC-A6RE-11A/01A data; The Cancer Genome Atlas Research Network, 2017). Whiskers represent 1.5 x IQR. A random (500 randomly selected RefSeq transcripts) dataset is represented in white. \*\*\*\* represents  $p < 0.0001$ , \* represents  $p < 0.05$ .

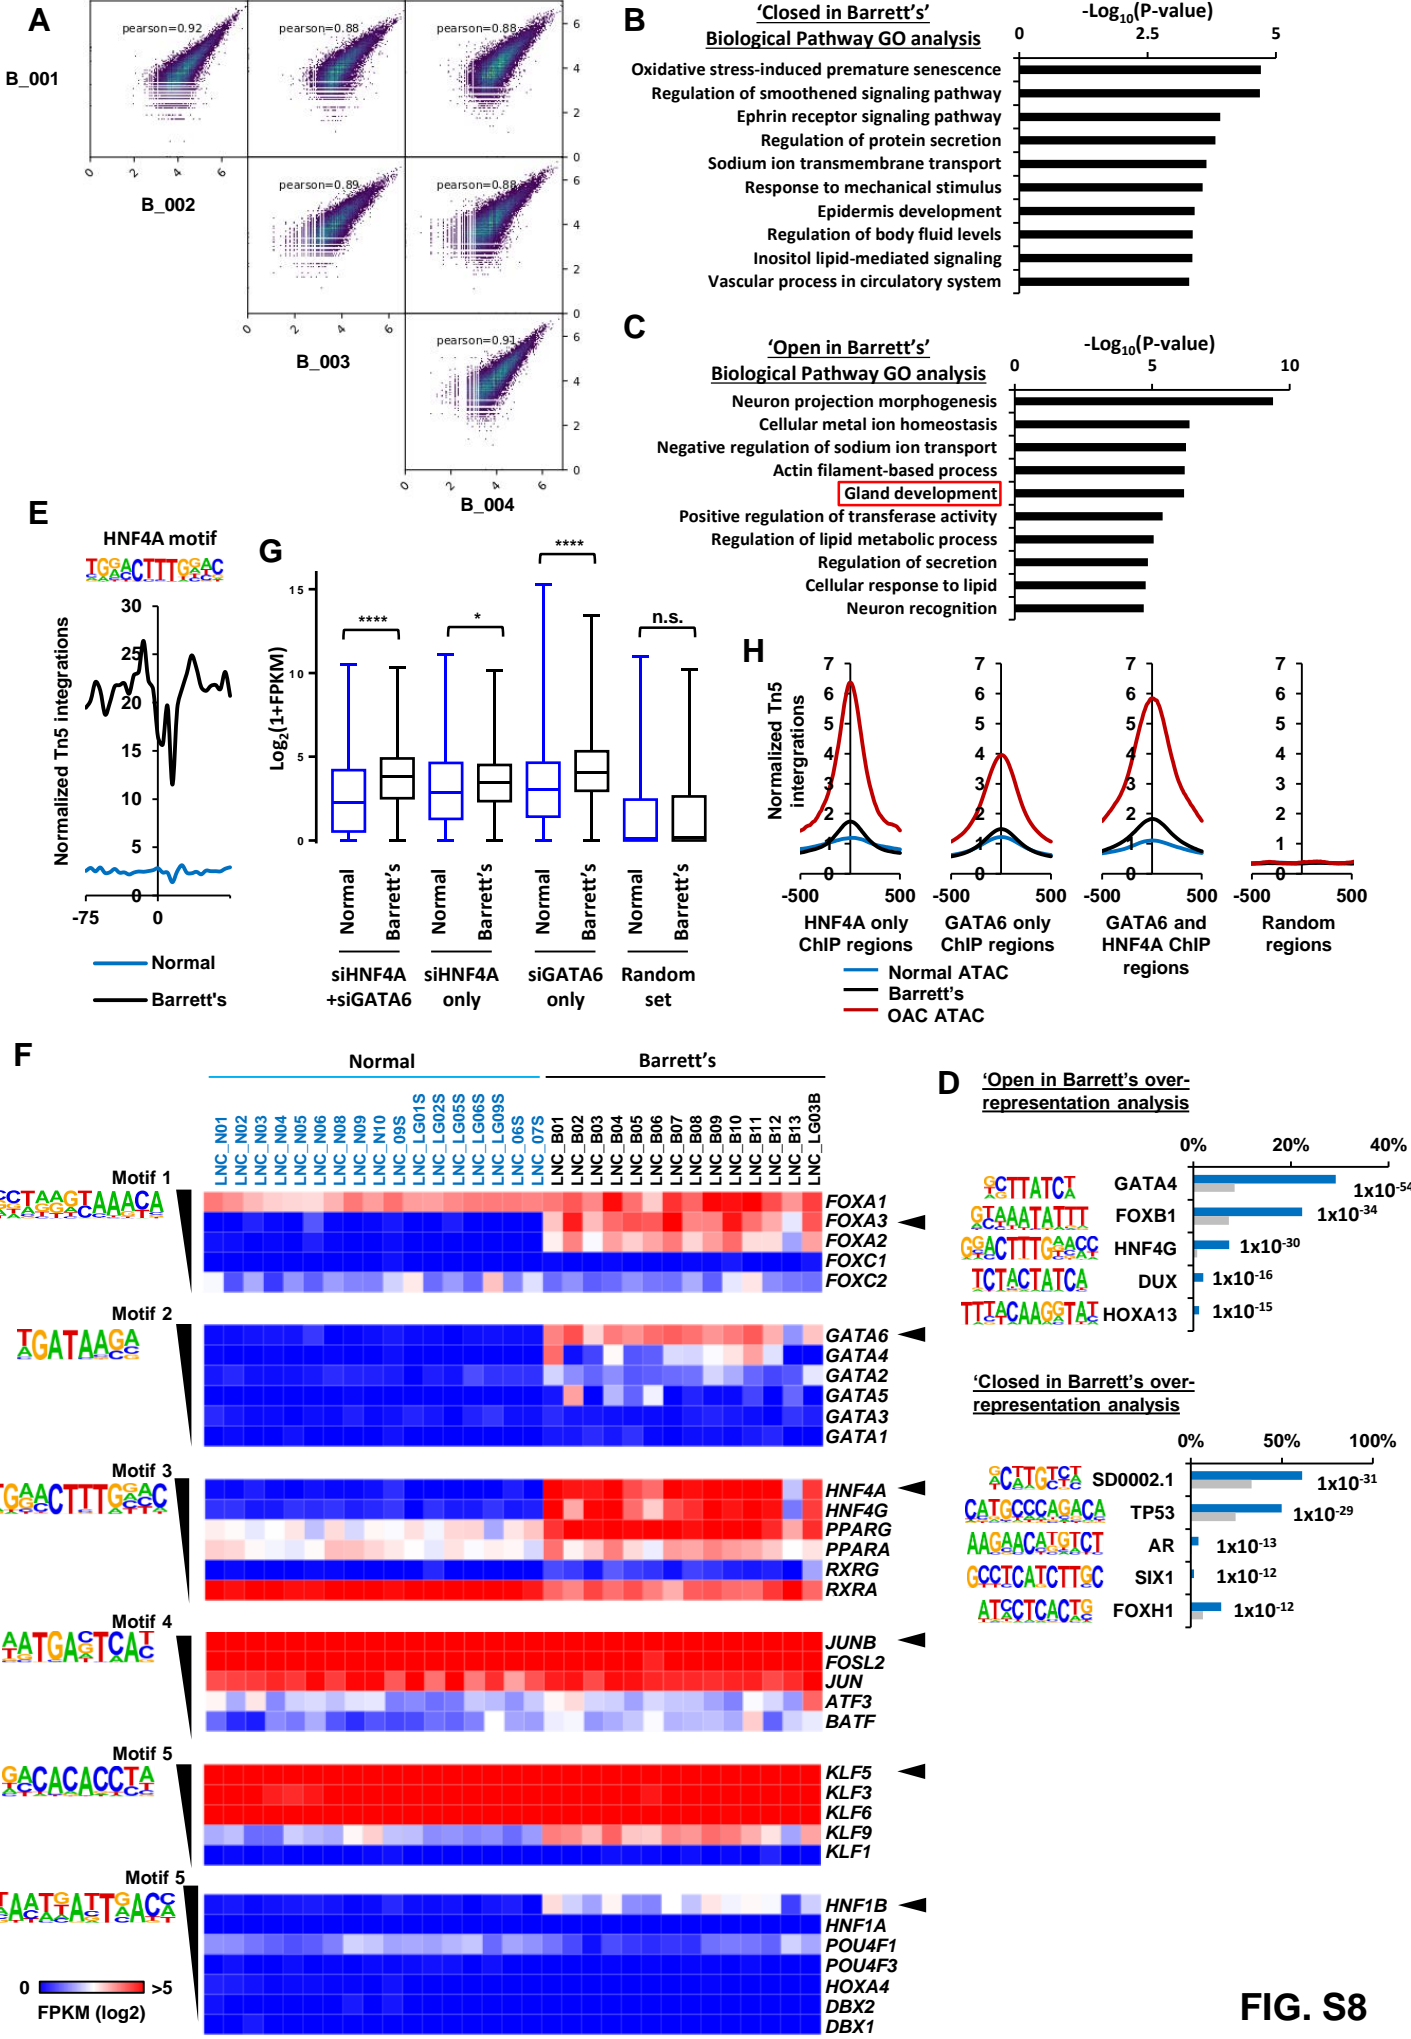

FIG. S8

**Figure S8. Open chromatin profiling and gene expression in Barrett's tissue.** (A) Correlation plots of ATAC-seq data from biopsies non-dysplastic Barrett's tissues (B\_001 to B\_004) with Pearson's correlation stated. (B and C) GO term analysis showing the top enriched biological pathways for genes associated with regions "closed in Barrett's" (B) or "open in Barrett's" (C). The top 10 most significantly enriched categories are shown. (D) Top five DNA motifs derived from de novo motif discovery (using total accessible regions in Barrett's as background rather than whole genome) and their associated transcription factor that are enriched in 'open in Barrett's' (top) or 'closed in Barrett's' (bottom) non-promoter regions. The frequency of motif occurrence is shown and the motifs are sorted by p-value. (E) Footprinting of ATAC-seq data from normal and Barrett's tissue on 150 bp regions surrounding the HNF4A transcription factor motif found in 'Open in Barrett's' regions. Normalised Tn5 integrations are plotted across each of the regions relative to the centre of the binding motif. Data from Barrett's tissue are shown in black and normal tissue in blue. (F) Heatmaps of  $\log_2(1+FPKM)$  values of transcription factors with enriched DNA binding motifs in "open in Barrett's" regions in RNAseq data from normal or Barrett's tissue (Maag et al., 2017). Heatmaps are sorted by highest average fold increase expression in Barrett's (indicated by a triangle) and the highest expressed transcription factor in each case is indicated by an arrow. (G) Boxplot of  $\log_2(1+FPKM)$  values of the expression of genes positively regulated by either HNF4A, GATA6 or both transcription factors in either normal or Barrett's tissue (Maag et al., 2017). \*\*\*\* represents  $p < 0.0001$ , \* represents  $p < 0.05$ . Median values are indicated by the horizontal lines. (H) Tag density plots of normalised ATAC-seq signal from merged normal (blue), Barrett's (black) and OAC (red) tissue from regions bound by HNF4A only, GATA6 only, both factors and random regions as a control.



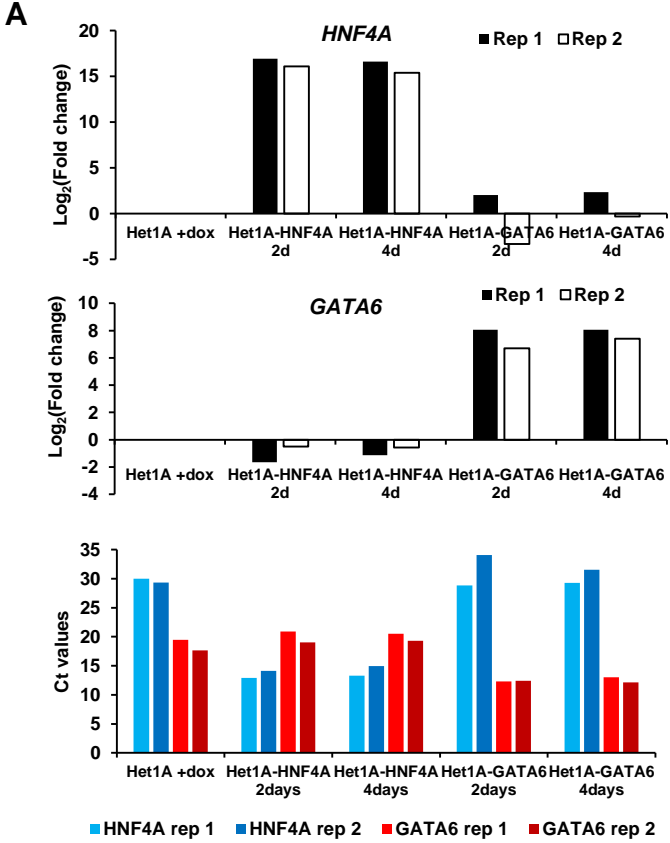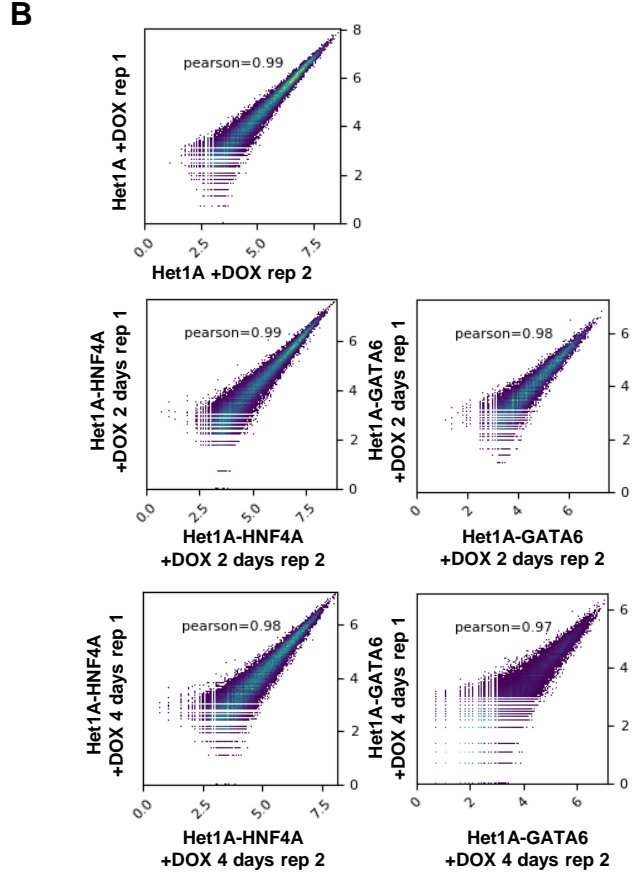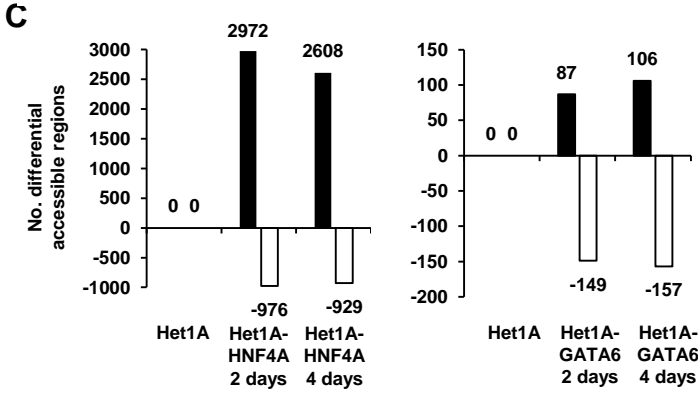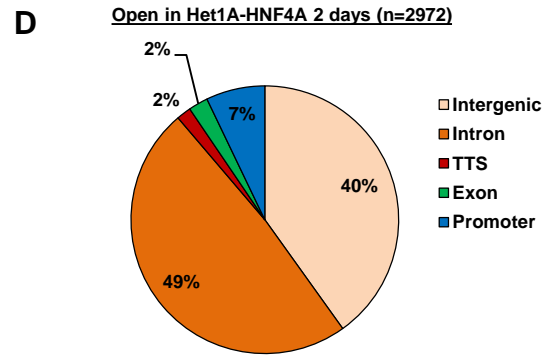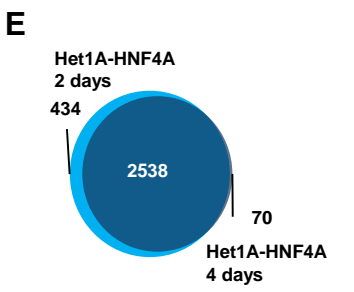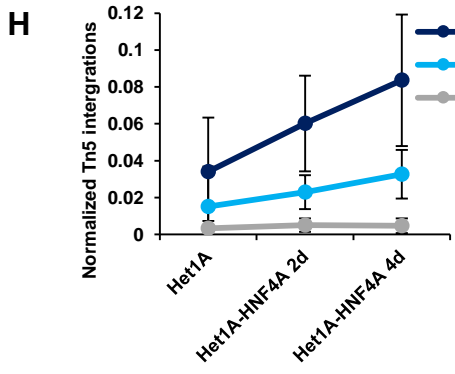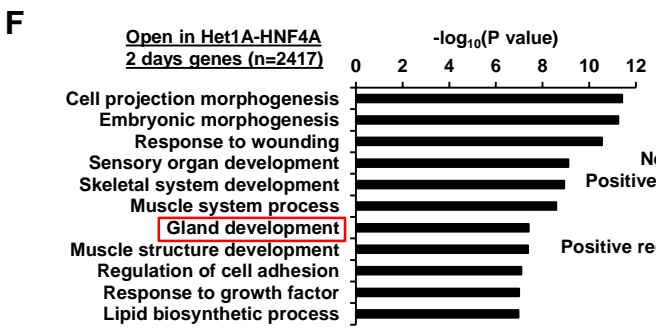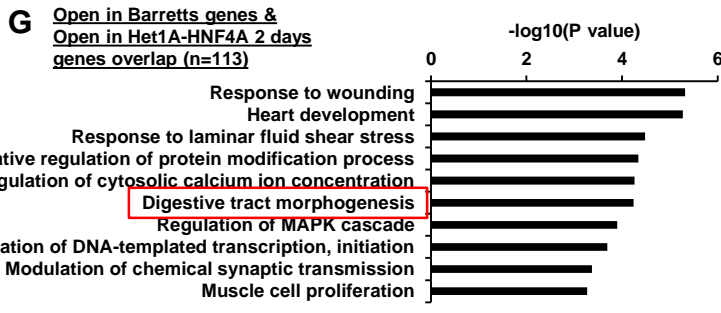

FIG. S10

**Figure S10. Open chromatin profiling of Het1A with overexpression of HNF4A or GATA6.** (A) qRT-PCR of Het1A cells (treated with doxycycline (dox) for four days), or Het1A-HNF4A and Het1A-GATA6 cells treated with doxycycline (dox) for two and four days (d) of induction, using primers for *HNF4A* (top) and *GATA6* (middle). Ct values of samples are also shown (bottom). (B) Correlation plots of ATAC-seq replicates of Het1A cells (+dox), Het1A-HNF4A and Het1A-GATA6 cells (two and four days of induction) with Pearson's correlation stated. (C) Number of differentially accessible regions (linear 5 fold difference) with induction of HNF4A or GATA6 after two or four days dox treatment. (D) Pie chart of the genomic distribution of differentially accessible regions in Het1A-HNF4A after 2 days of dox treatment. Promoter is defined as -2.5 kb to +0.5 kb relative to the TSS. (E) Overlap of differentially more accessible regions between Het1A-HNF4A 2d and Het1A-HNF4A 4d cells with numbers indicated in each quadrant. (F) GO term analysis showing the top enriched biological pathways for genes associated with regions showing increased accessibility following induction of HNF4A expression in Het1A cells. The top 10 most significantly enriched categories are shown. (G) GO term analysis showing the top enriched biological pathway for genes associated with regions showing increased accessibility following induction of HNF4A expression and increased accessibility in Barrett's compared to normal tissue. (H) Average normalised ATAC-seq signal from Het1A or Het1A-HNF4A cells after 2 (2d) or 4 (4d) days induction for regions comprising the three *k*-means clusters in Fig. 5E).

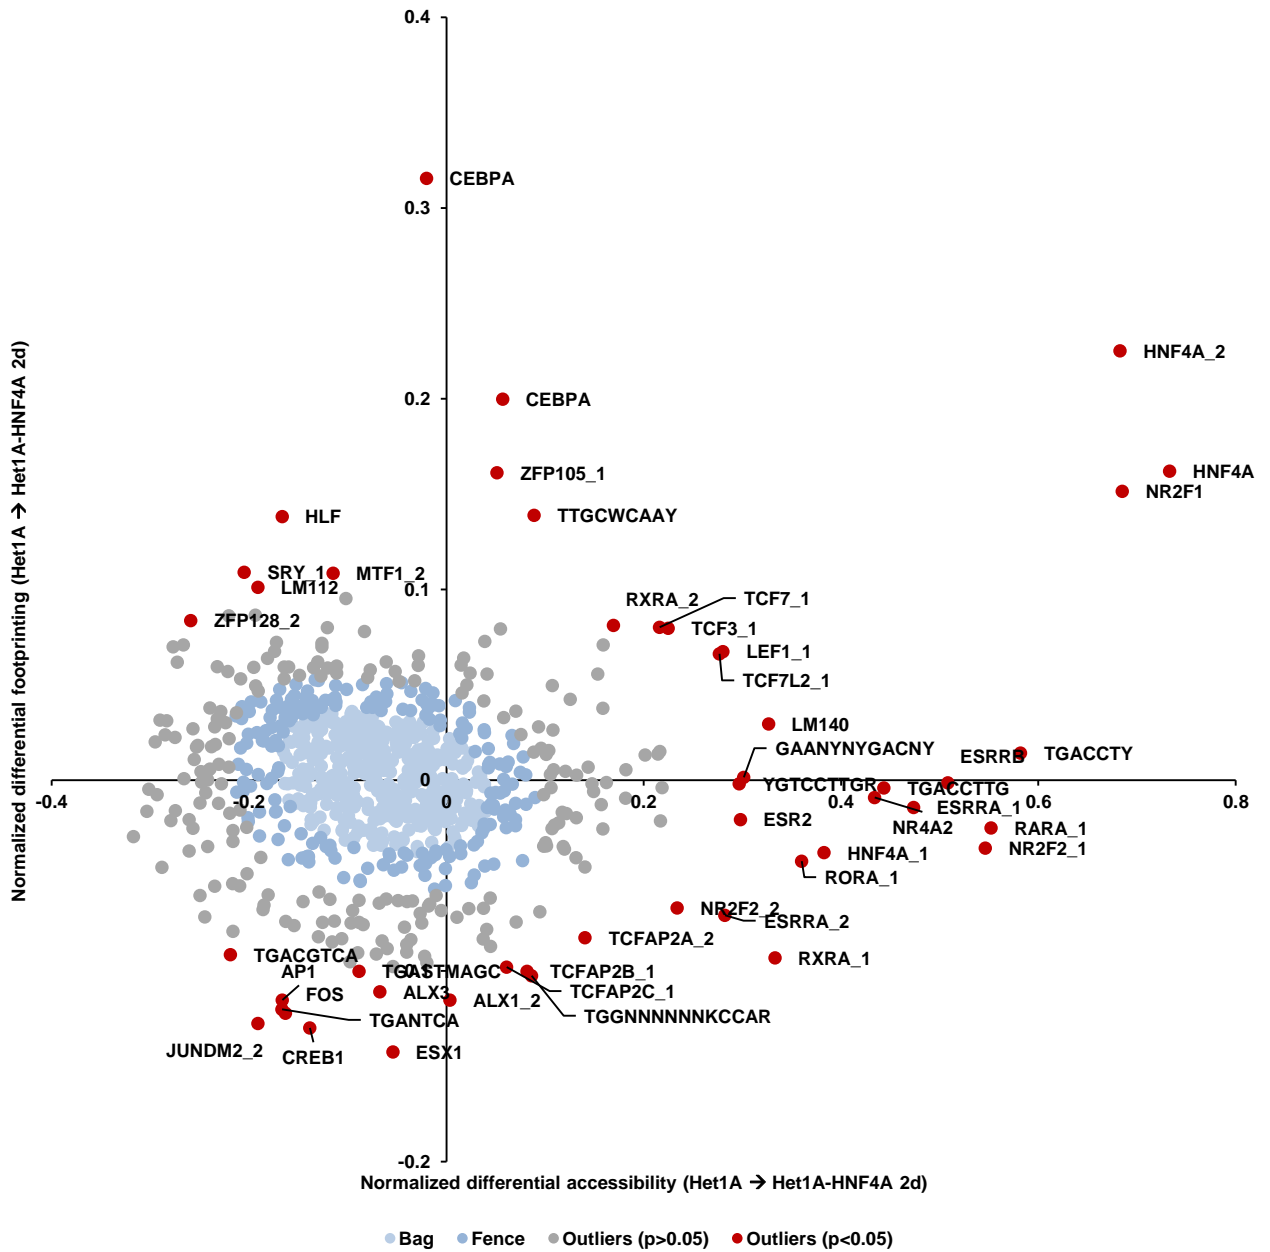

**Figure S11. BaGFoot analysis of open chromatin regions in Het1A-HNF4A cells.** Scatter bag plot of differential chromatin accessibility (x-axis) and footprinting (y-axis) depth around human transcription factor binding motifs in Het1A (+dox) and Het1A-HNF4A (2d) cells. Significant outliers ( $p < 0.05$ ) are represented in red. This is identical to Fig. 5C but with full labelling of the motifs included.



**Supplemental Table S7. DNA motifs enriched in Barrett's-specific open chromatin regions.**

Top ten motifs found by de novo motif discovery and their associated transcription factors that are enriched in 'open in Barrett's' (A) or 'closed in Barrett's' (B) non-promoter regions.

**(A) Open in Barrett's; Non-promoter regions**

| Rank | Motif        | P-value  | log P-pvalue | % of Targets | % of Background | Best Match/Details                                            |
|------|--------------|----------|--------------|--------------|-----------------|---------------------------------------------------------------|
| 1    | CCTAAGTAAACA | 1.00E-95 | -2.20E+02    | 40.32%       | 10.00%          | FOX1M1(Forkhead)/MCF7-FOX1M1-ChIP-Seq(GSE72977)/Homer(0.940)  |
| 2    | TGATAAGA     | 1.00E-70 | -1.63E+02    | 26.54%       | 5.45%           | Gata4(Zf)/Heart-Gata4-ChIP-Seq(GSE35151)/Homer(0.971)         |
| 3    | TGAAC1TTGGAC | 1.00E-67 | -1.54E+02    | 13.64%       | 1.14%           | HNF4G/MA0484.1/Jaspar(0.961)                                  |
| 4    | AATGACTCAT   | 1.00E-65 | -1.52E+02    | 19.94%       | 3.11%           | Atf3(bZIP)/GBM-ATF3-ChIP-Seq(GSE33912)/Homer(0.960)           |
| 5    | GACACACCTA   | 1.00E-31 | -7.34E+01    | 10.85%       | 1.91%           | EKLF(Zf)/Erythrocyte-Klf1-ChIP-Seq(GSE20478)/Homer(0.839)     |
| 6    | ATCATTAAACC  | 1.00E-30 | -7.12E+01    | 13.20%       | 2.97%           | Nkx6.1(Homeobox)/Islet-Nkx6.1-ChIP-Seq(GSE40975)/Homer(0.787) |
| 7    | ACTTCCTGGT   | 1.00E-23 | -5.51E+01    | 10.41%       | 2.38%           | ELF3(ETS)/PDAC-ELF3-ChIP-Seq(GSE64557)/Homer(0.926)           |
| 8    | AGGGTGGAGT   | 1.00E-19 | -4.45E+01    | 10.56%       | 2.96%           | KLF3(Zf)/MEF-Klf3-ChIP-Seq(GSE44748)/Homer(0.844)             |
| 9    | CACTCCCT     | 1.00E-15 | -3.54E+01    | 19.35%       | 9.24%           | KLF5(Zf)/LoVo-KLF5-ChIP-Seq(GSE49402)/Homer(0.746)            |
| 10   | TGATAGCTTG   | 1.00E-13 | -3.16E+01    | 3.96%        | 0.58%           | PH0169.1_Tgif1/Jaspar(0.659)                                  |

**(B) Closed in Barrett's; Non-promoter regions**

| Rank | Motif        | P-value  | log P-pvalue | % of Targets | % of Background | Best Match/Details                                               |
|------|--------------|----------|--------------|--------------|-----------------|------------------------------------------------------------------|
| 1    | CATGCCCAGACA | 1.00E-46 | -1.06E+02    | 58.35%       | 25.77%          | p53(p53)/mES-cMyc-ChIP-Seq(GSE11431)/Homer(0.824)                |
| 2    | CAAGCTTGTT   | 1.00E-36 | -8.42E+01    | 58.58%       | 29.19%          | Nr2e3/MA0164.1/Jaspar(0.810)                                     |
| 3    | TGACTCAT     | 1.00E-35 | -8.19E+01    | 30.89%       | 9.39%           | BATF(bZIP)/Th17-BATF-ChIP-Seq(GSE39756)/Homer(0.980)             |
| 4    | GTTACTGCATGT | 1.00E-24 | -5.62E+01    | 11.90%       | 1.92%           | Ets1-distal(ETS)/CD4+-PolII-ChIP-Seq(Barski_et_al.)/Homer(0.616) |
| 5    | CCTGCCAA     | 1.00E-20 | -4.81E+01    | 38.44%       | 18.86%          | NFIA/MA0670.1/Jaspar(0.885)                                      |
| 6    | AAGAACATGTCT | 1.00E-17 | -3.96E+01    | 4.81%        | 0.33%           | AR-halfsite(NR)/LNCaP-AR-ChIP-Seq(GSE27824)/Homer(0.594)         |
| 7    | TGCCTAAGGC   | 1.00E-16 | -3.83E+01    | 13.27%       | 3.59%           | TFAP2C(var.2)/MA0814.1/Jaspar(0.844)                             |
| 8    | GTTTTGCCCTGG | 1.00E-15 | -3.60E+01    | 2.06%        | 0.02%           | ZNF416(Zf)/HEK293-ZNF416.GFP-ChIP-Seq(GSE58341)/Homer(0.612)     |
| 9    | GCACACGC     | 1.00E-15 | -3.47E+01    | 25.63%       | 11.69%          | PB0130.1_Gm397_2/Jaspar(0.796)                                   |
| 10   | CTTGCTAAGA   | 1.00E-13 | -3.05E+01    | 3.43%        | 0.21%           | PB0054.1_Rfx3_1/Jaspar(0.730)                                    |

**Supplemental Table S9. DNA motifs enriched in chromatin regions that are more accessible upon HNF4A expression.**

| Rank | Motif        | P-value   | log P-pvalue | % of Targets | % of Background | Best Match/Details                                    |
|------|--------------|-----------|--------------|--------------|-----------------|-------------------------------------------------------|
| 1    | TATGACTCAT   | 1e-330    | -7.60E+02    | 28.30%       | 4.42%           | Fra1(bZIP)/BT549-Fra1-ChIP-Seq(GSE46166)/Homer(0.983) |
| 2    | CAAAGTCCAA   | 1.00E-232 | -5.36E+02    | 67.44%       | 34.51%          | HNF4G/MA0484.1/Jaspar(0.899)                          |
| 3    | TAAGGAATGT   | 1.00E-94  | -2.18E+02    | 21.55%       | 7.90%           | TEAD3/MA0808.1/Jaspar(0.961)                          |
| 4    | TCTGCCCTGG   | 1.00E-64  | -1.48E+02    | 28.60%       | 14.92%          | PB0133.1_Hic1_2/Jaspar(0.810)                         |
| 5    | TTTGACCCTGGG | 1.00E-53  | -1.23E+02    | 27.25%       | 14.88%          | EBF1(EBF)/Near-E2A-ChIP-Seq(GSE21512)/Homer(0.699)    |
| 6    | TCTGTGGTTT   | 1.00E-43  | -9.95E+01    | 12.99%       | 5.45%           | RUNX(Runt)/HPC7-Runx1-ChIP-Seq(GSE22178)/Homer(0.959) |
| 7    | GTCCAATGAA   | 1.00E-27  | -6.24E+01    | 7.84%        | 3.20%           | PB0005.1_Bbx_1/Jaspar(0.722)                          |
| 8    | ATTATGAC     | 1.00E-18  | -4.23E+01    | 4.05%        | 1.41%           | PH0065.1_Hoxc10/Jaspar(0.621)                         |
| 9    | AGCTTTGACC   | 1.00E-17  | -4.11E+01    | 3.08%        | 0.91%           | MF0004.1_Nuclear_Receptor_class/Jaspar(0.750)         |
| 10   | GGCAGTCCAA   | 1.00E-16  | -3.91E+01    | 1.69%        | 0.30%           | PB0134.1_Hnf4a_2/Jaspar(0.618)                        |

**Supplemental Table S10. Patient sample information.**

| <b>Samples</b> | <b>Sex</b> | <b>Matched sample</b> |
|----------------|------------|-----------------------|
| N_003          | M          |                       |
| N_005          | F          |                       |
| N_006          | M          |                       |
| B_001          | F          |                       |
| B_002          | M          |                       |
| B_003          | M          |                       |
| B_004          | F          |                       |
| T_001          | M          |                       |
| T_002          | M          |                       |
| T_003          | M          | N_003                 |
| T_004          | M          |                       |
| T_005          | F          | N_005                 |
| T_006          | M          | N_006                 |

**Supplemental Table S11. PCR primers used in this study****ChIP-qPCR**

| Associated gene | Forward (5'-3')      | ADS# | Reverse (5'-3')       | ADS# |
|-----------------|----------------------|------|-----------------------|------|
| Control         | AAGCCCCTCAACAGACTCAA | 5857 | CCTCATAGCTTGACCTTCGAG | 5858 |
| CLRN3_P1        | TGGGAGAGGCAGGCTAACTA | 5869 | GGCCCGTCTCATTTTGAGTA  | 5870 |
| CLRN3_P2        | TGGGAGAGGCAGGCTAACTA | 5871 | GGCCCGTCTCATTTTGAGTA  | 5872 |
| CLRN3_P3        | CCGTGTGAAGGGACATCTTT | 5873 | GCACTCAGCAGGAGTGTGAG  | 5874 |
| CLDN18_P1       | GACCAATCTGCAGTGCCTTC | 5901 | GGGCTTGCCCTACTCCTTTA  | 5902 |
| CLDN18_P2       | CAAACAGAAACCAGCCCTCC | 5903 | GTGGGAAGTGTTAGGGCTGA  | 5904 |
| CLDN18_P3       | GAAAGCGAGTGTGAGGGAAG | 6342 | TGGTCACAGCATTGGTGAT   | 6343 |

**RT-qPCR**

| Gene   | Forward (5'-3')        | ADS# | Reverse (5'-3')          | ADS# |
|--------|------------------------|------|--------------------------|------|
| RPLP0  | ATTACACCTTCCCACTTGCT   | 5454 | CAAAGAGACCAAATCCCATATCCT | 5455 |
| HNF4A  | ATGTACTCCTGCAGATTTAGCC | 5855 | CCTCATAGCTTGACCTTCGAG    | 5856 |
| GATA6  | CTCTACAGCAAGATGAACGG   | 5430 | TGGAGTTTCATGTAGAGTCCAC   | 5431 |
| CLRN3  | CAACCCTTACCAGACATTCC   | 5851 | TATGAGCCAGAACGAGTATCC    | 5852 |
| CLDN18 | ATCATGTTTATTGTCTCAGGTC | 5470 | GGCTTTGTAGTTGGTTTCTTCTG  | 5471 |

## Additional Supplemental Table legends

**Table S1. Differentially accessible regions in OAC patient samples.** (A) Coordinates of the top 50,000 genomic regions showing accessibility across normal and OAC samples. (B and C) Coordinates of regions showing >5 fold changes in accessibility when comparing the average signal in OAC tumour samples T\_002, T\_003, T\_005, T\_006 to normal tissue N\_003, N\_005 and N\_006 among these 50,000 regions. Regions are split according to genomic locations in promoter regions (-2.5 kb to +0.5 kb relative to the TSS) (C) or non-promoter regions (B).

**Table S2. DNA motifs enriched in OAC-specific open chromatin regions.** Top ten motifs found by *de novo* motif discovery and their associated transcription factors that are enriched in 'open in cancer' (A) or 'closed in cancer' (B) promoter or non-promoter regions.

**Table S3. HNF4A and GATA6 binding regions identified by ChIP-seq .** Genomic regions identified by ChIP-seq for HNF4A (A) or GATA6 (B) binding.

**Table S4. DNA motifs enriched in HNF4A and GATA6 ChIP-seq datasets.** Top 25 motifs found by *de novo* motif discovery and their associated transcription factors that are enriched in HNF4A (A) or GATA6 (B) ChIP-seq datasets.

**Table S5. Differentially regulated genes following transcription factor knockdown.** Genes whose expression is deregulated by >1.3 fold (p-value<0.05) following either HNF4A (A and B), GATA6 (C and D) or both HNF4A and GATA6 (E and F) depletion. Data are split between genes up- and down-regulated. Only genes representing likely direct targets (i.e. associated with a nearby HNF4A and/or GATA6 peak) are shown.

**Table S6. Differentially accessible regions in Barrett's patient samples.** (A) Coordinates of the top 50,000 genomic regions showing accessibility across normal and Barrett's samples. (B and C) Coordinates of regions showing >5 fold increase or decrease in accessibility when comparing the average signal in Barrett's samples B\_001-4 to normal tissue N\_003, N\_005 and N\_006 among these 50,000 regions. Regions are split according to genomic locations in promoter regions (-2.5 kb to +0.5 kb relative to the TSS) (C) or non-promoter regions (B).

**Table S8. Differentially accessible regions in Barrett's patient samples.** (A) Coordinates of the top 50,000 genomic regions showing accessibility across Het1A and Het1A-HNF4A cells treated with doxycycline for 2 days. (B and C) Coordinates of regions showing >5 fold increase (B) or decrease (C) in accessibility when comparing the signal in Het1A compared to Het1A-HNF4A cells. (D) Coordinates of the top 50,000 genomic regions showing accessibility across Het1A and Het1A-GATA6 cells treated with doxycycline for 2 days. (E and F) Coordinates of regions showing >5 fold increase (E) or decrease (F) in accessibility when comparing the signal in Het1A compared to Het1A-GATA6 cells.
