# Supplementary material for: Identification of a primitive intestinal transcription factor network shared between esophageal adenocarcinoma and its precancerous precursor state
Source: Genome Res. 2019 May;29(5):723–36. doi: 10.1101/gr.243345.118 (PMC6499311; doi:10.1101/gr.243345.118)
Supplement: Supplemental Material [file supp_gr.243345.118_Supplemental_Table_S1.xlsx]

## Sheet: Legend
Table S1. Differentially accessible regions in OAC patient samples. (A) Coordinates of the top 50,000 genomic regions showing accessibility across normal and OAC samples. (B and C) Coordinates of regions showing >5 fold changes in accessibility when comparing the average signal in OAC tumour samples T_002, T_003, T_005, T_006 to normal tissue N_003, N_005 and N_006 among these 50,000 regions. Reg…

## Sheet: S1A Top 50,000 regions
Chr	Start	End
chr1	143913201	143913701
chr4	166248420	166248920
chr3	98620423	98620923
chr7	94287082	94287582
chr7	100136435	100136935
chr5	41903983	41904483
chr9	123630806	123631306
chr4	83205972	83206472
chr3	93698650	93699150
chr19	42772898	42773398
chr1	9970381	9970881
chr8	28747455	28747955
chr2	676663	677163
chr20	42142669	42143169
chr3	75484293	75484793
chr16	81129874	81130374
chr15	98503434	98503934
chr8	11659861	11660361
chr16	5147894	5148394
chr8	9413099	9413599
chr5	34929272	34929772
chr5	32313035	32313535
chr2	163200284	163200784
chr3	131100243	131100743
chr11	43701862	43702362
chr14	78083017	78083517
chr8	10697277	10697777
chr11	6255887	6256387
chr1	184723888	184724388
chr7	94287536	94288036
chr13	50018092	50018592
chr3	33481775	33482275
chr5	5422150	5422650
chr14	20929654	20930154
chr7	75368250	75368750
chr7	45039317	45039817
chr5	43313568	43314068
chr2	198317877	198318377
chr16	77224504	77225004
chr2	240322721	240323221
chr1	171750310	171750810
chr8	25315864	25316364
chr7	100183814	100184314
chr1	85742093	85742593
chr1	244815908	244816408
chr7	36192401	36192901
chr5	36151865	36152365
chr8	67579328	67579828
chr20	34204107	34204607
chr9	102861168	102861668
chr3	98241596	98242096
chr9	96928135	96928635
chr1	52831801	52832301
chr10	16859285	16859785
chr12	8395563	8396063
chr9	130533518	130534018
chr2	208576021	208576521
chr3	99979453	99979953
chr20	52740117	52740617
chr7	30323816	30324316
chr7	66093607	66094107
chr11	124981444	124981944
chr8	103251179	103251679
chr1	151254356	151254856
chr7	90893484	90893984
chr2	48541246	48541746
chr2	30369267	30369767
chr5	34915467	34915967
chr1	206137893	206138393
chr9	82186446	82186946
chr8	29940382	29940882
chr12	50561045	50561545
chr1	244615077	244615577
chr1	44115447	44115947
chr12	31881677	31882177
chr7	92861345	92861845
chr14	82000133	82000633
chr3	38066356	38066856
chr8	41347755	41348255
chr15	81616385	81616885
chr7	77427577	77428077
chr1	244211476	244211976
chr7	148725618	148726118
chr6	75994394	75994894
chr11	77705727	77706227
chr11	125462293	125462793
chr7	55433437	55433937
chr14	74959995	74960495
chr16	50775604	50776104
chr8	74884332	74884832
chr5	33440692	33441192
chr6	122720409	122720909
chr7	76751547	76752047
chr1	31190923	31191423
chr8	110346228	110346728
chr8	110551608	110552108
chr11	94964330	94964830
chr4	52708923	52709423
chr9	130158935	130159435
chr14	53019138	53019638
chr8	8860104	8860604
chr8	8085560	8086060
chr7	92157740	92158240
chr15	89631251	89631751
chr7	77427745	77428245
chr11	105892909	105893409
chr4	53578255	53578755
chr12	56367443	56367943
chr3	197463640	197464140
chr18	11980859	11981359
chr2	197504066	197504566
chr8	28259351	28259851
chr3	167452635	167453135
chr7	89840799	89841299
chr21	15755371	15755871
chr16	78133135	78133635
chr1	120838431	120838931
chr2	105654199	105654699
chr14	23398490	23398990
chr2	65357150	65357650
chr10	112678851	112679351
chr2	215674559	215675059
chr17	45726764	45727264
chr13	111567424	111567924
chr6	116892224	116892724
chr14	23755211	23755711
chr1	233462996	233463496
chr20	44440888	44441388
chr14	66974478	66974978
chr17	79980749	79981249
chr2	54950360	54950860
chr9	104160786	104161286
chr14	74551057	74551557
chr10	106028583	106029083
chr16	53537041	53537541
chr1	228327516	228328016
chr11	77899515	77900015
chr3	100427996	100428496
chr11	108093347	108093847
chr19	42579916	42580416
chr3	172468183	172468683
chr9	77643089	77643589
chr8	42010084	42010584
chr11	82867610	82868110
chr7	86974648	86975148
chr20	26188808	26189308
chr7	97881313	97881813
chr17	47841447	47841947
chr4	9693196	9693696
chr3	66551324	66551824
chr1	227127587	227128087
chr19	48972203	48972703
chr3	5229035	5229535
chr12	122710485	122710985
chr6	20401692	20402192
chr9	139685203	139685703
chr3	179280348	179280848
chr8	41386373	41386873
chr10	76585956	76586456
chr7	112579831	112580331
chr6	151773174	151773674
chr7	38217497	38217997
chr1	231114443	231114943
chr3	38178484	38178984
chr17	79196644	79197144
chr20	33463813	33464313
chr1	185126016	185126516
chr1	228353119	228353619
chr16	72042315	72042815
chr7	99746152	99746652
chr19	5904254	5904754
chr14	21924122	21924622
chr4	2537913	2538413
chr13	98085209	98085709
chr12	117175722	117176222
chr1	193090903	193091403
chr11	62521483	62521983
chr3	43663516	43664016
chr14	76127092	76127592
chr13	50510313	50510813
chr16	30759356	30759856
chr20	52684150	52684650
chr4	141444964	141445464
chr2	176032853	176033353
chr1	153700124	153700624
chr19	50269577	50270077
chr19	36606000	36606500
chr20	5107248	5107748
chr20	3869666	3870166
chr4	159593051	159593551
chr14	20811228	20811728
chr11	73881913	73882413
chr3	131080361	131080861
chr5	137667410	137667910
chr8	73920748	73921248
chr7	72649374	72649874
chr11	67007135	67007635
chr4	83955950	83956450
chr12	57472393	57472893
chr6	155635581	155636081
chr15	85923438	85923938
chr3	67048295	67048795
chr7	42971650	42972150
chr20	60813167	60813667
chr9	84304507	84305007
chr3	195163699	195164199
chr11	3818721	3819221
chr4	6271210	6271710
chr7	87505389	87505889
chr19	40476694	40477194
chr9	131843029	131843529
chr5	168006540	168007040
chr7	72298559	72299059
chr16	9185109	9185609
chr10	101418863	101419363
chr8	12051624	12052124
chr6	52149531	52150031
chr10	91461005	91461505
chr1	159750387	159750887
chr11	44586656	44587156
chr3	37034439	37034939
chr17	26368428	26368928
chr12	133170454	133170954
chr14	105219067	105219567
chr17	57184111	57184611
chr2	208394427	208394927
chrX	16804154	16804654
chr17	56595199	56595699
chr1	170043586	170044086
chr12	39836917	39837417
chr7	32534791	32535291
chr3	88107931	88108431
chr13	53226626	53227126
chr14	23790100	23790600
chr19	54641047	54641547
chr6	167040690	167041190
chr14	71276196	71276696
chr7	97501573	97502073
chr1	212458288	212458788
chr2	24299180	24299680
chr3	105085355	105085855
chr20	40246910	40247410
chr5	108084328	108084828
chr15	40857071	40857571
chr2	64977987	64978487
chr8	104427192	104427692
chr5	150632300	150632800
chr8	30890945	30891445
chr9	77703048	77703548
chr11	105948020	105948520
chr9	127905679	127906179
chr14	97263388	97263888
chr10	3214839	3215339
chr1	221915302	221915802
chr7	77325407	77325907
chr7	1499056	1499556
chr4	775588	776088
chr20	39657047	39657547
chr2	37193567	37194067
chr4	170541328	170541828
chr7	7680018	7680518
chr5	31532058	31532558
chr14	59655041	59655541
chr15	89089661	89090161
chr7	44121986	44122486
chr1	65885779	65886279
chr11	2421617	2422117
chr7	134331204	134331704
chr14	100659143	100659643
chr11	63953253	63953753
chr7	102389046	102389546
chr17	47866342	47866842
chr8	92082223	92082723
chr3	135969217	135969717
chr2	74685199	74685699
chr9	130007288	130007788
chr10	12110566	12111066
chr7	44646203	44646703
chr10	97453555	97454055
chr12	54121130	54121630
chr3	182817140	182817640
chr1	89458441	89458941
chr12	88535744	88536244
chr9	139685443	139685943
chr6	80816070	80816570
chr1	68150621	68151121
chr2	88926859	88927359
chr7	102003970	102004470
chr3	119813648	119814148
chr5	74632616	74633116
chr14	77589785	77590285
chr4	39183750	39184250
chr7	137686828	137687328
chr16	67840336	67840836
chr20	43513978	43514478
chr14	62161779	62162279
chr17	61699304	61699804
chr19	36505018	36505518
chr5	151151117	151151617
chr6	37225230	37225730
chr7	76009120	76009620
chr9	123605073	123605573
chr11	82782729	82783229
chr14	105957152	105957652
chr11	6704481	6704981
chr9	110045080	110045580
chr4	48782166	48782666
chr7	124569769	124570269
chr7	101500046	101500546
chr11	85339259	85339759
chr20	17662781	17663281
chr7	44162998	44163498
chr13	111367747	111368247
chr10	105991918	105992418
chr3	113415424	113415924
chr1	246729443	246729943
chr11	76155565	76156065
chr11	105947893	105948393
chr6	151711404	151711904
chr5	7868985	7869485
chr7	23053531	23054031
chr1	186344262	186344762
chr14	73493659	73494159
chr7	11013142	11013642
chr1	241682886	241683386
chr4	128886250	128886750
chr8	126010388	126010888
chr4	184580142	184580642
chr17	79818505	79819005
chr17	45973254	45973754
chr11	13689827	13690327
chr4	68566744	68567244
chr7	21466599	21467099
chr6	56954594	56955094
chr11	57435126	57435626
chr7	75988400	75988900
chr1	172501929	172502429
chr10	92980179	92980679
chr19	54640721	54641221
chr7	127291835	127292335
chr12	56497957	56498457
chr1	209920978	209921478
chr10	28591887	28592387
chr11	66725762	66726262
chr17	73900881	73901381
chr17	40540344	40540844
chr3	167813554	167814054
chr9	100395555	100396055
chr15	49912910	49913410
chr11	59383142	59383642
chr12	49075874	49076374
chr11	122932758	122933258
chr8	67525443	67525943
chr7	55141547	55142047
chr8	11314006	11314506
chr2	171785327	171785827
chr13	73301718	73302218
chr11	114309878	114310378
chr7	74508626	74509126
chr7	12726082	12726582
chr8	11626957	11627457
chr2	64978212	64978712
chr14	99947317	99947817
chr19	39340879	39341379
chr20	47804794	47805294
chr7	158497454	158497954
chr11	65819432	65819932
chr13	20437576	20438076
chr14	73392807	73393307
chr15	101142336	101142836
chr10	58120878	58121378
chr2	136498981	136499481
chr2	26256564	26257064
chr14	105218849	105219349
chr7	106808872	106809372
chr8	124084578	124085078
chr6	153304101	153304601
chr15	77223752	77224252
chr7	25164822	25165322
chr16	28961851	28962351
chr2	33824271	33824771
chr4	37687938	37688438
chr7	132766739	132767239
chr3	9772794	9773294
chr17	42852884	42853384
chr11	74204045	74204545
chr3	125634753	125635253
chr11	77531726	77532226
chr3	114866312	114866812
chr1	220219690	220220190
chr1	193028344	193028844
chr16	75551093	75551593
chr3	50273132	50273632
chr15	89181850	89182350
chr16	72127438	72127938
chr5	43121365	43121865
chr15	45571224	45571724
chr19	19174373	19174873
chr1	54518849	54519349
chr11	125932609	125933109
chr11	134123125	134123625
chr13	111358380	111358880
chr20	35579931	35580431
chr1	151762836	151763336
chr11	4629238	4629738
chr9	140499493	140499993
chr1	45139971	45140471
chr11	14913585	14914085
chr19	47551733	47552233
chr12	75784647	75785147
chr1	160990856	160991356
chr2	101179065	101179565
chr19	52692771	52693271
chr4	108641304	108641804
chr20	32077428	32077928
chr14	36295250	36295750
chr3	98312335	98312835
chr7	90032506	90033006
chr3	169939939	169940439
chr8	28479717	28480217
chr2	46925910	46926410
chr2	232378888	232379388
chr19	4968545	4969045
chr16	75498466	75498966
chr8	30585202	30585702
chr19	19887111	19887611
chr8	99838064	99838564
chr8	30515576	30516076
chr8	8085309	8085809
chr16	46722979	46723479
chrX	48660131	48660631
chr12	56753812	56754312
chr20	34542278	34542778
chr1	164527910	164528410
chr4	10118247	10118747
chr2	175351726	175352226
chr16	30381863	30382363
chr13	95253778	95254278
chr20	32580814	32581314
chr4	120133558	120134058
chr13	96328987	96329487
chr15	77712411	77712911
chr7	56173996	56174496
chr9	74525960	74526460
chr17	79212694	79213194
chr15	49103134	49103634
chr17	58754903	58755403
chr1	6845129	6845629
chr8	38853936	38854436
chr10	99400152	99400652
chr15	93425518	93426018
chr1	243418999	243419499
chr9	100908384	100908884
chr7	91569861	91570361
chr7	100895458	100895958
chr7	66461529	66462029
chr3	129830392	129830892
chr9	108006519	108007019
chr7	149068	149568
chr3	155572161	155572661
chr2	133104753	133105253
chr3	57583075	57583575
chr13	45915353	45915853
chr17	4870479	4870979
chr14	45366107	45366607
chr1	70876580	70877080
chr2	88990885	88991385
chr10	25305245	25305745
chr9	140135238	140135738
chr2	70141600	70142100
chr6	90539283	90539783
chr3	113775189	113775689
chr14	81407926	81408426
chr6	52368974	52369474
chr10	115933833	115934333
chr7	77166013	77166513
chr10	91011526	91012026
chr3	158390269	158390769
chr1	68962636	68963136
chr14	91527039	91527539
chr16	4303791	4304291
chr4	18023475	18023975
chr8	57123791	57124291
chr9	95527030	95527530
chr16	75018836	75019336
chr14	21944977	21945477
chr20	5100460	5100960
chr19	37861716	37862216
chr16	89556933	89557433
chr14	53196489	53196989
chr2	74881112	74881612
chr7	64126157	64126657
chr19	48867194	48867694
chr19	34850049	34850549
chr2	114647294	114647794
chr1	225965190	225965690
chr14	91526829	91527329
chr14	96858022	96858522
chr8	62627060	62627560
chr7	12250640	12251140
chr17	30228587	30229087
chr3	120461193	120461693
chr20	50383532	50384032
chr9	134000610	134001110
chr10	124913560	124914060
chr12	53773407	53773907
chr10	94050625	94051125
chr8	124286769	124287269
chr9	140095129	140095629
chr7	39989043	39989543
chr6	89673208	89673708
chr2	172290365	172290865
chr10	101190396	101190896
chr5	159546394	159546894
chr19	19496244	19496744
chr6	42981586	42982086
chr20	35807192	35807692
chr3	156272767	156273267
chr7	35840417	35840917
chr2	187454459	187454959
chr16	29984777	29985277
chr3	38206329	38206829
chr2	11295090	11295590
chr3	190231505	190232005
chr3	37901793	37902293
chr3	8543135	8543635
chr5	122758906	122759406
chr12	113658866	113659366
chr20	47894483	47894983
chr9	133587872	133588372
chr4	89205644	89206144
chr2	24299334	24299834
chr10	46167948	46168448
chr6	10723010	10723510
chr13	25496824	25497324
chr20	43035969	43036469
chr22	41682127	41682627
chr9	131486256	131486756
chr4	8160415	8160915
chr4	190861605	190862105
chr19	55850596	55851096
chr2	220094192	220094692
chr7	55433755	55434255
chr9	116163495	116163995
chr12	50134946	50135446
chr11	65382714	65383214
chr1	227975609	227976109
chr4	1340633	1341133
chr2	24270120	24270620
chr14	104181742	104182242
chr11	108464252	108464752
chr1	153895287	153895787
chr1	2517732	2518232
chr17	46969696	46970196
chr15	49462070	49462570
chr16	74700630	74701130
chr11	118991885	118992385
chr14	64108491	64108991
chr9	34989309	34989809
chr1	33502316	33502816
chr6	70506777	70507277
chr16	18812733	18813233
chrX	20159833	20160333
chr1	85742251	85742751
chr8	29144331	29144831
chr5	693290	693790
chr11	66056472	66056972
chr12	30907613	30908113
chr7	152160750	152161250
chr4	48343007	48343507
chr11	57092296	57092796
chr8	109455497	109455997
chr16	53737602	53738102
chr2	88927007	88927507
chr2	55277491	55277991
chr1	169455003	169455503
chr5	145582799	145583299
chr4	467787	468287
chr18	18691699	18692199
chr12	56521639	56522139
chr2	198364443	198364943
chr7	112090119	112090619
chr3	105587698	105588198
chr13	101327039	101327539
chr11	9482103	9482603
chr19	52097486	52097986
chr4	2263766	2264266
chr2	203879125	203879625
chr14	39644063	39644563
chr8	67340857	67341357
chr9	139981073	139981573
chr7	128864427	128864927
chr14	96000878	96001378
chr9	123964035	123964535
chr7	44621689	44622189
chr7	8008056	8008556
chr16	1832580	1833080
chr7	25901998	25902498
chr1	180600799	180601299
chr2	135675936	135676436
chr2	74756775	74757275
chr7	56119086	56119586
chr5	8457405	8457905
chr3	180629913	180630413
chr1	201139751	201140251
chr19	4471597	4472097
chr8	103424880	103425380
chr15	33486786	33487286
chr12	95611179	95611679
chr5	271306	271806
chr4	123653427	123653927
chr20	52686878	52687378
chr11	66080168	66080668
chr11	57298153	57298653
chr17	19281423	19281923
chrX	15872770	15873270
chr5	102594076	102594576
chr4	120987825	120988325
chr2	118571877	118572377
chr15	59041908	59042408
chr3	185826768	185827268
chr14	99947114	99947614
chr5	759149	759649
chr5	35617690	35618190
chr11	73490370	73490870
chr2	242295257	242295757
chr4	17812183	17812683
chr8	66556653	66557153
chr17	39942903	39943403
chr11	65686526	65687026
chr19	36135185	36135685
chr1	67390363	67390863
chr7	135661965	135662465
chr6	80713998	80714498
chr18	12377142	12377642
chr18	29672245	29672745
chr2	198380421	198380921
chr20	42219323	42219823
chr15	100273473	100273973
chr9	35732242	35732742
chr17	27139319	27139819
chr2	128784738	128785238
chr3	136580692	136581192
chr11	73309020	73309520
chr11	67572966	67573466
chr7	149535180	149535680
chr12	98987170	98987670
chr16	87984401	87984901
chr19	46195539	46196039
chr20	54967215	54967715
chr19	6424765	6425265
chr5	114880249	114880749
chr6	160183165	160183665
chr1	10092605	10093105
chrX	13670963	13671463
chr22	42486664	42487164
chr10	121485189	121485689
chr13	73301619	73302119
chr7	82792047	82792547
chr12	56211443	56211943
chr16	28935896	28936396
chr20	45317992	45318492
chr7	65337864	65338364
chr6	117923495	117923995
chr20	62169006	62169506
chr9	4792537	4793037
chr15	89877881	89878381
chr9	117349597	117350097
chr20	23338699	23339199
chr11	30344368	30344868
chr11	57424896	57425396
chr19	36545049	36545549
chr12	95867590	95868090
chr4	174255467	174255967
chr17	40306883	40307383
chr17	48943707	48944207
chr11	22851272	22851772
chr2	58273591	58274091
chr19	45393804	45394304
chr20	30181083	30181583
chr9	125702896	125703396
chr14	21737647	21738147
chr3	42641746	42642246
chr11	74659957	74660457
chr12	14956299	14956799
chr11	73472031	73472531
chr16	22201673	22202173
chr9	74919954	74920454
chr4	166033839	166034339
chr1	3773671	3774171
chr20	25677317	25677817
chr19	39390118	39390618
chr11	126138663	126139163
chr2	96931626	96932126
chr2	25264724	25265224
chr16	14013649	14014149
chr14	58764716	58765216
chr13	76123321	76123821
chr19	8008469	8008969
chr11	10830322	10830822
chr15	42867382	42867882
chr15	23034307	23034807
chr20	49347499	49347999
chr19	55850872	55851372
chr2	26101263	26101763
chrX	153193625	153194125
chr7	134001562	134002062
chr17	43394435	43394935
chr6	144416626	144417126
chr3	16306390	16306890
chr4	68411068	68411568
chr10	27792901	27793401
chr20	30160637	30161137
chr4	39528954	39529454
chr1	197170300	197170800
chr16	15982364	15982864
chr3	133292067	133292567
chr9	103173823	103174323
chr10	99258267	99258767
chr8	19674556	19675056
chr3	127842492	127842992
chr11	31531024	31531524
chr17	26662388	26662888
chr10	103578150	103578650
chr9	5093029	5093529
chr1	144932235	144932735
chr7	108166531	108167031
chr1	8021361	8021861
chr2	232329026	232329526
chr4	3957292	3957792
chr5	44808689	44809189
chr1	111506397	111506897
chr19	45681398	45681898
chr9	80911711	80912211
chr7	4784630	4785130
chr8	87354471	87354971
chr6	163148613	163149113
chr14	77787469	77787969
chr17	73285349	73285849
chr1	24969331	24969831
chr8	93978134	93978634
chr11	64684612	64685112
chr1	235667661	235668161
chr16	84047742	84048242
chr3	32147734	32148234
chr2	3605805	3606305
chr16	27214955	27215455
chr2	84743263	84743763
chr4	3957030	3957530
chr12	82752348	82752848
chr1	167189678	167190178
chr18	14132298	14132798
chr18	9475115	9475615
chr10	121356463	121356963
chr2	112812416	112812916
chr10	104473980	104474480
chr3	15642920	15643420
chr10	129845541	129846041
chr7	135194719	135195219
chr19	36422317	36422817
chr2	178077047	178077547
chr1	163291394	163291894
chr10	134350746	134351246
chr13	60737924	60738424
chr9	123476649	123477149
chr15	102264441	102264941
chr5	148737235	148737735
chr18	158200	158700
chr4	83295091	83295591
chr14	45431025	45431525
chr2	120517015	120517515
chr17	80416235	80416735
chr8	103251384	103251884
chr2	32390570	32391070
chr12	6961415	6961915
chr12	133656518	133657018
chr6	2765301	2765801
chr19	40791215	40791715
chr7	27702433	27702933
chr1	155278250	155278750
chr7	43622243	43622743
chr7	111846285	111846785
chr8	681049	681549
chr1	247373975	247374475
chr12	120105388	120105888
chr2	44394930	44395430
chr7	100209825	100210325
chr20	32274108	32274608
chr6	97372278	97372778
chr5	143550092	143550592
chr14	102990866	102991366
chr1	183604713	183605213
chr5	86708556	86709056
chr13	52157857	52158357
chr8	79578048	79578548
chr5	82373021	82373521
chr16	67595824	67596324
chr4	10020398	10020898
chr10	45454839	45455339
chr17	47492078	47492578
chr6	53412662	53413162
chr19	48018290	48018790
chr16	56485101	56485601
chr2	120124278	120124778
chr22	38054290	38054790
chr12	46384308	46384808
chr2	122512827	122513327
chr4	119199524	119200024
chr2	27008535	27009035
chr16	1393025	1393525
chr2	220252889	220253389
chr7	138144745	138145245
chr11	124823726	124824226
chr8	9911539	9912039
chr12	31811982	31812482
chr15	59063134	59063634
chr20	37590683	37591183
chr16	30441267	30441767
chr5	40835176	40835676
chr9	106856054	106856554
chr1	16543787	16544287
chr20	33264742	33265242
chr4	174291706	174292206
chr15	41099519	41100019
chr20	30326728	30327228
chr1	150601914	150602414
chr9	99212138	99212638
chr17	57232678	57233178
chr16	2205276	2205776
chr4	83821547	83822047
chr19	3572550	3573050
chr16	14580677	14581177
chr10	977528	978028
chr11	57078740	57079240
chr7	150754898	150755398
chr15	91260238	91260738
chr2	20251261	20251761
chr14	31495483	31495983
chr19	16222237	16222737
chr20	17949364	17949864
chr2	70141812	70142312
chr11	57508585	57509085
chr22	37172240	37172740
chr4	152020345	152020845
chr11	67275498	67275998
chr16	88729361	88729861
chr6	150390121	150390621
chr9	95857625	95858125
chr4	48832792	48833292
chr7	65215711	65216211
chr2	201390551	201391051
chr1	211752401	211752901
chr2	32288438	32288938
chr10	13203210	13203710
chr19	8590463	8590963
chr1	7843834	7844334
chr11	18655788	18656288
chr6	32163262	32163762
chr3	114865962	114866462
chr2	179315711	179316211
chr1	147071416	147071916
chr15	41624618	41625118
chr19	42900989	42901489
chr10	81205373	81205873
chr1	76251607	76252107
chr2	61991277	61991777
chr6	88299525	88300025
chr14	64009930	64010430
chr5	74807362	74807862
chr16	46865197	46865697
chr6	80246927	80247427
chr7	43908932	43909432
chr3	120314863	120315363
chr12	54673299	54673799
chr19	55972857	55973357
chr10	38265359	38265859
chr1	43232618	43233118
chr7	87849128	87849628
chr2	96874431	96874931
chr11	64546025	64546525
chr2	61292638	61293138
chr3	197281498	197281998
chr1	150669527	150670027
chr16	57219815	57220315
chr19	11485458	11485958
chr2	223725443	223725943
chr5	179125551	179126051
chr11	82611308	82611808
chr11	118927815	118928315
chr1	236445149	236445649
chr1	62902049	62902549
chr20	56963968	56964468
chr15	35261783	35262283
chr7	75157277	75157777
chr13	73632757	73633257
chr1	93645829	93646329
chr16	25042770	25043270
chr7	86781524	86782024
chr7	64498283	64498783
chr15	99791289	99791789
chr4	129208924	129209424
chr18	19320376	19320876
chr2	110371428	110371928
chr19	45394005	45394505
chr12	32831903	32832403
chr6	30034524	30035024
chr2	44395404	44395904
chr22	41032562	41033062
chr4	177240761	177241261
chr8	66546278	66546778
chr19	14640060	14640560
chr3	101394911	101395411
chr3	28282745	28283245
chr16	77756101	77756601
chr13	25875433	25875933
chr18	19284563	19285063
chr8	55014331	55014831
chr5	145562013	145562513
chr17	40761298	40761798
chr9	79792123	79792623
chr3	9438456	9438956
chr12	7055359	7055859
chr13	44715906	44716406
chr5	1161304	1161804
chr4	7044617	7045117
chr2	61698102	61698602
chr13	52158028	52158528
chr6	86303432	86303932
chr5	68389480	68389980
chr2	9771044	9771544
chr9	139780593	139781093
chr10	101380265	101380765
chr3	97540556	97541056
chr11	66383721	66384221
chr8	11719980	11720480
chr10	74033381	74033881
chr14	35008683	35009183
chr7	30544341	30544841
chr1	38397326	38397826
chr6	117996299	117996799
chr9	100818555	100819055
chr13	31191610	31192110
chr19	54663403	54663903
chr20	44509533	44510033
chr14	51706617	51707117
chr3	146187028	146187528
chr20	34359941	34360441
chr1	100715211	100715711
chr13	41706719	41707219
chr5	10353622	10354122
chr1	6052339	6052839
chr3	186288117	186288617
chr4	113152611	113153111
chr20	52824121	52824621
chr4	99064460	99064960
chr20	21106399	21106899
chr1	36689717	36690217
chr22	46692406	46692906
chr7	64023311	64023811
chr16	4743291	4743791
chr4	169931284	169931784
chr8	11486154	11486654
chr2	203499357	203499857
chr1	46598471	46598971
chr12	57039614	57040114
chr8	118532615	118533115
chr2	122494327	122494827
chr11	47198269	47198769
chr10	97320953	97321453
chr20	34330220	34330720
chr4	17578751	17579251
chr12	6862600	6863100
chr14	54863398	54863898
chr13	77565959	77566459
chr16	72698697	72699197
chr10	120514407	120514907
chr9	115141977	115142477
chr19	49217421	49217921
chr1	114354831	114355331
chr15	64455208	64455708
chr8	86132483	86132983
chr16	2932513	2933013
chr7	91808139	91808639
chr20	32398808	32399308
chr6	5003692	5004192
chr20	52532286	52532786
chr9	91933459	91933959
chr3	180707344	180707844
chr6	99395763	99396263
chr3	100211065	100211565
chr14	61747955	61748455
chr8	93977621	93978121
chr7	106809069	106809569
chr12	53574117	53574617
chr20	26189795	26190295
chr7	55145401	55145901
chr1	202317495	202317995
chr16	3450866	3451366
chr8	95565536	95566036
chr19	47164283	47164783
chr5	61699570	61700070
chr8	77912223	77912723
chr6	119214992	119215492
chr12	68725982	68726482
chr11	62608889	62609389
chr11	64902405	64902905
chr19	28284630	28285130
chr3	40494546	40495046
chr5	41925080	41925580
chr19	14228445	14228945
chr20	42939662	42940162
chr16	69344901	69345401
chrX	77359373	77359873
chr13	103248993	103249493
chr1	156736887	156737387
chr15	90931025	90931525
chrX	3732837	3733337
chr20	37101036	37101536
chr2	227700462	227700962
chr19	54605834	54606334
chr19	40854142	40854642
chr21	44394150	44394650
chr15	72564845	72565345
chr8	117778421	117778921
chr15	100882084	100882584
chr17	61920101	61920601
chr20	47894786	47895286
chr12	82752054	82752554
chr19	51014289	51014789
chr6	74230690	74231190
chr6	167412476	167412976
chr9	35603999	35604499
chr2	238969330	238969830
chr11	47788843	47789343
chr15	75744071	75744571
chr12	25403749	25404249
chrX	47509899	47510399
chr1	154955461	154955961
chr16	639668	640168
chr9	38392400	38392900
chr10	103113571	103114071
chr14	65006900	65007400
chr2	219270884	219271384
chr1	25071387	25071887
chr11	85780048	85780548
chr9	100459416	100459916
chr8	120885696	120886196
chr4	103749073	103749573
chr3	136471246	136471746
chr6	52535628	52536128
chr19	42747082	42747582
chr14	60558428	60558928
chr7	100209497	100209997
chr19	14247349	14247849
chr3	88108106	88108606
chr3	42632019	42632519
chr7	111846391	111846891
chr17	14204015	14204515
chr12	22777776	22778276
chr6	72130378	72130878
chr8	11665642	11666142
chr4	185570458	185570958
chr16	84150260	84150760
chr7	108210016	108210516
chr3	160283220	160283720
chr3	14166186	14166686
chr15	44719057	44719557
chr10	105677996	105678496
chr1	36614982	36615482
chr1	236958247	236958747
chr2	8723868	8724368
chr1	247171162	247171662
chr19	48706971	48707471
chr6	101329017	101329517
chr11	68890143	68890643
chr3	129830184	129830684
chr3	112280985	112281485
chr14	100070474	100070974
chr1	28052083	28052583
chr13	73355958	73356458
chr1	235291973	235292473
chr7	123174936	123175436
chr12	80328730	80329230
chr2	68694307	68694807
chr10	104677664	104678164
chr5	156569659	156570159
chr20	44622035	44622535
chr1	23670718	23671218
chr15	83478036	83478536
chr11	18034418	18034918
chr7	142985130	142985630
chr4	9154532	9155032
chr4	141294455	141294955
chr3	101443494	101443994
chr1	67895937	67896437
chr5	114961617	114962117
chr12	99038686	99039186
chr3	183602474	183602974
chr19	49956514	49957014
chr11	82997212	82997712
chr5	154134409	154134909
chr9	71719978	71720478
chr6	108279261	108279761
chr8	126442124	126442624
chr4	78077659	78078159
chr2	48667583	48668083
chr4	152681996	152682496
chr19	33667878	33668378
chr1	150601488	150601988
chr5	133841762	133842262
chr3	48130216	48130716
chr2	10952733	10953233
chr17	47755236	47755736
chr2	7171703	7172203
chr19	18632827	18633327
chr16	31105952	31106452
chr12	125534005	125534505
chr17	46125314	46125814
chr20	58515191	58515691
chr7	99698915	99699415
chr19	4402181	4402681
chr22	46431554	46432054
chr19	48995957	48996457
chr5	178986387	178986887
chr3	155588084	155588584
chr2	62932279	62932779
chr15	93447273	93447773
chr12	102224546	102225046
chr7	35076909	35077409
chr3	27525817	27526317
chr12	108908679	108909179
chr1	33896420	33896920
chr17	20946451	20946951
chr1	39325233	39325733
chr3	128399388	128399888
chr11	76091938	76092438
chr9	20683957	20684457
chr11	3443905	3444405
chr12	42538392	42538892
chr11	128392028	128392528
chr3	52570280	52570780
chr1	21934203	21934703
chr6	79944197	79944697
chr7	91388500	91389000
chr4	57301548	57302048
chr7	6543441	6543941
chr2	73460224	73460724
chr20	3748302	3748802
chr10	1095043	1095543
chr1	31769564	31770064
chr1	40506030	40506530
chr2	160143028	160143528
chr4	99182133	99182633
chrX	153606978	153607478
chr9	99180695	99181195
chr8	82633408	82633908
chr1	113932702	113933202
chr6	86352931	86353431
chr9	88742211	88742711
chr3	184279211	184279711
chr17	74260962	74261462
chrX	14891161	14891661
chr14	24583623	24584123
chr20	20693305	20693805
chr1	89149531	89150031
chr1	173446011	173446511
chr16	11891028	11891528
chr9	95055831	95056331
chr19	8454885	8455385
chr19	50528510	50529010
chr7	64254471	64254971
chr10	14879945	14880445
chr8	57124004	57124504
chr19	19030125	19030625
chr7	55086417	55086917
chr20	54933657	54934157
chr6	41040572	41041072
chr4	120375728	120376228
chr5	149340004	149340504
chr5	108745547	108746047
chr2	32852875	32853375
chr6	166796327	166796827
chr10	131908875	131909375
chr14	77923789	77924289
chr2	191184437	191184937
chr18	12947662	12948162
chr18	48723987	48724487
chr10	3215118	3215618
chr2	85581454	85581954
chr2	62932487	62932987
chr8	90996205	90996705
chr19	38826108	38826608
chr18	60382105	60382605
chr11	78285660	78286160
chr12	46384249	46384749
chr3	179322294	179322794
chr10	75936239	75936739
chr12	120426484	120426984
chr14	34931358	34931858
chr12	58087569	58088069
chr3	51975860	51976360
chr18	77439174	77439674
chr14	50334858	50335358
chr10	43048100	43048600
chr6	111136470	111136970
chr3	129158707	129159207
chr11	19138384	19138884
chr5	142149632	142150132
chr19	55677809	55678309
chr2	25194635	25195135
chr11	66405714	66406214
chr6	86388324	86388824
chr2	55844586	55845086
chr8	9008015	9008515
chr20	5093398	5093898
chr17	26645826	26646326
chr20	42839440	42839940
chr7	140179044	140179544
chr4	99916325	99916825
chr1	28573561	28574061
chr11	13298860	13299360
chr1	154155555	154156055
chr3	45730562	45731062
chr16	30538535	30539035
chr14	53258052	53258552
chr17	53828104	53828604
chr8	125486786	125487286
chr2	46843978	46844478
chr8	56986932	56987432
chr7	158649000	158649500
chr1	166808362	166808862
chr4	159131338	159131838
chr18	65183874	65184374
chr12	10364795	10365295
chr2	42067793	42068293
chr9	95858072	95858572
chr11	94822733	94823233
chr4	11430459	11430959
chr19	44172779	44173279
chr6	10404514	10405014
chr10	105677771	105678271
chr3	31573760	31574260
chr10	60027578	60028078
chr5	43515048	43515548
chr22	29999222	29999722
chr20	43150512	43151012
chr2	122406937	122407437
chr3	9791380	9791880
chr9	97021306	97021806
chr12	131356162	131356662
chr20	25371397	25371897
chr6	38670732	38671232
chr15	40074504	40075004
chr10	85898974	85899474
chr9	129676756	129677256
chr10	70883592	70884092
chr13	34116656	34117156
chr4	185655137	185655637
chr20	10015425	10015925
chr7	33168871	33169371
chr6	146864551	146865051
chr1	241803462	241803962
chr21	27107073	27107573
chr2	208634527	208635027
chr1	10458708	10459208
chr10	1094756	1095256
chr1	59012235	59012735
chr1	171282973	171283473
chr4	76598445	76598945
chr5	151150870	151151370
chr11	59436446	59436946
chr7	65540504	65541004
chr2	178937305	178937805
chr5	162887261	162887761
chr5	102455727	102456227
chr12	104323776	104324276
chr2	64371450	64371950
chr9	128469290	128469790
chr3	121468421	121468921
chr9	86536175	86536675
chr20	26188626	26189126
chr11	71791472	71791972
chr9	131038054	131038554
chr12	123868209	123868709
chr15	44084119	44084619
chr9	91925553	91926053
chr7	120590432	120590932
chr9	15422492	15422992
chr15	65127813	65128313
chr6	10747638	10748138
chr1	60280093	60280593
chr11	32605020	32605520
chr2	136288676	136289176
chr8	11141737	11142237
chr1	6673398	6673898
chr20	50366643	50367143
chr9	74526147	74526647
chr10	124133876	124134376
chr2	65283162	65283662
chr14	50087183	50087683
chr1	47779694	47780194
chr19	33462827	33463327
chr10	70480608	70481108
chr7	89975706	89976206
chr7	72971286	72971786
chr14	35515245	35515745
chr2	148778227	148778727
chr7	140714569	140715069
chr2	133173855	133174355
chr8	101734387	101734887
chr10	71930120	71930620
chr13	113540069	113540569
chr11	17297884	17298384
chr19	49140633	49141133
chr16	50058792	50059292
chr8	11711323	11711823
chr3	43810954	43811454
chr19	9945643	9946143
chr19	50179952	50180452
chr1	249132058	249132558
chr19	41256316	41256816
chr17	43128711	43129211
chr12	53845501	53846001
chr7	985185	985685
chr11	86748675	86749175
chr4	128982074	128982574
chr11	34460153	34460653
chr2	198669001	198669501
chr12	50505476	50505976
chr17	12921156	12921656
chr11	18417409	18417909
chr2	145089945	145090445
chr2	99757549	99758049
chr9	125667514	125668014
chr2	86421947	86422447
chr16	2273225	2273725
chr15	80215917	80216417
chr7	93633472	93633972
chr16	54962977	54963477
chr11	75525876	75526376
chrX	106871345	106871845
chr21	38639584	38640084
chr3	66271061	66271561
chr20	13619442	13619942
chr17	57784679	57785179
chr13	22177767	22178267
chr1	214776231	214776731
chr11	67374047	67374547
chr16	30076686	30077186
chr6	107349168	107349668
chr9	2014926	2015426
chr9	108210058	108210558
chr17	54911112	54911612
chr11	1410708	1411208
chr10	99446802	99447302
chr3	185303619	185304119
chr5	128430059	128430559
chr7	99070176	99070676
chr13	37633641	37634141
chr9	137029797	137030297
chr4	1857779	1858279
chr16	85722421	85722921
chr14	24610594	24611094
chr19	47164465	47164965
chr7	16685181	16685681
chr15	85143926	85144426
chr5	14664454	14664954
chr7	128379062	128379562
chr2	190648892	190649392
chr2	9695804	9696304
chr20	30945721	30946221
chr2	11884109	11884609
chr19	50832316	50832816
chr3	160167358	160167858
chr2	264505	265005
chr7	35043309	35043809
chr7	26904052	26904552
chr2	170550751	170551251
chr10	43133479	43133979
chr20	48770141	48770641
chr3	17784096	17784596
chr1	174128345	174128845
chr3	122102755	122103255
chr4	47916441	47916941
chr19	50143552	50144052
chr19	58912420	58912920
chr22	19109846	19110346
chr2	24299567	24300067
chr14	77787077	77787577
chr8	17779974	17780474
chr15	56757098	56757598
chr7	64466883	64467383
chr12	133706783	133707283
chr19	38865036	38865536
chr11	130786209	130786709
chr4	113557961	113558461
chr1	33592759	33593259
chr16	23568555	23569055
chr1	155579632	155580132
chr22	21271317	21271817
chr3	129612478	129612978
chr17	17875628	17876128
chrX	151999132	151999632
chr2	27593004	27593504
chr11	74459600	74460100
chr22	41985813	41986313
chr17	47270040	47270540
chr3	183892273	183892773
chr11	94226849	94227349
chr7	134896150	134896650
chr9	37485567	37486067
chr4	120221621	120222121
chr1	247241880	247242380
chr13	52027070	52027570
chr17	46018604	46019104
chr10	38299247	38299747
chr14	24616312	24616812
chr13	27131461	27131961
chr1	32859928	32860428
chr10	22292420	22292920
chr9	36190530	36191030
chr11	62389305	62389805
chr19	56651937	56652437
chr11	2933705	2934205
chr17	46048087	46048587
chr10	32048994	32049494
chr10	75757530	75758030
chr6	46097444	46097944
chr6	18155324	18155824
chr14	73925135	73925635
chr11	66313368	66313868
chr19	36119539	36120039
chr11	27494189	27494689
chr13	29292925	29293425
chr7	123174446	123174946
chr17	38136621	38137121
chr15	91537719	91538219
chr4	8200706	8201206
chr19	55628919	55629419
chr1	46152584	46153084
chr8	87520730	87521230
chr9	114393296	114393796
chr6	20212537	20213037
chr16	23160649	23161149
chr3	133524356	133524856
chr20	47663076	47663576
chr1	74663648	74664148
chr11	518473	518973
chr20	35233773	35234273
chr5	87436985	87437485
chr12	4430031	4430531
chr17	81009537	81010037
chr22	38240177	38240677
chr5	87564521	87565021
chrX	80065255	80065755
chr8	74790922	74791422
chr15	42066391	42066891
chr3	140660391	140660891
chr9	88969167	88969667
chr3	19988305	19988805
chr6	71122869	71123369
chr4	83933943	83934443
chr12	49716585	49717085
chr2	175113132	175113632
chr1	235530421	235530921
chr1	45956826	45957326
chr2	219575322	219575822
chr10	105881486	105881986
chr16	29801675	29802175
chr20	55043334	55043834
chr22	38092662	38093162
chr13	20207448	20207948
chr4	25378503	25379003
chr2	187350656	187351156
chr20	52765570	52766070
chr16	11836520	11837020
chr1	154192913	154193413
chr14	90849455	90849955
chr20	13975834	13976334
chr1	16532941	16533441
chr5	68462624	68463124
chr10	105156106	105156606
chr7	144532890	144533390
chr19	50269863	50270363
chr14	54976255	54976755
chr1	181998598	181999098
chr1	87379934	87380434
chr13	60970306	60970806
chr1	54411295	54411795
chr21	34914994	34915494
chrX	107334674	107335174
chr2	166810131	166810631
chr12	54674140	54674640
chr2	220071179	220071679
chr10	88159558	88160058
chr9	131654615	131655115
chr11	28129570	28130070
chr19	45505061	45505561
chr8	90914494	90914994
chr4	53588334	53588834
chr5	56469504	56470004
chr11	125439023	125439523
chr2	162016596	162017096
chr16	4666125	4666625
chr11	86666247	86666747
chr13	53024589	53025089
chr22	31503470	31503970
chr16	23193643	23194143
chr14	32545808	32546308
chr10	80062893	80063393
chr11	64577908	64578408
chr3	140950310	140950810
chr8	20054510	20055010
chr1	154946728	154947228
chr11	85565871	85566371
chr14	90798162	90798662
chr19	37808427	37808927
chr11	6633325	6633825
chr4	149363532	149364032
chr16	84538150	84538650
chr16	57334357	57334857
chr6	108582121	108582621
chr12	33049856	33050356
chr17	52977855	52978355
chr19	36248680	36249180
chr7	100270855	100271355
chr17	26972025	26972525
chr4	20701732	20702232
chr3	47020918	47021418
chr14	23790353	23790853
chr3	172428725	172429225
chr15	86337959	86338459
chr2	242294681	242295181
chr6	64282119	64282619
chr7	66205298	66205798
chr11	31391078	31391578
chr20	39946143	39946643
chr19	45681599	45682099
chr9	132404340	132404840
chr9	101867089	101867589
chr19	45873681	45874181
chr14	45603534	45604034
chr19	58816403	58816903
chr13	49106680	49107180
chr12	64797842	64798342
chr1	156307906	156308406
chr1	244624456	244624956
chr5	10441683	10442183
chr1	117602569	117603069
chr3	138312961	138313461
chr3	28390376	28390876
chr10	64892753	64893253
chr16	30825592	30826092
chr1	109968923	109969423
chr2	98280369	98280869
chr7	73588241	73588741
chr3	122920423	122920923
chr9	115095824	115096324
chr7	105925307	105925807
chr6	110012159	110012659
chr19	33165923	33166423
chr4	3294277	3294777
chr4	130014521	130015021
chr16	2955270	2955770
chr13	27745863	27746363
chr16	103468	103968
chr4	47487040	47487540
chr14	58764924	58765424
chr1	151118976	151119476
chr3	48229795	48230295
chr7	89348234	89348734
chr4	109541349	109541849
chr3	100120050	100120550
chr7	91763897	91764397
chr1	26632950	26633450
chr3	148804121	148804621
chr19	40948923	40949423
chr6	170893544	170894044
chr11	61891042	61891542
chr6	84569071	84569571
chr14	39901902	39902402
chr8	134309366	134309866
chr13	31736288	31736788
chr19	46498276	46498776
chr18	77793898	77794398
chr16	89237755	89238255
chr16	3053816	3054316
chr1	162530975	162531475
chr1	17240213	17240713
chr20	749014	749514
chr16	22201786	22202286
chr2	33202155	33202655
chr6	112408514	112409014
chr17	73936970	73937470
chr4	146101555	146102055
chr12	27091077	27091577
chr22	42228701	42229201
chr7	89699495	89699995
chr8	144691619	144692119
chr7	92219479	92219979
chr20	36322119	36322619
chr5	118324086	118324586
chr1	249200591	249201091
chr4	184425495	184425995
chr20	30198296	30198796
chr3	20227534	20228034
chr2	192542500	192543000
chr5	130506293	130506793
chr1	38325138	38325638
chr3	14989747	14990247
chr19	51870757	51871257
chr16	74808514	74809014
chr6	119256048	119256548
chr3	101443194	101443694
chr17	29814575	29815075
chr3	128745796	128746296
chr1	46216146	46216646
chr12	49463563	49464063
chr19	36193149	36193649
chr1	147071556	147072056
chr11	122933057	122933557
chr6	49430719	49431219
chr2	18741749	18742249
chr12	77157541	77158041
chr15	65903346	65903846
chr16	4784152	4784652
chr5	89825252	89825752
chr9	115983427	115983927
chr17	53499160	53499660
chr16	28857564	28858064
chr9	130830076	130830576
chr8	10573540	10574040
chr2	47572049	47572549
chr1	11322544	11323044
chr12	49245781	49246281
chr1	213188928	213189428
chr12	110011257	110011757
chr12	56693996	56694496
chr6	135375752	135376252
chr19	17580861	17581361
chr7	7221890	7222390
chr22	51021201	51021701
chr16	2264866	2265366
chr8	130951857	130952357
chr8	29412865	29413365
chr15	44829039	44829539
chr3	111393174	111393674
chr12	108154758	108155258
chr6	11232674	11233174
chr10	60028608	60029108
chr14	23770805	23771305
chr3	125314241	125314741
chr3	132441083	132441583
chr3	136471058	136471558
chr1	166845412	166845912
chr7	72936437	72936937
chr1	70686809	70687309
chr3	51422311	51422811
chr17	61818986	61819486
chr13	52586155	52586655
chr2	219134880	219135380
chr10	74856478	74856978
chr20	50072904	50073404
chr14	102414294	102414794
chr12	6960988	6961488
chr3	127770873	127771373
chr16	4852727	4853227
chr19	51611485	51611985
chr5	71604023	71604523
chr9	126030774	126031274
chr8	28479943	28480443
chr1	44172849	44173349
chr19	14062891	14063391
chr7	100608814	100609314
chr14	90979938	90980438
chr1	247095011	247095511
chr4	76649469	76649969
chr19	46220462	46220962
chr10	44820464	44820964
chr4	89513275	89513775
chr3	156892672	156893172
chr1	38157777	38158277
chr3	42845801	42846301
chr19	36705679	36706179
chr19	46366263	46366763
chr6	105307578	105308078
chr3	130612635	130613135
chr10	38146401	38146901
chr15	55489008	55489508
chr9	6681083	6681583
chr20	32581196	32581696
chr14	50329444	50329944
chr1	179923574	179924074
chr1	32757332	32757832
chr9	88708634	88709134
chr2	98262166	98262666
chr9	134248666	134249166
chr16	30389436	30389936
chr14	36278224	36278724
chr9	140473149	140473649
chr18	71815387	71815887
chr3	141456709	141457209
chr3	27410714	27411214
chr17	73150507	73151007
chr2	128785531	128786031
chr21	30365030	30365530
chr1	155197164	155197664
chr16	87526494	87526994
chr6	97345554	97346054
chr12	123717519	123718019
chr3	50396799	50397299
chr12	118810596	118811096
chr20	39969231	39969731
chr1	31538408	31538908
chr5	1385782	1386282
chr15	93374937	93375437
chr3	85007845	85008345
chr12	122985333	122985833
chr12	2113438	2113938
chr6	53516718	53517218
chr11	133826676	133827176
chr12	50505624	50506124
chr19	42829399	42829899
chr3	33840319	33840819
chr14	64854649	64855149
chr7	48074775	48075275
chr1	26560271	26560771
chr16	71323152	71323652
chr17	7518254	7518754
chr10	24772602	24773102
chr19	8943162	8943662
chr7	36429036	36429536
chr11	12131754	12132254
chr3	101395851	101396351
chr4	102268577	102269077
chr7	100887857	100888357
chr2	64067789	64068289
chr3	101292665	101293165
chr14	23388341	23388841
chr20	56293442	56293942
chr9	127951944	127952444
chr2	210867019	210867519
chr14	93260346	93260846
chr20	49039635	49040135
chr5	110848132	110848632
chr11	108535409	108535909
chr9	37465574	37466074
chr6	24402824	24403324
chr3	152878915	152879415
chr17	45973024	45973524
chr19	42746731	42747231
chr2	136633848	136634348
chr2	91847775	91848275
chr2	27712421	27712921
chr10	103892450	103892950
chr9	131397506	131398006
chr13	103451154	103451654
chr4	71553744	71554244
chr15	43802843	43803343
chr15	42565464	42565964
chr2	97481695	97482195
chr7	56019305	56019805
chr11	11643443	11643943
chr14	90420958	90421458
chr3	9690804	9691304
chrX	46696033	46696533
chr11	117198267	117198767
chr20	35504222	35504722
chr3	25706208	25706708
chr5	5494683	5495183
chr5	32444611	32445111
chr19	36239058	36239558
chr5	137878806	137879306
chr11	114271003	114271503
chr9	128003454	128003954
chr11	96122838	96123338
chr6	33422020	33422520
chr7	855943	856443
chr17	73851372	73851872
chr3	107941125	107941625
chr2	42588434	42588934
chr15	50716211	50716711
chr2	68479580	68480080
chr17	55162202	55162702
chr19	1490743	1491243
chr10	50746881	50747381
chr6	155055071	155055571
chr4	331230	331730
chr1	12079260	12079760
chr19	41076428	41076928
chr17	26898369	26898869
chr1	119683097	119683597
chr15	78799557	78800057
chr1	9970133	9970633
chr2	208030707	208031207
chr5	162932329	162932829
chr16	2581788	2582288
chr7	151216939	151217439
chr5	98108983	98109483
chr17	67323160	67323660
chr2	232572824	232573324
chr7	150924150	150924650
chr10	131909225	131909725
chr2	132250229	132250729
chr3	44379664	44380164
chr9	131798541	131799041
chr17	34136144	34136644
chr19	41283769	41284269
chr1	222817323	222817823
chr1	207226247	207226747
chr13	48575262	48575762
chr2	121010081	121010581
chr15	25683956	25684456
chr9	135116466	135116966
chr3	130745440	130745940
chr11	19734096	19734596
chrX	49125513	49126013
chr5	118604118	118604618
chr15	81281950	81282450
chr19	39832677	39833177
chr1	165567263	165567763
chr12	75905275	75905775
chr1	23694619	23695119
chr19	39832438	39832938
chr7	149321589	149322089
chr5	6766573	6767073
chr9	95640200	95640700
chr21	43916238	43916738
chr11	34937806	34938306
chr8	102217813	102218313
chr2	25015985	25016485
chr11	22647169	22647669
chr14	24615732	24616232
chr20	32950801	32951301
chr15	31618550	31619050
chr12	112563027	112563527
chr9	137335167	137335667
chr9	123883763	123884263
chr6	42531423	42531923
chr1	10270274	10270774
chr6	112194491	112194991
chr20	33543431	33543931
chr14	24911769	24912269
chr12	21654376	21654876
chr15	85259464	85259964
chr7	105516848	105517348
chr20	57617689	57618189
chr17	59940703	59941203
chr6	131949142	131949642
chr10	16478673	16479173
chr19	5680390	5680890
chr3	101497734	101498234
chr19	23433014	23433514
chr20	48782530	48783030
chr13	28194537	28195037
chr1	1051414	1051914
chr12	120875524	120876024
chr14	50778751	50779251
chr6	146285323	146285823
chr17	80656436	80656936
chr6	160210588	160211088
chr12	44152416	44152916
chr19	47852222	47852722
chr11	72145380	72145880
chr9	112078561	112079061
chr2	61765295	61765795
chr17	41400769	41401269
chr19	16770801	16771301
chr17	66031281	66031781
chr7	44887481	44887981
chr10	5931665	5932165
chr10	14995993	14996493
chr5	94982288	94982788
chr1	33430274	33430774
chr2	216176450	216176950
chr5	14011538	14012038
chr20	32031426	32031926
chr22	17565492	17565992
chr14	67707708	67708208
chrX	43513959	43514459
chr1	12040083	12040583
chr7	99063575	99064075
chr1	186649217	186649717
chr3	61236938	61237438
chr10	62537840	62538340
chr7	44887649	44888149
chr1	230202587	230203087
chr17	25659749	25660249
chr5	40798163	40798663
chr1	144533485	144533985
chr4	84406137	84406637
chr2	179344822	179345322
chr19	50372572	50373072
chr4	56261796	56262296
chr20	62496216	62496716
chr10	126107364	126107864
chr3	49823829	49824329
chr11	64008662	64009162
chrX	15353537	15354037
chr9	135905704	135906204
chr2	61765612	61766112
chr4	699178	699678
chr19	30335640	30336140
chr19	30302530	30303030
chr3	8485977	8486477
chr12	53399750	53400250
chr2	198364695	198365195
chrX	119763823	119764323
chr2	86668205	86668705
chr16	46917917	46918417
chr7	6144146	6144646
chr1	70671059	70671559
chr7	89783497	89783997
chr22	42466671	42467171
chr9	130743175	130743675
chr1	159837456	159837956
chr16	30934422	30934922
chr14	23564227	23564727
chr17	56494817	56495317
chr11	27384622	27385122
chr14	31889610	31890110
chr16	53164396	53164896
chr1	201924311	201924811
chr6	74363559	74364059
chr11	67273398	67273898
chr2	136288221	136288721
chr5	81046819	81047319
chr1	114447543	114448043
chr6	11093722	11094222
chr3	56590911	56591411
chr16	8891366	8891866
chr2	44395651	44396151
chr1	20987811	20988311
chr9	130497413	130497913
chr14	21979343	21979843
chr8	52811445	52811945
chr7	55322440	55322940
chr19	17186128	17186628
chr8	64080879	64081379
chr13	46626677	46627177
chr15	55700343	55700843
chr11	129939437	129939937
chr6	117001969	117002469
chr3	49977203	49977703
chr7	14030823	14031323
chr15	36871571	36872071
chr20	35374352	35374852
chr11	113184958	113185458
chr12	6579685	6580185
chr2	242447909	242448409
chr16	1661889	1662389
chr3	183735544	183736044
chr2	166650506	166651006
chr19	49133100	49133600
chr11	44087480	44087980
chr8	48873152	48873652
chr9	68726183	68726683
chr12	133613708	133614208
chr19	46273716	46274216
chr14	102605862	102606362
chr8	101734233	101734733
chr5	36242044	36242544
chr1	209957780	209958280
chr2	215674325	215674825
chr1	165737924	165738424
chrX	53024478	53024978
chr6	154664864	154665364
chr7	77649011	77649511
chr19	1905079	1905579
chr3	193310707	193311207
chr12	120524759	120525259
chr11	95522738	95523238
chr11	67573176	67573676
chr17	4634770	4635270
chr7	100875669	100876169
chr14	74353182	74353682
chr12	107380738	107381238
chr10	124739642	124740142
chr3	39447804	39448304
chr11	76571591	76572091
chr7	107531316	107531816
chr8	57906269	57906769
chr19	54693710	54694210
chr2	14772513	14773013
chr14	37130768	37131268
chrX	49047573	49048073
chr6	52859886	52860386
chr8	11561396	11561896
chr6	8102585	8103085
chr16	8768151	8768651
chr1	39338893	39339393
chr2	232645790	232646290
chr1	235491446	235491946
chr4	69215578	69216078
chr18	712461	712961
chr14	58711270	58711770
chr7	44058653	44059153
chr7	98740458	98740958
chr15	94774383	94774883
[truncated: 48,001 more rows]

## Sheet: S1B DAR Non-promoters
Chr	Start	End	Annotation	Detailed Annotation	Distance to TSS	Nearest PromoterID	Entrez ID	Nearest Unigene	Nearest Refseq	Nearest Ensembl	Gene Name	Gene Alias	Gene Description	Gene Type	N_003	N_005	N_006	T_002	T_003	T_005	T_006	Log2(Cancer/Normal)
chr18	10417132	10417632	Intergenic	Intergenic	-3015	NR_110775	101927350	Hs.572523	NR_110775	ENSG00000260913	LINC01254	-	long intergenic non-protein coding RNA 1254	ncRNA	17.61	36.08	6.42	1.04	3.01	2.94	2.66	-3.80613
chr14	93521822	93522322	intron (NM_001142593, intron 3 of 10)	intron (NM_001142593, intron 3 of 10)	-11725	NR_002808	319085	Hs.612888	NR_002808	ENSG00000258730	ITPK1-AS1	C14orf85|ITPK1-AS|ITPK1AS|NCRNA00203	ITPK1 antisense RNA 1	ncRNA	2.57	5.66	4.25	24.88	10.29	92.97	26.63	2.32363
chr11	63888382	63888882	intron (NM_014067, intron 3 of 10)	intron (NM_014067, intron 3 of 10)	17270	NM_013280	23769	Hs.584876	NM_013280	ENSG00000126500	FLRT1	SPG68	fibronectin leucine rich transmembrane protein 1	protein-coding	20.54	49.18	11.16	2.9	4.43	19.49	5.17	-2.97752
chr6	167637436	167637936	Intergenic	MER4C|LTR|ERV1	53605	NM_001145121	401285	Hs.691976	NM_001013683	ENSG00000166984	TCP10L2	bA517H2.3	t-complex 10-like 2	protein-coding	1.65	3.24	3.95	24.26	14.72	26.45	59.21	2.79104
chr6	86284924	86285424	intron (NM_001304479, intron 1 of 28)	Tigger6a|DNA|TcMar-Tigger	18700	NM_153816	57231	Hs.485871	NM_020468	ENSG00000135317	SNX14	RGS-PX2|SCAR20	sorting nexin 14	protein-coding	1.28	0.65	1.98	26.96	11.71	16.86	23.97	2.92384
chr8	124969805	124970305	intron (NM_001039112, intron 2 of 40)	intron (NM_001039112, intron 2 of 40)	82968	NR_040044	439941	Hs.683919	NM_001038706	ENSG00000181171	FER1L6-AS1	C8orf54	FER1L6 antisense RNA 1	ncRNA	1.65	5.5	2.77	12.23	25.16	43	54.82	2.74749
chr7	81107985	81108485	Intergenic	L1P2|LINE|L1	82900	NR_136264	105369146	Hs.730390	NR_136264		LOC105369146	-	uncharacterized LOC105369146	ncRNA	5.69	7.44	4.84	136.86	13.61	70.54	47.77	2.3857
chr18	2984817	2985317	intron (NM_014646, intron 1 of 19)	intron (NM_014646, intron 1 of 19)	26878	NM_014646	9663	Hs.132342	NM_014646	ENSG00000101577	LPIN2	-	lipin 2	protein-coding	2.38	3.56	2.57	31.31	25.96	30.94	25.53	2.73817
chr4	129494988	129495488	Intergenic	Intergenic	146067	NR_125882	100507487	Hs.549644	NR_125882	ENSG00000251432	LOC100507487	-	uncharacterized LOC100507487	ncRNA	3.3	2.1	1.09	55.16	20.26	12.22	11.43	2.65973
chr17	71794175	71794675	intron (NR_040020, intron 5 of 6)	intron (NR_040020, intron 5 of 6)	11464	NR_040020	400620	Hs.348644	NR_040020	ENSG00000234721	LINC02092	-	long intergenic non-protein coding RNA 2092	ncRNA	1.28	1.29	1.48	16.8	6.33	22.28	8.93	2.48515
chr18	3051798	3052298	Intergenic	AluSz6|SINE|Alu	-40103	NM_014646	9663	Hs.132342	NM_014646	ENSG00000101577	LPIN2	-	lipin 2	protein-coding	3.12	3.24	2.57	38.15	27.22	13.3	33.52	2.71401
chr1	232436909	232437409	Intergenic	Intergenic	214195	NM_020808	57568	Hs.745009	NM_020808	ENSG00000116991	SIPA1L2	SPAL2	signal induced proliferation associated 1 like 2	protein-coding	7.89	14.72	4.15	1.66	1.11	10.83	1.1	-2.62994
chr9	78664232	78664732	intron (NM_006200, intron 5 of 20)	intron (NM_006200, intron 5 of 20)	158922	NM_001190482	5125	Hs.368542	NM_006200	ENSG00000099139	PCSK5	PC5|PC6|PC6A|SPC6	proprotein convertase subtilisin/kexin type 5	protein-coding	1.1	2.59	3.56	38.36	16.46	68.53	48.56	3.20213
chr6	80318479	80318979	Intergenic	Intergenic	-22093	NM_031469	83699	Hs.302772	NM_031469	ENSG00000198478	SH3BGRL2	-	SH3 domain binding glutamate rich protein like 2	protein-coding	3.12	1.94	3.85	12.86	41.94	27.07	42.13	2.90651
chr8	56838630	56839130	intron (NM_002350, intron 1 of 12)	intron (NM_002350, intron 1 of 12)	46494	NM_002350	4067	Hs.491767	NM_002350	ENSG00000254087	LYN	JTK8|p53Lyn|p56Lyn	LYN proto-oncogene, Src family tyrosine kinase	protein-coding	1.47	2.27	0.99	21.15	20.42	33.72	16.13	3.12031
chr7	143131700	143132200	intron (NR_033897, intron 2 of 4)	intron (NR_033897, intron 2 of 4)	-8596	NM_177437	338398	Hs.688222	NM_177437	ENSG00000185899	TAS2R60	T2R56|T2R60	taste 2 receptor member 60	protein-coding	9.91	22.49	5.83	4.35	2.37	5.1	8.77	-2.33115
chr2	223660684	223661184	Intergenic	Intergenic	-64798	NM_004457	2181	Hs.655772	NM_004457	ENSG00000123983	ACSL3	ACS3|FACL3|PRO2194	acyl-CoA synthetase long-chain family member 3	protein-coding	0.73	3.4	1.68	13.06	16.93	7.43	26.47	2.66451
chr12	105347075	105347575	Intergenic	Intergenic	-24853	NM_032148	84102	Hs.577463	NM_032148	ENSG00000136052	SLC41A2	SLC41A1-L1	solute carrier family 41 member 2	protein-coding	2.02	1.29	2.07	26.75	14.09	19.18	16.13	2.32564
chr7	84158654	84159154	Intergenic	Intergenic	-2888	NR_110080	101927378	Hs.539042	NR_110079	ENSG00000235139	LOC101927378	-	uncharacterized LOC101927378	ncRNA	2.2	1.29	1.19	54.95	5.54	6.19	21.46	2.75463
chr1	220292329	220292829	promoter-TSS (NR_029711)	promoter-TSS (NR_029711)	-996	NR_029711	406969		NR_029711	ENSG00000207624	MIR194-1	MIRN194-1|mir-194-1	microRNA 194-1	ncRNA	2.02	0.97	0.99	16.59	9.81	14.54	22.87	2.83621
chr8	59762660	59763160	intron (NM_014729, intron 4 of 8)	MER74B|LTR|ERVL	-190506	NM_003580	8439	Hs.372000	NM_003580	ENSG00000035681	NSMAF	FAN|GRAMD5	neutral sphingomyelinase activation associated factor	protein-coding	13.94	35.43	7.9	2.07	2.53	3.87	2.04	-3.50102
chr9	5093028	5093528	intron (NM_001322204, intron 19 of 21)	intron (NM_001322204, intron 19 of 21)	51585	NM_001322204	3717	Hs.656213	NM_004972	ENSG00000096968	JAK2	JTK10|THCYT3	Janus kinase 2	protein-coding	0.73	1.13	1.19	0.83	1.74	254.31	1.1	3.78572
chr4	144146296	144146796	Intergenic	L2c|LINE|L2	40476	NM_032557	84640	Hs.480848	NM_032557	ENSG00000170185	USP38	HP43.8KD	ubiquitin specific peptidase 38	protein-coding	1.28	0.81	2.67	34.01	5.86	51.2	13.31	2.79216
chr9	126907013	126907513	Intergenic	MER77B|LTR|ERVL	-112622	NM_001166167	10783	Hs.197071	NM_014397	ENSG00000119408	NEK6	SID6-1512	NIMA related kinase 6	protein-coding	2.38	1.46	1.58	19.08	11.55	56.93	8.46	2.55658
chr7	63386540	63387040	Intergenic	CpG	103690	NR_039987	100506050	Hs.405628	NR_039987		LINC01005	-	long intergenic non-protein coding RNA 1005	ncRNA	31.92	79.44	8.3	6.22	8.23	12.53	7.36	-2.97806
chr9	74577170	74577670	intron (NM_182505, intron 2 of 3)	intron (NM_182505, intron 2 of 3)	50997	NM_182505	138241	Hs.534190	NM_182505	ENSG00000155621	C9orf85	-	chromosome 9 open reading frame 85	protein-coding	1.28	2.1	0.99	20.53	9.18	28.46	21.3	3.19046
chr8	82902830	82903330	Intergenic	L1PA6|LINE|L1	-148559	NM_022133	64089	Hs.492121	NM_022133	ENSG00000104497	SNX16	-	sorting nexin 16	protein-coding	0.37	4.04	4.15	58.47	7.44	66.98	20.05	2.83525
chr5	150961313	150961813	Intergenic	Intergenic	-13058	NM_001447	2196	Hs.591255	NM_001447	ENSG00000086570	FAT2	CDHF8|CDHR9|HFAT2|MEGF1	FAT atypical cadherin 2	protein-coding	19.26	27.02	10.07	2.9	1.58	11.29	2.98	-3.22495
chr6	147880038	147880538	intron (NM_001030060, intron 1 of 1)	intron (NM_001030060, intron 1 of 1)	50460	NM_001030060	389432	Hs.567973	NM_001030060	ENSG00000203727	SAMD5	dJ875H10.1	sterile alpha motif domain containing 5	protein-coding	2.02	0.97	1.48	14.1	13.45	19.49	19.89	2.92803
chr8	29144330	29144830	Intergenic	Intergenic	-23970	NM_015254	23303	Hs.444767	NM_015254	ENSG00000197892	KIF13B	GAKIN	kinesin family member 13B	protein-coding	7.52	17.47	4.74	241.78	21.68	96.37	54.82	2.84301
chr11	27417025	27417525	intron (NM_001346432, intron 1 of 16)	intron (NM_001346432, intron 1 of 16)	-32480	NM_080654	91057	Hs.143733	NM_030771	ENSG00000109881	CCDC34	L15|NY-REN-41|RAMA3	coiled-coil domain containing 34	protein-coding	1.1	1.29	1.68	20.11	9.18	22.12	19.42	2.60064
chr20	59962644	59963144	intron (NM_001794, intron 2 of 15)	intron (NM_001794, intron 2 of 15)	-111583	NM_001252338	1002	Hs.473231	NM_001794	ENSG00000179242	CDH4	CAD4|R-CAD|RCAD	cadherin 4	protein-coding	11.01	17.96	3.95	3.53	2.53	13.3	2.98	-2.36334
chr1	102511235	102511735	Intergenic	MER50C|LTR|ERV1	-48695	NR_110211	118427	Hs.484475	NM_058170	ENSG00000118733	OLFM3	NOE3|NOELIN3|OPTIMEDIN	olfactomedin 3	protein-coding	2.38	1.13	1.88	49.97	13.77	7.73	27.1	3.25291
chr4	25789644	25790144	exon (NM_015187, exon 13 of 24)	exon (NM_015187, exon 13 of 24)	74759	NM_015187	23231	Hs.479384	NM_015187	ENSG00000091490	SEL1L3	Sel-1L3	SEL1L family member 3	protein-coding	1.47	2.27	1.09	18.45	24.85	14.23	21.93	2.86372
chrX	118018525	118019025	Intergenic	LTR71A|LTR|ERV1	45256	NR_110393	101928287	Hs.496647	NR_110393	ENSG00000203650	LINC01285	-	long intergenic non-protein coding RNA 1285	ncRNA	1.65	2.59	1.38	7.88	14.24	14.08	24.75	2.48703
chr12	15933371	15933871	intron (NM_004447, intron 1 of 20)	intron (NM_004447, intron 1 of 20)	8889	NM_004447	2059	Hs.591160	NM_004447	ENSG00000151491	EPS8	DFNB102	epidermal growth factor receptor pathway substrate 8	protein-coding	1.1	1.78	0.59	14.51	9.65	18.1	16.6	2.92677
chr7	158225473	158225973	intron (NM_130842, intron 1 of 21)	L1ME3|LINE|L1	99782	NR_030325	693180		NR_030325	ENSG00000207637	MIR595	MIRN595|hsa-mir-595	microRNA 595	ncRNA	2.2	4.21	2.07	12.44	6.17	84.92	40.26	2.73742
chr8	122346280	122346780	Intergenic	L1HS|LINE|L1	-305056	NR_002835	594842	Hs.668686	NR_002835		HAS2-AS1	HAS2-AS|HAS2AS|HASNT|NCRNA00077	HAS2 antisense RNA 1	ncRNA	1.65	0.16	0.79	8.5	5.7	21.66	17.39	2.61063
chr10	89891430	89891930	Intergenic	Intergenic	268485	NM_000314	5728	Hs.500466	NM_000314	ENSG00000171862	PTEN	10q23del|BZS|CWS1|DEC|GLM2|MHAM|MMAC1|PTEN1|TEP1	phosphatase and tensin homolog	protein-coding	18.89	38.99	7.31	1.66	4.11	9.44	3.13	-3.22279
chr6	12343833	12344333	Intergenic	Intergenic	53554	NM_001955	1906	Hs.511899	NM_001955	ENSG00000078401	EDN1	ARCND3|ET1|HDLCQ7|PPET1|QME	endothelin 1	protein-coding	2.2	3.4	2.57	41.06	23.58	70.23	37.59	3.52799
chr14	32942661	32943161	intron (NM_004274, intron 2 of 13)	intron (NM_004274, intron 2 of 13)	144432	NM_004274	9472	Hs.509083	NM_004274	ENSG00000151320	AKAP6	ADAP100|ADAP6|AKAP100|PRKA6|mAKAP	A-kinase anchoring protein 6	protein-coding	12.66	21.84	4.84	3.94	1.58	13.92	3.92	-2.36557
chr2	231964972	231965472	intron (NR_034059, intron 15 of 23)	LTR10F|LTR|ERV1	24602	NM_000867	3357	Hs.421649	NM_000867	ENSG00000135914	HTR2B	5-HT(2B)|5-HT-2B|5-HT2B	5-hydroxytryptamine receptor 2B	protein-coding	1.83	1.29	1.58	6.01	20.1	14.39	7.52	2.35176
chr2	62651952	62652452	Intergenic	Intergenic	81402	NM_198276	200728	Hs.308028	NM_198276	ENSG00000186889	TMEM17	-	transmembrane protein 17	protein-coding	7.7	27.67	6.62	2.28	1.27	5.26	5.8	-3.14382
chr6	12332044	12332544	Intergenic	L2b|LINE|L2	41765	NM_001955	1906	Hs.511899	NM_001955	ENSG00000078401	EDN1	ARCND3|ET1|HDLCQ7|PPET1|QME	endothelin 1	protein-coding	3.12	4.85	1.68	25.5	31.49	14.7	50.28	2.96055
chr8	17646933	17647433	intron (NM_001001924, intron 1 of 14)	intron (NM_001001924, intron 1 of 14)	11243	NM_001001925	57509	Hs.7946	NM_020749	ENSG00000129422	MTUS1	ATBP|ATIP|ICIS|MP44|MTSG1	microtubule associated tumor suppressor 1	protein-coding	3.12	2.43	1.28	17.83	16.3	8.66	21.3	2.33174
chr2	172410282	172410782	intron (NM_024843, intron 3 of 3)	MER51A|LTR|ERV1	31666	NM_001127383	79901	Hs.221941	NM_024843	ENSG00000071967	CYBRD1	CYB561A2|DCYTB|FRRS3	cytochrome b reductase 1	protein-coding	0.92	1.94	1.58	18.04	7.91	44.7	33.05	3.25294
chr7	151442277	151442777	intron (NM_016203, intron 3 of 15)	intron (NM_016203, intron 3 of 15)	-9127	NM_001304527	51422	Hs.647072	NM_016203	ENSG00000106617	PRKAG2	AAKG|AAKG2|CMH6|H91620p|WPWS	protein kinase AMP-activated non-catalytic subunit gamma 2	protein-coding	3.3	6.8	2.96	29.44	13.45	105.96	47.3	2.43528
chr11	3593010	3593510	promoter-TSS (NR_126335)	promoter-TSS (NR_126335)	-43	NR_126335	101927708	Hs.577316	NR_126335	ENSG00000255367	LOC101927708	-	uncharacterized LOC101927708	ncRNA	1.28	3.07	1.88	20.74	5.7	39.29	18.33	2.39052
chr9	129874350	129874850	intron (NM_012098, intron 1 of 4)	intron (NM_012098, intron 1 of 4)	10444	NM_012098	23452	Hs.653262	NM_012098	ENSG00000136859	ANGPTL2	ARP2|HARP	angiopoietin like 2	protein-coding	11.56	42.06	7.21	3.11	2.53	11.14	17.07	-2.35639
chr1	89554204	89554704	Intergenic	L1P3|LINE|L1	-23411	NM_002053	2633	Hs.62661	NM_002053	ENSG00000117228	GBP1	-	guanylate binding protein 1	protein-coding	1.28	3.24	1.28	18.66	12.5	12.22	18.01	2.57174
chr19	37288063	37288563	promoter-TSS (NR_040028)	promoter-TSS (NR_040028)	-139	NR_040027	284408	Hs.570010	NR_040027	ENSG00000267254	ZNF790-AS1	-	ZNF790 antisense RNA 1	ncRNA	18.71	34.14	12.64	6.22	5.7	5.72	3.13	-3.04428
chr1	223829156	223829656	intron (NM_001143962, intron 2 of 16)	L2|LINE|L2	24030	NM_001143962	388743	Hs.291487	NM_001143962	ENSG00000203697	CAPN8	nCL-2	calpain 8	protein-coding	2.93	3.4	2.67	26.54	13.29	37.74	21.15	2.53528
chr3	72200071	72200571	promoter-TSS (NR_038221)	promoter-TSS (NR_038221)	-87	NR_038221	201617	Hs.382623	NR_038221	ENSG00000243083	LINC00870	-	long intergenic non-protein coding RNA 870	ncRNA	1.1	3.56	1.28	42.51	10.76	21.04	14.1	2.7626
chr18	3043186	3043686	Intergenic	Intergenic	-31491	NM_014646	9663	Hs.132342	NM_014646	ENSG00000101577	LPIN2	-	lipin 2	protein-coding	2.2	2.43	1.98	16.17	14.56	3.4	31.95	2.42176
chr15	94791453	94791953	Intergenic	Intergenic	-49727	NM_018349	55784	Hs.33368	NM_018349	ENSG00000140563	MCTP2	-	multiple C2 and transmembrane domain containing 2	protein-coding	1.47	0.97	2.07	29.44	11.71	11.45	11.28	2.35582
chr12	126118203	126118703	intron (NM_001286219, intron 1 of 4)	L1MA2|LINE|L1	11455	NM_001286219	114795	Hs.524838	NM_052907	ENSG00000139364	TMEM132B	-	transmembrane protein 132B	protein-coding	17.98	40.77	9.48	1.87	2.37	3.09	5.33	-3.46604
chrX	38202289	38202789	Intergenic	Intergenic	-9197	NM_000531	5009	Hs.117050	NM_000531	ENSG00000036473	OTC	OCTD	ornithine carbamoyltransferase	protein-coding	0.73	0.97	1.19	13.48	9.81	30.94	16.13	3.12442
chr6	10660716	10661216	Intergenic	LTR12C|LTR|ERV1	33873	NR_026737	347744	Hs.61389	NM_001145020	ENSG00000137434	C6orf52	-	chromosome 6 open reading frame 52	protein-coding	2.38	2.43	1.68	1.66	1.42	6.5	56.23	2.56964
chr13	103733712	103734212	Intergenic	Intergenic	-14766	NM_000452	6555	Hs.194783	NM_000452	ENSG00000125255	SLC10A2	ASBT|IBAT|ISBT|NTCP2|PBAM	solute carrier family 10 member 2	protein-coding	1.65	1.62	1.88	22.6	7.12	6.96	22.56	2.5581
chr15	92562073	92562573	intron (NM_013272, intron 2 of 9)	intron (NM_013272, intron 2 of 9)	164793	NR_135775	28232	Hs.311187	NM_013272	ENSG00000176463	SLCO3A1	OATP-D|OATP-RP3|OATP3A1|OATPD|OATPRP3|SLC21A11	solute carrier organic anion transporter family member 3A1	protein-coding	13.39	20.87	7.6	3.53	4.43	21.19	1.88	-2.32457
chr12	93521694	93522194	intron (NR_040096, intron 3 of 4)	intron (NR_040096, intron 3 of 4)	-46198	NR_120492	102724933	Hs.663947	NR_120492	ENSG00000258171	LOC102724933	-	uncharacterized LOC102724933	ncRNA	10.27	33.17	9.09	2.07	2.06	23.82	5.64	-2.49294
chr5	139599177	139599677	intron (NM_032412, intron 2 of 2)	intron (NM_032412, intron 2 of 2)	44774	NM_032412	84418	Hs.529798	NM_032412	ENSG00000120306	CYSTM1	C5orf32|ORF1-FL49	cysteine rich transmembrane module containing 1	protein-coding	0.73	2.59	1.19	32.97	17.73	12.22	22.4	3.5432
chr18	68044001	68044501	Intergenic	Intergenic	7576	NR_110764	101060542	Hs.586967	NR_110764	ENSG00000266278	LINC01910	-	long intergenic non-protein coding RNA 1910	ncRNA	1.1	0.97	2.37	17	14.09	27.23	24.75	2.65049
chr7	55499538	55500038	3' UTR (NM_018697, exon 9 of 9)	3' UTR (NM_018697, exon 9 of 9)	66647	NM_018697	55915	Hs.595384	NM_018697	ENSG00000132434	LANCL2	GPR69B|TASP	LanC like 2	protein-coding	11.37	1.46	2.77	8.09	120.44	19.03	15.04	2.85207
chr8	119560839	119561339	intron (NM_001101676, intron 2 of 4)	L1PA3|LINE|L1	-72151	NR_038210	552860	Hs.571527	NR_038210	ENSG00000281641	SAMD12-AS1	C8orf26|NCRNA00252	SAMD12 antisense RNA 1	ncRNA	1.83	1.62	2.67	39.4	13.45	46.56	24.9	2.56862
chr10	33553100	33553600	intron (NR_045259, intron 2 of 15)	intron (NR_045259, intron 2 of 15)	70483	NM_001330068	8829	Hs.131704	NM_003873	ENSG00000099250	NRP1	BDCA4|CD304|NP1|NRP|VEGF165R	neuropilin 1	protein-coding	4.04	3.24	4.05	11.82	27.38	68.06	48.56	2.33044
chr3	33397051	33397551	intron (NM_001171713, intron 2 of 13)	intron (NM_001171713, intron 2 of 13)	78364	NM_001171713	25827	Hs.475872	NM_012157	ENSG00000153558	FBXL2	FBL2|FBL3	F-box and leucine rich repeat protein 2	protein-coding	3.12	2.91	1.09	28.62	15.19	13.77	21.93	2.54445
chr16	88554682	88555182	intron (NM_153813, intron 2 of 9)	intron (NM_153813, intron 2 of 9)	19606	NR_049821	100847057		NR_049821	ENSG00000263456	MIR5189	mir-5189	microRNA 5189	ncRNA	3.3	5.82	3.65	74.03	28.96	114.78	52.47	3.25576
chr9	97370775	97371275	intron (NM_001127628, intron 5 of 7)	intron (NM_001127628, intron 5 of 7)	-14911	NM_003837	8789	Hs.61255	NM_003837	ENSG00000130957	FBP2	-	fructose-bisphosphatase 2	protein-coding	2.75	3.07	4.44	29.03	17.25	112.15	42.76	2.4573
chr8	95210679	95211179	intron (NM_001144663, intron 1 of 17)	intron (NM_001144663, intron 1 of 17)	9886	NM_004063	1015	Hs.591853	NM_004063	ENSG00000079112	CDH17	CDH16|HPT-1|HPT1	cadherin 17	protein-coding	0.73	1.46	2.07	16.38	14.56	25.37	38.38	3.86659
chr3	193561734	193562234	Intergenic	Intergenic	150043	NR_027764	100128023	Hs.730112	NR_027764		DPPA2P3	-	developmental pluripotency associated 2 pseudogene 3	pseudo	3.49	1.46	1.48	21.57	33.71	23.51	33.05	3.05906
chr16	69515835	69516335	Intergenic	Intergenic	57587	NM_030579	80777	Hs.461131	NM_030579	ENSG00000103018	CYB5B	CYB5-M|CYPB5M|OMB5	cytochrome b5 type B	protein-coding	14.67	29.28	7.31	0.62	1.42	11.6	9.71	-2.91728
chr9	16824416	16824916	intron (NM_017637, intron 1 of 6)	intron (NM_017637, intron 1 of 6)	46120	NM_017637	54796	Hs.656581	NM_017637	ENSG00000173068	BNC2	BSN2	basonuclin 2	protein-coding	15.41	41.26	8.69	1.45	2.22	4.8	2.19	-3.867
chr7	100499502	100500002	Intergenic	Intergenic	-5998	NM_001302622	43	Hs.154495	NM_000665	ENSG00000087085	ACHE	ACEE|ARACHE|N-ACHE|YT	acetylcholinesterase (Cartwright blood group)	protein-coding	2.02	3.4	2.27	58.06	13.61	29.39	10.02	2.81642
chr2	190387340	190387840	Intergenic	Intergenic	57947	NM_014585	30061	Hs.643005	NM_014585	ENSG00000138449	SLC40A1	FPN1|HFE4|IREG1|MST079|MSTP079|MTP1|SLC11A3	solute carrier family 40 member 1	protein-coding	2.38	2.75	2.57	26.75	24.21	28.93	14.57	2.53614
chr18	37321809	37322309	intron (NR_024391, intron 2 of 3)	intron (NR_024391, intron 2 of 3)	9900	NR_024391	647946	Hs.649350	NR_024391	ENSG00000267374	MIR924HG	LINC00669	MIR924 host gene	ncRNA	13.94	27.34	6.72	1.24	3.17	0.77	2.98	-3.39068
chr10	43185830	43186330	non-coding (NR_120659, exon 2 of 5)	non-coding (NR_120659, exon 2 of 5)	1127	NR_120657	101929397	Hs.729796	NR_120656		LINC01518	-	long intergenic non-protein coding RNA 1518	ncRNA	3.85	6.8	4.64	5.39	3.64	9.59	126.25	2.32699
chr7	77022538	77023038	intron (NM_017439, intron 5 of 30)	L2a|LINE|L2	-21727	NR_110073	101927243	Hs.547753	NR_110073		LOC101927243	-	uncharacterized LOC101927243	ncRNA	14.67	20.39	5.43	1.45	1.11	4.02	2.51	-3.84148
chr11	111205367	111205867	Intergenic	Intergenic	-12865	NR_039712	100616330		NR_039712	ENSG00000264032	MIR4491	mir-4491	microRNA 4491	ncRNA	3.3	3.24	2.37	13.89	20.1	29.39	64.53	2.37534
chr5	134408457	134408957	intron (NM_001277348, intron 2 of 5)	intron (NM_001277348, intron 2 of 5)	-32970	NR_105050	101927953	Hs.436898	NR_105049	ENSG00000249082	C5orf66-AS1	CTC-276P9.1|Epist	C5orf66 antisense RNA 1	ncRNA	25.31	71.19	15.11	6.22	6.17	24.29	15.19	-2.41658
chr7	16886889	16887389	Intergenic	Intergenic	34474	NM_176813	155465	Hs.100686	NM_176813	ENSG00000173467	AGR3	AG-3|AG3|BCMP11|HAG3|PDIA18|hAG-3	anterior gradient 3, protein disulphide isomerase family member	protein-coding	3.12	5.18	2.57	24.88	24.69	29.24	46.05	2.43721
chr8	135814413	135814913	Intergenic	Intergenic	-1813	NR_029666	407030		NR_029666	ENSG00000207582	MIR30B	MIRN30B|mir-30b	microRNA 30b	ncRNA	1.1	1.46	0.99	4.15	8.7	14.08	16.45	2.63757
chr3	123473825	123474325	intron (NM_053027, intron 4 of 32)	intron (NM_053027, intron 4 of 32)	65584	NR_046629	100873940	Hs.667316	NR_046629	ENSG00000250174	MYLK-AS2	-	MYLK antisense RNA 2	ncRNA	1.65	1.94	2.96	22.6	9.02	94.2	6.11	2.5672
chr13	29119714	29120214	Intergenic	Intergenic	-50699	NM_001160030	2321	Hs.594454	NM_002019	ENSG00000102755	FLT1	FLT|FLT-1|VEGFR-1|VEGFR1	fms related tyrosine kinase 1	protein-coding	1.1	2.27	1.28	24.68	3.01	33.72	1.88	2.39967
chr9	79200969	79201469	Intergenic	L1ME3|LINE|L1	85670	NM_001097636	2650	Hs.521568	NM_001490	ENSG00000187210	GCNT1	C2GNT|C2GNT-L|C2GNT1|G6NT|NACGT2|NAGCT2	glucosaminyl (N-acetyl) transferase 1, core 2	protein-coding	1.65	0.49	1.48	41.47	19.47	29.24	43.39	3.63221
chr10	81956114	81956614	intron (NM_001278408, intron 1 of 16)	intron (NM_001278408, intron 1 of 16)	7883	NM_001278408	311	Hs.530291	NM_001157	ENSG00000122359	ANXA11	ANX11|CAP50	annexin A11	protein-coding	9.17	21.52	5.23	83.77	41.62	142.47	94.29	2.64823
chr14	36677876	36678376	Intergenic	Intergenic	-32269	NR_049735	100886964	Hs.742592	NR_049735		PTCSC3	-	papillary thyroid carcinoma susceptibility candidate 3 (non-protein coding)	ncRNA	1.1	0.97	1.48	6.22	8.07	11.76	31.95	2.61018
chr12	125564410	125564910	intron (NM_023928, intron 3 of 17)	intron (NM_023928, intron 3 of 17)	14747	NM_001319839	65985	Hs.656073	NM_023928	ENSG00000081760	AACS	ACSF1|SUR-5	acetoacetyl-CoA synthetase	protein-coding	14.31	22.81	6.12	0.62	2.69	5.57	8.61	-2.55657
chr17	36070225	36070725	intron (NM_001304286, intron 5 of 6)	intron (NM_001304286, intron 5 of 6)	34594	NM_001304286	6928	Hs.191144	NM_000458	ENSG00000275410	HNF1B	FJHN|HNF-1-beta|HNF-1B|HNF1beta|HNF2|HPC11|LF-B3|LFB3|MODY5|TCF-2|TCF2|VHNF1	HNF1 homeobox B	protein-coding	1.28	2.59	3.36	33.18	22.16	86.47	69.08	3.55137
chr20	52403392	52403892	Intergenic	MER20|DNA|hAT-Charlie	88606	NR_002189	391257	Hs.449977	NR_002189		SUMO1P1	PIC1L|UBL2|UBL6	SUMO1 pseudogene 1	pseudo	4.59	5.66	2.37	25.09	27.38	67.91	57.95	2.51633
chr8	120981796	120982296	intron (NM_022783, intron 4 of 8)	intron (NM_022783, intron 4 of 8)	96151	NM_022783	64798	Hs.112981	NM_022783	ENSG00000155792	DEPTOR	DEP.6|DEPDC6	DEP domain containing MTOR interacting protein	protein-coding	3.12	1.29	1.09	10.99	13.45	26.76	11.12	2.57404
chr6	10048581	10049081	Intergenic	Intergenic	-363720	NR_033910	100130275	Hs.661431	NR_033910		TFAP2A-AS1	-	TFAP2A antisense RNA 1	ncRNA	2.57	1.29	2.86	25.5	17.41	21.35	23.03	2.40153
chr6	123377895	123378395	intron (NM_001010852, intron 5 of 5)	intron (NM_001010852, intron 5 of 5)	61029	NM_001010852	134829	Hs.486361	NM_001010852	ENSG00000146352	CLVS2	C6orf212|C6orf213|RLBP1L2|bA160A10.4	clavesin 2	protein-coding	1.1	0.81	2.37	21.36	21.21	25.68	15.51	2.80197
chr6	64206254	64206754	Intergenic	MIR|SINE|MIR	-75413	NM_003463	7803	Hs.227777	NM_003463	ENSG00000112245	PTP4A1	HH72|PRL-1|PRL1|PTP(CAAX1)|PTPCAAX1	protein tyrosine phosphatase type IVA, member 1	protein-coding	2.2	1.78	0.99	36.29	9.65	14.85	10.49	2.54907
chr9	75610132	75610632	Intergenic	Tigger1|DNA|TcMar-Tigger	-42149	NM_000689	216	Hs.76392	NM_000689	ENSG00000165092	ALDH1A1	ALDC|ALDH-E1|ALDH1|ALDH11|HEL-9|HEL-S-53e|HEL12|PUMB1|RALDH1	aldehyde dehydrogenase 1 family member A1	protein-coding	1.65	0.65	1.38	10.58	7.44	4.49	10.18	2.51053
chr16	81678904	81679404	intron (NM_030629, intron 3 of 20)	intron (NM_030629, intron 3 of 20)	-19805	NR_045112	100129617	Hs.657151	NR_045112		LOC100129617	-	uncharacterized LOC100129617	ncRNA	12.29	66.17	7.51	1.66	5.38	5.57	6.27	-3.0316
chr7	89859000	89859500	exon (NM_001244945, exon 4 of 6)	exon (NM_001244945, exon 4 of 6)	-15238	NM_001039706	79846	Hs.521014	NM_024788	ENSG00000105792	CFAP69	C7orf63|FAP69	cilia and flagella associated protein 69	protein-coding	1.47	3.4	2.77	52.46	15.83	10.98	13.63	2.47067
chr5	44002646	44003146	Intergenic	Intergenic	385888	NM_004465	2255	Hs.248049	NM_004465	ENSG00000070193	FGF10	-	fibroblast growth factor 10	protein-coding	1.65	1.29	2.47	42.92	12.82	30.16	15.98	3.38464
chr9	19397785	19398285	Intergenic	Intergenic	-10890	NM_001010887	340485	Hs.41379	NM_001010887	ENSG00000177076	ACER2	ALKCDase2|ASAH3L	alkaline ceramidase 2	protein-coding	2.38	2.75	2.37	72.16	20.26	13.3	64.53	3.46287
chr1	239516768	239517268	Intergenic	Intergenic	-33212	NM_001347716	1131	Hs.7138	NM_000740	ENSG00000133019	CHRM3	EGBRS|HM3|PBS	cholinergic receptor muscarinic 3	protein-coding	0.73	1.94	1.98	18.66	9.02	21.19	21.15	2.70873
chr12	112903812	112904312	intron (NM_001330437, intron 6 of 15)	L2a|LINE|L2	47360	NM_002834	5781	Hs.506852	NM_002834	ENSG00000179295	PTPN11	BPTP3|CFC|JMML|METCDS|NS1|PTP-1D|PTP2C|SH-PTP2|SH-PTP3|SHP2	protein tyrosine phosphatase, non-receptor type 11	protein-coding	2.02	2.1	1.78	24.05	5.38	4.02	26.31	2.48418
chr4	57026732	57027232	Intergenic	Intergenic	-9379	NM_020722	57482	Hs.596667	NM_020722	ENSG00000109265	KIAA1211	-	KIAA1211	protein-coding	0.73	0.65	1.78	9.12	2.69	17.33	7.21	2.37498
chr1	66902124	66902624	Intergenic	MIR3|SINE|MIR	82313	NM_001297442	5142	Hs.198072	NM_002600	ENSG00000184588	PDE4B	DPDE4|PDEIVB	phosphodiesterase 4B	protein-coding	15.78	58.24	8.2	6.84	4.27	6.5	5.01	-2.92333
chr6	91555318	91555818	Intergenic	Intergenic	-258548	NM_003188	6885	Hs.594838	NM_003188	ENSG00000135341	MAP3K7	CSCF|FMD2|MEKK7|TAK1|TGF1a	mitogen-activated protein kinase kinase kinase 7	protein-coding	18.34	39.15	8.3	2.07	2.22	0.77	1.1	-4.38945
chr11	107142093	107142593	Intergenic	Intergenic	186229	NM_152434	143884	Hs.212140	NM_152434	ENSG00000152404	CWF19L2	-	CWF19-like 2, cell cycle control (S. pombe)	protein-coding	1.47	1.13	0.2	10.37	7.28	8.04	11.75	2.86528
chr18	40224720	40225220	intron (NR_046174, intron 7 of 9)	MER89|LTR|ERV1	458337	NR_046457	284260	Hs.652819	NR_046174	ENSG00000267586	LINC00907	-	long intergenic non-protein coding RNA 907	ncRNA	1.83	0.65	2.47	15.76	24.69	4.02	32.74	2.82962
chr14	87175052	87175552	Intergenic	MIRc|SINE|MIR	-196820	NR_038445	283585	Hs.381998	NR_038445	ENSG00000258804	LINC01148	-	long intergenic non-protein coding RNA 1148	ncRNA	1.28	1.13	2.37	14.1	19.62	26.45	15.04	2.62567
chr10	1331780	1332280	intron (NM_018702, intron 3 of 9)	intron (NM_018702, intron 3 of 9)	126322	NR_015376	399706	Hs.721191	NM_001010910	ENSG00000229205	LINC00200	C10orf139|NCRNA00200	long intergenic non-protein coding RNA 200	ncRNA	13.76	44.01	8.79	2.49	4.59	6.96	6.58	-2.80601
chr11	77755702	77756202	intron (NM_001203262, intron 1 of 2)	MER50|LTR|ERV1	1285	NM_001282406	65987	Hs.709780	NM_023930	ENSG00000151364	KCTD14	-	potassium channel tetramerization domain containing 14	protein-coding	4.59	3.72	1.19	26.75	12.98	23.82	54.67	2.5619
chr12	15865635	15866135	intron (NM_004447, intron 1 of 20)	intron (NM_004447, intron 1 of 20)	76625	NM_004447	2059	Hs.591160	NM_004447	ENSG00000151491	EPS8	DFNB102	epidermal growth factor receptor pathway substrate 8	protein-coding	0.55	1.29	1.98	19.49	26.43	28.62	34.77	3.61938
chr7	55762105	55762605	intron (NR_003949, intron 2 of 5)	intron (NR_003949, intron 2 of 5)	-5202	NR_027339	360132	Hs.446691	NM_182827	ENSG00000176826	FKBP9P1	FKBP9L	FK506 binding protein 9 pseudogene 1	pseudo	7.15	3.24	2.77	44.17	276.17	34.5	33.52	4.375
chr10	74439478	74439978	Intergenic	Intergenic	-12161	NR_073062	90550	Hs.591366	NM_138357	ENSG00000156026	MCU	C10orf42|CCDC109A|HsMCU	mitochondrial calcium uniporter	protein-coding	1.1	1.62	1.58	14.72	18.99	36.04	22.4	3.35215
chr2	628545	629045	Intergenic	Intergenic	48644	NM_152834	129787	Hs.43899	NM_152834	ENSG00000151353	TMEM18	-	transmembrane protein 18	protein-coding	7.89	27.83	8.39	4.35	3.01	14.23	4.07	-2.52151
chr3	168770647	168771147	Intergenic	Intergenic	93196	NM_001105077	2122	Hs.744090	NM_004991	ENSG00000085276	MECOM	AML1-EVI-1|EVI1|KMT8E|MDS1|MDS1-EVI1|PRDM3|RUSAT2	MDS1 and EVI1 complex locus	protein-coding	11.56	26.7	3.85	0.83	2.22	0.93	1.41	-3.97299
chr19	33532197	33532697	intron (NM_033103, intron 2 of 14)	intron (NM_033103, intron 2 of 14)	23377	NM_033103	85415	Hs.466435	NM_033103	ENSG00000131941	RHPN2	P76RBE|RHOBP	rhophilin Rho GTPase binding protein 2	protein-coding	2.38	2.91	1.48	20.53	10.29	89.41	30.39	3.07365
chr1	101109252	101109752	intron (NR_038914, intron 2 of 4)	intron (NR_038914, intron 2 of 4)	3058	NR_038914	100128787	Hs.536050	NR_038914		LINC01349	-	long intergenic non-protein coding RNA 1349	ncRNA	2.02	1.29	0.69	8.09	11.08	4.18	9.4	2.55577
chr9	124088415	124088915	intron (NM_001127667, intron 13 of 18)	intron (NM_001127667, intron 13 of 18)	26586	NM_000177	2934	Hs.522373	NM_000177	ENSG00000148180	GSN	ADF|AGEL	gelsolin	protein-coding	17.06	89.47	17.48	2.7	4.27	16.55	12.06	-3.02719
chr16	14763585	14764085	TTS (NM_016561)	TTS (NM_016561)	24595	NM_003561	8399	Hs.567366	NM_003561	ENSG00000069764	PLA2G10	GXPLA2|GXSPLA2|SPLA2|sPLA2-X	phospholipase A2 group X	protein-coding	3.12	5.82	2.17	26.13	22	20.26	45.74	2.37297
chr20	49362939	49363439	intron (NM_032521, intron 2 of 2)	intron (NM_032521, intron 2 of 2)	15108	NM_032521	84612	Hs.589848	NM_032521	ENSG00000124171	PARD6B	PAR6B	par-6 family cell polarity regulator beta	protein-coding	2.02	1.78	0.89	14.31	16.3	21.35	18.01	3.00034
chr5	5025826	5026326	Intergenic	LTR12F|LTR|ERV1	-8396	NR_026994	340094	Hs.665092	NR_026994	ENSG00000215231	LINC01020	-	long intergenic non-protein coding RNA 1020	ncRNA	3.85	2.1	2.07	72.37	3.64	27.53	8.61	2.62894
chr2	219944106	219944606	intron (NM_024782, intron 5 of 7)	intron (NM_024782, intron 5 of 7)	-19118	NM_002181	3549	Hs.654504	NM_002181	ENSG00000163501	IHH	BDA1|HHG2	indian hedgehog	protein-coding	2.93	2.59	2.67	32.76	14.56	35.27	30.54	2.5252
chr15	90667680	90668180	Intergenic	Intergenic	-22144	NM_002168	3418	Hs.596461	NM_002168	ENSG00000182054	IDH2	D2HGA2|ICD-M|IDH|IDHM|IDP|IDPM|mNADP-IDH	isocitrate dehydrogenase (NADP(+)) 2, mitochondrial	protein-coding	1.28	1.13	1.19	11.4	2.69	27.53	2.04	2.61616
chr8	26339482	26339982	Intergenic	Intergenic	31751	NM_007257	10687	Hs.591838	NM_007257	ENSG00000240694	PNMA2	MA2|MM2|RGAG2	paraneoplastic Ma antigen 2	protein-coding	1.65	1.78	2.27	12.86	16.14	28.46	34.77	2.83528
chr3	197547841	197548341	intron (NM_032773, intron 4 of 18)	L3|LINE|CR1	29994	NM_032773	84859	Hs.518414	NM_032773	ENSG00000186001	LRCH3	-	leucine rich repeats and calponin homology domain containing 3	protein-coding	1.1	0.97	0.89	6.43	6.49	15.93	9.08	2.58686
chr1	113394819	113395319	Intergenic	LTR9|LTR|ERV1	-1804	NR_103746	100996702	Hs.632431	NR_103746	ENSG00000215866	LINC01356	-	long intergenic non-protein coding RNA 1356	ncRNA	2.2	1.62	1.68	20.11	13.29	16.24	33.52	2.69604
chr5	43402712	43403212	intron (NM_001301873, intron 1 of 3)	L1PA5|LINE|L1	-5596	NM_001301875	56477	Hs.656904	NM_019846	ENSG00000151882	CCL28	CCK1|MEC|SCYA28	C-C motif chemokine ligand 28	protein-coding	3.12	3.88	2.37	81.49	13.14	24.6	8.61	2.35028
chr3	100332769	100333269	intron (NM_032787, intron 1 of 15)	intron (NM_032787, intron 1 of 15)	4586	NM_032787	84873	Hs.334511	NM_032787	ENSG00000144820	ADGRG7	GPR128	adhesion G protein-coupled receptor G7	protein-coding	1.47	1.29	1.19	9.33	23.58	7.73	8.93	2.7618
chr8	8145902	8146402	Intergenic	Intergenic	60060	NR_024363	286042	Hs.656318	NR_024361	ENSG00000173295	FAM86B3P	-	family with sequence similarity 86, member A pseudogene	pseudo	3.12	3.4	2.86	50.18	15.51	33.41	8.46	2.32602
chr19	57813357	57813857	Intergenic	L1MA5|LINE|L1	-18258	NM_213598	125919	Hs.202544	NM_213598	ENSG00000178229	ZNF543	-	zinc finger protein 543	protein-coding	24.95	60.83	8.79	2.28	3.17	5.88	4.07	-4.09465
chr18	19581712	19582212	Intergenic	Intergenic	166967	NR_102763	100128893	Hs.514745	NR_102763	ENSG00000266010	GATA6-AS1	BM742401|locus5689	GATA6 antisense RNA 1 (head to head)	ncRNA	3.85	4.53	4.35	23.64	21.37	37.59	67.35	2.33704
chr3	137738502	137739002	intron (NM_016369, intron 1 of 4)	intron (NM_016369, intron 1 of 4)	9746	NM_016369	51208	Hs.655324	NM_016369	ENSG00000066405	CLDN18	SFTA5|SFTPJ	claudin 18	protein-coding	2.93	2.75	2.96	26.75	26.9	5.72	22.24	2.39919
chr2	70797119	70797619	Intergenic	Intergenic	-16222	NM_001099691	7039	Hs.170009	NM_003236	ENSG00000163235	TGFA	TFGA	transforming growth factor alpha	protein-coding	6.79	17.96	4.94	2.49	2.37	4.64	1.57	-2.75705
chr3	177995351	177995851	Intergenic	Intergenic	-141388	NR_046786	100874330	Hs.201902	NR_046786	ENSG00000223941	LINC01014	KCNMB2-IT1	long intergenic non-protein coding RNA 1014	ncRNA	2.93	0.32	2.27	16.8	9.02	9.13	20.83	2.43783
chr9	95417165	95417665	intron (NM_022755, intron 3 of 12)	intron (NM_022755, intron 3 of 12)	15132	NM_022755	64768	Hs.459896	NM_022755	ENSG00000127080	IPPK	C9orf12|INSP5K2|IP5K|IPK1|bA476B13.1	inositol-pentakisphosphate 2-kinase	protein-coding	21.65	57.6	10.86	2.49	1.42	15.62	5.33	-3.57291
chr4	15559367	15559867	intron (NM_001080522, intron 22 of 37)	intron (NM_001080522, intron 22 of 37)	88128	NM_020785	57545	Hs.590928	NM_020785	ENSG00000048342	CC2D2A	JBTS9|MKS6	coiled-coil and C2 domain containing 2A	protein-coding	1.1	2.59	1.48	27.99	13.77	47.8	8.77	3.17026
chr18	77937961	77938461	intron (NM_032510, intron 2 of 2)	intron (NM_032510, intron 2 of 2)	32404	NR_028340	100130522	Hs.352602	NM_001145731	ENSG00000267270	PARD6G-AS1	-	PARD6G antisense RNA 1	ncRNA	15.41	35.59	6.72	1.04	2.37	20.11	2.04	-2.75464
chr7	69197174	69197674	intron (NM_015570, intron 1 of 18)	intron (NM_015570, intron 1 of 18)	133519	NM_001127231	26053	Hs.21631	NM_015570	ENSG00000158321	AUTS2	FBRSL2|MRD26	autism susceptibility candidate 2	protein-coding	2.38	0.97	1.78	14.31	8.55	14.85	29.92	2.87586
chr15	89658759	89659259	intron (NM_152924, intron 2 of 10)	intron (NM_152924, intron 2 of 10)	27628	NM_152924	11057	Hs.122337	NM_007011	ENSG00000140526	ABHD2	HS1-2|LABH2|PHPS1-2	abhydrolase domain containing 2	protein-coding	4.77	3.88	2.37	48.73	25.16	65.74	66.57	2.99621
chr2	12078282	12078782	Intergenic	Intergenic	-68710	NR_110197	100506457	Hs.197824	NR_110196	ENSG00000224184	MIR3681HG	-	MIR3681 host gene	ncRNA	12.11	27.02	6.81	0.41	1.74	2.63	2.51	-3.8134
chr12	124716431	124716931	intron (NM_001204299, intron 3 of 4)	intron (NM_001204299, intron 3 of 4)	-57029	NM_181709	144347	Hs.432901	NM_181709	ENSG00000178882	RFLNA	CFM2|FAM101A	refilin A	protein-coding	2.2	5.34	2.96	31.1	21.68	58.63	64.53	3.19982
chr3	65913699	65914199	intron (NM_015520, intron 1 of 24)	MER63A|DNA|hAT-Blackjack	34458	NR_046575	100873983	Hs.663889	NR_046575	ENSG00000240175	MAGI1-AS1	-	MAGI1 antisense RNA 1	ncRNA	0.92	1.29	1.58	7.05	7.6	14.08	23.65	2.66868
chr14	27461659	27462159	Intergenic	ERVL-B4-int|LTR|ERVL	84061	NR_036193	100423019		NR_036193	ENSG00000265165	MIR4307	-	microRNA 4307	ncRNA	1.1	1.62	1.28	40.02	12.19	3.87	31.01	2.37377
chr2	233231201	233231701	Intergenic	LTR12C|LTR|ERV1	-11793	NM_001632	250	Hs.284255	NM_001632	ENSG00000163283	ALPP	ALP|PALP|PLAP|PLAP-1	alkaline phosphatase, placental	protein-coding	0.18	2.75	0.89	1.45	1.27	53.37	13.78	2.32369
chr3	27401985	27402485	intron (NM_152534, intron 2 of 38)	intron (NM_152534, intron 2 of 38)	8716	NM_199347	152110	Hs.506115	NM_152534	ENSG00000163491	NEK10	-	NIMA related kinase 10	protein-coding	2.38	0.81	1.98	29.03	7.91	17.94	12.69	2.43121
chr17	1673365	1673865	intron (NM_001329903, intron 3 of 7)	intron (NM_001329903, intron 3 of 7)	-1350	NM_001329905	5176	Hs.532768	NM_002615	ENSG00000132386	SERPINF1	EPC-1|OI12|OI6|PEDF|PIG35	serpin family F member 1	protein-coding	11.19	34.78	5.83	2.07	3.32	12.38	5.95	-2.60978
chr8	74219708	74220208	intron (NM_172037, intron 2 of 5)	intron (NM_172037, intron 2 of 5)	13121	NM_172037	157506	Hs.244940	NM_172037	ENSG00000121039	RDH10	SDR16C4	retinol dehydrogenase 10	protein-coding	3.67	0.65	1.78	20.32	22.32	16.4	22.87	2.44584
chr5	38660315	38660815	intron (NR_103554, intron 8 of 8)	LTR9|LTR|ERV1	59810	NR_104631	101926904	Hs.634191	NR_104631	ENSG00000249740	LINC01265	-	long intergenic non-protein coding RNA 1265	ncRNA	4.95	7.77	2.07	54.12	18.52	104.88	33.36	2.52759
chr4	142774507	142775007	Intergenic	MER68|LTR|ERVL	217008	NM_000585	3600	Hs.168132	NM_000585	ENSG00000164136	IL15	IL-15	interleukin 15	protein-coding	13.39	18.12	6.42	3.11	1.11	6.03	4.07	-2.88209
chr6	41487274	41487774	TTS (NR_120347)	TTS (NR_120347)	17342	NR_120347	103106903	Hs.563396	NR_120347	ENSG00000226917	LINC01276	-	long intergenic non-protein coding RNA 1276	ncRNA	2.75	2.43	1.68	68.84	18.04	54.3	42.76	2.91879
chr13	106643921	106644421	Intergenic	L2|LINE|L2	284992	NR_046391	144920	Hs.567700	NR_046391		LINC00343	LINC00344|NCRNA00343|NCRNA00344	long intergenic non-protein coding RNA 343	ncRNA	15.04	28.31	8.2	4.98	3.96	5.72	5.64	-2.50075
chr6	64168397	64168897	Intergenic	Intergenic	-113270	NM_003463	7803	Hs.227777	NM_003463	ENSG00000112245	PTP4A1	HH72|PRL-1|PRL1|PTP(CAAX1)|PTPCAAX1	protein tyrosine phosphatase type IVA, member 1	protein-coding	0.37	0.49	1.58	7.05	11.71	8.82	21.46	2.95482
chr8	136676877	136677377	Intergenic	Intergenic	207419	NM_006558	10656	Hs.444558	NM_006558	ENSG00000131773	KHDRBS3	Etle|SALP|SLM-2|SLM2|T-STAR|TSTAR|etoile	KH RNA binding domain containing, signal transduction associated 3	protein-coding	15.59	59.38	11.95	18.66	2.85	22.43	11.28	-2.72757
chr6	90094910	90095410	intron (NM_021244, intron 2 of 6)	intron (NM_021244, intron 2 of 6)	26835	NM_021244	58528	Hs.31712	NM_021244	ENSG00000025039	RRAGD	RAGD|bA11D8.2.1	Ras related GTP binding D	protein-coding	28.98	68.11	7.9	1.87	2.22	2.63	3.76	-4.43021
chr7	89247593	89248093	Intergenic	Intergenic	-500871	NR_003551	442523	Hs.406964	NR_003551	ENSG00000235436	DPY19L2P4	-	DPY19L2 pseudogene 4	pseudo	2.02	1.29	2.47	40.23	5.38	7.73	3.29	2.46848
chr11	59729168	59729668	intron (NR_130719, intron 3 of 8)	MER49|LTR|ERV1	19066	NR_130719	255649	Hs.722773	NR_130719	ENSG00000214788	OOSP1	-	oocyte secreted protein 1, pseudogene	pseudo	1.83	0.97	1.58	24.47	12.34	17.63	22.24	2.98941
chr8	134441037	134441537	Intergenic	Intergenic	-131740	NM_006096	10397	Hs.372914	NM_006096	ENSG00000104419	NDRG1	CAP43|CMT4D|DRG-1|DRG1|GC4|HMSNL|NDR1|NMSL|PROXY1|RIT42|RTP|TARG1|TDD5	N-myc downstream regulated 1	protein-coding	3.3	2.91	1.88	51.42	36.72	33.41	44.8	2.84624
chr6	157814131	157814631	intron (NM_153746, intron 1 of 8)	intron (NM_153746, intron 1 of 8)	11824	NM_024630	79683	Hs.596214	NM_024630	ENSG00000175048	ZDHHC14	NEW1CP	zinc finger DHHC-type containing 14	protein-coding	0.92	1.78	1.88	15.14	9.81	11.14	15.98	2.51807
chr14	31434979	31435479	intron (NM_001083893, intron 1 of 17)	LTR10F|LTR|ERV1	48719	NR_030354	693209		NR_030354	ENSG00000207952	MIR624	MIRN624|hsa-mir-624|mir-624	microRNA 624	ncRNA	2.38	1.62	0.99	19.28	20.57	31.09	3.13	2.94094
chr9	100924958	100925458	intron (NM_052820, intron 1 of 11)	intron (NM_052820, intron 1 of 11)	9966	NM_003389	7464	Hs.113094	NM_003389	ENSG00000106789	CORO2A	CLIPINB|IR10|WDR2	coronin 2A	protein-coding	17.06	40.29	9.18	4.15	3.64	28.31	7.99	-2.3929
chr8	11218386	11218886	intron (NR_001578, intron 4 of 8)	MIR|SINE|MIR	-7275	NR_026814	83656	Hs.583896	NM_054017	ENSG00000184608	FAM167A-AS1	C8orf12	FAM167A antisense RNA 1	ncRNA	1.65	1.94	2.07	103.06	5.7	30.47	13	3.54186
chr4	65207348	65207848	intron (NM_001010874, intron 2 of 11)	MER52A|LTR|ERV1	67580	NM_001010874	253017	Hs.227752	NM_001010874	ENSG00000205678	TECRL	CPVT3|GPSN2L|SRD5A2L2|TERL	trans-2,3-enoyl-CoA reductase-like	protein-coding	16.14	16.66	7.7	2.7	2.22	3.4	5.17	-3.06053
chr20	731478	731978	Intergenic	MLT1H|LTR|ERVL-MaLR	17500	NM_033409	113278	Hs.283865	NM_033409	ENSG00000101276	SLC52A3	BVVLS|BVVLS1|C20orf54|RFT2|RFVT3|bA371L19.1|hRFT2	solute carrier family 52 member 3	protein-coding	2.57	3.56	3.46	47.28	5.54	81.83	6.42	2.42004
chr7	33032278	33032778	intron (NM_001284341, intron 7 of 10)	intron (NM_001284341, intron 7 of 10)	13442	NM_001284343	11328	Hs.103934	NM_007270	ENSG00000122642	FKBP9	FKBP60|FKBP63|PPIase	FK506 binding protein 9	protein-coding	1.83	1.94	1.98	27.99	7.28	31.09	30.23	2.8114
chr11	69845805	69846305	Intergenic	L4|LINE|RTE	63975	NR_120530	101928443	Hs.313468	NR_120529	ENSG00000248844	LOC101928443	-	uncharacterized LOC101928443	ncRNA	3.85	2.75	2.27	38.36	42.26	18.41	21.77	2.65853
chr3	159903442	159903942	intron (NR_108088, intron 3 of 9)	intron (NR_108088, intron 3 of 9)	21187	NR_108088	101928376	Hs.565865	NR_108088	ENSG00000244040	IL12A-AS1	-	IL12A antisense RNA 1	ncRNA	2.75	2.91	2.96	51.63	34.5	18.25	36.18	3.25166
chr12	109208532	109209032	intron (NM_001161330, intron 5 of 13)	L2b|LINE|L2	12545	NM_001161331	54434	Hs.199763	NM_018984	ENSG00000084112	SSH1	SSH1L	slingshot protein phosphatase 1	protein-coding	11.37	35.11	7.11	3.32	2.85	14.54	3.45	-2.82924
chr4	77625225	77625725	intron (NM_020859, intron 2 of 10)	L2a|LINE|L2	128771	NR_039655	100616254		NR_039655	ENSG00000283682	MIR548AH	-	microRNA 548ah	ncRNA	1.47	7.12	2.77	26.75	17.73	33.88	50.91	2.52381
chr4	154166049	154166549	intron (NM_001302693, intron 1 of 2)	intron (NM_001302693, intron 1 of 2)	-12212	NM_001302694	23321	Hs.435711	NM_015271	ENSG00000109654	TRIM2	CMT2R|RNF86	tripartite motif containing 2	protein-coding	1.65	2.59	1.58	13.89	9.81	6.19	25.37	2.33688
chr8	9291582	9292082	Intergenic	LTR25|LTR|ERV1	109271	NR_040039	157273	Hs.650222	NR_040039	ENSG00000254235	LOC157273	-	uncharacterized LOC157273	ncRNA	1.28	2.27	2.57	114.25	4.43	16.71	0.94	2.91129
chr8	128227298	128227798	intron (NR_108049, intron 1 of 1)	intron (NR_108049, intron 1 of 1)	3965	NR_108049	100507056	Hs.343864	NR_108049		CCAT1	CARLo-5|onco-lncRNA-40	colon cancer associated transcript 1 (non-protein coding)	ncRNA	2.38	2.27	1.38	19.49	24.21	30.01	19.89	2.54403
chr19	35497245	35497745	intron (NM_001136199, intron 1 of 17)	L2c|LINE|L2	6271	NM_001320035	57655	Hs.515351	NM_020895	ENSG00000089351	GRAMD1A	KIAA1533	GRAM domain containing 1A	protein-coding	2.75	6.8	2.57	29.86	11.55	102.71	33.36	2.4577
chr4	141264385	141264885	promoter-TSS (NM_001153635)	promoter-TSS (NM_001153635)	20	NM_001153585	60592	Hs.480815	NM_032547	ENSG00000153130	SCOC	HRIHFB2072|SCOCO|UNC-69	short coiled-coil protein	protein-coding	2.57	2.27	3.56	38.78	22.47	39.45	37.44	2.60853
chr3	176929677	176930177	Intergenic	Intergenic	-14813	NM_001321194	79718	Hs.714201	NM_024665	ENSG00000177565	TBL1XR1	C21|DC42|IRA1|MRD41|TBLR1	transducin beta like 1 X-linked receptor 1	protein-coding	2.2	5.02	1.98	22.39	22.47	26.76	42.76	2.5329
chr12	65044502	65045002	intron (NR_040718, intron 1 of 3)	intron (NR_040718, intron 1 of 3)	-28367	NR_037515	100500856		NR_037515	ENSG00000266016	MIR548Z	-	microRNA 548z	ncRNA	1.1	0.65	2.07	7.88	7.44	12.22	21.93	2.57891
chr10	26637787	26638287	Intergenic	MER11A|LTR|ERVK	-89229	NM_019043	54518	Hs.310421	NM_019043	ENSG00000077420	APBB1IP	INAG1|PREL1|RARP1|RIAM	amyloid beta precursor protein binding family B member 1 interacting protein	protein-coding	3.12	1.13	1.68	6.01	23.26	12.38	29.6	2.53378
chr9	35669293	35669793	Intergenic	Intergenic	-4265	NM_032818	84904	Hs.534579	NM_032818	ENSG00000137135	ARHGEF39	C9orf100	Rho guanine nucleotide exchange factor 39	protein-coding	3.12	5.18	2.27	36.91	11.71	15.93	26	2.36735
chr9	15333320	15333820	Intergenic	Intergenic	-26212	NM_152574	158219	Hs.563630	NM_152574	ENSG00000155158	TTC39B	C9orf52	tetratricopeptide repeat domain 39B	protein-coding	4.22	2.27	2.07	29.65	27.85	21.66	23.18	2.79142
chr1	63173000	63173500	Intergenic	L2c|LINE|L2	-19211	NM_033407	85440	Hs.744927	NM_033407	ENSG00000116641	DOCK7	EIEE23|ZIR2	dedicator of cytokinesis 7	protein-coding	0.92	1.13	1.58	12.65	13.29	4.8	40.1	2.75223
chr8	42334221	42334721	intron (NM_006749, intron 1 of 10)	intron (NM_006749, intron 1 of 10)	24507	NM_001257180	6575	Hs.653173	NM_006749	ENSG00000168575	SLC20A2	GLVR-2|GLVR2|IBGC1|IBGC3|MLVAR|PIT-2|PIT2|RAM1|Ram-1	solute carrier family 20 member 2	protein-coding	3.3	2.59	2.27	21.98	16.93	58.78	29.13	2.47426
chr19	41426940	41427440	Intergenic	Intergenic	-2980	NR_001278	1556	Hs.529117	NR_001278	ENSG00000256612	CYP2B7P	CYP2B|CYP2B7|CYP2B7P1	cytochrome P450 family 2 subfamily B member 7, pseudogene	pseudo	1.1	5.5	2.96	27.79	7.44	107.04	19.42	2.46229
chr20	29524981	29525481	Intergenic	Intergenic	45132	NR_133643	105379478	Hs.98121	NR_133643		LINC01598	-	long intergenic non-protein coding RNA 1598	ncRNA	4.77	4.69	2.27	41.26	31.49	27.69	34.77	2.55962
chr11	85453927	85454427	intron (NM_001289608, intron 3 of 18)	intron (NM_001289608, intron 3 of 18)	14935	NM_001162951	54843	Hs.369520	NM_032379	ENSG00000137501	SYTL2	CHR11SYT|EXO4|PPP1R151|SGA72M|SLP2|SLP2A	synaptotagmin like 2	protein-coding	4.77	3.24	3.85	17.42	25.16	21.66	64.85	2.40868
chr18	53256874	53257374	promoter-TSS (NM_001243227)	promoter-TSS (NM_001243227)	-79	NM_001243228	6925	Hs.605153	NM_003199	ENSG00000196628	TCF4	E2-2|FECD3|ITF-2|ITF2|PTHS|SEF-2|SEF2|SEF2-1|SEF2-1A|SEF2-1B|SEF2-1D|TCF-4|bHLHb19	transcription factor 4	protein-coding	17.98	46.43	11.56	4.77	3.96	4.8	6.58	-3.05934
chr5	32574684	32575184	Intergenic	Intergenic	-10671	NM_006713	10923	Hs.229641	NM_006713	ENSG00000113387	SUB1	P15|PC4|p14	SUB1 homolog, transcriptional regulator	protein-coding	0.92	1.78	1.98	37.12	6.17	21.04	2.82	2.49019
chr9	116843013	116843513	Intergenic	Intergenic	-2511	NM_001633	259	Hs.436911	NM_001633	ENSG00000106927	AMBP	A1M|EDC1|HCP|HI30|IATIL|ITI|ITIL|ITILC|UTI	alpha-1-microglobulin/bikunin precursor	protein-coding	2.93	3.24	2.96	48.11	23.74	60.02	35.56	2.70209
chr5	6900891	6901391	Intergenic	Intergenic	-73107	NR_036242	100422999		NR_036242	ENSG00000283420	MIR4278	-	microRNA 4278	ncRNA	1.47	1.29	1.38	15.55	5.38	27.69	13.47	3.12637
chr2	111790241	111790741	intron (NM_001142807, intron 15 of 17)	intron (NM_001142807, intron 15 of 17)	82674	NR_122074	400997	Hs.652337	NR_122074	ENSG00000204581	ACOXL-AS1	-	ACOXL antisense RNA 1	ncRNA	3.67	5.66	2.67	53.5	29.6	78.74	37.44	2.7864
chr1	119503172	119503672	intron (NM_152380, intron 1 of 7)	intron (NM_152380, intron 1 of 7)	27054	NM_001330677	6913	Hs.146196	NM_152380	ENSG00000092607	TBX15	TBX14	T-box 15	protein-coding	2.93	2.91	3.46	44.17	17.25	48.57	20.83	2.63241
chr15	78305059	78305559	exon (NM_015079, exon 9 of 13)	exon (NM_015079, exon 9 of 13)	-18742	NR_026998	91450	Hs.406766	NR_026998		LOC91450	-	uncharacterized LOC91450	ncRNA	1.65	3.56	2.37	28.82	12.98	23.67	49.18	2.73208
chr5	17951825	17952325	Intergenic	L1PB1|LINE|L1	144692	NR_134287	646241	Hs.407197	NR_134286		LOC646241	-	uncharacterized LOC646241	ncRNA	12.11	21.36	7.51	10.78	2.22	4.95	3.92	-2.63155
chr2	120973793	120974293	Intergenic	Intergenic	6941	NM_024121	79134	Hs.376722	NM_024121	ENSG00000226479	TMEM185B	FAM11B	transmembrane protein 185B	protein-coding	3.49	3.24	1.19	35.25	20.89	74.25	48.71	3.33557
chr9	90184897	90185397	intron (NM_001288729, intron 2 of 25)	intron (NM_001288729, intron 2 of 25)	71697	NM_001288729	1612	Hs.380277	NM_004938	ENSG00000196730	DAPK1	DAPK	death associated protein kinase 1	protein-coding	1.47	0.97	0.69	15.14	9.18	22.89	20.83	3.57805
chr6	132928662	132929162	TTS (NR_028511)	TTS (NR_028511)	1529	NR_028511	9288	Hs.730091	NR_028511	ENSG00000179073	TAAR3	GPR57|GPR58|TAAR2	trace amine associated receptor 3 (gene/pseudogene)	pseudo	2.38	0.65	2.86	24.47	19.47	12.38	11.28	2.35001
chr20	52417270	52417770	Intergenic	Intergenic	74728	NR_002189	391257	Hs.449977	NR_002189		SUMO1P1	PIC1L|UBL2|UBL6	SUMO1 pseudogene 1	pseudo	4.04	2.43	2.17	16.17	16.93	94.67	14.57	2.45203
chr7	113585006	113585506	Intergenic	L1PBa|LINE|L1	-26174	NM_002711	5506	Hs.458309	NM_002711	ENSG00000154415	PPP1R3A	GM|PP1G|PPP1R3	protein phosphatase 1 regulatory subunit 3A	protein-coding	17.61	30.09	11.26	3.53	3.32	3.25	4.39	-3.55189
chr2	72342568	72343068	Intergenic	Intergenic	32173	NM_001277742	56603	Hs.91546	NM_019885	ENSG00000003137	CYP26B1	CYP26A2|P450RAI-2|P450RAI2|RHFCA	cytochrome P450 family 26 subfamily B member 1	protein-coding	20.73	68.6	10.67	4.15	1.58	15.16	4.54	-3.90163
chr7	89699494	89699994	intron (NR_110029, intron 2 of 2)	L1PA5|LINE|L1	-48970	NR_003551	442523	Hs.406964	NR_003551	ENSG00000235436	DPY19L2P4	-	DPY19L2 pseudogene 4	pseudo	0.92	4.21	2.47	78.59	4.91	17.48	11.43	3.45693
chr7	150504883	150505383	Intergenic	L1PA6|LINE|L1	-6685	NM_014020	28959	Hs.647090	NM_014020	ENSG00000106565	TMEM176B	LR8|MS4B2	transmembrane protein 176B	protein-coding	0.92	3.88	1.98	15.55	7.75	40.53	22.71	2.42038
chr5	148358507	148359007	Intergenic	Intergenic	83980	NM_024577	79628	Hs.483784	NM_024577	ENSG00000169247	SH3TC2	CMT4C|MNMN	SH3 domain and tetratricopeptide repeats 2	protein-coding	14.67	61.48	11.65	5.39	4.27	2.94	8.46	-2.95005
chr15	52199644	52200144	intron (NM_014547, intron 9 of 9)	intron (NM_014547, intron 9 of 9)	16423	NR_109775	100422556	Hs.664788	NR_109775		LOC100422556	-	LEO1 homolog, Paf1/RNA polymerase II complex component pseudogene	pseudo	5.32	6.8	2.86	48.11	14.88	60.64	39.63	2.33172
chr12	22428713	22429213	intron (NM_003034, intron 2 of 4)	intron (NM_003034, intron 2 of 4)	58685	NM_001304450	6489	Hs.408614	NM_003034	ENSG00000111728	ST8SIA1	GD3S|SIAT8|SIAT8-A|SIAT8A|ST8SiaI	ST8 alpha-N-acetyl-neuraminide alpha-2,8-sialyltransferase 1	protein-coding	20.36	62.61	11.85	0.83	1.58	6.5	3.13	-4.68769
chr11	92440265	92440765	intron (NM_001008781, intron 3 of 24)	intron (NM_001008781, intron 3 of 24)	208279	NR_135091	105369431	Hs.532389	NR_135091		LOC105369431	-	uncharacterized LOC105369431	ncRNA	11.19	27.02	7.6	1.45	2.06	6.65	4.39	-3.00489
chr20	47115388	47115888	Intergenic	MLT1D|LTR|ERVL-MaLR	126984	NR_026958	284749	Hs.299080	NR_026958	ENSG00000235621	LINC00494	-	long intergenic non-protein coding RNA 494	ncRNA	1.83	3.88	0.69	12.03	3.48	120.35	2.82	2.6957
chr3	150018480	150018980	intron (NR_110186, intron 1 of 3)	intron (NR_110186, intron 1 of 3)	22804	NR_110186	101928022	Hs.555199	NR_110186		LINC01214	-	long intergenic non-protein coding RNA 1214	ncRNA	2.02	1.78	1.78	10.58	23.42	14.54	13.16	2.36113
chr4	140941088	140941588	intron (NM_018717, intron 1 of 5)	intron (NM_018717, intron 1 of 5)	133895	NM_018717	55534	Hs.586165	NM_018717	ENSG00000196782	MAML3	CAGH3|ERDA3|GDN|MAM-2|MAM2|TNRC3	mastermind like transcriptional coactivator 3	protein-coding	0.55	0.65	1.19	9.54	9.34	10.05	16.13	3.73039
chr8	61760625	61761125	intron (NM_017780, intron 23 of 37)	intron (NM_017780, intron 23 of 37)	107057	NM_001316690	55636	Hs.20395	NM_017780	ENSG00000171316	CHD7	CRG|HH5|IS3|KAL5	chromodomain helicase DNA binding protein 7	protein-coding	15.96	26.21	9.58	1.87	1.42	29.08	7.05	-2.40298
chr4	57479208	57479708	Intergenic	Intergenic	43230	NM_001145459	84525	Hs.619396	NM_032495	ENSG00000171476	HOPX	CAMEO|HOD|HOP|LAGY|NECC1|OB1|SMAP31|TOTO	HOP homeobox	protein-coding	15.23	32.52	9.68	0.21	2.53	5.41	3.13	-3.65738
chr1	34451922	34452422	intron (NM_001281956, intron 3 of 70)	intron (NM_001281956, intron 3 of 70)	117615	NR_038372	402779	Hs.666207	NR_038372	ENSG00000231163	CSMD2-AS1	-	CSMD2 antisense RNA 1	ncRNA	13.57	40.77	9.48	3.32	2.69	23.2	5.48	-2.82047
chr8	11486005	11486505	Intergenic	Intergenic	-48173	NM_001308094	2626	Hs.243987	NM_002052	ENSG00000136574	GATA4	ASD2|TACHD|TOF|VSD1	GATA binding protein 4	protein-coding	2.75	2.59	4.44	593.04	24.53	36.97	29.92	4.58914
chr8	95315846	95316346	Intergenic	Intergenic	-41549	NM_005261	2669	Hs.654463	NM_005261	ENSG00000164949	GEM	KIR	GTP binding protein overexpressed in skeletal muscle	protein-coding	10.46	54.2	10.07	1.45	2.69	5.57	1.1	-4.03759
chr20	45259870	45260370	intron (NM_001193340, intron 2 of 12)	intron (NM_001193340, intron 2 of 12)	19980	NM_001193342	64849	Hs.655498	NM_022829	ENSG00000158296	SLC13A3	NADC3|SDCT2	solute carrier family 13 member 3	protein-coding	2.2	3.4	3.56	45.2	4.43	85.85	25.84	2.40765
chr15	91675279	91675779	intron (NM_001323040, intron 2 of 12)	MER51A|LTR|ERV1	30643	NM_001323040	9899	Hs.21754	NM_014848	ENSG00000185518	SV2B	HsT19680	synaptic vesicle glycoprotein 2B	protein-coding	0.92	1.29	1.98	23.22	3.01	13.61	3.76	2.56336
chr7	92832775	92833275	intron (NM_001346642, intron 4 of 9)	intron (NM_001346642, intron 4 of 9)	15883	NM_198151	253012	Hs.443169	NM_198151	ENSG00000188175	HEPACAM2	MIKI	HEPACAM family member 2	protein-coding	2.02	4.21	2.17	37.12	9.02	8.51	21.93	2.40053
chr2	66573275	66573775	Intergenic	Intergenic	11935	NR_039938	100616464		NR_039938	ENSG00000264525	MIR4778	-	microRNA 4778	ncRNA	18.34	31.06	8	6.64	2.53	16.4	3.76	-2.63267
chr20	23080974	23081474	Intergenic	Intergenic	-14247	NM_012072	22918	Hs.97199	NM_012072	ENSG00000125810	CD93	C1QR1|C1qR(P)|C1qRP|CDw93|ECSM3|MXRA4|dJ737E23.1	CD93 molecule	protein-coding	18.53	36.56	7.8	2.9	4.27	3.87	3.76	-3.48105
chr10	73857476	73857976	intron (NR_045564, intron 9 of 9)	intron (NR_045564, intron 9 of 9)	-8936	NM_001134434	9806	Hs.523009	NM_014767	ENSG00000107742	SPOCK2	testican-2	SPARC/osteonectin, cwcv and kazal like domains proteoglycan 2	protein-coding	0.92	3.07	2.17	22.19	19.31	22.28	31.8	2.74461
chr9	71578939	71579439	intron (NR_110647, intron 1 of 2)	intron (NR_110647, intron 1 of 2)	11568	NR_110647	101927069	Hs.663405	NR_110647		LOC101927069	-	uncharacterized LOC101927069	ncRNA	1.28	3.07	1.09	30.27	5.22	23.36	6.74	2.50014
chr11	59474276	59474776	Intergenic	LTR3|LTR|ERVK	6792	NM_001005324	390201	Hs.589001	NM_001005324	ENSG00000172289	OR10V1	OR11-256	olfactory receptor family 10 subfamily V member 1	protein-coding	1.28	2.43	1.28	11.61	8.7	19.65	16.76	2.48975
chr14	20748323	20748823	Intergenic	L1PA4|LINE|L1	25580	NM_138376	91875	Hs.98553	NM_138376	ENSG00000136319	TTC5	Strap	tetratricopeptide repeat domain 5	protein-coding	0.18	1.46	0.99	32.14	6.33	8.04	14.25	3.58468
chr8	87250174	87250674	Intergenic	LTR22A|LTR|ERVK	-7820	NM_138817	157724	Hs.149095	NM_138817	ENSG00000164893	SLC7A13	AGT-1|AGT1|XAT2	solute carrier family 7 member 13	protein-coding	2.02	1.62	1.28	13.06	14.4	26.76	6.11	2.50852
chr7	23799650	23800150	intron (NM_032944, intron 10 of 23)	intron (NM_032944, intron 10 of 23)	49955	NM_001260504	56164	Hs.309767	NM_031414	ENSG00000196335	STK31	SGK396|TDRD8	serine/threonine kinase 31	protein-coding	1.1	1.46	1.48	9.12	2.85	9.9	28.04	2.40613
chr7	23114528	23115028	Intergenic	Intergenic	30544	NR_046220	100775104		NR_046220	ENSG00000230658	KLHL7-AS1	PLATAK	KLHL7 antisense RNA 1 (head to head)	ncRNA	1.47	2.1	0.99	11.2	6.96	5.41	23.03	2.39744
chr15	89158469	89158969	Intergenic	Intergenic	-3564	NR_039867	100616238		NR_039867	ENSG00000283484	MIR3529	mir-3529	microRNA 3529	ncRNA	1.65	1.46	1.48	47.69	16.78	17.94	28.82	3.71571
chr13	64306037	64306537	intron (NR_047011, intron 1 of 3)	intron (NR_047011, intron 1 of 3)	-5281	NR_002171	283491	Hs.363054	NR_002171		OR7E156P	-	olfactory receptor family 7 subfamily E member 156 pseudogene	pseudo	1.65	2.59	2.77	30.9	22.32	25.37	24.9	2.59459
chr17	67043369	67043869	intron (NM_080283, intron 3 of 38)	LTR4|LTR|ERV1	13517	NM_080283	10350	Hs.131686	NM_080283	ENSG00000154258	ABCA9	EST640918	ATP binding cassette subfamily A member 9	protein-coding	1.28	1.94	0.79	20.94	9.02	12.99	15.51	2.6075
chr20	35931906	35932406	intron (NM_022077, intron 3 of 3)	MER68|LTR|ERVL	14105	NM_022077	63905	Hs.6126	NM_022077	ENSG00000101363	MANBAL	-	mannosidase beta like	protein-coding	3.12	2.91	0.99	25.92	14.4	19.03	18.01	2.53455
chr2	14428096	14428596	intron (NR_103814, intron 2 of 3)	intron (NR_103814, intron 2 of 3)	112736	NR_103814	100499171	Hs.565606	NR_103814	ENSG00000230448	LINC00276	NCRNA00276	long intergenic non-protein coding RNA 276	ncRNA	20.36	40.61	6.81	3.53	1.9	15.62	9.24	-2.77743
chr2	236617743	236618243	intron (NM_001037131, intron 2 of 17)	intron (NM_001037131, intron 2 of 17)	203598	NR_131900	100506749	Hs.684184	NR_131900	ENSG00000235529	AGAP1-IT1	-	AGAP1 intronic transcript 1	ncRNA	3.3	7.28	3.85	53.29	35.29	147.42	111.68	3.25625
chr9	11064876	11065376	Intergenic	LTR9|LTR|ERV1	451920	NR_110696	101929428	Hs.434446	NR_110696	ENSG00000226717	PTPRD-AS2	-	PTPRD antisense RNA 2 (head to head)	ncRNA	2.2	2.27	3.26	21.57	38.93	32.64	47.93	3.08093
chr20	50510657	50511157	Intergenic	Intergenic	-31455	NR_110016	101927678	Hs.683840	NR_110016	ENSG00000227964	LINC01429	-	long intergenic non-protein coding RNA 1429	ncRNA	0.73	1.62	1.98	3.73	2.69	94.98	3.29	2.34821
chr13	30646372	30646872	Intergenic	Intergenic	36390	NR_046998	100874146	Hs.574116	NR_046998	ENSG00000224511	LINC00365	-	long intergenic non-protein coding RNA 365	ncRNA	6.05	11.33	4.05	101.6	40.83	25.21	64.22	2.33481
chr11	80957909	80958409	Intergenic	MIRb|SINE|MIR	-484313	NR_120570	101928944	Hs.547927	NR_120570	ENSG00000255178	LOC101928944	-	uncharacterized LOC101928944	ncRNA	1.28	1.29	0.89	33.59	11.71	8.97	19.74	3.22509
chr2	84713392	84713892	Intergenic	Intergenic	-27056	NM_003849	8802	Hs.270428	NM_003849	ENSG00000163541	SUCLG1	GALPHA|MTDPS9|SUCLA1	succinate-CoA ligase alpha subunit	protein-coding	2.93	2.59	1.28	41.89	9.81	35.58	47.3	2.88567
chr11	11879176	11879676	intron (NM_017944, intron 1 of 26)	MER51A|LTR|ERV1	16456	NM_001330208	55031	Hs.577256	NM_017944	ENSG00000170242	USP47	TRFP	ubiquitin specific peptidase 47	protein-coding	2.2	0.97	1.58	25.09	2.22	32.64	20.68	2.51729
chr1	233379858	233380358	intron (NM_014801, intron 8 of 33)	intron (NM_014801, intron 8 of 33)	51351	NM_014801	80003	Hs.370605	NM_014801	ENSG00000135749	PCNX2	PCNXL2	pecanex homolog 2 (Drosophila)	protein-coding	1.83	0.97	1.78	10.37	7.28	8.82	19.11	2.39472
chr2	219095550	219096050	intron (NM_005731, intron 3 of 9)	intron (NM_005731, intron 3 of 9)	13680	NM_005731	10109	Hs.529303	NM_005731	ENSG00000163466	ARPC2	ARC34|PNAS-139|PRO2446|p34-Arc	actin related protein 2/3 complex subunit 2	protein-coding	3.67	2.27	2.57	21.98	19.78	49.96	15.66	2.3432
chr2	114588715	114589215	non-coding (NR_110174, exon 5 of 5)	non-coding (NR_110174, exon 5 of 5)	-58546	NR_102318	10096	Hs.433512	NM_005721	ENSG00000115091	ACTR3	ARP3	ARP3 actin related protein 3 homolog	protein-coding	5.14	26.86	4.94	1.45	3.48	8.82	0.94	-2.67025
chr1	88526711	88527211	Intergenic	Intergenic	-622866	NM_001320709	5586	Hs.440833	NM_006256	ENSG00000065243	PKN2	PAK2|PRK2|PRKCL2|PRO2042|Pak-2|STK7	protein kinase N2	protein-coding	11.01	25.72	6.42	4.56	2.22	7.27	4.39	-3.06677
chr15	29963145	29963645	Intergenic	MER21C|LTR|ERVL	-3744	NR_135221	100130111	Hs.525720	NR_135221	ENSG00000256802	LOC100130111	-	uncharacterized LOC100130111	ncRNA	6.79	4.69	3.36	32.56	30.23	74.56	57.95	2.53221
chr1	74446263	74446763	Intergenic	Intergenic	217358	NM_001322315	127255	Hs.644625	NM_145258	ENSG00000162620	LRRIQ3	LRRC44	leucine rich repeats and IQ motif containing 3	protein-coding	1.1	0	0.79	7.67	8.7	7.12	9.87	2.81237
chr7	21405808	21406308	Intergenic	Intergenic	-61594	NM_001326543	6671	Hs.88013	NM_003112	ENSG00000105866	SP4	HF1B|SPR-1	Sp4 transcription factor	protein-coding	1.1	1.13	0.79	8.29	7.91	9.75	21.62	2.55147
chr2	165794564	165795064	intron (NM_001199148, intron 5 of 10)	MIR|SINE|MIR	17221	NM_001199148	151258	Hs.658702	NM_173512	ENSG00000169507	SLC38A11	AVT2	solute carrier family 38 member 11	protein-coding	0.73	0.49	0.99	6.01	9.97	6.19	8.14	2.50278
chr12	71556991	71557491	Intergenic	Intergenic	-5462	NM_004616	7103	Hs.170563	NM_004616	ENSG00000127324	TSPAN8	CO-029|TM4SF3	tetraspanin 8	protein-coding	0.37	1.13	1.48	20.32	16.93	18.72	27.57	3.27726
chr16	54881070	54881570	non-coding (NR_134971, exon 2 of 2)	non-coding (NR_134971, exon 2 of 2)	825	NR_134971	101927480	Hs.499208	NR_134971	ENSG00000245694	LOC101927480	-	uncharacterized LOC101927480	ncRNA	10.82	25.56	4.44	2.9	1.9	4.49	6.27	-2.85004
chr1	231045895	231046395	intron (NM_024525, intron 20 of 22)	intron (NM_024525, intron 20 of 22)	35553	NR_110681	101927604	Hs.638929	NR_110681	ENSG00000223393	LOC101927604	-	uncharacterized LOC101927604	ncRNA	6.24	26.53	6.52	2.49	2.06	3.71	4.23	-2.79012
chr6	114140556	114141056	Intergenic	Intergenic	-37708	NM_002356	4082	Hs.519909	NM_002356	ENSG00000277443	MARCKS	80K-L|MACS|PKCSL|PRKCSL	myristoylated alanine rich protein kinase C substrate	protein-coding	1.47	0.32	0.79	2.07	8.07	15.62	22.56	2.69647
chr8	29595972	29596472	intron (NR_026765, intron 1 of 3)	intron (NR_026765, intron 1 of 3)	9403	NR_026765	619351	Hs.566911	NR_026765	ENSG00000251191	LINC00589	C8orf75	long intergenic non-protein coding RNA 589	ncRNA	2.57	1.78	1.68	29.24	8.86	9.44	31.17	2.65567
chr3	71493150	71493650	intron (NM_001012505, intron 3 of 6)	intron (NM_001012505, intron 3 of 6)	97840	NR_031697	100302112		NR_031697	ENSG00000221264	MIR1284	MIRN1284|hsa-mir-1284|mir-1284	microRNA 1284	ncRNA	19.81	48.05	10.17	6.43	3.32	10.52	6.42	-3.34236
chr7	144527110	144527610	intron (NM_001042482, intron 2 of 7)	intron (NM_001042482, intron 2 of 7)	5786	NM_022445	27010	Hs.660232	NM_022445	ENSG00000196511	TPK1	HTPK1|PP20|THMD5	thiamin pyrophosphokinase 1	protein-coding	1.47	1.46	1.58	16.8	13.45	23.36	15.04	2.62574
chr7	94069958	94070458	Intergenic	MER61A|LTR|ERV1	46335	NM_000089	1278	Hs.489142	NM_000089	ENSG00000164692	COL1A2	OI4	collagen type I alpha 2 chain	protein-coding	1.83	2.1	2.86	38.78	7.28	19.8	16.92	2.46755
chr6	82484141	82484641	Intergenic	Intergenic	-21963	NM_017633	55603	Hs.10784	NM_017633	ENSG00000112773	FAM46A	C6orf37|XTP11	family with sequence similarity 46 member A	protein-coding	0.37	0.81	1.19	2.7	5.7	8.35	8.93	2.51092
chr1	16107215	16107715	intron (NM_001024216, intron 4 of 4)	intron (NM_001024216, intron 4 of 4)	16006	NM_001024216	54751	Hs.530101	NM_017556	ENSG00000162458	FBLIM1	CAL|FBLP-1|FBLP1	filamin binding LIM protein 1	protein-coding	3.3	0.65	2.37	19.91	23.26	46.25	24.28	2.48945
chr1	16275976	16276476	intron (NM_003443, intron 2 of 15)	intron (NM_003443, intron 2 of 15)	26401	NM_001324138	7709	Hs.433764	NM_003443	ENSG00000116809	ZBTB17	MIZ-1|ZNF151|ZNF60|pHZ-67	zinc finger and BTB domain containing 17	protein-coding	18.16	44.49	8.99	5.39	6.17	20.73	5.64	-2.38846
chr20	33914829	33915329	intron (NM_001184977, intron 5 of 7)	intron (NM_001184977, intron 5 of 7)	-34854	NM_178468	128876	Hs.592149	NM_178468	ENSG00000125998	FAM83C	C20orf128|dJ614O4.7	family with sequence similarity 83 member C	protein-coding	2.75	1.78	1.68	36.29	22	55.22	23.5	3.04703
chr8	98861992	98862492	intron (NM_018407, intron 6 of 6)	LTR41B|LTR|ERVL	-19007	NM_030583	4147	Hs.189445	NM_002380	ENSG00000132561	MATN2	-	matrilin 2	protein-coding	2.93	7.12	3.36	128.56	12.34	98.69	53.41	2.72231
chr2	121932317	121932817	Intergenic	Intergenic	110211	NM_014553	29842	Hs.156471	NM_014553	ENSG00000115112	TFCP2L1	CRTR1|LBP-9|LBP9	transcription factor CP2 like 1	protein-coding	11.74	36.4	8	2.07	3.64	9.28	2.82	-3.00425
chr11	39563364	39563864	Intergenic	L1M3b|LINE|L1	751066	NR_047674	57689	Hs.745123	NM_020929	ENSG00000148948	LRRC4C	NGL-1|NGL1	leucine rich repeat containing 4C	protein-coding	1.83	4.37	3.36	81.91	10.92	17.33	31.17	2.59117
chr6	71216800	71217300	intron (NM_001331004, intron 12 of 20)	intron (NM_001331004, intron 12 of 20)	-59575	NM_145267	135154	Hs.418495	NM_145267	ENSG00000154079	SDHAF4	C6orf57|Sdh8	succinate dehydrogenase complex assembly factor 4	protein-coding	1.1	1.13	1.28	22.6	10.6	10.52	9.87	3.02339
chr12	63154490	63154990	intron (NM_020700, intron 4 of 9)	Tigger15a|DNA|TcMar-Tigger	157274	NR_029661	406891		NR_029661	ENSG00000199179	MIRLET7I	LET7I|MIRNLET7I|hsa-let-7i|let-7i	microRNA let-7i	ncRNA	1.83	1.46	1.48	18.25	9.81	14.23	25.69	2.72109
chr2	177861729	177862229	Intergenic	Intergenic	-215443	NM_001330247	220988	Hs.516539	NM_194247	ENSG00000170144	HNRNPA3	2610510D13Rik|D10S102|FBRNP|HNRPA3	heterogeneous nuclear ribonucleoprotein A3	protein-coding	1.47	1.46	3.06	27.16	13.45	30.78	35.24	2.67549
chr11	113776999	113777499	intron (NM_006028, intron 1 of 8)	intron (NM_006028, intron 1 of 8)	1731	NM_006028	9177	Hs.241377	NM_006028	ENSG00000149305	HTR3B	5-HT3B	5-hydroxytryptamine receptor 3B	protein-coding	0.37	2.43	1.19	41.06	5.54	13.15	20.83	2.7088
chr5	37576119	37576619	intron (NM_001345998, intron 9 of 17)	L2a|LINE|L2	197007	NM_001345999	55100	Hs.213690	NM_018034	ENSG00000082068	WDR70	-	WD repeat domain 70	protein-coding	1.83	0.49	1.98	13.48	1.42	12.99	3.76	2.34872
chr4	183369889	183370389	intron (NM_001080477, intron 3 of 27)	CpG	205555	NM_001080477	55714	Hs.130438	NM_001080477	ENSG00000218336	TENM3	MCOPCB9|ODZ3|TNM3|Ten-m3|ten-3	teneurin transmembrane protein 3	protein-coding	13.57	51.61	12.25	3.94	3.32	43.93	4.86	-2.51195
chr5	108791356	108791856	Intergenic	Intergenic	-45931	NM_014819	9867	Hs.483036	NM_014819	ENSG00000198961	PJA2	Neurodap1|RNF131	praja ring finger ubiquitin ligase 2	protein-coding	17.98	53.55	10.07	9.12	3.01	6.81	6.58	-2.61474
chr20	49511591	49512091	intron (NM_015339, intron 4 of 4)	Tigger3|DNA|TcMar-Tigger	14487	NM_001282532	23394	Hs.293736	NM_015339	ENSG00000101126	ADNP	ADNP1|HVDAS|MRD28	activity dependent neuroprotector homeobox	protein-coding	1.1	0.97	1.09	14.51	8.86	31.71	32.11	3.58407
chr4	34734829	34735329	Intergenic	L2|LINE|L2	-693564	NR_125902	101928622	Hs.631687	NR_125902	ENSG00000250954	LOC101928622	-	uncharacterized LOC101928622	ncRNA	0.92	1.62	1.98	25.71	11.55	4.33	12.06	2.35184
chr3	193274550	193275050	Intergenic	Intergenic	-1889	NM_032279	84239	Hs.674423	NM_032279	ENSG00000127249	ATP13A4	-	ATPase 13A4	protein-coding	1.28	1.94	0.99	13.89	7.91	6.65	24.12	2.79386
chr5	31219101	31219601	intron (NM_004932, intron 1 of 11)	MLT2D|LTR|ERVL	25589	NM_004932	1004	Hs.124776	NM_004932	ENSG00000113361	CDH6	CAD6|KCAD	cadherin 6	protein-coding	1.65	1.78	4.25	52.88	10.92	21.97	3.45	2.34294
chr5	40411284	40411784	Intergenic	Intergenic	-268498	NM_000958	5734	Hs.199248	NM_000958	ENSG00000171522	PTGER4	EP4|EP4R	prostaglandin E receptor 4	protein-coding	15.59	30.58	5.73	3.11	2.06	3.71	3.76	-3.37623
chr9	95532828	95533328	Intergenic	Intergenic	-5995	NM_001003800	23299	Hs.436939	NM_015250	ENSG00000185963	BICD2	SMALED2|bA526D8.1	BICD cargo adaptor 2	protein-coding	21.46	72.32	9.58	6.22	2.53	15.62	10.34	-3.12397
chr4	5774918	5775418	intron (NM_153717, intron 11 of 20)	MLT1H|LTR|ERVL-MaLR	62244	NM_001306090	2121	Hs.646899	NM_014556	ENSG00000072840	EVC	DWF-1|EVC1|EVCL	EvC ciliary complex subunit 1	protein-coding	17.06	25.56	8.69	2.9	1.74	3.71	2.66	-3.84359
chr3	24565740	24566240	Intergenic	Intergenic	-3064	NR_039955	100616448		NR_039955	ENSG00000265028	MIR4792	miR-4792	microRNA 4792	ncRNA	3.67	3.56	2.37	28.62	25.16	12.68	48.09	2.49097
chr13	107128051	107128551	Intergenic	Intergenic	59087	NM_004093	1948	Hs.149239	NM_004093	ENSG00000125266	EFNB2	EPLG5|HTKL|Htk-L|LERK5	ephrin B2	protein-coding	1.65	1.46	1.88	17.83	13.77	20.26	18.33	3.65042
chr8	107072526	107073026	promoter-TSS (NR_125796)	promoter-TSS (NR_125796)	-45	NR_125796	102723356	Hs.571413	NR_125796		ZFPM2-AS1	-	ZFPM2 antisense RNA 1	ncRNA	1.47	2.43	2.77	25.5	7.12	2.94	42.92	2.57887
chr1	159940775	159941275	intron (NR_038849, intron 1 of 2)	MER77B|LTR|ERVL	10011	NR_038849	100505633	Hs.445045	NR_038849	ENSG00000224259	LINC01133	-	long intergenic non-protein coding RNA 1133	ncRNA	3.3	3.24	3.16	61.17	14.72	56.93	12.37	2.73464
chr4	166299930	166300430	promoter-TSS (NM_001873)	promoter-TSS (NM_001873)	86	NM_001873	1363	Hs.75360	NM_001873	ENSG00000109472	CPE	CPH	carboxypeptidase E	protein-coding	16.51	47.4	9.78	3.32	4.59	6.5	6.42	-2.88065
chr18	76822745	76823245	Intergenic	MER74A|LTR|ERVL	-6280	NM_001306085	374868	Hs.465475	NM_198531	ENSG00000166377	ATP9B	ATPASEP|ATPIIB|HUSSY-20|NEO1L|hMMR1	ATPase phospholipid transporting 9B (putative)	protein-coding	18.53	28.8	8.49	4.35	1.42	20.57	4.23	-2.6671
chr18	9638748	9639248	Intergenic	Intergenic	23736	NR_110774	101927323	Hs.151204	NR_110773	ENSG00000263627	PPP4R1-AS1	-	PPP4R1 antisense RNA 1	ncRNA	7.52	22.33	6.42	1.45	2.06	2.78	6.11	-2.96716
chr7	65345170	65345670	intron (NM_001284342, intron 1 of 1)	intron (NM_001284342, intron 1 of 1)	7334	NM_001284342	154807	Hs.427232	NM_173517	ENSG00000196715	VKORC1L1	-	vitamin K epoxide reductase complex subunit 1 like 1	protein-coding	0.92	0.97	1.09	5.6	5.22	10.83	18.48	2.89326
chr9	40071613	40072113	Intergenic	MIR|SINE|MIR	171517	NR_026803	401507	Hs.553802	NM_001012278	ENSG00000215112	FAM74A1	FAM74A5	family with sequence similarity 74 member A1	ncRNA	0	0	0	0.21	4.43	4.02	13.47	#NAME?
chr6	125566612	125567112	intron (NM_001003395, intron 3 of 6)	L1PBa|LINE|L1	42077	NM_001318907	7164	Hs.591347	NM_003287	ENSG00000111907	TPD52L1	D53	tumor protein D52-like 1	protein-coding	17.79	17.8	9.58	15.34	4.11	11.14	9.08	-2.51501
chr13	71878945	71879445	Intergenic	HAL1|LINE|L1	289922	NR_047699	100885781	Hs.372660	NR_047699	ENSG00000226846	LINC00348	-	long intergenic non-protein coding RNA 348	ncRNA	0.73	0.49	0.69	12.65	12.19	4.18	10.34	3.82605
chr6	20274456	20274956	Intergenic	L2b|LINE|L2	-62011	NM_001080480	154141	Hs.377830	NM_001080480	ENSG00000172197	MBOAT1	LPEAT1|LPLAT|LPLAT 1|LPSAT|OACT1|dJ434O11.1	membrane bound O-acyltransferase domain containing 1	protein-coding	2.38	0.97	2.47	28.41	16.46	3.25	37.59	2.66803
chr1	2507164	2507664	intron (NR_121638, intron 1 of 3)	intron (NR_121638, intron 1 of 3)	9440	NR_121638	100996583	Hs.444114	NR_121638	ENSG00000228037	LOC100996583	-	uncharacterized LOC100996583	ncRNA	4.04	11.81	7.21	30.27	32.44	158.86	83.96	2.32883
chr8	23039631	23040131	Intergenic	LOR1-int|LTR|ERV1	-18338	NM_003840	8793	Hs.213467	NM_003840	ENSG00000173530	TNFRSF10D	CD264|DCR2|TRAIL-R4|TRAILR4|TRUNDD	TNF receptor superfamily member 10d	protein-coding	1.1	1.78	1.68	13.89	13.14	26.45	17.39	3.14079
chr12	124723346	124723846	intron (NM_001204299, intron 3 of 4)	intron (NM_001204299, intron 3 of 4)	-50114	NM_181709	144347	Hs.432901	NM_181709	ENSG00000178882	RFLNA	CFM2|FAM101A	refilin A	protein-coding	1.83	2.59	2.07	21.15	21.84	13.3	35.09	2.85896
chr9	99153514	99154014	intron (NM_153695, intron 4 of 4)	L2a|LINE|L2	-7772	NM_001286990	11046	Hs.494556	NM_007001	ENSG00000130958	SLC35D2	HFRC1|SQV7L|UGTrel8|hfrc	solute carrier family 35 member D2	protein-coding	3.12	4.21	5.04	36.49	9.5	158.71	24.75	2.411
chr4	171147387	171147887	promoter-TSS (NR_125889)	promoter-TSS (NR_125889)	-105	NR_125889	101928223	Hs.254617	NR_125889		LINC01612	-	long intergenic non-protein coding RNA 1612	ncRNA	2.2	3.07	2.86	29.24	7.28	5.88	41.51	2.34586
chr18	51773416	51773916	Intergenic	Intergenic	-22183	NM_007195	11201	Hs.438533	NM_007195	ENSG00000101751	POLI	RAD30B|RAD3OB	DNA polymerase iota	protein-coding	19.99	20.39	6.52	1.04	2.06	9.13	2.66	-3.2813
chr4	55379297	55379797	Intergenic	Intergenic	93751	NR_134657	339978		NR_134657	ENSG00000250456	LOC339978	-	uncharacterized LOC339978	ncRNA	10.09	28.64	6.42	1.66	1.11	2.48	2.04	-4.24452
chr5	107753835	107754335	Intergenic	LTR27B|LTR|ERV1	-36286	NM_001163315	64839	Hs.657225	NM_022824	ENSG00000145743	FBXL17	FBXO13|Fbl17|Fbx13	F-box and leucine rich repeat protein 17	protein-coding	6.79	29.61	7.7	2.28	2.53	1.7	2.35	-3.89964
chr7	91388499	91388999	Intergenic	L1PA7|LINE|L1	121285	NM_001301135	7978	Hs.532216	NM_006980	ENSG00000127989	MTERF1	MTERF	mitochondrial transcription termination factor 1	protein-coding	6.6	8.9	5.93	134.78	13.77	41.15	63.91	2.39829
chr16	52598798	52599298	intron (NR_033920, intron 2 of 3)	intron (NR_033920, intron 2 of 3)	-17334	NM_001146188	27324	Hs.132574	NM_001080430	ENSG00000103460	TOX3	CAGF9|TNRC9	TOX high mobility group box family member 3	protein-coding	1.1	1.13	2.47	9.95	12.19	21.5	46.52	2.76761
chr2	20569871	20570371	Intergenic	MLT1H2|LTR|ERVL-MaLR	-19510	NM_015317	23369	Hs.467824	NM_015317	ENSG00000055917	PUM2	PUMH2|PUML2	pumilio RNA binding family member 2	protein-coding	15.59	33.49	6.52	1.66	2.53	4.95	1.57	-3.84822
chr13	23422600	23423100	Intergenic	CpG	49470	NR_033774	646201	Hs.729338	NR_033774		BASP1P1	-	brain abundant, membrane attached signal protein 1 pseudogene 1	pseudo	1.65	4.85	2.07	45	6.17	67.75	10.81	2.48549
chr6	167034488	167034988	intron (NM_001006932, intron 2 of 21)	intron (NM_001006932, intron 2 of 21)	6027	NM_021135	6196	Hs.655277	NM_021135	ENSG00000071242	RPS6KA2	HU-2|MAPKAPK1C|RSK|RSK3|S6K-alpha|S6K-alpha2|p90-RSK3|p90RSK2|pp90RSK3	ribosomal protein S6 kinase A2	protein-coding	3.85	5.02	2.77	77.14	7.6	33.57	37.28	2.38293
chr1	232814178	232814678	Intergenic	Intergenic	64033	NR_110683	101927683	Hs.520568	NR_110683	ENSG00000236497	LINC01744	-	long intergenic non-protein coding RNA 1744	ncRNA	3.12	8.74	2.17	17.21	14.56	66.52	77.53	2.39478
chr20	23317017	23317517	Intergenic	MER51A|LTR|ERV1	-14106	NM_013248	29107	Hs.516933	NM_013248	ENSG00000132661	NXT1	MTR2|P15	nuclear transport factor 2 like export factor 1	protein-coding	1.65	1.78	1.78	29.03	9.97	39.75	24.9	3.10058
chr8	19535811	19536311	intron (NR_024040, intron 1 of 9)	L3|LINE|CR1	4033	NM_018371	55790	Hs.613729	NM_018371	ENSG00000147408	CSGALNACT1	CSGalNAcT-1|ChGn|beta4GalNAcT	chondroitin sulfate N-acetylgalactosaminyltransferase 1	protein-coding	2.38	2.91	1.68	66.56	2.53	9.9	21.62	2.36801
chr4	165674955	165675455	promoter-TSS (NR_038834)	promoter-TSS (NR_038834)	-78	NR_038834	100505989	Hs.328236	NR_038834	ENSG00000248771	LINC01207	-	long intergenic non-protein coding RNA 1207	ncRNA	1.47	1.62	3.65	32.97	18.2	19.95	35.87	2.34229
chr12	85306383	85306883	promoter-TSS (NM_018057)	promoter-TSS (NM_018057)	-25	NM_001146335	55117	Hs.44424	NM_018057	ENSG00000072041	SLC6A15	NTT73|SBAT1|V7-3|hv7-3	solute carrier family 6 member 15	protein-coding	13.57	39.8	10.67	3.94	3.48	4.64	6.27	-3.3959
chr10	36111185	36111685	Intergenic	MLT1F|LTR|ERVL-MaLR	44205	NR_110138	102578074		NR_110138	ENSG00000280719	PCAT5	LINC01452|TPCAT-10-36067	prostate cancer associated transcript 5 (non-protein coding)	ncRNA	14.67	51.13	8.49	1.45	3.01	18.56	5.01	-3.01624
chr4	153406984	153407484	intron (NM_001257069, intron 2 of 3)	Tigger3b|DNA|TcMar-Tigger	3334	NR_036092	100422896		NR_036092	ENSG00000264678	MIR3140	mir-3140	microRNA 3140	ncRNA	3.3	2.43	0.89	17.42	8.86	16.4	29.6	2.41674
chr20	52453826	52454326	Intergenic	Intergenic	38172	NR_002189	391257	Hs.449977	NR_002189		SUMO1P1	PIC1L|UBL2|UBL6	SUMO1 pseudogene 1	pseudo	3.85	0.97	2.77	15.55	5.22	216.25	5.8	2.66921
chr20	48291839	48292339	intron (NM_004776, intron 1 of 8)	intron (NM_004776, intron 1 of 8)	38332	NM_004776	9334	Hs.370487	NM_004776	ENSG00000158470	B4GALT5	B4Gal-T5|BETA4-GALT-IV|beta4Gal-T5|beta4GalT-V|gt-V	beta-1,4-galactosyltransferase 5	protein-coding	3.49	2.27	1.48	23.43	16.93	55.07	19.89	2.48128
chr1	84367130	84367630	intron (NM_024686, intron 18 of 20)	L2a|LINE|L2	-40701	NR_119375	101927587	Hs.621230	NR_119375	ENSG00000233008	LINC01725	-	long intergenic non-protein coding RNA 1725	ncRNA	0.55	2.1	1.98	11.4	8.23	19.18	30.86	2.7242
chr1	39624177	39624677	intron (NM_012090, intron 1 of 92)	intron (NM_012090, intron 1 of 92)	74588	NM_012090	23499	Hs.472475	NM_012090	ENSG00000127603	MACF1	ABP620|ACF7|MACF|OFC4	microtubule-actin crosslinking factor 1	protein-coding	2.38	4.85	2.86	29.44	15.19	69.61	36.97	2.47437
chr7	32709693	32710193	intron (NR_036680, intron 5 of 16)	intron (NR_036680, intron 5 of 16)	48837	NR_036680	100129460	Hs.633705	NR_036680		DPY19L1P1	-	DPY19L1 pseudogene 1	pseudo	1.1	1.29	1.68	15.76	11.71	23.98	18.17	3.17332
chr5	144923500	144924000	Intergenic	MIR|SINE|MIR	291182	NM_138492	153768	Hs.314261	NM_138492	ENSG00000186314	PRELID2	-	PRELI domain containing 2	protein-coding	1.65	1.46	2.27	13.89	21.05	10.67	15.98	2.50512
chr5	518768	519268	intron (NM_004174, intron 1 of 16)	intron (NM_004174, intron 1 of 16)	5531	NM_004174	6550	Hs.658120	NM_004174	ENSG00000066230	SLC9A3	DIAR8|NHE-3|NHE3	solute carrier family 9 member A3	protein-coding	5.87	11.33	2.57	85.85	5.86	208.52	6.89	2.40476
chr17	31562160	31562660	intron (NM_001094, intron 1 of 9)	intron (NM_001094, intron 1 of 9)	57596	NM_183377	40	Hs.368417	NM_001094	ENSG00000108684	ASIC2	ACCN|ACCN1|ASIC2a|BNC1|BNaC1|MDEG|hBNaC1	acid sensing ion channel subunit 2	protein-coding	11.37	32.52	7.01	4.56	3.01	8.97	2.19	-2.67047
chr10	91697024	91697524	intron (NR_110655, intron 3 of 3)	L1PA5|LINE|L1	19856	NR_110655	101926924	Hs.500498	NR_110655	ENSG00000226159	LINC01375	-	long intergenic non-protein coding RNA 1375	ncRNA	14.67	36.24	5.73	3.11	2.06	0.46	1.25	-4.09287
chr10	134587570	134588070	intron (NM_005539, intron 12 of 15)	intron (NM_005539, intron 12 of 15)	11717	NM_177400	84504	Hs.134013	NM_177400	ENSG00000148826	NKX6-2	GTX|NKX6.2|NKX6B	NK6 homeobox 2	protein-coding	0.73	3.88	2.57	18.66	6.96	65.59	38.69	2.33964
chr20	52380323	52380823	Intergenic	Intergenic	111675	NR_002189	391257	Hs.449977	NR_002189		SUMO1P1	PIC1L|UBL2|UBL6	SUMO1 pseudogene 1	pseudo	3.3	2.43	2.27	14.93	16.93	140.15	27.57	2.69228
chr1	213006937	213007437	intron (NM_001024601, intron 2 of 2)	Tigger1|DNA|TcMar-Tigger	13804	NM_001024601	149643	Hs.153274	NM_001024601	ENSG00000185523	SPATA45	C1orf227	spermatogenesis associated 45	protein-coding	3.85	4.21	3.06	61.58	28.96	16.55	15.82	2.42819
chr12	19818353	19818853	Intergenic	MSTC-int|LTR|ERVL-MaLR	225088	NM_001267043	121536	Hs.126497	NM_153207	ENSG00000139154	AEBP2	-	AE binding protein 2	protein-coding	25.86	45.3	9.28	1.45	3.8	2.17	2.98	-3.98896
chr7	121354549	121355049	Intergenic	MIR|SINE|MIR	-158360	NM_001206838	5803	Hs.489824	NM_002851	ENSG00000106278	PTPRZ1	HPTPZ|HPTPzeta|PTP-ZETA|PTP18|PTPRZ|PTPZ|R-PTP-zeta-2|RPTPB|RPTPbeta|phosphacan	protein tyrosine phosphatase, receptor type Z1	protein-coding	1.28	1.13	1.09	31.73	33.24	26.92	41.82	4.10835
chr20	9369921	9370421	intron (NM_000933, intron 12 of 35)	L4|LINE|RTE	81724	NM_000933	5332	Hs.472101	NM_000933	ENSG00000101333	PLCB4	ARCND2|PI-PLC	phospholipase C beta 4	protein-coding	1.1	1.94	2.57	22.39	12.98	6.96	5.17	2.34273
chr3	115724196	115724696	intron (NM_002338, intron 3 of 6)	intron (NM_002338, intron 3 of 6)	-354425	NR_109998	101926903	Hs.26479	NR_109998	ENSG00000240922	LSAMP-AS1	-	LSAMP antisense RNA 1	ncRNA	6.6	23.78	7.01	2.28	3.64	4.64	2.04	-2.79452
chr15	63343366	63343866	intron (NM_001018008, intron 1 of 7)	intron (NM_001018008, intron 1 of 7)	2980	NM_001018008	7168	Hs.133892	NM_000366	ENSG00000140416	TPM1	C15orf13|CMD1Y|CMH3|HEL-S-265|HTM-alpha|LVNC9|TMSA	tropomyosin 1 (alpha)	protein-coding	2.75	4.53	1.88	24.26	21.84	42.54	43.07	2.78164
chr8	28041161	28041661	intron (NM_018091, intron 14 of 14)	intron (NM_018091, intron 14 of 14)	90827	NM_018091	55140	Hs.491336	NM_018091	ENSG00000134014	ELP3	KAT9	elongator acetyltransferase complex subunit 3	protein-coding	11.74	28.15	8	6.43	3.64	5.88	2.51	-2.64095
chr4	102806718	102807218	intron (NM_001127507, intron 4 of 15)	Tigger3a|DNA|TcMar-Tigger	71985	NM_001083907	55024	Hs.480400	NM_017935	ENSG00000153064	BANK1	BANK	B-cell scaffold protein with ankyrin repeats 1	protein-coding	0.73	1.94	1.98	12.23	9.81	10.67	17.54	2.37555
chr6	865780	866280	Intergenic	Intergenic	-2468	NR_110853	101927691	Hs.552556	NR_110853		LOC101927691	-	uncharacterized LOC101927691	ncRNA	2.38	1.62	1.78	15.97	19.15	3.4	41.82	2.3536
chr8	11570891	11571391	intron (NM_002052, intron 2 of 6)	L3|LINE|CR1	5776	NM_001308093	2626	Hs.243987	NM_002052	ENSG00000136574	GATA4	ASD2|TACHD|TOF|VSD1	GATA binding protein 4	protein-coding	2.38	1.94	2.77	130.63	9.34	10.67	8.14	3.20314
chr7	7029975	7030475	Intergenic	HERVS71-int|LTR|ERV1	76451	NR_037454	100500886		NR_037454	ENSG00000266287	MIR3683	-	microRNA 3683	ncRNA	0.55	0.97	2.27	11.4	8.23	23.67	13.16	2.6961
chr5	180542084	180542584	Intergenic	CpG	9970	NM_001258283	26693	Hs.742585	NM_001258283	ENSG00000185372	OR2V1	OR2V1P|OST265	olfactory receptor family 2 subfamily V member 1	protein-coding	4.59	34.14	5.33	5.6	2.22	6.96	0.16	-2.93487
chr12	96506381	96506881	Intergenic	Intergenic	-69333	NM_001256644	4048	Hs.524648	NM_000895	ENSG00000111144	LTA4H	-	leukotriene A4 hydrolase	protein-coding	1.65	2.27	3.06	43.13	9.02	32.64	13.16	2.5181
chr4	141229567	141230067	intron (NR_033939, intron 2 of 4)	intron (NR_033939, intron 2 of 4)	-34780	NM_001153446	60592	Hs.480815	NM_032547	ENSG00000153130	SCOC	HRIHFB2072|SCOCO|UNC-69	short coiled-coil protein	protein-coding	15.96	38.02	10.17	1.87	2.69	4.8	2.66	-3.65387
chr12	79960077	79960577	Intergenic	Intergenic	124463	NM_002583	5074	Hs.643130	NM_002583	ENSG00000177425	PAWR	PAR4|Par-4	pro-apoptotic WT1 regulator	protein-coding	1.28	1.46	1.38	10.37	6.81	10.21	13.47	2.57127
chr11	47530738	47531238	intron (NM_001330272, intron 1 of 15)	AluJo|SINE|Alu	14552	NM_001172639	10658	Hs.595333	NM_006560	ENSG00000149187	CELF1	BRUNOL2|CUG-BP|CUGBP|CUGBP1|EDEN-BP|NAB50|NAPOR|hNab50	CUGBP, Elav-like family member 1	protein-coding	3.85	2.43	2.96	25.71	14.24	29.08	49.5	2.59546
chr9	71355456	71355956	intron (NM_001278253, intron 1 of 13)	MIRb|SINE|MIR	35376	NM_003558	8395	Hs.534371	NM_003558	ENSG00000107242	PIP5K1B	MSS4|STM7	phosphatidylinositol-4-phosphate 5-kinase type 1 beta	protein-coding	3.12	5.82	1.78	30.27	18.99	64.35	43.54	2.6659
chr11	76797943	76798443	intron (NM_004055, intron 2 of 12)	intron (NM_004055, intron 2 of 12)	-15693	NM_006189	4975	Hs.673853	NM_006189	ENSG00000254550	OMP	-	olfactory marker protein	protein-coding	6.6	7.12	5.23	163.4	34.66	92.04	81.45	2.59457
chr2	159618124	159618624	Intergenic	Intergenic	-26860	NR_135242	100129029	Hs.630724	NR_135242	ENSG00000204380	PKP4-AS1	-	PKP4 antisense RNA 1	ncRNA	20.36	51.45	6.52	0.83	3.32	4.49	4.07	-3.74297
chr5	149012045	149012545	3' UTR (NM_001001669, exon 13 of 13)	3' UTR (NM_001001669, exon 13 of 13)	51160	NM_001001669	389337	Hs.256206	NM_001001669	ENSG00000183111	ARHGEF37	-	Rho guanine nucleotide exchange factor 37	protein-coding	7.34	13.75	4.44	167.34	31.18	31.71	59.52	2.38194
chr17	36605542	36606042	intron (NM_001199417, intron 1 of 23)	intron (NM_001199417, intron 1 of 23)	21072	NM_001199417	57636	Hs.374446	NM_020876	ENSG00000275832	ARHGAP23	-	Rho GTPase activating protein 23	protein-coding	19.63	36.56	5.73	2.28	4.43	24.6	3.29	-2.53919
chr7	80784981	80785481	Intergenic	Intergenic	-236564	NM_006379	10512	Hs.269109	NM_006379	ENSG00000075223	SEMA3C	SEMAE|SemE	semaphorin 3C	protein-coding	0.73	1.62	1.48	21.57	14.56	18.72	20.05	3.23672
chr18	49596537	49597037	Intergenic	Intergenic	-269755	NM_005215	1630	Hs.162025	NM_005215	ENSG00000187323	DCC	CRC18|CRCR1|IGDCC1|MRMV1|NTN1R1	DCC netrin 1 receptor	protein-coding	2.38	1.46	1.98	23.85	15.83	28.31	1.88	2.37328
chr1	47943213	47943713	Intergenic	L2c|LINE|L2	-40474	NR_126355	102724077	Hs.159718	NR_126355		LINC01389	-	long intergenic non-protein coding RNA 1389	ncRNA	2.93	3.07	2.07	30.69	12.19	36.35	29.29	2.50642
chr2	231914959	231915459	TTS (NM_001144994)	TTS (NM_001144994)	-6369	NM_001191037	5707	Hs.3887	NM_002807	ENSG00000173692	PSMD1	P112|Rpn2|S1	proteasome 26S subunit, non-ATPase 1	protein-coding	3.49	6.31	3.65	28.62	36.24	80.13	41.04	2.43104
chr3	171470743	171471243	intron (NM_002662, intron 1 of 26)	intron (NM_002662, intron 1 of 26)	57291	NM_001130081	5337	Hs.382865	NM_002662	ENSG00000075651	PLD1	-	phospholipase D1	protein-coding	23.66	52.26	10.17	4.35	3.32	22.58	5.01	-2.8866
chr4	78097750	78098250	Intergenic	Intergenic	19643	NM_004354	901	Hs.740456	NM_004354	ENSG00000138764	CCNG2	-	cyclin G2	protein-coding	9.54	28.96	8.39	1.45	3.17	10.05	2.82	-2.73006
chr12	10513625	10514125	Intergenic	LTR9B|LTR|ERV1	-2493	NR_120430	101928100	Hs.638425	NR_120430	ENSG00000245648	LOC101928100	-	uncharacterized LOC101928100	ncRNA	23.48	32.03	6.52	10.16	2.85	8.51	6.74	-2.4252
chr5	157987214	157987714	Intergenic	Intergenic	-150683	NR_109888	101927697	Hs.483960	NR_109888	ENSG00000276778	LOC101927697	-	uncharacterized LOC101927697	ncRNA	2.38	3.4	2.57	27.37	13.77	3.4	27.57	2.50305
chr20	6671539	6672039	Intergenic	L2b|LINE|L2	-76956	NM_001200	650	Hs.73853	NM_001200	ENSG00000125845	BMP2	BDA2|BMP2A	bone morphogenetic protein 2	protein-coding	2.38	1.78	1.78	32.14	30.55	16.24	13	3.15227
chr7	97739869	97740369	intron (NM_014916, intron 1 of 13)	intron (NM_014916, intron 1 of 13)	3922	NM_014916	22853	Hs.444179	NM_014916	ENSG00000164715	LMTK2	AATYK2|BREK|KPI-2|KPI2|LMR2|PPP1R100|cprk|hBREK	lemur tyrosine kinase 2	protein-coding	1.1	2.91	1.98	33.38	4.91	16.24	11.75	2.44308
chr12	89319839	89320339	Intergenic	MLT1K|LTR|ERVL-MaLR	93380	NR_038385	728084	Hs.132563	NR_038385	ENSG00000246363	LOC728084	-	uncharacterized LOC728084	ncRNA	3.49	1.94	1.38	22.81	20.26	9.59	23.81	2.6868
chr16	89900089	89900589	intron (NM_032451, intron 1 of 14)	intron (NM_032451, intron 1 of 14)	5432	NM_032451	84501	Hs.461786	NM_032451	ENSG00000204991	SPIRE2	Spir-2	spire type actin nucleation factor 2	protein-coding	6.24	4.37	3.36	57.44	16.3	111.22	68.76	2.68185
chr2	68667663	68668163	Intergenic	Intergenic	26536	NR_133923	554251	Hs.164117	NM_001024680	ENSG00000204923	FBXO48	-	F-box protein 48	protein-coding	3.3	0.97	1.98	19.91	9.5	14.54	30.7	2.58189
chr6	38877099	38877599	exon (NM_001206927, exon 65 of 93)	exon (NM_001206927, exon 65 of 93)	43534	NR_038401	100131047	Hs.670957	NR_038401		LOC100131047	-	uncharacterized LOC100131047	ncRNA	2.02	2.27	2.47	15.14	12.82	34.03	22.4	2.4949
chr19	58520879	58521379	Intergenic	CpG	-6415	NM_025027	80095	Hs.654967	NM_025027	ENSG00000166704	ZNF606	ZNF328	zinc finger protein 606	protein-coding	11.74	33.98	5.53	1.24	2.53	3.25	2.82	-3.44938
chr2	77245321	77245821	intron (NM_001282924, intron 3 of 3)	intron (NM_001282924, intron 3 of 3)	32480	NR_110284	101927907	Hs.382185	NR_110284	ENSG00000234653	LOC101927907	-	uncharacterized LOC101927907	ncRNA	1.1	0.65	1.09	25.5	2.53	0.62	8.14	2.55372
chr7	146778676	146779176	non-coding (NR_110829, exon 4 of 4)	non-coding (NR_110829, exon 4 of 4)	15775	NR_110829	101928700	Hs.571218	NR_110829	ENSG00000236795	LOC101928700	-	uncharacterized LOC101928700	ncRNA	1.28	1.94	2.47	24.05	15.83	17.02	16.45	2.37569
chr2	190406742	190407242	Intergenic	Intergenic	38545	NM_014585	30061	Hs.643005	NM_014585	ENSG00000138449	SLC40A1	FPN1|HFE4|IREG1|MST079|MSTP079|MTP1|SLC11A3	solute carrier family 40 member 1	protein-coding	3.12	1.78	3.85	42.09	26.27	37.13	30.7	2.37812
chr16	52485721	52486221	intron (NM_001146188, intron 4 of 7)	MER20|DNA|hAT-Charlie	94835	NM_001080430	27324	Hs.132574	NM_001080430	ENSG00000103460	TOX3	CAGF9|TNRC9	TOX high mobility group box family member 3	protein-coding	0.73	1.78	2.27	8.09	9.5	27.38	41.98	2.96262
chr6	155302084	155302584	Intergenic	Intergenic	-109089	NM_012454	26230	Hs.586279	NM_012454	ENSG00000146426	TIAM2	STEF|TIAM-2	T-cell lymphoma invasion and metastasis 2	protein-coding	2.38	1.94	2.27	32.35	23.42	33.88	44.01	3.15482
chr8	8959839	8960339	Intergenic	MIRc|SINE|MIR	48131	NM_024607	79660	Hs.458513	NM_024607	ENSG00000173281	PPP1R3B	GL|PPP1R4|PTG	protein phosphatase 1 regulatory subunit 3B	protein-coding	2.2	3.56	2.17	330.32	19.94	30.01	21.62	3.97078
chr9	79230084	79230584	intron (NM_001308047, intron 17 of 17)	intron (NM_001308047, intron 17 of 17)	76997	NM_001330680	158471	Hs.262857	NM_015225	ENSG00000106772	PRUNE2	BMCC1|BNIPXL|C9orf65|KIAA0367	prune homolog 2	protein-coding	0.55	2.27	1.38	17.42	20.57	14.7	24.12	3.49394
chr4	16142534	16143034	Intergenic	Intergenic	-57161	NM_001145848	8842	Hs.614734	NM_006017	ENSG00000007062	PROM1	AC133|CD133|CORD12|MCDR2|MSTP061|PROML1|RP41|STGD4	prominin 1	protein-coding	1.83	5.99	2.27	49.97	13.77	65.28	31.95	2.73955
chr1	192469641	192470141	Intergenic	L1PA2|LINE|L1	-74966	NM_002922	5996	Hs.75256	NM_002922	ENSG00000090104	RGS1	1R20|BL34|HEL-S-87|IER1|IR20	regulator of G-protein signaling 1	protein-coding	1.83	2.59	0.89	18.87	8.7	25.99	14.57	2.50924
chr1	165716721	165717221	intron (NR_045818, intron 5 of 6)	MIRb|SINE|MIR	21188	NM_001256165	54499	Hs.31498	NM_019026	ENSG00000143183	TMCO1	HP10122|PCIA3|PNAS-136|TMCC4	transmembrane and coiled-coil domains 1	protein-coding	1.28	0	1.19	13.48	19.31	14.23	4.39	3.39109
chr2	165567711	165568211	intron (NM_001278461, intron 6 of 12)	intron (NM_001278461, intron 6 of 12)	-23674	NR_033309	100337591	Hs.664357	NR_033309	ENSG00000206869	SNORA70F	U70F	small nucleolar RNA, H/ACA box 70F	snoRNA	1.47	0.97	0.49	14.72	14.88	11.14	18.48	3.05762
chr12	93708231	93708731	intron (NR_040096, intron 2 of 4)	intron (NR_040096, intron 2 of 4)	63031	NR_040096	643339	Hs.741299	NR_040096		LOC643339	-	uncharacterized LOC643339	ncRNA	3.85	2.91	2.86	40.02	25.96	74.71	36.65	2.7784
chr6	41487274	41487774	TTS (NR_120347)	TTS (NR_120347)	17342	NR_120347	103106903	Hs.563396	NR_120347	ENSG00000226917	LINC01276	-	long intergenic non-protein coding RNA 1276	ncRNA	2.75	2.43	1.68	68.64	17.73	54.14	42.6	3.04444
chr10	10953271	10953771	intron (NM_001326323, intron 3 of 17)	LTR86B1|LTR|ERVL	40605	NR_024410	254312	Hs.498620	NR_015413	ENSG00000229240	LINC00710	-	long intergenic non-protein coding RNA 710	ncRNA	6.05	30.9	5.43	4.15	3.64	4.64	2.35	-2.51979
chr20	40272111	40272611	Intergenic	Intergenic	-25228	NM_032221	84181	Hs.740645	NM_032221	ENSG00000124177	CHD6	CHD-6|CHD5|RIGB	chromodomain helicase DNA binding protein 6	protein-coding	5.32	5.5	2.17	41.47	17.09	34.5	40.57	2.45383
chr7	100511719	100512219	Intergenic	Intergenic	-18215	NM_001302622	43	Hs.154495	NM_000665	ENSG00000087085	ACHE	ACEE|ARACHE|N-ACHE|YT	acetylcholinesterase (Cartwright blood group)	protein-coding	1.47	5.02	3.26	25.92	12.82	37.9	42.45	2.38286
chr6	17741639	17742139	Intergenic	L1M2a|LINE|L1	34615	NR_134618	105374952	Hs.718703	NR_134616	ENSG00000272269	LOC105374952	-	uncharacterized LOC105374952	ncRNA	15.04	14.72	9.09	1.87	3.01	13.92	3.13	-2.41779
chr12	28210693	28211193	Intergenic	Intergenic	-86027	NM_198965	5744	Hs.591159	NM_002820	ENSG00000087494	PTHLH	BDE2|HHM|PLP|PTHR|PTHRP	parathyroid hormone like hormone	protein-coding	14.31	29.12	6.62	2.07	3.17	4.8	2.19	-3.59089
chr6	112013760	112014260	intron (NM_002037, intron 12 of 13)	intron (NM_002037, intron 12 of 13)	27255	NM_153047	2534	Hs.390567	NM_002037	ENSG00000010810	FYN	SLK|SYN|p59-FYN	FYN proto-oncogene, Src family tyrosine kinase	protein-coding	2.93	4.37	3.65	71.12	33.87	53.37	41.51	3.50451
chr7	30212541	30213041	Intergenic	Intergenic	38239	NM_152793	222166	Hs.200100	NM_152793	ENSG00000180354	MTURN	C7orf41|Ells1	maturin, neural progenitor differentiation regulator homolog	protein-coding	13.94	26.05	8.69	5.18	2.85	14.54	6.42	-2.57662
chr7	112212603	112213103	Intergenic	Intergenic	-45267	NR_110160	100996249	Hs.561749	NR_110159		LOC100996249	-	uncharacterized LOC100996249	ncRNA	1.47	2.43	1.78	30.48	18.99	14.7	23.03	2.5139
chr18	45479731	45480231	Intergenic	Intergenic	-22464	NM_001003652	4087	Hs.12253	NM_005901	ENSG00000175387	SMAD2	JV18|JV18-1|MADH2|MADR2|hMAD-2|hSMAD2	SMAD family member 2	protein-coding	11.19	15.86	5.33	2.07	3.8	4.8	4.86	-2.3282
chr8	9486548	9487048	intron (NM_003747, intron 3 of 26)	Charlie10b|DNA|hAT-Charlie	73353	NM_003747	8658	Hs.370267	NM_003747	ENSG00000173273	TNKS	ARTD5|PARP-5a|PARP5A|PARPL|TIN1|TINF1|TNKS1|pART5	tankyrase	protein-coding	1.1	1.29	1.28	41.06	4.43	3.87	13.31	3.08672
chr4	27128465	27128965	Intergenic	Intergenic	-90386	NR_125921	101929199	Hs.570815	NR_125921	ENSG00000249699	LOC101929199	-	uncharacterized LOC101929199	ncRNA	0.92	2.27	0.59	14.1	3.48	25.37	3.6	2.71937
chr13	28123373	28123873	intron (NM_153371, intron 9 of 9)	MIR|SINE|MIR	71097	NM_153371	222484	Hs.132359	NM_153371	ENSG00000139517	LNX2	PDZRN1	ligand of numb-protein X 2	protein-coding	0.92	0.81	2.37	20.94	7.75	38.21	11.59	2.34444
chr10	60228273	60228773	Intergenic	Intergenic	-44381	NM_001080512	80114	Hs.100261	NM_001080512	ENSG00000122870	BICC1	BICC|CYSRD	BicC family RNA binding protein 1	protein-coding	1.1	0.97	1.68	13.69	22.16	5.72	24.43	3.03531
chr4	25921259	25921759	intron (NM_001145432, intron 1 of 2)	intron (NM_001145432, intron 1 of 2)	5695	NM_001145432	389203	Hs.479386	NM_001145432	ENSG00000250317	SMIM20	C4orf52|MITRAC7	small integral membrane protein 20	protein-coding	1.28	1.46	1.58	9.12	7.6	9.59	21.77	2.69061
chr9	38211958	38212458	Intergenic	MIRc|SINE|MIR	-142998	NM_003028	6461	Hs.521482	NM_003028	ENSG00000107338	SHB	bA3J10.2	SH2 domain containing adaptor protein B	protein-coding	1.1	3.07	1.09	15.14	4.91	19.03	0.78	2.34
chr11	45757877	45758377	Intergenic	MLT1H|LTR|ERVL-MaLR	14269	NR_047569	100507384	Hs.259426	NR_047569	ENSG00000254519	LOC100507384	-	uncharacterized LOC100507384	ncRNA	12.11	26.37	4.74	1.04	2.37	6.5	3.13	-2.96217
chr12	68141614	68142114	Intergenic	Intergenic	-18609	NR_110063	101927901	Hs.369609	NR_110063	ENSG00000255970	LOC101927901	-	uncharacterized LOC101927901	ncRNA	3.12	3.88	3.46	49.56	27.85	56.31	48.56	2.65989
chr10	28676018	28676518	Intergenic	Intergenic	-84273	NR_134518	143098	Hs.499159	NM_173496	ENSG00000150054	MPP7	-	membrane palmitoylated protein 7	protein-coding	12.47	19.41	5.63	0.62	3.32	13.61	2.82	-2.36192
chr5	113697497	113697997	promoter-TSS (NM_001278204)	promoter-TSS (NM_001278204)	-269	NM_021614	3781	Hs.98280	NM_021614	ENSG00000080709	KCNN2	KCa2.2|SK2|SKCA2|SKCa 2|hSK2	potassium calcium-activated channel subfamily N member 2	protein-coding	15.23	37.53	14.42	4.35	2.85	1.7	4.7	-3.82287
chr3	71303315	71303815	intron (NM_001012505, intron 5 of 6)	intron (NM_001012505, intron 5 of 6)	-9249	NM_001244814	27086	Hs.59368	NM_032682	ENSG00000114861	FOXP1	12CC4|HSPC215|MFH|QRF1|hFKH1B	forkhead box P1	protein-coding	1.47	0.65	1.38	19.49	16.46	11.76	25.06	3.33495
chr8	8549331	8549831	Intergenic	Intergenic	-10085	NM_194284	137075	Hs.183617	NM_194284	ENSG00000253958	CLDN23	CLDNL|hCG1646163	claudin 23	protein-coding	2.75	1.94	1.78	27.99	14.24	5.26	13.78	2.58256
chr3	100791083	100791583	Intergenic	Intergenic	-78999	NM_015429	25890	Hs.477015	NM_015429	ENSG00000154175	ABI3BP	NESHBP|TARSH	ABI family member 3 binding protein	protein-coding	1.47	1.78	0.89	10.58	7.6	8.04	16.29	2.38574
chr19	53038937	53039437	intron (NM_001321424, intron 2 of 4)	CpG	8225	NM_001321424	388558	Hs.729294	NM_001039886	ENSG00000198482	ZNF808	-	zinc finger protein 808	protein-coding	13.21	33.17	7.21	4.35	3.32	5.26	4.07	-3.05621
chr9	109829945	109830445	intron (NR_126029, intron 3 of 4)	MER57B2|LTR|ERV1	35074	NR_126029	340512	Hs.432529	NR_126029	ENSG00000230782	LOC340512	-	uncharacterized LOC340512	ncRNA	1.28	2.43	2.67	25.09	6.01	20.88	31.01	2.4129
chr8	123733881	123734381	Intergenic	Intergenic	-27786	NR_126348	104266958	Hs.575540	NR_126348	ENSG00000253819	LINC01151	-	long intergenic non-protein coding RNA 1151	ncRNA	16.88	32.2	8.3	1.45	3.8	8.97	2.98	-3.11312
chr8	494706	495206	promoter-TSS (NM_001256113)	promoter-TSS (NM_001256113)	-111	NM_001256113	157695	Hs.289293	NM_175075	ENSG00000180190	TDRP	C8orf42|Inm01|TDRP1|TDRP2	testis development related protein	protein-coding	14.31	33.33	8.2	3.32	2.85	4.33	3.45	-3.37971
chr6	86115024	86115524	promoter-TSS (NR_134633)	promoter-TSS (NR_134633)	-754	NR_134633	101928820	Hs.587370	NR_134633	ENSG00000234155	LOC101928820	-	uncharacterized LOC101928820	ncRNA	2.93	2.59	3.85	47.69	28.49	26.14	29.6	2.49177
chr17	52984699	52985199	intron (NM_001321176, intron 4 of 16)	intron (NM_001321176, intron 4 of 16)	6897	NM_001321173	10040	Hs.153504	NM_005486	ENSG00000141198	TOM1L1	SRCASM	target of myb1 like 1 membrane trafficking protein	protein-coding	1.83	1.94	0.79	17.42	6.33	10.05	15.51	2.69256
chr6	168662550	168663050	non-coding (NR_110870, exon 5 of 5)	non-coding (NR_110870, exon 5 of 5)	19182	NR_110870	101929420	Hs.571211	NR_110870	ENSG00000234647	LOC101929420	-	uncharacterized LOC101929420	ncRNA	1.65	5.82	2.77	32.14	16.14	36.97	42.92	2.84579
chr2	4720588	4721088	Intergenic	LTR12F|LTR|ERV1	-17026	NR_034134	727982	Hs.444391	NR_034134	ENSG00000231532	LINC01249	-	long intergenic non-protein coding RNA 1249	ncRNA	2.38	2.27	1.48	57.85	5.54	27.53	14.57	3.19711
chr4	80956451	80956951	intron (NM_001145794, intron 8 of 15)	intron (NM_001145794, intron 8 of 15)	37776	NM_001145794	118429	Hs.162963	NM_058172	ENSG00000163297	ANTXR2	CMG-2|CMG2|HFS|ISH|JHF	anthrax toxin receptor 2	protein-coding	1.83	2.27	1.28	19.28	14.09	42.08	21.46	2.81126
chr3	90185920	90186420	Intergenic	MLT2B2|LTR|ERVL	1029496	NM_182644	2042	Hs.123642	NM_005233	ENSG00000044524	EPHA3	EK4|ETK|ETK1|HEK|HEK4|TYRO4	EPH receptor A3	protein-coding	0.73	0.65	1.98	24.26	13.77	13.77	16.13	3.06784
chr2	161695131	161695631	Intergenic	Intergenic	-298085	NM_133484	10010	Hs.132257	NM_004180	ENSG00000136560	TANK	I-TRAF|ITRAF|TRAF2	TRAF family member associated NFKB activator	protein-coding	1.1	0.81	1.28	19.28	9.97	11.14	21.3	3.01684
chr14	90114775	90115275	Intergenic	Intergenic	-29531	NM_001085471	1112	Hs.434286	NM_005197	ENSG00000053254	FOXN3	C14orf116|CHES1|PRO1635	forkhead box N3	protein-coding	1.83	0.97	1.09	13.48	8.23	6.34	21.3	2.56715
chr8	1878680	1879180	intron (NM_001308153, intron 26 of 29)	intron (NM_001308153, intron 26 of 29)	-40633	NR_126346	104266957	Hs.734498	NR_126346	ENSG00000253696	KBTBD11-OT1	-	KBTBD11 overlapping transcript 1	ncRNA	4.22	7.28	3.75	60.34	45.26	151.13	100.87	3.06704
chr14	84932000	84932500	Intergenic	Intergenic	-921369	NR_135155	105370605		NR_135155	ENSG00000258814	LOC105370605	-	uncharacterized LOC105370605	ncRNA	0.55	0.49	2.47	27.16	8.39	4.49	27.57	3.03342
chr2	8633392	8633892	Intergenic	UCON8|Unknown|Unknown	90280	NR_110257	101929567	Hs.634706	NR_110257	ENSG00000236008	LINC01814	-	long intergenic non-protein coding RNA 1814	ncRNA	2.38	5.02	1.28	20.11	23.58	23.51	15.51	2.54132
chr4	45649209	45649709	Intergenic	Tigger1|DNA|TcMar-Tigger	476623	NM_173536	2565	Hs.375051	NM_173536	ENSG00000163285	GABRG1	-	gamma-aminobutyric acid type A receptor gamma1 subunit	protein-coding	0.73	1.94	0.99	21.36	11.55	3.71	5.64	2.7478
chr1	222461343	222461843	Intergenic	MER54B|LTR|ERVL	259851	NM_024746	79802	Hs.665660	NM_024746	ENSG00000143512	HHIPL2	KIAA1822L	HHIP like 2	protein-coding	13.21	18.61	6.42	9.95	2.22	4.8	2.98	-2.4704
chr18	8882850	8883350	Intergenic	LTR10F|LTR|ERV1	165731	NM_015210	23255	Hs.707920	NM_015210	ENSG00000168502	MTCL1	CCDC165|KIAA0802|SOGA2	microtubule crosslinking factor 1	protein-coding	1.28	1.78	1.09	16.38	13.29	6.19	11.59	2.68066
chr11	94335974	94336474	intron (NM_152431, intron 12 of 19)	intron (NM_152431, intron 12 of 19)	35750	NM_152431	143689	Hs.660188	NM_152431	ENSG00000134627	PIWIL4	HIWI2|MIWI2	piwi like RNA-mediated gene silencing 4	protein-coding	4.59	4.85	1.38	27.16	21.52	22.12	28.98	2.76599
chr2	30009203	30009703	intron (NM_004304, intron 1 of 28)	L2c|LINE|L2	135024	NM_004304	238	Hs.654469	NM_004304	ENSG00000171094	ALK	CD246|NBLST3	anaplastic lymphoma receptor tyrosine kinase	protein-coding	1.47	1.46	1.78	6.84	5.7	12.38	74.71	3.58643
chr14	95715492	95715992	intron (NM_024734, intron 1 of 12)	MLT1J-int|LTR|ERVL-MaLR	70503	NM_024734	79789	Hs.301478	NM_024734	ENSG00000165959	CLMN	-	calmin	protein-coding	1.1	2.75	2.77	33.38	17.57	26.3	29.6	2.9497
chr6	105073339	105073839	Intergenic	Intergenic	233832	NM_001321084	57531	Hs.434340	NM_020771	ENSG00000085382	HACE1	SPPRS	HECT domain and ankyrin repeat containing E3 ubiquitin protein ligase 1	protein-coding	10.09	23.94	7.21	1.04	3.32	3.71	2.82	-3.20331
chr10	121031000	121031500	intron (NM_005308, intron 1 of 15)	MIR|SINE|MIR	64053	NM_005308	2869	Hs.524625	NM_005308	ENSG00000198873	GRK5	GPRK5	G protein-coupled receptor kinase 5	protein-coding	3.49	10.84	2.96	63.87	18.2	104.57	54.51	2.43401
chr3	53193340	53193840	Intergenic	Intergenic	-1633	NM_212539	5580	Hs.155342	NM_006254	ENSG00000163932	PRKCD	ALPS3|CVID9|MAY1|PKCD|nPKC-delta	protein kinase C delta	protein-coding	7.15	5.99	6.02	99.95	22.63	47.03	67.82	2.40691
chr8	114117347	114117847	intron (NM_052900, intron 4 of 68)	L1MEc|LINE|L1	271785	NM_198124	114788	Hs.91381	NM_052900	ENSG00000164796	CSMD3	-	CUB and Sushi multiple domains 3	protein-coding	1.83	1.46	0.4	13.06	10.29	12.07	25.69	3.32358
chr14	36853160	36853660	Intergenic	Intergenic	-63528	NM_001308110	51562	Hs.368647	NM_016586	ENSG00000151332	MBIP	-	MAP3K12 binding inhibitory protein 1	protein-coding	12.47	39.15	5.33	0.41	1.42	1.55	2.51	-4.02557
chr22	18056546	18057046	intron (NM_031481, intron 2 of 10)	intron (NM_031481, intron 2 of 10)	13657	NM_031481	83733	Hs.282982	NM_031481	ENSG00000182902	SLC25A18	GC2	solute carrier family 25 member 18	protein-coding	14.31	33.33	4.84	2.49	2.85	8.51	8.77	-2.46952
chr16	8869916	8870416	intron (NM_001127448, intron 13 of 15)	intron (NM_001127448, intron 13 of 15)	21339	NM_015421	25880	Hs.513330	NM_015421	ENSG00000184857	TMEM186	C16orf51	transmembrane protein 186	protein-coding	10.64	25.08	7.7	2.28	2.85	10.21	4.07	-2.5751
chr15	68564232	68564732	Intergenic	Intergenic	-5659	NM_015322	10116	Hs.362733	NM_015322	ENSG00000169018	FEM1B	F1A-ALPHA|F1AA|FEM1-beta	fem-1 homolog B	protein-coding	15.78	48.86	9.18	1.04	2.53	11.6	3.45	-3.31259
chr3	100796475	100796975	Intergenic	Intergenic	-84391	NM_015429	25890	Hs.477015	NM_015429	ENSG00000154175	ABI3BP	NESHBP|TARSH	ABI family member 3 binding protein	protein-coding	0.55	2.43	0.79	8.92	6.65	12.22	18.01	2.8825
chr5	142556780	142557280	intron (NM_015071, intron 20 of 22)	intron (NM_015071, intron 20 of 22)	-15035	NR_046816	100874372	Hs.666717	NR_046816	ENSG00000230789	ARHGAP26-IT1	-	ARHGAP26 intronic transcript 1	ncRNA	7.34	23.94	5.43	1.45	1.42	1.08	7.68	-2.70056
chrX	84614020	84614520	intron (NM_001307940, intron 4 of 15)	intron (NM_001307940, intron 4 of 15)	20478	NM_001307940	79983	Hs.267038	NM_024921	ENSG00000124429	POF1B	POF|POF2B	premature ovarian failure, 1B	protein-coding	0.55	0.32	1.58	10.58	6.33	20.11	1.88	2.37675
chr11	17994485	17994985	intron (NM_012139, intron 8 of 10)	intron (NM_012139, intron 8 of 10)	39974	NM_012139	26297	Hs.32470	NM_012139	ENSG00000129158	SERGEF	DELGEF|Gnefr	secretion regulating guanine nucleotide exchange factor	protein-coding	8.25	31.55	5.93	1.87	3.64	5.41	3.92	-2.8572
chr1	218838555	218839055	intron (NR_031644, intron 3 of 6)	intron (NR_031644, intron 3 of 6)	222837	NR_125715	103611157	Hs.133379	NR_125715	ENSG00000281453	TGFB2-OT1	-	TGFB2 overlapping transcript 1	ncRNA	8.99	12.78	6.22	2.49	3.01	1.86	3.76	-2.44099
chr6	80082921	80083421	Intergenic	Intergenic	-60070	NR_130915	80078		NR_130915		LCAL1	onco-lncRNA-27	lung cancer associated lncRNA 1	ncRNA	1.83	1.62	2.27	18.04	9.97	11.29	37.59	2.53936
chr1	193324270	193324770	intron (NR_125789, intron 3 of 3)	intron (NR_125789, intron 3 of 3)	50645	NR_125789	101929184	Hs.146728	NR_125789	ENSG00000232077	LINC01031	TCONS_00000361	long intergenic non-protein coding RNA 1031	ncRNA	2.38	1.13	1.58	16.38	16.14	9.44	23.5	3.02357
chr19	51227928	51228428	intron (NM_002975, intron 3 of 3)	CpG-14259	1573	NM_002975	6320	Hs.512680	NM_002975	ENSG00000105472	CLEC11A	CLECSF3|LSLCL|P47|SCGF	C-type lectin domain family 11 member A	protein-coding	41.46	90.44	14.12	5.81	4.59	13.46	4.7	-3.79186
chr6	137426542	137427042	Intergenic	MLT1J1-int|LTR|ERVL-MaLR	-60475	NM_014432	53832	Hs.445868	NM_014432	ENSG00000016402	IL20RA	CRF2-8|IL-20R-alpha|IL-20R1|IL-20RA	interleukin 20 receptor subunit alpha	protein-coding	13.21	31.06	5.14	2.49	2.22	1.55	3.29	-3.29182
chr8	38135564	38136064	intron (NM_023034, intron 22 of 23)	intron (NM_023034, intron 22 of 23)	-9076	NM_001102560	84513	Hs.567619	NM_032483	ENSG00000147535	PLPP5	DPPL1|HTPAP|PPAPDC1B	phospholipid phosphatase 5	protein-coding	0.92	1.46	1.09	8.71	10.76	18.87	12.69	2.71852
chr15	89655432	89655932	intron (NM_007011, intron 5 of 14)	intron (NM_007011, intron 5 of 14)	24301	NM_152924	11057	Hs.122337	NM_007011	ENSG00000140526	ABHD2	HS1-2|LABH2|PHPS1-2	abhydrolase domain containing 2	protein-coding	2.02	3.24	3.75	24.88	20.26	30.32	28.51	2.33909
chr9	75524291	75524791	exon (NM_000689, exon 11 of 13)	exon (NM_000689, exon 11 of 13)	-35516	NR_121120	101927258	Hs.586433	NR_121120	ENSG00000236849	LINC01474	-	long intergenic non-protein coding RNA 1474	ncRNA	1.28	0.65	1.48	4.15	14.09	4.18	22.71	2.57839
chr20	52271402	52271902	Intergenic	Intergenic	46759	NR_134576	105372672	Hs.259350	NR_134576	ENSG00000235415	LOC105372672	-	uncharacterized LOC105372672	ncRNA	2.38	0.81	1.78	6.22	9.97	53.52	8.77	2.40721
chr4	24765217	24765717	Intergenic	MLT1H1|LTR|ERVL-MaLR	-31618	NM_003102	6649	Hs.2420	NM_003102	ENSG00000109610	SOD3	EC-SOD	superoxide dismutase 3, extracellular	protein-coding	14.67	21.84	6.02	0.41	2.53	10.98	2.04	-2.9675
chr11	85467772	85468272	intron (NM_001289608, intron 1 of 18)	MIRc|SINE|MIR	1090	NM_001162951	54843	Hs.369520	NM_032379	ENSG00000137501	SYTL2	CHR11SYT|EXO4|PPP1R151|SGA72M|SLP2|SLP2A	synaptotagmin like 2	protein-coding	1.47	1.29	1.19	21.77	2.69	19.18	29.92	2.63081
chr3	11571500	11572000	intron (NM_001136031, intron 17 of 17)	intron (NM_001136031, intron 17 of 17)	38648	NM_001128221	9686	Hs.740389	NM_014667	ENSG00000144560	VGLL4	VGL-4	vestigial like family member 4	protein-coding	8.07	22.81	6.52	1.87	1.11	9.59	1.88	-3.23682
chrX	55172320	55172820	exon (NM_001166702, exon 3 of 3)	exon (NM_001166702, exon 3 of 3)	14965	NM_001166703	90736	Hs.415414	NM_138362	ENSG00000182518	FAM104B	CXorf44	family with sequence similarity 104 member B	protein-coding	9.54	15.86	11.36	0.83	4.75	3.25	1.57	-2.76038
chr3	82558131	82558631	Intergenic	MER52A|LTR|ERV1	-747431	NM_000158	2632	Hs.436062	NM_000158	ENSG00000114480	GBE1	APBD|GBE|GSD4	1,4-alpha-glucan branching enzyme 1	protein-coding	14.67	53.55	8.59	3.32	2.37	6.34	4.07	-3.62194
chr1	145246113	145246613	intron (NM_203458, intron 1 of 4)	intron (NM_203458, intron 1 of 4)	37250	NM_203458	388677	Hs.655156	NM_203458	ENSG00000264343	NOTCH2NL	N2N	notch 2 N-terminal like	protein-coding	0.73	0.65	0.89	2.7	2.85	15.62	19.11	2.8914
chrX	28005848	28006348	Intergenic	LTR22A|LTR|ERVK	-6532	NM_001017930	139425	Hs.447365	NM_001017930	ENSG00000226372	DCAF8L1	WDR42B	DDB1 and CUL4 associated factor 8 like 1	protein-coding	2.57	2.59	3.16	21.36	16.14	85.08	18.48	2.55278
chr20	38915639	38916139	Intergenic	Intergenic	282786	NR_109937	100505663	Hs.559348	NR_109936	ENSG00000237767	LINC01370	HI-LNC25|HILNC25	long intergenic non-protein coding RNA 1370	ncRNA	30.63	51.29	9.18	20.53	4.59	8.51	5.17	-2.74746
chr6	160675778	160676278	intron (NM_003058, intron 2 of 10)	intron (NM_003058, intron 2 of 10)	3935	NM_003058	6582	Hs.436385	NM_003058	ENSG00000112499	SLC22A2	OCT2	solute carrier family 22 member 2	protein-coding	5.14	2.91	2.57	31.1	19.94	76.11	26.16	2.43139
chr2	124490108	124490608	Intergenic	Intergenic	-292506	NM_130773	129684	Hs.660653	NM_130773	ENSG00000155052	CNTNAP5	caspr5	contactin associated protein like 5	protein-coding	0.92	0.32	0.99	9.12	5.7	1.08	13.47	2.92783
chr5	162110148	162110648	Intergenic	Intergenic	615750	NM_198904	2566	Hs.7195	NM_000816	ENSG00000113327	GABRG2	CAE2|ECA2|GEFSP3	gamma-aminobutyric acid type A receptor gamma2 subunit	protein-coding	1.83	0.97	0.79	33.18	3.8	3.25	2.51	2.61735
chr11	76786526	76787026	intron (NM_004055, intron 1 of 12)	L1ME3A|LINE|L1	8784	NM_004055	726	Hs.248153	NM_004055	ENSG00000149260	CAPN5	ADNIV|HTRA3|VRNI|nCL-3	calpain 5	protein-coding	4.77	4.53	1.88	51.63	16.93	48.11	69.08	2.84444
chr1	77013528	77014028	intron (NM_152996, intron 3 of 4)	intron (NM_152996, intron 3 of 4)	-319315	NM_001320274	81849	Hs.149201	NM_030965	ENSG00000117069	ST6GALNAC5	SIAT7-E|SIAT7E|ST6GalNAcV	ST6 N-acetylgalactosaminide alpha-2,6-sialyltransferase 5	protein-coding	1.83	3.4	2.27	39.4	9.34	43.47	16.92	3.06212
chr9	111365357	111365857	Intergenic	Intergenic	252668	NM_006686	10880	Hs.534390	NM_006686	ENSG00000148156	ACTL7B	Tact1	actin like 7B	protein-coding	15.23	36.08	7.41	2.07	2.06	19.03	3.76	-3.14569
chr13	61047714	61048214	intron (NM_001146070, intron 5 of 13)	LTR13|LTR|ERVK	76537	NM_001146070	81550	Hs.525061	NM_030794	ENSG00000083544	TDRD3	-	tudor domain containing 3	protein-coding	2.02	2.91	3.06	43.75	3.48	44.86	7.36	2.4164
chr18	40099961	40100461	intron (NR_046454, intron 6 of 6)	intron (NR_046454, intron 6 of 6)	333578	NR_046457	284260	Hs.652819	NR_046174	ENSG00000267586	LINC00907	-	long intergenic non-protein coding RNA 907	ncRNA	0.55	0	2.17	16.38	21.05	5.26	9.4	3.35832
chr2	158252242	158252742	Intergenic	Intergenic	48112	NM_004288	9595	Hs.270	NM_004288	ENSG00000115165	CYTIP	B3-1|CASP|CYBR|CYTHIP|HE|PSCDBP	cytohesin 1 interacting protein	protein-coding	0.73	0.65	1.48	4.15	6.17	13.61	35.56	2.92551
chr3	149756584	149757084	Intergenic	MER51A|LTR|ERV1	-57396	NR_136187	105374313	Hs.151216	NR_136187		LOC105374313	-	uncharacterized LOC105374313	ncRNA	1.47	1.29	2.96	33.59	6.17	28.15	12.37	2.57635
chr5	147214892	147215392	intron (NM_003122, intron 1 of 4)	intron (NM_003122, intron 1 of 4)	3652	NM_003122	6690	Hs.407856	NM_003122	ENSG00000164266	SPINK1	PCTT|PSTI|Spink3|TATI|TCP	serine peptidase inhibitor, Kazal type 1	protein-coding	0.73	0.49	2.77	11.2	19.31	4.8	14.88	2.46223
chr1	15556275	15556775	Intergenic	MER20|DNA|hAT-Charlie	-17243	NM_052929	114827	Hs.659997	NM_052929	ENSG00000142621	FHAD1	-	forkhead associated phosphopeptide binding domain 1	protein-coding	1.1	2.75	1.88	9.75	24.06	43.62	37.75	3.40796
chr1	16886100	16886600	Intergenic	AluSq2|SINE|Alu	10941	NR_037446	100500876		NR_037446	ENSG00000263811	MIR3675	-	microRNA 3675	ncRNA	12.29	14.72	12.35	1.45	3.48	11.76	5.33	-2.56618
chr9	14961442	14961942	Intergenic	MER51A|LTR|ERV1	-31633	NR_003920	389705	Hs.431257	NR_003920		LOC389705	-	chromosome 4 open reading frame 27 pseudogene	pseudo	2.2	2.75	2.86	27.99	7.6	55.69	16.45	2.52328
chr6	49882674	49883174	Intergenic	Intergenic	34233	NM_001166478	403339	Hs.558270	NM_001166478	ENSG00000214643	DEFB133	-	defensin beta 133	protein-coding	14.67	15.37	4.74	2.07	4.59	3.87	2.04	-2.44256
chr9	75594191	75594691	Intergenic	Intergenic	-26208	NM_000689	216	Hs.76392	NM_000689	ENSG00000165092	ALDH1A1	ALDC|ALDH-E1|ALDH1|ALDH11|HEL-9|HEL-S-53e|HEL12|PUMB1|RALDH1	aldehyde dehydrogenase 1 family member A1	protein-coding	1.83	0.32	1.38	20.74	14.56	10.36	27.72	3.31535
chr2	106002214	106002714	intron (NM_001318899, intron 3 of 7)	intron (NM_001318899, intron 3 of 7)	13111	NM_001039492	2274	Hs.443687	NM_001450	ENSG00000115641	FHL2	AAG11|DRAL|FHL-2|SLIM-3|SLIM3	four and a half LIM domains 2	protein-coding	2.75	2.43	2.77	7.26	26.43	24.13	51.38	2.92592
chr9	102151456	102151956	Intergenic	Intergenic	-14167	NR_102271	100996569	Hs.745280	NR_102270	ENSG00000271086	NAMA	-	non-protein coding RNA, associated with MAP kinase pathway and growth arrest	ncRNA	13.94	28.8	6.62	4.15	3.17	8.97	2.35	-2.50284
chr9	79228792	79229292	non-coding (NR_131751, exon 16 of 16)	non-coding (NR_131751, exon 16 of 16)	78289	NM_001330680	158471	Hs.262857	NM_015225	ENSG00000106772	PRUNE2	BMCC1|BNIPXL|C9orf65|KIAA0367	prune homolog 2	protein-coding	1.83	1.13	1.09	13.27	12.19	9.75	8.61	2.35476
chr1	212352917	212353417	Intergenic	Intergenic	54911	NR_125982	101929541	Hs.632493	NR_125982	ENSG00000226251	LOC101929541	-	uncharacterized LOC101929541	ncRNA	16.51	31.06	7.01	2.28	1.27	6.34	3.92	-3.50315
chr11	94978159	94978659	Intergenic	Intergenic	-12704	NM_001271594	143686	Hs.120633	NM_144665	ENSG00000149212	SESN3	SEST3	sestrin 3	protein-coding	9.91	23.62	5.33	2.07	4.11	4.95	1.57	-2.70948
chr2	106199323	106199823	Intergenic	Intergenic	27443	NR_038891	285000	Hs.737917	NR_038891		LOC285000	-	uncharacterized LOC285000	ncRNA	3.49	2.75	2.17	25.3	21.52	30.78	45.89	2.84683
chr10	58077357	58077857	Intergenic	LTR27B|LTR|ERV1	43427	NM_007057	11130	Hs.591363	NM_007057	ENSG00000122952	ZWINT	HZwint-1|KNTC2AP|SIP30|ZWINT1	ZW10 interacting kinetochore protein	protein-coding	15.41	27.18	9.09	1.87	2.06	1.08	3.13	-3.82449
chr13	85568649	85569149	Intergenic	Intergenic	153293	NR_126383	104355140		NR_126383	ENSG00000226370	LINC00375	-	long intergenic non-protein coding RNA 375	ncRNA	2.38	0.32	0.2	23.43	15.67	10.98	9.71	3.15005
chr12	6989707	6990207	intron (NR_135083, intron 2 of 3)	AluJr|SINE|Alu	-3188	NR_002803	283345	Hs.720698	NR_002803	ENSG00000240370	RPL13P5	RPL13-2|RPL13L|RPL13_4_1199|RRPL13L	ribosomal protein L13 pseudogene 5	pseudo	2.02	1.62	1.88	6.22	8.23	45.48	22.71	2.44315
chr4	145789455	145789955	Intergenic	HAL1|LINE|L1	-222534	NR_037595	646576	Hs.632595	NR_037595	ENSG00000248890	HHIP-AS1	-	HHIP antisense RNA 1	ncRNA	0.73	0.97	1.09	18.45	3.8	12.99	7.52	2.53723
chr7	134058994	134059494	Intergenic	MIRc|SINE|MIR	-57417	NM_032826	84912	Hs.490181	NM_032826	ENSG00000205060	SLC35B4	YEA|YEA4	solute carrier family 35 member B4	protein-coding	3.85	2.27	2.37	17.83	20.1	13.61	38.53	2.3322
chr5	31221064	31221564	intron (NM_004932, intron 1 of 11)	intron (NM_004932, intron 1 of 11)	27552	NM_004932	1004	Hs.124776	NM_004932	ENSG00000113361	CDH6	CAD6|KCAD	cadherin 6	protein-coding	2.02	1.94	1.78	29.44	14.88	11.45	19.74	2.9852
chr20	49934627	49935127	Intergenic	MLT1G3|LTR|ERVL-MaLR	134637	NR_036162	100422889		NR_036162	ENSG00000266761	MIR3194	mir-3194	microRNA 3194	ncRNA	2.93	4.69	3.06	21.57	5.86	176.03	6.11	2.61347
chr14	56691701	56692201	intron (NM_021255, intron 2 of 5)	intron (NM_021255, intron 2 of 5)	106858	NM_021255	57161	Hs.657926	NM_021255	ENSG00000139946	PELI2	-	pellino E3 ubiquitin protein ligase family member 2	protein-coding	1.28	3.88	4.15	28.82	11.71	70.85	16.45	2.54957
chr15	81605335	81605835	TTS (NM_004513)	TTS (NM_004513)	10939	NR_135013	80765	Hs.513075	NM_030574	ENSG00000172345	STARD5	-	StAR related lipid transfer domain containing 5	protein-coding	12.47	42.23	8.59	6.43	4.43	8.35	3.76	-2.66614
chr10	8477182	8477682	Intergenic	Intergenic	158922	NR_134492	105376398	Hs.63158	NR_134492		LOC105376398	-	uncharacterized LOC105376398	ncRNA	14.12	42.87	6.62	1.04	1.74	2.32	2.66	-4.23538
chr6	50817992	50818492	Intergenic	CpG	31803	NM_003221	7021	Hs.33102	NM_003221	ENSG00000008196	TFAP2B	AP-2B|AP2-B|PDA2	transcription factor AP-2 beta	protein-coding	18.89	51.13	12.84	2.7	1.11	2.63	3.6	-4.64294
chr12	48257217	48257717	intron (NM_001017536, intron 4 of 9)	intron (NM_001017536, intron 4 of 9)	41347	NM_001017536	7421	Hs.524368	NM_000376	ENSG00000111424	VDR	NR1I1|PPP1R163	vitamin D (1,25- dihydroxyvitamin D3) receptor	protein-coding	16.51	25.08	9.18	1.66	3.32	9.75	2.19	-3.30855
chr16	53075561	53076061	intron (NR_136518, intron 2 of 2)	intron (NR_136518, intron 2 of 2)	10974	NR_136518	105371267		NR_136518	ENSG00000277639	LOC105371267	PR-lncRNA-1	p53-regulated lncRNA 1	ncRNA	17.98	34.78	7.41	1.24	2.85	21.66	7.36	-2.37746
chr2	23350309	23350809	Intergenic	Intergenic	-257739	NM_052920	114818	Hs.130593	NM_025067	ENSG00000119771	KLHL29	KBTBD9	kelch like family member 29	protein-coding	2.38	1.94	2.96	66.56	31.49	51.05	22.87	3.22699
chr2	151377736	151378236	Intergenic	Intergenic	-33777	NM_001254738	390	Hs.6838	NM_005168	ENSG00000115963	RND3	ARHE|Rho8|RhoE|memB	Rho family GTPase 3	protein-coding	11.01	25.72	7.21	1.04	1.27	4.95	3.29	-3.45652
chr9	104116687	104117187	Intergenic	MLT1A0-int|LTR|ERVL-MaLR	28864	NM_001127610	570	Hs.284712	NM_001701	ENSG00000136881	BAAT	BACAT|BAT	bile acid-CoA:amino acid N-acyltransferase	protein-coding	2.75	4.04	1.78	36.91	22.47	32.95	21.15	2.66117
chr7	16649444	16649944	intron (NM_020319, intron 6 of 9)	intron (NM_020319, intron 6 of 9)	35748	NM_020319	57037	Hs.157378	NM_020319	ENSG00000106524	ANKMY2	ZMYND20	ankyrin repeat and MYND domain containing 2	protein-coding	0.92	1.13	1.78	17	18.99	13.61	17.39	3.03995
chr9	7433976	7434476	Intergenic	L1PA15-16|LINE|L1	365580	NM_001318058	90871	Hs.7517	NM_033428	ENSG00000137038	TMEM261	C9orf123	transmembrane protein 261	protein-coding	23.11	27.83	10.07	2.9	3.32	1.24	2.98	-3.77147
chr10	14592318	14592818	intron (NM_031453, intron 2 of 4)	intron (NM_031453, intron 2 of 4)	-1899	NM_001320739	83641	Hs.446315	NM_031453	ENSG00000065809	FAM107B	C10orf45|HITS	family with sequence similarity 107 member B	protein-coding	2.2	1.62	3.56	10.58	28.33	29.08	34.3	2.66705
chr5	9467772	9468272	intron (NM_003966, intron 1 of 22)	MIRc|SINE|MIR	-43423	NR_109935	101929338	Hs.675861	NR_109935	ENSG00000251370	SEMA5A-AS1	CTD-2201E9.1	SEMA5A antisense RNA 1	ncRNA	15.78	28.96	8.59	3.73	1.74	34.5	1.41	-2.78116
chr7	146705607	146706107	intron (NM_014141, intron 3 of 23)	MER34A1|LTR|ERV1	88844	NR_110829	101928700	Hs.571218	NR_110829	ENSG00000236795	LOC101928700	-	uncharacterized LOC101928700	ncRNA	0.55	0.97	0.59	13.06	12.03	1.7	20.83	3.89828
chr22	31644031	31644531	promoter-TSS (NM_001031801)	promoter-TSS (NM_001031801)	-67	NM_001031801	3985	Hs.474596	NM_005569	ENSG00000182541	LIMK2	-	LIM domain kinase 2	protein-coding	23.66	27.67	9.68	3.53	2.53	19.65	8.3	-2.62436
chr11	93344951	93345451	Intergenic	Intergenic	-49615	NM_033395	85459	Hs.458418	NM_033395	ENSG00000166004	CEP295	KIAA1731	centrosomal protein 295	protein-coding	1.28	1.13	3.36	20.94	23.26	14.54	32.89	2.73689
chr9	120253641	120254141	Intergenic	Intergenic	-76574	NM_014010	23245	Hs.601562	NM_014010	ENSG00000148219	ASTN2	bA67K19.1	astrotactin 2	protein-coding	2.02	2.27	2.37	37.74	10.29	35.27	19.42	2.47878
chr10	134588574	134589074	intron (NM_005539, intron 12 of 15)	intron (NM_005539, intron 12 of 15)	10713	NM_177400	84504	Hs.134013	NM_177400	ENSG00000148826	NKX6-2	GTX|NKX6.2|NKX6B	NK6 homeobox 2	protein-coding	4.59	9.06	2.17	69.46	14.72	64.5	70.64	2.54588
chr1	68097354	68097854	Intergenic	Intergenic	-53256	NM_001199741	1647	Hs.80409	NM_001924	ENSG00000116717	GADD45A	DDIT1|GADD45	growth arrest and DNA damage inducible alpha	protein-coding	2.57	4.53	1.68	41.68	26.59	107.97	36.97	3.54169
chr9	108081046	108081546	intron (NM_001330731, intron 3 of 15)	intron (NM_001330731, intron 3 of 15)	74402	NM_001286730	23446	Hs.573495	NM_022109	ENSG00000070214	SLC44A1	CD92|CDW92|CHTL1|CTL1	solute carrier family 44 member 1	protein-coding	1.65	2.1	1.78	38.78	26.75	52.9	23.5	3.36457
chr4	88330468	88330968	Intergenic	Intergenic	-13010	NM_001248011	53343	Hs.149500	NM_024047	ENSG00000170502	NUDT9	NUDT10	nudix hydrolase 9	protein-coding	1.1	1.46	1.88	23.85	9.97	15.78	31.8	2.5822
chr1	193228703	193229203	Intergenic	L2a|LINE|L2	-44922	NR_125789	101929184	Hs.146728	NR_125789	ENSG00000232077	LINC01031	TCONS_00000361	long intergenic non-protein coding RNA 1031	ncRNA	0.73	1.62	1.68	18.04	9.81	9.9	20.83	3.10183
chr11	23032303	23032803	Intergenic	Intergenic	-150581	NM_001195637	100500938	Hs.555029	NM_001195637	ENSG00000255359	CCDC179	-	coiled-coil domain containing 179	protein-coding	1.65	0.32	1.19	7.05	13.61	8.2	12.69	3.03022
chr12	90333216	90333716	Intergenic	Intergenic	-8004	NR_135019	105369891	Hs.148998	NR_135019	ENSG00000257725	LOC105369891	-	uncharacterized LOC105369891	ncRNA	2.02	0.81	0.99	10.58	20.57	14.85	12.84	2.98013
chr15	86106567	86107067	intron (NM_007200, intron 5 of 36)	intron (NM_007200, intron 5 of 36)	-56364	NM_001270546	11214	Hs.459211	NM_006738	ENSG00000170776	AKAP13	AKAP-13|AKAP-Lbc|ARHGEF13|BRX|HA-3|Ht31|LBC|PRKA13|PROTO-LB|PROTO-LBC|c-lbc|p47	A-kinase anchoring protein 13	protein-coding	1.28	0.32	0.49	14.93	7.75	5.41	8.61	3.14032
chr1	15528477	15528977	intron (NM_018022, intron 1 of 2)	intron (NM_018022, intron 1 of 2)	-30607	NM_001278502	727684	Hs.667584	NM_001278501		C1orf195	-	chromosome 1 open reading frame 195	protein-coding	2.75	2.1	2.77	24.05	25.32	65.59	37.75	3.11525
chr1	216878975	216879475	intron (NM_001243511, intron 2 of 7)	intron (NM_001243511, intron 2 of 7)	17589	NM_001243519	2104	Hs.444225	NM_001438	ENSG00000196482	ESRRG	ERR3|ERRgamma|NR3B3	estrogen related receptor gamma	protein-coding	6.97	16.5	5.63	1.66	1.9	6.19	2.19	-2.74737
chr12	47377193	47377693	Intergenic	L1PA8|LINE|L1	-95943	NM_001281429	91523	Hs.560100	NM_138371	ENSG00000179715	PCED1B	FAM113B	PC-esterase domain containing 1B	protein-coding	11.92	25.24	9.78	5.39	1.9	6.19	2.51	-3.81204
chr10	74398409	74398909	Intergenic	MSTB2|LTR|ERVL-MaLR	-12710	NM_001195518	10367	Hs.524367	NM_006077	ENSG00000107745	MICU1	CALC|CBARA1|EFHA3|MPXPS	mitochondrial calcium uptake 1	protein-coding	1.65	1.46	1.38	8.09	11.55	16.71	22.71	2.32211
chr9	27125001	27125501	intron (NM_001290078, intron 1 of 20)	intron (NM_001290078, intron 1 of 20)	16112	NM_000459	7010	Hs.89640	NM_000459	ENSG00000120156	TEK	CD202B|TIE-2|TIE2|VMCM|VMCM1	TEK receptor tyrosine kinase	protein-coding	13.39	34.78	7.31	3.94	4.11	3.71	5.8	-2.58868
chr15	56210101	56210601	intron (NM_001329212, intron 5 of 28)	intron (NM_001329212, intron 5 of 28)	-1022	NM_001284338	4734	Hs.1565	NM_006154	ENSG00000069869	NEDD4	NEDD4-1|RPF1	neural precursor cell expressed, developmentally down-regulated 4, E3 ubiquitin protein ligase	protein-coding	1.1	0.97	1.48	5.18	5.38	9.9	24.75	2.37274
chr8	81348035	81348535	Intergenic	L2c|LINE|L2	-49569	NM_001277145	65986	Hs.591868	NM_023929	ENSG00000205189	ZBTB10	RINZF	zinc finger and BTB domain containing 10	protein-coding	2.38	4.37	2.27	31.1	6.33	55.84	24.43	2.39769
chr16	19819514	19820014	intron (NR_130968, intron 7 of 8)	intron (NR_130968, intron 7 of 8)	76469	NM_016235	51704	Hs.148685	NM_016235	ENSG00000167191	GPRC5B	RAIG-2|RAIG2	G protein-coupled receptor class C group 5 member B	protein-coding	2.93	3.24	1.98	30.9	22	14.23	71.9	3.14873
chr1	81975213	81975713	Intergenic	Intergenic	47924	NR_125943	101927434	Hs.130394	NR_125943	ENSG00000234953	LOC101927434	-	uncharacterized LOC101927434	ncRNA	14.12	22.33	5.63	0.83	2.53	9.9	7.52	-2.46848
chr1	231369739	231370239	intron (NM_152379, intron 2 of 6)	intron (NM_152379, intron 2 of 6)	-6930	NM_014236	8443	Hs.498028	NM_014236	ENSG00000116906	GNPAT	DAP-AT|DAPAT|DHAPAT|RCDP2	glyceronephosphate O-acyltransferase	protein-coding	0.73	3.07	2.37	28.41	9.34	46.1	29.6	2.95653
chr2	127975424	127975924	Intergenic	Intergenic	-12331	NM_001001665	339761	Hs.407639	NM_001001665	ENSG00000186684	CYP27C1	-	cytochrome P450 family 27 subfamily C member 1	protein-coding	11.37	30.09	5.14	1.45	3.32	17.48	3.45	-2.49422
chr20	22471353	22471853	Intergenic	Intergenic	-70322	NR_027089	284788	Hs.651993	NR_027089	ENSG00000204684	LOC284788	-	uncharacterized LOC284788	ncRNA	2.02	6.8	3.16	34.21	36.88	61.26	34.46	2.97542
chr9	110904933	110905433	Intergenic	Intergenic	-653182	NM_004235	9314	Hs.376206	NM_004235	ENSG00000136826	KLF4	EZF|GKLF	Kruppel like factor 4	protein-coding	12.29	55.01	17.09	3.94	2.85	43	4.54	-2.47907
chr5	553946	554446	Intergenic	Intergenic	-18199	NR_039661	100616381		NR_039661	ENSG00000264233	MIR4456	-	microRNA 4456	ncRNA	3.85	2.75	2.86	64.7	12.5	97.14	15.98	2.89179
chr2	163444166	163444666	intron (NM_173162, intron 2 of 7)	intron (NM_173162, intron 2 of 7)	-181030	NR_110258	101929570	Hs.470445	NR_110258	ENSG00000237750	LOC101929570	-	uncharacterized LOC101929570	ncRNA	1.1	2.1	1.58	2.49	8.39	1.39	38.53	2.57326
chr3	118930043	118930543	TTS (NM_212543)	TTS (NM_212543)	-15040	NR_046574	100874201	Hs.721307	NR_046574	ENSG00000240254	B4GALT4-AS1	-	B4GALT4 antisense RNA 1	ncRNA	3.12	2.1	1.98	40.85	22.95	15	16.76	2.70437
chr3	108851939	108852439	Intergenic	Intergenic	-3372	NR_033977	401081	Hs.280892	NR_033977	ENSG00000241224	FLJ22763	-	uncharacterized LOC401081	ncRNA	0.18	0.97	1.58	20.74	28.33	16.86	26	3.95764
chr11	70071745	70072245	Intergenic	Intergenic	22726	NM_003824	8772	Hs.86131	NM_003824	ENSG00000168040	FADD	GIG3|MORT1	Fas associated via death domain	protein-coding	2.75	5.02	4.44	63.45	45.74	60.95	11.28	2.81364
chrX	122913672	122914172	Intergenic	L2a|LINE|L2	-47018	NM_001081550	57187	Hs.149991	NM_020449	ENSG00000125676	THOC2	CXorf3|MRX12|MRX35|THO2|dJ506G2.1|hTREX120	THO complex 2	protein-coding	1.1	1.29	0.59	10.16	12.03	25.37	21.46	3.22764
chr12	22741697	22742197	TTS (NR_135030)	TTS (NR_135030)	36033	NR_135031	105369691	Hs.556287	NR_135030		LOC105369691	-	uncharacterized LOC105369691	ncRNA	0.73	2.91	1.38	7.05	6.49	29.7	36.03	2.96746
chr2	47020773	47021273	Intergenic	MER72|LTR|ERV1	-22784	NR_034099	388948	Hs.728895	NR_034099	ENSG00000222005	LINC01118	-	long intergenic non-protein coding RNA 1118	ncRNA	0.55	0.49	2.27	6.64	5.54	18.56	15.82	2.6531
chr5	138060883	138061383	Intergenic	Intergenic	27865	NR_134245	105379194	Hs.445981	NR_134244	ENSG00000253404	LOC105379194	-	uncharacterized LOC105379194	ncRNA	22.2	87.53	9.58	13.06	4.75	25.68	7.52	-2.34995
chr1	168889644	168890144	intron (NR_104091, intron 3 of 4)	intron (NR_104091, intron 3 of 4)	133715	NR_024160	79100	Hs.250624	NR_024160	ENSG00000225826	LINC00626	-	long intergenic non-protein coding RNA 626	ncRNA	2.75	2.75	3.36	9.54	22.32	15.31	29.76	2.33768
chr7	95932431	95932931	intron (NR_027662, intron 1 of 16)	intron (NR_027662, intron 1 of 16)	18778	NM_014251	10165	Hs.489190	NM_014251	ENSG00000004864	SLC25A13	ARALAR2|CITRIN|CTLN2	solute carrier family 25 member 13	protein-coding	2.02	2.91	1.88	9.95	19.47	36.04	33.68	2.72002
chr20	49345484	49345984	Intergenic	Intergenic	-2347	NM_032521	84612	Hs.589848	NM_032521	ENSG00000124171	PARD6B	PAR6B	par-6 family cell polarity regulator beta	protein-coding	5.32	7.12	4.25	37.95	32.44	78.43	47.93	2.33041
chr2	102246628	102247128	Intergenic	Intergenic	-67287	NM_004834	9448	Hs.701013	NM_004834	ENSG00000071054	MAP4K4	FLH21957|HEL-S-31|HGK|MEKKK4|NIK	mitogen-activated protein kinase kinase kinase kinase 4	protein-coding	2.75	6.8	5.53	36.91	14.09	96.06	69.86	2.35239
chr4	45296385	45296885	Intergenic	MER58A|DNA|hAT-Charlie	-567984	NM_138335	132789	Hs.21398	NM_138335	ENSG00000163281	GNPDA2	GNP2|SB52	glucosamine-6-phosphate deaminase 2	protein-coding	0.55	0.81	1.98	5.81	6.96	0.31	44.95	2.76515
chr7	91671277	91671777	intron (NM_005751, intron 19 of 49)	intron (NM_005751, intron 19 of 49)	92313	NM_000786	1595	Hs.417077	NM_000786	ENSG00000001630	CYP51A1	CP51|CYP51|CYPL1|LDM|P450-14DM|P450L1	cytochrome P450 family 51 subfamily A member 1	protein-coding	3.12	0.32	1.28	63.24	15.35	32.33	39	3.65719
chr2	214505701	214506201	intron (NR_047660, intron 9 of 14)	L1PBa|LINE|L1	-116840	NR_039640	100616375		NR_039640	ENSG00000265734	MIR4438	-	microRNA 4438	ncRNA	27.7	57.27	9.48	11.82	4.27	9.9	6.58	-2.58824
chr6	82547639	82548139	Intergenic	Intergenic	-23980	NR_126363	101928770	Hs.586239	NR_126363	ENSG00000224995	LINC01526	Lnc-FAM46A-1	long intergenic non-protein coding RNA 1526	ncRNA	1.83	0.65	0.99	8.09	26.43	12.99	27.1	3.22141
chr9	116880409	116880909	Intergenic	Intergenic	-19322	NM_138424	113220	Hs.28149	NM_138424	ENSG00000136883	KIF12	-	kinesin family member 12	protein-coding	1.65	8.74	3.46	33.18	16.14	71.78	41.19	3.08838
chr7	6055328	6055828	intron (NM_006303, intron 2 of 3)	intron (NM_006303, intron 2 of 3)	5222	NM_001326611	7965	Hs.301613	NM_006303	ENSG00000106305	AIMP2	JTV-1|JTV1|P38	aminoacyl tRNA synthetase complex interacting multifunctional protein 2	protein-coding	11.01	27.5	3.85	1.24	1.58	15.31	4.54	-2.43357
chr20	48983012	48983512	Intergenic	Intergenic	-45383	NR_109950	101927586	Hs.637665	NR_109950	ENSG00000233077	LINC01271	-	long intergenic non-protein coding RNA 1271	ncRNA	1.28	0.81	1.19	12.23	14.4	40.53	14.88	3.12641
chr3	9939577	9940077	Intergenic	Intergenic	-4469	NM_153483	132014	Hs.390823	NM_144640	ENSG00000163701	IL17RE	-	interleukin 17 receptor E	protein-coding	6.42	4.85	3.65	54.95	28.33	43	83.64	2.52285
chr13	80221687	80222187	Intergenic	Intergenic	81075	NR_125772	103724388	Hs.434862	NR_125772	ENSG00000227676	LINC01068	-	long intergenic non-protein coding RNA 1068	ncRNA	16.69	21.52	4.54	1.24	3.01	4.8	1.1	-3.20378
chr22	41983686	41984186	intron (NM_002676, intron 1 of 7)	intron (NM_002676, intron 1 of 7)	1935	NM_002676	5372	Hs.75835	NM_002676	ENSG00000100417	PMM1	Sec53	phosphomannomutase 1	protein-coding	3.67	1.94	0.99	21.77	17.57	64.97	47.15	3.12896
chr8	29614210	29614710	intron (NR_125814, intron 1 of 3)	intron (NR_125814, intron 1 of 3)	8635	NR_125816	101929450	Hs.512440	NR_125814	ENSG00000253490	LINC02099	-	long intergenic non-protein coding RNA 2099	ncRNA	0.18	1.29	2.57	29.86	6.65	12.07	22.09	2.73294
chr7	89817554	89818054	intron (NR_110029, intron 2 of 2)	LTR38|LTR|ERV1	23145	NR_110029	100874100	Hs.573339	NR_110029	ENSG00000227646	STEAP2-AS1	-	STEAP2 antisense RNA 1	ncRNA	1.65	0.65	1.98	124.83	19.94	10.36	24.28	3.8565
chr21	43013813	43014313	Intergenic	Intergenic	-85399	NR_024367	54090	Hs.570442	NR_024367		LINC00111	C21orf21|NCRNA00111	long intergenic non-protein coding RNA 111	ncRNA	1.1	1.78	2.37	24.26	15.35	16.09	31.48	3.01923
chr15	86381835	86382335	Intergenic	Intergenic	13219	NR_049805	100847084		NR_049805	ENSG00000264406	MIR548AP	-	microRNA 548ap	ncRNA	4.22	6.63	3.26	54.53	13.61	4.33	59.68	2.32244
chr18	31392082	31392582	Intergenic	MSTB2|LTR|ERVL-MaLR	233791	NM_030632	80816	Hs.464876	NM_030632	ENSG00000141431	ASXL3	BRPS|KIAA1713	additional sex combs like 3, transcriptional regulator	protein-coding	12.47	21.19	6.81	0.62	1.58	7.27	2.98	-3.22831
chr2	22221299	22221799	Intergenic	Intergenic	-288025	NR_038837	645949	Hs.456782	NR_038837	ENSG00000229621	LINC01822	-	long intergenic non-protein coding RNA 1822	ncRNA	2.02	1.29	1.58	13.69	15.67	2.01	17.86	2.46984
chr15	83349011	83349511	exon (NM_004644, exon 8 of 26)	exon (NM_004644, exon 8 of 26)	29399	NM_001278512	8120	Hs.199593	NM_004644	ENSG00000103723	AP3B2	NAPTB	adaptor related protein complex 3 beta 2 subunit	protein-coding	14.31	33.17	7.41	3.53	4.91	5.41	4.07	-2.90304
chr11	69839188	69839688	Intergenic	Intergenic	70592	NR_120530	101928443	Hs.313468	NR_120529	ENSG00000248844	LOC101928443	-	uncharacterized LOC101928443	ncRNA	3.67	5.34	3.16	56.19	63.62	18.41	14.41	2.84549
chr2	217510011	217510511	intron (NM_000597, intron 2 of 4)	MIR|SINE|MIR	12134	NM_000597	3485	Hs.438102	NM_000597	ENSG00000115457	IGFBP2	IBP2|IGF-BP53	insulin like growth factor binding protein 2	protein-coding	1.83	3.4	2.57	46.66	8.23	6.03	57.64	2.88373
chr2	167814078	167814578	intron (NM_001079810, intron 2 of 9)	MamRep137|DNA|TcMar?	69331	NM_152381	129446	Hs.73680	NM_152381	ENSG00000163092	XIRP2	CMYA3	xin actin binding repeat containing 2	protein-coding	0.92	0.81	2.27	13.89	21.84	1.55	21.93	3.20423
chr2	108887344	108887844	Intergenic	LTR16A2|LTR|ERVL	-17501	NM_001056	6819	Hs.436123	NM_001056	ENSG00000198203	SULT1C2	ST1C1|ST1C2|SULT1C1|humSULTC2	sulfotransferase family 1C member 2	protein-coding	2.75	2.75	3.65	56.4	16.78	34.19	20.52	2.40254
chr11	43431931	43432431	intron (NM_018259, intron 15 of 23)	L1M5|LINE|L1	51746	NM_018259	55761	Hs.191186	NM_018259	ENSG00000052841	TTC17	-	tetratricopeptide repeat domain 17	protein-coding	0.55	0.97	2.17	11.61	11.08	12.38	6.42	2.35799
chr12	55285784	55286284	Intergenic	Intergenic	37735	NM_058173	118430	Hs.348419	NM_058173	ENSG00000172551	MUCL1	SBEM	mucin like 1	protein-coding	1.83	2.27	1.78	20.74	8.55	21.5	30.39	2.37713
chr10	9867282	9867782	Intergenic	MER61E|LTR|ERV1	-233153	NR_120636	101928298	Hs.385576	NR_120636	ENSG00000224788	LOC101928298	-	uncharacterized LOC101928298	ncRNA	3.3	1.62	2.67	30.07	47.16	14.54	76.12	3.59475
chr8	11561395	11561895	promoter-TSS (NM_002052)	promoter-TSS (NM_002052)	-15	NM_002052	2626	Hs.243987	NM_002052	ENSG00000136574	GATA4	ASD2|TACHD|TOF|VSD1	GATA binding protein 4	protein-coding	3.12	5.99	4.74	194.71	19.94	35.11	30.39	3.11716
chr5	75771734	75772234	intron (NM_006633, intron 2 of 35)	intron (NM_006633, intron 2 of 35)	-71250	NM_001285460	10788	Hs.291030	NM_006633	ENSG00000145703	IQGAP2	-	IQ motif containing GTPase activating protein 2	protein-coding	2.2	2.75	3.06	15.97	23.74	16.4	20.05	2.43536
chr21	40275691	40276191	intron (NR_120405, intron 2 of 3)	intron (NR_120405, intron 2 of 3)	34412	NR_120405	400867	Hs.689509	NR_120405		LOC400867	-	uncharacterized LOC400867	ncRNA	20.36	33.81	6.12	2.07	3.01	4.49	15.66	-2.67457
chr5	172064060	172064560	Intergenic	Intergenic	-3959	NM_001308178	54492	Hs.91521	NM_001142651	ENSG00000214357	NEURL1B	NEURL3|hNeur2|neur2	neuralized E3 ubiquitin protein ligase 1B	protein-coding	21.46	44.98	8.79	6.43	6.17	27.07	1.88	-2.42054
chr3	194167904	194168404	intron (NM_024524, intron 12 of 31)	intron (NM_024524, intron 12 of 31)	20814	NM_024524	79572	Hs.529609	NM_024524	ENSG00000133657	ATP13A3	AFURS1	ATPase 13A3	protein-coding	0.18	0.65	1.19	3.73	7.6	7.43	19.11	2.64658
chr11	66454103	66454603	intron (NM_006946, intron 35 of 36)	intron (NM_006946, intron 35 of 36)	-8961	NM_001286135	83759	Hs.618713	NM_031492	ENSG00000173914	RBM4B	RBM30|RBM4L|ZCCHC15|ZCCHC21B|ZCRB3B	RNA binding motif protein 4B	protein-coding	24.4	70.22	9.28	2.9	3.48	8.51	5.64	-3.70832
chr15	52018485	52018985	intron (NM_001143917, intron 1 of 2)	intron (NM_001143917, intron 1 of 2)	11585	NM_153374	256586	Hs.603629	NM_153374	ENSG00000140280	LYSMD2	-	LysM domain containing 2	protein-coding	15.59	29.12	7.01	2.49	3.17	7.27	3.13	-3.12186
chr8	29133504	29134004	Intergenic	Intergenic	-13144	NM_015254	23303	Hs.444767	NM_015254	ENSG00000197892	KIF13B	GAKIN	kinesin family member 13B	protein-coding	2.38	5.5	3.26	39.61	4.75	40.99	29.45	2.49064
chr9	36006500	36007000	Intergenic	L3|LINE|CR1	-30160	NM_001316345	8434	Hs.388918	NM_021111	ENSG00000122707	RECK	ST15	reversion inducing cysteine rich protein with kazal motifs	protein-coding	0.92	3.07	1.19	40.85	4.43	13.61	2.82	2.83115
chr6	167091881	167092381	intron (NM_001006932, intron 2 of 21)	intron (NM_001006932, intron 2 of 21)	-51366	NM_021135	6196	Hs.655277	NM_021135	ENSG00000071242	RPS6KA2	HU-2|MAPKAPK1C|RSK|RSK3|S6K-alpha|S6K-alpha2|p90-RSK3|p90RSK2|pp90RSK3	ribosomal protein S6 kinase A2	protein-coding	1.47	0.97	2.37	14.31	9.97	19.03	21.15	2.54112
chr3	148318786	148319286	Intergenic	ERVL-E-int|LTR|ERVL	-96622	NM_009585	185	Hs.477887	NM_000685	ENSG00000144891	AGTR1	AG2S|AGTR1B|AT1|AT1AR|AT1B|AT1BR|AT1R|AT2R1|HAT1R	angiotensin II receptor type 1	protein-coding	1.65	2.1	2.86	10.58	17.73	21.97	11.9	2.33555
chr7	1017388	1017888	Intergenic	Intergenic	-2403	NM_001031617	90639	Hs.121593	NM_001031617	ENSG00000240230	COX19	-	COX19, cytochrome c oxidase assembly factor	protein-coding	4.77	4.85	2.37	43.13	11.87	124.68	30.23	2.35591
chr7	91639457	91639957	intron (NM_005751, intron 8 of 49)	LTR22C|LTR|ERVK	69518	NM_005751	10142	Hs.651221	NM_005751	ENSG00000127914	AKAP9	AKAP-9|AKAP350|AKAP450|CG-NAP|HYPERION|LQT11|MU-RMS-40.16A|PPP1R45|PRKA9|YOTIAO	A-kinase anchoring protein 9	protein-coding	1.1	1.46	1.88	27.37	17.88	1.24	2.51	2.51259
chr12	97092712	97093212	intron (NM_001306084, intron 45 of 67)	MER51A|LTR|ERV1	-208039	NM_001135177	121441	Hs.270084	NM_152905	ENSG00000139350	NEDD1	GCP-WD|TUBGCP7	neural precursor cell expressed, developmentally down-regulated 1	protein-coding	1.1	1.29	1.98	64.49	10.6	43	22.71	4.57017
chr1	180126813	180127313	intron (NM_001004128, intron 1 of 12)	intron (NM_001004128, intron 1 of 12)	3095	NM_001004128	5768	Hs.744925	NM_002826	ENSG00000116260	QSOX1	Q6|QSCN6	quiescin sulfhydryl oxidase 1	protein-coding	1.47	2.1	4.05	44.37	18.99	43.78	58.11	3.0922
chr11	77748061	77748561	intron (NM_001203261, intron 2 of 2)	intron (NM_001203261, intron 2 of 2)	8926	NM_001282406	65987	Hs.709780	NM_023930	ENSG00000151364	KCTD14	-	potassium channel tetramerization domain containing 14	protein-coding	4.59	5.5	4.74	38.98	14.4	31.87	69.55	2.45606
chr1	223673849	223674349	Intergenic	Intergenic	107384	NM_152610	164127	Hs.192090	NM_152610	ENSG00000178395	CCDC185	C1orf65	coiled-coil domain containing 185	protein-coding	13.39	43.04	7.8	2.7	2.22	13.61	10.02	-2.68395
chr4	77584844	77585344	intron (NM_020859, intron 2 of 10)	Charlie8|DNA|hAT-Charlie	88390	NR_039655	100616254		NR_039655	ENSG00000283682	MIR548AH	-	microRNA 548ah	ncRNA	2.75	0.65	2.47	10.37	9.18	3.56	23.34	2.41344
chr19	42408514	42409014	intron (NM_004706, intron 22 of 28)	intron (NM_004706, intron 22 of 28)	20318	NM_199002	9138	Hs.631550	NM_004706	ENSG00000076928	ARHGEF1	GEF1|LBCL2|LSC|P115-RHOGEF|SUB1.5	Rho guanine nucleotide exchange factor 1	protein-coding	3.85	10.68	5.04	50.39	20.26	112.15	67.67	2.61796
chr6	10163366	10163866	Intergenic	Intergenic	-248935	NR_033910	100130275	Hs.661431	NR_033910		TFAP2A-AS1	-	TFAP2A antisense RNA 1	ncRNA	12.29	27.99	6.32	5.81	2.69	6.03	4.7	-2.75529
chr22	40783676	40784176	intron (NM_015705, intron 1 of 21)	intron (NM_015705, intron 1 of 21)	17360	NM_001301849	27352	Hs.474914	NM_015705	ENSG00000100359	SGSM3	CIP85|MAP|RABGAP5|RUSC3|RUTBC3|RabGAP-5|rabGAPLP	small G protein signaling modulator 3	protein-coding	2.75	5.5	2.27	18.25	14.09	67.13	40.1	2.34865
chr2	208684670	208685170	Intergenic	Intergenic	-50777	NM_003468	7855	Hs.17631	NM_003468	ENSG00000163251	FZD5	C2orf31|HFZ5	frizzled class receptor 5	protein-coding	4.95	5.02	4.64	27.99	38.3	74.71	62.34	2.71228
chr20	49294688	49295188	intron (NM_001290268, intron 1 of 21)	intron (NM_001290268, intron 1 of 21)	13129	NR_110890	140876	Hs.372578	NM_080829	ENSG00000042062	FAM65C	C20orf175|C20orf176	family with sequence similarity 65 member C	protein-coding	4.77	3.88	2.86	57.02	15.51	47.49	51.38	2.35022
chr12	20183709	20184209	intron (NR_040098, intron 2 of 2)	intron (NR_040098, intron 2 of 2)	16340	NR_040098	100506393	Hs.658356	NR_040098	ENSG00000256287	LOC100506393	-	uncharacterized LOC100506393	ncRNA	1.28	1.29	0.79	10.78	4.11	6.5	23.18	2.62163
chr7	73207871	73208371	Intergenic	Intergenic	-23521	NM_001306	1365	Hs.647023	NM_001306	ENSG00000165215	CLDN3	C7orf1|CPE-R2|CPETR2|HRVP1|RVP1	claudin 3	protein-coding	2.93	5.18	3.56	55.78	16.46	20.73	44.01	2.64151
chr8	29957150	29957650	intron (NM_001128208, intron 1 of 3)	L2b|LINE|L2	4478	NM_015344	23484	Hs.146585	NM_015344	ENSG00000104660	LEPROTL1	HSPC112|Vps55|my047	leptin receptor overlapping transcript-like 1	protein-coding	1.65	1.94	2.17	22.81	7.28	12.22	17.7	2.49907
chr15	39566051	39566551	Intergenic	Intergenic	23431	NM_001302797	400360	Hs.376109	NM_207445		C15orf54	-	chromosome 15 open reading frame 54	ncRNA	2.02	2.1	1.88	34.42	19.15	14.39	49.5	3.23436
chr12	115821430	115821930	Intergenic	Intergenic	-699711	NM_005996	6926	Hs.744016	NM_005996	ENSG00000135111	TBX3	TBX3-ISO|UMS|XHL	T-box 3	protein-coding	13.39	43.36	5.23	0.62	2.37	9.75	3.76	-3.11153
chr7	52615160	52615660	Intergenic	LTR22A|LTR|ERVK	-487939	NM_182595	285877	Hs.381970	NM_182595	ENSG00000221900	POM121L12	-	POM121 transmembrane nucleoporin like 12	protein-coding	1.1	2.59	2.67	26.75	4.27	35.42	6.89	2.46557
chr5	29191461	29191961	Intergenic	L1PA2|LINE|L1	48101	NR_130777	101929660	Hs.171348	NR_130777		LINC02109	-	long intergenic non-protein coding RNA 2109	ncRNA	1.47	0.65	1.88	31.31	6.96	11.6	0.94	2.48062
chr10	61731591	61732091	Intergenic	L2a|LINE|L2	-11170	NR_024340	283025	Hs.522955	NM_001017982	ENSG00000235931	LINC01553	C10orf40	long intergenic non-protein coding RNA 1553	ncRNA	2.2	2.27	2.27	14.51	17.41	18.1	22.56	2.33889
chr1	165615078	165615578	intron (NM_004528, intron 1 of 5)	intron (NM_004528, intron 1 of 5)	15218	NM_004528	4259	Hs.191734	NM_004528	ENSG00000143198	MGST3	GST-III	microsomal glutathione S-transferase 3	protein-coding	2.2	4.04	2.17	123.79	30.39	72.7	60.3	3.41087
chr6	75244149	75244649	intron (NR_110856, intron 2 of 3)	intron (NR_110856, intron 2 of 3)	465232	NR_110856	101928516	Hs.384600	NR_110856	ENSG00000223786	LOC101928516	-	uncharacterized LOC101928516	ncRNA	1.1	0	1.98	20.32	19.62	19.49	37.59	3.16263
chrX	108524626	108525126	Intergenic	Intergenic	200409	NM_001522	2986	Hs.123074	NM_001522	ENSG00000101890	GUCY2F	CYGF|GC-F|GUC2DL|GUC2F|RETGC-2|ROS-GC2	guanylate cyclase 2F, retinal	protein-coding	0.92	2.43	2.67	13.89	23.58	17.79	33.21	2.75791
chr7	543145	543645	intron (NM_002607, intron 4 of 6)	intron (NM_002607, intron 4 of 6)	16086	NM_002607	5154	Hs.535898	NM_002607	ENSG00000197461	PDGFA	PDGF-A|PDGF1	platelet derived growth factor subunit A	protein-coding	4.4	10.84	2.96	54.53	20.26	127.15	83.33	2.65071
chr16	14097077	14097577	Intergenic	Intergenic	12548	NR_110909	101927311		NR_110909	ENSG00000262097	LOC101927311	-	uncharacterized LOC101927311	ncRNA	15.23	35.11	9.88	3.32	1.9	22.12	4.54	-2.53977
chr9	21853422	21853922	intron (NM_002451, intron 5 of 7)	intron (NM_002451, intron 5 of 7)	51037	NM_002451	4507	Hs.193268	NM_002451	ENSG00000099810	MTAP	BDMF|DMSFH|DMSMFH|HEL-249|LGMBF|MSAP|c86fus	methylthioadenosine phosphorylase	protein-coding	1.28	1.62	1.58	7.26	16.78	6.81	17.86	2.64214
chr7	52214906	52215406	Intergenic	Intergenic	-830598	NM_001287436	23242	Hs.99141	NM_015198	ENSG00000106078	COBL	-	cordon-bleu WH2 repeat protein	protein-coding	1.65	0.97	1.68	23.22	14.56	4.18	20.21	2.72741
chr6	49635908	49636408	Intergenic	Intergenic	-31571	NM_000324	6005	Hs.120950	NM_000324	ENSG00000112077	RHAG	CD241|OHS|OHST|RH2|RH50A|Rh50|Rh50GP|SLC42A1	Rh-associated glycoprotein	protein-coding	1.83	1.29	1.48	8.29	6.81	5.72	18.48	2.45333
chr20	48410149	48410649	Intergenic	L1ME3C|LINE|L1	-18851	NR_048538	23315	Hs.444202	NM_015266	ENSG00000197818	SLC9A8	NHE-8|NHE8	solute carrier family 9 member A8	protein-coding	2.75	1.62	3.16	23.43	21.68	82.91	18.8	2.88449
chr8	29087711	29088211	intron (NM_015254, intron 2 of 39)	intron (NM_015254, intron 2 of 39)	32649	NM_015254	23303	Hs.444767	NM_015254	ENSG00000197892	KIF13B	GAKIN	kinesin family member 13B	protein-coding	3.85	6.15	2.67	115.71	9.02	23.98	21.93	2.72505
chr1	153859989	153860489	intron (NM_020699, intron 1 of 10)	intron (NM_020699, intron 1 of 10)	35212	NM_020699	57459	Hs.4779	NM_020699	ENSG00000143614	GATAD2B	MRD18|P66beta|p68	GATA zinc finger domain containing 2B	protein-coding	2.02	0.81	0.79	8.71	4.11	15	18.17	2.35713
chr7	55146701	55147201	intron (NM_001346941, intron 1 of 21)	intron (NM_001346941, intron 1 of 21)	-30559	NM_001346900	1956	Hs.488293	NM_005228	ENSG00000146648	EGFR	ERBB|ERBB1|HER1|NISBD2|PIG61|mENA	epidermal growth factor receptor	protein-coding	17.79	10.68	5.93	29.03	541.42	40.53	28.35	3.69102
chr5	6660268	6660768	intron (NR_136739, intron 4 of 5)	intron (NR_136739, intron 4 of 5)	-27045	NR_037947	54888	Hs.481526	NM_017755	ENSG00000037474	NSUN2	MISU|MRT5|SAKI|TRM4	NOP2/Sun RNA methyltransferase family member 2	protein-coding	2.2	4.69	4.54	82.32	13.14	90.8	6.42	2.75994
chr12	11760531	11761031	Intergenic	MER102b|DNA|hAT-Charlie	-42007	NM_001987	2120	Hs.504765	NM_001987	ENSG00000139083	ETV6	TEL|TEL/ABL|THC5	ETS variant 6	protein-coding	0.92	0	1.68	13.06	5.54	30.01	7.36	3.03174
chr6	78544306	78544806	intron (NM_001282136, intron 4 of 4)	LTR22B|LTR|ERVK	181785	NM_001322247	101928601	Hs.544538	NM_001282136	ENSG00000269964	MEI4	-	meiotic double-stranded break formation protein 4	protein-coding	2.38	2.1	1.38	35.46	12.98	21.04	31.95	3.0228
chr11	75034567	75035067	intron (NM_020251, intron 1 of 14)	intron (NM_020251, intron 1 of 14)	11413	NR_029891	442900		NR_029891	ENSG00000199090	MIR326	MIRN326|hsa-mir-326|mir-326	microRNA 326	ncRNA	1.83	1.94	2.57	44.79	14.72	43.93	26.31	3.06858
chr8	86462394	86462894	Intergenic	L1MB1|LINE|L1	-85500	NR_121630	100996348	Hs.606624	NR_121630	ENSG00000253549	CA3-AS1	-	CA3 antisense RNA 1	ncRNA	2.02	1.29	1.68	16.8	19.15	4.64	19.58	2.86213
chr4	69598737	69599237	Intergenic	MER61F|LTR|ERV1	-62493	NM_001076	7366	Hs.150207	NM_001076	ENSG00000196620	UGT2B15	HLUG4|UDPGT 2B8|UDPGT2B15|UDPGTH3|UGT2B8	UDP glucuronosyltransferase family 2 member B15	protein-coding	2.75	1.29	2.47	30.48	24.69	31.71	24.59	3.11656
chr7	77111059	77111559	Intergenic	Intergenic	-55464	NM_002835	5782	Hs.61812	NM_002835	ENSG00000127947	PTPN12	PTP-PEST|PTPG1	protein tyrosine phosphatase, non-receptor type 12	protein-coding	4.59	8.74	2.47	115.5	12.66	31.56	40.57	2.59946
chr8	37371715	37372215	Intergenic	Intergenic	6939	NR_121621	100507420	Hs.105962	NR_121620		LINC01605	-	long intergenic non-protein coding RNA 1605	ncRNA	9.72	28.64	7.41	2.28	2.22	16.71	4.07	-2.61668
chr6	86099763	86100263	promoter-TSS (NR_134634)	promoter-TSS (NR_134634)	-109	NR_134634	101928820	Hs.587370	NR_134633	ENSG00000234155	LOC101928820	-	uncharacterized LOC101928820	ncRNA	1.28	2.1	2.37	35.46	17.73	33.26	6.74	2.67147
chr5	116099669	116100169	Intergenic	Intergenic	-2014	NR_104678	102467223	Hs.570916	NR_104678		LOC102467223	-	uncharacterized LOC102467223	ncRNA	16.33	31.23	7.7	1.87	2.37	2.01	2.66	-3.67035
chr8	53252714	53253214	intron (NM_014682, intron 2 of 25)	intron (NM_014682, intron 2 of 25)	69475	NM_014682	9705	Hs.655499	NM_014682	ENSG00000147488	ST18	NZF3|ZC2H2C3|ZC2HC10|ZNF387	ST18, C2H2C-type zinc finger	protein-coding	1.47	3.88	3.06	19.91	18.83	32.33	36.65	2.44119
chr11	75445816	75446316	Intergenic	Intergenic	17202	NM_025098	80168	Hs.288568	NM_025098	ENSG00000166391	MOGAT2	DGAT2L5|DGAT2L5.|MGAT2|hDC5	monoacylglycerol O-acyltransferase 2	protein-coding	3.3	3.07	3.16	55.36	9.97	74.56	18.64	2.38595
chr20	50320231	50320731	intron (NM_006045, intron 4 of 27)	intron (NM_006045, intron 4 of 27)	64469	NM_006045	10079	Hs.649234	NM_006045	ENSG00000054793	ATP9A	ATPIIA	ATPase phospholipid transporting 9A (putative)	protein-coding	2.2	0.81	0.99	7.88	14.88	41.3	19.42	3.0479
chr8	128582538	128583038	Intergenic	Intergenic	-88404	NR_024393	727677	Hs.673248	NR_024393	ENSG00000246228	CASC8	CARLo-1|LINC00860	cancer susceptibility candidate 8 (non-protein coding)	ncRNA	2.93	3.72	2.57	20.53	18.04	68.68	37.44	2.75418
chr1	100045927	100046427	Intergenic	Intergenic	-65254	NM_017734	54873	Hs.483993	NM_017734	ENSG00000099260	PALMD	C1orf11|PALML	palmdelphin	protein-coding	23.11	49.67	10.77	0.83	1.42	2.01	3.92	-4.26265
chr14	51849132	51849632	Intergenic	Intergenic	49271	NR_038358	283553	Hs.325752	NR_038358	ENSG00000258479	LINC00640	-	long intergenic non-protein coding RNA 640	ncRNA	17.61	26.7	5.33	1.66	0.63	2.78	0.31	-4.90118
chr3	71257675	71258175	intron (NM_001012505, intron 5 of 6)	intron (NM_001012505, intron 5 of 6)	36391	NM_001244814	27086	Hs.59368	NM_032682	ENSG00000114861	FOXP1	12CC4|HSPC215|MFH|QRF1|hFKH1B	forkhead box P1	protein-coding	0.73	3.07	1.48	12.86	7.75	19.8	25.84	2.3728
chr2	151071075	151071575	Intergenic	UCON27|Unknown|Unknown	272884	NM_005168	390	Hs.6838	NM_005168	ENSG00000115963	RND3	ARHE|Rho8|RhoE|memB	Rho family GTPase 3	protein-coding	0.73	0.81	2.07	15.14	19.15	21.19	10.81	2.83938
chr3	102804328	102804828	Intergenic	MIR|SINE|MIR	438382	NR_039611	100616336		NR_039611	ENSG00000265328	MIR548AB	-	microRNA 548ab	ncRNA	1.1	0.81	2.07	5.81	22.79	10.98	2.35	2.38031
chr2	131565098	131565598	Intergenic	Intergenic	51484	NM_001105195	205147	Hs.369289	NM_152698	ENSG00000178171	AMER3	FAM123C	APC membrane recruitment protein 3	protein-coding	27.7	61.96	10.47	9.33	3.48	14.23	5.33	-3.14873
chr9	47196523	47197023	Intergenic	Intergenic	353104	NR_126050	103908605	Hs.721139	NR_126050		LOC103908605	-	uncharacterized LOC103908605	ncRNA	0.73	0.65	0.99	9.54	8.23	15	6.27	3.1956
chr4	129482148	129482648	Intergenic	Intergenic	133227	NR_125882	100507487	Hs.549644	NR_125882	ENSG00000251432	LOC100507487	-	uncharacterized LOC100507487	ncRNA	1.1	2.27	2.07	45.41	16.46	19.65	9.24	2.84532
chr14	100525645	100526145	intron (NM_001330221, intron 1 of 13)	intron (NM_001330221, intron 1 of 13)	-5856	NM_016337	51466	Hs.125867	NM_016337	ENSG00000196405	EVL	RNB6	Enah/Vasp-like	protein-coding	9.54	23.94	3.36	1.04	2.22	6.19	3.29	-2.70971
chr11	128318372	128318872	Intergenic	Intergenic	73583	NM_005238	2113	Hs.369438	NM_005238	ENSG00000134954	ETS1	ETS-1|EWSR2|c-ets-1|p54	ETS proto-oncogene 1, transcription factor	protein-coding	5.5	4.37	3.85	40.64	38.14	78.12	96.96	2.89271
chr9	92788033	92788533	non-coding (NR_038882, exon 3 of 4)	non-coding (NR_038882, exon 3 of 4)	-2466	NR_036253	100422963		NR_036253	ENSG00000263967	MIR4290	-	microRNA 4290	ncRNA	6.6	27.83	8.1	1.87	1.74	6.19	2.19	-3.58674
chr7	63360652	63361152	Intergenic	Intergenic	129578	NR_039987	100506050	Hs.405628	NR_039987		LINC01005	-	long intergenic non-protein coding RNA 1005	ncRNA	22.38	56.3	8.69	7.88	6.17	18.87	6.42	-2.49835
chr1	8064734	8065234	Intergenic	Intergenic	21409	NM_018948	54206	Hs.605445	NM_018948	ENSG00000116285	ERRFI1	GENE-33|MIG-6|MIG6|RALT	ERBB receptor feedback inhibitor 1	protein-coding	18.89	70.86	8.59	4.35	6.33	39.6	7.36	-2.40898
chr2	169073098	169073598	intron (NM_013233, intron 1 of 17)	intron (NM_013233, intron 1 of 17)	30757	NM_013233	27347	Hs.276271	NM_013233	ENSG00000198648	STK39	DCHT|PASK|SPAK	serine/threonine kinase 39	protein-coding	3.67	7.6	2.27	24.26	21.84	56	50.75	2.40444
chr2	169053333	169053833	intron (NM_013233, intron 1 of 17)	L2a|LINE|L2	50522	NM_013233	27347	Hs.276271	NM_013233	ENSG00000198648	STK39	DCHT|PASK|SPAK	serine/threonine kinase 39	protein-coding	2.75	2.75	2.27	31.73	21.05	41.92	45.11	3.18974
chr3	124691281	124691781	intron (NM_020733, intron 16 of 16)	intron (NM_020733, intron 16 of 16)	-37936	NM_033049	56667	Hs.5940	NM_033049	ENSG00000173702	MUC13	DRCC1|MUC-13	mucin 13, cell surface associated	protein-coding	1.1	0.81	1.98	18.87	12.5	22.74	15.04	2.64866
chr1	184448476	184448976	intron (NM_030806, intron 2 of 5)	intron (NM_030806, intron 2 of 5)	92576	NM_030806	81563	Hs.497159	NM_030806	ENSG00000116667	C1orf21	PIG13	chromosome 1 open reading frame 21	protein-coding	2.75	1.13	0.99	15.34	8.07	19.8	10.96	2.40256
chr10	133473484	133473984	Intergenic	Intergenic	148801	NR_038365	399827	Hs.523353	NM_001001677	ENSG00000189275	LINC01164	-	long intergenic non-protein coding RNA 1164	ncRNA	1.83	2.43	1.38	25.92	6.81	36.66	59.36	3.05578
chr11	75041202	75041702	intron (NM_020251, intron 1 of 14)	intron (NM_020251, intron 1 of 14)	4778	NR_029891	442900		NR_029891	ENSG00000199090	MIR326	MIRN326|hsa-mir-326|mir-326	microRNA 326	ncRNA	1.83	5.02	2.96	44.37	10.13	36.66	38.38	2.66836
chr1	182057106	182057606	Intergenic	Intergenic	-26509	NM_001009992	127665	Hs.684328	NM_001009992	ENSG00000179930	ZNF648	-	zinc finger protein 648	protein-coding	23.85	68.44	11.95	3.94	2.22	9.9	7.52	-3.5434
chr4	110910188	110910688	intron (NM_001178130, intron 18 of 22)	intron (NM_001178130, intron 18 of 22)	76398	NM_001178130	1950	Hs.419815	NM_001963	ENSG00000138798	EGF	HOMG4|URG	epidermal growth factor	protein-coding	12.29	40.61	6.72	10.37	1.58	8.97	1.88	-2.61969
chr11	12452383	12452883	intron (NM_018222, intron 1 of 12)	intron (NM_018222, intron 1 of 12)	53607	NM_018222	55742	Hs.432914	NM_018222	ENSG00000197702	PARVA	CH-ILKBP|MXRA2	parvin alpha	protein-coding	12.29	18.77	5.93	3.11	2.85	9.59	4.07	-2.35012
chr5	35237850	35238350	Intergenic	MIRc|SINE|MIR	-7409	NM_000949	5618	Hs.368587	NM_000949	ENSG00000113494	PRLR	HPRL|MFAB|hPRLrI	prolactin receptor	protein-coding	2.02	2.1	2.67	54.74	8.07	27.07	6.74	2.33893
chr3	182962860	182963360	intron (NM_015078, intron 15 of 29)	intron (NM_015078, intron 15 of 29)	-7922	NM_032047	84002	Hs.718506	NM_032047	ENSG00000176597	B3GNT5	B3GN-T5|beta3Gn-T5	UDP-GlcNAc:betaGal beta-1,3-N-acetylglucosaminyltransferase 5	protein-coding	3.3	2.43	2.57	35.67	14.4	53.52	7.36	2.83755
chrX	49918996	49919496	Intergenic	LTR8A|LTR|ERV1	45758	NM_139289	8852	Hs.97633	NM_003886	ENSG00000147081	AKAP4	AKAP 82|AKAP-4|AKAP82|CT99|FSC1|HI|PRKA4|hAKAP82|p82	A-kinase anchoring protein 4	protein-coding	0.92	1.13	0.89	15.14	7.28	21.66	6.27	2.84655
chr15	95067717	95068217	Intergenic	LTR8A|LTR|ERV1	168803	NM_001159644	55784	Hs.33368	NM_018349	ENSG00000140563	MCTP2	-	multiple C2 and transmembrane domain containing 2	protein-coding	2.02	2.27	1.78	37.74	9.5	13.46	15.98	2.62742
chr9	36867977	36868477	intron (NM_001280549, intron 6 of 7)	intron (NM_001280549, intron 6 of 7)	-3922	NR_039766	100616278		NR_039766	ENSG00000264922	MIR4540	-	microRNA 4540	ncRNA	2.02	7.93	3.26	52.25	24.21	29.85	40.26	2.57253
chr4	56475655	56476155	intron (NM_001292045, intron 2 of 8)	intron (NM_001292045, intron 2 of 8)	-17526	NM_152401	132954	Hs.223712	NM_152401	ENSG00000163440	PDCL2	GCPHLP	phosducin like 2	protein-coding	19.08	39.64	5.73	1.45	1.27	5.1	6.89	-3.46247
chr4	102571141	102571641	Intergenic	Intergenic	-140373	NM_017935	55024	Hs.480400	NM_017935	ENSG00000153064	BANK1	BANK	B-cell scaffold protein with ankyrin repeats 1	protein-coding	13.39	23.14	9.38	0.41	2.85	2.17	0.94	-3.6933
chr19	3520727	3521227	intron (NM_016263, intron 1 of 13)	L1MB5|LINE|L1	-1977	NM_001136198	51343	Hs.413133	NM_016263	ENSG00000105325	FZR1	CDC20C|CDH1|FZR|FZR2|HCDH|HCDH1	fizzy/cell division cycle 20 related 1	protein-coding	25.68	37.37	6.91	1.87	4.27	20.57	13.16	-2.42531
chr15	93160722	93161222	3' UTR (NM_207446, exon 3 of 3)	3' UTR (NM_207446, exon 3 of 3)	38059	NM_207446	400451	Hs.27373	NM_207446	ENSG00000185442	FAM174B	-	family with sequence similarity 174 member B	protein-coding	3.49	4.85	4.74	48.94	22.16	48.42	65.47	2.52568
chr10	59657971	59658471	Intergenic	LTR9|LTR|ERV1	369473	NM_152230	253430	Hs.30280	NM_152230	ENSG00000151151	IPMK	-	inositol polyphosphate multikinase	protein-coding	3.12	4.21	3.06	25.5	34.5	28.46	26.31	2.45926
chr18	848195	848695	Intergenic	Intergenic	-36118	NM_005433	7525	Hs.194148	NM_005433	ENSG00000176105	YES1	HsT441|P61-YES|Yes|c-yes	YES proto-oncogene 1, Src family tyrosine kinase	protein-coding	2.93	3.72	3.06	45.41	26.43	32.79	27.41	2.66141
chr20	52765569	52766069	Intergenic	Intergenic	24697	NM_000782	1591	Hs.89663	NM_000782	ENSG00000019186	CYP24A1	CP24|CYP24|HCAI|HCINF1|P450-CC24	cytochrome P450 family 24 subfamily A member 1	protein-coding	6.42	3.88	1.88	24.88	4.43	273.8	9.24	2.49923
chr6	107596452	107596952	intron (NM_020381, intron 2 of 7)	MLT1H2|LTR|ERVL-MaLR	-161066	NM_001080450	57673	Hs.418045	NM_001080450	ENSG00000178409	BEND3	KIAA1553	BEN domain containing 3	protein-coding	2.2	1.62	0.99	21.57	7.6	8.51	28.35	2.58653
chrX	103966496	103966996	intron (NM_017416, intron 2 of 10)	intron (NM_017416, intron 2 of 10)	155750	NM_017416	26280	Hs.675519	NM_017416	ENSG00000189108	IL1RAPL2	IL-1R9|IL1R9|IL1RAPL-2|TIGIRR-1	interleukin 1 receptor accessory protein like 2	protein-coding	0.37	0	0.99	17.83	16.93	15	21.3	4.35191
chr12	98967918	98968418	Intergenic	Intergenic	-19235	NM_002635	5250	Hs.290404	NM_002635	ENSG00000075415	SLC25A3	OK/SW-cl.48|PHC|PTP	solute carrier family 25 member 3	protein-coding	2.02	0.97	1.38	21.98	24.06	20.26	18.01	3.11684
chr16	47769054	47769554	Intergenic	Intergenic	-123188	NR_110650	101927132	Hs.589404	NR_110650	ENSG00000261231	LINC02133	-	long intergenic non-protein coding RNA 2133	ncRNA	1.83	1.13	2.67	14.1	10.13	19.49	52.94	2.82621
chr1	206292340	206292840	Intergenic	Intergenic	-3943	NM_001007544	440712	Hs.662248	NM_001007544	ENSG00000263961	C1orf186	RHEX	chromosome 1 open reading frame 186	protein-coding	1.47	2.59	3.16	13.27	12.03	30.94	23.03	2.38144
chr2	138829756	138830256	Intergenic	Intergenic	-29448	NR_135526	105373635		NR_135526	ENSG00000224231	LINC01832	-	long intergenic non-protein coding RNA 1832	ncRNA	24.95	60.35	9.98	1.45	3.48	2.78	2.35	-4.30057
chr8	65669345	65669845	intron (NM_004820, intron 1 of 5)	intron (NM_004820, intron 1 of 5)	41753	NM_004820	9420	Hs.657330	NM_004820	ENSG00000172817	CYP7B1	CBAS3|CP7B|SPG5A	cytochrome P450 family 7 subfamily B member 1	protein-coding	15.96	32.52	8.2	4.98	2.69	4.02	2.98	-3.27692
chr12	104802315	104802815	Intergenic	MIRc|SINE|MIR	-48127	NM_001173982	50515	Hs.17569	NM_018413	ENSG00000171310	CHST11	C4ST|C4ST-1|C4ST1|HSA269537	carbohydrate sulfotransferase 11	protein-coding	1.83	3.24	1.38	41.06	7.75	34.96	17.07	2.51936
chr3	12800628	12801128	promoter-TSS (NM_001284407)	promoter-TSS (NM_001284407)	-70	NM_018306	55287	Hs.475502	NM_018306	ENSG00000088726	TMEM40	-	transmembrane protein 40	protein-coding	21.46	46.43	8.89	4.35	2.69	26.45	3.13	-2.61191
chr3	157291754	157292254	intron (NM_001130002, intron 4 of 4)	intron (NM_001130002, intron 4 of 4)	30871	NM_001130002	152078	Hs.259046	NM_001099777	ENSG00000174899	PQLC2L	C3orf55	PQ loop repeat containing 2 like	protein-coding	1.1	1.78	1.58	18.04	22	6.65	13.63	2.70974
chr7	123438063	123438563	Intergenic	Intergenic	-7548	NR_125730	103625684		NR_125730	ENSG00000207357	RNU6-2	U6-2	RNA, U6 small nuclear 2	snRNA	2.57	6.63	1.88	29.44	21.21	13.77	51.38	2.55915
chr3	72386048	72386548	Intergenic	Intergenic	109476	NM_012234	23429	Hs.7910	NM_012234		RYBP	AAP1|APAP-1|DEDAF|YEAF1	RING1 and YY1 binding protein	protein-coding	9.17	46.76	10.67	2.9	4.43	23.51	9.55	-2.33765
chr15	90046430	90046930	Intergenic	Intergenic	-6836	NR_110261	51458	Hs.459284	NM_016321	ENSG00000140519	RHCG	C15orf6|PDRC2|RHGK|SLC42A3	Rh family C glycoprotein	protein-coding	21.28	36.56	9.28	14.1	1.9	25.83	2.51	-2.3995
chr12	15324171	15324671	intron (NM_032918, intron 2 of 4)	intron (NM_032918, intron 2 of 4)	19564	NR_046559	100873980	Hs.569154	NR_046559	ENSG00000255660	RERG-AS1	-	RERG antisense RNA 1	ncRNA	0.92	0.65	0.89	15.34	12.19	4.33	13.31	2.92042
chr8	29385961	29386461	Intergenic	MER5A|DNA|hAT-Charlie	-177944	NM_001394	1846	Hs.417962	NM_001394	ENSG00000120875	DUSP4	HVH2|MKP-2|MKP2|TYP	dual specificity phosphatase 4	protein-coding	1.65	2.75	2.37	78.59	9.5	6.81	16.6	2.48424
chr11	27313792	27314292	Intergenic	Intergenic	70753	NM_030771	91057	Hs.143733	NM_030771	ENSG00000109881	CCDC34	L15|NY-REN-41|RAMA3	coiled-coil domain containing 34	protein-coding	2.38	1.78	2.27	20.94	25.01	24.6	22.09	2.99265
chr20	33626910	33627410	intron (NM_015638, intron 7 of 18)	Charlie24|DNA|hAT-Charlie	-48885	NR_039912	100616134		NR_039912	ENSG00000283441	MIR499B	MIR499A|hsa-mir-499b	microRNA 499b	ncRNA	2.93	1.29	2.96	30.07	16.14	74.56	14.25	2.80704
chr17	53397618	53398118	intron (NM_001330375, intron 3 of 3)	intron (NM_001330375, intron 3 of 3)	54285	NM_001330375	3131	Hs.196952	NM_002126	ENSG00000108924	HLF	-	HLF, PAR bZIP transcription factor	protein-coding	13.94	32.2	7.9	3.11	1.58	9.59	4.39	-3.19675
chrX	139122381	139122881	Intergenic	L1M1|LINE|L1	-51195	NM_001271560	389895	Hs.127679	NM_001271560		LOC389895	-	chromosome 16 open reading frame 72-like	protein-coding	0.92	2.43	0.89	28.62	3.64	25.83	0.78	2.8934
chr6	109292317	109292817	intron (NM_032131, intron 17 of 17)	intron (NM_032131, intron 17 of 17)	37624	NM_001199934	27244	Hs.591336	NM_014454	ENSG00000080546	SESN1	PA26|SEST1	sestrin 1	protein-coding	0.73	1.62	2.96	19.91	24.37	16.71	35.4	2.74437
chr3	95985608	95986108	Intergenic	MLT1E|LTR|ERVL-MaLR	-92950	NR_107027	102465864		NR_107027	ENSG00000278103	MIR8060	hsa-mir-8060	microRNA 8060	ncRNA	1.65	2.27	1.68	59.3	31.97	8.66	52	3.98923
chr12	20365588	20366088	Intergenic	Intergenic	-156341	NM_000921	5139	Hs.386791	NM_000921	ENSG00000172572	PDE3A	CGI-PDE|CGI-PDE A|CGI-PDE-A|HTNB	phosphodiesterase 3A	protein-coding	17.79	35.59	8.49	5.6	3.01	8.66	3.45	-2.63021
chr2	129062679	129063179	intron (NM_004807, intron 1 of 1)	intron (NM_004807, intron 1 of 1)	13242	NM_004807	9394	Hs.512841	NM_004807	ENSG00000136720	HS6ST1	HH15|HS6ST	heparan sulfate 6-O-sulfotransferase 1	protein-coding	24.95	47.24	8.2	5.6	3.64	41.46	5.64	-2.52824
chr5	18792295	18792795	Intergenic	LTR18A|LTR|ERVL	985162	NR_134287	646241	Hs.407197	NR_134286		LOC646241	-	uncharacterized LOC646241	ncRNA	5.32	5.34	5.43	128.56	18.68	30.16	27.41	2.40695
chr6	47388135	47388635	Intergenic	Intergenic	-57140	NM_012120	23607	Hs.485518	NM_012120	ENSG00000198087	CD2AP	CMS	CD2 associated protein	protein-coding	0.92	3.07	2.37	15.76	18.99	6.65	15.51	2.37212
chr2	228690838	228691338	Intergenic	Intergenic	12530	NM_001130046	6364	Hs.75498	NM_004591	ENSG00000115009	CCL20	CKb4|Exodus|LARC|MIP-3-alpha|MIP-3a|MIP3A|SCYA20|ST38	C-C motif chemokine ligand 20	protein-coding	21.1	36.24	10.77	3.73	3.96	7.89	4.07	-3.02944
chr17	58243252	58243752	intron (NR_137422, intron 8 of 11)	intron (NR_137422, intron 8 of 11)	16205	NM_000717	762	Hs.89485	NM_000717	ENSG00000167434	CA4	CAIV|Car4|RP17	carbonic anhydrase 4	protein-coding	2.2	3.4	2.17	35.25	9.97	32.79	24.28	2.55594
chr7	65392351	65392851	intron (NM_001284342, intron 1 of 1)	LTR71B|LTR|ERV1	54515	NM_001284342	154807	Hs.427232	NM_173517	ENSG00000196715	VKORC1L1	-	vitamin K epoxide reductase complex subunit 1 like 1	protein-coding	1.83	1.94	1.38	24.68	6.65	13.61	12.06	2.44943
chr13	108806624	108807124	Intergenic	Intergenic	60256	NM_002312	3981	Hs.166091	NM_002312	ENSG00000174405	LIG4	LIG4S	DNA ligase 4	protein-coding	1.47	1.94	1.98	30.9	26.59	40.53	46.83	3.57055
chr7	158300967	158301467	intron (NM_130843, intron 1 of 21)	intron (NM_130843, intron 1 of 21)	24288	NR_030325	693180		NR_030325	ENSG00000207637	MIR595	MIRN595|hsa-mir-595	microRNA 595	ncRNA	1.47	5.82	3.16	16.8	5.22	125.76	42.6	2.50854
chr2	40508464	40508964	intron (NM_021097, intron 1 of 9)	intron (NM_021097, intron 1 of 9)	148730	NM_001112801	6546	Hs.31961	NM_021097	ENSG00000183023	SLC8A1	NCX1	solute carrier family 8 member A1	protein-coding	14.31	20.22	6.52	2.49	2.37	1.55	1.88	-3.47064
chr5	35185595	35186095	intron (NM_000949, intron 1 of 9)	intron (NM_000949, intron 1 of 9)	44846	NM_000949	5618	Hs.368587	NM_000949	ENSG00000113494	PRLR	HPRL|MFAB|hPRLrI	prolactin receptor	protein-coding	1.47	2.43	2.27	26.96	6.81	54.91	5.8	2.9002
chr9	38096173	38096673	Intergenic	Intergenic	-27213	NM_003028	6461	Hs.521482	NM_003028	ENSG00000107338	SHB	bA3J10.2	SH2 domain containing adaptor protein B	protein-coding	16.51	23.78	7.31	1.45	4.11	0.93	2.51	-3.42116
chr4	62406566	62407066	intron (NM_001322402, intron 4 of 25)	intron (NM_001322402, intron 4 of 25)	339842	NM_015236	23284	Hs.28391	NM_015236	ENSG00000150471	ADGRL3	CIRL3|CL3|LEC3|LPHN3	adhesion G protein-coupled receptor L3	protein-coding	3.49	1.94	1.78	44.58	16.62	79.2	45.58	3.155
chr7	92336726	92337226	intron (NM_001145306, intron 4 of 7)	intron (NM_001145306, intron 4 of 7)	-117268	NR_109929	257415	Hs.18564	NM_152789	ENSG00000234545	FAM133B	-	family with sequence similarity 133 member B	protein-coding	1.65	1.13	0.99	16.38	8.07	1.39	13.16	2.4694
chr2	60321549	60322049	Intergenic	Intergenic	288372	NR_132991	106660609	Hs.565545	NR_132991	ENSG00000223929	MIR4432HG	-	MIR4432 host gene	ncRNA	1.65	3.24	3.56	58.68	9.02	21.19	41.19	2.83085
chr15	89694088	89694588	intron (NM_152924, intron 3 of 10)	intron (NM_152924, intron 3 of 10)	62957	NM_152924	11057	Hs.122337	NM_007011	ENSG00000140526	ABHD2	HS1-2|LABH2|PHPS1-2	abhydrolase domain containing 2	protein-coding	2.38	4.21	1.68	39.61	9.02	18.56	37.44	2.57793
chr2	206753825	206754325	Intergenic	MLT1I|LTR|ERVL-MaLR	196831	NM_017759	54891	Hs.445036	NM_017759	ENSG00000114933	INO80D	-	INO80 complex subunit D	protein-coding	10.09	29.28	4.94	1.24	2.85	15.62	3.13	-2.39635
chr1	149192646	149193146	Intergenic	Intergenic	-83171	NR_104217	101929780	Hs.534675	NR_104217	ENSG00000272150	NBPF25P	WI2-925H4.1	neuroblastoma breakpoint family member 25, pseudogene	pseudo	2.57	3.07	1.09	20.32	5.7	14.7	17.54	2.33658
chr7	55145243	55145743	intron (NM_001346941, intron 1 of 21)	intron (NM_001346941, intron 1 of 21)	-32017	NM_001346900	1956	Hs.488293	NM_005228	ENSG00000146648	EGFR	ERBB|ERBB1|HER1|NISBD2|PIG61|mENA	epidermal growth factor receptor	protein-coding	15.41	5.82	3.95	95.18	698.42	26.61	38.69	4.42491
chr9	140683150	140683650	intron (NM_024757, intron 15 of 26)	CpG	25926	NR_024341	643210	Hs.721002	NM_001039765		EHMT1-IT1	-	EHMT1 intronic transcript 1	ncRNA	6.79	7.93	4.64	71.75	16.78	154.22	41.82	2.72775
chr7	128021442	128021942	Intergenic	Intergenic	-19953	NM_001114726	401399	Hs.381096	NM_001114726	ENSG00000224940	PRRT4	-	proline rich transmembrane protein 4	protein-coding	17.43	27.5	7.9	3.53	2.85	7.27	7.99	-2.86028
chr3	43220450	43220950	Intergenic	Intergenic	-73125	NM_032806	84892	Hs.745002	NM_032806	ENSG00000144647	POMGNT2	AGO61|C3orf39|GTDC2|MDDGA8	protein O-linked mannose N-acetylglucosaminyltransferase 2 (beta 1,4-)	protein-coding	2.57	4.21	3.56	36.08	11.24	79.05	28.35	2.36683
chr8	124965213	124965713	intron (NM_001039112, intron 1 of 40)	intron (NM_001039112, intron 1 of 40)	87560	NR_040044	439941	Hs.683919	NM_001038706	ENSG00000181171	FER1L6-AS1	C8orf54	FER1L6 antisense RNA 1	ncRNA	2.75	2.43	2.67	6.01	25.8	8.82	36.03	2.60933
chr1	213862484	213862984	Intergenic	Intergenic	-235358	NR_046189	100861504	Hs.742586	NR_046189		LINC00538	PROX1UT|Yiya	long intergenic non-protein coding RNA 538	ncRNA	21.28	35.76	9.09	6.01	3.32	4.49	5.17	-3.36023
chr4	173903227	173903727	intron (NM_001034845, intron 10 of 12)	MamRep1527|LTR|LTR	-186427	NM_017423	51809	Hs.548088	NM_017423	ENSG00000109586	GALNT7	GALNAC-T7|GalNAcT7	polypeptide N-acetylgalactosaminyltransferase 7	protein-coding	18.53	30.09	9.28	6.43	4.27	4.02	6.58	-2.49454
chr13	95210942	95211442	Intergenic	MER51A|LTR|ERV1	-9525	NM_001322183	1638	Hs.301865	NM_001922	ENSG00000080166	DCT	TRP-2|TYRP2	dopachrome tautomerase	protein-coding	2.57	0.81	0.99	7.05	2.06	34.96	47.46	2.79469
chr2	60318994	60319494	Intergenic	Intergenic	290927	NR_132991	106660609	Hs.565545	NR_132991	ENSG00000223929	MIR4432HG	-	MIR4432 host gene	ncRNA	1.65	2.43	2.57	26.13	9.81	11.45	16.29	2.58495
chr5	34466634	34467134	Intergenic	HERVK11D-int|LTR|ERVK	-189549	NM_015577	26064	Hs.431400	NM_015577	ENSG00000039560	RAI14	NORPEG|RAI13	retinoic acid induced 14	protein-coding	0.73	0.97	2.37	29.44	7.28	27.69	14.1	2.48615
chr3	93802059	93802559	intron (NM_022072, intron 2 of 5)	MER51A|LTR|ERV1	-20242	NM_001195643	200895	Hs.718516	NM_176815	ENSG00000178700	DHFR2	DHFRL1|DHFRP4	dihydrofolate reductase 2	protein-coding	2.2	0.97	2.96	51.63	6.96	36.51	22.24	2.99757
chr5	79252161	79252661	intron (NR_131226, intron 2 of 2)	intron (NR_131226, intron 2 of 2)	20009	NR_131226	105616916	Hs.590325	NR_131226	ENSG00000250888	LINC01455	MDONA|TCONS_00009433	long intergenic non-protein coding RNA 1455	ncRNA	17.06	79.11	11.06	2.28	1.9	2.63	1.57	-4.99172
chr4	6495354	6495854	intron (NM_001206995, intron 2 of 9)	intron (NM_001206995, intron 2 of 9)	-21278	NM_020416	5522	Hs.479069	NM_020416	ENSG00000074211	PPP2R2C	B55-GAMMA|IMYPNO|IMYPNO1|PR52|PR55G	protein phosphatase 2 regulatory subunit Bgamma	protein-coding	20.18	47.89	8.3	6.22	2.85	16.4	27.25	-2.32591
chr9	112069594	112070094	intron (NM_018424, intron 1 of 15)	intron (NM_018424, intron 1 of 15)	13400	NM_018424	54566	Hs.591901	NM_018424	ENSG00000095203	EPB41L4B	CG1|EHM2	erythrocyte membrane protein band 4.1 like 4B	protein-coding	1.65	3.24	2.47	46.24	7.91	179.13	19.11	3.75779
chr20	11025992	11026492	Intergenic	Intergenic	-136322	NR_109866	101929413	Hs.385604	NR_109866	ENSG00000232900	LOC101929413	-	uncharacterized LOC101929413	ncRNA	2.57	1.78	1.09	29.65	20.26	8.97	4.39	2.48478
chr3	143151592	143152092	intron (NM_173653, intron 12 of 15)	intron (NM_173653, intron 12 of 15)	90754	NR_048544	100885796	Hs.581618	NR_048544	ENSG00000240012	SLC9A9-AS1	-	SLC9A9 antisense RNA 1	ncRNA	0.55	1.62	2.47	15.97	14.24	17.17	5.95	2.33513
chr7	75975333	75975833	intron (NM_012479, intron 1 of 1)	intron (NM_012479, intron 1 of 1)	12759	NM_012479	7532	Hs.744840	NM_012479	ENSG00000170027	YWHAG	14-3-3GAMMA|PPP1R170	tyrosine 3-monooxygenase/tryptophan 5-monooxygenase activation protein gamma	protein-coding	5.32	2.1	2.67	49.56	15.83	50.27	32.89	2.48927
chr12	121463469	121463969	intron (NM_198213, intron 3 of 4)	intron (NM_198213, intron 3 of 4)	-9414	NM_001286197	64897	Hs.528671	NM_022895	ENSG00000157895	C12orf43	-	chromosome 12 open reading frame 43	protein-coding	2.57	4.85	1.98	16.38	12.19	63.58	27.1	2.35279
chr10	9866671	9867171	Intergenic	LTR9|LTR|ERV1	-233764	NR_120636	101928298	Hs.385576	NR_120636	ENSG00000224788	LOC101928298	-	uncharacterized LOC101928298	ncRNA	2.02	1.29	1.88	31.93	25.64	24.29	47.3	3.04937
chr5	95583004	95583504	intron (NR_130776, intron 1 of 4)	intron (NR_130776, intron 1 of 4)	168412	NR_030309	693168		NR_030309	ENSG00000207578	MIR583	MIRN583|hsa-mir-583	microRNA 583	ncRNA	19.99	37.37	6.72	3.94	2.37	2.01	2.98	-3.97581
chr1	167766178	167766678	Intergenic	Intergenic	75241	NM_001146191	9019	Hs.493919	NM_003953	ENSG00000197965	MPZL1	MPZL1b|PZR|PZR1b|PZRa|PZRb	myelin protein zero like 1	protein-coding	8.25	29.28	7.7	1.66	3.17	5.1	4.39	-2.81278
chr2	108917951	108918451	intron (NM_176825, intron 5 of 8)	L2c|LINE|L2	13106	NM_176825	6819	Hs.436123	NM_001056	ENSG00000198203	SULT1C2	ST1C1|ST1C2|SULT1C1|humSULTC2	sulfotransferase family 1C member 2	protein-coding	0.92	1.29	2.07	20.11	8.55	20.88	32.42	2.75864
chr11	111230876	111231376	intron (NM_006235, intron 1 of 4)	intron (NM_006235, intron 1 of 4)	12644	NR_039712	100616330		NR_039712	ENSG00000264032	MIR4491	mir-4491	microRNA 4491	ncRNA	2.38	3.07	4.84	75.06	52.23	87.4	91.79	3.66823
chr8	8937373	8937873	Intergenic	LTR56|LTR|ERV1	31668	NR_039804	100616350		NR_039804	ENSG00000263407	MIR4660	-	microRNA 4660	ncRNA	5.32	2.91	2.17	149.92	9.34	22.43	26.78	3.03091
chr11	7626637	7627137	promoter-TSS (NM_001256569)	promoter-TSS (NM_001256569)	-78	NM_001256569	8495	Hs.655714	NM_003621	ENSG00000166387	PPFIBP2	Cclp1	PPFIA binding protein 2	protein-coding	1.65	2.1	3.16	27.58	22.32	17.17	31.01	2.57665
chr2	40077232	40077732	Intergenic	L2c|LINE|L2	-67292	NR_038441	100128590	Hs.744988	NR_038441	ENSG00000227028	SLC8A1-AS1	-	SLC8A1 antisense RNA 1	ncRNA	0.73	1.62	2.17	15.97	9.81	10.52	11.28	2.6745
chr21	46682396	46682896	Intergenic	MER57C1|LTR|ERV1	25165	NM_133635	23275	Hs.592164	NM_015227	ENSG00000186866	POFUT2	C21orf80|FUT13	protein O-fucosyltransferase 2	protein-coding	1.47	2.1	1.38	4.15	2.85	19.8	21.77	2.3245
chr8	119890680	119891180	Intergenic	Intergenic	73453	NM_002546	4982	Hs.81791	NM_002546	ENSG00000164761	TNFRSF11B	OCIF|OPG|PDB5|TR1	TNF receptor superfamily member 11b	protein-coding	0.92	0.49	1.68	11.2	12.66	5.72	15.04	2.53533
chr16	14750308	14750808	intron (NM_001330500, intron 3 of 5)	L1MC|LINE|L1	23890	NM_016561	51283	Hs.435556	NM_016561	ENSG00000103429	BFAR	BAR|RNF47	bifunctional apoptosis regulator	protein-coding	5.14	4.53	2.07	29.86	16.46	32.48	41.35	2.41457
chr12	133484870	133485370	Intergenic	CpG	20692	NR_110919	101928530	Hs.560003	NR_110919	ENSG00000236617	LOC101928530	-	uncharacterized LOC101928530	ncRNA	17.61	70.05	16.3	7.88	4.75	10.21	8.46	-2.9799
chr19	33591969	33592469	intron (NM_018025, intron 8 of 19)	intron (NM_018025, intron 8 of 19)	20433	NM_018025	55094	Hs.466436	NM_018025	ENSG00000076650	GPATCH1	ECGP|GPATC1	G-patch domain containing 1	protein-coding	1.65	1.13	2.77	10.58	8.55	41.77	33.05	2.55752
chr9	6779828	6780328	intron (NM_015061, intron 1 of 21)	intron (NM_015061, intron 1 of 21)	22437	NM_001304341	23081	Hs.709425	NM_015061	ENSG00000107077	KDM4C	GASC1|JHDM3C|JMJD2C|TDRD14C	lysine demethylase 4C	protein-coding	0.92	1.13	1.28	10.99	12.03	8.51	22.24	3.12916
chr12	53319904	53320404	promoter-TSS (NM_001256282)	promoter-TSS (NM_001256282)	99	NM_001256282	3856	Hs.533782	NM_002273	ENSG00000170421	KRT8	CARD2|CK-8|CK8|CYK8|K2C8|K8|KO	keratin 8	protein-coding	3.49	13.75	3.75	49.77	27.54	161.96	67.51	2.67301
chr10	106078824	106079324	intron (NM_001272013, intron 1 of 1)	intron (NM_001272013, intron 1 of 1)	-4048	NR_120622	101927472	Hs.670333	NR_120622		LOC101927472	-	uncharacterized LOC101927472	ncRNA	15.04	56.63	9.18	3.53	3.01	4.18	4.39	-3.60783
chr6	96252933	96253433	Intergenic	Intergenic	-210662	NM_006581	10690	Hs.49117	NM_006581	ENSG00000172461	FUT9	Fuc-TIX	fucosyltransferase 9	protein-coding	1.28	0.97	2.17	17.21	15.51	8.97	32.74	3.09872
chr11	128161625	128162125	Intergenic	Intergenic	230330	NM_005238	2113	Hs.369438	NM_005238	ENSG00000134954	ETS1	ETS-1|EWSR2|c-ets-1|p54	ETS proto-oncogene 1, transcription factor	protein-coding	2.38	1.46	1.88	14.93	22.63	14.54	31.17	2.95626
chr7	100540056	100540556	Intergenic	Intergenic	-6746	NM_005960	4584	Hs.703577	NM_005960	ENSG00000169894	MUC3A	MUC-3A|MUC3	mucin 3A, cell surface associated	protein-coding	1.65	0.97	0.4	34.21	4.27	8.35	7.83	2.80453
chr2	228786288	228786788	intron (NR_138459, intron 13 of 13)	intron (NR_138459, intron 13 of 13)	50446	NR_138459	164781	Hs.424594	NM_178821	ENSG00000123977	DAW1	ODA16|WDR69	dynein assembly factor with WD repeats 1	protein-coding	0.73	1.46	2.17	12.23	12.98	5.57	9.55	2.442
chr11	15805023	15805523	Intergenic	Intergenic	139842	NM_001293172	102724957	Hs.512245	NM_001293172	ENSG00000254695	LOC102724957	-	uncharacterized LOC102724957	protein-coding	22.75	33.65	8.59	3.53	1.58	9.9	2.66	-3.40293
chr10	49879483	49879983	Intergenic	Intergenic	-13785	NM_020945	57705	Hs.287379	NM_020945	ENSG00000283652	WDFY4	C10orf64	WDFY family member 4	protein-coding	10.46	33	6.81	4.56	3.48	19.18	2.35	-2.35696
chr7	141851812	141852312	intron (NM_001293626, intron 15 of 47)	intron (NM_001293626, intron 15 of 47)	40513	NM_001293626	93432	Hs.647098	NM_001008748	ENSG00000257743	MGAM2	-	maltase-glucoamylase 2 (putative)	protein-coding	0.73	0.81	1.48	6.43	13.45	11.91	11.28	2.80455
chr7	2611584	2612084	exon (NM_001287499, exon 5 of 21)	exon (NM_001287499, exon 5 of 21)	13228	NM_001287499	23288	Hs.520627	NM_152558	ENSG00000106012	IQCE	1700028P05Rik	IQ motif containing E	protein-coding	3.12	3.24	2.07	53.71	18.83	96.06	22.09	2.82107
chr6	122992351	122992851	intron (NM_001270395, intron 1 of 4)	intron (NM_001270395, intron 1 of 4)	18727	NM_001270395	5570	Hs.741340	NM_032471	ENSG00000135549	PKIB	PRKACN2	cAMP-dependent protein kinase inhibitor beta	protein-coding	1.28	0.81	1.09	15.34	6.49	5.41	7.21	2.32565
chr20	47903623	47904123	intron (NR_003605, intron 4 of 4)	LTR10B1|LTR|ERV1	6653	NR_003030	692057		NR_003030	ENSG00000212304	SNORD12	HBII-99|MIR1259|MIRN1259	small nucleolar RNA, C/D box 12	snoRNA	2.93	2.1	2.17	19.28	10.45	51.82	18.48	2.50629
chr5	83074908	83075408	Intergenic	MSTD|LTR|ERVL-MaLR	-58262	NM_001884	1404	Hs.2799	NM_001884	ENSG00000145681	HAPLN1	CRT1|CRTL1	hyaluronan and proteoglycan link protein 1	protein-coding	1.1	1.94	2.47	45	20.57	19.95	27.88	3.38365
chr2	174888608	174889108	Intergenic	LTR33|LTR|ERVL	-1150	NR_136175	100128905	Hs.456944	NR_136175	ENSG00000260868	LINC01960	-	long intergenic non-protein coding RNA 1960	ncRNA	20.36	37.7	9.68	4.15	4.43	15.62	6.74	-2.76762
chr3	136703643	136704143	intron (NM_144717, intron 3 of 6)	intron (NM_144717, intron 3 of 6)	27186	NM_144717	53833	Hs.61232	NM_144717	ENSG00000174564	IL20RB	DIRS1|FNDC6|IL-20R2	interleukin 20 receptor subunit beta	protein-coding	17.98	39.64	8.69	7.67	3.8	11.45	4.54	-2.6769
chr2	169349693	169350193	intron (NM_203463, intron 1 of 9)	MIR|SINE|MIR	37184	NM_001256126	253782	Hs.506829	NM_203463	ENSG00000172292	CERS6	CERS5|LASS6	ceramide synthase 6	protein-coding	1.28	1.29	1.28	8.09	8.07	26.76	14.57	2.57605
chr16	17369118	17369618	intron (NM_022166, intron 2 of 11)	intron (NM_022166, intron 2 of 11)	141007	NR_135179	102723692	Hs.737758	NR_135179	ENSG00000261448	LOC102723692	-	uncharacterized LOC102723692	ncRNA	4.95	3.56	2.37	48.73	22.95	49.65	45.42	2.68112
chr9	89369475	89369975	Intergenic	Intergenic	192379	NM_002048	2619	Hs.65029	NM_002048	ENSG00000180447	GAS1	-	growth arrest specific 1	protein-coding	12.47	21.52	5.93	1.24	5.7	3.4	2.66	-2.46397
chr4	52775340	52775840	intron (NM_015115, intron 8 of 9)	intron (NM_015115, intron 8 of 9)	65845	NM_001287755	23142	Hs.605388	NM_015115	ENSG00000109184	DCUN1D4	-	defective in cullin neddylation 1 domain containing 4	protein-coding	2.93	4.04	2.67	38.36	15.98	47.95	39.47	2.61784
chr3	179514917	179515417	3' UTR (NM_001256750, exon 15 of 15)	3' UTR (NM_001256750, exon 15 of 15)	-100815	NR_110059	101928790	Hs.667247	NR_110059	ENSG00000244302	PEX5L-AS2	-	PEX5L antisense RNA 2	ncRNA	1.83	0.65	1.28	21.57	12.34	1.08	14.1	2.61832
chr1	66727846	66728346	intron (NM_001037340, intron 4 of 14)	MIRc|SINE|MIR	-69695	NM_001037339	5142	Hs.198072	NM_002600	ENSG00000184588	PDE4B	DPDE4|PDEIVB	phosphodiesterase 4B	protein-coding	8.25	19.74	4.94	2.9	1.9	2.32	2.66	-2.50867
chr3	167695830	167696330	Intergenic	Intergenic	82344	NR_033843	646168	Hs.390443	NR_033843	ENSG00000244227	LINC01330	-	long intergenic non-protein coding RNA 1330	pseudo	2.38	2.43	3.75	58.06	8.55	36.35	14.72	2.5098
chr17	29981911	29982411	Intergenic	Intergenic	79731	NR_029856	100126356		NR_029856	ENSG00000228768	MIR365B	MIR365-2|MIRN365-2|hsa-mir-365b|mir-365b	microRNA 365b	ncRNA	18.89	36.08	7.6	2.9	2.06	7.58	2.19	-3.80503
chr8	24109000	24109500	Intergenic	LTR22A|LTR|ERVK	-42303	NM_014265	10863	Hs.174030	NM_014265	ENSG00000042980	ADAM28	ADAM 28|MDC-L|MDCL|eMDC II|eMDCII	ADAM metallopeptidase domain 28	protein-coding	2.02	2.27	1.98	20.94	11.55	33.72	9.24	2.58324
chr10	42863285	42863785	promoter-TSS (NR_024380)	promoter-TSS (NR_024380)	-42	NR_024380	441666	Hs.255729	NR_024380	ENSG00000215146	LOC441666	-	zinc finger protein 91 pseudogene	pseudo	11.92	21.68	6.12	2.28	4.43	2.32	2.35	-2.70655
chr2	208646835	208647335	Intergenic	Intergenic	-12942	NM_003468	7855	Hs.17631	NM_003468	ENSG00000163251	FZD5	C2orf31|HFZ5	frizzled class receptor 5	protein-coding	0.73	3.07	1.78	8.71	14.09	24.9	31.8	3.02792
chr9	75733796	75734296	Intergenic	Intergenic	-32601	NM_000700	301	Hs.494173	NM_000700	ENSG00000135046	ANXA1	ANX1|LPC1	annexin A1	protein-coding	10.82	13.75	3.95	1.66	1.42	2.94	3.6	-2.63855
chr4	170106541	170107041	intron (NM_020870, intron 2 of 11)	intron (NM_020870, intron 2 of 11)	85458	NM_020870	57630	Hs.301804	NM_020870	ENSG00000154447	SH3RF1	POSH|RNF142|SH3MD2	SH3 domain containing ring finger 1	protein-coding	2.38	2.1	2.77	18.87	11.87	10.83	42.92	2.52601
chr2	215936401	215936901	intron (NR_103740, intron 2 of 54)	intron (NR_103740, intron 2 of 54)	-39841	NM_015657	26154	Hs.134585	NM_015657	ENSG00000144452	ABCA12	ARCI4A|ARCI4B|ICR2B|LI2	ATP binding cassette subfamily A member 12	protein-coding	12.47	35.76	6.32	3.32	3.17	1.55	3.92	-3.10052
chr8	130961499	130961999	intron (NR_046360, intron 2 of 14)	intron (NR_046360, intron 2 of 14)	-9598	NM_001330612	51571	Hs.126941	NM_016623	ENSG00000153310	FAM49B	BM-009|L1	family with sequence similarity 49 member B	protein-coding	0.37	0.65	1.19	9.95	3.01	28.15	3.45	2.60464
chr2	55172856	55173356	intron (NM_001039753, intron 27 of 40)	intron (NM_001039753, intron 27 of 40)	64364	NM_007008	57142	Hs.637850	NM_007008	ENSG00000115310	RTN4	ASY|NI220/250|NOGO|NOGO-A|NOGOC|NSP|NSP-CL|Nbla00271|Nbla10545|Nogo-B|Nogo-C|RTN-X|RTN4-A|RTN4-B1|RTN4-B2|RTN4-C	reticulon 4	protein-coding	14.31	33.81	8.99	3.11	3.48	8.35	1.88	-3.43876
chr9	111113831	111114331	Intergenic	Intergenic	504194	NM_006686	10880	Hs.534390	NM_006686	ENSG00000148156	ACTL7B	Tact1	actin like 7B	protein-coding	9.72	18.77	3.56	6.64	0.47	2.01	2.66	-2.69435
chr7	16639440	16639940	3' UTR (NM_020319, exon 10 of 10)	3' UTR (NM_020319, exon 10 of 10)	45752	NM_020319	57037	Hs.157378	NM_020319	ENSG00000106524	ANKMY2	ZMYND20	ankyrin repeat and MYND domain containing 2	protein-coding	1.28	1.13	2.27	14.72	11.71	12.53	20.05	2.52593
chr18	8960690	8961190	Intergenic	Intergenic	-141688	NM_021074	4729	Hs.464572	NM_021074	ENSG00000178127	NDUFV2	CI-24k	NADH:ubiquinone oxidoreductase core subunit V2	protein-coding	1.28	0.65	0.4	22.81	15.51	3.87	6.74	3.72622
chr10	85938907	85939407	intron (NM_207373, intron 2 of 2)	intron (NM_207373, intron 2 of 2)	5603	NM_207373	387695	Hs.298713	NM_207373	ENSG00000188373	C10orf99	AP-57|CSBF|UNQ1833	chromosome 10 open reading frame 99	protein-coding	35.04	87.04	12.74	2.28	1.58	17.33	4.7	-4.0507
chr19	37742440	37742940	promoter-TSS (NR_110718)	promoter-TSS (NR_110718)	-97	NR_110718	101927667	Hs.633102	NR_110718	ENSG00000226686	LINC01535	-	long intergenic non-protein coding RNA 1535	ncRNA	16.33	32.2	5.73	3.11	3.01	5.41	1.57	-3.52914
chr22	33040344	33040844	intron (NM_001135774, intron 6 of 13)	intron (NM_001135774, intron 6 of 13)	-156208	NM_000362	7078	Hs.644633	NM_000362	ENSG00000100234	TIMP3	HSMRK222|K222|K222TA2|SFD	TIMP metallopeptidase inhibitor 3	protein-coding	10.46	33.81	9.98	4.15	2.06	18.41	3.6	-2.74842
chr1	233679312	233679812	Intergenic	Intergenic	-70188	NM_002245	3775	Hs.208544	NM_002245	ENSG00000135750	KCNK1	DPK|HOHO|K2P1|K2p1.1|KCNO1|TWIK-1|TWIK1	potassium two pore domain channel subfamily K member 1	protein-coding	8.44	30.58	7.8	4.15	1.27	17.02	3.13	-2.60347
chr20	33504586	33505086	intron (NM_001076552, intron 8 of 18)	intron (NM_001076552, intron 8 of 18)	38602	NM_001322495	2937	Hs.82327	NM_000178	ENSG00000100983	GSS	GSHS|HEL-S-64p|HEL-S-88n	glutathione synthetase	protein-coding	2.93	2.27	1.78	24.47	23.11	38.83	16.92	2.96214
chr3	149119074	149119574	Intergenic	Intergenic	-23756	NM_014220	4071	Hs.351316	NM_014220	ENSG00000169908	TM4SF1	H-L6|L6|M3S1|TAAL6	transmembrane 4 L six family member 1	protein-coding	1.65	1.94	2.07	24.05	22	12.38	13.31	2.48302
chr11	14443849	14444349	Intergenic	Intergenic	-58047	NM_001177314	22800	Hs.502004	NM_012250	ENSG00000133818	RRAS2	TC21	related RAS viral (r-ras) oncogene homolog 2	protein-coding	5.69	15.37	9.78	1.87	1.42	13.92	3.76	-2.35087
chr1	3786261	3786761	intron (NM_001282669, intron 5 of 6)	MER5B|DNA|hAT-Charlie	12680	NM_001320136	1677	Hs.133089	NM_004402	ENSG00000169598	DFFB	CAD|CPAN|DFF-40|DFF2|DFF40	DNA fragmentation factor subunit beta	protein-coding	2.57	4.21	3.06	1.66	3.64	103.33	35.56	2.4093
chr16	10394714	10395214	Intergenic	MLT1J|LTR|ERVL-MaLR	-84948	NM_001256160	80063	Hs.513343	NM_024997	ENSG00000166669	ATF7IP2	MCAF2	activating transcription factor 7 interacting protein 2	protein-coding	1.1	1.62	1.78	22.81	5.86	43.93	5.33	3.01407
chr5	16881291	16881791	intron (NM_012334, intron 1 of 40)	intron (NM_012334, intron 1 of 40)	54844	NM_012334	4651	Hs.481720	NM_012334	ENSG00000145555	MYO10	-	myosin X	protein-coding	2.75	1.13	1.38	20.94	12.98	23.2	6.27	2.32367
chr1	118643489	118643989	intron (NM_206996, intron 5 of 48)	L2c|LINE|L2	84109	NM_206996	200162	Hs.528821	NM_206996	ENSG00000155761	SPAG17	CT143|PF6	sperm associated antigen 17	protein-coding	2.02	3.56	1.68	35.04	15.51	11.45	46.21	2.92352
chr20	43746241	43746741	Intergenic	Intergenic	-2678	NM_145652	149708	Hs.375031	NM_145652	ENSG00000175121	WFDC5	PRG5|WAP1|dJ211D12.5	WAP four-disulfide core domain 5	protein-coding	1.1	2.27	1.38	31.1	5.54	75.18	9.08	3.13333
chr7	97678302	97678802	Intergenic	Intergenic	-57645	NM_014916	22853	Hs.444179	NM_014916	ENSG00000164715	LMTK2	AATYK2|BREK|KPI-2|KPI2|LMR2|PPP1R100|cprk|hBREK	lemur tyrosine kinase 2	protein-coding	9.36	30.58	8.89	3.73	3.17	4.02	4.07	-2.77198
chr4	57824258	57824758	Intergenic	Intergenic	19318	NM_032313	84273	Hs.8715	NM_032313	ENSG00000084092	NOA1	C4orf14|MTG3|hAtNOS1|hNOA1|mAtNOS1	nitric oxide associated 1	protein-coding	8.62	20.87	8.1	1.45	2.85	9.9	7.05	-2.37336
chr8	120983969	120984469	intron (NM_022783, intron 4 of 8)	MER68B|LTR|ERVL	98324	NM_022783	64798	Hs.112981	NM_022783	ENSG00000155792	DEPTOR	DEP.6|DEPDC6	DEP domain containing MTOR interacting protein	protein-coding	2.2	1.13	2.67	15.14	13.93	4.18	49.97	2.64626
chr10	74209800	74210300	intron (NM_006077, intron 8 of 11)	L2b|LINE|L2	73694	NM_001195519	10367	Hs.524367	NM_006077	ENSG00000107745	MICU1	CALC|CBARA1|EFHA3|MPXPS	mitochondrial calcium uptake 1	protein-coding	0.92	2.1	1.38	6.84	13.61	28.46	18.64	2.78854
chr8	8957750	8958250	Intergenic	Intergenic	50220	NM_024607	79660	Hs.458513	NM_024607	ENSG00000173281	PPP1R3B	GL|PPP1R4|PTG	protein phosphatase 1 regulatory subunit 3B	protein-coding	1.1	0.32	1.78	24.88	6.81	2.94	14.72	3.22338
chr1	109723857	109724357	intron (NM_020775, intron 7 of 21)	intron (NM_020775, intron 7 of 21)	-5064	NM_001284353	57535	Hs.708190	NM_020775	ENSG00000116299	KIAA1324	EIG121	KIAA1324	protein-coding	0.73	3.72	1.78	21.36	11.87	11.45	18.01	2.7369
chr2	42263522	42264022	Intergenic	Intergenic	-11389	NM_138370	91461	Hs.408542	NM_138370	ENSG00000162878	PKDCC	SGK493|Vlk	protein kinase domain containing, cytoplasmic	protein-coding	0.92	1.29	1.09	14.1	6.49	19.03	7.21	2.45904
chr8	139272178	139272678	intron (NM_015912, intron 4 of 19)	LTR22B|LTR|ERVK	236637	NM_015912	51059	Hs.126024	NM_015912	ENSG00000147724	FAM135B	C8ORFK32	family with sequence similarity 135 member B	protein-coding	1.28	1.46	1.88	40.85	11.71	13.92	16.76	2.82921
chr9	134481522	134482022	intron (NM_001304275, intron 11 of 23)	intron (NM_001304275, intron 11 of 23)	-75110	NM_001135954	83549	Hs.9597	NM_031432	ENSG00000130717	UCK1	URK1	uridine-cytidine kinase 1	protein-coding	2.75	2.43	2.07	15.76	8.07	40.53	17.86	2.38801
chr4	74889425	74889925	Intergenic	Intergenic	14815	NM_002090	2921	Hs.89690	NM_002090	ENSG00000163734	CXCL3	CINC-2b|GRO3|GROg|MIP-2b|MIP2B|SCYB3	C-X-C motif chemokine ligand 3	protein-coding	1.1	1.13	1.98	18.04	19.15	8.51	39.63	3.23592
chr11	123461210	123461710	intron (NM_001330396, intron 4 of 19)	intron (NM_001330396, intron 4 of 19)	30490	NM_001286564	57476	Hs.144725	NM_020716	ENSG00000023171	GRAMD1B	-	GRAM domain containing 1B	protein-coding	6.42	8.09	8.59	76.93	17.41	131.79	132.83	2.48293
chr3	137706897	137707397	Intergenic	Intergenic	-10511	NM_001002026	51208	Hs.655324	NM_016369	ENSG00000066405	CLDN18	SFTA5|SFTPJ	claudin 18	protein-coding	4.4	3.4	1.98	21.98	28.01	38.67	37.12	2.66903
chr22	18916945	18917445	intron (NM_016335, intron 3 of 14)	intron (NM_016335, intron 3 of 14)	6769	NM_001195226	5625	Hs.517352	NM_016335	ENSG00000100033	PRODH	HSPOX2|PIG6|POX|PRODH1|PRODH2|TP53I6	proline dehydrogenase 1	protein-coding	20.91	61.96	11.06	10.78	2.53	28.93	9.08	-2.3304
chr14	79511548	79512048	intron (NM_001330195, intron 15 of 20)	intron (NM_001330195, intron 15 of 20)	-154527	NR_135159	105370586		NR_135159	ENSG00000258419	LOC105370586	-	uncharacterized LOC105370586	ncRNA	10.27	28.8	8.1	1.87	3.48	19.34	2.66	-2.37475
chr8	66629480	66629980	3' UTR (NM_001242318, exon 13 of 13)	3' UTR (NM_001242318, exon 13 of 13)	47622	NM_001145838	9650	Hs.584788	NM_014637	ENSG00000066855	MTFR1	CHPPR|FAM54A2	mitochondrial fission regulator 1	protein-coding	2.75	4.04	3.85	23.02	16.46	39.29	56.08	2.47675
chr9	4933206	4933706	Intergenic	Intergenic	-51630	NM_001322194	3717	Hs.656213	NM_004972	ENSG00000096968	JAK2	JTK10|THCYT3	Janus kinase 2	protein-coding	17.24	32.68	5.93	1.24	3.17	1.86	5.64	-3.12351
chr2	188649815	188650315	Intergenic	L2a|LINE|L2	-230833	NM_006287	7035	Hs.516578	NM_006287	ENSG00000003436	TFPI	EPI|LACI|TFI|TFPI1	tissue factor pathway inhibitor	protein-coding	0.92	0.32	1.28	7.46	16.3	3.87	41.35	3.50816
chr7	5128013	5128513	Intergenic	Intergenic	16572	NR_015343	389458	Hs.733005	NM_203393	ENSG00000273313	RBAKDN	-	RBAK downstream neighbor (non-protein coding)	ncRNA	2.93	0.81	1.28	22.81	1.74	37.13	14.57	2.38913
chr3	128945185	128945685	Intergenic	Intergenic	-23018	NM_016128	22820	Hs.518250	NM_016128	ENSG00000181789	COPG1	COPG	coatomer protein complex subunit gamma 1	protein-coding	9.91	25.08	6.02	3.11	2.22	9.59	6.27	-2.33036
chr17	66560768	66561268	intron (NM_017565, intron 1 of 10)	intron (NM_017565, intron 1 of 10)	-6450	NR_027751	54757	Hs.268874	NM_017565	ENSG00000108950	FAM20A	AI1G|AIGFS|FP2747	FAM20A, golgi associated secretory pathway pseudokinase	protein-coding	17.61	45.79	5.83	1.24	3.64	2.94	1.41	-4.02428
chr11	48348618	48349118	Intergenic	L1PA10|LINE|L1	2375	NM_001004702	256144	Hs.553656	NM_001004702	ENSG00000176547	OR4C3	OR11-98	olfactory receptor family 4 subfamily C member 3	protein-coding	0.73	1.94	2.17	12.23	2.53	1.55	28.04	2.50489
chr13	47181788	47182288	intron (NM_001164211, intron 1 of 19)	intron (NM_001164211, intron 1 of 19)	54742	NM_015116	23143	Hs.507971	NM_015116	ENSG00000136141	LRCH1	CHDC1|NP81	leucine rich repeats and calponin homology domain containing 1	protein-coding	2.75	0.49	1.68	35.04	12.98	60.02	10.34	3.32482
chr13	102769424	102769924	intron (NM_001321945, intron 2 of 5)	intron (NM_001321945, intron 2 of 5)	-71320	NR_039854	100616239		NR_039854	ENSG00000264482	MIR4705	-	microRNA 4705	ncRNA	15.04	22.97	6.22	1.24	1.9	2.01	2.66	-3.76816
chr16	8824051	8824551	intron (NM_001127448, intron 1 of 15)	intron (NM_001127448, intron 1 of 15)	9728	NM_001127448	18	Hs.336768	NM_000663	ENSG00000183044	ABAT	GABA-AT|GABAT|NPD009	4-aminobutyrate aminotransferase	protein-coding	11.01	17.31	7.9	2.49	1.27	16.71	2.98	-2.70129
chr13	23500454	23500954	Intergenic	CpG	-10196	NR_138043	100996930	Hs.380803	NR_138043		LINC00621	-	long intergenic non-protein coding RNA 621	ncRNA	13.76	27.67	11.26	3.32	1.74	24.29	6.58	-2.41044
chr3	98270503	98271003	Intergenic	MIR3|SINE|MIR	20010	NM_005290	2838	Hs.162987	NM_005290	ENSG00000154165	GPR15	BOB	G protein-coupled receptor 15	protein-coding	1.28	2.75	1.38	26.54	9.18	5.88	6.58	2.43618
chr9	117541580	117542080	Intergenic	Intergenic	12980	NM_001204344	9966	Hs.23349	NM_005118	ENSG00000181634	TNFSF15	TL1|TL1A|TNLG1B|VEGI|VEGI192A	tumor necrosis factor superfamily member 15	protein-coding	2.2	9.55	8.79	86.26	37.51	126.23	49.34	2.36309
chr3	82559287	82559787	Intergenic	MER52A|LTR|ERV1	-748587	NM_000158	2632	Hs.436062	NM_000158	ENSG00000114480	GBE1	APBD|GBE|GSD4	1,4-alpha-glucan branching enzyme 1	protein-coding	17.06	54.52	8.49	2.07	4.91	3.09	2.66	-3.67665
chr9	140188357	140188857	Intergenic	Intergenic	8096	NM_001004354	441478	Hs.535075	NM_001004354	ENSG00000198435	NRARP	-	NOTCH-regulated ankyrin repeat protein	protein-coding	4.04	5.99	3.16	85.64	28.8	136.59	88.34	3.4924
chr8	37818294	37818794	Intergenic	MIRc|SINE|MIR	5640	NM_000025	155	Hs.2549	NM_000025	ENSG00000188778	ADRB3	BETA3AR	adrenoceptor beta 3	protein-coding	1.83	2.75	2.77	14.51	12.03	52.44	19.58	2.45547
chr7	97401738	97402238	Intergenic	Intergenic	40717	NM_013998	6863	Hs.2563	NM_003182	ENSG00000006128	TAC1	Hs.2563|NK2|NKNA|NPK|TAC2	tachykinin precursor 1	protein-coding	1.65	0.65	0.3	30.69	6.81	16.09	4.07	2.89579
chr8	128053915	128054415	Intergenic	Intergenic	28766	NR_045262	100750225	Hs.571530	NR_045262	ENSG00000253438	PCAT1	PCA1|PCAT-1	prostate cancer associated transcript 1 (non-protein coding)	ncRNA	15.78	32.2	4.25	1.66	1.42	21.97	2.66	-2.47075
chr5	14551332	14551832	Intergenic	LTR40a|LTR|ERVL	-30309	NM_019018	54491	Hs.155085	NM_019018	ENSG00000145569	FAM105A	NET20	family with sequence similarity 105 member A	protein-coding	1.1	0.81	0.99	24.68	3.17	38.52	0.16	2.69613
chr5	159860942	159861442	Intergenic	Intergenic	12275	NM_001282383	9232	Hs.350966	NM_004219	ENSG00000164611	PTTG1	EAP1|HPTTG|PTTG|TUTR1	pituitary tumor-transforming 1	protein-coding	15.96	40.77	7.31	2.7	2.37	4.33	11.12	-2.92515
chr6	74375554	74376054	Intergenic	Intergenic	-12067	NM_012434	26503	Hs.597422	NM_012434	ENSG00000119899	SLC17A5	AST|ISSD|NSD|SD|SIALIN|SIASD|SLD	solute carrier family 17 member 5	protein-coding	3.12	1.29	2.07	36.49	12.03	14.85	33.52	2.8838
chr14	86998553	86999053	Intergenic	LTR16C|LTR|ERVL	-373319	NR_038445	283585	Hs.381998	NR_038445	ENSG00000258804	LINC01148	-	long intergenic non-protein coding RNA 1148	ncRNA	1.28	0.81	1.19	11.61	6.65	11.91	17.23	2.70708
chr2	101441857	101442357	intron (NM_002518, intron 1 of 20)	intron (NM_002518, intron 1 of 20)	5494	NM_002518	4862	Hs.156832	NM_002518	ENSG00000170485	NPAS2	MOP4|PASD4|bHLHe9	neuronal PAS domain protein 2	protein-coding	3.3	1.46	2.27	29.24	20.57	23.67	45.27	3.01057
chr1	239376105	239376605	Intergenic	Intergenic	-173875	NM_001347716	1131	Hs.7138	NM_000740	ENSG00000133019	CHRM3	EGBRS|HM3|PBS	cholinergic receptor muscarinic 3	protein-coding	1.47	2.27	2.07	9.75	15.35	9.13	49.5	2.82038
chr3	31398356	31398856	Intergenic	LTR18A|LTR|ERVL	-175387	NM_178862	201595	Hs.475812	NM_178862	ENSG00000163527	STT3B	CDG1X|SIMP|STT3-B	STT3B, catalytic subunit of the oligosaccharyltransferase complex	protein-coding	8.8	19.74	7.01	2.07	3.8	2.94	2.51	-2.74113
chr16	23435860	23436360	exon (NM_153603, exon 7 of 17)	exon (NM_153603, exon 7 of 17)	28402	NM_153603	91949	Hs.185807	NM_153603	ENSG00000168434	COG7	CDG2E	component of oligomeric golgi complex 7	protein-coding	11.37	26.7	5.53	2.28	1.42	17.79	4.86	-2.34452
chr13	41469767	41470267	intron (NR_038258, intron 1 of 7)	intron (NR_038258, intron 1 of 7)	25869	NR_038259	100616668	Hs.660718	NR_038258		TPTE2P5	-	transmembrane phosphoinositide 3-phosphatase and tensin homolog 2 pseudogene 5	pseudo	0.55	4.53	1.19	15.55	10.13	35.58	8.61	2.66845
chr10	114760598	114761098	intron (NM_001198531, intron 4 of 12)	intron (NM_001198531, intron 4 of 12)	-44266	NR_132769	106635520		NR_132769		SNORA87	-	small nucleolar RNA, H/ACA box 87	snoRNA	6.05	25.08	4.64	2.07	0.95	15	2.66	-2.53804
chr4	130994224	130994724	Intergenic	Intergenic	-301841	NR_110753	101927282	Hs.407480	NR_110753	ENSG00000246876	LOC101927282	-	uncharacterized LOC101927282	ncRNA	1.47	0.32	0.99	16.38	3.96	12.99	1.25	2.51588
chr9	90524630	90525130	Intergenic	Intergenic	-7997	NM_001145124	441452	Hs.652956	NM_001145124		SPATA31C1	FAM75C1|SPATA31C2	SPATA31 subfamily C member 1	protein-coding	1.28	6.96	4.94	46.45	11.55	127.46	32.74	2.61497
chr3	129200448	129200948	intron (NM_001280546, intron 12 of 27)	intron (NM_001280546, intron 12 of 27)	-41676	NM_001276272	8930	Hs.35947	NM_003925	ENSG00000129071	MBD4	MED1	methyl-CpG binding domain 4, DNA glycosylase	protein-coding	17.79	45.3	9.58	1.45	1.9	4.33	6.58	-3.44896
chr8	123501805	123502305	intron (NR_131202, intron 2 of 3)	intron (NR_131202, intron 2 of 3)	78828	NR_131202	105375734	Hs.628341	NR_131202		LOC105375734	-	uncharacterized LOC105375734	ncRNA	4.04	23.78	3.85	2.7	1.74	8.66	2.98	-2.73019
chr11	94272540	94273040	Intergenic	Intergenic	-4227	NM_002033	2526	Hs.390420	NM_002033	ENSG00000196371	FUT4	CD15|ELFT|FCT3A|FUC-TIV|FUTIV|LeX|SSEA-1	fucosyltransferase 4	protein-coding	4.04	2.27	4.25	13.69	34.03	15	44.8	2.40351
chr11	94867624	94868124	Intergenic	Intergenic	-15829	NR_110303	101929295	Hs.735838	NR_110303	ENSG00000245552	LOC101929295	-	uncharacterized LOC101929295	ncRNA	13.94	28.31	6.62	0.62	4.11	1.86	2.19	-3.23988
chr1	10819444	10819944	intron (NM_017766, intron 2 of 15)	intron (NM_017766, intron 2 of 15)	37039	NM_001079843	54897	Hs.439894	NM_017766	ENSG00000130940	CASZ1	CAS11|CST|SRG|ZNF693|dJ734G22.1	castor zinc finger 1	protein-coding	5.87	6.47	4.15	115.71	19.78	134.89	38.69	2.75881
chr1	192908484	192908984	intron (NR_126003, intron 1 of 2)	intron (NR_126003, intron 1 of 2)	8653	NR_126003	102724954	Hs.243488	NR_126003		LINC01032	-	long intergenic non-protein coding RNA 1032	ncRNA	0.55	1.29	2.37	21.98	6.81	13.92	2.19	2.42077
chr1	240946917	240947417	intron (NM_001282778, intron 16 of 16)	intron (NM_001282778, intron 16 of 16)	-171705	NM_022469	64388	Hs.98206	NM_022469	ENSG00000180875	GREM2	CKTSF1B2|DAND3|PRDC	gremlin 2, DAN family BMP antagonist	protein-coding	0.55	1.29	1.38	24.88	3.01	15.16	6.42	2.54885
chr20	52517541	52518041	Intergenic	Intergenic	-25543	NR_002189	391257	Hs.449977	NR_002189		SUMO1P1	PIC1L|UBL2|UBL6	SUMO1 pseudogene 1	pseudo	2.57	2.43	1.98	34.01	15.98	98.85	11.12	2.67555
chr12	93531714	93532214	intron (NR_040096, intron 3 of 4)	intron (NR_040096, intron 3 of 4)	-36178	NR_120492	102724933	Hs.663947	NR_120492	ENSG00000258171	LOC102724933	-	uncharacterized LOC102724933	ncRNA	14.49	27.67	6.42	1.24	2.37	8.66	5.64	-3.06301
chr2	135441014	135441514	intron (NM_030923, intron 2 of 7)	intron (NM_030923, intron 2 of 7)	35307	NM_030923	81615	Hs.369471	NM_030923	ENSG00000152128	TMEM163	DC29|SV31	transmembrane protein 163	protein-coding	0.92	1.78	1.78	28.82	9.34	17.33	26.16	2.88587
chrY	16021365	16021865	Intergenic	L1PA3|LINE|L1	76773	NM_181880	353513	Hs.170076	NM_181880	ENSG00000129862	VCY1B	BPY1B	variable charge, Y-linked 1B	protein-coding	1.28	0	1.09	39.19	7.6	0	12.06	3.32249
chr12	21597095	21597595	intron (NM_024854, intron 2 of 11)	intron (NM_024854, intron 2 of 11)	6807	NM_024854	79912	Hs.709545	NM_024854	ENSG00000121350	PYROXD1	MFM8	pyridine nucleotide-disulphide oxidoreductase domain 1	protein-coding	1.28	0.81	0.89	18.25	11.71	1.7	9.55	2.48534
chr7	7139987	7140487	Intergenic	Intergenic	-3820	NR_034022	100131257	Hs.551110	NR_034022		LOC100131257	-	zinc finger protein 655 pseudogene	pseudo	19.44	32.36	8.1	2.07	3.17	1.86	7.21	-2.97403
chr7	130569145	130569645	intron (NR_110472, intron 2 of 3)	intron (NR_110472, intron 2 of 3)	-7097	NR_029517	407024		NR_029517	ENSG00000226380	MIR29B1	MIRN29B1|miR-29b|miRNA29B1|mir-29b-1	microRNA 29b-1	ncRNA	8.07	26.05	5.73	1.87	1.58	13.77	6.89	-2.47081
chr10	80349270	80349770	Intergenic	LTR40a|LTR|ERVL	322435	NR_073447	414243	Hs.55047	NR_073447	ENSG00000230417	LINC00595	C10orf101	long intergenic non-protein coding RNA 595	ncRNA	1.65	1.46	1.19	10.99	9.34	12.38	13.47	2.43736
chr8	128230912	128231412	non-coding (NR_108049, exon 1 of 2)	non-coding (NR_108049, exon 1 of 2)	351	NR_108049	100507056	Hs.343864	NR_108049		CCAT1	CARLo-5|onco-lncRNA-40	colon cancer associated transcript 1 (non-protein coding)	ncRNA	0.55	2.27	3.06	14.51	12.98	84.3	19.74	2.71446
chr16	27651454	27651954	intron (NM_015202, intron 5 of 27)	intron (NM_015202, intron 5 of 27)	90236	NM_015202	23247	Hs.460459	NM_015202	ENSG00000047578	KIAA0556	JBTS26	KIAA0556	protein-coding	17.43	28.15	9.68	4.35	1.9	18.56	14.41	-2.32883
chr15	64311964	64312464	intron (NM_014326, intron 2 of 11)	intron (NM_014326, intron 2 of 11)	26307	NM_014326	23604	Hs.237886	NM_014326	ENSG00000035664	DAPK2	DRP-1|DRP1	death associated protein kinase 2	protein-coding	0.92	3.07	2.27	18.87	12.19	35.42	27.72	2.74924
chr12	119646346	119646846	Intergenic	MER126|DNA|DNA	30001	NM_014365	26353	Hs.400095	NM_014365	ENSG00000152137	HSPB8	CMT2L|DHMN2|E2IG1|H11|HMN2|HMN2A|HSP22	heat shock protein family B (small) member 8	protein-coding	13.02	29.77	7.9	2.7	1.58	13.61	4.7	-2.92212
chr2	31094855	31095355	Intergenic	MSTB1|LTR|ERVL-MaLR	-64794	NM_144575	92291	Hs.660911	NM_144575	ENSG00000162949	CAPN13	-	calpain 13	protein-coding	7.7	15.86	5.43	1.87	2.22	13.77	1.25	-2.56162
chr14	68604350	68604850	intron (NM_001321809, intron 7 of 11)	Eulor6D|DNA?|DNA?	314291	NM_001321815	5890	Hs.172587	NM_002877	ENSG00000182185	RAD51B	R51H2|RAD51L1|REC2	RAD51 paralog B	protein-coding	18.16	35.43	5.73	2.28	2.37	9.13	4.54	-2.87203
chr7	101917061	101917561	intron (NM_181500, intron 15 of 22)	intron (NM_181500, intron 15 of 22)	-11042	NM_020979	10603	Hs.489448	NM_020979	ENSG00000160999	SH2B2	APS	SH2B adaptor protein 2	protein-coding	2.93	8.25	3.46	108.24	9.65	72.39	25.69	2.9071
chr17	46037626	46038126	Intergenic	Intergenic	-2633	NM_024320	79170	Hs.368260	NM_024320	ENSG00000167183	PRR15L	ATAD4	proline rich 15 like	protein-coding	2.38	3.07	2.17	24.68	12.5	36.2	30.23	2.65311
chr14	66219704	66220204	Intergenic	Intergenic	282134	NR_030355	693210		NR_030355	ENSG00000207781	MIR625	MIRN625|hsa-mir-625	microRNA 625	ncRNA	0.55	2.75	2.86	19.28	8.23	47.49	16.92	2.59047
chr7	369610	370110	Intergenic	L1MC4a|LINE|L1	39724	NM_001195127	100288524	Hs.702860	NM_001195127		WI2-2373I1.2	-	forkhead box L1-like	ncRNA	2.38	3.56	1.68	33.38	8.86	47.18	19.42	2.6856
chr12	26922098	26922598	intron (NM_002223, intron 2 of 56)	intron (NM_002223, intron 2 of 56)	63783	NM_002223	3709	Hs.512235	NM_002223	ENSG00000123104	ITPR2	ANHD|CFAP48|INSP3R2|IP3R2	inositol 1,4,5-trisphosphate receptor type 2	protein-coding	0.92	1.94	1.09	9.75	7.75	23.2	25.37	2.72968
chr3	73570124	73570624	promoter-TSS (NR_121660)	promoter-TSS (NR_121660)	-99	NR_121660	101927296	Hs.662049	NR_121660		LOC101927296	-	uncharacterized LOC101927296	ncRNA	8.25	25.89	10.17	4.15	2.06	10.21	3.6	-2.74916
chr2	114046111	114046611	Intergenic	Intergenic	-9863	NM_003466	7849	Hs.469728	NM_003466	ENSG00000125618	PAX8	-	paired box 8	protein-coding	2.38	3.4	2.17	32.76	15.98	40.99	28.51	2.44052
chr13	42180711	42181211	intron (NM_015058, intron 39 of 44)	L2b|LINE|L2	-38430	NR_049803	100847026		NR_049803	ENSG00000102763	MIR5006	-	microRNA 5006	ncRNA	0.73	1.29	0.69	12.44	4.43	12.68	3.76	2.55944
chr1	177867931	177868431	Intergenic	Intergenic	70869	NM_033127	89866	Hs.149540	NM_033127	ENSG00000120341	SEC16B	LZTR2|PGPR-p117|RGPR|SEC16S	SEC16 homolog B, endoplasmic reticulum export factor	protein-coding	3.12	3.07	4.05	33.18	14.4	46.1	44.33	2.46734
chr2	112677705	112678205	intron (NM_006343, intron 1 of 18)	intron (NM_006343, intron 1 of 18)	21764	NM_006343	10461	Hs.306178	NM_006343	ENSG00000153208	MERTK	MER|RP38|Tyro12|c-Eyk|c-mer	MER proto-oncogene, tyrosine kinase	protein-coding	1.1	4.21	2.57	24.88	12.34	51.36	29.45	2.56554
chr7	46608606	46609106	Intergenic	Intergenic	127864	NR_134575	730338	Hs.640207	NR_134575	ENSG00000233539	LOC730338	-	uncharacterized LOC730338	ncRNA	8.25	22.33	9.09	2.9	2.69	13.3	6.11	-2.32299
chr20	11497035	11497535	Intergenic	Intergenic	-243254	NR_038972	339593	Hs.434320	NR_038972		LOC339593	-	uncharacterized LOC339593	ncRNA	2.02	0.49	0.79	24.05	20.1	5.41	11.9	3.15996
chr3	17522629	17523129	intron (NM_014744, intron 3 of 21)	MER52A|LTR|ERV1	218633	NM_001134381	9779	Hs.475629	NM_014744	ENSG00000131374	TBC1D5	-	TBC1 domain family member 5	protein-coding	12.47	37.53	9.78	2.07	3.32	0.46	4.7	-3.66036
chr4	174325571	174326071	intron (NM_001329597, intron 2 of 3)	intron (NM_001329597, intron 2 of 3)	-5424	NM_007281	11341	Hs.7122	NM_007281	ENSG00000164106	SCRG1	SCRG-1	stimulator of chondrogenesis 1	protein-coding	1.65	0.81	0.59	14.93	2.06	10.67	15.04	2.45273
chr3	175453600	175454100	intron (NM_207015, intron 11 of 13)	intron (NM_207015, intron 11 of 13)	40271	NR_046714	100874245	Hs.614827	NR_046714		NAALADL2-AS1	-	NAALADL2 antisense RNA 1	ncRNA	0.37	1.62	0.69	16.59	5.38	1.55	10.18	3.00329
chr3	197121416	197121916	Intergenic	Intergenic	-95523	NM_001290983	1739	Hs.292549	NM_004087	ENSG00000075711	DLG1	DLGH1|SAP-97|SAP97|dJ1061C18.1.1|hdlg	discs large MAGUK scaffold protein 1	protein-coding	18.34	47.24	8.1	2.49	3.01	2.78	3.13	-3.89756
chr9	35338522	35339022	intron (NM_001330653, intron 10 of 39)	intron (NM_001330653, intron 10 of 39)	-67980	NR_003582	158381	Hs.575661	NR_003581	ENSG00000179766	ATP8B5P	FetA	ATPase phospholipid transporting 8B5, pseudogene	pseudo	13.21	25.72	5.43	3.32	2.85	2.17	10.34	-2.40224
chr9	31045758	31046258	Intergenic	Intergenic	335480	NR_135134	101929620	Hs.547175	NR_135134	ENSG00000260720	LINC01243	-	long intergenic non-protein coding RNA 1243	ncRNA	1.83	1.29	1.28	7.67	18.36	0.93	26.94	2.7967
chr18	19774137	19774637	intron (NM_005257, intron 6 of 6)	intron (NM_005257, intron 6 of 6)	24989	NM_005257	2627	Hs.514746	NM_005257	ENSG00000141448	GATA6	-	GATA binding protein 6	protein-coding	1.83	1.62	3.85	56.4	19.94	53.68	42.76	3.37526
chr1	65573905	65574405	Intergenic	AluJo|SINE|Alu	-39077	NM_203464	205	Hs.10862	NM_013410	ENSG00000162433	AK4	AK 4|AK3|AK3L1|AK3L2	adenylate kinase 4	protein-coding	1.47	1.29	2.17	21.77	13.45	52.75	41.82	2.93898
chr3	80782851	80783351	Intergenic	LTR4|LTR|ERV1	-259918	NR_132411	728290	Hs.563132	NR_132411	ENSG00000243694	LINC02027	-	long intergenic non-protein coding RNA 2027	ncRNA	3.3	2.1	1.88	23.22	17.25	16.86	21.3	2.36454
chr8	66860652	66861152	Intergenic	Intergenic	-72889	NM_033105	85479	Hs.491885	NM_033105	ENSG00000147570	DNAJC5B	CSP-beta	DnaJ heat shock protein family (Hsp40) member C5 beta	protein-coding	17.98	55.49	8.49	3.53	5.22	17.33	6.89	-2.64534
chr10	105553945	105554445	intron (NM_014631, intron 2 of 13)	intron (NM_014631, intron 2 of 13)	47658	NR_038940	100505839	Hs.655149	NR_038940	ENSG00000280693	SH3PXD2A-AS1	-	SH3PXD2A antisense RNA 1	ncRNA	3.67	7.12	5.14	54.33	21.05	76.26	78.32	2.63099
chr2	28604247	28604747	Intergenic	Intergenic	-11282	NM_005253	2355	Hs.220971	NM_005253	ENSG00000075426	FOSL2	FRA2	FOS like 2, AP-1 transcription factor subunit	protein-coding	5.87	5.18	3.85	71.54	21.68	78.27	38.69	2.38978
chr14	99782581	99783081	Intergenic	Intergenic	-44781	NM_001282237	64919	Hs.709690	NM_022898	ENSG00000127152	BCL11B	ATL1|ATL1-alpha|ATL1-beta|ATL1-delta|ATL1-gamma|CTIP-2|CTIP2|IMD49|RIT1|ZNF856B|hRIT1-alpha	B-cell CLL/lymphoma 11B	protein-coding	2.93	4.37	2.96	117.78	36.4	46.87	62.03	3.67837
chr6	17907927	17908427	intron (NM_022113, intron 2 of 38)	intron (NM_022113, intron 2 of 38)	79677	NM_001105568	63971	Hs.94499	NM_022113	ENSG00000137177	KIF13A	RBKIN|bA500C11.2	kinesin family member 13A	protein-coding	12.66	18.77	6.22	3.11	3.64	4.8	4.23	-2.39186
chr15	63113745	63114245	intron (NM_015059, intron 51 of 55)	intron (NM_015059, intron 51 of 55)	-2161	NR_029709	406965		NR_029709	ENSG00000211137	MIR190A	MIR190|MIRN190|hsa-mir-190a|miR-190|mir-190a	microRNA 190a	ncRNA	0.37	0.97	1.48	17.63	15.67	11.91	25.53	3.62865
chr1	163641019	163641519	Intergenic	MIRc|SINE|MIR	-248288	NR_104294	100422212	Hs.556898	NR_104294		LOC100422212	-	eukaryotic translation initiation factor 3 subunit J pseudogene	pseudo	2.75	2.43	3.46	33.38	7.28	12.07	62.81	2.38013
chr7	98816937	98817437	Intergenic	L2b|LINE|L2	-12075	NM_001145715	402569	Hs.253050	NM_001145715	ENSG00000185467	KPNA7	IPOA8	karyopherin subunit alpha 7	protein-coding	1.1	0.97	1.98	12.23	11.55	8.04	16.92	2.38985
chr11	112204948	112205448	intron (NR_126004, intron 2 of 3)	intron (NR_126004, intron 2 of 3)	63726	NR_126004	283140	Hs.651827	NR_126004	ENSG00000250303	LOC283140	-	uncharacterized LOC283140	ncRNA	16.14	31.39	7.31	2.28	3.01	10.05	3.6	-3.074
chr12	63476834	63477334	Intergenic	Intergenic	69506	NM_000706	552	Hs.2131	NM_000706	ENSG00000166148	AVPR1A	AVPR V1a|AVPR1|V1aR	arginine vasopressin receptor 1A	protein-coding	1.83	0.32	1.38	7.67	12.19	10.98	14.57	2.77535
chr7	17245818	17246318	Intergenic	MIRb|SINE|MIR	-92208	NM_001621	196	Hs.171189	NM_001621	ENSG00000106546	AHR	bHLHe76	aryl hydrocarbon receptor	protein-coding	2.38	1.29	1.28	9.75	24.53	42.54	21.62	3.27279
chr9	32426981	32427481	intron (NM_002197, intron 11 of 20)	intron (NM_002197, intron 11 of 20)	42630	NM_002197	48	Hs.567229	NM_002197	ENSG00000122729	ACO1	ACONS|HEL60|IREB1|IREBP|IREBP1|IRP1	aconitase 1	protein-coding	1.47	1.62	1.68	23.43	6.96	10.21	32.42	2.54838
chr1	167051837	167052337	intron (NM_005814, intron 1 of 6)	intron (NM_005814, intron 1 of 6)	7781	NM_005814	10223	Hs.651244	NM_005814	ENSG00000143167	GPA33	A33	glycoprotein A33	protein-coding	4.22	3.88	3.46	67.39	21.05	89.72	31.01	2.84475
chr2	42283051	42283551	intron (NM_138370, intron 5 of 6)	intron (NM_138370, intron 5 of 6)	8140	NM_138370	91461	Hs.408542	NM_138370	ENSG00000162878	PKDCC	SGK493|Vlk	protein kinase domain containing, cytoplasmic	protein-coding	4.04	4.85	2.86	57.23	28.65	71.93	29.76	2.64776
chr8	86463990	86464490	Intergenic	Helitron2Na_Mam|RC|Helitron?	-87096	NR_121630	100996348	Hs.606624	NR_121630	ENSG00000253549	CA3-AS1	-	CA3 antisense RNA 1	ncRNA	0.55	0.97	1.09	5.39	8.7	6.03	19.74	2.88604
chr11	119864379	119864879	Intergenic	Intergenic	134992	NM_001330382	23650	Hs.504115	NM_012101	ENSG00000137699	TRIM29	ATDC	tripartite motif containing 29	protein-coding	17.24	58.89	10.07	9.33	6.01	13.92	7.52	-2.5131
chr8	11219194	11219694	intron (NR_001578, intron 6 of 8)	intron (NR_001578, intron 6 of 8)	-6467	NR_026814	83656	Hs.583896	NM_054017	ENSG00000184608	FAM167A-AS1	C8orf12	FAM167A antisense RNA 1	ncRNA	3.49	6.8	4.74	108.86	9.65	25.83	24.9	2.39782
chr1	78579828	78580328	intron (NM_017655, intron 3 of 5)	intron (NM_017655, intron 3 of 5)	68489	NM_017655	54810	Hs.603818	NM_017655	ENSG00000137960	GIPC2	SEMCAP-2|SEMCAP2	GIPC PDZ domain containing family member 2	protein-coding	17.79	35.92	8.69	8.29	6.49	8.51	8.93	-2.92775
chr17	59325646	59326146	intron (NM_001330413, intron 23 of 25)	intron (NM_001330413, intron 23 of 25)	119169	NR_136397	101927855	Hs.662123	NR_136397	ENSG00000267131	LOC101927855	-	uncharacterized LOC101927855	ncRNA	0.92	1.46	1.68	12.44	3.48	15.62	7.21	2.32286
chr2	231035190	231035690	exon (NM_004509, exon 17 of 18)	exon (NM_004509, exon 17 of 18)	49387	NM_004510	3431	Hs.145150	NM_004509	ENSG00000135899	SP110	IFI41|IFI75|IPR1|VODI	SP110 nuclear body protein	protein-coding	1.1	2.27	3.06	31.93	11.87	22.89	45.58	3.01794
chr6	90885530	90886030	intron (NM_021813, intron 4 of 8)	MER74B|LTR|ERVL	120847	NM_021813	60468	Hs.269764	NM_021813	ENSG00000112182	BACH2	BTBD25	BTB domain and CNC homolog 2	protein-coding	9.17	19.9	6.32	4.15	3.01	4.02	4.39	-2.3554
chr8	19315621	19316121	intron (NR_024040, intron 4 of 9)	intron (NR_024040, intron 4 of 9)	144185	NM_001130518	55790	Hs.613729	NM_018371	ENSG00000147408	CSGALNACT1	CSGalNAcT-1|ChGn|beta4GalNAcT	chondroitin sulfate N-acetylgalactosaminyltransferase 1	protein-coding	0.37	1.62	2.77	43.96	5.06	13.3	13.94	2.70734
chr22	26889539	26890039	intron (NM_012143, intron 14 of 14)	intron (NM_012143, intron 14 of 14)	9939	NM_001013694	402055	Hs.709914	NM_001013694	ENSG00000100104	SRRD	HC/HCC|SRR1L	SRR1 domain containing	protein-coding	17.98	25.89	6.62	1.45	2.53	1.24	2.66	-3.4859
chr17	65634054	65634554	intron (NM_181671, intron 6 of 9)	intron (NM_181671, intron 6 of 9)	-79645	NM_001303272	25926	Hs.463936	NM_015462	ENSG00000130935	NOL11	-	nucleolar protein 11	protein-coding	14.86	19.25	7.31	4.98	1.74	19.49	2.04	-2.43365
chr6	23728931	23729431	Intergenic	MLT1J|LTR|ERVL-MaLR	-397233	NM_080723	140767	Hs.726270	NM_080723	ENSG00000152954	NRSN1	VMP|p24	neurensin 1	protein-coding	0.73	1.78	2.47	31.52	7.12	5.41	29.76	2.80524
chr6	123439909	123440409	Intergenic	Tigger3b|DNA|TcMar-Tigger	123043	NM_001010852	134829	Hs.486361	NM_001010852	ENSG00000146352	CLVS2	C6orf212|C6orf213|RLBP1L2|bA160A10.4	clavesin 2	protein-coding	2.57	1.46	2.27	15.14	16.14	2.17	42.45	2.41545
chr10	71135259	71135759	intron (NM_001322365, intron 12 of 22)	intron (NM_001322365, intron 12 of 22)	41165	NM_001057	6865	Hs.88372	NM_001057	ENSG00000075073	TACR2	NK2R|NKNAR|SKR|TAC2R	tachykinin receptor 2	protein-coding	18.53	53.88	8.69	2.7	3.96	48.26	6.74	-2.33445
chr8	62646897	62647397	Intergenic	Intergenic	19800	NR_039680	100616484		NR_039680	ENSG00000264408	MIR4470	mir-4470	microRNA 4470	ncRNA	2.57	1.78	0.89	8.09	13.14	6.65	23.03	2.35966
chr20	43035968	43036468	promoter-TSS (NR_037419)	promoter-TSS (NR_037419)	-542	NR_037419	100500813		NR_037419	ENSG00000266151	MIR3646	-	microRNA 3646	ncRNA	5.14	12.13	5.63	99.74	25.32	278.9	122.33	3.16257
chr7	73242501	73243001	Intergenic	Intergenic	-2442	NM_001305	1364	Hs.647036	NM_001305	ENSG00000189143	CLDN4	CPE-R|CPER|CPETR|CPETR1|WBSCR8|hCPE-R	claudin 4	protein-coding	4.4	10.52	4.15	111.97	13.29	97.76	43.39	2.37139
chr7	143671465	143671965	Intergenic	Intergenic	14695	NM_012369	26211	Hs.553595	NM_012369	ENSG00000213215	OR2F1	7M1-2|OLF3|OR14-60|OR2F3|OR2F3P|OR2F4|OR2F5|OR7-139|OR7-140	olfactory receptor family 2 subfamily F member 1 (gene/pseudogene)	protein-coding	0.55	1.46	1.48	14.72	4.75	21.04	5.33	2.3529
chr11	128231222	128231722	Intergenic	Intergenic	160733	NM_005238	2113	Hs.369438	NM_005238	ENSG00000134954	ETS1	ETS-1|EWSR2|c-ets-1|p54	ETS proto-oncogene 1, transcription factor	protein-coding	1.28	2.27	3.85	18.66	14.88	27.69	44.33	2.49779
chr7	86476090	86476590	intron (NM_000840, intron 4 of 5)	LTR40b|LTR|ERVL	118951	NM_152748	222223	Hs.208093	NM_152748	ENSG00000164659	KIAA1324L	EIG121L	KIAA1324 like	protein-coding	2.57	0.97	2.57	51.42	7.44	31.71	34.77	2.74998
chr18	2147868	2148368	Intergenic	MLT1H2|LTR|ERVL-MaLR	423384	NM_022840	64863	Hs.126888	NM_022840	ENSG00000101574	METTL4	HsT661	methyltransferase like 4	protein-coding	12.84	26.86	7.01	1.87	3.32	0.93	1.57	-3.4428
chr4	154140036	154140536	intron (NM_001302693, intron 1 of 2)	intron (NM_001302693, intron 1 of 2)	14720	NM_015271	23321	Hs.435711	NM_015271	ENSG00000109654	TRIM2	CMT2R|RNF86	tripartite motif containing 2	protein-coding	2.02	3.4	1.19	15.55	15.51	22.89	30.7	2.69753
chr16	24712278	24712778	Intergenic	L3|LINE|CR1	-28521	NM_001330520	27327	Hs.655057	NM_014494	ENSG00000090905	TNRC6A	CAGH26|GW1|GW182|TNRC6	trinucleotide repeat containing 6A	protein-coding	6.05	14.72	7.6	4.15	1.9	9.59	3.45	-2.49661
chr6	64492943	64493443	intron (NM_001292009, intron 39 of 43)	MLT1J1|LTR|ERVL-MaLR	136762	NM_015153	23469	Hs.348921	NM_015153	ENSG00000118482	PHF3	-	PHD finger protein 3	protein-coding	2.2	2.59	1.88	28.41	19.15	19.34	32.74	2.83635
chr13	99300265	99300765	Intergenic	MIR3|SINE|MIR	-71110	NM_001032296	8428	Hs.508514	NM_003576	ENSG00000102572	STK24	HEL-S-95|MST3|MST3B|STE20|STK3	serine/threonine kinase 24	protein-coding	0.37	1.78	1.48	19.28	12.34	51.82	18.33	3.56757
chr4	165457950	165458450	Intergenic	Intergenic	-153793	NM_001166373	55016	Hs.592804	NM_017923	ENSG00000145416	MARCH1	MARCH-I|RNF171	membrane associated ring-CH-type finger 1	protein-coding	17.98	35.43	8.59	1.45	1.27	1.08	3.76	-4.12325
chr6	78202208	78202708	Intergenic	Intergenic	-28719	NM_000863	3351	Hs.123016	NM_000863	ENSG00000135312	HTR1B	5-HT-1B|5-HT-1D-beta|5-HT1B|5-HT1DB|HTR1D2|HTR1DB|S12	5-hydroxytryptamine receptor 1B	protein-coding	0.92	0.65	2.57	11.82	17.57	17.48	30.54	2.82143
chr8	120779824	120780324	intron (NM_003184, intron 18 of 25)	L1PA15-16|LINE|L1	65000	NM_003184	6873	Hs.122752	NM_003184	ENSG00000064313	TAF2	CIF150|MRT40|TAF2B|TAFII150	TATA-box binding protein associated factor 2	protein-coding	3.49	10.35	5.23	29.03	24.06	101.78	75.65	2.39868
chr11	16118996	16119496	intron (NM_001145819, intron 7 of 15)	intron (NM_001145819, intron 7 of 15)	-128079	NR_106721	102464826		NR_106721	ENSG00000110693	MIR6073	hsa-mir-6073	microRNA 6073	ncRNA	12.84	18.28	6.32	1.24	3.17	10.05	2.19	-2.47136
chr3	170719997	170720497	intron (NM_001278659, intron 7 of 9)	intron (NM_001278659, intron 7 of 9)	24521	NM_001278658	6514	Hs.167584	NM_000340	ENSG00000163581	SLC2A2	GLUT2	solute carrier family 2 member 2	protein-coding	1.65	1.78	1.68	23.22	15.51	33.1	28.19	2.99241
chr7	47510114	47510614	intron (NM_022748, intron 4 of 30)	intron (NM_022748, intron 4 of 30)	111378	NM_022748	64759	Hs.520814	NM_022748	ENSG00000136205	TNS3	TEM6|TENS1	tensin 3	protein-coding	2.2	3.88	2.67	23.22	12.82	53.99	40.26	2.42852
chr20	22597682	22598182	Intergenic	Intergenic	-9777	NR_109883	101929685	Hs.563018	NR_109883	ENSG00000237396	LINC01384	-	long intergenic non-protein coding RNA 1384	ncRNA	2.93	2.91	4.44	60.34	35.77	19.49	42.76	3.09581
chr2	30440669	30441169	Intergenic	Intergenic	-13478	NM_030915	81606	Hs.567598	NM_030915	ENSG00000213626	LBH	-	limb bud and heart development	protein-coding	4.77	8.9	5.73	60.55	22.95	72.55	115.75	2.51365
chr6	138145244	138145744	non-coding (NR_049793, exon 4 of 4)	non-coding (NR_049793, exon 4 of 4)	-42831	NM_001270508	7128	Hs.211600	NM_006290	ENSG00000118503	TNFAIP3	A20|AISBL|OTUD7C|TNFA1P2	TNF alpha induced protein 3	protein-coding	5.14	33.81	5.63	1.45	1.58	12.53	6.11	-2.41357
chr11	27209479	27209979	intron (NR_125766, intron 2 of 4)	L2a|LINE|L2	30586	NR_125768	103695435	Hs.196133	NR_125766	ENSG00000254560	BBOX1-AS1	-	BBOX1 antisense RNA 1	ncRNA	1.47	1.29	2.47	16.59	20.89	10.52	7.52	2.46497
chr10	105631834	105632334	Intergenic	Intergenic	-16920	NM_014631	9644	Hs.678727	NM_014631	ENSG00000107957	SH3PXD2A	FISH|SH3MD1|TKS5	SH3 and PX domains 2A	protein-coding	17.79	28.8	5.53	3.32	2.22	7.73	7.52	-2.80826
chr12	105675370	105675870	Intergenic	MLT1L|LTR|ERVL-MaLR	45175	NR_131986	105369954	Hs.368938	NR_131986	ENSG00000257642	KCCAT198	-	renal clear cell carcinoma-associated transcript 198	ncRNA	0.73	0.97	1.09	5.18	8.39	13.61	23.5	3.7839
chr15	90572245	90572745	intron (NM_198526, intron 1 of 4)	intron (NM_198526, intron 1 of 4)	22508	NR_036135	100422841		NR_036135	ENSG00000265871	MIR3174	-	microRNA 3174	ncRNA	1.83	1.62	1.88	33.8	13.77	36.66	21.15	2.92623
chr3	139372383	139372883	intron (NM_001200047, intron 1 of 3)	intron (NM_001200047, intron 1 of 3)	24259	NM_001320511	349565	Hs.208673	NM_178177	ENSG00000163864	NMNAT3	FKSG76|PNAT-3|PNAT3	nicotinamide nucleotide adenylyltransferase 3	protein-coding	16.69	27.18	8.89	8.09	2.37	18.25	2.51	-2.58302
chr1	225896756	225897256	Intergenic	Intergenic	-56161	NM_018212	55740	Hs.497893	NM_018212	ENSG00000154380	ENAH	ENA|MENA|NDPP1	enabled homolog (Drosophila)	protein-coding	10.09	18.28	6.81	1.66	2.85	4.49	4.86	-2.7184
chr3	101899432	101899932	Intergenic	Intergenic	17133	NR_135549	101929411	Hs.506540	NR_135549		LOC101929411	-	uncharacterized LOC101929411	ncRNA	2.2	0.81	1.19	24.05	24.21	5.1	5.64	2.78149
chr17	55491245	55491745	intron (NM_170721, intron 5 of 9)	intron (NM_170721, intron 5 of 9)	109463	NR_110808	101927557	Hs.639984	NR_110808	ENSG00000266100	LOC101927557	-	uncharacterized LOC101927557	ncRNA	2.02	4.04	2.67	91.03	8.07	56.93	17.86	3.30997
chr12	68104309	68104809	intron (NR_110063, intron 4 of 4)	intron (NR_110063, intron 4 of 4)	18696	NR_110063	101927901	Hs.369609	NR_110063	ENSG00000255970	LOC101927901	-	uncharacterized LOC101927901	ncRNA	3.3	4.37	2.57	29.65	10.6	77.96	45.89	2.88279
chr3	30330708	30331208	Intergenic	Intergenic	-317036	NM_001024847	7048	Hs.82028	NM_003242	ENSG00000163513	TGFBR2	AAT3|FAA3|LDS1B|LDS2|LDS2B|MFS2|RIIC|TAAD2|TGFR-2|TGFbeta-RII	transforming growth factor beta receptor 2	protein-coding	1.83	0.97	0.99	14.51	12.82	7.27	15.82	2.47933
chr8	11671367	11671867	intron (NM_001287747, intron 3 of 7)	intron (NM_001287747, intron 3 of 7)	4964	NM_001287751	2222	Hs.593928	NM_004462	ENSG00000079459	FDFT1	DGPT|ERG9|SQS|SS	farnesyl-diphosphate farnesyltransferase 1	protein-coding	1.65	1.78	1.88	61.17	4.43	9.44	8.93	2.42545
chr1	165615078	165615578	intron (NM_004528, intron 1 of 5)	intron (NM_004528, intron 1 of 5)	15218	NM_004528	4259	Hs.191734	NM_004528	ENSG00000143198	MGST3	GST-III	microsomal glutathione S-transferase 3	protein-coding	2.2	4.04	2.17	120.47	30.39	72.7	60.3	3.98
chr12	38518136	38518636	Intergenic	HERVK11D-int|LTR|ERVK	-192171	NM_001308340	144245	Hs.259305	NM_001013620	ENSG00000175548	ALG10B	ALG10|KCR1	ALG10B, alpha-1,2-glucosyltransferase	protein-coding	1.47	2.27	0.69	21.98	12.34	14.54	33.21	3.05813
chr4	149716221	149716721	Intergenic	Intergenic	147059	NR_134681	105377480	Hs.148699	NR_134681	ENSG00000249317	LOC105377480	-	uncharacterized LOC105377480	ncRNA	2.38	3.4	4.84	25.5	19.47	13.61	53.57	2.39301
chr8	29140470	29140970	Intergenic	Intergenic	-20110	NM_015254	23303	Hs.444767	NM_015254	ENSG00000197892	KIF13B	GAKIN	kinesin family member 13B	protein-coding	2.38	4.85	2.27	129.18	12.03	33.41	31.8	3.45677
chr21	16512777	16513277	Intergenic	Intergenic	-75901	NM_003489	8204	Hs.155017	NM_003489	ENSG00000180530	NRIP1	RIP140	nuclear receptor interacting protein 1	protein-coding	4.95	1.78	3.16	36.49	27.22	49.65	36.97	2.80605
chr8	102161762	102162262	Intergenic	Intergenic	55948	NM_001042510	51123	Hs.374485	NM_016096	ENSG00000120963	ZNF706	HSPC038|PNAS-106|PNAS-113	zinc finger protein 706	protein-coding	0.92	1.78	2.27	21.15	12.34	27.53	15.04	2.50117
chrX	120524107	120524607	Intergenic	Intergenic	19531	NR_037444	100500869		NR_037444	ENSG00000265456	MIR3672	-	microRNA 3672	ncRNA	1.47	0.97	1.48	7.67	3.01	7.89	30.7	2.63562
chr3	176853794	176854294	intron (NM_001321194, intron 1 of 16)	intron (NM_001321194, intron 1 of 16)	60228	NM_001321193	79718	Hs.714201	NM_024665	ENSG00000177565	TBL1XR1	C21|DC42|IRA1|MRD41|TBLR1	transducin beta like 1 X-linked receptor 1	protein-coding	1.83	1.29	1.09	8.92	7.12	28	5.01	2.65852
chr1	210430944	210431444	Intergenic	Intergenic	-23728	NR_024337	574036	Hs.446946	NR_024337	ENSG00000203706	SERTAD4-AS1	C1orf133	SERTAD4 antisense RNA 1	ncRNA	19.44	42.55	10.37	8.29	4.91	12.84	5.01	-3.2674
chr19	40449832	40450332	Intergenic	MER84-int|LTR|ERV1	-9549	NM_003890	8857	Hs.111732	NM_003890	ENSG00000275395	FCGBP	FC(GAMMA)BP	Fc fragment of IgG binding protein	protein-coding	2.57	2.1	0.89	16.59	10.76	46.25	27.1	2.40812
chr21	18834668	18835168	Intergenic	Intergenic	23710	NR_037585	100505929	Hs.46707	NM_001005521	ENSG00000232560	LINC01549	C21orf37	long intergenic non-protein coding RNA 1549	ncRNA	3.67	0.81	1.48	26.33	27.22	18.1	20.21	2.84768
chr18	3305250	3305750	Intergenic	Tigger3c|DNA|TcMar-Tigger	42783	NM_001144945	103910	Hs.190086	NM_033546	ENSG00000118680	MYL12B	MLC-B|MRLC2	myosin light chain 12B	protein-coding	10.64	34.3	6.32	1.45	0.95	2.32	9.55	-3.07768
chr1	17786738	17787238	Intergenic	Intergenic	-20738	NM_018715	55920	Hs.380857	NM_018715	ENSG00000179051	RCC2	TD-60	regulator of chromosome condensation 2	protein-coding	14.67	26.05	6.22	2.7	2.85	16.4	0.94	-2.54662
chr4	62751853	62752353	intron (NM_015236, intron 8 of 24)	intron (NM_015236, intron 8 of 24)	275380	NR_110595	101927186	Hs.723269	NR_110595		ADGRL3-AS1	LPHN3-AS1	adhesion G protein-coupled receptor L3 antisense RNA 1	ncRNA	0.37	0.49	0.99	14.72	8.55	6.5	10.49	3.42873
chr3	36961200	36961700	intron (NM_001329998, intron 1 of 23)	intron (NM_001329998, intron 1 of 23)	25098	NM_001329998	9881	Hs.170999	NM_014831	ENSG00000168016	TRANK1	LBA1	tetratricopeptide repeat and ankyrin repeat containing 1	protein-coding	1.83	1.62	0.99	32.35	9.5	9.28	13.47	2.61659
chr2	131774673	131775173	intron (NM_015320, intron 4 of 13)	intron (NM_015320, intron 4 of 13)	75608	NM_001321748	130074	Hs.534679	NM_001009993	ENSG00000152102	FAM168B	MANI	family with sequence similarity 168 member B	protein-coding	6.05	17.8	5.93	3.32	2.37	9.9	1.25	-2.40522
chr15	27694126	27694626	intron (NM_033223, intron 5 of 9)	intron (NM_033223, intron 5 of 9)	-287910	NR_120343	101928869	Hs.585699	NR_120343	ENSG00000228740	GABRG3-AS1	-	GABRG3 antisense RNA 1	ncRNA	13.76	20.39	5.23	0.62	2.22	4.02	1.88	-3.43818
chr14	56298707	56299207	Intergenic	Intergenic	-35565	NR_026797	645687	Hs.569345	NR_026796		LINC00520	C14orf34	long intergenic non-protein coding RNA 520	ncRNA	2.93	1.62	2.37	19.28	17.73	19.95	36.18	2.36671
chr2	20371942	20372442	Intergenic	Intergenic	52735	NM_002997	6382	Hs.224607	NM_002997	ENSG00000115884	SDC1	CD138|SDC|SYND1|syndecan	syndecan 1	protein-coding	15.59	32.03	6.91	1.66	3.64	18.72	5.33	-2.33805
chr11	23380784	23381284	Intergenic	Intergenic	59702	NR_107021	102465860		NR_107021	ENSG00000275868	MIR8054	hsa-mir-8054	microRNA 8054	ncRNA	1.28	0.32	1.19	8.09	3.01	20.73	4.7	2.385
chr6	52195250	52195750	Intergenic	L2c|LINE|L2	-31426	NM_133367	85315	Hs.239388	NM_133367	ENSG00000170915	PAQR8	C6orf33|LMPB1|MPRB	progestin and adipoQ receptor family member 8	protein-coding	3.49	5.5	1.68	21.98	28.96	15.78	41.98	2.46712
chr8	62763272	62763772	Intergenic	L1PA3|LINE|L1	136175	NR_039680	100616484		NR_039680	ENSG00000264408	MIR4470	mir-4470	microRNA 4470	ncRNA	1.1	3.4	3.06	16.59	15.19	22.12	48.09	2.38993
chr1	88777565	88778065	Intergenic	Intergenic	-372012	NM_001320709	5586	Hs.440833	NM_006256	ENSG00000065243	PKN2	PAK2|PRK2|PRKCL2|PRO2042|Pak-2|STK7	protein kinase N2	protein-coding	1.1	1.29	1.88	13.89	8.55	11.91	27.88	2.98184
chr12	32101636	32102136	Intergenic	MER11A|LTR|ERVK	-10467	NM_018169	55196	Hs.445129	NM_018169	ENSG00000174718	KIAA1551	C12orf35|UTA2-1	KIAA1551	protein-coding	1.28	1.78	1.28	12.23	12.5	15.62	8.3	2.57912
chr11	76806719	76807219	intron (NM_004055, intron 3 of 12)	intron (NM_004055, intron 3 of 12)	-6917	NM_006189	4975	Hs.673853	NM_006189	ENSG00000254550	OMP	-	olfactory marker protein	protein-coding	4.59	7.12	6.02	116.12	9.81	121.43	51.53	2.7128
chr1	171993561	171994061	intron (NM_015569, intron 4 of 20)	L1P3|LINE|L1	-114137	NR_036066	100422882		NR_036066	ENSG00000283152	MIR3120	mir-3120	microRNA 3120	ncRNA	18.53	23.14	8.2	6.22	2.22	15.31	3.76	-2.58886
chr8	106861785	106862285	intron (NR_125796, intron 2 of 7)	L1PB1|LINE|L1	210696	NR_125797	102723356	Hs.571413	NR_125796		ZFPM2-AS1	-	ZFPM2 antisense RNA 1	ncRNA	28.62	38.51	10.57	17	4.59	2.78	6.89	-2.42383
chr4	147196442	147196942	intron (NM_001029998, intron 10 of 11)	MIRb|SINE|MIR	99857	NM_007080	11157	Hs.190520	NM_007080	ENSG00000164167	LSM6	YDR378C	LSM6 homolog, U6 small nuclear RNA and mRNA degradation associated	protein-coding	0.92	1.78	2.27	13.48	6.49	4.02	30.86	2.37395
chr6	73497202	73497702	intron (NM_001160133, intron 1 of 14)	intron (NM_001160133, intron 1 of 14)	157229	NR_120503	100507381	Hs.662412	NR_120503	ENSG00000233844	KCNQ5-IT1	-	KCNQ5 intronic transcript 1	ncRNA	18.71	38.34	5.53	0.21	1.58	0.77	2.19	-4.43793
chr2	134946597	134947097	Intergenic	MER21C|LTR|ERVL	62151	NR_037450	100500878		NR_037450	ENSG00000263813	MIR3679	mir-3679	microRNA 3679	ncRNA	8.8	5.02	3.56	60.34	37.19	57.23	25.53	2.35466
chrX	64415431	64415931	Intergenic	LTR22B|LTR|ERVK	-161057	NM_001243804	55906	Hs.28249	NM_018684	ENSG00000126970	ZC4H2	HCA127|KIAA1166|WRWF|WWS	zinc finger C4H2-type containing	protein-coding	1.1	1.13	0.79	19.08	13.93	22.43	8.93	3.52182
chr7	142640883	142641383	intron (NM_000420, intron 13 of 18)	intron (NM_000420, intron 13 of 18)	4530	NM_178829	135927	Hs.239676	NM_178829	ENSG00000165131	C7orf34	ctm-1	chromosome 7 open reading frame 34	protein-coding	20.36	38.02	11.36	2.9	5.06	4.95	3.6	-3.3785
chr17	5487666	5488166	promoter-TSS (NM_033007)	promoter-TSS (NM_033007)	-84	NM_033007	22861	Hs.652273	NM_014922	ENSG00000091592	NLRP1	CARD7|CIDED|CLR17.1|DEFCAP|DEFCAP-L/S|NAC|NALP1|PP1044|SLEV1|VAMAS1	NLR family pyrin domain containing 1	protein-coding	30.63	74.58	11.16	9.75	1.58	15.62	8.93	-3.34733
chr14	95354359	95354859	Intergenic	Intergenic	117630	NR_144432	108868751		NR_144432		DIGIT	-	divergent to GSC, Induced by TGF-b family signaling	ncRNA	1.1	3.72	2.57	51.01	8.39	36.2	6.27	2.70241
chr1	192708563	192709063	Intergenic	MER51A|LTR|ERV1	23355	NR_039624	100616345		NR_039624		MIR4426	-	microRNA 4426	ncRNA	1.65	1.13	1.58	55.78	19.78	43.93	40.72	3.87934
chr6	43894520	43895020	intron (NR_024478, intron 1 of 1)	intron (NR_024478, intron 1 of 1)	36005	NR_024478	100132354	Hs.376232	NR_024478		LINC01512	HI-LNC77	long intergenic non-protein coding RNA 1512	ncRNA	2.93	6.31	3.16	58.68	29.44	148.04	24.9	2.6386
chr8	1879943	1880443	intron (NM_001308153, intron 26 of 29)	intron (NM_001308153, intron 26 of 29)	-39370	NR_126346	104266957	Hs.734498	NR_126346	ENSG00000253696	KBTBD11-OT1	-	KBTBD11 overlapping transcript 1	ncRNA	2.75	2.91	3.56	14.93	26.43	72.7	14.1	2.6409
chr7	90558119	90558619	intron (NM_001287137, intron 6 of 12)	L1P2|LINE|L1	219239	NM_001287136	5218	Hs.258576	NM_012395	ENSG00000058091	CDK14	PFTAIRE1|PFTK1	cyclin dependent kinase 14	protein-coding	2.93	3.07	4.64	193.67	3.32	17.63	8.93	3.12188
chr10	98021611	98022111	intron (NR_047683, intron 1 of 13)	intron (NR_047683, intron 1 of 13)	9412	NR_047681	29760	Hs.665244	NM_013314	ENSG00000095585	BLNK	AGM4|BASH|BLNK-S|LY57|SLP-65|SLP65|bca	B-cell linker	protein-coding	2.02	1.29	1.19	17	7.91	22.89	28.66	2.70826
chr7	25236064	25236564	Intergenic	LTR19B|LTR|ERV1	-16497	NM_138811	136895	Hs.122055	NM_138811	ENSG00000153790	C7orf31	-	chromosome 7 open reading frame 31	protein-coding	1.65	0.65	1.28	16.38	12.19	14.39	28.82	3.16412
chr12	57326572	57327072	intron (NM_148897, intron 1 of 3)	intron (NM_148897, intron 1 of 3)	1367	NM_148897	121214	Hs.380178	NM_148897	ENSG00000170426	SDR9C7	RDHS|SDR-O|SDRO	short chain dehydrogenase/reductase family 9C member 7	protein-coding	10.27	17.47	7.9	4.35	1.9	8.35	2.19	-2.33253
chr3	72677135	72677635	Intergenic	Intergenic	36015	NR_135531	105377162	Hs.123457	NR_135531		LOC105377162	-	uncharacterized LOC105377162	ncRNA	15.96	31.23	8.99	1.66	3.32	13.92	3.45	-2.74826
chr1	55894771	55895271	Intergenic	Intergenic	203707	NR_039618	100616272		NR_039618	ENSG00000265822	MIR4422	mir-4422	microRNA 4422	ncRNA	2.38	7.6	4.94	39.81	29.75	36.2	127.97	2.79009
chr3	110462012	110462512	Intergenic	Intergenic	326544	NR_045114	100506555	Hs.535689	NR_045114		PVRL3-AS1	-	PVRL3 antisense RNA 1	ncRNA	1.65	0.32	0.79	9.33	20.89	16.4	10.81	3.04517
chr12	80384269	80384769	Intergenic	MER51A|LTR|ERV1	-55284	NM_001244990	4659	Hs.49582	NM_002480	ENSG00000058272	PPP1R12A	M130|MBS|MYPT1	protein phosphatase 1 regulatory subunit 12A	protein-coding	2.93	2.43	2.96	40.02	1.58	36.66	11.28	2.3818
chr15	68305222	68305722	Intergenic	Intergenic	-41045	NM_016166	8554	Hs.162458	NM_016166	ENSG00000033800	PIAS1	DDXBP1|GBP|GU/RH-II|ZMIZ3	protein inhibitor of activated STAT 1	protein-coding	2.57	2.27	2.77	9.54	15.19	15.16	36.03	2.50351
chr8	134781087	134781587	Intergenic	Intergenic	8258	NR_125422	101927798	Hs.615036	NR_125422	ENSG00000253165	LOC101927798	-	uncharacterized LOC101927798	ncRNA	17.61	45.3	7.01	2.28	4.91	0.46	3.45	-3.69811
chr5	41182731	41183231	intron (NM_000065, intron 6 of 17)	intron (NM_000065, intron 6 of 17)	30714	NM_000065	729	Hs.481992	NM_000065	ENSG00000039537	C6	-	complement C6	protein-coding	2.2	0.81	1.68	43.54	25.8	24.29	12.84	3.43786
chr6	142721560	142722060	intron (NM_001032394, intron 10 of 24)	intron (NM_001032394, intron 10 of 24)	98754	NM_001032395	57211	Hs.743302	NM_020455	ENSG00000112414	ADGRG6	APG1|DREG|GPR126|LCCS9|PR126|PS1TP2|VIGR	adhesion G protein-coupled receptor G6	protein-coding	1.47	1.29	1.78	16.17	9.5	6.34	14.25	2.35873
chr4	38134710	38135210	intron (NM_001253915, intron 3 of 3)	intron (NM_001253915, intron 3 of 3)	13385	NM_001253915	23216	Hs.176503	NM_015173	ENSG00000065882	TBC1D1	TBC|TBC1	TBC1 domain family member 1	protein-coding	2.02	0.32	0.79	22.39	10.92	17.63	9.08	2.79716
chr8	128872071	128872571	intron (NR_003367, intron 1 of 8)	intron (NR_003367, intron 1 of 8)	64113	NR_031609	100302185		NR_031609	ENSG00000249859	MIR1204	hsa-mir-1204	microRNA 1204	ncRNA	18.16	61.64	11.65	2.9	3.48	11.45	5.33	-3.32501
chr20	51693947	51694447	intron (NM_173485, intron 1 of 2)	L2c|LINE|L2	105251	NM_173485	128553	Hs.473117	NM_173485	ENSG00000182463	TSHZ2	C20orf17|OVC10-2|TSH2|ZABC2|ZNF218	teashirt zinc finger homeobox 2	protein-coding	4.77	4.04	4.35	22.81	22	140.3	19.11	2.35445
chr20	22392109	22392609	intron (NR_027089, intron 1 of 3)	intron (NR_027089, intron 1 of 3)	8922	NR_027090	284788	Hs.651993	NR_027089	ENSG00000204684	LOC284788	-	uncharacterized LOC284788	ncRNA	2.57	4.04	1.88	32.97	29.12	16.09	23.5	2.57605
chr3	74040112	74040612	Intergenic	L1PA4|LINE|L1	-366290	NM_015009	23024	Hs.660347	NM_015009	ENSG00000121440	PDZRN3	LNX3|SEMACAP3|SEMCAP3	PDZ domain containing ring finger 3	protein-coding	0.73	1.94	1.09	32.35	3.01	7.27	3.29	2.42527
chr20	43062809	43063309	Intergenic	Intergenic	16138	NR_109893	101927242	Hs.143307	NR_109893	ENSG00000168746	LINC01430	-	long intergenic non-protein coding RNA 1430	ncRNA	2.02	2.27	2.57	29.24	9.18	98.38	14.72	2.47875
chr11	77801463	77801963	Intergenic	LTR22C|LTR|ERVK	-10448	NM_004549	4718	Hs.407860	NM_004549	ENSG00000151366	NDUFC2	B14.5b|CI-B14.5b|HLC-1|NADHDH2	NADH:ubiquinone oxidoreductase subunit C2	protein-coding	2.02	2.59	0.79	26.54	13.45	21.97	20.21	2.66992
chr5	133354192	133354692	Intergenic	MER77B|LTR|ERVL	-13618	NM_003374	7416	Hs.519320	NM_003374	ENSG00000213585	VDAC1	PORIN|VDAC-1	voltage dependent anion channel 1	protein-coding	7.15	2.91	3.65	95.38	28.8	59.55	31.48	2.37656
chr9	79502216	79502716	intron (NM_001308047, intron 1 of 17)	MLT1I|LTR|ERVL-MaLR	18537	NM_015225	158471	Hs.262857	NM_015225	ENSG00000106772	PRUNE2	BMCC1|BNIPXL|C9orf65|KIAA0367	prune homolog 2	protein-coding	1.83	2.59	1.68	23.22	2.06	78.27	2.04	2.47346
chr14	25510564	25511064	intron (NM_001304476, intron 1 of 6)	intron (NM_001304476, intron 1 of 6)	7392	NM_001304477	29091	Hs.508958	NM_014178	ENSG00000168952	STXBP6	HSPC156|amisyn	syntaxin binding protein 6	protein-coding	2.93	1.94	1.38	20.74	7.6	24.29	28.35	2.48486
chr4	70105452	70105952	Intergenic	MER61E|LTR|ERV1	-25253	NM_001073	10720	Hs.339811	NM_001073	ENSG00000213759	UGT2B11	-	UDP glucuronosyltransferase family 2 member B11	protein-coding	3.49	1.62	2.67	26.75	17.88	26.3	17.39	2.56048
chr4	60463640	60464140	Intergenic	L1MA6|LINE|L1	584599	NR_133942	105377247	Hs.298228	NR_133941	ENSG00000251266	LOC105377247	-	uncharacterized LOC105377247	ncRNA	1.65	3.56	2.07	72.37	2.37	2.32	2.66	2.4722
chr17	41496133	41496633	Intergenic	Intergenic	20030	NM_001661	379	Hs.183153	NM_001661	ENSG00000175906	ARL4D	ARF4L|ARL6	ADP ribosylation factor like GTPase 4D	protein-coding	11.01	20.87	6.91	1.45	2.37	10.98	0.94	-3.25421
chr3	151739704	151740204	Intergenic	L1M1|LINE|L1	-93991	NR_110202	101928142	Hs.680207	NR_110202		AADACL2-AS1	-	AADACL2 antisense RNA 1	ncRNA	12.66	40.12	9.68	2.7	3.96	5.26	4.23	-2.97956
chr9	140045025	140045525	intron (NM_000832, intron 4 of 18)	intron (NM_000832, intron 4 of 18)	11666	NM_001185091	2902	Hs.558334	NM_000832	ENSG00000176884	GRIN1	GluN1|MRD8|NMD-R1|NMDA1|NMDAR1|NR1	glutamate ionotropic receptor NMDA type subunit 1	protein-coding	2.75	2.75	1.98	53.08	7.6	71.31	16.45	2.42408
chr9	74769469	74769969	intron (NM_004293, intron 1 of 13)	intron (NM_004293, intron 1 of 13)	5452	NM_004293	9615	Hs.494163	NM_004293	ENSG00000119125	GDA	CYPIN|GUANASE|NEDASIN	guanine deaminase	protein-coding	1.1	3.72	2.37	29.24	11.24	65.28	8.77	2.80327
chr9	114111085	114111585	Intergenic	LTR44|LTR|ERV1	-20622	NM_205859	26248	Hs.381312	NM_205859	ENSG00000171133	OR2K2	HSHTPCRH06|HTPCRH06|OR2AN1P|OR2AR1P	olfactory receptor family 2 subfamily K member 2	protein-coding	1.65	1.78	0.99	28.41	19.78	31.09	28.66	3.51284
chr12	54372656	54373156	Intergenic	Intergenic	-4166	NR_047517	100124700	Hs.197076	NR_003716	ENSG00000228630	HOTAIR	HOXAS|HOXC-AS4|HOXC11-AS1|NCRNA00072	HOX transcript antisense RNA	ncRNA	2.75	3.4	1.48	19.08	12.66	37.74	42.6	2.8984
chr7	98013384	98013884	intron (NM_018842, intron 1 of 13)	intron (NM_018842, intron 1 of 13)	16793	NM_018842	55971	Hs.656063	NM_018842	ENSG00000006453	BAIAP2L1	IRTKS	BAI1 associated protein 2 like 1	protein-coding	1.65	0.81	0.99	98.7	14.88	14.23	31.17	3.1556
chrX	63359846	63360346	Intergenic	Intergenic	65528	NM_152424	139285	Hs.314225	NM_152424	ENSG00000184675	AMER1	FAM123B|OSCS|WTX	APC membrane recruitment protein 1	protein-coding	0.92	2.59	1.09	10.58	8.39	7.12	15.51	2.36558
chr7	20259437	20259937	intron (NR_134569, intron 3 of 3)	MLT1N2|LTR|ERVL-MaLR	2487	NR_134569	100506098	Hs.59203	NR_134567	ENSG00000233834	LOC100506098	-	uncharacterized LOC100506098	ncRNA	7.34	11.33	4.35	82.32	29.12	91.11	66.88	2.47291
chr7	21050691	21051191	intron (NR_126381, intron 2 of 4)	intron (NR_126381, intron 2 of 4)	175891	NR_126381	104355138	Hs.650722	NR_126381	ENSG00000232790	LINC01162	-	long intergenic non-protein coding RNA 1162	ncRNA	7.52	17.31	4.94	2.28	0.95	6.03	1.57	-2.864
chr15	69896276	69896776	intron (NR_126438, intron 1 of 3)	intron (NR_126438, intron 1 of 3)	11987	NR_126437	104472713	Hs.430824	NR_126437	ENSG00000259641	PCAT29	-	prostate cancer associated transcript 29 (non-protein coding)	ncRNA	1.1	1.78	1.98	9.95	8.7	30.94	17.54	2.87142
chr12	98894633	98895133	intron (NR_038383, intron 2 of 3)	intron (NR_038383, intron 2 of 3)	2750	NR_038383	643770	Hs.129589	NR_038383	ENSG00000245017	LOC643770	-	uncharacterized LOC643770	ncRNA	2.2	2.27	3.36	23.43	21.37	31.71	21.77	2.54516
chr3	29106911	29107411	Intergenic	Intergenic	215269	NR_109804	100873979	Hs.99391	NR_109804		RBMS3-AS3	-	RBMS3 antisense RNA 3	ncRNA	13.02	32.2	3.56	1.24	2.06	4.64	4.86	-3.34065
chr4	161747452	161747952	Intergenic	LTR10F|LTR|ERV1	-1196183	NR_125888	101928052	Hs.647993	NR_125888	ENSG00000249419	LOC101928052	-	uncharacterized LOC101928052	ncRNA	2.2	1.46	1.88	36.08	1.27	0.62	49.5	2.67308
chr4	93155554	93156054	Intergenic	L1ME5|LINE|L1	42649	NR_125920	101929194	Hs.626389	NR_125920		LNCPRESS2	-	lncRNA p53 regulated and ESC associated 2	ncRNA	2.75	3.24	1.28	17.21	11.08	17.63	17.39	2.52446
chr11	60764205	60764705	intron (NM_001254751, intron 1 of 10)	MIRb|SINE|MIR	25342	NM_001254750	923	Hs.744366	NM_006725	ENSG00000013725	CD6	TP120	CD6 molecule	protein-coding	2.02	1.29	1.98	16.8	12.03	29.08	3.6	2.56205
chr1	232817929	232818429	Intergenic	Intergenic	60282	NR_110683	101927683	Hs.520568	NR_110683	ENSG00000236497	LINC01744	-	long intergenic non-protein coding RNA 1744	ncRNA	0.92	1.78	1.78	14.51	10.6	18.56	38.69	3.69057
chr8	11657712	11658212	intron (NM_001287744, intron 1 of 7)	LTR10C|LTR|ERV1	-2158	NM_004462	2222	Hs.593928	NM_004462	ENSG00000079459	FDFT1	DGPT|ERG9|SQS|SS	farnesyl-diphosphate farnesyltransferase 1	protein-coding	8.07	8.74	1.68	138.93	17.09	30.94	32.58	2.68563
chr4	86791746	86792246	intron (NM_001287805, intron 1 of 7)	intron (NM_001287805, intron 1 of 7)	42950	NM_001287805	83478	Hs.444229	NM_031305	ENSG00000138639	ARHGAP24	FILGAP|RC-GAP72|RCGAP72|p73|p73RhoGAP	Rho GTPase activating protein 24	protein-coding	0.73	2.91	0.89	16.38	12.5	8.82	25.22	2.84666
chr2	187119432	187119932	Intergenic	MIR|SINE|MIR	-168638	NR_110218	101927217	Hs.130011	NR_110218	ENSG00000237877	LINC01473	-	long intergenic non-protein coding RNA 1473	ncRNA	0.73	1.13	0.89	9.95	4.43	1.86	17.7	2.75075
chr3	101472333	101472833	intron (NM_024548, intron 6 of 10)	L1PA3|LINE|L1	-25446	NM_145037	91775	Hs.595933	NM_145037	ENSG00000144815	NXPE3	FAM55C|MST115|MSTP115	neurexophilin and PC-esterase domain family member 3	protein-coding	2.02	3.56	1.88	58.06	17.41	7.73	8.3	3.32281
chr1	43514259	43514759	Intergenic	Intergenic	-89662	NM_006516	6513	Hs.473721	NM_006516	ENSG00000117394	SLC2A1	CSE|DYT17|DYT18|DYT9|EIG12|GLUT|GLUT-1|GLUT1|GLUT1DS|HTLVR|PED|SDCHCN	solute carrier family 2 member 1	protein-coding	14.12	31.39	8.59	0.62	3.01	3.09	2.98	-3.83952
chr2	47306142	47306642	Intergenic	L1MC4|LINE|L1	76125	NM_173649	285051	Hs.531575	NM_173649	ENSG00000239605	C2orf61	-	chromosome 2 open reading frame 61	protein-coding	4.4	1.62	2.57	47.9	15.51	27.07	17.54	2.5725
chr17	35213313	35213813	Intergenic	Tigger3c|DNA|TcMar-Tigger	80397	NR_135669	102723471	Hs.567930	NR_135668	ENSG00000277268	LOC102723471	-	uncharacterized LOC102723471	ncRNA	2.38	3.72	2.37	17	9.02	23.05	54.98	2.48536
chr2	43232569	43233069	Intergenic	Intergenic	33863	NR_110585	102723854	Hs.570165	NR_110585	ENSG00000231826	LINC01819	-	long intergenic non-protein coding RNA 1819	ncRNA	4.22	6.63	4.15	151.16	41.78	149.43	50.75	3.3137
chr13	44953935	44954435	intron (NM_001010897, intron 2 of 2)	intron (NM_001010897, intron 2 of 2)	6207	NM_001010897	387923	Hs.377972	NM_001010897	ENSG00000151778	SERP2	C13orf21|bA269C23.1	stress associated endoplasmic reticulum protein family member 2	protein-coding	1.65	1.62	1.58	21.15	6.33	11.45	29.92	2.44501
chr5	7879152	7879652	intron (NR_134482, intron 4 of 13)	intron (NR_134482, intron 4 of 13)	10185	NR_134481	4552	Hs.481551	NM_002454	ENSG00000124275	MTRR	MSR|cblE	5-methyltetrahydrofolate-homocysteine methyltransferase reductase	protein-coding	2.38	0.65	1.58	33.8	5.86	53.52	9.08	2.94455
chr20	51697804	51698304	intron (NM_173485, intron 1 of 2)	Tigger9b|DNA|TcMar-Tigger	-103768	NM_001193421	128553	Hs.473117	NM_173485	ENSG00000182463	TSHZ2	C20orf17|OVC10-2|TSH2|ZABC2|ZNF218	teashirt zinc finger homeobox 2	protein-coding	2.38	3.72	4.15	10.16	18.99	165.36	31.64	2.64575
chr10	14596040	14596540	intron (NM_001282695, intron 2 of 5)	intron (NM_001282695, intron 2 of 5)	1889	NM_001320738	83641	Hs.446315	NM_031453	ENSG00000065809	FAM107B	C10orf45|HITS	family with sequence similarity 107 member B	protein-coding	2.75	5.66	2.96	24.26	29.28	35.42	35.4	2.33644
chr9	71354626	71355126	intron (NM_001278253, intron 1 of 13)	intron (NM_001278253, intron 1 of 13)	34546	NM_003558	8395	Hs.534371	NM_003558	ENSG00000107242	PIP5K1B	MSS4|STM7	phosphatidylinositol-4-phosphate 5-kinase type 1 beta	protein-coding	3.49	6.47	4.25	71.33	34.66	123.29	90.38	3.27276
chr21	45038720	45039220	intron (NM_007031, intron 6 of 8)	AluJb|SINE|Alu	-9100	NR_106718	102464825		NR_106718	ENSG00000278433	MIR6070	hsa-mir-6070	microRNA 6070	ncRNA	0.55	0.81	0.89	3.94	7.44	7.58	20.83	3.1362
chr16	69430515	69431015	Intergenic	Intergenic	-10874	NM_005652	7014	Hs.63335	NM_005652	ENSG00000132604	TERF2	TRBF2|TRF2	telomeric repeat binding factor 2	protein-coding	0.73	1.46	1.48	9.54	11.08	22.12	22.4	2.96106
chr5	535843	536343	promoter-TSS (NR_039661)	promoter-TSS (NR_039661)	-96	NR_039661	100616381		NR_039661	ENSG00000264233	MIR4456	-	microRNA 4456	ncRNA	2.75	4.53	2.86	68.84	3.48	63.11	2.19	2.32686
chr12	85834007	85834507	Intergenic	LTR40b|LTR|ERVL	160221	NM_006982	8092	Hs.41683	NM_006982	ENSG00000180318	ALX1	CART1|FND3|HEL23	ALX homeobox 1	protein-coding	2.02	2.43	0.79	13.89	13.93	5.72	9.71	2.57818
chr1	220295452	220295952	intron (NM_018060, intron 12 of 22)	intron (NM_018060, intron 12 of 22)	-4119	NR_029711	406969		NR_029711	ENSG00000207624	MIR194-1	MIRN194-1|mir-194-1	microRNA 194-1	ncRNA	1.83	0.16	1.28	9.75	14.09	13.92	23.5	2.78218
chr19	49133099	49133599	TTS (NM_001352)	TTS (NM_001352)	5140	NM_001204160	56848	Hs.528006	NM_020126	ENSG00000063176	SPHK2	SK 2|SK-2|SPK 2|SPK-2	sphingosine kinase 2	protein-coding	10.46	13.91	5.43	47.28	26.59	327.32	73.15	2.55193
chr5	99852871	99853371	Intergenic	L1PBa|LINE|L1	-17888	NM_198507	345757	Hs.356108	NM_198507	ENSG00000174132	FAM174A	HGS_RE408|NS5ATP6|TMEM157|UNQ1912	family with sequence similarity 174 member A	protein-coding	15.59	23.62	7.11	6.22	2.69	8.2	2.98	-2.79177
chr18	6203710	6204210	intron (NM_001330559, intron 12 of 18)	intron (NM_001330559, intron 12 of 18)	-52783	NR_110765	101927150		NR_110765		L3MBTL4-AS1	-	L3MBTL4 antisense RNA 1	ncRNA	20.18	25.24	8.1	2.28	2.53	13.3	3.92	-2.92411
chr8	11719979	11720479	intron (NM_147781, intron 1 of 10)	intron (NM_147781, intron 1 of 10)	5430	NM_147783	1508	Hs.520898	NM_001908	ENSG00000164733	CTSB	APPS|CPSB	cathepsin B	protein-coding	8.25	22.49	5.43	245.3	10.6	56.93	35.09	2.39436
chr7	41995387	41995887	Intergenic	Intergenic	-252931	NM_002192	3624	Hs.28792	NM_002192	ENSG00000122641	INHBA	EDF|FRP	inhibin beta A subunit	protein-coding	6.42	37.86	9.18	3.32	5.06	6.03	6.42	-2.39379
chr8	94594696	94595196	intron (NR_033858, intron 5 of 10)	MER113|DNA|hAT-Charlie	117715	NR_033858	642924	Hs.434882	NR_033858	ENSG00000246662	LINC00535	-	long intergenic non-protein coding RNA 535	ncRNA	2.75	1.62	1.48	6.64	15.83	9.59	18.01	2.35314
chr7	98048151	98048651	Intergenic	Intergenic	-17974	NM_018842	55971	Hs.656063	NM_018842	ENSG00000006453	BAIAP2L1	IRTKS	BAI1 associated protein 2 like 1	protein-coding	5.5	14.56	4.94	122.96	27.06	60.95	89.59	2.46363
chr15	94109992	94110492	Intergenic	Intergenic	-289547	NR_120321	101927153	Hs.371900	NR_120321		LOC101927153	-	uncharacterized LOC101927153	ncRNA	16.14	46.11	7.21	4.56	1.58	2.32	2.35	-4.12076
chr18	20069549	20070049	Intergenic	Intergenic	-71921	NM_172241	64693	Hs.406709	NM_022663	ENSG00000212710	CTAGE1	CT21.1|CT21.2|CTAGE|CTAGE-1|CTAGE-2	cutaneous T-cell lymphoma-associated antigen 1	protein-coding	1.28	3.56	1.98	29.44	9.5	15.31	11.28	2.5458
chr8	30114482	30114982	Intergenic	Intergenic	100919	NM_006571	10671	Hs.158427	NM_006571	ENSG00000104671	DCTN6	WS-3|WS3|p27	dynactin subunit 6	protein-coding	3.3	3.07	3.06	141.42	12.66	48.42	31.33	3.30371
chr9	34744843	34745343	Intergenic	Intergenic	-15558	NM_001141917	259308	Hs.522093	NM_001141917	ENSG00000205108	FAM205A	C9orf144B	family with sequence similarity 205 member A	protein-coding	12.84	21.19	7.21	2.7	3.64	6.19	1.88	-2.87944
chr2	10630842	10631342	Intergenic	L2c|LINE|L2	41238	NR_110597	101929715	Hs.634550	NR_110597		LOC101929715	-	uncharacterized LOC101929715	ncRNA	2.02	5.99	2.17	32.14	13.61	49.5	14.25	2.72633
chr9	110708643	110709143	Intergenic	Intergenic	-456892	NM_004235	9314	Hs.376206	NM_004235	ENSG00000136826	KLF4	EZF|GKLF	Kruppel like factor 4	protein-coding	1.28	2.59	0.59	17.21	15.51	6.03	18.01	2.9166
chr10	44174945	44175445	Intergenic	Intergenic	-30869	NM_001324166	7580	Hs.522885	NM_006973	ENSG00000169740	ZNF32	KOX30	zinc finger protein 32	protein-coding	14.86	25.56	5.63	4.15	3.48	2.48	5.17	-2.7525
chr2	69745958	69746458	TTS (NR_003705)	TTS (NR_003705)	1095	NR_003705	100124535	Hs.693447	NR_003705	ENSG00000207016	SNORA36C	-	small nucleolar RNA, H/ACA box 36C	snoRNA	13.39	24.59	7.21	2.07	3.96	5.1	1.88	-2.89745
chr3	4458535	4459035	intron (NM_182760, intron 6 of 8)	intron (NM_182760, intron 6 of 8)	50181	NM_001164674	285362	Hs.350475	NM_182760	ENSG00000144455	SUMF1	AAPA3037|FGE|UNQ3037	sulfatase modifying factor 1	protein-coding	9.54	26.05	6.22	2.28	1.42	1.08	4.23	-3.58172
chr20	49039634	49040134	Intergenic	Intergenic	-86974	NM_002827	5770	Hs.417549	NM_002827	ENSG00000196396	PTPN1	PTP1B	protein tyrosine phosphatase, non-receptor type 1	protein-coding	5.5	11.81	4.15	32.14	22	171.39	51.85	2.37259
chr4	53739291	53739791	3' UTR (NM_152540, exon 9 of 9)	3' UTR (NM_152540, exon 9 of 9)	11046	NM_023940	65997	Hs.8035	NM_023940	ENSG00000128045	RASL11B	-	RAS like family 11 member B	protein-coding	0.37	4.53	1.68	9.95	6.33	30.78	24.12	2.55308
chr15	42096516	42097016	intron (NR_049761, intron 3 of 29)	intron (NR_049761, intron 3 of 29)	-23517	NM_001114632	100137047	Hs.198161	NM_001114632	ENSG00000243789	JMJD7	-	jumonji domain containing 7	protein-coding	19.63	35.76	7.8	2.07	2.53	7.12	2.98	-3.67514
chr2	70008487	70008987	intron (NM_001320702, intron 2 of 12)	intron (NM_001320702, intron 2 of 12)	39631	NM_001320700	307	Hs.422986	NM_001153	ENSG00000196975	ANXA4	ANX4|HEL-S-274|P32.5|PAP-II|PIG28|PP4-X|ZAP36	annexin A4	protein-coding	2.57	2.75	0.2	25.3	15.67	23.05	22.56	2.65506
chr1	15092166	15092666	intron (NM_201628, intron 1 of 14)	intron (NM_201628, intron 1 of 14)	-158209	NM_001018000	23254	Hs.368823	NM_015209	ENSG00000189337	KAZN	KAZ	kazrin, periplakin interacting protein	protein-coding	10.09	23.14	8.89	2.7	3.01	9.28	3.29	-3.02998
chr9	95478106	95478606	intron (NM_015250, intron 6 of 7)	intron (NM_015250, intron 6 of 7)	-45809	NM_022755	64768	Hs.459896	NM_022755	ENSG00000127080	IPPK	C9orf12|INSP5K2|IP5K|IPK1|bA476B13.1	inositol-pentakisphosphate 2-kinase	protein-coding	26.78	53.55	10.96	4.98	3.96	17.79	12.53	-2.54002
chr10	1642968	1643468	intron (NM_018702, intron 1 of 9)	intron (NM_018702, intron 1 of 9)	74393	NR_033387	642394	Hs.568831	NM_001098830	ENSG00000205696	ADARB2-AS1	C10orf109|NCRNA00168|bA466B20.1	ADARB2 antisense RNA 1	ncRNA	17.43	44.49	5.33	1.87	3.64	3.4	3.13	-3.88596
chr12	27031551	27032051	Intergenic	Intergenic	-45670	NM_002223	3709	Hs.512235	NM_002223	ENSG00000123104	ITPR2	ANHD|CFAP48|INSP3R2|IP3R2	inositol 1,4,5-trisphosphate receptor type 2	protein-coding	10.82	38.18	8.3	2.7	3.32	10.36	4.7	-2.59169
chr17	72565594	72566094	Intergenic	Intergenic	-2362	NM_001324076	100130520		NM_001324073		LOC100130520	CD300H|CD300Hs	CD300c molecule-like	protein-coding	30.08	63.58	9.68	6.84	4.11	22.43	3.29	-2.83984
chr20	30877456	30877956	intron (NM_004798, intron 1 of 8)	MIRb|SINE|MIR	12252	NM_004798	9371	Hs.369670	NM_004798	ENSG00000101350	KIF3B	FLA8|HH0048|KLP-11	kinesin family member 3B	protein-coding	1.65	0.97	1.78	15.76	15.67	25.21	12.69	2.69847
chr4	22943598	22944098	Intergenic	LTR79|LTR|ERVL	228136	NM_001277225	57733	Hs.653107	NM_020973	ENSG00000249948	GBA3	CBG|CBGL1|GLUC|KLRP	glucosylceramidase beta 3 (gene/pseudogene)	protein-coding	2.38	3.07	2.17	20.74	15.83	9.59	27.1	2.47566
chr13	93404926	93405426	intron (NM_004466, intron 7 of 7)	L1PA3|LINE|L1	-31309	NR_046520	100873969	Hs.577863	NR_046520	ENSG00000235984	GPC5-AS1	-	GPC5 antisense RNA 1	ncRNA	1.1	3.24	1.38	24.68	2.53	8.66	31.64	2.54937
chr1	185381740	185382240	Intergenic	Intergenic	-77819	NR_038424	100288079	Hs.131220	NR_038424	ENSG00000261024	GS1-279B7.1	-	microtubule associated protein 1 light chain 3 beta pseudogene	pseudo	17.61	35.43	9.48	2.9	3.32	22.89	4.54	-2.4851
chr1	183962210	183962710	intron (NM_001303421, intron 1 of 11)	intron (NM_001303421, intron 1 of 11)	44444	NM_001303420	23127	Hs.387995	NM_015101	ENSG00000198756	COLGALT2	C1orf17|GLT25D2	collagen beta(1-O)galactosyltransferase 2	protein-coding	1.65	2.27	1.98	15.55	12.98	8.35	25.69	2.55557
chr6	167834749	167835249	Intergenic	CpG	-37001	NM_004610	6953	Hs.351	NM_004610	ENSG00000203690	TCP10	TCP10A	t-complex 10	protein-coding	3.12	5.82	4.25	54.95	14.88	91.11	39.32	2.54757
chr15	100762206	100762706	intron (NM_139057, intron 7 of 21)	intron (NM_139057, intron 7 of 21)	119754	NM_139057	170691	Hs.513200	NM_139057	ENSG00000140470	ADAMTS17	-	ADAM metallopeptidase with thrombospondin type 1 motif 17	protein-coding	12.11	42.39	8.69	2.7	2.85	16.55	2.51	-3.07713
chr11	57959568	57960068	TTS (NM_001005283)	TTS (NM_001005283)	1912	NM_001005283	219957	Hs.553643	NM_001005283	ENSG00000186513	OR9Q2	OR9Q2P	olfactory receptor family 9 subfamily Q member 2	protein-coding	2.57	1.94	1.78	27.58	14.09	20.26	9.08	2.38573
chr20	52268864	52269364	Intergenic	Intergenic	44221	NR_134576	105372672	Hs.259350	NR_134576	ENSG00000235415	LOC105372672	-	uncharacterized LOC105372672	ncRNA	1.83	0.81	1.09	4.15	5.06	53.37	5.95	2.45633
chr6	52193007	52193507	Intergenic	Intergenic	-33669	NM_133367	85315	Hs.239388	NM_133367	ENSG00000170915	PAQR8	C6orf33|LMPB1|MPRB	progestin and adipoQ receptor family member 8	protein-coding	3.67	2.91	2.77	17.83	28.17	14.7	48.56	2.55117
chr3	137707800	137708300	Intergenic	Intergenic	-9608	NM_001002026	51208	Hs.655324	NM_016369	ENSG00000066405	CLDN18	SFTA5|SFTPJ	claudin 18	protein-coding	2.57	2.43	5.83	42.72	41.15	15.16	46.36	2.85126
chr2	196409128	196409628	Intergenic	L2c|LINE|L2	-112154	NM_001127257	57181	Hs.650158	NM_020342	ENSG00000196950	SLC39A10	LZT-Hs2	solute carrier family 39 member 10	protein-coding	1.28	0.81	1.28	16.8	13.45	5.57	19.11	2.82194
chr15	72495699	72496199	intron (NM_001206799, intron 8 of 10)	intron (NM_001206799, intron 8 of 10)	-5813	NM_001012642	196996	Hs.596332	NM_001012642	ENSG00000175318	GRAMD2	-	GRAM domain containing 2	protein-coding	10.82	36.73	8.99	2.49	3.64	7.27	8.61	-2.53234
chr7	101372680	101373180	Intergenic	Intergenic	-86254	NM_001913	1523	Hs.191482	NM_001913	ENSG00000257923	CUX1	CASP|CDP|CDP/Cut|CDP1|COY1|CUTL1|CUX|Clox|Cux/CDP|GOLIM6|Nbla10317|p100|p110|p200|p75	cut like homeobox 1	protein-coding	3.3	5.34	2.96	108.24	13.14	41.46	39.94	3.29137
chr8	110620014	110620514	promoter-TSS (NM_001330596)	promoter-TSS (NM_001330596)	27	NM_001330596	55638	Hs.390738	NM_017786	ENSG00000147642	SYBU	GOLSYN|OCSYN|SNPHL	syntabulin	protein-coding	3.67	4.21	2.37	28.82	13.45	28.77	99.93	2.97218
chr6	152915796	152916296	intron (NM_182961, intron 3 of 145)	L2a|LINE|L2	41940	NM_033071	23345	Hs.12967	NM_015293	ENSG00000131018	SYNE1	8B|ARCA1|C6orf98|CPG2|EDMD4|MYNE1|Nesp1|SCAR8|dJ45H2.2	spectrin repeat containing nuclear envelope protein 1	protein-coding	1.28	2.1	2.37	6.22	21.52	1.55	33.83	2.67137
chr5	31707332	31707832	intron (NM_178140, intron 1 of 24)	MLT1B|LTR|ERVL-MaLR	68065	NM_178140	23037	Hs.481819	NM_015022	ENSG00000133401	PDZD2	AIPC|PAPIN|PDZK3|PIN1	PDZ domain containing 2	protein-coding	4.22	6.63	3.56	76.72	8.55	71.93	9.24	2.42148
chr20	52285550	52286050	Intergenic	Intergenic	60907	NR_134576	105372672	Hs.259350	NR_134576	ENSG00000235415	LOC105372672	-	uncharacterized LOC105372672	ncRNA	2.2	1.94	1.88	14.31	6.65	223.99	15.19	3.41743
chr20	10689434	10689934	Intergenic	Intergenic	-34990	NM_000214	182	Hs.224012	NM_000214	ENSG00000101384	JAG1	AGS|AGS1|AHD|AWS|CD339|HJ1|JAGL1	jagged 1	protein-coding	2.2	0.97	2.07	17.42	40.52	4.02	5.33	3.11461
chr7	73699108	73699608	Intergenic	Intergenic	-4447	NM_032421	7461	Hs.647018	NM_003388	ENSG00000106665	CLIP2	CLIP|CLIP-115|CYLN2|WBSCR3|WBSCR4|WSCR3|WSCR4	CAP-Gly domain containing linker protein 2	protein-coding	4.59	3.07	3.26	99.53	17.73	71.78	41.82	3.25625
chr11	76954290	76954790	intron (NM_182833, intron 12 of 15)	intron (NM_182833, intron 12 of 15)	43923	NM_182833	220032	Hs.249795	NM_182833	ENSG00000178795	GDPD4	GDE6	glycerophosphodiester phosphodiesterase domain containing 4	protein-coding	1.83	1.46	0.49	20.32	9.18	16.09	25.06	3.26915
chr13	32572217	32572717	Intergenic	Intergenic	-32970	NM_023037	10129	Hs.507669	NM_023037	ENSG00000073910	FRY	13CDNA73|214K23.2|C13orf14|CG003|bA207N4.2|bA37E23.1	FRY microtubule binding protein	protein-coding	1.1	1.13	2.57	12.86	16.78	8.66	13.47	2.70725
chr3	145416032	145416532	Intergenic	MLT1A0|LTR|ERVL-MaLR	463000	NM_000935	5352	Hs.477866	NM_000935	ENSG00000152952	PLOD2	BRKS2|LH2|TLH	procollagen-lysine,2-oxoglutarate 5-dioxygenase 2	protein-coding	10.09	20.22	7.31	3.32	3.96	1.08	5.33	-2.41448
chr2	228410745	228411245	intron (NM_004504, intron 10 of 12)	L1PA5|LINE|L1	74107	NM_001135189	3267	Hs.352962	NM_004504	ENSG00000173744	AGFG1	HRB|RAB|RIP	ArfGAP with FG repeats 1	protein-coding	2.38	3.07	2.27	52.05	5.06	28	39.94	2.70181
chr8	8127894	8128394	Intergenic	Intergenic	42052	NR_024363	286042	Hs.656318	NR_024361	ENSG00000173295	FAM86B3P	-	family with sequence similarity 86, member A pseudogene	pseudo	5.32	8.57	2.67	91.65	19.78	36.2	16.45	2.42289
chr8	87014899	87015399	Intergenic	MER44B|DNA|TcMar-Tigger	66777	NM_033126	85481	Hs.566854	NM_033126	ENSG00000147613	PSKH2	-	protein serine kinase H2	protein-coding	10.82	27.5	4.64	5.18	2.85	5.1	3.13	-2.35282
chr2	173205801	173206301	Intergenic	Intergenic	-86031	NM_001316306	3655	Hs.133397	NM_000210	ENSG00000091409	ITGA6	CD49f|ITGA6B|VLA-6	integrin subunit alpha 6	protein-coding	2.02	3.4	2.96	14.72	13.77	56.31	38.69	2.56093
chr2	14675222	14675722	Intergenic	Intergenic	-97335	NR_144632	151354	Hs.260855	NM_145175	ENSG00000162981	FAM84A	NSE1|PP11517	family with sequence similarity 84 member A	protein-coding	19.44	47.08	12.54	1.87	2.69	2.63	2.19	-4.15212
chr8	123029523	123030023	Intergenic	L1PBa1|LINE|L1	-376143	NM_005328	3037	Hs.159226	NM_005328	ENSG00000170961	HAS2	-	hyaluronan synthase 2	protein-coding	19.08	62.94	12.05	4.98	1.42	12.22	6.42	-3.3486
chr6	15133056	15133556	Intergenic	Intergenic	-112900	NM_004973	3720	Hs.269059	NM_004973	ENSG00000008083	JARID2	JMJ	jumonji and AT-rich interaction domain containing 2	protein-coding	11.37	24.27	5.73	2.7	3.01	20.73	1.25	-2.46625
chr2	177337821	177338321	Intergenic	Arthur1B|DNA|hAT-Tip100	127709	NR_031648	100302142		NR_031648	ENSG00000283203	MIR1246	MIRN1246|hsa-mir-1246	microRNA 1246	ncRNA	12.29	22.81	5.53	3.94	2.22	7.12	5.95	-2.62247
chr4	70698293	70698793	Intergenic	LTR76|LTR|ERV1	27327	NM_005420	6783	Hs.479898	NM_005420	ENSG00000109193	SULT1E1	EST|EST-1|ST1E1|STE	sulfotransferase family 1E member 1	protein-coding	2.38	1.78	3.06	47.07	19.47	27.69	28.98	2.83947
chr1	116371868	116372368	Intergenic	Intergenic	11215	NM_001111061	4808	Hs.46296	NM_005599	ENSG00000177551	NHLH2	HEN2|NSCL2|bHLHa34	nescient helix-loop-helix 2	protein-coding	12.47	24.59	6.32	1.66	2.37	3.71	6.42	-2.79089
chr5	22649193	22649693	intron (NM_004061, intron 1 of 14)	MIRb|SINE|MIR	204288	NM_004061	1010	Hs.113684	NM_004061	ENSG00000154162	CDH12	CDHB	cadherin 12	protein-coding	2.38	4.04	2.67	48.73	12.03	23.98	22.71	2.33384
chr2	206839986	206840486	Intergenic	Intergenic	110670	NM_017759	54891	Hs.445036	NM_017759	ENSG00000114933	INO80D	-	INO80 complex subunit D	protein-coding	2.93	2.27	2.77	43.54	34.03	71.93	34.46	3.64064
chr20	44280188	44280688	intron (NM_147197, intron 2 of 4)	L1PA4|LINE|L1	18440	NM_147197	259239	Hs.374924	NM_147197	ENSG00000180083	WFDC11	WAP11	WAP four-disulfide core domain 11	protein-coding	1.28	2.75	2.17	44.37	8.7	67.75	23.97	2.73761
chr6	158455196	158455696	intron (NM_003898, intron 4 of 26)	intron (NM_003898, intron 4 of 26)	17366	NM_001178088	8871	Hs.434494	NM_003898	ENSG00000078269	SYNJ2	INPP5H	synaptojanin 2	protein-coding	4.22	7.6	2.86	26.54	17.41	95.13	54.2	2.48852
chr3	176187567	176188067	Intergenic	LTR22C|LTR|ERVK	-45074	NR_107017	102465858		NR_107017	ENSG00000283333	MIR7977	hsa-mir-7977	microRNA 7977	ncRNA	1.65	3.07	2.86	21.57	29.75	4.49	4.07	2.57289
chr13	106781633	106782133	Intergenic	Intergenic	-247028	NR_034119	728192	Hs.559194	NR_034119		LINC00460	-	long intergenic non-protein coding RNA 460	ncRNA	1.1	0.32	1.48	16.59	15.35	1.7	16.92	2.9731
chr3	76998584	76999084	Intergenic	Intergenic	-90460	NM_001290039	6092	Hs.13305	NM_002942	ENSG00000185008	ROBO2	SAX3	roundabout guidance receptor 2	protein-coding	1.65	1.78	1.58	21.77	9.02	6.65	17.7	2.32394
chr3	164851200	164851700	Intergenic	Intergenic	-55167	NM_001041	6476	Hs.429596	NM_001041	ENSG00000090402	SI	-	sucrase-isomaltase	protein-coding	1.1	1.13	1.28	17.63	19.47	4.8	6.27	3.08776
chr20	33762467	33762967	exon (NM_006404, exon 2 of 4)	exon (NM_006404, exon 2 of 4)	2977	NM_006404	10544	Hs.647450	NM_006404	ENSG00000101000	PROCR	CCCA|CCD41|EPCR	protein C receptor	protein-coding	4.95	7.44	3.26	27.99	17.57	174.18	23.34	2.38136
chr12	60660274	60660774	Intergenic	Tigger3b|DNA|TcMar-Tigger	577406	NR_073056	9194	Hs.88156	NM_004731	ENSG00000118596	SLC16A7	MCT2	solute carrier family 16 member 7	protein-coding	0.73	0.81	0.59	14.51	5.06	4.18	20.52	3.07894
chr4	158380896	158381396	Intergenic	Intergenic	-112496	NR_026992	340017	Hs.428275	NR_026992	ENSG00000234111	LOC340017	-	uncharacterized LOC340017	ncRNA	16.33	11.49	4.44	2.7	1.58	4.64	4.7	-2.82442
chr1	68567500	68568000	intron (NR_040077, intron 6 of 9)	intron (NR_040077, intron 6 of 9)	-50436	NM_004675	9077	Hs.194695	NM_004675	ENSG00000162595	DIRAS3	ARHI|NOEY2	DIRAS family GTPase 3	protein-coding	2.02	0.97	0.89	10.99	2.22	53.52	9.87	2.60713
chr20	52354946	52355446	Intergenic	Intergenic	130303	NR_134576	105372672	Hs.259350	NR_134576	ENSG00000235415	LOC105372672	-	uncharacterized LOC105372672	ncRNA	4.04	4.37	4.64	22.6	19.78	158.55	38.38	2.33908
chr7	15707559	15708059	non-coding (NR_134258, exon 1 of 4)	non-coding (NR_134258, exon 1 of 4)	237	NR_134258	105375166	Hs.658822	NR_134258	ENSG00000237070	LOC105375166	-	uncharacterized LOC105375166	ncRNA	0.37	1.78	1.28	16.38	11.24	21.5	12.84	3.1287
chr2	234330847	234331347	intron (NM_003648, intron 2 of 28)	intron (NM_003648, intron 2 of 28)	34297	NM_003648	8527	Hs.471675	NM_003648	ENSG00000077044	DGKD	DGKdelta|dgkd-2	diacylglycerol kinase delta	protein-coding	5.87	13.91	4.54	37.95	37.51	87.55	106.51	2.3784
chr11	6273319	6273819	Intergenic	Intergenic	-7335	NM_001318029	887	Hs.203	NM_176875	ENSG00000110148	CCKBR	CCK-B|CCK2R|GASR	cholecystokinin B receptor	protein-coding	3.67	1.78	3.65	76.72	8.23	12.99	46.36	2.66314
chr19	33539718	33540218	intron (NM_033103, intron 1 of 14)	intron (NM_033103, intron 1 of 14)	15856	NM_033103	85415	Hs.466435	NM_033103	ENSG00000131941	RHPN2	P76RBE|RHOBP	rhophilin Rho GTPase binding protein 2	protein-coding	2.57	2.75	0.69	27.37	17.41	15.47	39	2.66409
chr8	37329970	37330470	intron (NR_121620, intron 3 of 6)	intron (NR_121620, intron 3 of 6)	21211	NR_121620	100507420	Hs.105962	NR_121620		LINC01605	-	long intergenic non-protein coding RNA 1605	ncRNA	0.92	2.43	2.96	8.71	18.52	20.88	35.71	3.1289
chr5	124244305	124244805	Intergenic	Intergenic	-127969	NR_109882	101927421	Hs.121305	NR_109882		LOC101927421	-	uncharacterized LOC101927421	ncRNA	1.65	1.62	1.09	18.25	10.76	11.14	9.87	2.53883
chr3	177017841	177018341	intron (NR_047465, intron 1 of 1)	intron (NR_047465, intron 1 of 1)	5861	NR_047465	100820709	Hs.518409	NR_047465	ENSG00000203645	LINC00501	-	long intergenic non-protein coding RNA 501	ncRNA	3.85	5.82	5.04	72.16	56.98	79.2	39.16	2.99957
chr6	95494698	95495198	Intergenic	L1PA7|LINE|L1	530379	NR_104136	101927288	Hs.616643	NR_047502	ENSG00000261366	MANEA-AS1	-	MANEA antisense RNA 1 (head to head)	ncRNA	4.04	4.04	6.02	71.54	14.4	66.05	34.3	2.33677
chr9	88708633	88709133	intron (NM_177937, intron 1 of 9)	intron (NM_177937, intron 1 of 9)	5627	NM_016548	51280	Hs.494337	NM_016548	ENSG00000135052	GOLM1	C9orf155|GOLPH2|GP73|HEL46|PSEC0257|bA379P1.3	golgi membrane protein 1	protein-coding	2.2	5.02	1.98	46.66	23.74	120.66	75.34	3.62651
chr10	79708886	79709386	Intergenic	Intergenic	22566	NR_024585	100128292	Hs.547908	NR_024585		DLG5-AS1	-	DLG5 antisense RNA 1	ncRNA	13.39	37.86	5.53	1.45	3.96	10.98	3.13	-2.89777
chr14	101213263	101213763	Intergenic	Tigger3b|DNA|TcMar-Tigger	20311	NM_001317172	8788	Hs.116631	NM_003836	ENSG00000185559	DLK1	DLK|DLK-1|Delta1|FA1|PREF1|Pref-1|ZOG|pG2	delta like non-canonical Notch ligand 1	protein-coding	5.69	32.84	4.94	1.04	2.22	14.54	1.88	-2.70705
chr3	12486565	12487065	Intergenic	Intergenic	-39116	NM_001321278	80746	Hs.335550	NM_025265	ENSG00000154743	TSEN2	PCH2B|SEN2|SEN2L	tRNA splicing endonuclease subunit 2	protein-coding	4.59	4.53	4.54	59.72	29.28	61.88	77.85	2.72839
chr5	17445266	17445766	intron (NR_134270, intron 1 of 2)	intron (NR_134270, intron 1 of 2)	1397	NR_134270	102723526		NR_134270	ENSG00000249662	LOC102723526	-	uncharacterized LOC102723526	ncRNA	0.37	2.59	2.96	22.19	5.06	14.54	25.22	2.39726
chr5	71462443	71462943	intron (NM_005909, intron 2 of 6)	intron (NM_005909, intron 2 of 6)	-2601	NR_039967	100616377		NR_039967	ENSG00000264099	MIR4803	-	microRNA 4803	ncRNA	10.09	30.42	7.51	4.56	2.06	13.15	1.72	-2.63602
chr5	112073254	112073754	promoter-TSS (NM_000038)	promoter-TSS (NM_000038)	-52	NM_001127510	324	Hs.158932	NM_000038	ENSG00000134982	APC	BTPS2|DP2|DP2.5|DP3|GS|PPP1R46	APC, WNT signaling pathway regulator	protein-coding	10.64	55.49	10.37	3.53	7.75	5.72	6.89	-2.38795
chr1	27317034	27317534	Intergenic	L2a|LINE|L2	-2911	NM_001013642	388610	Hs.355747	NM_001013642	ENSG00000253368	TRNP1	C1orf225|TNRP	TMF1-regulated nuclear protein 1	protein-coding	1.83	1.46	2.37	8.92	10.13	50.74	34.15	2.8443
chr2	36650306	36650806	intron (NM_016441, intron 2 of 16)	intron (NM_016441, intron 2 of 16)	67186	NM_016441	51232	Hs.699247	NM_016441	ENSG00000150938	CRIM1	CRIM-1|S52	cysteine rich transmembrane BMP regulator 1	protein-coding	1.1	1.46	1.58	30.27	3.96	22.74	4.07	2.36847
chr2	70191450	70191950	intron (NR_033872, intron 9 of 10)	intron (NR_033872, intron 9 of 10)	-2303	NM_152792	151516	Hs.516253	NM_152792	ENSG00000244617	ASPRV1	MUNO|SASP|SASPase|Taps	aspartic peptidase, retroviral-like 1	protein-coding	2.93	3.24	3.36	31.93	23.11	92.35	29.29	2.92368
chr3	54356353	54356853	intron (NM_018398, intron 3 of 37)	MIR|SINE|MIR	199910	NM_018398	55799	Hs.656687	NM_018398	ENSG00000157445	CACNA2D3	HSA272268	calcium voltage-gated channel auxiliary subunit alpha2delta 3	protein-coding	2.02	2.27	1.98	33.18	6.17	13.77	21.15	2.39005
chr1	210928610	210929110	intron (NM_172362, intron 10 of 10)	intron (NM_172362, intron 10 of 10)	378597	NM_002238	3756	Hs.553187	NM_002238	ENSG00000143473	KCNH1	EAG|EAG1|Kv10.1|TMBTS|ZLS1|h-eag|hEAG1	potassium voltage-gated channel subfamily H member 1	protein-coding	10.46	15.69	6.81	1.45	1.11	12.22	2.82	-2.98293
chr20	6541574	6542074	Intergenic	MER51A|LTR|ERV1	134445	NR_109953	101929244	Hs.542488	NR_109953	ENSG00000229876	CASC20	-	cancer susceptibility candidate 20 (non-protein coding)	ncRNA	4.4	2.75	2.07	54.53	15.67	10.52	6.27	2.49312
chr3	100354025	100354525	promoter-TSS (NM_001308362)	promoter-TSS (NM_001308362)	-107	NM_001308362	84873	Hs.334511	NM_032787	ENSG00000144820	ADGRG7	GPR128	adhesion G protein-coupled receptor G7	protein-coding	1.47	0.97	1.98	29.44	20.26	18.41	17.7	3.39341
chr6	47387263	47387763	Intergenic	Intergenic	-58012	NM_012120	23607	Hs.485518	NM_012120	ENSG00000198087	CD2AP	CMS	CD2 associated protein	protein-coding	0.92	0.32	2.07	8.29	13.29	7.89	13.78	2.52765
chr1	209989217	209989717	Intergenic	Intergenic	-9947	NM_006147	3664	Hs.591415	NM_006147	ENSG00000117595	IRF6	LPS|OFC6|PIT|PPS|PPS1|VWS|VWS1	interferon regulatory factor 6	protein-coding	15.78	26.53	8.1	2.28	2.85	5.72	4.07	-3.05876
chr7	55838387	55838887	Intergenic	Intergenic	-66377	NR_003949	360132	Hs.446691	NM_182827	ENSG00000176826	FKBP9P1	FKBP9L	FK506 binding protein 9 pseudogene 1	pseudo	11.37	2.43	2.57	3.53	131.36	28.62	7.05	2.67216
chr3	146229270	146229770	Intergenic	Intergenic	-15742	NM_001199979	57047	Hs.744414	NM_020359	ENSG00000163746	PLSCR2	-	phospholipid scramblase 2	protein-coding	0.92	1.94	1.48	9.95	11.87	20.73	12.69	2.34169
chr8	5032857	5033357	Intergenic	L1ME3|LINE|L1	-180779	NM_033225	64478	Hs.571466	NM_033225	ENSG00000183117	CSMD1	PPP1R24	CUB and Sushi multiple domains 1	protein-coding	7.52	26.21	5.43	0.41	2.69	10.52	1.1	-2.93013
chr8	143897076	143897576	Intergenic	Intergenic	-18891	NM_002066	2765	Hs.661218	NM_002066	ENSG00000104499	GML	LY6DL	glycosylphosphatidylinositol anchored molecule like	protein-coding	24.58	67.14	9.09	10.16	4.75	15.62	2.35	-2.93689
chr8	9161351	9161851	Intergenic	Intergenic	-20960	NR_040039	157273	Hs.650222	NR_040039	ENSG00000254235	LOC157273	-	uncharacterized LOC157273	ncRNA	1.28	2.43	2.07	40.23	5.7	16.86	1.72	2.78252
chr16	72015759	72016259	exon (NM_181536, exon 7 of 31)	exon (NM_181536, exon 7 of 31)	17868	NM_181536	342372	Hs.675286	NM_181536	ENSG00000277481	PKD1L3	-	polycystin 1 like 3, transient receptor potential channel interacting	protein-coding	2.75	3.4	1.38	33.18	4.91	23.51	15.19	2.38812
chr16	68692317	68692817	intron (NM_001793, intron 2 of 15)	intron (NM_001793, intron 2 of 15)	13828	NM_001317196	1001	Hs.191842	NM_001793	ENSG00000062038	CDH3	CDHP|HJMD|PCAD	cadherin 3	protein-coding	17.06	27.02	6.62	4.15	1.9	19.49	3.13	-2.40391
chr13	82331489	82331989	Intergenic	THE1B|LTR|ERVL-MaLR	-530621	NR_047494	100861546	Hs.539621	NR_047494	ENSG00000260094	LINC00564	-	long intergenic non-protein coding RNA 564	ncRNA	1.47	1.13	2.67	28.2	13.29	21.04	7.68	2.49915
chr8	60307210	60307710	Intergenic	Tigger3c|DNA|TcMar-Tigger	-275693	NM_014729	9760	Hs.491805	NM_014729	ENSG00000198846	TOX	TOX1	thymocyte selection associated high mobility group box	protein-coding	2.2	1.13	1.98	9.95	12.66	14.54	31.17	2.38119
chr20	42185064	42185564	Intergenic	Intergenic	-2321	NM_170693	10110	Hs.300863	NM_016276	ENSG00000101049	SGK2	H-SGK2|dJ138B7.2	SGK2, serine/threonine kinase 2	protein-coding	2.02	1.46	2.27	25.3	13.29	43.78	5.8	2.68893
chr7	97602497	97602997	Intergenic	MER51E|LTR|ERV1	-1109	NR_002822	389538	Hs.655977	NR_002822		MGC72080	-	MGC72080 pseudogene	pseudo	3.49	2.75	3.06	63.66	9.97	11.14	49.34	2.73387
chr6	7561514	7562014	intron (NM_001008844, intron 4 of 23)	intron (NM_001008844, intron 4 of 23)	19956	NM_004415	1832	Hs.519873	NM_004415	ENSG00000096696	DSP	DCWHKTA|DP	desmoplakin	protein-coding	6.05	5.66	2.47	76.1	30.7	91.58	69.86	2.9668
chrX	27616345	27616845	Intergenic	HERV1_LTRb|LTR|ERV1	-135137	NR_002784	139420	Hs.350673	NR_002784	ENSG00000224960	PPP4R3CP	FLFL3P|SMEK3P|smk1	protein phosphatase 4 regulatory subunit 3C, pseudogene	pseudo	0.73	0.65	0.99	8.29	2.06	13.92	13	2.63674
chr19	31704977	31705477	intron (NR_138036, intron 2 of 4)	intron (NR_138036, intron 2 of 4)	135204	NR_138034	57616	Hs.278436	NM_020856	ENSG00000121297	TSHZ3	TSH3|ZNF537	teashirt zinc finger homeobox 3	protein-coding	13.57	29.45	9.38	2.49	5.22	16.24	6.11	-2.34916
chr15	25726492	25726992	Intergenic	Intergenic	-42567	NM_130839	7337	Hs.598862	NM_000462	ENSG00000114062	UBE3A	ANCR|AS|E6-AP|EPVE6AP|HPVE6A	ubiquitin protein ligase E3A	protein-coding	21.65	50.15	9.38	3.73	4.43	14.7	4.39	-2.90913
chr6	80693904	80694404	Intergenic	Intergenic	-20168	NM_003318	7272	Hs.169840	NM_003318	ENSG00000112742	TTK	CT96|ESK|MPH1|MPS1|MPS1L1|PYT	TTK protein kinase	protein-coding	15.59	20.22	7.6	2.49	1.74	9.75	2.66	-2.90386
chr2	54265945	54266445	intron (NM_001320587, intron 2 of 5)	L2a|LINE|L2	67955	NM_001320586	98	Hs.516173	NM_138448	ENSG00000170634	ACYP2	ACYM|ACYP	acylphosphatase 2	protein-coding	2.02	1.29	0.89	10.78	7.91	17.79	6.58	2.48779
chr2	227545322	227545822	Intergenic	Intergenic	-22063	NR_049887	100847053		NR_049887	ENSG00000263363	MIR5702	-	microRNA 5702	ncRNA	1.47	1.13	1.68	13.27	27.06	7.89	24.43	3.49192
chr11	102344238	102344738	intron (NR_135076, intron 1 of 2)	MER50|LTR|ERV1	6502	NR_135076	102723838	Hs.738066	NR_135076	ENSG00000255482	LOC102723838	-	uncharacterized LOC102723838	ncRNA	3.12	2.59	1.68	14.1	10.13	63.42	64.69	2.81229
chr5	16521540	16522040	intron (NM_001034850, intron 3 of 8)	intron (NM_001034850, intron 3 of 8)	-12683	NM_019000	54463	Hs.481704	NM_019000	ENSG00000154153	FAM134B	JK-1|JK1	family with sequence similarity 134 member B	protein-coding	3.49	1.29	2.67	71.75	11.55	37.43	9.4	2.64755
chr5	7181889	7182389	Intergenic	Intergenic	87328	NR_039659	100616234		NR_039659	ENSG00000283468	MIR4454	-	microRNA 4454	ncRNA	0.73	0.49	1.19	13.06	3.64	24.9	1.25	2.90111
chr9	79249274	79249774	intron (NM_001330680, intron 7 of 10)	MER57C2|LTR|ERV1	57807	NM_001330680	158471	Hs.262857	NM_015225	ENSG00000106772	PRUNE2	BMCC1|BNIPXL|C9orf65|KIAA0367	prune homolog 2	protein-coding	1.1	1.78	2.86	43.75	24.37	25.21	54.35	3.34575
chr6	113964171	113964671	intron (NR_125844, intron 1 of 2)	intron (NR_125844, intron 1 of 2)	6856	NR_125844	101927686	Hs.402044	NR_125844	ENSG00000230943	LOC101927686	-	uncharacterized LOC101927686	ncRNA	1.28	2.1	1.98	21.15	28.01	20.88	37.12	3.82606
chr13	40634383	40634883	Intergenic	Intergenic	-121313	NR_046870	100874127	Hs.578028	NR_046870	ENSG00000230710	LINC00332	NCRNA00332	long intergenic non-protein coding RNA 332	ncRNA	10.82	26.37	8.39	2.07	2.53	4.64	2.98	-3.30856
chr6	131264787	131265287	intron (NM_001135555, intron 3 of 14)	intron (NM_001135555, intron 3 of 14)	56870	NM_001252660	2037	Hs.486470	NM_001431	ENSG00000079819	EPB41L2	4.1-G|4.1G	erythrocyte membrane protein band 4.1 like 2	protein-coding	0.55	0.81	1.48	8.5	4.75	18.72	11.75	2.60612
chr6	15949489	15949989	Intergenic	Intergenic	-179578	NM_013262	29116	Hs.484738	NM_013262	ENSG00000007944	MYLIP	IDOL|MIR	myosin regulatory light chain interacting protein	protein-coding	1.83	5.5	1.98	53.5	27.7	57.85	52.63	3.59043
chr2	81885346	81885846	Intergenic	LTR10F|LTR|ERV1	-191526	NR_110161	100507201	Hs.98589	NR_110161		LINC01815	-	long intergenic non-protein coding RNA 1815	ncRNA	2.2	1.13	2.57	14.1	18.52	20.57	32.89	2.79792
chr4	9453927	9454427	Intergenic	HERVE-int|LTR|ERV1	7917	NM_001040448	644414	Hs.590200	NM_001040448	ENSG00000186146	DEFB131	DEFB-31	defensin beta 131	protein-coding	0	2.1	1.19	13.69	4.91	17.79	10.18	2.65574
chr3	197317186	197317686	Intergenic	Intergenic	-17242	NM_203315	622	Hs.274539	NM_004051	ENSG00000161267	BDH1	BDH|SDR9C1	3-hydroxybutyrate dehydrogenase 1	protein-coding	2.75	3.24	2.67	16.17	13.14	103.49	19.58	2.66576
chr3	38034121	38034621	promoter-TSS (NM_015873)	promoter-TSS (NM_015873)	-707	NM_015873	50853	Hs.103665	NM_015873	ENSG00000136059	VILL	-	villin like	protein-coding	7.15	9.87	6.02	59.72	41.78	112.15	88.81	2.55166
chr1	183167546	183168046	intron (NM_018891, intron 1 of 21)	intron (NM_018891, intron 1 of 21)	12622	NM_018891	3918	Hs.591484	NM_005562	ENSG00000058085	LAMC2	B2T|BM600|CSF|EBR2|EBR2A|LAMB2T|LAMNB2	laminin subunit gamma 2	protein-coding	9.72	35.27	6.32	2.07	2.22	8.82	1.72	-3.01263
chr16	85368874	85369374	Intergenic	Intergenic	-29193	NR_049816	100847022		NR_049816	ENSG00000266307	MIR5093	-	microRNA 5093	ncRNA	5.32	9.71	3.95	69.88	28.01	107.97	43.39	2.6338
chr20	9310803	9311303	intron (NM_000933, intron 1 of 35)	intron (NM_000933, intron 1 of 35)	22606	NM_000933	5332	Hs.472101	NM_000933	ENSG00000101333	PLCB4	ARCND2|PI-PLC	phospholipase C beta 4	protein-coding	3.12	2.27	2.27	48.31	12.19	15.16	13.94	2.4506
chr11	116678914	116679414	Intergenic	MIRb|SINE|MIR	14847	NM_000482	337	Hs.1247	NM_000482	ENSG00000110244	APOA4	-	apolipoprotein A4	protein-coding	2.93	3.88	3.56	25.71	20.42	34.65	63.59	2.58788
chr6	2259233	2259733	intron (NR_046229, intron 2 of 6)	intron (NR_046229, intron 2 of 6)	13496	NR_046229	100508120	Hs.188825	NR_046229		GMDS-AS1	-	GMDS antisense RNA 1 (head to head)	ncRNA	1.83	2.43	1.68	23.85	17.73	16.71	31.01	2.8628
chr4	48670594	48671094	intron (NM_015030, intron 3 of 63)	intron (NM_015030, intron 3 of 63)	111472	NM_015030	285527	Hs.595553	NM_015030	ENSG00000075539	FRYL	AF4p12|KIAA0826|MOR2	FRY like transcription coactivator	protein-coding	1.47	1.29	0.89	6.43	11.87	19.49	11.12	2.70117
chr6	48744981	48745481	Intergenic	L1MA2|LINE|L1	685810	NM_000255	4594	Hs.485527	NM_000255	ENSG00000146085	MUT	MCM	methylmalonyl-CoA mutase	protein-coding	17.43	19.09	9.28	1.66	2.69	1.39	3.29	-3.72276
chr3	170048872	170049372	Intergenic	Intergenic	-26351	NM_001145098	6498	Hs.536655	NM_005414	ENSG00000136603	SKIL	SNO|SnoA|SnoI|SnoN	SKI like proto-oncogene	protein-coding	5.14	1.29	2.07	43.34	32.13	47.18	40.1	3.0901
chr14	70059646	70060146	Intergenic	Intergenic	-18296	NM_001271507	56936	Hs.458319	NM_020181	ENSG00000267909	CCDC177	C14orf162|PLPL	coiled-coil domain containing 177	protein-coding	11.56	21.36	5.93	1.87	2.06	8.66	3.29	-2.84101
chr2	65590219	65590719	intron (NM_181784, intron 1 of 5)	intron (NM_181784, intron 1 of 5)	3462	NM_001128210	200734	Hs.59332	NM_181784	ENSG00000198369	SPRED2	Spred-2	sprouty related EVH1 domain containing 2	protein-coding	0.37	2.59	1.48	4.56	6.65	13.92	17.86	2.63908
chr2	234318292	234318792	intron (NM_003648, intron 2 of 28)	intron (NM_003648, intron 2 of 28)	21742	NM_003648	8527	Hs.471675	NM_003648	ENSG00000077044	DGKD	DGKdelta|dgkd-2	diacylglycerol kinase delta	protein-coding	1.65	1.94	1.98	14.31	17.73	22.89	41.19	2.75387
chr12	103084036	103084536	Intergenic	Intergenic	133891	NR_033855	283432	Hs.382110	NR_033855	ENSG00000258169	LINC00485	-	long intergenic non-protein coding RNA 485	ncRNA	0.37	1.78	1.88	12.86	14.72	5.26	22.87	2.78698
chr2	219176898	219177398	intron (NM_015488, intron 2 of 9)	MLT1L|LTR|ERVL-MaLR	-10754	NM_022572	25953	Hs.98475	NM_015488	ENSG00000127838	PNKD	BRP17|DYT8|FKSG19|FPD1|KIPP1184|MR-1|MR1|PDC|PKND1|TAHCCP2	paroxysmal nonkinesigenic dyskinesia	protein-coding	2.57	1.46	2.47	31.1	40.52	43.62	36.97	3.80705
chr11	57446813	57447313	intron (NM_015457, intron 2 of 11)	intron (NM_015457, intron 2 of 11)	11589	NM_015457	25921	Hs.27239	NM_015457	ENSG00000156599	ZDHHC5	DHHC5|ZNF375	zinc finger DHHC-type containing 5	protein-coding	17.24	27.18	7.11	5.81	3.01	5.72	4.07	-2.83613
chr13	30141560	30142060	intron (NM_003045, intron 1 of 12)	intron (NM_003045, intron 1 of 12)	28015	NM_003045	6541	Hs.14846	NM_003045	ENSG00000139514	SLC7A1	ATRC1|CAT-1|ERR|HCAT1|REC1L	solute carrier family 7 member 1	protein-coding	22.01	46.76	8.79	2.28	3.64	6.19	3.45	-3.50176
chr3	75690139	75690639	Intergenic	Intergenic	10475	NR_031714	100302212		NR_031714		MIR1324	MIRN1324|hsa-mir-1324	microRNA 1324	ncRNA	8.44	24.92	16.49	4.15	2.37	7.89	7.21	-2.63774
chr2	101663821	101664321	intron (NR_138475, intron 5 of 18)	intron (NR_138475, intron 5 of 18)	45380	NM_001098577	6160	Hs.469473	NM_000993	ENSG00000071082	RPL31	L31	ribosomal protein L31	protein-coding	15.59	32.84	6.12	2.28	4.75	7.12	8.93	-2.49394
chr3	78451859	78452359	Intergenic	L2b|LINE|L2	616500	NM_001145845	6091	Hs.744218	NM_002941	ENSG00000169855	ROBO1	DUTT1|SAX3	roundabout guidance receptor 1	protein-coding	12.29	25.56	5.43	2.49	3.32	0.77	2.82	-3.13289
chr13	31884815	31885315	intron (NM_194318, intron 12 of 14)	LTR27B|LTR|ERV1	110953	NM_194318	145173	Hs.13205	NM_194318	ENSG00000187676	B3GLCT	B3GALTL|B3GTL|B3Glc-T|Gal-T|beta3Glc-T	beta 3-glucosyltransferase	protein-coding	19.26	25.89	9.68	1.24	2.06	2.63	3.29	-4.04303
chr8	30112237	30112737	Intergenic	Intergenic	98674	NM_006571	10671	Hs.158427	NM_006571	ENSG00000104671	DCTN6	WS-3|WS3|p27	dynactin subunit 6	protein-coding	2.02	2.59	1.98	51.42	6.49	15.78	18.01	2.40565
chr14	50108480	50108980	Intergenic	Intergenic	-6782	NM_001083908	55172	Hs.231761	NM_018139	ENSG00000165506	DNAAF2	C14orf104|CILD10|KTU|PF13	dynein axonemal assembly factor 2	protein-coding	1.28	3.72	2.57	41.26	11.71	30.32	20.99	2.44281
chr2	219913976	219914476	Intergenic	Intergenic	-7953	NM_001278296	255101	Hs.147762	NM_152389	ENSG00000181378	CFAP65	CCDC108	cilia and flagella associated protein 65	protein-coding	3.49	5.34	4.05	49.35	14.4	46.1	42.13	2.3733
chr2	147789444	147789944	Intergenic	Intergenic	445069	NR_026904	728773	Hs.334462	NR_026904		PABPC1P2	PABP2|PABP4|PABPCP2|PABPCP4	poly(A) binding protein cytoplasmic 1 pseudogene 2	pseudo	1.47	2.43	1.09	12.03	21.05	8.51	10.96	2.63563
chr2	86876239	86876739	intron (NM_001198954, intron 2 of 7)	L1MEc|LINE|L1	-25489	NM_005667	7844	Hs.469199	NM_005667	ENSG00000239305	RNF103	HKF-1|KF-1|KF1|ZFP-103|ZFP103	ring finger protein 103	protein-coding	2.57	2.91	1.48	30.07	20.89	51.05	38.69	3.19858
chr8	116750808	116751308	Intergenic	L2c|LINE|L2	-69803	NM_001330599	7227	Hs.657018	NM_014112	ENSG00000104447	TRPS1	GC79|LGCR	transcriptional repressor GATA binding 1	protein-coding	16.69	34.46	7.8	1.87	1.11	3.4	2.66	-4.45273
chr18	20263272	20263772	Intergenic	Intergenic	103278	NR_110782	101927571	Hs.335020	NR_110782	ENSG00000266850	LOC101927571	-	uncharacterized LOC101927571	ncRNA	4.59	4.53	4.25	26.54	30.07	89.25	46.68	2.43183
chr8	86148823	86149323	Intergenic	Intergenic	-8643	NM_198584	377677	Hs.127189	NM_198584	ENSG00000185015	CA13	CAXIII	carbonic anhydrase 13	protein-coding	2.93	2.1	1.88	25.5	11.4	22.58	27.88	2.52617
chr1	168464745	168465245	promoter-TSS (NR_125956)	promoter-TSS (NR_125956)	-113	NR_125956	101928565	Hs.563806	NR_125956	ENSG00000228697	LOC101928565	-	uncharacterized LOC101928565	ncRNA	1.28	0.32	1.38	5.81	11.24	6.96	16.45	2.62842
chr6	122081258	122081758	Intergenic	L1P3|LINE|L1	324785	NM_000165	2697	Hs.74471	NM_000165	ENSG00000152661	GJA1	AVSD3|CMDR|CX43|EKVP|GJAL|HLHS1|HSS|ODDD|PPKCA	gap junction protein alpha 1	protein-coding	10.09	17.15	4.15	4.35	2.06	5.41	1.88	-2.79745
chr16	46934323	46934823	intron (NM_001142466, intron 3 of 11)	intron (NM_001142466, intron 3 of 11)	15547	NM_001142466	84706	Hs.460693	NM_133443	ENSG00000166123	GPT2	ALT2|GPT 2|MRT49	glutamic--pyruvic transaminase 2	protein-coding	22.2	48.05	10.07	1.45	4.11	6.65	5.01	-3.81412
chr9	10228092	10228592	intron (NM_002839, intron 3 of 45)	intron (NM_002839, intron 3 of 45)	384381	NM_002839	5789	Hs.446083	NM_002839	ENSG00000153707	PTPRD	HPTP|HPTPD|HPTPDELTA|PTPD|RPTPDELTA	protein tyrosine phosphatase, receptor type D	protein-coding	0.73	1.94	1.38	10.16	10.92	0.31	20.21	2.57299
chr1	241355049	241355549	intron (NM_002924, intron 2 of 17)	L1MDa|LINE|L1	59727	NR_036069	100422856		NR_036069	ENSG00000265831	MIR3123	mir-3123	microRNA 3123	ncRNA	1.83	0.65	1.58	37.74	21.37	31.87	42.92	3.64701
chr6	47427907	47428407	Intergenic	Intergenic	-17368	NM_012120	23607	Hs.485518	NM_012120	ENSG00000198087	CD2AP	CMS	CD2 associated protein	protein-coding	2.2	4.21	2.67	47.69	38.62	51.51	52.63	3.16274
chr12	105608330	105608830	intron (NM_001251905, intron 4 of 20)	MER21C|LTR|ERVL	18603	NM_001251905	55198	Hs.506603	NM_018171	ENSG00000136044	APPL2	DIP13B	adaptor protein, phosphotyrosine interacting with PH domain and leucine zipper 2	protein-coding	3.49	5.02	2.27	38.98	18.36	77.81	27.41	2.43687
chr20	52684149	52684649	TTS (NR_039913)	TTS (NR_039913)	625	NR_039913	100616225		NR_039913	ENSG00000265595	MIR4756	-	microRNA 4756	ncRNA	8.62	19.58	7.41	136.23	82.14	660.36	154.13	3.30627
chr7	36894899	36895399	non-coding (NR_038120, exon 6 of 6)	non-coding (NR_038120, exon 6 of 6)	63888	NR_031604	100302113		NR_031604	ENSG00000221325	MIR1200	MIRN1200|hsa-mir-1200	microRNA 1200	ncRNA	14.31	43.2	9.38	2.07	3.17	2.01	3.13	-3.69265
chr10	95766861	95767361	intron (NM_016341, intron 1 of 32)	intron (NM_016341, intron 1 of 32)	13365	NM_001288989	51196	Hs.655033	NM_016341	ENSG00000138193	PLCE1	NPHS3|PLCE|PPLC	phospholipase C epsilon 1	protein-coding	1.28	1.46	1.58	17.42	6.33	33.57	23.18	2.69273
chr6	43791732	43792232	Intergenic	Intergenic	52260	NM_001287044	7422	Hs.73793	NM_003376	ENSG00000112715	VEGFA	MVCD1|VEGF|VPF	vascular endothelial growth factor A	protein-coding	1.83	4.69	3.16	33.59	25.64	52.44	42.6	2.96321
chrX	68335905	68336405	Intergenic	Intergenic	49210	NM_145119	64219	Hs.522679	NM_022368	ENSG00000181191	PJA1	PRAJA1|RNF70	praja ring finger ubiquitin ligase 1	protein-coding	10.09	32.68	5.43	1.04	2.37	5.72	3.6	-3.40969
chr2	163606478	163606978	intron (NM_173162, intron 2 of 7)	intron (NM_173162, intron 2 of 7)	-18718	NR_110258	101929570	Hs.470445	NR_110258	ENSG00000237750	LOC101929570	-	uncharacterized LOC101929570	ncRNA	0.37	0	0.89	4.15	5.06	9.28	16.13	3.28841
chr5	40784231	40784731	intron (NM_006251, intron 1 of 8)	intron (NM_006251, intron 1 of 8)	13816	NM_206907	5562	Hs.43322	NM_006251	ENSG00000132356	PRKAA1	AMPK|AMPKa1	protein kinase AMP-activated catalytic subunit alpha 1	protein-coding	1.28	1.62	1.38	33.18	16.78	52.13	7.99	3.11803
chr7	139650867	139651367	intron (NM_001130966, intron 9 of 16)	L3|LINE|CR1	112404	NM_022750	64761	Hs.12646	NM_022750	ENSG00000059378	PARP12	ARTD12|MST109|MSTP109|ZC3H1|ZC3HDC1	poly(ADP-ribose) polymerase family member 12	protein-coding	1.1	2.75	0.99	4.98	14.56	12.53	36.18	2.61324
chr20	382367	382867	Intergenic	MER44D|DNA|TcMar-Tigger	-6077	NM_001323958	10616	Hs.29546	NM_006462	ENSG00000125826	RBCK1	C20orf18|HOIL-1|HOIL1|PBMEI|PGBM1|RBCK2|RNF54|UBCE7IP3|XAP3|XAP4|ZRANB4	RANBP2-type and C3HC4-type zinc finger containing 1	protein-coding	1.83	1.13	1.58	18.04	5.38	69.45	2.35	2.53749
chr9	14107941	14108441	intron (NM_001282787, intron 9 of 10)	intron (NM_001282787, intron 9 of 10)	72610	NM_001282787	4781	Hs.644095	NM_005596	ENSG00000147862	NFIB	CTF|HMGIC/NFIB|NF-I/B|NF1-B|NFI-B|NFI-RED|NFIB2|NFIB3	nuclear factor I B	protein-coding	0.37	0.32	1.88	11.82	15.04	4.49	21.15	3.01311
chr7	66437181	66437681	Intergenic	Intergenic	23157	NM_016038	51119	Hs.110445	NM_016038	ENSG00000126524	SBDS	CGI-97|SDS|SWDS	SBDS ribosome assembly guanine nucleotide exchange factor	protein-coding	2.75	1.46	1.58	69.46	15.35	14.85	15.51	3.39966
chr12	26209192	26209692	intron (NM_007211, intron 3 of 5)	intron (NM_007211, intron 3 of 5)	3951	NM_001164746	11228	Hs.696433	NM_007211	ENSG00000123094	RASSF8	C12orf2|HOJ1	Ras association domain family member 8	protein-coding	0.73	1.94	1.68	13.27	9.02	17.02	16.76	2.60983
chr10	112617969	112618469	Intergenic	L2c|LINE|L2	12443	NR_026932	282997	Hs.599931	NR_026932		PDCD4-AS1	-	PDCD4 antisense RNA 1	ncRNA	1.47	2.1	1.48	47.28	10.76	18.25	20.21	2.96849
chr11	76673898	76674398	intron (NM_001300954, intron 3 of 10)	MER61F|LTR|ERV1	-71237	NM_138706	192134	Hs.352622	NM_138706	ENSG00000198488	B3GNT6	B3Gn-T6|BGnT-6|beta-1,3-Gn-T6|beta3Gn-T6	UDP-GlcNAc:betaGal beta-1,3-N-acetylglucosaminyltransferase 6	protein-coding	1.1	1.13	1.48	35.04	12.98	19.65	23.81	3.16682
chr2	32554169	32554669	Intergenic	Intergenic	-27677	NM_016252	57448	Hs.150107	NM_016252	ENSG00000115760	BIRC6	APOLLON|BRUCE	baculoviral IAP repeat containing 6	protein-coding	2.57	1.62	0.99	27.79	9.81	19.03	11.12	2.40593
chr14	37935691	37936191	intron (NM_138731, intron 12 of 13)	intron (NM_138731, intron 12 of 13)	128384	NM_004496	3169	Hs.163484	NM_004496	ENSG00000129514	FOXA1	HNF3A|TCF3A	forkhead box A1	protein-coding	0.73	0.65	2.27	29.86	8.39	15	10.65	2.42752
chr8	126568507	126569007	Intergenic	Intergenic	124306	NM_001282985	10221	Hs.444947	NM_025195	ENSG00000173334	TRIB1	C8FW|GIG-2|GIG2|SKIP1|TRB-1|TRB1	tribbles pseudokinase 1	protein-coding	13.57	29.93	10.37	2.7	3.96	14.54	7.21	-2.36806
chr3	139153701	139154201	intron (NR_121609, intron 3 of 4)	intron (NR_121609, intron 3 of 4)	41401	NM_004164	5948	Hs.655516	NM_004164	ENSG00000114113	RBP2	CRABP-II|CRBP2|CRBPII|RBPC2	retinol binding protein 2	protein-coding	14.49	19.74	7.8	8.09	2.69	14.23	1.88	-2.4017
chr20	50847726	50848226	Intergenic	Intergenic	-39452	NM_199427	55734	Hs.473082	NM_018197	ENSG00000020256	ZFP64	ZNF338	ZFP64 zinc finger protein	protein-coding	0.73	0	0.79	20.11	17.73	135.97	7.36	4.98176
chr9	101136812	101137312	intron (NM_005458, intron 11 of 18)	MER68|LTR|ERVL	-119059	NM_018421	55357	Hs.371016	NM_018421	ENSG00000095383	TBC1D2	PARIS-1|PARIS1|TBC1D2A	TBC1 domain family member 2	protein-coding	2.02	2.27	3.46	53.08	12.34	70.69	18.33	2.77777
chr1	231162836	231163336	intron (NM_198552, intron 1 of 1)	intron (NM_198552, intron 1 of 1)	-7416	NR_031593	100302132		NR_031593	ENSG00000182118	MIR1182	MIRN1182|hsa-mir-1182	microRNA 1182	ncRNA	10.82	27.67	7.41	1.45	1.58	10.67	4.23	-3.09888
chr11	36521942	36522442	intron (NM_004620, intron 2 of 6)	L2a|LINE|L2	9671	NM_145803	7189	Hs.444172	NM_004620	ENSG00000175104	TRAF6	MGC:3310|RNF85	TNF receptor associated factor 6	protein-coding	1.28	2.91	2.47	5.6	13.61	14.7	14.57	2.33204
chrX	119019829	119020329	Intergenic	MER51A|LTR|ERV1	-9857	NM_001008534	158798	Hs.592245	NM_178813	ENSG00000186471	AKAP14	AKAP28|PRKA14	A-kinase anchoring protein 14	protein-coding	3.12	1.94	0.89	18.87	11.55	17.48	26.47	2.61911
chr6	122101461	122101961	Intergenic	MLT1G1|LTR|ERVL-MaLR	344988	NM_000165	2697	Hs.74471	NM_000165	ENSG00000152661	GJA1	AVSD3|CMDR|CX43|EKVP|GJAL|HLHS1|HSS|ODDD|PPKCA	gap junction protein alpha 1	protein-coding	18.53	42.23	11.65	1.66	2.85	2.78	4.23	-4.08545
chr1	33686603	33687103	Intergenic	Intergenic	-35321	NM_152493	149076	Hs.743358	NM_152493	ENSG00000160094	ZNF362	RN|lin-29	zinc finger protein 362	protein-coding	23.11	42.71	7.11	11.2	2.06	8.2	5.8	-2.70279
chr7	51134067	51134567	intron (NM_001346444, intron 7 of 7)	MIR|SINE|MIR	250241	NM_015198	23242	Hs.99141	NM_015198	ENSG00000106078	COBL	-	cordon-bleu WH2 repeat protein	protein-coding	1.65	1.94	1.19	84.19	16.78	13.77	16.6	3.18349
chr8	8483220	8483720	Intergenic	MLT1H|LTR|ERVL-MaLR	-76196	NM_194284	137075	Hs.183617	NM_194284	ENSG00000253958	CLDN23	CLDNL|hCG1646163	claudin 23	protein-coding	2.02	3.4	2.57	92.48	3.01	18.41	6.58	2.86344
chr13	111229036	111229536	Intergenic	L1MC2|LINE|L1	-15202	NM_017817	55647	Hs.743563	NM_017817	ENSG00000139832	RAB20	-	RAB20, member RAS oncogene family	protein-coding	0.73	0.81	1.09	15.76	11.71	20.11	33.52	3.21294
chr17	30115170	30115670	Intergenic	Intergenic	70673	NM_001330176	55352	Hs.462729	NM_018405	ENSG00000172301	COPRS	C17orf79|COPR5|HSA272196|TTP1	coordinator of PRMT5 and differentiation stimulator	protein-coding	14.12	35.27	5.73	3.94	1.58	8.35	1.88	-3.35718
chr8	8278298	8278798	Intergenic	Intergenic	-39204	NM_001080826	157285	Hs.583863	NM_001080826	ENSG00000275342	PRAG1	NACK|PEAK2|PRAGMIN|SGK223	PEAK1 related kinase activating pseudokinase 1	protein-coding	1.65	1.13	0.59	31.93	10.29	6.96	10.18	3.81354
chr7	117356948	117357448	intron (NM_033427, intron 22 of 22)	intron (NM_033427, intron 22 of 22)	156363	NM_033427	83992	Hs.592285	NM_033427	ENSG00000077063	CTTNBP2	C7orf8|CORTBP2|Orf4	cortactin binding protein 2	protein-coding	1.65	0.65	1.58	7.67	11.4	22.89	18.33	2.66794
chr9	116728631	116729131	intron (NM_001318040, intron 1 of 13)	intron (NM_001318040, intron 1 of 13)	90319	NM_133374	114991	Hs.349208	NM_133374	ENSG00000157657	ZNF618	FP13169|NEDD10	zinc finger protein 618	protein-coding	2.57	1.94	2.67	16.17	12.98	56.31	44.01	2.70299
chr18	53119499	53119999	promoter-TSS (NR_132985)	promoter-TSS (NR_132985)	-15	NR_132985	105372127	Hs.666721	NR_132985	ENSG00000267028	TCF4-AS1	MIR4529HG	TCF4 antisense RNA 1	ncRNA	14.86	24.75	7.51	2.49	2.06	0.62	3.92	-3.60801
chr5	43409865	43410365	intron (NM_001301873, intron 1 of 3)	intron (NM_001301873, intron 1 of 3)	2378	NM_001301873	56477	Hs.656904	NM_019846	ENSG00000151882	CCL28	CCK1|MEC|SCYA28	C-C motif chemokine ligand 28	protein-coding	1.47	3.07	1.78	91.24	17.88	9.28	9.87	3.1912
chrX	4748846	4749346	Intergenic	Charlie2b|DNA|hAT-Charlie	-197483	NR_110390	101928201	Hs.586488	NR_110390	ENSG00000236513	LOC101928201	-	uncharacterized LOC101928201	ncRNA	0.37	1.62	0.79	4.98	7.91	4.18	13.63	2.44943
chr1	162843779	162844279	Intergenic	Intergenic	-5424	NM_178550	339512	Hs.407631	NM_178550	ENSG00000185860	CCDC190	C1orf110	coiled-coil domain containing 190	protein-coding	1.83	0.81	1.58	15.34	9.97	10.05	35.24	3.16703
chr22	47004986	47005486	Intergenic	Intergenic	-11063	NM_015124	23151	Hs.475150	NM_015124	ENSG00000075240	GRAMD4	DIP|dA59H18.1|dJ439F8.1	GRAM domain containing 4	protein-coding	7.89	7.44	3.26	33.18	15.67	60.17	98.21	2.43841
chr15	96978186	96978686	Intergenic	LTR81|LTR|Gypsy	101867	NM_001145157	7026	Hs.347991	NM_021005	ENSG00000185551	NR2F2	ARP1|CHTD4|COUPTFB|COUPTFII|NF-E3|NR2F1|SVP40|TFCOUP2	nuclear receptor subfamily 2 group F member 2	protein-coding	1.1	1.13	1.58	15.14	5.38	6.96	11.59	2.41971
chr10	14967919	14968419	intron (NM_001289079, intron 13 of 15)	THE1C|LTR|ERVL-MaLR	28262	NM_001033857	64421	Hs.655932	NM_022487	ENSG00000152457	DCLRE1C	A-SCID|DCLREC1C|RS-SCID|SCIDA|SNM1C	DNA cross-link repair 1C	protein-coding	2.57	4.21	2.27	4.56	6.81	36.2	83.49	2.62149
chr20	31053328	31053828	intron (NM_001256798, intron 5 of 10)	intron (NM_001256798, intron 5 of 10)	17807	NM_080616	140688	Hs.516978	NM_080616	ENSG00000197183	NOL4L	C20orf112|C20orf113|dJ1184F4.2|dJ1184F4.4	nucleolar protein 4 like	protein-coding	2.93	9.38	3.95	40.85	7.12	178.35	70.02	2.78316
chr4	20434594	20435094	intron (NM_001289136, intron 4 of 35)	intron (NM_001289136, intron 4 of 35)	41032	NR_037876	100505893	Hs.665305	NR_037876	ENSG00000248228	SLIT2-IT1	-	SLIT2 intronic transcript 1	ncRNA	1.28	1.29	1.09	21.77	4.27	18.1	3.6	2.55659
chr6	127887184	127887684	Intergenic	Intergenic	-10885	NM_001010905	352999	Hs.226268	NM_001010905	ENSG00000184530	C6orf58	LEG1	chromosome 6 open reading frame 58	protein-coding	0.92	2.91	2.67	31.52	19.62	2.17	39	2.96376
chr9	682641	683141	intron (NM_001256877, intron 3 of 12)	intron (NM_001256877, intron 3 of 12)	-23915	NM_153186	23189	Hs.306764	NM_015158	ENSG00000107104	KANK1	ANKRD15|CPSQ2|KANK	KN motif and ankyrin repeat domains 1	protein-coding	1.65	3.4	1.88	21.98	27.06	11.14	31.95	2.85104
chr5	56731395	56731895	Intergenic	Intergenic	46991	NM_001017992	345651	Hs.482167	NM_001017992	ENSG00000169067	ACTBL2	ACT	actin, beta like 2	protein-coding	0.55	0.81	1.98	24.88	6.33	3.09	28.51	2.70253
chr15	35292596	35293096	Intergenic	MLT2F|LTR|ERVL	-12349	NM_014106	54989	Hs.744990	NM_014106	ENSG00000198146	ZNF770	PRO1914	zinc finger protein 770	protein-coding	12.84	30.58	7.41	1.66	1.74	4.8	1.88	-3.63203
chr11	27076592	27077092	intron (NR_125768, intron 3 of 3)	intron (NR_125768, intron 3 of 3)	14333	NM_003986	8424	Hs.591996	NM_003986	ENSG00000129151	BBOX1	BBH|BBOX|G-BBH|gamma-BBH	gamma-butyrobetaine hydroxylase 1	protein-coding	1.28	0.81	2.27	22.39	11.55	45.94	31.64	3.47661
chr17	16200306	16200806	intron (NM_004278, intron 2 of 6)	intron (NM_004278, intron 2 of 6)	15228	NR_031698	100302124		NR_031698	ENSG00000221355	MIR1288	MIRN1288|hsa-mir-1288	microRNA 1288	ncRNA	1.65	1.94	0.89	17.83	12.66	13.3	8.61	2.59735
chr14	56442837	56443337	Intergenic	Intergenic	-142006	NM_021255	57161	Hs.657926	NM_021255	ENSG00000139946	PELI2	-	pellino E3 ubiquitin protein ligase family member 2	protein-coding	1.47	3.4	3.56	35.87	25.16	32.18	31.33	2.53629
chrX	55237289	55237789	Intergenic	MER51A|LTR|ERV1	-9241	NM_130467	90737	Hs.668491	NM_130467	ENSG00000158639	PAGE5	CT16|CT16.1|CT16.2|GAGEE1|PAGE-5	PAGE family member 5	protein-coding	1.28	1.29	1.68	14.93	2.85	31.4	3.29	2.46607
chr2	219946665	219947165	intron (NM_024782, intron 5 of 7)	intron (NM_024782, intron 5 of 7)	-21677	NM_002181	3549	Hs.654504	NM_002181	ENSG00000163501	IHH	BDA1|HHG2	indian hedgehog	protein-coding	0.73	1.29	2.67	12.44	25.96	14.85	32.27	3.27981
chr6	85166946	85167446	intron (NR_132100, intron 3 of 4)	intron (NR_132100, intron 3 of 4)	17451	NR_132100	105377880	Hs.171384	NR_132100	ENSG00000231776	LINC01611	TCONS_l2_00025430	long intergenic non-protein coding RNA 1611	ncRNA	0.73	1.94	1.09	13.27	2.69	2.78	22.24	2.45409
chr17	25798650	25799150	promoter-TSS (NM_014238)	promoter-TSS (NM_014238)	-136	NM_014238	8844	Hs.133534	NM_014238	ENSG00000141068	KSR1	KSR|RSU2	kinase suppressor of ras 1	protein-coding	12.29	28.96	6.02	4.98	2.85	11.45	6.58	-2.40265
chr2	39731266	39731766	intron (NR_037875, intron 3 of 5)	intron (NR_037875, intron 3 of 5)	66959	NR_037875	728730	Hs.655344	NR_037875	ENSG00000231312	LOC728730	-	uncharacterized LOC728730	ncRNA	2.38	2.75	4.15	30.9	18.52	43.78	22.56	2.43288
chr11	91129660	91130160	Intergenic	Intergenic	-527540	NR_031663	100302228		NR_031663	ENSG00000221586	MIR1261	MIRN1261|hsa-mir-1261	microRNA 1261	ncRNA	0.73	2.1	1.98	15.14	9.81	12.07	22.09	2.40708
chr2	97593479	97593979	intron (NM_001122646, intron 9 of 16)	intron (NM_001122646, intron 9 of 16)	8886	NR_110209	101927053	Hs.677537	NR_110209		LOC101927053	-	uncharacterized LOC101927053	ncRNA	12.29	41.26	6.42	3.94	2.85	22.28	4.23	-2.50748
chr3	73877008	73877508	Intergenic	Intergenic	-203186	NM_015009	23024	Hs.660347	NM_015009	ENSG00000121440	PDZRN3	LNX3|SEMACAP3|SEMCAP3	PDZ domain containing ring finger 3	protein-coding	0.37	0.97	1.78	28.2	6.17	14.85	3.76	2.6627
chr8	124674115	124674615	Intergenic	Intergenic	-9175	NM_001081675	340359	Hs.450252	NM_001081675	ENSG00000175946	KLHL38	C8ORFK36	kelch like family member 38	protein-coding	17.43	32.03	4.54	2.07	1.9	7.12	1.25	-3.66699
chr3	26322672	26323172	Intergenic	L2a|LINE|L2	-341375	NM_052953	116135	Hs.517868	NM_052953	ENSG00000179796	LRRC3B	LRP15	leucine rich repeat containing 3B	protein-coding	12.66	22.65	6.32	1.45	3.64	4.8	2.66	-2.86165
chr7	97990024	97990524	intron (NM_018842, intron 2 of 13)	intron (NM_018842, intron 2 of 13)	40153	NM_018842	55971	Hs.656063	NM_018842	ENSG00000006453	BAIAP2L1	IRTKS	BAI1 associated protein 2 like 1	protein-coding	5.14	1.94	2.77	56.61	16.62	77.96	29.13	3.01609
chr2	150741854	150742354	Intergenic	Intergenic	-297774	NM_015702	27249	Hs.5324	NM_015702	ENSG00000168288	MMADHC	C2orf25|CL25022|cblD	methylmalonic aciduria and homocystinuria, cblD type	protein-coding	12.29	7.28	8.49	0.62	2.22	15.62	2.82	-2.49838
chr18	61220309	61220809	Intergenic	MIR3|SINE|MIR	-2834	NM_080474	89777	Hs.348541	NM_080474	ENSG00000166634	SERPINB12	YUKOPIN	serpin family B member 12	protein-coding	16.69	35.92	9.88	2.07	1.42	2.78	4.7	-3.6005
chr4	11733721	11734221	Intergenic	L2b|LINE|L2	-303434	NM_005114	9957	Hs.507348	NM_005114	ENSG00000002587	HS3ST1	3OST|3OST1	heparan sulfate-glucosamine 3-sulfotransferase 1	protein-coding	0.37	3.56	2.17	13.48	12.03	9.59	53.41	3.07279
chr15	60912799	60913299	intron (NM_002943, intron 1 of 10)	intron (NM_002943, intron 1 of 10)	6680	NM_002943	6095	Hs.560343	NM_002943	ENSG00000069667	RORA	NR1F1|ROR1|ROR2|ROR3|RZR-ALPHA|RZRA	RAR related orphan receptor A	protein-coding	10.82	34.3	5.23	2.7	3.01	11.6	2.19	-2.72367
chr9	37587425	37587925	TTS (NM_001001790)	TTS (NM_001001790)	4961	NM_001134485	401505	Hs.130774	NM_001001790	ENSG00000175768	TOMM5	C9orf105|Tom5|bA613M10.3	translocase of outer mitochondrial membrane 5	protein-coding	0.92	1.46	0.89	7.26	2.85	2.78	18.95	2.44698
chr2	120245145	120245645	intron (NM_002980, intron 2 of 12)	intron (NM_002980, intron 2 of 12)	36633	NM_002980	6344	Hs.42091	NM_002980	ENSG00000080293	SCTR	SR	secretin receptor	protein-coding	2.02	2.27	3.06	27.79	14.72	25.37	10.96	2.69372
chr3	166547688	166548188	Intergenic	Intergenic	-68533	NR_135545	105374194		NR_135545		LOC105374194	inv3q26.1	uncharacterized LOC105374194	ncRNA	1.28	1.46	1.48	10.58	6.17	3.56	10.96	2.50595
chr20	51953851	51954351	intron (NM_001193421, intron 2 of 2)	intron (NM_001193421, intron 2 of 2)	152279	NM_001193421	128553	Hs.473117	NM_173485	ENSG00000182463	TSHZ2	C20orf17|OVC10-2|TSH2|ZABC2|ZNF218	teashirt zinc finger homeobox 2	protein-coding	1.65	0.97	2.57	6.43	3.96	196.92	1.1	2.83942
chr4	85873093	85873593	intron (NM_014991, intron 1 of 67)	intron (NM_014991, intron 1 of 67)	14201	NM_014991	23001	Hs.480116	NM_014991	ENSG00000163625	WDFY3	ALFY|ZFYVE25	WD repeat and FYVE domain containing 3	protein-coding	5.5	22.65	5.43	1.45	2.85	4.64	4.39	-2.38588
chr19	57350508	57351008	intron (NM_015363, intron 1 of 10)	intron (NM_015363, intron 1 of 10)	1336	NM_001146185	5178	Hs.731875	NM_006210	ENSG00000198300	PEG3	PW1|ZKSCAN22|ZNF904|ZSCAN24	paternally expressed 3	protein-coding	26.6	74.26	7.51	6.43	0.63	7.12	7.36	-3.7879
chr9	27371332	27371832	intron (NM_024761, intron 2 of 3)	intron (NM_024761, intron 2 of 3)	-74445	NM_020641	54586	Hs.163070	NM_020641	ENSG00000120160	EQTN	AFAF|C9orf11|SPACA8	equatorin	protein-coding	4.95	6.15	3.36	41.26	32.76	15.93	40.88	2.85735
chr3	175991933	175992433	Intergenic	MLT2B3|LTR|ERVL	-240708	NR_107017	102465858		NR_107017	ENSG00000283333	MIR7977	hsa-mir-7977	microRNA 7977	ncRNA	7.89	14.08	6.02	1.24	1.27	10.05	1.1	-2.7279
chr20	42930749	42931249	TTS (NM_001080472)	TTS (NM_001080472)	8893	NM_001080472	128486	Hs.632269	NM_001080472	ENSG00000197296	FITM2	C20orf142|Fit2|dJ881L22.2	fat storage inducing transmembrane protein 2	protein-coding	1.47	3.24	1.38	38.98	3.64	65.59	5.17	2.67575
chr7	80499250	80499750	intron (NM_006379, intron 2 of 17)	intron (NM_006379, intron 2 of 17)	49167	NM_006379	10512	Hs.269109	NM_006379	ENSG00000075223	SEMA3C	SEMAE|SemE	semaphorin 3C	protein-coding	1.1	1.94	1.19	20.94	9.18	23.98	5.33	2.74836
chr16	18973626	18974126	Intergenic	Intergenic	-21380	NM_001324265	79905	Hs.187377	NM_024847	ENSG00000170537	TMC7	-	transmembrane channel like 7	protein-coding	8.62	22.16	4.64	1.45	2.06	6.96	4.39	-2.75636
chr14	38678097	38678597	5' UTR (NM_001049, exon 3 of 3)	5' UTR (NM_001049, exon 3 of 3)	1143	NM_001049	6751	Hs.248160	NM_001049	ENSG00000139874	SSTR1	SRIF-2|SS-1-R|SS1-R|SS1R	somatostatin receptor 1	protein-coding	6.24	9.22	4.84	65.94	41.15	71.16	59.99	2.54695
chr9	124291914	124292414	Intergenic	Intergenic	-29858	NR_003191	2681	Hs.97469	NR_003191	ENSG00000204136	GGTA1P	GGTA|GGTA1|GLYT2|a1/3GTP	glycoprotein, alpha-galactosyltransferase 1 pseudogene	pseudo	12.11	20.39	7.6	1.45	1.42	16.55	2.98	-2.63261
chr1	177939014	177939514	promoter-TSS (NM_033127)	promoter-TSS (NM_033127)	-214	NM_033127	89866	Hs.149540	NM_033127	ENSG00000120341	SEC16B	LZTR2|PGPR-p117|RGPR|SEC16S	SEC16 homolog B, endoplasmic reticulum export factor	protein-coding	4.77	3.24	3.85	83.15	31.65	102.09	52.16	3.21809
chr13	63203728	63204228	Intergenic	LTR47A|LTR|ERVL	166847	NR_120404	100874176	Hs.402083	NR_047029		LINC00448	-	long intergenic non-protein coding RNA 448	ncRNA	0.55	1.13	1.19	9.75	8.7	4.49	7.99	3.24379
chr3	193603503	193604003	Intergenic	MER50|LTR|ERV1	108274	NR_027764	100128023	Hs.730112	NR_027764		DPPA2P3	-	developmental pluripotency associated 2 pseudogene 3	pseudo	3.12	5.99	2.07	8.29	29.91	26.14	31.33	2.37014
chr4	161046812	161047312	Intergenic	L1PA3|LINE|L1	858064	NM_014247	9693	Hs.744884	NM_014247	ENSG00000109756	RAPGEF2	CNrasGEF|NRAPGEP|PDZ-GEF1|PDZGEF1|RA-GEF|RA-GEF-1|Rap-GEP|nRap GEP	Rap guanine nucleotide exchange factor 2	protein-coding	1.65	0.97	1.58	65.94	1.27	40.68	19.11	2.93848
chr7	90038930	90039430	intron (NM_001185073, intron 2 of 2)	L2a|LINE|L2	6532	NM_012129	9069	Hs.731917	NM_012129	ENSG00000157224	CLDN12	-	claudin 12	protein-coding	2.93	2.1	1.88	80.87	6.96	8.66	8.77	2.81282
chr18	6476830	6477330	Intergenic	Intergenic	-34335	NR_120518	100130480	Hs.646267	NM_001243517	ENSG00000265944	LINC01387	C18orf64	long intergenic non-protein coding RNA 1387	ncRNA	15.59	32.52	4.94	1.87	2.69	3.25	1.72	-3.55955
chr11	77226411	77226911	Intergenic	Intergenic	-41553	NM_001128620	5058	Hs.435714	NM_002576	ENSG00000149269	PAK1	PAKalpha	p21 (RAC1) activated kinase 1	protein-coding	1.65	0.65	1.19	16.8	10.92	14.85	7.99	2.55218
chr2	128212656	128213156	Intergenic	Intergenic	-31712	NR_039944	100616187		NR_039944	ENSG00000264075	MIR4783	-	microRNA 4783	ncRNA	2.93	1.94	1.68	44.58	25.01	76.73	24.59	3.114
chrX	36037251	36037751	intron (NM_001304548, intron 22 of 63)	LTR22B|LTR|ERVK	99650	NM_001304548	286464	Hs.376425	NM_152632	ENSG00000165164	CFAP47	CHDC2|CXorf22|CXorf30|CXorf59	cilia and flagella associated protein 47	protein-coding	0.73	2.27	0.69	19.08	7.44	23.51	9.87	2.99145
chr3	49624917	49625417	intron (NM_003458, intron 1 of 11)	MER51A|LTR|ERV1	33245	NM_003458	8927	Hs.194684	NM_003458	ENSG00000164061	BSN	ZNF231	bassoon presynaptic cytomatrix protein	protein-coding	2.57	2.91	1.19	12.44	4.75	33.1	20.05	2.33927
chr6	55145970	55146470	intron (NM_001526, intron 6 of 6)	intron (NM_001526, intron 6 of 6)	-46047	NM_207410	389400	Hs.526967	NM_207410	ENSG00000187871	GFRAL	C6orf144|GRAL|UNQ9356|bA360D14.1	GDNF family receptor alpha like	protein-coding	0.37	0.97	1.48	11.2	6.17	15.31	4.7	2.53748
chr11	92586089	92586589	intron (NM_001008781, intron 18 of 24)	MER52A|LTR|ERV1	62455	NR_135091	105369431	Hs.532389	NR_135091		LOC105369431	-	uncharacterized LOC105369431	ncRNA	19.63	51.61	15.51	3.94	6.96	8.2	4.7	-2.97663
chr1	24611676	24612176	Intergenic	Intergenic	-33886	NM_198173	57822	Hs.657920	NM_021180	ENSG00000158055	GRHL3	SOM|TFCP2L4|VWS2	grainyhead like transcription factor 3	protein-coding	17.43	35.27	9.09	0.83	2.85	5.72	3.45	-3.78097
chr8	125868908	125869408	Intergenic	Intergenic	-34858	NR_039809	100616255		NR_039809	ENSG00000263735	MIR4662B	-	microRNA 4662b	ncRNA	21.83	42.39	12.05	1.66	4.75	9.59	2.04	-3.50585
chr3	177012883	177013383	intron (NR_047465, intron 1 of 1)	intron (NR_047465, intron 1 of 1)	903	NR_047465	100820709	Hs.518409	NR_047465	ENSG00000203645	LINC00501	-	long intergenic non-protein coding RNA 501	ncRNA	4.04	2.43	2.27	40.23	32.92	28.31	26.78	2.68583
chr11	9532269	9532769	intron (NM_003442, intron 12 of 15)	intron (NM_003442, intron 12 of 15)	50007	NM_001282656	7702	Hs.523471	NM_003442	ENSG00000166478	ZNF143	SBF|STAF|pHZ-1	zinc finger protein 143	protein-coding	1.1	1.78	0.2	10.58	9.34	20.73	19.42	2.73959
chr2	47536995	47537495	intron (NR_110207, intron 1 of 2)	intron (NR_110207, intron 1 of 2)	34968	NR_110207	101927043	Hs.515976	NR_110207	ENSG00000234690	LOC101927043	-	uncharacterized LOC101927043	ncRNA	4.22	2.27	2.67	55.57	25.64	64.66	19.11	2.88233
chr6	148030506	148031006	Intergenic	Intergenic	200928	NM_001030060	389432	Hs.567973	NM_001030060	ENSG00000203727	SAMD5	dJ875H10.1	sterile alpha motif domain containing 5	protein-coding	0.73	1.94	2.57	15.34	18.52	6.5	30.7	2.68404
chr6	45581348	45581848	Intergenic	Intergenic	191284	NM_001278478	860	Hs.535845	NM_004348	ENSG00000124813	RUNX2	AML3|CBF-alpha-1|CBFA1|CCD|CCD1|CLCD|OSF-2|OSF2|PEA2aA|PEBP2aA	runt related transcription factor 2	protein-coding	16.33	23.46	5.33	2.07	1.9	12.07	3.29	-2.63175
chr1	80211549	80212049	Intergenic	Tigger1|DNA|TcMar-Tigger	-739304	NM_022159	64123	Hs.132314	NM_022159	ENSG00000162618	ADGRL4	ELTD1|ETL|KPG_003	adhesion G protein-coupled receptor L4	protein-coding	0.37	0.81	1.28	5.81	4.27	1.55	20.52	2.97346
chr5	168591458	168591958	intron (NM_003062, intron 4 of 35)	intron (NM_003062, intron 4 of 35)	98990	NR_030311	693170		NR_030311	ENSG00000207619	MIR585	MIRN585|hsa-mir-585|mir-585	microRNA 585	ncRNA	14.31	31.71	7.51	3.73	2.69	11.6	4.07	-2.60271
chr1	236057121	236057621	Intergenic	MIRc|SINE|MIR	-10363	NM_001301365	1130	Hs.532411	NM_000081	ENSG00000143669	LYST	CHS|CHS1	lysosomal trafficking regulator	protein-coding	0.55	0.81	0.99	10.16	6.81	6.81	13.94	2.7341
chr2	192093537	192094037	Intergenic	Intergenic	-16215	NM_001130158	4430	Hs.439620	NM_012223	ENSG00000128641	MYO1B	MMI-alpha|MMIa|MYH-1c|myr1	myosin IB	protein-coding	12.66	23.62	8.69	1.45	2.53	1.24	3.92	-3.55573
chr2	25407047	25407547	Intergenic	L2a|LINE|L2	-15577	NM_001319204	5443	Hs.1897	NM_000939	ENSG00000115138	POMC	ACTH|CLIP|LPH|MSH|NPP|POC	proopiomelanocortin	protein-coding	10.27	28.96	6.72	1.24	4.11	13.77	2.04	-2.58923
chr4	104917720	104918220	Intergenic	Intergenic	-276997	NM_001059	6870	Hs.942	NM_001059	ENSG00000169836	TACR3	HH11|NK-3R|NK3R|NKR|TAC3RL	tachykinin receptor 3	protein-coding	11.01	18.77	6.22	4.56	1.74	6.96	1.57	-2.75442
chr10	71145116	71145616	intron (NM_001322365, intron 17 of 22)	intron (NM_001322365, intron 17 of 22)	31308	NM_001057	6865	Hs.88372	NM_001057	ENSG00000075073	TACR2	NK2R|NKNAR|SKR|TAC2R	tachykinin receptor 2	protein-coding	22.2	42.87	6.81	1.45	1.9	29.55	3.76	-3.00965
chr3	37271117	37271617	Intergenic	Intergenic	-13315	NM_002078	2803	Hs.344151	NM_002078	ENSG00000144674	GOLGA4	CRPF46|GCP2|GOLG|MU-RMS-40.18|p230	golgin A4	protein-coding	1.47	1.94	1.19	20.11	17.41	44.86	30.7	3.29741
chr3	111329367	111329867	intron (NM_005816, intron 8 of 13)	intron (NM_005816, intron 8 of 13)	-15435	NM_024508	79413	Hs.136912	NM_024508	ENSG00000177494	ZBED2	-	zinc finger BED-type containing 2	protein-coding	25.86	30.9	8.99	2.28	3.8	3.4	4.86	-3.59799
chr7	98013384	98013884	intron (NM_018842, intron 1 of 13)	intron (NM_018842, intron 1 of 13)	16793	NM_018842	55971	Hs.656063	NM_018842	ENSG00000006453	BAIAP2L1	IRTKS	BAI1 associated protein 2 like 1	protein-coding	1.65	0.81	0.99	98.7	14.88	14.23	31.17	4.80008
chr8	8547246	8547746	Intergenic	Intergenic	-12170	NM_194284	137075	Hs.183617	NM_194284	ENSG00000253958	CLDN23	CLDNL|hCG1646163	claudin 23	protein-coding	1.65	1.13	1.88	41.06	12.98	8.51	4.07	2.50021
chr11	69846463	69846963	Intergenic	L1ME3A|LINE|L1	63317	NR_120530	101928443	Hs.313468	NR_120529	ENSG00000248844	LOC101928443	-	uncharacterized LOC101928443	ncRNA	2.2	1.78	1.88	21.57	23.9	4.8	17.7	2.84021
chr17	27025288	27025788	intron (NM_001320755, intron 33 of 37)	intron (NM_001320755, intron 33 of 37)	12571	NM_001304952	147011	Hs.207471	NM_152465	ENSG00000167525	PROCA1	-	protein interacting with cyclin A1	protein-coding	5.32	5.66	3.16	39.19	20.1	95.13	25.84	2.35308
chr1	207115074	207115574	intron (NM_002644, intron 1 of 10)	intron (NM_002644, intron 1 of 10)	4487	NM_002644	5284	Hs.497589	NM_002644	ENSG00000162896	PIGR	-	polymeric immunoglobulin receptor	protein-coding	3.67	3.88	1.38	39.19	20.42	36.82	33.05	2.69041
chr18	72148176	72148676	Intergenic	Intergenic	-15074	NM_018235	55748	Hs.149185	NM_018235	ENSG00000133313	CNDP2	CN2|CPGL|HEL-S-13|HsT2298|PEPA	CNDP dipeptidase 2 (metallopeptidase M20 family)	protein-coding	1.65	1.29	1.09	12.44	12.82	12.99	27.25	3.24884
chr14	95935071	95935571	intron (NM_152592, intron 1 of 16)	MIR|SINE|MIR	6852	NM_152592	161176	Hs.41502	NM_024633	ENSG00000176438	SYNE3	C14orf139|C14orf49|LINC00341|NCRNA00341|NET53|Nesp3	spectrin repeat containing nuclear envelope family member 3	protein-coding	2.75	3.07	1.98	32.76	15.51	29.85	20.52	3.18371
chr13	55211467	55211967	Intergenic	Intergenic	-325534	NR_031628	100302187		NR_031628	ENSG00000283126	MIR1297	MIRN1297|hsa-mir-1297|mir-1297	microRNA 1297	ncRNA	1.65	0.65	1.88	19.28	5.7	14.7	7.36	2.34544
chr2	202013811	202014311	intron (NR_040030, intron 4 of 6)	intron (NR_040030, intron 4 of 6)	8454	NR_040030	65072	Hs.664613	NR_040030	ENSG00000226312	CFLAR-AS1	ALS2CR10	CFLAR antisense RNA 1	ncRNA	1.83	1.29	1.98	12.65	15.19	22.89	33.21	2.76354
chr3	142332280	142332780	intron (NM_001145319, intron 1 of 15)	intron (NM_001145319, intron 1 of 15)	-9736	NM_002670	5357	Hs.203637	NM_002670	ENSG00000120756	PLS1	-	plastin 1	protein-coding	1.1	0.81	1.09	9.75	8.55	21.81	2.04	2.78431
chr6	74119061	74119561	intron (NM_018665, intron 10 of 16)	intron (NM_018665, intron 10 of 16)	15026	NM_018665	55510	Hs.125507	NM_018665	ENSG00000080007	DDX43	CT13|HAGE	DEAD-box helicase 43	protein-coding	1.65	0.97	1.48	17	12.34	9.13	26.78	2.83389
chr14	69014781	69015281	intron (NM_001321818, intron 10 of 10)	(CAGCC)n|Simple_repeat|Simple_repeat	80473	NR_135816	100996664		NR_135816		LOC100996664	-	uncharacterized LOC100996664	ncRNA	16.14	41.09	7.21	6.01	2.85	9.44	10.49	-2.61208
chr3	71421467	71421967	intron (NM_001012505, intron 3 of 6)	L2c|LINE|L2	-67806	NM_001244812	27086	Hs.59368	NM_032682	ENSG00000114861	FOXP1	12CC4|HSPC215|MFH|QRF1|hFKH1B	forkhead box P1	protein-coding	1.1	2.1	1.78	17.42	10.45	34.19	6.89	2.43581
chr7	90350204	90350704	intron (NM_001287137, intron 1 of 12)	intron (NM_001287137, intron 1 of 12)	11324	NM_001287136	5218	Hs.258576	NM_012395	ENSG00000058091	CDK14	PFTAIRE1|PFTK1	cyclin dependent kinase 14	protein-coding	1.1	1.29	1.38	33.59	12.98	17.17	7.36	3.03523
chr20	50361047	50361547	intron (NM_006045, intron 1 of 27)	intron (NM_006045, intron 1 of 27)	23653	NM_006045	10079	Hs.649234	NM_006045	ENSG00000054793	ATP9A	ATPIIA	ATPase phospholipid transporting 9A (putative)	protein-coding	3.3	5.02	2.17	29.24	34.19	92.97	46.83	2.98009
chr2	201242540	201243040	intron (NM_001282743, intron 2 of 11)	intron (NM_001282743, intron 2 of 11)	69117	NM_001282744	26010	Hs.120323	NM_015535	ENSG00000196141	SPATS2L	DNAPTP6|SGNP	spermatogenesis associated serine rich 2 like	protein-coding	4.4	4.04	3.16	50.8	29.44	17.48	59.52	2.98835
chr8	9066378	9066878	Intergenic	Intergenic	20119	NR_125431	101929128		NR_125431	ENSG00000248538	LOC101929128	-	uncharacterized LOC101929128	ncRNA	2.57	2.1	1.88	58.47	3.17	19.03	1.88	2.4619
chr1	237963072	237963572	intron (NM_001035, intron 97 of 104)	intron (NM_001035, intron 97 of 104)	-62153	NR_027247	100130331	Hs.661736	NR_027247	ENSG00000237250	LOC100130331	-	POTE ankyrin domain family, member F pseudogene	pseudo	2.93	1.62	2.77	23.22	10.45	40.99	34.93	2.34198
chr11	76797943	76798443	intron (NM_004055, intron 2 of 12)	intron (NM_004055, intron 2 of 12)	-15693	NM_006189	4975	Hs.673853	NM_006189	ENSG00000254550	OMP	-	olfactory marker protein	protein-coding	6.6	7.12	5.23	163.6	34.66	92.04	81.45	2.43906
chr16	23290899	23291399	Intergenic	Intergenic	-22442	NM_000336	6338	Hs.414614	NM_000336	ENSG00000168447	SCNN1B	BESC1|ENaCb|ENaCbeta|SCNEB	sodium channel epithelial 1 beta subunit	protein-coding	20.54	25.56	5.93	1.24	2.37	8.51	1.88	-3.56799
chr4	48605348	48605848	intron (NM_015030, intron 11 of 63)	intron (NM_015030, intron 11 of 63)	113329	NM_175619	326340	Hs.276457	NM_175619	ENSG00000182223	ZAR1	Z3CXXC6	zygote arrest 1	protein-coding	0.73	1.29	1.78	10.99	11.24	24.9	22.56	3.28511
chr20	52701448	52701948	Intergenic	Intergenic	-14394	NM_001316361	8537	Hs.400556	NM_003657	ENSG00000064787	BCAS1	AIBC1|NABC1	breast carcinoma amplified sequence 1	protein-coding	3.49	4.53	2.07	10.58	13.29	89.87	33.68	2.37932
chr3	160385229	160385729	Intergenic	L2b|LINE|L2	-9469	NM_025047	80117	Hs.287702	NM_025047	ENSG00000179674	ARL14	ARF7	ADP ribosylation factor like GTPase 14	protein-coding	1.83	1.46	2.17	34.84	20.57	31.4	9.55	2.99117
chr3	3741842	3742342	Intergenic	Intergenic	-99023	NM_001324189	57633	Hs.163244	NM_020873	ENSG00000175928	LRRN1	FIGLER3|NLRR-1	leucine rich repeat neuronal 1	protein-coding	0.73	0.32	1.28	13.48	3.32	8.51	12.53	2.34271
chr3	133473230	133473730	exon (NM_001063, exon 4 of 17)	exon (NM_001063, exon 4 of 17)	8503	NM_001063	7018	Hs.518267	NM_001063	ENSG00000091513	TF	HEL-S-71p|PRO1557|PRO2086|TFQTL1	transferrin	protein-coding	19.44	45.62	11.65	1.87	3.32	3.4	2.04	-4.25436
chr12	89769364	89769864	Intergenic	Intergenic	-22978	NM_022652	1848	Hs.298654	NM_001946	ENSG00000139318	DUSP6	HH19|MKP3|PYST1	dual specificity phosphatase 6	protein-coding	4.95	8.9	3.75	35.04	30.86	75.8	67.2	2.73196
chr11	67713771	67714271	Intergenic	Intergenic	57574	NM_030930	81622	Hs.502989	NM_030930	ENSG00000110057	UNC93B1	IIAE1|UNC93|UNC93B|Unc-93B1	unc-93 homolog B1 (C. elegans)	protein-coding	2.2	1.78	1.58	31.73	8.39	17.63	10.81	2.78522
chr6	129822506	129823006	intron (NM_000426, intron 58 of 64)	intron (NM_000426, intron 58 of 64)	208614	NM_033515	93663	Hs.486458	NM_033515	ENSG00000146376	ARHGAP18	MacGAP|SENEX|bA307O14.2	Rho GTPase activating protein 18	protein-coding	8.25	18.12	6.22	3.11	2.22	6.19	3.6	-2.68251
chr19	41672969	41673469	Intergenic	Intergenic	-25893	NM_030622	29785	Hs.98370	NM_030622	ENSG00000167600	CYP2S1	CYPIIS1	cytochrome P450 family 2 subfamily S member 1	protein-coding	1.65	0.49	1.88	8.5	20.26	19.65	16.76	3.10524
chr19	39768159	39768659	Intergenic	Intergenic	9252	NM_172138	282616	Hs.567792	NM_172138	ENSG00000183709	IFNL2	IL-28A|IL28A	interferon lambda 2	protein-coding	0.37	1.94	2.07	9.75	3.17	36.66	2.04	2.37397
chr15	52542644	52543144	intron (NM_018728, intron 13 of 40)	intron (NM_018728, intron 13 of 40)	26503	NR_031670	100302202		NR_031670	ENSG00000221052	MIR1266	MIRN1266|hsa-mir-1266|mir-1266	microRNA 1266	ncRNA	2.38	1.94	4.05	22.19	11.4	23.98	68.92	2.57059
chr19	55700643	55701143	intron (NM_001161440, intron 10 of 17)	L2a|LINE|L2	-9173	NM_003180	6861	Hs.631566	NM_003180	ENSG00000129990	SYT5	-	synaptotagmin 5	protein-coding	12.84	53.07	8.39	2.07	5.7	10.05	6.58	-2.80583
chrY	22031532	22032032	Intergenic	Intergenic	-124957	NM_001146705	8284	Hs.80358	NM_004653	ENSG00000012817	KDM5D	HY|HYA|JARID1D|SMCY	lysine demethylase 5D	protein-coding	1.83	0	0.99	25.3	0.63	0	14.41	2.58419
chr6	56264312	56264812	Intergenic	LTR22|LTR|ERVK	-5636	NM_001318752	81578	Hs.47629	NM_030820	ENSG00000124749	COL21A1	COLA1L|FP633	collagen type XXI alpha 1 chain	protein-coding	0.73	1.13	1.68	30.48	5.22	21.66	10.02	2.6873
chr11	85498785	85499285	intron (NM_032943, intron 1 of 18)	intron (NM_032943, intron 1 of 18)	23167	NM_032943	54843	Hs.369520	NM_032379	ENSG00000137501	SYTL2	CHR11SYT|EXO4|PPP1R151|SGA72M|SLP2|SLP2A	synaptotagmin like 2	protein-coding	2.38	2.59	1.09	21.98	16.14	39.91	39.32	3.0479
chr8	4195697	4196197	intron (NM_033225, intron 3 of 69)	intron (NM_033225, intron 3 of 69)	656381	NM_033225	64478	Hs.571466	NM_033225	ENSG00000183117	CSMD1	PPP1R24	CUB and Sushi multiple domains 1	protein-coding	0.73	0.97	1.58	46.45	30.55	11.29	45.74	4.14991
chr1	60234391	60234891	Intergenic	Intergenic	-3826	NR_110627	101926944	Hs.720353	NR_110627		LOC101926944	-	uncharacterized LOC101926944	ncRNA	12.47	38.83	8.3	2.49	4.11	2.63	9.4	-2.64042
chr20	14966635	14967135	intron (NM_080676, intron 5 of 16)	intron (NM_080676, intron 5 of 16)	-56721	NR_037841	100379174	Hs.407533	NR_037841	ENSG00000235914	MACROD2-AS1	BA318C17.1|NCRNA00186	MACROD2 antisense RNA 1	ncRNA	2.93	2.59	1.68	19.91	49.85	19.8	14.1	2.82966
chr11	100646821	100647321	intron (NM_152432, intron 2 of 23)	intron (NM_152432, intron 2 of 23)	-88385	NR_133571	100128386	Hs.635125	NR_133571	ENSG00000248027	LOC100128386	-	uncharacterized LOC100128386	ncRNA	3.3	2.43	1.88	20.53	31.34	29.85	87.25	3.21217
chr2	3251098	3251598	intron (NM_001330531, intron 3 of 7)	intron (NM_001330531, intron 3 of 7)	-121550	NR_110228	101927554	Hs.638446	NR_110228	ENSG00000234423	LINC01250	-	long intergenic non-protein coding RNA 1250	ncRNA	0.55	3.24	1.78	25.5	6.81	33.57	8.3	2.67308
chr1	185554851	185555351	intron (NR_110793, intron 2 of 3)	LTR22C|LTR|ERVK	42519	NR_110793	101929093	Hs.535227	NR_110793	ENSG00000228309	LINC01350	GS1-204I12.1	long intergenic non-protein coding RNA 1350	ncRNA	0.73	0.65	1.28	12.03	21.52	6.03	3.6	2.87968
chr17	64382983	64383483	intron (NM_002737, intron 2 of 16)	intron (NM_002737, intron 2 of 16)	29739	NR_110822	101928001	Hs.650730	NR_110822		PRKCA-AS1	-	PRKCA antisense RNA 1	ncRNA	1.83	6.63	1.78	39.4	15.51	45.17	31.33	2.51743
chr8	49621564	49622064	Intergenic	Intergenic	26056	NM_001142857	79645	Hs.23245	NM_024593	ENSG00000034239	EFCAB1	-	EF-hand calcium binding domain 1	protein-coding	16.33	32.2	6.81	4.35	2.22	26.76	2.04	-2.59497
chr19	36640852	36641352	TTS (NM_001864)	TTS (NM_001864)	2669	NM_001864	1346	Hs.421621	NM_001864	ENSG00000161281	COX7A1	COX7A|COX7AH|COX7AM	cytochrome c oxidase subunit 7A1	protein-coding	19.99	39.96	10.57	3.53	3.64	7.12	6.58	-3.25818
chr14	68008472	68008972	intron (NM_020715, intron 2 of 28)	intron (NM_020715, intron 2 of 28)	8714	NM_020715	57475	Hs.594236	NM_020715	ENSG00000054690	PLEKHH1	-	pleckstrin homology, MyTH4 and FERM domain containing H1	protein-coding	1.28	4.37	1.58	27.99	12.82	57.08	20.36	3.16022
chr18	9688213	9688713	Intergenic	Intergenic	-19765	NM_006868	11031	Hs.99528	NM_006868	ENSG00000168461	RAB31	Rab22B	RAB31, member RAS oncogene family	protein-coding	11.01	25.72	8.99	2.07	1.9	12.53	3.13	-2.92194
chr5	8861851	8862351	intron (NR_109932, intron 1 of 2)	MLT1I|LTR|ERVL-MaLR	22257	NR_109932	101929284	Hs.403715	NR_109932		LOC101929284	-	uncharacterized LOC101929284	ncRNA	0.73	0.32	1.19	14.72	5.7	11.45	1.25	2.46702
chr12	78287636	78288136	intron (NM_014903, intron 1 of 38)	intron (NM_014903, intron 1 of 38)	62817	NM_014903	89795	Hs.655301	NM_014903	ENSG00000067798	NAV3	POMFIL1|STEERIN3|unc53H3	neuron navigator 3	protein-coding	0.92	1.62	1.58	12.65	8.23	4.33	14.41	2.37552
chr4	11531272	11531772	Intergenic	Intergenic	-100985	NM_005114	9957	Hs.507348	NM_005114	ENSG00000002587	HS3ST1	3OST|3OST1	heparan sulfate-glucosamine 3-sulfotransferase 1	protein-coding	1.1	0.97	2.07	12.23	23.11	11.45	16.6	2.85834
chr13	80435865	80436365	Intergenic	Intergenic	-10606	NR_120413	101927195	Hs.342412	NR_120413	ENSG00000229175	LINC00382	TCONS_00021500	long intergenic non-protein coding RNA 382	ncRNA	1.47	1.62	1.48	13.48	8.23	5.72	17.54	2.75298
chr8	129567168	129567668	intron (NR_121672, intron 2 of 7)	intron (NR_121672, intron 2 of 7)	9507	NR_121673	101927774	Hs.628730	NR_121672		LINC00824	LINC01263	long intergenic non-protein coding RNA 824	ncRNA	5.32	13.59	4.74	40.02	39.41	203.72	73.93	2.56652
chr3	181568770	181569270	Intergenic	Intergenic	-101132	NR_104146	100996490	Hs.606987	NR_104146	ENSG00000242512	LINC01206	-	long intergenic non-protein coding RNA 1206	ncRNA	0.18	0.65	1.28	4.15	6.17	7.43	16.45	3.17725
chr9	74909405	74909905	Intergenic	Intergenic	-10697	NR_110952	100507540	Hs.54957	NR_110952	ENSG00000225434	LINC01504	-	long intergenic non-protein coding RNA 1504	ncRNA	1.83	0.81	0.99	16.59	13.45	19.03	19.89	3.08841
chr19	37464139	37464639	intron (NM_001204839, intron 5 of 8)	CpG	57158	NM_001204836	374900	Hs.404220	NM_198539	ENSG00000198453	ZNF568	-	zinc finger protein 568	protein-coding	16.51	30.58	9.09	5.18	4.27	10.21	3.29	-2.63441
chr3	184208752	184209252	Intergenic	Intergenic	65704	NR_046593	100874079	Hs.574899	NR_046593	ENSG00000230215	LINC01840	EIF2B5-AS1	long intergenic non-protein coding RNA 1840	ncRNA	3.12	4.37	4.05	63.87	23.11	35.11	20.36	2.38326
chrY	8688021	8688521	Intergenic	Intergenic	-2848	NR_001548	83866	Hs.122396	NR_001548	ENSG00000180910	TTTY11	NCRNA00134|TTY11	testis-specific transcript, Y-linked 11 (non-protein coding)	ncRNA	0.37	0	0.59	15.34	24.69	0	12.37	4.61475
chr12	122478472	122478972	intron (NM_001024808, intron 3 of 5)	intron (NM_001024808, intron 3 of 5)	18930	NM_001024808	605	Hs.530970	NM_020993	ENSG00000110987	BCL7A	BCL7	BCL tumor suppressor 7A	protein-coding	3.67	3.4	2.47	22.6	9.81	84.15	30.23	2.52977
chr4	173647123	173647623	intron (NR_125894, intron 1 of 2)	LTR22B|LTR|ERVK	656	NR_125894	101928314	Hs.566023	NR_125894		LOC101928314	-	uncharacterized LOC101928314	ncRNA	0.37	0.97	2.27	27.37	8.23	25.52	5.48	2.69504
chr4	176872907	176873407	intron (NR_048571, intron 1 of 5)	MLT2D|LTR|ERVL	50685	NM_005277	2823	Hs.75819	NM_005277	ENSG00000150625	GPM6A	GPM6|M6A	glycoprotein M6A	protein-coding	4.22	1.13	2.17	26.75	12.5	6.19	22.09	2.37205
chr4	155428208	155428708	Intergenic	AluJb|SINE|Alu	-15581	NM_001142552	54798	Hs.655664	NM_017639	ENSG00000197410	DCHS2	CDH27|CDHJ|CDHR7|PCDH23|PCDHJ	dachsous cadherin-related 2	protein-coding	12.66	20.39	6.72	3.32	0.95	12.68	3.92	-2.64981
chr12	90026489	90026989	intron (NM_001001323, intron 4 of 20)	intron (NM_001001323, intron 4 of 20)	23105	NM_001682	490	Hs.506276	NM_001682	ENSG00000070961	ATP2B1	PMCA1|PMCA1kb	ATPase plasma membrane Ca2+ transporting 1	protein-coding	1.28	0.65	2.27	8.92	12.34	14.39	16.76	2.41784
chr14	65693848	65694348	Intergenic	Intergenic	-5033	NR_103769	100128233	Hs.497323	NR_103769	ENSG00000255002	LOC100128233	-	uncharacterized LOC100128233	ncRNA	3.49	7.28	3.46	23.02	27.06	101.78	90.53	2.928
chr7	73121532	73122032	intron (NM_001165903, intron 3 of 9)	intron (NM_001165903, intron 3 of 9)	-3865	NR_036247	100422948		NR_036247	ENSG00000265724	MIR4284	mir-4284	microRNA 4284	ncRNA	8.62	11.81	3.56	53.08	16.3	117.41	66.73	2.40332
chr9	92300989	92301489	intron (NR_024280, intron 3 of 5)	intron (NR_024280, intron 3 of 5)	46541	NR_024280	100129066	Hs.125947	NR_024280	ENSG00000237372	UNQ6494	-	uncharacterized LOC100129066	ncRNA	10.46	23.78	8.49	2.7	1.27	29.7	2.51	-2.39839
chr20	50199732	50200232	Intergenic	Intergenic	-20612	NM_001258294	4773	Hs.744148	NM_012340	ENSG00000101096	NFATC2	NFAT1|NFATP	nuclear factor of activated T-cells 2	protein-coding	4.22	2.27	2.27	41.26	4.59	115.71	15.04	2.63087
chr1	208382650	208383150	intron (NM_025179, intron 3 of 31)	intron (NM_025179, intron 3 of 31)	34765	NM_025179	5362	Hs.497626	NM_025179	ENSG00000076356	PLXNA2	OCT|PLXN2	plexin A2	protein-coding	20.54	42.55	8.59	2.7	4.11	3.56	7.36	-3.05501
chr1	68225645	68226145	intron (NM_018841, intron 2 of 3)	intron (NM_018841, intron 2 of 3)	-72076	NR_040077	100289178	Hs.677603	NR_040077	ENSG00000232284	GNG12-AS1	-	GNG12 antisense RNA 1	ncRNA	5.69	5.34	3.75	33.38	29.12	81.06	46.21	2.57402
chrX	122782265	122782765	intron (NM_001081550, intron 12 of 38)	L1PA7|LINE|L1	84389	NM_001081550	57187	Hs.149991	NM_020449	ENSG00000125676	THOC2	CXorf3|MRX12|MRX35|THO2|dJ506G2.1|hTREX120	THO complex 2	protein-coding	0.92	5.99	0.69	16.17	8.07	67.91	26.94	2.88487
chr16	84603178	84603678	intron (NM_021149, intron 3 of 3)	intron (NM_021149, intron 3 of 3)	48274	NM_021149	23406	Hs.289092	NM_021149	ENSG00000103187	COTL1	CLP	coactosin like F-actin binding protein 1	protein-coding	2.93	2.1	2.17	25.5	16.46	14.54	30.86	2.46594
chr6	51204448	51204948	Intergenic	Intergenic	-281970	NR_125840	101927082	Hs.730296	NR_125840		LOC101927082	-	uncharacterized LOC101927082	ncRNA	19.63	27.67	6.22	3.11	2.53	2.63	3.45	-3.75832
chr10	77561977	77562477	intron (NM_032024, intron 1 of 5)	intron (NM_032024, intron 1 of 5)	19708	NM_032024	83938	Hs.118161	NM_032024	ENSG00000148655	C10orf11	CDA017	chromosome 10 open reading frame 11	protein-coding	0.55	0.65	1.88	18.45	7.28	18.56	8.93	2.62421
chr4	175547606	175548106	Intergenic	Intergenic	-103807	NM_000860	3248	Hs.596913	NM_000860	ENSG00000164120	HPGD	15-PGDH|PGDH|PGDH1|PHOAR1|SDR36C1	hydroxyprostaglandin dehydrogenase 15-(NAD)	protein-coding	1.65	1.62	1.28	39.61	14.09	6.81	26.94	2.67363
chr14	105585311	105585811	Intergenic	Intergenic	25077	NR_110546	102723354	Hs.569410	NR_110546		LOC102723354	-	uncharacterized LOC102723354	ncRNA	15.23	27.83	5.04	3.11	3.01	17.33	5.48	-2.3865
chr2	193989509	193990009	Intergenic	MLT1A0|LTR|ERVL-MaLR	375188	NR_002769	64002	Hs.546994	NR_002769	ENSG00000227418	PCGEM1	LINC00071|NCRNA00071|PCAT9	PCGEM1, prostate-specific transcript (non-protein coding)	ncRNA	1.28	1.62	1.98	19.08	15.19	11.45	15.82	2.66748
chr8	29385417	29385917	Intergenic	MIRb|SINE|MIR	-177400	NM_001394	1846	Hs.417962	NM_001394	ENSG00000120875	DUSP4	HVH2|MKP-2|MKP2|TYP	dual specificity phosphatase 4	protein-coding	1.1	2.27	1.88	76.93	8.86	4.02	4.86	2.80485
chr1	220907819	220908319	Intergenic	Intergenic	-13519	NM_001317338	54996	Hs.369042	NM_017898	ENSG00000117791	MARC2	MOSC2	mitochondrial amidoxime reducing component 2	protein-coding	2.02	1.78	1.78	17.42	11.4	23.05	18.95	2.63101
chr15	91022397	91022897	intron (NM_003870, intron 26 of 37)	intron (NM_003870, intron 26 of 37)	-50471	NM_001042574	64784	Hs.567572	NM_022769	ENSG00000140577	CRTC3	TORC-3|TORC3	CREB regulated transcription coactivator 3	protein-coding	2.75	1.94	1.19	13.89	10.45	15.31	16.6	2.52622
chr16	81801585	81802085	Intergenic	L1ME1|LINE|L1	-11028	NM_002661	5336	Hs.372303	NM_002661	ENSG00000197943	PLCG2	APLAID|FCAS3|PLC-IV|PLC-gamma-2	phospholipase C gamma 2	protein-coding	1.83	2.43	2.07	22.6	7.6	39.6	24.75	2.36363
chr3	12451576	12452076	intron (NM_001330615, intron 5 of 5)	intron (NM_001330615, intron 5 of 5)	58825	NM_015869	5468	Hs.162646	NM_005037	ENSG00000132170	PPARG	CIMT1|GLM1|NR1C3|PPARG1|PPARG2|PPARgamma	peroxisome proliferator activated receptor gamma	protein-coding	1.28	1.78	1.98	15.14	12.82	24.75	11.59	2.40324
chr3	169950003	169950503	intron (NM_002740, intron 1 of 17)	AluJb|SINE|Alu	10033	NM_002740	5584	Hs.478199	NM_002740	ENSG00000163558	PRKCI	DXS1179E|PKCI|nPKC-iota	protein kinase C iota	protein-coding	1.47	1.78	2.77	13.89	18.68	3.25	26.16	2.32573
chr7	155411355	155411855	Intergenic	Intergenic	25495	NR_126344	100506302	Hs.87856	NR_126344	ENSG00000216895	LOC100506302	-	uncharacterized LOC100506302	ncRNA	3.12	2.43	2.27	51.01	28.17	90.65	55.61	3.35493
chr9	140392337	140392837	exon (NM_001098537, exon 17 of 35)	exon (NM_001098537, exon 17 of 35)	-38801	NM_001130969	26012	Hs.455336	NM_015537	ENSG00000165802	NSMF	HH9|NELF	NMDA receptor synaptonuclear signaling and neuronal migration factor	protein-coding	2.38	9.22	4.54	37.95	7.6	183.77	21.3	2.55833
chr12	45210374	45210874	intron (NM_001145110, intron 3 of 20)	intron (NM_001145110, intron 3 of 20)	58820	NM_001145109	4753	Hs.505326	NM_006159	ENSG00000184613	NELL2	NRP2	neural EGFL like 2	protein-coding	1.1	1.29	1.28	18.04	3.01	13.92	4.7	2.78913
chr20	29532831	29533331	Intergenic	MIR|SINE|MIR	37282	NR_133643	105379478	Hs.98121	NR_133643		LINC01598	-	long intergenic non-protein coding RNA 1598	ncRNA	1.28	0.32	0.4	24.68	14.24	3.87	11.43	3.16178
chr4	1909520	1910020	intron (NM_001042424, intron 3 of 21)	intron (NM_001042424, intron 3 of 21)	7417	NM_133334	7468	Hs.113876	NM_007331	ENSG00000109685	NSD2	KMT3F|KMT3G|MMSET|REIIBP|TRX5|WHS|WHSC1	nuclear receptor binding SET domain protein 2	protein-coding	14.49	32.2	4.84	3.11	1.9	18.87	7.52	-2.63396
chr14	91686839	91687339	intron (NM_001286471, intron 13 of 13)	intron (NM_001286471, intron 13 of 13)	23763	NM_001177676	8111	Hs.8882	NM_003485	ENSG00000119714	GPR68	AI2A6|GPR12A|OGR1	G protein-coupled receptor 68	protein-coding	27.15	68.76	11.06	2.9	3.96	4.95	2.82	-4.03106
chr12	105186276	105186776	Intergenic	Intergenic	135946	NM_032148	84102	Hs.577463	NM_032148	ENSG00000136052	SLC41A2	SLC41A1-L1	solute carrier family 41 member 2	protein-coding	6.79	22.16	4.44	2.49	3.17	5.41	2.04	-2.43211
chr2	128953920	128954420	TTS (NR_027671)	TTS (NR_027671)	105388	NR_027671	56886	Hs.743306	NM_020120	ENSG00000136731	UGGT1	HUGT1|UGCGL1|UGT1	UDP-glucose glycoprotein glucosyltransferase 1	protein-coding	1.28	3.4	2.86	19.08	13.14	37.74	24.9	2.3259
chr1	108115466	108115966	3' UTR (NM_001079874, exon 10 of 10)	3' UTR (NM_001079874, exon 10 of 10)	115410	NM_001079874	10451	Hs.267659	NM_006113	ENSG00000134215	VAV3	-	vav guanine nucleotide exchange factor 3	protein-coding	22.93	19.58	6.81	2.07	1.9	3.56	2.66	-3.85071
chr1	6882477	6882977	intron (NM_001242701, intron 2 of 3)	intron (NM_001242701, intron 2 of 3)	37343	NR_038934	23261	Hs.397705	NM_015215	ENSG00000171735	CAMTA1	CANPMR	calmodulin binding transcription activator 1	protein-coding	0.37	0.97	0.79	5.81	5.86	15.93	22.4	3.21014
chr5	43409865	43410365	intron (NM_001301873, intron 1 of 3)	intron (NM_001301873, intron 1 of 3)	2378	NM_001301873	56477	Hs.656904	NM_019846	ENSG00000151882	CCL28	CCK1|MEC|SCYA28	C-C motif chemokine ligand 28	protein-coding	1.47	3.07	1.78	91.24	17.88	9.28	9.87	2.98174
chr8	32191755	32192255	intron (NM_013962, intron 1 of 4)	intron (NM_013962, intron 1 of 4)	-106257	NR_047475	100874286	Hs.147060	NR_047475	ENSG00000254049	NRG1-IT3	-	NRG1 intronic transcript 3	ncRNA	3.3	3.24	1.98	61.38	14.09	4.95	19.42	2.43786
chr20	48200308	48200808	Intergenic	MIR3|SINE|MIR	-15851	NM_000961	5740	Hs.302085	NM_000961	ENSG00000124212	PTGIS	CYP8|CYP8A1|PGIS|PTGI	prostaglandin I2 synthase	protein-coding	0.92	7.77	5.04	46.86	14.56	72.08	33.52	2.39805
chr19	58609427	58609927	promoter-TSS (NM_001145543)	promoter-TSS (NM_001145543)	53	NM_001145544	65982	Hs.235390	NM_023926	ENSG00000121413	ZSCAN18	ZNF447	zinc finger and SCAN domain containing 18	protein-coding	19.63	45.62	9.98	4.56	4.27	7.27	5.01	-3.21294
chr7	31987658	31988158	intron (NM_001322059, intron 3 of 17)	intron (NM_001322059, intron 3 of 17)	122566	NM_001191057	5137	Hs.143821	NM_005020	ENSG00000154678	PDE1C	Hcam3|cam-PDE 1C|hCam-3	phosphodiesterase 1C	protein-coding	0.37	3.24	2.07	23.22	14.72	14.39	39.79	2.91253
chr10	66627361	66627861	Intergenic	MER61E|LTR|ERV1	42326	NR_001446	305	Hs.591361	NR_001446		ANXA2P3	ANX2L3|ANX2P3|LIP2|LPC2C	annexin A2 pseudogene 3	pseudo	2.38	1.78	1.28	29.24	25.96	6.96	19.11	2.43298
chr5	27502266	27502766	Intergenic	THE1D-int|LTR|ERVL-MaLR	30117	NR_038848	643401	Hs.533212	NR_038848	ENSG00000250337	LINC01021	-	long intergenic non-protein coding RNA 1021	ncRNA	1.65	1.29	2.17	34.84	10.76	12.22	6.42	2.35615
chr2	230024842	230025342	intron (NM_001100818, intron 1 of 2)	MIRc|SINE|MIR	71716	NM_001330156	55022	Hs.745038	NM_017933	ENSG00000153823	PID1	HMFN2073|NYGGF4|P-CLI1|PCLI1	phosphotyrosine interaction domain containing 1	protein-coding	1.1	2.43	3.36	49.35	21.37	25.06	17.39	3.03957
chr14	20886586	20887086	Intergenic	Intergenic	-5257	NM_001319035	7011	Hs.508835	NM_007110	ENSG00000129566	TEP1	TLP1|TP1|TROVE1|VAULT2|p240	telomerase associated protein 1	protein-coding	2.2	1.29	1.38	13.48	16.93	15.16	20.99	3.27386
chrX	3388140	3388640	Intergenic	MER41A|LTR|ERV1	-123706	NM_015419	25878	Hs.369422	NM_015419	ENSG00000101825	MXRA5	-	matrix remodeling associated 5	protein-coding	1.65	0.49	0.59	22.39	12.19	26.14	12.06	3.59534
chr2	74166524	74167024	intron (NM_001318859, intron 2 of 4)	intron (NM_001318859, intron 2 of 4)	12821	NR_134897	1716	Hs.469022	NM_001929	ENSG00000114956	DGUOK	MTDPS3|NCPH|PEOB4|dGK	deoxyguanosine kinase	protein-coding	14.49	34.14	5.04	1.04	3.17	5.72	2.04	-3.21124
chr6	105707732	105708232	Intergenic	Tigger3a|DNA|TcMar-Tigger	-80124	NM_022361	64208	Hs.458336	NM_022361	ENSG00000132429	POPDC3	POP3|bA355M14.1	popeye domain containing 3	protein-coding	1.1	1.29	2.27	13.89	5.7	26.45	17.39	2.42342
chr1	25494873	25495373	Intergenic	LTR22B|LTR|ERVK	63890	NM_015484	25949	Hs.20013	NM_015484	ENSG00000117614	SYF2	CBPIN|NTC31|P29|fSAP29	SYF2 pre-mRNA splicing factor	protein-coding	1.1	1.46	1.58	9.95	8.07	35.42	12.06	2.62936
chr14	21155543	21156043	intron (NM_002937, intron 1 of 1)	MIRc|SINE|MIR	-1139	NM_001097577	283	Hs.283749	NM_001145	ENSG00000214274	ANG	ALS9|HEL168|RAA1|RNASE4|RNASE5	angiogenin	protein-coding	2.38	3.56	1.68	17.42	17.88	20.57	43.07	2.90736
chr7	73726932	73727432	intron (NM_003388, intron 1 of 16)	intron (NM_003388, intron 1 of 16)	23377	NM_003388	7461	Hs.647018	NM_003388	ENSG00000106665	CLIP2	CLIP|CLIP-115|CYLN2|WBSCR3|WBSCR4|WSCR3|WSCR4	CAP-Gly domain containing linker protein 2	protein-coding	9.91	28.8	5.14	3.32	2.37	11.6	5.01	-2.71359
chr17	6470723	6471223	Intergenic	Intergenic	-11096	NM_031220	83394	Hs.183983	NM_031220	ENSG00000091622	PITPNM3	ACKR6|CORD5|NIR1|RDGBA3	PITPNM family member 3	protein-coding	11.92	27.18	6.12	3.11	3.8	8.51	3.76	-2.6474
chr15	68194188	68194688	Intergenic	MER21C|LTR|ERVL	-62055	NR_125730	103625684		NR_125730	ENSG00000207357	RNU6-2	U6-2	RNA, U6 small nuclear 2	snRNA	2.2	1.29	1.09	10.99	13.45	4.64	17.54	2.56694
chr20	19590297	19590797	intron (NM_020689, intron 6 of 16)	intron (NM_020689, intron 6 of 16)	-276618	NM_001242581	54453	Hs.472270	NM_018993	ENSG00000132669	RIN2	MACS|RASSF4	Ras and Rab interactor 2	protein-coding	1.28	0.97	1.48	7.46	11.4	10.67	16.92	2.67498
chr6	132302086	132302586	Intergenic	Intergenic	-29818	NM_001901	1490	Hs.410037	NM_001901	ENSG00000118523	CTGF	CCN2|HCS24|IGFBP8|NOV2	connective tissue growth factor	protein-coding	1.65	0.97	1.68	16.8	7.75	37.13	18.95	2.36352
chr1	100113642	100114142	intron (NM_017734, intron 1 of 7)	intron (NM_017734, intron 1 of 7)	2461	NM_017734	54873	Hs.483993	NM_017734	ENSG00000099260	PALMD	C1orf11|PALML	palmdelphin	protein-coding	6.6	18.61	9.68	0.41	3.96	2.01	6.58	-2.34014
chr5	148329579	148330079	Intergenic	Intergenic	112908	NM_024577	79628	Hs.483784	NM_024577	ENSG00000169247	SH3TC2	CMT4C|MNMN	SH3 domain and tetratricopeptide repeats 2	protein-coding	14.86	22.97	6.02	3.11	2.69	2.63	4.7	-2.94447
chr7	98809312	98809812	Intergenic	Intergenic	-4450	NM_001145715	402569	Hs.253050	NM_001145715	ENSG00000185467	KPNA7	IPOA8	karyopherin subunit alpha 7	protein-coding	6.79	4.04	3.75	148.05	24.69	45.32	53.88	2.82589
chr3	178755100	178755600	intron (NM_152240, intron 3 of 6)	MER52A|LTR|ERV1	34306	NM_152240	64393	Hs.371609	NM_022470	ENSG00000172667	ZMAT3	PAG608|WIG-1|WIG1	zinc finger matrin-type 3	protein-coding	10.46	27.34	11.95	2.28	4.27	12.38	2.82	-2.5959
chr20	51959932	51960432	intron (NM_001193421, intron 2 of 2)	intron (NM_001193421, intron 2 of 2)	158360	NM_001193421	128553	Hs.473117	NM_173485	ENSG00000182463	TSHZ2	C20orf17|OVC10-2|TSH2|ZABC2|ZNF218	teashirt zinc finger homeobox 2	protein-coding	2.93	6.15	3.46	47.48	8.55	176.96	8.14	2.59786
chr11	15640144	15640644	Intergenic	Intergenic	-25037	NM_001293172	102724957	Hs.512245	NM_001293172	ENSG00000254695	LOC102724957	-	uncharacterized LOC102724957	protein-coding	1.65	2.1	1.78	23.64	9.81	16.55	35.87	2.98593
chr5	14977295	14977795	Intergenic	Intergenic	-105658	NM_054027	56172	Hs.156727	NM_054027	ENSG00000154122	ANKH	ANK|CCAL2|CMDJ|CPPDD|HANK|MANK	ANKH inorganic pyrophosphate transport regulator	protein-coding	1.65	1.13	0.79	23.64	8.23	40.99	6.74	3.19926
chr17	67729767	67730267	intron (NR_109972, intron 3 of 4)	intron (NR_109972, intron 3 of 4)	139889	NR_109972	101928122	Hs.579342	NR_109971	ENSG00000227517	LINC01483	-	long intergenic non-protein coding RNA 1483	ncRNA	14.31	34.78	6.81	0.62	1.9	9.9	3.92	-3.20306
chr14	38437937	38438437	Intergenic	Intergenic	-66858	NR_135286	400208	Hs.660501	NR_135286	ENSG00000259091	LINC00517	C14orf26	long intergenic non-protein coding RNA 517	ncRNA	0.37	0.32	1.38	15.97	12.66	1.55	13.16	3.14664
chr7	84331121	84331621	Intergenic	MLT2B5|LTR|ERVL	169579	NR_110079	101927378	Hs.539042	NR_110079	ENSG00000235139	LOC101927378	-	uncharacterized LOC101927378	ncRNA	2.75	4.21	3.75	74.44	10.92	32.64	37.28	2.39909
chr2	102615373	102615873	intron (NR_048564, intron 1 of 8)	intron (NR_048564, intron 1 of 8)	199	NR_048564	7850	Hs.25333	NM_004633	ENSG00000115590	IL1R2	CD121b|CDw121b|IL-1R-2|IL-1RT-2|IL-1RT2|IL1R2c|IL1RB	interleukin 1 receptor type 2	protein-coding	3.49	2.91	2.07	34.42	19.31	19.18	14.88	2.63152

## Sheet: S1C DAR Promoters
Chr	Start	End	Annotation	Detailed Annotation	Distance to TSS	Nearest PromoterID	Entrez ID	Nearest Unigene	Nearest Refseq	Nearest Ensembl	Gene Name	Gene Alias	Gene Description	Gene Type	N_003	N_005	N_006	T_002	T_003	T_005	T_006	Log2(Cancer/Normal)
chr6	36304520	36305020	promoter-TSS (NM_001010903)	promoter-TSS (NM_001010903)	-108	NM_001010903	389384	Hs.162104	NM_001010903	ENSG00000189325	C6orf222	-	chromosome 6 open reading frame 222	protein-coding	2.93	2.75	2.47	33.38	9.18	55.69	16.6	2.46768
chr20	42983892	42984392	promoter-TSS (NM_001030004)	promoter-TSS (NM_001030004)	-299	NM_001287184	3172	Hs.116462	NM_000457	ENSG00000101076	HNF4A	FRTS4|HNF4|HNF4a7|HNF4a8|HNF4a9|HNF4alpha|MODY|MODY1|NR2A1|NR2A21|TCF|TCF14	hepatocyte nuclear factor 4 alpha	protein-coding	3.3	6.15	3.75	103.68	41.47	109.36	70.96	3.55727
chr17	73642114	73642614	promoter-TSS (NM_001162997)	promoter-TSS (NM_001162997)	-282	NM_001162997	100130933	Hs.662541	NM_001162997	ENSG00000259120	SMIM6	C17orf110	small integral membrane protein 6	protein-coding	8.07	10.52	4.25	64.49	25.01	136.13	72.05	2.50065
chr8	110987745	110988245	promoter-TSS (NM_014379)	promoter-TSS (NM_014379)	81	NM_014379	27012	Hs.13285	NM_014379	ENSG00000164794	KCNV1	HNKA|KCNB3|KV2.3|KV8.1	potassium voltage-gated channel modifier subfamily V member 1	protein-coding	15.41	21.36	10.17	4.35	3.8	3.87	4.07	-2.36637
chr1	113006989	113007489	Intergenic	Intergenic	-1924	NM_004185	7482	Hs.258575	NM_004185	ENSG00000134245	WNT2B	WNT13	Wnt family member 2B	protein-coding	22.56	52.26	13.43	3.53	2.22	24.29	7.83	-2.51948
chr2	98702055	98702555	Intergenic	Intergenic	-1290	NM_144992	200403	Hs.269977	NM_144992	ENSG00000168658	VWA3B	SCAR22	von Willebrand factor A domain containing 3B	protein-coding	1.65	5.34	2.17	16.17	22	14.54	41.98	2.77874
chr20	35504221	35504721	promoter-TSS (NM_001304783)	promoter-TSS (NM_001304783)	-53	NM_080628	140711	Hs.472630	NM_080628	ENSG00000101342	TLDC2	C20orf118	TBC/LysM-associated domain containing 2	protein-coding	6.42	9.87	5.83	38.98	17.73	243.17	11.43	2.36825
chr4	134070078	134070578	promoter-TSS (NM_032961)	promoter-TSS (NM_032961)	-57	NR_125885	101927359	Hs.649960	NR_125885	ENSG00000250241	LOC101927359	-	uncharacterized LOC101927359	ncRNA	13.57	27.34	10.27	3.53	3.64	2.48	3.76	-2.9185
chr7	99573581	99574081	promoter-TSS (NM_001185)	promoter-TSS (NM_001185)	-96	NM_001185	563	Hs.546239	NM_001185	ENSG00000160862	AZGP1	ZA2G|ZAG	alpha-2-glycoprotein 1, zinc-binding	protein-coding	4.4	8.74	2.86	155.52	7.44	56.77	18.95	2.98252
chr20	42187210	42187710	promoter-TSS (NM_170693)	promoter-TSS (NM_170693)	-175	NM_170693	10110	Hs.300863	NM_016276	ENSG00000101049	SGK2	H-SGK2|dJ138B7.2	SGK2, serine/threonine kinase 2	protein-coding	4.22	4.53	3.06	87.09	42.26	120.35	39.47	3.72823
chr1	35220805	35221305	intron (NM_005268, intron 1 of 1)	intron (NM_005268, intron 1 of 1)	407	NM_005268	2709	Hs.198249	NM_005268	ENSG00000189280	GJB5	CX31.1	gap junction protein beta 5	protein-coding	23.48	53.07	7.11	1.66	3.96	18.25	1.41	-2.71551
chr6	80340533	80341033	promoter-TSS (NM_031469)	promoter-TSS (NM_031469)	-39	NM_031469	83699	Hs.302772	NM_031469	ENSG00000198478	SH3BGRL2	-	SH3 domain binding glutamate rich protein like 2	protein-coding	10.64	23.94	9.68	81.28	47.48	92.35	115.44	2.51302
chr16	49315641	49316141	promoter-TSS (NM_004352)	promoter-TSS (NM_004352)	-149	NM_004352	869	Hs.458423	NM_004352	ENSG00000102924	CBLN1	-	cerebellin 1 precursor	protein-coding	18.16	39.31	4.44	5.6	5.22	4.49	5.95	-2.45122
chr11	31832492	31832992	promoter-TSS (NM_001258465)	promoter-TSS (NM_001258465)	-52	NM_001258465	5080	Hs.270303	NM_000280	ENSG00000007372	PAX6	AN|AN2|D11S812E|FVH1|MGDA|WAGR	paired box 6	protein-coding	3.49	5.66	5.33	122.76	26.9	43.31	30.39	2.83325
chr16	21244713	21245213	promoter-TSS (NM_145865)	promoter-TSS (NM_145865)	-53	NM_145865	257629	Hs.115959	NM_145865	ENSG00000175311	ANKS4B	HARP	ankyrin repeat and sterile alpha motif domain containing 4B	protein-coding	1.28	1.62	1.48	10.58	9.5	30.47	11.28	2.76441
chr6	30130744	30131244	promoter-TSS (NM_033229).7	promoter-TSS (NM_033229).7	11	NM_033229	89870	Hs.591789	NM_033229	ENSG00000204610	TRIM15	RNF93|ZNF178|ZNFB7	tripartite motif containing 15	protein-coding	2.75	5.18	2.17	49.35	17.41	50.58	24.9	2.61168
chrX	74742775	74743275	5' UTR (NM_001146257, exon 1 of 3)	5' UTR (NM_001146257, exon 1 of 3)	312	NM_001146256	158866	Hs.253211	NM_144969	ENSG00000102383	ZDHHC15	MRX91	zinc finger DHHC-type containing 15	protein-coding	8.8	37.37	10.07	2.49	2.85	12.53	5.17	-2.61188
chr20	52686877	52687377	5' UTR (NM_003657, exon 1 of 12)	5' UTR (NM_003657, exon 1 of 12)	177	NM_003657	8537	Hs.400556	NM_003657	ENSG00000064787	BCAS1	AIBC1|NABC1	breast carcinoma amplified sequence 1	protein-coding	6.79	11.97	7.11	42.51	40.04	524.24	82.7	3.22394
chr19	39303448	39303948	promoter-TSS (NM_006149)	promoter-TSS (NM_006149)	42	NM_006149	3960	Hs.5302	NM_006149	ENSG00000171747	LGALS4	GAL4|L36LBP	galectin 4	protein-coding	6.05	7.6	2.67	40.43	20.73	160.26	61.71	3.1307
chr5	126984759	126985259	5' UTR (NM_001048252, exon 1 of 3)	5' UTR (NM_001048252, exon 1 of 3)	296	NM_001048252	613212	Hs.66194	NM_001048252	ENSG00000205279	CTXN3	KABE	cortexin 3	protein-coding	14.12	16.66	5.83	3.94	2.69	4.8	3.6	-2.52063
chr6	80657020	80657520	promoter-TSS (NM_022726)	promoter-TSS (NM_022726)	45	NM_022726	6785	Hs.101915	NM_022726	ENSG00000118402	ELOVL4	ADMD|CT118|ISQMR|SCA34|STGD2|STGD3	ELOVL fatty acid elongase 4	protein-coding	23.85	43.04	15.11	13.48	5.7	6.03	7.05	-2.50559
chr12	102456799	102457299	Intergenic	MER51A|LTR|ERV1	-1147	NM_016053	51019	Hs.405692	NM_016053	ENSG00000120860	WASHC3	CCDC53|CGI-116	WASH complex subunit 3	protein-coding	1.47	2.27	2.47	33.8	21.05	33.57	37.12	3.16076
chr7	100546801	100547301	promoter-TSS (NM_005960)	promoter-TSS (NM_005960)	-1	NM_005960	4584	Hs.703577	NM_005960	ENSG00000169894	MUC3A	MUC-3A|MUC3	mucin 3A, cell surface associated	protein-coding	2.75	5.99	7.01	136.65	14.88	62.03	26	2.52603
chr4	44450805	44451305	promoter-TSS (NM_198353)	promoter-TSS (NM_198353)	-231	NM_198353	386617	Hs.479644	NM_198353	ENSG00000183783	KCTD8	-	potassium channel tetramerization domain containing 8	protein-coding	19.81	51.77	12.84	9.54	6.17	6.34	3.76	-2.34748
chr3	156543370	156543870	promoter-TSS (NM_001004316)	promoter-TSS (NM_001004316)	-476	NM_001004316	389170	Hs.478048	NM_001004316	ENSG00000197980	LEKR1	-	leucine, glutamate and lysine rich 1	protein-coding	6.79	8.74	6.12	57.02	34.19	46.72	29.13	2.64621
chr2	133173667	133174167	promoter-TSS (NM_001508)	promoter-TSS (NM_001508)	-230	NM_001508	2863	Hs.432395	NM_001508	ENSG00000183840	GPR39	-	G protein-coupled receptor 39	protein-coding	10.09	25.4	9.98	294.24	47	135.2	53.73	2.5635
chr4	155511717	155512217	promoter-TSS (NM_000508)	promoter-TSS (NM_000508)	-49	NM_000508	2243	Hs.351593	NM_000508	ENSG00000171560	FGA	Fib2	fibrinogen alpha chain	protein-coding	1.65	2.27	1.68	27.16	2.06	29.08	4.07	2.63078
chr6	19837128	19837628	promoter-TSS (NM_001546)	promoter-TSS (NM_001546)	-223	NM_001546	3400	Hs.519601	NM_001546	ENSG00000172201	ID4	IDB4|bHLHb27	inhibitor of DNA binding 4, HLH protein	protein-coding	18.89	69.41	11.65	7.05	6.33	4.33	4.54	-2.87576
chr14	24896024	24896524	3' UTR (NM_001039771, exon 3 of 3)	3' UTR (NM_001039771, exon 3 of 3)	-2218	NM_001290256	23351	Hs.713590	NM_015299	ENSG00000100441	KHNYN	KIAA0323	KH and NYN domain containing	protein-coding	7.89	9.06	4.54	57.44	28.49	96.99	58.27	2.51388
chr19	53757913	53758413	promoter-TSS (NM_182609)	promoter-TSS (NM_182609)	-7	NM_182609	342926	Hs.20506	NM_182609	ENSG00000197928	ZNF677	-	zinc finger protein 677	protein-coding	10.64	20.55	8	2.28	5.06	5.26	2.19	-2.32228
chr19	22816830	22817330	promoter-TSS (NM_020855)	promoter-TSS (NM_020855)	-46	NM_020855	57615	Hs.232108	NM_020855	ENSG00000229676	ZNF492	ZNF115	zinc finger protein 492	protein-coding	13.21	32.52	12.15	1.66	4.91	5.57	4.7	-2.56805
chr3	137717317	137717817	promoter-TSS (NM_001002026)	promoter-TSS (NM_001002026)	-91	NM_001002026	51208	Hs.655324	NM_016369	ENSG00000066405	CLDN18	SFTA5|SFTPJ	claudin 18	protein-coding	3.67	4.37	4.35	77.34	52.07	18.87	50.75	3.06678
chr1	167059534	167060034	promoter-TSS (NM_005814)	promoter-TSS (NM_005814)	84	NM_005814	10223	Hs.651244	NM_005814	ENSG00000143167	GPA33	A33	glycoprotein A33	protein-coding	1.65	2.43	4.25	40.85	8.7	79.2	11.43	2.49197
chr11	64656416	64656916	non-coding (NR_133640, exon 3 of 3)	non-coding (NR_133640, exon 3 of 3)	2052	NR_029578	406967		NR_029578	ENSG00000229719	MIR192	MIRN192|miR-192|miRNA192	microRNA 192	ncRNA	9.54	7.6	4.94	82.11	47.16	125.92	48.71	2.5897
chr4	106473414	106473914	promoter-TSS (NM_017700)	promoter-TSS (NM_017700)	-113	NM_017700	54848	Hs.585224	NM_017700	ENSG00000236699	ARHGEF38	-	Rho guanine nucleotide exchange factor 38	protein-coding	9.36	16.02	6.02	77.14	34.03	110.6	74.4	2.33866
chr5	891181	891681	intron (NM_023924, intron 2 of 15)	intron (NM_023924, intron 2 of 15)	1206	NR_134296	65980	Hs.449278	NM_023924	ENSG00000028310	BRD9	LAVS3040|PRO9856	bromodomain containing 9	protein-coding	4.59	4.37	3.06	52.88	9.81	159.17	35.4	2.95803
chr19	22234974	22235474	promoter-TSS (NM_033468)	promoter-TSS (NM_033468)	-26	NM_001316996	113835	Hs.283900	NM_033468	ENSG00000197134	ZNF257	BMZF-4|BMZF4	zinc finger protein 257	protein-coding	16.69	31.55	5.93	1.04	6.33	5.26	2.82	-2.34585
chr19	51978356	51978856	Intergenic	MER77B|LTR|ERVL	-3291	NM_001278392	729767	Hs.653111	NM_001080405	ENSG00000213822	CEACAM18	-	carcinoembryonic antigen related cell adhesion molecule 18	protein-coding	1.83	1.13	1.78	20.94	17.73	17.48	16.13	2.71672
chr8	13424073	13424573	promoter-TSS (NM_001007090)	promoter-TSS (NM_001007090)	-29	NM_001007090	157773	Hs.104941	NM_001007090	ENSG00000164743	C8orf48	-	chromosome 8 open reading frame 48	protein-coding	10.46	22.33	11.06	3.73	3.64	2.94	5.64	-2.51064
chr6	73974085	73974585	intron (NM_001251874, intron 2 of 4)	intron (NM_001251874, intron 2 of 4)	-1416	NM_030568	80759	Hs.433062	NM_030568	ENSG00000135314	KHDC1	C6orf147|C6orf148|Em:AC019205.8|NDG1|bA257K9.4	KH homology domain containing 1	protein-coding	18.16	59.54	10.77	4.15	3.48	7.43	4.39	-3.01341
chr2	108904964	108905464	5' UTR (NM_001056, exon 1 of 8)	5' UTR (NM_001056, exon 1 of 8)	119	NM_176825	6819	Hs.436123	NM_001056	ENSG00000198203	SULT1C2	ST1C1|ST1C2|SULT1C1|humSULTC2	sulfotransferase family 1C member 2	protein-coding	1.1	4.04	5.23	27.37	22.63	53.52	31.64	2.44066
chr5	178450493	178450993	promoter-TSS (NM_001136116)	promoter-TSS (NM_001136116)	-33	NM_001136116	345462	Hs.445740	NM_001136116	ENSG00000234284	ZNF879	DKFZp686E2433	zinc finger protein 879	protein-coding	17.24	40.77	14.02	4.98	5.86	4.64	5.01	-2.83206
chr12	8974846	8975346	promoter-TSS (NM_144670)	promoter-TSS (NM_144670)	28	NM_144670	144568	Hs.620532	NM_144670	ENSG00000166535	A2ML1	CPAMD9|p170	alpha-2-macroglobulin like 1	protein-coding	15.23	25.24	3.85	1.45	1.58	6.19	1.72	-3.21965
chr1	27240562	27241062	promoter-TSS (NM_021969)	promoter-TSS (NM_021969)	-245	NM_021969	8431	Hs.427055	NM_021969	ENSG00000131910	NR0B2	SHP|SHP1	nuclear receptor subfamily 0 group B member 2	protein-coding	4.22	4.53	3.56	34.63	32.13	86.16	101.81	3.25399
chr19	56879322	56879822	promoter-TSS (NR_024055)	promoter-TSS (NR_024055)	82	NR_024055	147947	Hs.467326	NM_194319	ENSG00000240225	ZNF542P	ZNF542	zinc finger protein 542, pseudogene	pseudo	10.64	30.9	8.99	2.28	2.85	8.97	3.13	-2.75212
chr20	42983892	42984392	promoter-TSS (NM_001030004)	promoter-TSS (NM_001030004)	-299	NM_001287184	3172	Hs.116462	NM_000457	ENSG00000101076	HNF4A	FRTS4|HNF4|HNF4a7|HNF4a8|HNF4a9|HNF4alpha|MODY|MODY1|NR2A1|NR2A21|TCF|TCF14	hepatocyte nuclear factor 4 alpha	protein-coding	3.3	6.15	3.75	104.3	41.47	109.36	71.43	2.43242
chr5	45696231	45696731	promoter-TSS (NM_021072)	promoter-TSS (NM_021072)	-261	NM_021072	348980	Hs.353176	NM_021072	ENSG00000164588	HCN1	BCNG-1|BCNG1|EIEE24|HAC-2	hyperpolarization activated cyclic nucleotide gated potassium channel 1	protein-coding	12.11	43.2	9.48	4.77	3.64	5.57	2.98	-2.83459
chr3	108015034	108015534	promoter-TSS (NM_001282556)	promoter-TSS (NM_001282556)	-53	NM_001282556	11148	Hs.225968	NM_007072	ENSG00000114455	HHLA2	B7-H5|B7-H7|B7H7|B7y	HERV-H LTR-associating 2	protein-coding	4.22	2.27	1.38	26.13	22.79	21.5	27.41	2.90718
chr19	57049696	57050196	promoter-TSS (NM_001308440)	promoter-TSS (NM_001308440)	-371	NM_020828	140612	Hs.14794	NM_020828	ENSG00000196867	ZFP28	mkr5	ZFP28 zinc finger protein	protein-coding	23.85	56.79	13.23	7.46	5.54	7.73	2.35	-2.83321
chr19	56989248	56989748	promoter-TSS (NM_001321356)	promoter-TSS (NM_001321356)	5	NR_036522	100128252	Hs.23133	NM_198879	ENSG00000166770	ZNF667-AS1	MORT	ZNF667 antisense RNA 1 (head to head)	ncRNA	11.19	35.11	8.49	1.87	2.53	4.95	1.88	-3.38502
chr20	42187210	42187710	promoter-TSS (NM_170693)	promoter-TSS (NM_170693)	-175	NM_170693	10110	Hs.300863	NM_016276	ENSG00000101049	SGK2	H-SGK2|dJ138B7.2	SGK2, serine/threonine kinase 2	protein-coding	4.22	4.53	3.06	87.3	42.26	120.35	39.47	2.34836
chr3	120400849	120401349	5' UTR (NM_000187, exon 1 of 14)	5' UTR (NM_000187, exon 1 of 14)	319	NM_000187	3081	Hs.368254	NM_000187	ENSG00000113924	HGD	AKU|HGO	homogentisate 1,2-dioxygenase	protein-coding	1.28	1.78	2.67	16.38	22.95	21.5	13.31	2.51331
chr11	46297794	46298294	Intergenic	Intergenic	-1145	NM_052854	90993	Hs.405961	NM_052854	ENSG00000157613	CREB3L1	OASIS	cAMP responsive element binding protein 3 like 1	protein-coding	3.12	5.5	1.68	42.09	17.41	23.51	52.63	2.69328
chr6	24668635	24669135	intron (NM_018473, intron 1 of 2)	MER51A|LTR|ERV1	1622	NM_001160094	55856	Hs.731605	NM_018473	ENSG00000112304	ACOT13	HT012|PNAS-27|THEM2	acyl-CoA thioesterase 13	protein-coding	4.22	0.81	2.67	56.82	19.78	31.25	45.89	2.9597
chr19	57019011	57019511	promoter-TSS (NM_001321768)	promoter-TSS (NM_001321768)	49	NM_020813	57573	Hs.230188	NM_020813	ENSG00000196263	ZNF471	ERP1|Z1971	zinc finger protein 471	protein-coding	28.62	92.87	12.64	3.53	4.75	9.9	6.89	-2.78156
chr7	87856329	87856829	promoter-TSS (NM_001256892)	promoter-TSS (NM_001256892)	-271	NM_198901	6717	Hs.489040	NM_003130	ENSG00000075142	SRI	CP-22|CP22|SCN|V19	sorcin	protein-coding	3.3	3.88	2.07	85.64	25.64	35.58	64.38	3.62679
chr10	1779484	1779984	promoter-TSS (NM_018702)	promoter-TSS (NM_018702)	-64	NM_018702	105	Hs.586663	NM_018702	ENSG00000185736	ADARB2	ADAR3|RED2	adenosine deaminase, RNA specific B2 (inactive)	protein-coding	14.12	33.81	10.17	2.7	4.27	9.44	5.64	-2.54951
chr7	23275486	23275986	Intergenic	Intergenic	-10580	NM_002510	10457	Hs.190495	NM_002510	ENSG00000136235	GPNMB	HGFIN|NMB	glycoprotein nmb	protein-coding	16.33	33	5.93	1.87	2.22	9.59	4.23	-3.02978
chr2	47572048	47572548	promoter-TSS (NR_110208)	promoter-TSS (NR_110208)	-85	NR_110208	101927043	Hs.515976	NR_110207	ENSG00000234690	LOC101927043	-	uncharacterized LOC101927043	ncRNA	5.69	8.09	5.23	47.07	23.42	184.23	37.91	2.6792
chr12	113574638	113575138	promoter-TSS (NM_001193520)	promoter-TSS (NM_001193520)	-844	NM_001193520	8437	Hs.528693	NM_004658	ENSG00000111344	RASAL1	RASAL	RAS protein activator like 1	protein-coding	5.87	12.78	2.96	31.52	17.73	66.98	61.87	2.40628
chr4	41936089	41936589	promoter-TSS (NM_018126)	promoter-TSS (NM_018126)	-798	NM_018126	55161	Hs.31082	NM_018126	ENSG00000109133	TMEM33	1600019D15Rik|SHINC-3|SHINC3	transmembrane protein 33	protein-coding	3.3	1.78	2.57	37.53	7.28	16.09	36.18	2.35851
chr3	58652395	58652895	promoter-TSS (NM_138805)	promoter-TSS (NM_138805)	-84	NM_138805	131177	Hs.61265	NM_138805	ENSG00000198643	FAM3D	EF7|OIT1	family with sequence similarity 3 member D	protein-coding	4.59	6.63	6.02	43.75	31.02	43.16	58.27	2.3571
chr1	204346193	204346693	Intergenic	Intergenic	-7596	NR_027022	127841	Hs.213144	NR_027022	ENSG00000280924	LINC00628	-	long intergenic non-protein coding RNA 628	ncRNA	2.75	3.56	3.46	24.68	12.34	61.26	53.1	2.73483
chr9	23826173	23826673	promoter-TSS (NM_004432)	promoter-TSS (NM_004432)	-360	NM_004432	1993	Hs.166109	NM_004432	ENSG00000107105	ELAVL2	HEL-N1|HELN1|HUB	ELAV like RNA binding protein 2	protein-coding	14.12	43.04	14.42	1.04	4.11	1.24	6.11	-3.17785
chr4	66535904	66536404	promoter-TSS (NM_001318761)	promoter-TSS (NM_001318761)	59	NM_004439	2044	Hs.654492	NM_004439	ENSG00000145242	EPHA5	CEK7|EHK-1|EHK1|EK7|HEK7|TYRO4	EPH receptor A5	protein-coding	10.82	28.64	9.98	2.49	2.85	4.64	3.92	-2.77898
chr7	98805549	98806049	promoter-TSS (NM_001145715)	promoter-TSS (NM_001145715)	-687	NM_001145715	402569	Hs.253050	NM_001145715	ENSG00000185467	KPNA7	IPOA8	karyopherin subunit alpha 7	protein-coding	2.2	7.93	3.56	41.47	10.92	27.38	41.04	2.45259
chrX	65382001	65382501	promoter-TSS (NM_138737)	promoter-TSS (NM_138737)	-140	NM_138737	9843	Hs.31720	NM_014799	ENSG00000089472	HEPH	CPL	hephaestin	protein-coding	2.2	2.91	1.48	13.89	18.52	64.97	24.59	2.97154
chr11	77182791	77183291	intron (NM_001128620, intron 1 of 15)	intron (NM_001128620, intron 1 of 15)	2067	NM_002576	5058	Hs.435714	NM_002576	ENSG00000149269	PAK1	PAKalpha	p21 (RAC1) activated kinase 1	protein-coding	2.2	1.62	2.27	37.32	12.98	25.06	30.39	2.92354
