# Supplementary material for: Identification of a primitive intestinal transcription factor network shared between esophageal adenocarcinoma and its precancerous precursor state
Source: Genome Res. 2019 May;29(5):723–36. doi: 10.1101/gr.243345.118 (PMC6499311; doi:10.1101/gr.243345.118)
Supplement: Supplemental Material [file supp_gr.243345.118_Supplemental_Table_S2.xlsx]

## Sheet: Legend
Table S2. DNA motifs enriched in OAC-specific open chromatin regions. Top ten motifs found by de novo motif discovery and their associated transcription factors that are enriched in ‘open in cancer’ (A) or ‘closed in cancer’ (B) promoter or non-promoter regions.

## Sheet: S2A 5x open
Non-promoter regions
Rank	Motif	P-value	log P-pvalue	% of Targets	% of Background	STD(Bg STD)	Best Match/Details
1	TGGACTTTGGCC	1e-117	-271.4	0.2245	0.0188	51.2bp	(66.8bp)HNF4G/MA0484.1/Jaspar(0.943)
2	CTTATCTG	1e-76	-176.4	0.4254	0.1398	51.5bp	(62.0bp)Gata6(Zf)/HUG1N-GATA6-ChIP-Seq(GSE51936)/Homer(0.967)
3	TAAGTAAACA	1e-65	-151.4	0.2287	0.0451	54.0bp	(63.2bp)FOXA1(Forkhead)/MCF7-FOXA1-ChIP-Seq(GSE26831)/Homer(0.981)
4	GTTAATCATTAA	1e-60	-138.2	0.113	0.0089	59.7bp	(56.7bp)HNF1b(Homeobox)/PDAC-HNF1B-ChIP-Seq(GSE64557)/Homer(0.973)
5	TGACTCAC	1e-50	-116.8	0.2748	0.0831	51.5bp	(67.6bp)JunB(bZIP)/DendriticCells-Junb-ChIP-Seq(GSE36099)/Homer(0.973)
6	AACCAGGAAGTA	1e-33	-78	0.1534	0.0384	53.8bp	(62.1bp)ELF3(ETS)/PDAC-ELF3-ChIP-Seq(GSE64557)/Homer(0.909)
7	AAGGTGTGTC	1e-26	-61.74	0.1144	0.0269	49.7bp	(72.2bp)TBX15/MA0803.1/Jaspar(0.841)
8	CCCAGGTTTATT	1e-13	-31.26	0.0265	0.0023	53.4bp	(62.8bp)ZNF416(Zf)/HEK293-ZNF416.GFP-ChIP-Seq(GSE58341)/Homer(0.661)
9	GGTATTCC	1e-12	-29.54	0.0851	0.0288	53.7bp	(65.7bp)TEAD4(TEA)/Tropoblast-Tead4-ChIP-Seq(GSE37350)/Homer(0.724)
10	CCTAACACAGGG	1e-12	-28.17	0.0098	0.0001	58.0bp	(48.1bp)PB0121.1_Foxj3_2/Jaspar(0.641)
Promoter regions
Rank	Motif	P-value	log P-pvalue	% of Targets	% of Background	STD(Bg STD)	Best Match/Details
1	GGACTTTGATCC	1e-15	-35.29	0.2162	0.0014	50.4bp (71.5bp)	Hnf4a/MA0114.3/Jaspar(0.868)
2 *	AGCTTTGACTTT	1e-11	-26.15	0.3784	0.0325	55.3bp (83.8bp)	PB0134.1_Hnf4a_2/Jaspar(0.607)
3 *	GTGTGCAGCCAG	1e-10	-23.7	0.1351	0.0007	29.2bp (88.9bp)	Smad3(MAD)/NPC-Smad3-ChIP-Seq(GSE36673)/Homer(0.619)
4 *	CCTAGTTC	1e-07	-17.75	0.4595	0.0992	45.5bp (76.7bp)	PB0200.1_Zfp187_2/Jaspar(0.750)
5 *	TTATGGCTCC	1e-07	-17.21	0.2432	0.0197	70.5bp (69.7bp)	PH0064.1_Hoxb9/Jaspar(0.697)
6 *	GAGGAAGTTT	1e-07	-17.15	0.1622	0.0051	50.4bp (67.4bp)	PU.1(ETS)/ThioMac-PU.1-ChIP-Seq(GSE21512)/Homer(0.763)
7 *	GTTAATCA	1e-07	-16.62	0.4054	0.0801	60.5bp (57.2bp)	Pdx1(Homeobox)/Islet-Pdx1-ChIP-Seq(SRA008281)/Homer(0.815)
8 *	TTCACAGGTGAC	1e-06	-15.31	0.2162	0.0176	60.9bp (75.1bp)	USF2/MA0526.1/Jaspar(0.725)
9 *	GTCACCAA	1e-05	-11.54	0.2703	0.05	40.6bp (82.9bp)	NRL/MA0842.1/Jaspar(0.690)

## Sheet: S2B 5x closed
Non-promoter regions
Rank	Motif	P-value	log P-pvalue	% of Targets	% of Background	STD(Bg STD)	Best Match/Details
1	AATGACTCATCC	1e-44	-102.9	0.261	0.037	51.3bp (80.9bp)	Jun-AP1(bZIP)/K562-cJun-ChIP-Seq(GSE31477)/Homer(0.970)
2	TGTCTGGGCTTG	1e-29	-68.77	0.3553	0.1106	47.4bp (85.1bp)	p53(p53)/mES-cMyc-ChIP-Seq(GSE11431)/Homer(0.790)
3	AAGGCATGCC	1e-24	-57.28	0.5031	0.2331	51.6bp (85.2bp)	PB0180.1_Sp4_2/Jaspar(0.706)
4	TCCTTGGCAA	1e-21	-49.54	0.5	0.2475	58.4bp (82.5bp)	NF1-halfsite(CTF)/LNCaP-NF1-ChIP-Seq(Unpublished)/Homer(0.878)
5	AGGAGTGG	1e-18	-42.63	0.3648	0.1584	50.6bp (81.9bp)	SP3/MA0746.1/Jaspar(0.851)
6	GTGCTGGCAT	1e-15	-34.71	0.3365	0.1546	52.8bp (84.4bp)	Hic1/MA0739.1/Jaspar(0.745)
7	AACCTGTT	1e-14	-33.54	0.2421	0.092	56.6bp (78.0bp)	GRHL1/MA0647.1/Jaspar(0.801)
8	ACATGTCCTGAC	1e-12	-29.24	0.0629	0.0069	59.5bp (74.0bp)	TP73/MA0861.1/Jaspar(0.678)
9 *	GCTTAAGCAA	1e-11	-26.8	0.1289	0.0358	59.4bp (77.0bp)	MF0006.1_bZIP_cEBP-like_subclass/Jaspar(0.677)
10 *	AATGCCTTGTCT	1e-11	-26.13	0.0157	0.0001	51.0bp (20.0bp)	PB0166.1_Sox12_2/Jaspar(0.672)
Promoter regions
Rank	Motif	P-value	log P-pvalue	% of Targets	% of Background	STD(Bg STD)	Best Match/Details
1 *	ACCCTTCCGCTC	1e-11	-26.37	0.2692	0.0034	37.8bp (55.5bp)	POL001.1_MTE/Jaspar(0.660)
2 *	CAATCAGGGACG	1e-11	-25.72	0.2692	0.0038	40.0bp (68.6bp)	Dux/MA0611.1/Jaspar(0.689)
3 *	CCTTAAACGGGA	1e-08	-20.59	0.1538	0.0005	74.9bp (74.9bp)	IRF4(IRF)/GM12878-IRF4-ChIP-Seq(GSE32465)/Homer(0.616)
4 *	ATCCAATC	1e-08	-18.62	0.3462	0.025	36.3bp (64.1bp)	POL004.1_CCAAT-box/Jaspar(0.847)
5 *	GCAGGAGTCGTT	1e-07	-17.25	0.2308	0.0074	71.9bp (67.9bp)	PB0117.1_Eomes_2/Jaspar(0.695)
6 *	ACCAGCAGTTCC	1e-07	-16.77	0.2308	0.008	53.2bp (70.4bp)	PB0196.1_Zbtb7b_2/Jaspar(0.653)
7 *	GTAGGGATGTGC	1e-07	-16.16	0.1538	0.0016	28.9bp (71.7bp)	PB0170.1_Sox17_2/Jaspar(0.593)
8 *	GAGCATGCAA	1e-06	-15.75	0.0769	0	0.0bp (25.4bp)	POU2F2/MA0507.1/Jaspar(0.640)
9 *	CTAGCTCTGCCT	1e-06	-15.48	0.2308	0.01	62.5bp (73.0bp)	ZNF519(Zf)/HEK293-ZNF519.GFP-ChIP-Seq(GSE58341)/Homer(0.729)
10 *	TAGGAGCAGGGG	1e-05	-13.58	0.3846	0.0598	60.7bp (68.4bp)	PB0039.1_Klf7_1/Jaspar(0.651)
