# Supplementary material for: Identification of a primitive intestinal transcription factor network shared between esophageal adenocarcinoma and its precancerous precursor state
Source: Genome Res. 2019 May;29(5):723–36. doi: 10.1101/gr.243345.118 (PMC6499311; doi:10.1101/gr.243345.118)
Supplement: Supplemental Material [file supp_gr.243345.118_Supplemental_Table_S3.xlsx]

## Sheet: Legend
Table S3. HNF4A and GATA6 binding regions identified by ChIP-seq . Genomic regions identified by ChIP-seq for HNF4A (A) or GATA6 (B) binding.

## Sheet: S3A HNF4A ChIPseq
Chr	Start	End	Peak Score	Focus Ratio/Region Size	Annotation	Detailed Annotation	Distance to TSS	Nearest PromoterID	Entrez ID	Nearest Unigene	Nearest Refseq	Nearest Ensembl	Gene Name	Gene Alias	Gene Description	Gene Type
chr22	43150750	43151003	41	NA	Intergenic	Charlie25|DNA|hAT-Charlie	-34000	NM_017436	53947	Hs.105956	XM_005261643	ENSG00000128274	A4GALT	A14GALT|A4GALT1|Gb3S|P(k)|P1|P1PK|PK	alpha 1,4-galactosyltransferase	protein-coding
chr3	151533964	151534312	70	NA	intron (NM_001086, intron 1 of 4)	L2b|LINE|L2	2277	NM_001086	13	Hs.506908	XM_005247103	ENSG00000114771	AADAC	CES5A1|DAC	arylacetamide deacetylase	protein-coding
chr4	171227451	171227750	119	NA	Intergenic	Intergenic	-216062	NM_001286683	51166	Hs.529735	XM_005263044	ENSG00000109576	AADAT	KAT2|KATII	aminoadipate aminotransferase	protein-coding
chr2	69842240	69842586	128	NA	intron (NM_014911, intron 2 of 21)	intron (NM_014911, intron 2 of 21)	28564	NM_014911	22848	Hs.468878	XM_005264206		AAK1	RP11-427H3.3	AP2 associated kinase 1	protein-coding
chr2	69852196	69852495	66	NA	intron (NM_014911, intron 2 of 21)	Tigger15a|DNA|TcMar-Tigger	18632	NM_014911	22848	Hs.468878	XM_005264206		AAK1	RP11-427H3.3	AP2 associated kinase 1	protein-coding
chr17	79105710	79106010	92	NA	promoter-TSS (NM_004920)	promoter-TSS (NM_004920)	-112	NM_004920	9625	Hs.514575	XM_005257847	ENSG00000181409	AATK	AATYK|AATYK1|LMR1|LMTK1|p35BP	apoptosis-associated tyrosine kinase	protein-coding
chr9	107689978	107690297	104	NA	intron (NM_005502, intron 1 of 49)	CpG	390	NM_005502	19	Hs.659274	XM_005251773	ENSG00000165029	ABCA1	ABC-1|ABC1|CERP|HDLDT1|TGD	ATP-binding cassette, sub-family A (ABC1), member 1	protein-coding
chr7	48183739	48184265	298	NA	Intergenic	LTR22A|LTR|ERVK	-27055	NM_152701	154664	Hs.745575	XM_005249623	ENSG00000179869	ABCA13	-	ATP-binding cassette, sub-family A (ABC1), member 13	protein-coding
chr7	48179530	48180011	128	NA	Intergenic	LTR22A|LTR|ERVK	-31287	NM_152701	154664	Hs.745575	XM_005249623	ENSG00000179869	ABCA13	-	ATP-binding cassette, sub-family A (ABC1), member 13	protein-coding
chr17	67043276	67043985	437	NA	intron (NM_080283, intron 3 of 38)	LTR4|LTR|ERV1	13506	NM_080283	10350	Hs.131686	XM_005256934	ENSG00000154258	ABCA9	EST640918	ATP-binding cassette, sub-family A (ABC1), member 9	protein-coding
chr2	169868649	169868977	87	NA	intron (NM_003742, intron 5 of 27)	intron (NM_003742, intron 5 of 27)	19020	NM_003742	8647	Hs.658439	XM_005246930	ENSG00000073734	ABCB11	ABC16|BRIC2|BSEP|PFIC-2|PFIC2|PGY4|SPGP	ATP-binding cassette, sub-family B (MDR/TAP), member 11	protein-coding
chr12	123435955	123436387	367	NA	intron (NM_019624, intron 2 of 10)	intron (NM_019624, intron 2 of 10)	14885	NM_203444	23457	Hs.511951	XM_005253558	ENSG00000150967	ABCB9	EST122234|TAPL	ATP-binding cassette, sub-family B (MDR/TAP), member 9	protein-coding
chr16	48238458	48238879	488	NA	intron (NM_032583, intron 13 of 29)	intron (NM_032583, intron 13 of 29)	27514	NM_033151	85320	Hs.652267	XM_005256208	ENSG00000121270	ABCC11	EWWD|MRP8|WW	ATP-binding cassette, sub-family C (CFTR/MRP), member 11	protein-coding
chr10	101609249	101609612	188	NA	intron (NM_000392, intron 30 of 31)	intron (NM_000392, intron 30 of 31)	66967	NM_000392	1244	Hs.368243	XM_005269536	ENSG00000023839	ABCC2	ABC30|CMOAT|DJS|MRP2|cMRP	ATP-binding cassette, sub-family C (CFTR/MRP), member 2	protein-coding
chr10	101542232	101542603	138	NA	promoter-TSS (NM_000392)	promoter-TSS (NM_000392)	-46	NM_000392	1244	Hs.368243	XM_005269536	ENSG00000023839	ABCC2	ABC30|CMOAT|DJS|MRP2|cMRP	ATP-binding cassette, sub-family C (CFTR/MRP), member 2	protein-coding
chr13	95775733	95776481	1502	NA	intron (NM_001105515, intron 19 of 20)	intron (NM_001105515, intron 19 of 20)	177580	NM_001105515	10257	Hs.508423	XM_005254025	ENSG00000125257	ABCC4	EST170205|MOAT-B|MOATB|MRP4	ATP-binding cassette, sub-family C (CFTR/MRP), member 4	protein-coding
chr13	95740025	95740506	142	NA	intron (NM_005845, intron 20 of 30)	intron (NM_005845, intron 20 of 30)	213422	NM_001105515	10257	Hs.508423	XM_005254025	ENSG00000125257	ABCC4	EST170205|MOAT-B|MOATB|MRP4	ATP-binding cassette, sub-family C (CFTR/MRP), member 4	protein-coding
chr13	95767784	95768009	42	NA	intron (NM_001105515, intron 20 of 20)	intron (NM_001105515, intron 20 of 20)	185791	NM_001105515	10257	Hs.508423	XM_005254025	ENSG00000125257	ABCC4	EST170205|MOAT-B|MOATB|MRP4	ATP-binding cassette, sub-family C (CFTR/MRP), member 4	protein-coding
chr1	94883507	94884012	526	NA	promoter-TSS (NM_001122674)	promoter-TSS (NM_001122674)	-174	NM_002858	5825	Hs.700576	XM_005271087	ENSG00000117528	ABCD3	ABC43|PMP70|PXMP1|ZWS2	ATP-binding cassette, sub-family D (ALD), member 3	protein-coding
chr1	94849592	94849951	194	NA	Intergenic	Intergenic	-34162	NM_002858	5825	Hs.700576	XM_005271087	ENSG00000117528	ABCD3	ABC43|PMP70|PXMP1|ZWS2	ATP-binding cassette, sub-family D (ALD), member 3	protein-coding
chr1	94808150	94808400	31	NA	Intergenic	LTR33|LTR|ERVL	-75658	NM_002858	5825	Hs.700576	XM_005271087	ENSG00000117528	ABCD3	ABC43|PMP70|PXMP1|ZWS2	ATP-binding cassette, sub-family D (ALD), member 3	protein-coding
chr4	89028561	89029296	806	NA	intron (NM_001257386, intron 9 of 15)	intron (NM_001257386, intron 9 of 15)	51083	NM_004827	9429	Hs.480218	XM_005263354	ENSG00000118777	ABCG2	ABC15|ABCP|BCRP|BCRP1|BMDP|CD338|CDw338|EST157481|GOUT1|MRX|MXR|MXR1|UAQTL1	ATP-binding cassette, sub-family G (WHITE), member 2	protein-coding
chr4	89030484	89030949	110	NA	intron (NM_001257386, intron 9 of 15)	intron (NM_001257386, intron 9 of 15)	49295	NM_004827	9429	Hs.480218	XM_005263354	ENSG00000118777	ABCG2	ABC15|ABCP|BCRP|BCRP1|BMDP|CD338|CDw338|EST157481|GOUT1|MRX|MXR|MXR1|UAQTL1	ATP-binding cassette, sub-family G (WHITE), member 2	protein-coding
chr4	89111350	89111695	66	NA	intron (NM_001257386, intron 1 of 15)	intron (NM_001257386, intron 1 of 15)	-31511	NM_004827	9429	Hs.480218	XM_005263354	ENSG00000118777	ABCG2	ABC15|ABCP|BCRP|BCRP1|BMDP|CD338|CDw338|EST157481|GOUT1|MRX|MXR|MXR1|UAQTL1	ATP-binding cassette, sub-family G (WHITE), member 2	protein-coding
chr20	25359013	25359530	218	NA	intron (NM_001042472, intron 1 of 12)	intron (NM_001042472, intron 1 of 12)	12347	NM_015600	26090	Hs.441550	XM_005260698	ENSG00000100997	ABHD12	ABHD12A|BEM46L2|C20orf22|PHARC|dJ965G21.2	abhydrolase domain containing 12	protein-coding
chr15	80976965	80977527	504	NA	Intergenic	MIRb|SINE|MIR	-10406	NM_021214	58489	Hs.459072	XM_005254573	ENSG00000136379	ABHD17C	FAM108C1	abhydrolase domain containing 17C	protein-coding
chr15	89655308	89656035	530	NA	intron (NM_007011, intron 5 of 14)	intron (NM_007011, intron 5 of 14)	24290	NM_152924	11057	Hs.122337	XM_005254832	ENSG00000140526	ABHD2	HS1-2|LABH2|PHPS1-2	abhydrolase domain containing 2	protein-coding
chr15	89664686	89664987	170	NA	intron (NM_152924, intron 3 of 10)	intron (NM_152924, intron 3 of 10)	33455	NM_152924	11057	Hs.122337	XM_005254832	ENSG00000140526	ABHD2	HS1-2|LABH2|PHPS1-2	abhydrolase domain containing 2	protein-coding
chr15	89644445	89644994	58	NA	intron (NM_007011, intron 2 of 14)	intron (NM_007011, intron 2 of 14)	13338	NM_152924	11057	Hs.122337	XM_005254832	ENSG00000140526	ABHD2	HS1-2|LABH2|PHPS1-2	abhydrolase domain containing 2	protein-coding
chr15	89644445	89644994	55	NA	intron (NM_007011, intron 2 of 14)	intron (NM_007011, intron 2 of 14)	13338	NM_152924	11057	Hs.122337	XM_005254832	ENSG00000140526	ABHD2	HS1-2|LABH2|PHPS1-2	abhydrolase domain containing 2	protein-coding
chr15	89658868	89659073	46	NA	intron (NM_152924, intron 2 of 10)	intron (NM_152924, intron 2 of 10)	27589	NM_152924	11057	Hs.122337	XM_005254832	ENSG00000140526	ABHD2	HS1-2|LABH2|PHPS1-2	abhydrolase domain containing 2	protein-coding
chr14	23137668	23137913	69	NA	Intergenic	Intergenic	70643	NM_022060	63874	Hs.445665	XM_005267986	ENSG00000100439	ABHD4	ABH4	abhydrolase domain containing 4	protein-coding
chr3	58232363	58232698	149	NA	intron (NM_020676, intron 1 of 8)	intron (NM_020676, intron 1 of 8)	9271	NM_020676	57406	Hs.476454	XM_005265334	ENSG00000163686	ABHD6	-	abhydrolase domain containing 6	protein-coding
chr3	58235244	58235519	103	NA	intron (NM_020676, intron 1 of 8)	intron (NM_020676, intron 1 of 8)	12122	NM_020676	57406	Hs.476454	XM_005265334	ENSG00000163686	ABHD6	-	abhydrolase domain containing 6	protein-coding
chr1	179121067	179121672	104	NA	intron (NM_007314, intron 1 of 11)	intron (NM_007314, intron 1 of 11)	-9145	NM_001136000	27	Hs.159472	XM_005245088	ENSG00000143322	ABL2	ABLL|ARG	c-abl oncogene 2, non-receptor tyrosine kinase	protein-coding
chr10	116444423	116445047	471	NA	promoter-TSS (NM_001003408)	promoter-TSS (NM_001003408)	-321	NM_001003407	3983	Hs.593868	XM_005269818	ENSG00000099204	ABLIM1	ABLIM|LIMAB1|LIMATIN|abLIM-1	actin binding LIM protein 1	protein-coding
chr10	116259603	116259910	102	NA	intron (NM_001003407, intron 6 of 21)	intron (NM_001003407, intron 6 of 21)	26929	NM_006720	3983	Hs.593868	XM_005269818	ENSG00000099204	ABLIM1	ABLIM|LIMAB1|LIMATIN|abLIM-1	actin binding LIM protein 1	protein-coding
chr10	116384889	116385117	65	NA	intron (NM_001003407, intron 1 of 21)	L3b|LINE|CR1	33055	NM_002313	3983	Hs.593868	XM_005269818	ENSG00000099204	ABLIM1	ABLIM|LIMAB1|LIMATIN|abLIM-1	actin binding LIM protein 1	protein-coding
chr4	8115002	8115407	455	NA	intron (NM_001130084, intron 1 of 19)	intron (NM_001130084, intron 1 of 19)	-41461	NM_001286688	84448	Hs.233404	XM_005248014	ENSG00000163995	ABLIM2	-	actin binding LIM protein family, member 2	protein-coding
chr9	136156018	136156364	102	NA	Intergenic	HERVIP10F-int|LTR|ERV1	-5561	NM_020469	28	Hs.654423	XM_005276848		ABO	A3GALNT|A3GALT1|GTB|NAGAT	ABO blood group (transferase A, alpha 1-3-N-acetylgalactosaminyltransferase; transferase B, alpha 1-3-galactosyltransferase)	protein-coding
chr9	136127207	136128157	51	NA	Intergenic	Intergenic	22948	NM_020469	28	Hs.654423	XM_005276848		ABO	A3GALNT|A3GALT1|GTB|NAGAT	ABO blood group (transferase A, alpha 1-3-N-acetylgalactosaminyltransferase; transferase B, alpha 1-3-galactosyltransferase)	protein-coding
chr9	136127207	136128157	22	NA	Intergenic	Intergenic	22948	NM_020469	28	Hs.654423	XM_005276848		ABO	A3GALNT|A3GALT1|GTB|NAGAT	ABO blood group (transferase A, alpha 1-3-N-acetylgalactosaminyltransferase; transferase B, alpha 1-3-galactosyltransferase)	protein-coding
chr17	1013384	1013774	281	NA	intron (NM_001159746, intron 2 of 22)	intron (NM_001159746, intron 2 of 22)	-1239	NM_001092	29	Hs.159306	NM_001092	ENSG00000159842	ABR	MDB	active BCR-related	protein-coding
chr17	1116832	1117140	200	NA	Intergenic	Intergenic	-26370	NM_001159746	29	Hs.159306	NM_001092	ENSG00000159842	ABR	MDB	active BCR-related	protein-coding
chr6	26571957	26572211	106	NA	Intergenic	Intergenic	-25087	NM_013375	29777	Hs.254406	NM_013375	ENSG00000146109	ABT1	hABT1	activator of basal transcription 1	protein-coding
chr11	34339790	34340670	651	NA	intron (NM_145804, intron 1 of 16)	intron (NM_145804, intron 1 of 16)	39325	NM_145804	25841	Hs.23361	NM_145804	ENSG00000166016	ABTB2	ABTB2A|BTBD22	ankyrin repeat and BTB (POZ) domain containing 2	protein-coding
chr19	36284271	36284618	183	NA	intron (NR_104176, intron 1 of 7)	intron (NR_104176, intron 1 of 7)	4367	NR_104176	644050	Hs.651888	XR_243989	ENSG00000225872	AC002398.5	-	uncharacterized LOC644050	ncRNA
chr19	35911054	35911717	852	NA	Intergenic	MLT1N2|LTR|ERVL-MaLR	14876	NR_040046	100128682	Hs.570008	NR_040046	ENSG00000205786	AC002511.1	-	uncharacterized LOC100128682	ncRNA
chr19	35879492	35879973	320	NA	Intergenic	LTR8A|LTR|ERV1	-16777	NR_040046	100128682	Hs.570008	NR_040046	ENSG00000205786	AC002511.1	-	uncharacterized LOC100128682	ncRNA
chr17	39560267	39560790	91	NA	intron (NR_040111, intron 1 of 2)	intron (NR_040111, intron 1 of 2)	1860	NR_040111	100505782	Hs.463024	NR_040111	ENSG00000234859	AC003958.2	-	uncharacterized LOC100505782	ncRNA
chr7	84331077	84331732	2303	NA	Intergenic	MLT2B5|LTR|ERVL	169612	NR_110079	101927378	Hs.539042	XR_242309	ENSG00000235139	AC003984.1	-	uncharacterized LOC101927378	ncRNA
chr7	20009641	20010252	1405	NA	intron (NR_110114, intron 3 of 5)	L2a|LINE|L2	170103	NR_110114	101927668	Hs.715900	XR_242136	ENSG00000243004	AC005062.2	-	uncharacterized LOC101927668	ncRNA
chr2	39731150	39731826	112	NA	intron (NR_037875, intron 3 of 5)	MER96|DNA|hAT	66931	NR_037875	728730	Hs.655344	XR_244956	ENSG00000231312	AC007246.3	-	uncharacterized LOC728730	ncRNA
chr2	39695033	39695366	106	NA	intron (NR_037875, intron 3 of 5)	intron (NR_037875, intron 3 of 5)	30642	NR_037875	728730	Hs.655344	XR_244956	ENSG00000231312	AC007246.3	-	uncharacterized LOC728730	ncRNA
chr2	67267436	67267639	118	NA	Intergenic	MIR|SINE|MIR	135969	NR_110169	101060019	Hs.116425	XR_171080		AC007403.2	-	uncharacterized LOC101060019	ncRNA
chr2	162964179	162964448	58	NA	Intergenic	LTR40a|LTR|ERVL	-6638	NR_110255	101929532	Hs.639883	XR_241339	ENSG00000236841	AC007750.5	-	uncharacterized LOC101929532	ncRNA
chr2	64996457	64997038	775	NA	Intergenic	Intergenic	94018	NR_110224	101927438	Hs.580313	XR_245011		AC007880.1	-	uncharacterized LOC101927438	ncRNA
chr2	65048829	65049198	138	NA	Intergenic	LTR48B|LTR|ERV1	41752	NR_110224	101927438	Hs.580313	XR_245011		AC007880.1	-	uncharacterized LOC101927438	ncRNA
chr2	65058390	65058712	53	NA	Intergenic	Intergenic	32214	NR_110224	101927438	Hs.580313	XR_245011		AC007880.1	-	uncharacterized LOC101927438	ncRNA
chr5	158769028	158769273	76	NA	intron (NR_037889, intron 2 of 4)	L2b|LINE|L2	10624	NR_037889	285626	Hs.449275	NR_037889	ENSG00000249738	AC008697.1	-	uncharacterized LOC285626	ncRNA
chr16	74030925	74031264	128	NA	Intergenic	Intergenic	218326	NR_104657	101928035	Hs.39557	XR_243472	ENSG00000261404	AC009120.4	-	uncharacterized LOC101928035	ncRNA
chr2	68118759	68119183	252	NA	Intergenic	Intergenic	-66277	NR_110271	101927701	Hs.348697	XR_245019	ENSG00000237013	AC010987.6	-	uncharacterized LOC101927701	ncRNA
chr2	8749457	8749988	1505	NA	Intergenic	Intergenic	-25800	NR_110257	101929567	Hs.634706	XR_241264	ENSG00000236008	AC011747.4	-	uncharacterized LOC101929567	ncRNA
chr2	8767769	8768274	415	NA	Intergenic	Intergenic	-44099	NR_110257	101929567	Hs.634706	XR_241264	ENSG00000236008	AC011747.4	-	uncharacterized LOC101929567	ncRNA
chr2	8617132	8617557	232	NA	Intergenic	Intergenic	106578	NR_110257	101929567	Hs.634706	XR_241264	ENSG00000236008	AC011747.4	-	uncharacterized LOC101929567	ncRNA
chr2	8615519	8615768	114	NA	Intergenic	Intergenic	108279	NR_110257	101929567	Hs.634706	XR_241264	ENSG00000236008	AC011747.4	-	uncharacterized LOC101929567	ncRNA
chr2	8679334	8679631	25	NA	Intergenic	Intergenic	44440	NR_110257	101929567	Hs.634706	XR_241264	ENSG00000236008	AC011747.4	-	uncharacterized LOC101929567	ncRNA
chr2	8796551	8796766	49	NA	Intergenic	Intergenic	25333	NR_110153	100506299	Hs.659481	XR_108388		AC011747.7	-	uncharacterized LOC100506299	ncRNA
chr2	81639871	81640261	233	NA	Intergenic	Intergenic	54004	NR_110161	100507201	Hs.98589	XR_109949		AC012075.2	-	uncharacterized LOC100507201	ncRNA
chr7	17658274	17658518	38	NA	Intergenic	Intergenic	-59863	NR_110013	101927630	Hs.583400	XR_242134		AC017060.1	-	uncharacterized LOC101927630	ncRNA
chr7	112629545	112629901	133	NA	intron (NR_110162, intron 1 of 5)	intron (NR_110162, intron 1 of 5)	5975	NR_110162	101928036	Hs.120006	XR_242330		AC018464.3	-	uncharacterized LOC101928036	ncRNA
chr7	50564652	50564938	37	NA	intron (NM_000790, intron 8 of 14)	intron (NM_000790, intron 8 of 14)	-34662	NR_033845	100129427	Hs.680434	NR_033845	ENSG00000226122	AC018705.5	-	uncharacterized LOC100129427	ncRNA
chr2	22278721	22279039	161	NA	Intergenic	Intergenic	-345356	NR_038837	645949	Hs.742487	NR_038837	ENSG00000229621	AC018742.1	-	uncharacterized LOC645949	ncRNA
chr2	197141138	197141486	367	NA	intron (NM_020760, intron 15 of 28)	intron (NM_020760, intron 15 of 28)	16564	NR_110226	101927482	Hs.191841	XR_241372	ENSG00000229056	AC020571.3	-	uncharacterized LOC101927482	ncRNA
chr7	137638741	137639072	147	NA	intron (NM_001243523, intron 1 of 3)	intron (NM_001243523, intron 1 of 3)	812	NM_001243523	100130880	Hs.712161	NM_001243523		AC022173.2	-	uncharacterized LOC100130880	protein-coding
chr7	137625536	137625736	103	NA	intron (NM_001253775, intron 1 of 3)	intron (NM_001253775, intron 1 of 3)	-12458	NM_001243523	100130880	Hs.712161	NM_001243523		AC022173.2	-	uncharacterized LOC100130880	protein-coding
chr7	130584471	130584985	560	NA	intron (NR_034120, intron 2 of 3)	intron (NR_034120, intron 2 of 3)	13341	NR_034120	646329	Hs.150556	XR_242260	ENSG00000226380	AC058791.1	-	uncharacterized LOC646329	ncRNA
chr11	45000437	45001013	152	NA	Intergenic	Intergenic	5272	NR_026681	221122	Hs.551656	NR_026681	ENSG00000254654	AC068858.1	-	uncharacterized LOC221122	ncRNA
chr7	155939821	155940302	768	NA	Intergenic	Intergenic	298221	NR_038232	285889	Hs.407095	NR_038232	ENSG00000233878	AC073133.1	-	uncharacterized LOC285889	ncRNA
chr2	47536934	47537769	978	NA	intron (NR_110207, intron 1 of 2)	intron (NR_110207, intron 1 of 2)	34862	NR_110207	101927043	Hs.515976	XR_244999	ENSG00000234690	AC073283.4	-	uncharacterized LOC101927043	ncRNA
chr2	47498342	47498796	128	NA	intron (NR_110207, intron 1 of 2)	MER34A1|LTR|ERV1	73644	NR_110207	101927043	Hs.515976	XR_244999	ENSG00000234690	AC073283.4	-	uncharacterized LOC101927043	ncRNA
chr2	47567009	47567355	52	NA	intron (NR_110208, intron 1 of 4)	intron (NR_110208, intron 1 of 4)	5031	NR_110207	101927043	Hs.515976	XR_244999	ENSG00000234690	AC073283.4	-	uncharacterized LOC101927043	ncRNA
chr2	67504520	67504839	205	NA	Intergenic	Intergenic	-62228	NR_038844	644838	Hs.145561	NR_038844	ENSG00000236780	AC078941.1	-	uncharacterized LOC644838	ncRNA
chr2	77255153	77255540	224	NA	intron (NM_001134745, intron 3 of 3)	intron (NM_001134745, intron 3 of 3)	42255	NR_110284	101927907	Hs.382185	XR_245027	ENSG00000234653	AC079117.1	-	uncharacterized LOC101927907	ncRNA
chr2	130569736	130570041	255	NA	Intergenic	Intergenic	-110862	NR_110285	101927924	Hs.570248	XR_244851	ENSG00000237574	AC079776.3	-	uncharacterized LOC101927924	ncRNA
chr3	7546273	7546934	1409	NA	intron (NM_000844, intron 7 of 9)	MSTD-int|LTR|ERVL-MaLR	511391	NR_110131	101927394	Hs.517767	XR_245179	ENSG00000227110	AC087859.1	-	uncharacterized LOC101927394	ncRNA
chr3	194575786	194576233	554	NA	Intergenic	Intergenic	146859	NR_037891	100507391	Hs.590099	NR_037891	ENSG00000237222	AC090505.6	-	uncharacterized LOC100507391	ncRNA
chr3	194443195	194443758	426	NA	intron (NR_037891, intron 1 of 3)	intron (NR_037891, intron 1 of 3)	14326	NR_037891	100507391	Hs.590099	NR_037891	ENSG00000237222	AC090505.6	-	uncharacterized LOC100507391	ncRNA
chr7	1216029	1216240	92	NA	Intergenic	Intergenic	15713	NR_110070	101927021	Hs.529566	XR_242116		AC091729.9	-	uncharacterized LOC101927021	ncRNA
chr2	28431952	28432661	768	NA	intron (NM_001261840, intron 7 of 11)	intron (NM_001261840, intron 7 of 11)	101020	NR_038319	100505716	Hs.679092	NR_038319	ENSG00000223522	AC093690.1	-	uncharacterized LOC100505716	ncRNA
chr2	28473582	28474017	234	NA	intron (NM_001261840, intron 10 of 11)	intron (NM_001261840, intron 10 of 11)	59527	NR_038319	100505716	Hs.679092	NR_038319	ENSG00000223522	AC093690.1	-	uncharacterized LOC100505716	ncRNA
chr2	28492062	28492618	139	NA	intron (NM_001261840, intron 10 of 11)	intron (NM_001261840, intron 10 of 11)	40986	NR_038319	100505716	Hs.679092	NR_038319	ENSG00000223522	AC093690.1	-	uncharacterized LOC100505716	ncRNA
chr2	28492062	28492618	47	NA	intron (NM_001261840, intron 10 of 11)	intron (NM_001261840, intron 10 of 11)	40986	NR_038319	100505716	Hs.679092	NR_038319	ENSG00000223522	AC093690.1	-	uncharacterized LOC100505716	ncRNA
chr7	47644537	47644855	94	NA	Intergenic	Intergenic	-16841	NR_108090	101929086	Hs.563487	XR_242177	ENSG00000236078	AC095067.1	-	uncharacterized LOC101929086	ncRNA
chr2	231570722	231571325	837	NA	Intergenic	Intergenic	-5779	NR_040038	151475	Hs.528154	NR_040038	ENSG00000226125	AC098823.3	-	uncharacterized LOC151475	ncRNA
chr2	231552191	231552513	28	NA	Intergenic	GA-rich|Low_complexity|Low_complexity	12892	NR_040038	151475	Hs.528154	NR_040038	ENSG00000226125	AC098823.3	-	uncharacterized LOC151475	ncRNA
chr7	20343983	20344388	172	NA	intron (NR_110117, intron 3 of 4)	MER67A|LTR|ERV1	7854	NR_110117	101927769	Hs.256080	XR_242139	ENSG00000226097	AC099342.1	-	uncharacterized LOC101927769	ncRNA
chr2	42087068	42087913	230	NA	Intergenic	AluSz|SINE|Alu	-17205	NR_033996	388942	Hs.631883	NR_033996	ENSG00000214691	AC104654.1	-	uncharacterized LOC388942	ncRNA
chr2	42093098	42093502	84	NA	Intergenic	Intergenic	-11395	NR_033996	388942	Hs.631883	NR_033996	ENSG00000214691	AC104654.1	-	uncharacterized LOC388942	ncRNA
chr17	71794223	71794725	807	NA	intron (NR_040020, intron 5 of 6)	intron (NR_040020, intron 5 of 6)	11513	NR_040020	400620	Hs.348644	NR_040020	ENSG00000234721	AC125421.1	-	uncharacterized LOC400620	ncRNA
chr17	71782184	71782732	522	NA	promoter-TSS (NR_040020)	promoter-TSS (NR_040020)	-503	NR_040020	400620	Hs.348644	NR_040020	ENSG00000234721	AC125421.1	-	uncharacterized LOC400620	ncRNA
chr3	38175000	38175369	377	NA	intron (NM_001607, intron 3 of 11)	intron (NM_001607, intron 3 of 11)	3549	NR_024024	30	Hs.643487	NM_001130410	ENSG00000060971	ACAA1	ACAA|PTHIO|THIO	acetyl-CoA acyltransferase 1	protein-coding
chr1	226315329	226316086	1815	NA	Intergenic	Intergenic	58716	NM_022735	64746	Hs.520207	NM_022735	ENSG00000182827	ACBD3	GCP60|GOCAP1|GOLPH1|PAP7	acyl-CoA binding domain containing 3	protein-coding
chr1	226322940	226323409	241	NA	Intergenic	Intergenic	51249	NM_022735	64746	Hs.520207	NM_022735	ENSG00000182827	ACBD3	GCP60|GOCAP1|GOLPH1|PAP7	acyl-CoA binding domain containing 3	protein-coding
chr9	19397917	19398310	162	NA	Intergenic	Intergenic	-10812	NM_001010887	340485	Hs.41379	XM_005251447		ACER2	ALKCDase2|ASAH3L	alkaline ceramidase 2	protein-coding
chr11	76550326	76550832	251	NA	Intergenic	MLT1G1|LTR|ERVL-MaLR	-21338	NM_018367	55331	Hs.23862	XM_005274086		ACER3	APHC|PHCA	alkaline ceramidase 3	protein-coding
chr14	23564773	23565116	50	NA	promoter-TSS (NM_001164814)	promoter-TSS (NM_001164814)	-121	NM_001164815	22985	Hs.124490	XM_005267415	ENSG00000100813	ACIN1	ACINUS|ACN|fSAP152	apoptotic chromatin condensation inducer 1	protein-coding
chr3	42870431	42871124	477	NA	intron (NM_001296, intron 2 of 2)	intron (NM_001296, intron 2 of 2)	19813	NM_001296	1238	Hs.146346	XM_005264856	ENSG00000144648	ACKR2	CCBP2|CCR10|CCR9|CMKBR9|D6|hD6	atypical chemokine receptor 2	protein-coding
chr7	96863693	96864091	138	NA	Intergenic	MER11A|LTR|ERVK	117987	NM_020186	57001	Hs.592269	NM_020186	ENSG00000196636	ACN9	-	ACN9 homolog (S. cerevisiae)	protein-coding
chr3	58521584	58522073	583	NA	intron (NM_003500, intron 1 of 14)	intron (NM_003500, intron 1 of 14)	1101	NM_003500	8309	Hs.444959	XM_005265505	ENSG00000168306	ACOX2	BCOX|BRCACOX|BRCOX|THCCox	acyl-CoA oxidase 2, branched chain	protein-coding
chr16	89169582	89170233	698	NA	intron (NM_174917, intron 4 of 10)	intron (NM_174917, intron 4 of 10)	9690	NM_174917	197322	Hs.720526	XM_005256293	ENSG00000176715	ACSF3	-	acyl-CoA synthetase family member 3	protein-coding
chr16	89166248	89166520	103	NA	intron (NM_174917, intron 2 of 10)	AluJo|SINE|Alu	6167	NM_174917	197322	Hs.720526	XM_005256293	ENSG00000176715	ACSF3	-	acyl-CoA synthetase family member 3	protein-coding
chr2	223660809	223661700	153	NA	Intergenic	Intergenic	-64478	NM_004457	2181	Hs.655772	NM_004457		ACSL3	ACS3|FACL3|PRO2194	acyl-CoA synthetase long-chain family member 3	protein-coding
chr2	223660809	223661700	48	NA	Intergenic	Intergenic	-64478	NM_004457	2181	Hs.655772	NM_004457		ACSL3	ACS3|FACL3|PRO2194	acyl-CoA synthetase long-chain family member 3	protein-coding
chr10	114139385	114140141	168	NA	intron (NM_016234, intron 1 of 20)	intron (NM_016234, intron 1 of 20)	3807	NM_016234	51703	Hs.11638	XM_005269897	ENSG00000197142	ACSL5	ACS2|ACS5|FACL5	acyl-CoA synthetase long-chain family member 5	protein-coding
chr10	114139385	114140141	56	NA	intron (NM_016234, intron 1 of 20)	intron (NM_016234, intron 1 of 20)	3807	NM_016234	51703	Hs.11638	XM_005269897	ENSG00000197142	ACSL5	ACS2|ACS5|FACL5	acyl-CoA synthetase long-chain family member 5	protein-coding
chr10	114143078	114143346	55	NA	intron (NM_016234, intron 1 of 20)	intron (NM_016234, intron 1 of 20)	7256	NM_016234	51703	Hs.11638	XM_005269897	ENSG00000197142	ACSL5	ACS2|ACS5|FACL5	acyl-CoA synthetase long-chain family member 5	protein-coding
chr20	25036961	25037273	262	NA	intron (NM_001252677, intron 1 of 11)	intron (NM_001252677, intron 1 of 11)	1701	NM_001252675	84532	Hs.529353	NM_001252675	ENSG00000154930	ACSS1	ACAS2L|ACECS1|AceCS2L	acyl-CoA synthetase short-chain family member 1	protein-coding
chr9	111229866	111230289	373	NA	Intergenic	Intergenic	388198	NM_006686	10880	Hs.534390	NM_006686		ACTL7B	Tact1	actin-like 7B	protein-coding
chr9	111453890	111454264	182	NA	Intergenic	Intergenic	164198	NM_006686	10880	Hs.534390	NM_006686		ACTL7B	Tact1	actin-like 7B	protein-coding
chr9	111232015	111232247	104	NA	Intergenic	Intergenic	386144	NM_006686	10880	Hs.534390	NM_006686		ACTL7B	Tact1	actin-like 7B	protein-coding
chr9	111543780	111544032	101	NA	Intergenic	Intergenic	74369	NM_006686	10880	Hs.534390	NM_006686		ACTL7B	Tact1	actin-like 7B	protein-coding
chr14	69412274	69412683	126	NA	intron (NM_001102, intron 1 of 20)	intron (NM_001102, intron 1 of 20)	33605	NM_001130004	87	Hs.509765	XM_005268149	ENSG00000072110	ACTN1	BDPLT15	actinin, alpha 1	protein-coding
chr14	69531405	69531636	102	NA	intron (NM_001284206, intron 7 of 8)	L2b|LINE|L2	85121	NR_073422	161159	Hs.603341	NR_073422	ENSG00000259062	ACTN1-AS1	C14orf84	ACTN1 antisense RNA 1	ncRNA
chr19	39161240	39161970	1074	NA	intron (NM_004924, intron 1 of 20)	intron (NM_004924, intron 1 of 20)	23338	NM_004924	81	Hs.270291	XM_005259281		ACTN4	ACTININ-4|FSGS|FSGS1	actinin, alpha 4	protein-coding
chr19	39142880	39144168	504	NA	intron (NM_004924, intron 1 of 20)	AluSx1|SINE|Alu	5257	NM_004924	81	Hs.270291	XM_005259281		ACTN4	ACTININ-4|FSGS|FSGS1	actinin, alpha 4	protein-coding
chr19	39142880	39144168	158	NA	intron (NM_004924, intron 1 of 20)	AluSx1|SINE|Alu	5257	NM_004924	81	Hs.270291	XM_005259281		ACTN4	ACTININ-4|FSGS|FSGS1	actinin, alpha 4	protein-coding
chr19	39174361	39175297	60	NA	intron (NM_004924, intron 1 of 20)	MIR|SINE|MIR	36562	NM_004924	81	Hs.270291	XM_005259281		ACTN4	ACTININ-4|FSGS|FSGS1	actinin, alpha 4	protein-coding
chr19	39127384	39127798	48	NA	TTS (NM_013234)	TTS (NM_013234)	-10676	NM_004924	81	Hs.270291	XM_005259281		ACTN4	ACTININ-4|FSGS|FSGS1	actinin, alpha 4	protein-coding
chr2	114635073	114635816	381	NA	intron (NR_110174, intron 1 of 4)	intron (NR_110174, intron 1 of 4)	-12067	NR_102318	10096	Hs.595349	NM_001277140	ENSG00000115091	ACTR3	ARP3	ARP3 actin-related protein 3 homolog (yeast)	protein-coding
chr2	148566987	148567574	573	NA	Intergenic	MIR|SINE|MIR	-34806	NM_001278580	92	Hs.470174	XM_005263843	ENSG00000121989	ACVR2A	ACTRII|ACVR2	activin A receptor, type IIA	protein-coding
chr2	148173718	148174018	227	NA	Intergenic	Intergenic	-428218	NM_001278580	92	Hs.470174	XM_005263843	ENSG00000121989	ACVR2A	ACTRII|ACVR2	activin A receptor, type IIA	protein-coding
chr2	148183056	148183578	152	NA	Intergenic	Plat_L3|LINE|CR1	-418769	NM_001278580	92	Hs.470174	XM_005263843	ENSG00000121989	ACVR2A	ACTRII|ACVR2	activin A receptor, type IIA	protein-coding
chr2	148183056	148183578	32	NA	Intergenic	Plat_L3|LINE|CR1	-418769	NM_001278580	92	Hs.470174	XM_005263843	ENSG00000121989	ACVR2A	ACTRII|ACVR2	activin A receptor, type IIA	protein-coding
chr3	52016400	52017247	137	NA	promoter-TSS (NM_001198895)	promoter-TSS (NM_001198895)	-477	NM_001198897	95	Hs.334707	XM_005265604	ENSG00000114786	ACY1	ACY-1|ACY1D|HEL-S-5	aminoacylase 1	protein-coding
chr3	52016400	52017247	58	NA	promoter-TSS (NM_001198895)	promoter-TSS (NM_001198895)	-477	NM_001198897	95	Hs.334707	XM_005265604	ENSG00000114786	ACY1	ACY-1|ACY1D|HEL-S-5	aminoacylase 1	protein-coding
chr11	67417746	67418654	2124	NA	promoter-TSS (NM_080658)	promoter-TSS (NM_080658)	-70	NM_080658	91703	Hs.126265	NM_080658	ENSG00000132744	ACY3	ACY-3|HCBP1	aspartoacylase (aminocyclase) 3	protein-coding
chr8	39436300	39436954	831	NA	intron (NR_046245, intron 4 of 4)	MER11A|LTR|ERVK	-5460	NM_001190956	8749	Hs.127930	XM_005273667	ENSG00000168619	ADAM18	ADAM27|tMDCIII	ADAM metallopeptidase domain 18	protein-coding
chr8	24109056	24109595	556	NA	Intergenic	LTR22A|LTR|ERVK	-42255	NM_021777	10863	Hs.174030	XM_005273378	ENSG00000042980	ADAM28	ADAM 28|ADAM23|MDC-L|MDC-Lm|MDC-Ls|MDCL|eMDC II|eMDCII	ADAM metallopeptidase domain 28	protein-coding
chr8	24076019	24076455	35	NA	Intergenic	Intergenic	-75343	NM_021777	10863	Hs.174030	XM_005273378	ENSG00000042980	ADAM28	ADAM 28|ADAM23|MDC-L|MDC-Lm|MDC-Ls|MDCL|eMDC II|eMDCII	ADAM metallopeptidase domain 28	protein-coding
chr8	24196868	24197197	173	NA	exon (NM_014265, exon 15 of 23)	exon (NM_014265, exon 15 of 23)	-44766	NM_001145272	27299	Hs.521459	NM_001145271	ENSG00000134028	ADAMDEC1	M12.219	ADAM-like, decysin 1	protein-coding
chr15	100752337	100752686	174	NA	intron (NM_139057, intron 7 of 21)	intron (NM_139057, intron 7 of 21)	129672	NM_139057	170691	Hs.513200	XM_005254872	ENSG00000140470	ADAMTS17	-	ADAM metallopeptidase with thrombospondin type 1 motif, 17	protein-coding
chr7	966040	966517	618	NA	exon (NM_006869, exon 3 of 11)	exon (NM_006869, exon 3 of 11)	574	NM_001284310	11033	Hs.602573	XM_005249586	ENSG00000105963	ADAP1	CENTA1|GCS1L|p42IP4	ArfGAP with dual PH domains 1	protein-coding
chr7	985290	985814	589	NA	promoter-TSS (NM_001284309)	promoter-TSS (NM_001284309)	-100	NM_001284309	11033	Hs.602573	XM_005249586	ENSG00000105963	ADAP1	CENTA1|GCS1L|p42IP4	ArfGAP with dual PH domains 1	protein-coding
chr10	1474485	1474858	45	NA	intron (NM_018702, intron 1 of 9)	intron (NM_018702, intron 1 of 9)	-94154	NR_033387	642394	Hs.568831	NR_033387	ENSG00000205696	ADARB2-AS1	C10orf109|NCRNA00168|bA466B20.1	ADARB2 antisense RNA 1	ncRNA
chr1	227282003	227282837	1628	NA	intron (NM_003607, intron 15 of 35)	ERVL-E-int|LTR|ERVL	154482	NM_020247	56997	Hs.118241	XM_005273201	ENSG00000163050	ADCK3	ARCA2|CABC1|COQ10D4|COQ8|SCAR9	aarF domain containing kinase 3	protein-coding
chr8	132312013	132312477	234	NA	Intergenic	MSTA-int|LTR|ERVL-MaLR	-259410	NM_001115	114	Hs.591859	XM_005250769	ENSG00000155897	ADCY8	AC8|ADCY3|HBAC1	adenylate cyclase 8 (brain)	protein-coding
chr16	4226807	4227176	80	NA	Intergenic	Intergenic	-60805	NM_001116	115	Hs.610484	XM_005255079	ENSG00000162104	ADCY9	AC9	adenylate cyclase 9	protein-coding
chr10	111737219	111737681	603	NA	intron (NR_038943, intron 2 of 4)	intron (NR_038943, intron 2 of 4)	-28276	NM_019903	120	Hs.501012	XM_005269529	ENSG00000148700	ADD3	ADDL	adducin 3 (gamma)	protein-coding
chr20	4225383	4225972	385	NA	intron (NM_000678, intron 1 of 1)	intron (NM_000678, intron 1 of 1)	3982	NM_000678	146	Hs.557	NM_000678	ENSG00000171873	ADRA1D	ADRA1|ADRA1A|ADRA1R|ALPHA1|DAR|dJ779E11.2	adrenoceptor alpha 1D	protein-coding
chr2	96756806	96757312	311	NA	Intergenic	Intergenic	24829	NM_000682	151	Hs.247686	XM_005263890	ENSG00000222040	ADRA2B	ADRA2L1|ADRA2RL1|ADRARL1|ALPHA2BAR|alpha-2BAR	adrenoceptor alpha 2B	protein-coding
chr4	3788114	3788388	102	NA	Intergenic	Intergenic	19955	NM_000683	152	Hs.123022	NM_000683	ENSG00000184160	ADRA2C	ADRA2L2|ADRA2RL2|ADRARL2|ALPHA2CAR	adrenoceptor alpha 2C	protein-coding
chr4	3821043	3821277	91	NA	Intergenic	MLT1A-int|LTR|ERVL-MaLR	52864	NM_000683	152	Hs.123022	NM_000683	ENSG00000184160	ADRA2C	ADRA2L2|ADRA2RL2|ADRARL2|ALPHA2CAR	adrenoceptor alpha 2C	protein-coding
chr10	115718273	115718713	263	NA	Intergenic	LTR16A1|LTR|ERVL	-85313	NM_000684	153	Hs.99913	NM_000684	ENSG00000043591	ADRB1	ADRB1R|B1AR|BETA1AR|RHR	adrenoceptor beta 1	protein-coding
chr10	115720322	115720919	76	NA	Intergenic	Intergenic	-83186	NM_000684	153	Hs.99913	NM_000684	ENSG00000043591	ADRB1	ADRB1R|B1AR|BETA1AR|RHR	adrenoceptor beta 1	protein-coding
chr10	115720322	115720919	74	NA	Intergenic	Intergenic	-83186	NM_000684	153	Hs.99913	NM_000684	ENSG00000043591	ADRB1	ADRB1R|B1AR|BETA1AR|RHR	adrenoceptor beta 1	protein-coding
chr8	37818357	37818720	515	NA	Intergenic	MIRc|SINE|MIR	5646	NM_000025	155	Hs.2549	NM_000025	ENSG00000188778	ADRB3	BETA3AR	adrenoceptor beta 3	protein-coding
chr11	67034971	67035325	129	NA	intron (NM_001619, intron 1 of 20)	intron (NM_001619, intron 1 of 20)	1243	NM_001619	156	Hs.83636	NM_001619	ENSG00000173020	ADRBK1	BARK1|BETA-ARK1|GRK2	adrenergic, beta, receptor kinase 1	protein-coding
chr22	25906786	25907305	244	NA	Intergenic	MER5A|DNA|hAT-Charlie	-53816	NM_005160	157	Hs.657494	NM_005160	ENSG00000100077	ADRBK2	BARK2|GRK3	adrenergic, beta, receptor kinase 2	protein-coding
chr4	7980241	7980568	170	NA	intron (NM_001130084, intron 19 of 19)	intron (NM_001130084, intron 19 of 19)	-38751	NM_001134647	60312	Hs.529369	XM_005247991	ENSG00000196526	AFAP1	AFAP|AFAP-110|AFAP110	actin filament associated protein 1	protein-coding
chr4	7974437	7974699	49	NA	intron (NM_001130084, intron 19 of 19)	intron (NM_001130084, intron 19 of 19)	-32915	NM_001134647	60312	Hs.529369	XM_005247991	ENSG00000196526	AFAP1	AFAP|AFAP-110|AFAP110	actin filament associated protein 1	protein-coding
chr5	148589963	148590160	51	NA	intron (NM_014945, intron 6 of 23)	intron (NM_014945, intron 6 of 23)	-61340	NM_001146337	134265	Hs.483793	XM_005268373	ENSG00000157510	AFAP1L1	-	actin filament associated protein 1-like 1	protein-coding
chr4	87898837	87899334	1154	NA	intron (NM_001166693, intron 2 of 20)	L2c|LINE|L2	-29068	NM_005935	4299	Hs.480190	XM_005263007	ENSG00000172493	AFF1	AF4|MLLT2|PBM1	AF4/FMR2 family, member 1	protein-coding
chr4	87857310	87857968	653	NA	intron (NM_001166693, intron 1 of 20)	intron (NM_001166693, intron 1 of 20)	1485	NM_001166693	4299	Hs.480190	XM_005263007	ENSG00000172493	AFF1	AF4|MLLT2|PBM1	AF4/FMR2 family, member 1	protein-coding
chr18	12359514	12359832	138	NA	intron (NM_006796, intron 7 of 16)	AluSx1|SINE|Alu	17602	NM_006796	10939	Hs.726355	NM_006796	ENSG00000141385	AFG3L2	SCA28|SPAX5	AFG3-like AAA ATPase 2	protein-coding
chr17	76184033	76184257	133	NA	promoter-TSS (NM_003258)	promoter-TSS (NM_003258)	747	NR_027083	125061	Hs.558614	NM_001010982	ENSG00000183077	AFMID	FKF|KF|KFA	arylformamidase	protein-coding
chr2	236617833	236618313	491	NA	intron (NM_001037131, intron 2 of 17)	intron (NM_001037131, intron 2 of 17)	215340	NM_001244888	116987	Hs.435039	XM_005246058	ENSG00000157985	AGAP1	AGAP-1|CENTG2|GGAP1|cnt-g2	ArfGAP with GTPase domain, ankyrin repeat and PH domain 1	protein-coding
chr2	236172327	236172902	354	NA	Intergenic	Intergenic	-230119	NM_001037131	116987	Hs.435039	XM_005246058	ENSG00000157985	AGAP1	AGAP-1|CENTG2|GGAP1|cnt-g2	ArfGAP with GTPase domain, ankyrin repeat and PH domain 1	protein-coding
chr7	134676716	134677112	126	NA	intron (NM_178563, intron 3 of 16)	L1MEc|LINE|L1	5655	NM_178563	340351	Hs.648616	NM_178563	ENSG00000146856	AGBL3	-	ATP/GTP binding protein-like 3	protein-coding
chr7	100137574	100138097	768	NA	intron (NM_006076, intron 1 of 11)	intron (NM_006076, intron 1 of 11)	1001	NM_006076	3268	Hs.521083	XM_005250306	ENSG00000106351	AGFG2	HRBL|RABR	ArfGAP with FG repeats 2	protein-coding
chr1	15911416	15911720	91	NA	promoter-TSS (NM_024758)	promoter-TSS (NM_024758)	37	NM_024758	79814	Hs.461532	NM_024758		AGMAT	-	agmatine ureohydrolase (agmatinase)	protein-coding
chr7	15344779	15345162	149	NA	intron (NM_001004320, intron 12 of 12)	intron (NM_001004320, intron 12 of 12)	256670	NM_001004320	392636	Hs.670634	NM_001004320	ENSG00000187546	AGMO	TMEM195	alkylglycerol monooxygenase	protein-coding
chr6	32145523	32145896	40	NA	promoter-TSS (NM_006913).4	promoter-TSS (NM_006913).4	179	NM_032741	10554	Hs.409230	XM_005248805	ENSG00000204310	AGPAT1	1-AGPAT1|G15|LPAAT-alpha|LPAATA	1-acylglycerol-3-phosphate O-acyltransferase 1	protein-coding
chr9	139587769	139588588	722	NA	Intergenic	MER91C|DNA|hAT-Tip100	-6267	NM_006412	10555	Hs.320151	NM_001012727	ENSG00000169692	AGPAT2	1-AGPAT2|BSCL|BSCL1|LPAAB|LPAAT-beta	1-acylglycerol-3-phosphate O-acyltransferase 2	protein-coding
chr7	16826655	16827117	283	NA	Intergenic	Intergenic	17852	NM_006408	10551	Hs.530009	XM_005249581	ENSG00000106541	AGR2	AG2|GOB-4|HAG-2|HEL-S-116|PDIA17|XAG-2	anterior gradient 2	protein-coding
chr7	16861689	16861902	32	NA	Intergenic	Intergenic	-17057	NM_006408	10551	Hs.530009	XM_005249581	ENSG00000106541	AGR2	AG2|GOB-4|HAG-2|HEL-S-116|PDIA17|XAG-2	anterior gradient 2	protein-coding
chr7	16931848	16932488	538	NA	Intergenic	Intergenic	-10555	NM_176813	155465	Hs.100686	XM_005249627	ENSG00000173467	AGR3	AG3|BCMP11|HAG3|PDIA18|hAG-3	anterior gradient 3	protein-coding
chr7	16954400	16954892	479	NA	Intergenic	Intergenic	-33033	NM_176813	155465	Hs.100686	XM_005249627	ENSG00000173467	AGR3	AG3|BCMP11|HAG3|PDIA18|hAG-3	anterior gradient 3	protein-coding
chr7	16967784	16968016	73	NA	Intergenic	L2b|LINE|L2	-46287	NM_176813	155465	Hs.100686	XM_005249627	ENSG00000173467	AGR3	AG3|BCMP11|HAG3|PDIA18|hAG-3	anterior gradient 3	protein-coding
chr7	17060902	17061148	72	NA	Intergenic	Intergenic	-139412	NM_176813	155465	Hs.100686	XM_005249627	ENSG00000173467	AGR3	AG3|BCMP11|HAG3|PDIA18|hAG-3	anterior gradient 3	protein-coding
chr1	230844426	230844934	181	NA	intron (NM_000029, intron 2 of 4)	intron (NM_000029, intron 2 of 4)	5656	NM_000029	183	Hs.19383	NM_000029	ENSG00000135744	AGT	ANHU|SERPINA8	angiotensinogen (serpin peptidase inhibitor, clade A, member 8)	protein-coding
chr9	88047577	88048056	272	NA	Intergenic	Intergenic	309128	NM_001286715	23287	Hs.719980	XM_005251845	ENSG00000135049	AGTPBP1	CCP1|NNA1	ATP/GTP binding protein 1	protein-coding
chr9	87873963	87874279	21	NA	Intergenic	Intergenic	482823	NM_001286715	23287	Hs.719980	XM_005251845	ENSG00000135049	AGTPBP1	CCP1|NNA1	ATP/GTP binding protein 1	protein-coding
chr3	148318763	148319051	133	NA	Intergenic	ERVL-E-int|LTR|ERVL	-96751	NM_009585	185	Hs.744837	NM_000685	ENSG00000144891	AGTR1	AG2S|AGTR1A|AGTR1B|AT1|AT1AR|AT1B|AT1BR|AT1R|AT2R1|AT2R1A|AT2R1B|HAT1R	angiotensin II receptor, type 1	protein-coding
chr3	147929546	147929853	110	NA	Intergenic	Intergenic	-485959	NM_009585	185	Hs.744837	NM_000685	ENSG00000144891	AGTR1	AG2S|AGTR1A|AGTR1B|AT1|AT1AR|AT1B|AT1BR|AT1R|AT2R1|AT2R1A|AT2R1B|HAT1R	angiotensin II receptor, type 1	protein-coding
chr20	32898943	32899785	345	NA	5' UTR (NM_001161766, exon 1 of 10)	5' UTR (NM_001161766, exon 1 of 10)	244	NM_001161766	191	Hs.388004	XM_005260315	ENSG00000101444	AHCY	SAHH|adoHcyase	adenosylhomocysteinase	protein-coding
chr1	110521547	110521764	80	NA	Intergenic	Intergenic	-5732	NM_006621	10768	Hs.743973	XM_005270388	ENSG00000168710	AHCYL1	DCAL|IRBIT|PRO0233|XPVKONA	adenosylhomocysteinase-like 1	protein-coding
chr1	27890138	27890849	645	NA	intron (NM_001029882, intron 1 of 6)	intron (NM_001029882, intron 1 of 6)	39650	NM_001029882	27245	Hs.469280	XM_005245848	ENSG00000126705	AHDC1	CL23945|DJ159A19.3|RP1-159A19.1	AT hook, DNA binding motif, containing 1	protein-coding
chr1	27875862	27876274	384	NA	exon (NM_001029882, exon 6 of 7)	exon (NM_001029882, exon 6 of 7)	54075	NM_001029882	27245	Hs.469280	XM_005245848	ENSG00000126705	AHDC1	CL23945|DJ159A19.3|RP1-159A19.1	AT hook, DNA binding motif, containing 1	protein-coding
chr11	62316278	62316570	117	NA	Intergenic	Intergenic	-2092	NM_001620	79026	Hs.502756	XM_005274240	ENSG00000124942	AHNAK	AHNAKRS	AHNAK nucleoprotein	protein-coding
chr7	17139036	17139681	1244	NA	Intergenic	X3_LINE|LINE|RTE-BovB	-198918	NM_001621	196	Hs.171189	NM_001621	ENSG00000106546	AHR	bHLHe76	aryl hydrocarbon receptor	protein-coding
chr7	17245963	17246429	190	NA	Intergenic	MIRb|SINE|MIR	-92080	NM_001621	196	Hs.171189	NM_001621	ENSG00000106546	AHR	bHLHe76	aryl hydrocarbon receptor	protein-coding
chr7	17279266	17279629	95	NA	Intergenic	Intergenic	-58829	NM_001621	196	Hs.171189	NM_001621	ENSG00000106546	AHR	bHLHe76	aryl hydrocarbon receptor	protein-coding
chr7	17182883	17183141	93	NA	Intergenic	LTR88b|LTR|Gypsy?	-155264	NM_001621	196	Hs.171189	NM_001621	ENSG00000106546	AHR	bHLHe76	aryl hydrocarbon receptor	protein-coding
chr1	26685507	26686063	403	NA	Intergenic	Intergenic	-5164	NM_001039775	55057	Hs.128738	XM_005245918		AIM1L	CRYBG2	absent in melanoma 1-like	protein-coding
chr1	26677286	26677605	173	NA	intron (NM_001039775, intron 1 of 19)	intron (NM_001039775, intron 1 of 19)	3176	NM_001039775	55057	Hs.128738	XM_005245918		AIM1L	CRYBG2	absent in melanoma 1-like	protein-coding
chr1	26680531	26680969	154	NA	promoter-TSS (NM_001039775)	promoter-TSS (NM_001039775)	-129	NM_001039775	55057	Hs.128738	XM_005245918		AIM1L	CRYBG2	absent in melanoma 1-like	protein-coding
chr4	107033420	107033633	50	NA	intron (NM_001163435, intron 24 of 25)	HERVK22-int|LTR|ERVK	-203241	NM_001142415	9255	Hs.591680	NM_001142415	ENSG00000164022	AIMP1	EMAP2|EMAPII|HLD3|SCYE1|p43	aminoacyl tRNA synthetase complex-interacting multifunctional protein 1	protein-coding
chr14	23445754	23446268	411	NA	5' UTR (NM_198086, exon 1 of 6)	5' UTR (NM_198086, exon 1 of 6)	421	NM_198086	84962	Hs.655832	XM_005268130	ENSG00000129474	AJUBA	JUB	ajuba LIM protein	protein-coding
chr1	33488256	33488807	715	NA	intron (NM_001625, intron 2 of 5)	intron (NM_001625, intron 2 of 5)	13981	NM_001199199	204	Hs.470907	XM_005270603	ENSG00000004455	AK2	ADK2|AK 2	adenylate kinase 2	protein-coding
chr1	33487509	33487761	220	NA	intron (NM_001625, intron 2 of 5)	intron (NM_001625, intron 2 of 5)	14877	NM_001199199	204	Hs.470907	XM_005270603	ENSG00000004455	AK2	ADK2|AK 2	adenylate kinase 2	protein-coding
chr9	4740372	4740841	102	NA	intron (NM_001199853, intron 1 of 4)	intron (NM_001199853, intron 1 of 4)	703	NM_001199852	50808	Hs.732022	NM_001199852		AK3	AK3L1|AK6|AKL3L|AKL3L1|FIX	adenylate kinase 3	protein-coding
chr1	77915082	77915439	25	NA	intron (NM_012093, intron 8 of 13)	THE1B-int|LTR|ERVL-MaLR	166973	NM_012093	26289	Hs.597002	XM_005270739	ENSG00000154027	AK5	AK6	adenylate kinase 5	protein-coding
chr17	55162984	55163953	497	NA	intron (NM_001242903, intron 1 of 11)	CpG	333	NM_001242902	8165	Hs.463506	XM_005257707	ENSG00000121057	AKAP1	AKAP|AKAP121|AKAP149|AKAP84|D-AKAP1|PPP1R43|PRKA1|SAKAP84|TDRD17	A kinase (PRKA) anchor protein 1	protein-coding
chr17	55162984	55163953	68	NA	intron (NM_001242903, intron 1 of 11)	CpG	333	NM_001242902	8165	Hs.463506	XM_005257707	ENSG00000121057	AKAP1	AKAP|AKAP121|AKAP149|AKAP84|D-AKAP1|PPP1R43|PRKA1|SAKAP84|TDRD17	A kinase (PRKA) anchor protein 1	protein-coding
chr15	86106517	86106880	285	NA	intron (NM_007200, intron 5 of 36)	intron (NM_007200, intron 5 of 36)	-56483	NM_001270546	11214	Hs.710656	XM_005254839	ENSG00000170776	AKAP13	AKAP-13|AKAP-Lbc|ARHGEF13|BRX|HA-3|Ht31|LBC|PRKA13|PROTO-LB|PROTO-LBC|c-lbc|p47	A kinase (PRKA) anchor protein 13	protein-coding
chr15	86122381	86122632	55	NA	exon (NM_006738, exon 7 of 37)	exon (NM_006738, exon 7 of 37)	-40675	NM_001270546	11214	Hs.710656	XM_005254839	ENSG00000170776	AKAP13	AKAP-13|AKAP-Lbc|ARHGEF13|BRX|HA-3|Ht31|LBC|PRKA13|PROTO-LB|PROTO-LBC|c-lbc|p47	A kinase (PRKA) anchor protein 13	protein-coding
chr9	112887401	112887956	482	NA	promoter-TSS (NM_001136562)	promoter-TSS (NM_001136562)	-103	NM_001136562	11217	Hs.591908	NM_001004065	ENSG00000241978	AKAP2	AKAP-2|AKAPKL|PRKA2	A kinase (PRKA) anchor protein 2	protein-coding
chrX	49919111	49919526	201	NA	Intergenic	LTR8A|LTR|ERV1	45686	NM_139289	8852	Hs.97633	NM_003886	ENSG00000147081	AKAP4	AKAP 82|AKAP-4|AKAP82|CT99|FSC1|HI|PRKA4|hAKAP82|p82	A kinase (PRKA) anchor protein 4	protein-coding
chr14	32853737	32854239	473	NA	intron (NM_004274, intron 1 of 13)	intron (NM_004274, intron 1 of 13)	55509	NM_004274	9472	Hs.509083	XM_005268219	ENSG00000151320	AKAP6	ADAP100|ADAP6|AKAP100|PRKA6|mAKAP	A kinase (PRKA) anchor protein 6	protein-coding
chr14	32983214	32983788	179	NA	intron (NM_004274, intron 2 of 13)	intron (NM_004274, intron 2 of 13)	185022	NM_004274	9472	Hs.509083	XM_005268219	ENSG00000151320	AKAP6	ADAP100|ADAP6|AKAP100|PRKA6|mAKAP	A kinase (PRKA) anchor protein 6	protein-coding
chr14	32690121	32690389	76	NA	Intergenic	Intergenic	-108224	NM_004274	9472	Hs.509083	XM_005268219	ENSG00000151320	AKAP6	ADAP100|ADAP6|AKAP100|PRKA6|mAKAP	A kinase (PRKA) anchor protein 6	protein-coding
chr14	32942670	32942924	67	NA	intron (NM_004274, intron 2 of 13)	intron (NM_004274, intron 2 of 13)	144318	NM_004274	9472	Hs.509083	XM_005268219	ENSG00000151320	AKAP6	ADAP100|ADAP6|AKAP100|PRKA6|mAKAP	A kinase (PRKA) anchor protein 6	protein-coding
chr7	91639454	91639878	618	NA	intron (NM_147185, intron 8 of 49)	LTR22C|LTR|ERVK	69477	NM_005751	10142	Hs.651221	XM_005250102	ENSG00000127914	AKAP9	AKAP-9|AKAP350|AKAP450|CG-NAP|HYPERION|LQT11|MU-RMS-40.16A|PPP1R45|PRKA9|YOTIAO	A kinase (PRKA) anchor protein 9	protein-coding
chr1	46008193	46008733	490	NA	Intergenic	Intergenic	-7992	NM_006066	10327	Hs.721160	XR_246223	ENSG00000117448	AKR1A1	ALDR1|ALR|ARM|DD3|HEL-S-6	aldo-keto reductase family 1, member A1 (aldehyde reductase)	protein-coding
chr7	134116602	134117013	276	NA	Intergenic	MIRb|SINE|MIR	27081	NM_001628	231	Hs.521212	XM_005250234	ENSG00000085662	AKR1B1	ADR|ALDR1|ALR2|AR	aldo-keto reductase family 1, member B1 (aldose reductase)	protein-coding
chr7	134107416	134107828	127	NA	Intergenic	Intergenic	36266	NM_001628	231	Hs.521212	XM_005250234	ENSG00000085662	AKR1B1	ADR|ALDR1|ALR2|AR	aldo-keto reductase family 1, member B1 (aldose reductase)	protein-coding
chr10	4989868	4990199	161	NA	Intergenic	MER67A|LTR|ERV1	-15421	NM_001353	1645	Hs.460260	NM_001353		AKR1C1	2-ALPHA-HSD|20-ALPHA-HSD|C9|DD1|DD1/DD2|DDH|DDH1|H-37|HAKRC|HBAB|MBAB	aldo-keto reductase family 1, member C1	protein-coding
chr10	5113604	5114247	220	NA	intron (NM_001253908, intron 1 of 8)	MER67A|LTR|ERV1	-22643	NM_001253909	8644	Hs.78183	XM_005252637	ENSG00000196139	AKR1C3	DD3|DDX|HA1753|HAKRB|HAKRe|HSD17B5|PGFS|hluPGFS	aldo-keto reductase family 1, member C3	protein-coding
chr10	5179956	5180411	219	NA	Intergenic	MER11A|LTR|ERVK	43615	NM_003739	8644	Hs.78183	XM_005252637	ENSG00000196139	AKR1C3	DD3|DDX|HA1753|HAKRB|HAKRe|HSD17B5|PGFS|hluPGFS	aldo-keto reductase family 1, member C3	protein-coding
chr10	5237740	5238504	446	NA	promoter-TSS (NM_001818)	promoter-TSS (NM_001818)	-676	NM_001818	1109	Hs.567245	NM_001818	ENSG00000198610	AKR1C4	3-alpha-HSD|C11|CDR|CHDR|DD-4|DD4|HAKRA	aldo-keto reductase family 1, member C4	protein-coding
chr10	5189345	5189790	576	NA	Intergenic	MST-int|LTR|ERVL-MaLR	37583	NR_027916	340811	Hs.282513	NM_001007536		AKR1CL1	-	aldo-keto reductase family 1, member C-like 1	pseudo
chr10	5190340	5190894	383	NA	Intergenic	MER4C|LTR|ERV1	36533	NR_027916	340811	Hs.282513	NM_001007536		AKR1CL1	-	aldo-keto reductase family 1, member C-like 1	pseudo
chr1	113447598	113448038	199	NA	Intergenic	Intergenic	-18154	NR_002796	246182	Hs.647691	NR_002796		AKR7A2P1	AFARP1	aldo-keto reductase family 7, member A2 pseudogene 1	pseudo
chr3	52230995	52231465	647	NA	promoter-TSS (NM_199166)	promoter-TSS (NM_199166)	-869	NM_000688	211	Hs.476308	XM_005264944	ENSG00000023330	ALAS1	ALAS|ALAS3|ALASH|MIG4	aminolevulinate, delta-, synthase 1	protein-coding
chr3	105283463	105283727	89	NA	intron (NM_001627, intron 14 of 15)	FRAM|SINE|Alu	198038	NM_001243280	214	Hs.740441	NM_001243280	ENSG00000170017	ALCAM	CD166|MEMD	activated leukocyte cell adhesion molecule	protein-coding
chr10	97395094	97395523	201	NA	intron (NM_001017423, intron 5 of 17)	intron (NM_001017423, intron 5 of 17)	21259	NM_001017423	5832	Hs.500645	XM_005270011	ENSG00000059573	ALDH18A1	ARCL3A|GSAS|P5CS|PYCS	aldehyde dehydrogenase 18 family, member A1	protein-coding
chr9	75549117	75549756	1615	NA	intron (NM_000689, intron 2 of 12)	intron (NM_000689, intron 2 of 12)	18797	NM_000689	216	Hs.76392	XM_005251800	ENSG00000165092	ALDH1A1	ALDC|ALDH-E1|ALDH1|ALDH11|HEL-S-53e|HEL12|PUMB1|RALDH1	aldehyde dehydrogenase 1 family, member A1	protein-coding
chr9	75437351	75437920	276	NA	intron (NM_138691, intron 20 of 23)	intron (NM_138691, intron 20 of 23)	130598	NM_000689	216	Hs.76392	XM_005251800	ENSG00000165092	ALDH1A1	ALDC|ALDH-E1|ALDH1|ALDH11|HEL-S-53e|HEL12|PUMB1|RALDH1	aldehyde dehydrogenase 1 family, member A1	protein-coding
chr9	75473185	75473524	131	NA	Intergenic	L2c|LINE|L2	94879	NM_000689	216	Hs.76392	XM_005251800	ENSG00000165092	ALDH1A1	ALDC|ALDH-E1|ALDH1|ALDH11|HEL-S-53e|HEL12|PUMB1|RALDH1	aldehyde dehydrogenase 1 family, member A1	protein-coding
chr9	75594359	75594770	110	NA	Intergenic	Intergenic	-26331	NM_000689	216	Hs.76392	XM_005251800	ENSG00000165092	ALDH1A1	ALDC|ALDH-E1|ALDH1|ALDH11|HEL-S-53e|HEL12|PUMB1|RALDH1	aldehyde dehydrogenase 1 family, member A1	protein-coding
chr12	112211666	112212295	219	NA	intron (NM_001204889, intron 1 of 11)	intron (NM_001204889, intron 1 of 11)	7289	NM_000690	217	Hs.604551	NM_000690	ENSG00000111275	ALDH2	ALDH-E2|ALDHI|ALDM	aldehyde dehydrogenase 2 family (mitochondrial)	protein-coding
chr12	112211666	112212295	216	NA	intron (NM_001204889, intron 1 of 11)	intron (NM_001204889, intron 1 of 11)	7289	NM_000690	217	Hs.604551	NM_000690	ENSG00000111275	ALDH2	ALDH-E2|ALDHI|ALDM	aldehyde dehydrogenase 2 family (mitochondrial)	protein-coding
chr12	112215477	112215716	53	NA	intron (NM_001204889, intron 1 of 11)	intron (NM_001204889, intron 1 of 11)	10905	NM_000690	217	Hs.604551	NM_000690	ENSG00000111275	ALDH2	ALDH-E2|ALDHI|ALDM	aldehyde dehydrogenase 2 family (mitochondrial)	protein-coding
chr17	19651515	19652103	238	NA	promoter-TSS (NM_000691)	promoter-TSS (NM_000691)	-63	NM_000691	218	Hs.531682	XM_005256522	ENSG00000108602	ALDH3A1	ALDH3|ALDHIII	aldehyde dehydrogenase 3 family, member A1	protein-coding
chr17	19656248	19656605	133	NA	Intergenic	Intergenic	-4680	NM_000691	218	Hs.531682	XM_005256522	ENSG00000108602	ALDH3A1	ALDH3|ALDHIII	aldehyde dehydrogenase 3 family, member A1	protein-coding
chr17	19637385	19637641	103	NA	Intergenic	L2a|LINE|L2	11259	NM_001135168	218	Hs.531682	XM_005256522	ENSG00000108602	ALDH3A1	ALDH3|ALDHIII	aldehyde dehydrogenase 3 family, member A1	protein-coding
chr17	19575337	19576007	610	NA	intron (NM_000382, intron 9 of 9)	intron (NM_000382, intron 9 of 9)	23608	NM_001031806	224	Hs.499886	NM_000382	ENSG00000072210	ALDH3A2	ALDH10|FALDH|SLS	aldehyde dehydrogenase 3 family, member A2	protein-coding
chr11	67777691	67778582	246	NA	intron (NM_001030010, intron 1 of 8)	intron (NM_001030010, intron 1 of 8)	346	NM_001030010	221	Hs.523841	NM_000694	ENSG00000006534	ALDH3B1	ALDH4|ALDH7	aldehyde dehydrogenase 3 family, member B1	protein-coding
chr11	67780752	67781250	231	NA	intron (NM_001030010, intron 1 of 8)	intron (NM_001030010, intron 1 of 8)	3211	NM_001030010	221	Hs.523841	NM_000694	ENSG00000006534	ALDH3B1	ALDH4|ALDH7	aldehyde dehydrogenase 3 family, member B1	protein-coding
chr11	67781901	67782444	101	NA	intron (NM_001030010, intron 1 of 8)	MIR|SINE|MIR	4382	NM_001030010	221	Hs.523841	NM_000694	ENSG00000006534	ALDH3B1	ALDH4|ALDH7	aldehyde dehydrogenase 3 family, member B1	protein-coding
chr11	67777691	67778582	27	NA	intron (NM_001030010, intron 1 of 8)	intron (NM_001030010, intron 1 of 8)	346	NM_001030010	221	Hs.523841	NM_000694	ENSG00000006534	ALDH3B1	ALDH4|ALDH7	aldehyde dehydrogenase 3 family, member B1	protein-coding
chr11	67495445	67496101	755	NA	Intergenic	HERVE-int|LTR|ERV1	-47088	NM_001031615	222	Hs.87539	NM_000695	ENSG00000132746	ALDH3B2	ALDH8	aldehyde dehydrogenase 3 family, member B2	protein-coding
chr11	67466463	67466973	609	NA	Intergenic	MER11A|LTR|ERVK	-18033	NM_001031615	222	Hs.87539	NM_000695	ENSG00000132746	ALDH3B2	ALDH8	aldehyde dehydrogenase 3 family, member B2	protein-coding
chr6	135174127	135175272	760	NA	Intergenic	Intergenic	96561	NM_170771	64577	Hs.486520	NM_001193480	ENSG00000118514	ALDH8A1	ALDH12|DJ352A20.2	aldehyde dehydrogenase 8 family, member A1	protein-coding
chr6	135028653	135029113	60	NA	Intergenic	L4|LINE|RTE	242377	NM_170771	64577	Hs.486520	NM_001193480	ENSG00000118514	ALDH8A1	ALDH12|DJ352A20.2	aldehyde dehydrogenase 8 family, member A1	protein-coding
chr2	30009128	30009758	1038	NA	intron (NM_004304, intron 1 of 28)	L2c|LINE|L2	135034	NM_004304	238	Hs.654469	NM_004304	ENSG00000171094	ALK	CD246|NBLST3	anaplastic lymphoma receptor tyrosine kinase	protein-coding
chr2	29840651	29841379	543	NA	intron (NM_004304, intron 3 of 28)	intron (NM_004304, intron 3 of 28)	303462	NM_004304	238	Hs.654469	NM_004304	ENSG00000171094	ALK	CD246|NBLST3	anaplastic lymphoma receptor tyrosine kinase	protein-coding
chr2	29971964	29972244	99	NA	intron (NM_004304, intron 1 of 28)	MER5A|DNA|hAT-Charlie	172373	NM_004304	238	Hs.654469	NM_004304	ENSG00000171094	ALK	CD246|NBLST3	anaplastic lymphoma receptor tyrosine kinase	protein-coding
chr2	30188853	30189134	50	NA	Intergenic	Intergenic	-44516	NM_004304	238	Hs.654469	NM_004304	ENSG00000171094	ALK	CD246|NBLST3	anaplastic lymphoma receptor tyrosine kinase	protein-coding
chr14	78148078	78148677	156	NA	intron (NM_006020, intron 3 of 5)	MER68|LTR|ERVL	25979	NM_006020	8846	Hs.94542	XM_005268165	ENSG00000100601	ALKBH1	ABH|ABH1|ALKBH|alkB|hABH	alkB, alkylation repair homolog 1 (E. coli)	protein-coding
chr14	78165913	78166236	31	NA	intron (NM_006020, intron 2 of 5)	MamSINE1|SINE|tRNA	8282	NM_006020	8846	Hs.94542	XM_005268165	ENSG00000100601	ALKBH1	ABH|ABH1|ALKBH|alkB|hABH	alkB, alkylation repair homolog 1 (E. coli)	protein-coding
chr11	43942278	43942670	480	NA	promoter-TSS (NR_038907)	promoter-TSS (NR_038907)	20	NR_038907	100507300	Hs.664588	NR_038907	ENSG00000244926	ALKBH3-AS1	RP11-613D13.7	ALKBH3 antisense RNA 1	ncRNA
chr19	6372217	6372450	50	NA	promoter-TSS (NM_032306)	promoter-TSS (NM_032306)	-111	NM_032306	84266	Hs.111099	XM_005259658	ENSG00000125652	ALKBH7	ABH7|SPATA11|UNQ6002	alkB, alkylation repair homolog 7 (E. coli)	protein-coding
chr17	7982438	7983354	855	NA	intron (NM_001139, intron 7 of 14)	CpG-10128	8125	NM_001139	242	Hs.136574	NM_001139	ENSG00000179477	ALOX12B	12R-LOX|ARCI2	arachidonate 12-lipoxygenase, 12R type	protein-coding
chr17	7982438	7983354	60	NA	intron (NM_001139, intron 7 of 14)	CpG-10128	8125	NM_001139	242	Hs.136574	NM_001139	ENSG00000179477	ALOX12B	12R-LOX|ARCI2	arachidonate 12-lipoxygenase, 12R type	protein-coding
chr13	31313659	31314441	159	NA	intron (NM_001204406, intron 2 of 5)	L3b|LINE|CR1	4405	NM_001629	241	Hs.507658	NM_001204406	ENSG00000132965	ALOX5AP	FLAP	arachidonate 5-lipoxygenase-activating protein	protein-coding
chr13	31313659	31314441	42	NA	intron (NM_001204406, intron 2 of 5)	L3b|LINE|CR1	4405	NM_001629	241	Hs.507658	NM_001204406	ENSG00000132965	ALOX5AP	FLAP	arachidonate 5-lipoxygenase-activating protein	protein-coding
chr2	233262960	233263561	296	NA	Intergenic	L1ME3B|LINE|L1	-8292	NM_031313	251	Hs.333509	NM_031313	ENSG00000163286	ALPPL2	ALPG|ALPPL|GCAP	alkaline phosphatase, placental-like 2	protein-coding
chr9	116843149	116843644	320	NA	Intergenic	Intergenic	-2644	NM_001633	259	Hs.436911	NM_001633	ENSG00000106927	AMBP	A1M|EDC1|HCP|HI30|IATIL|ITI|ITIL|ITILC|UTI	alpha-1-microglobulin/bikunin precursor	protein-coding
chr11	46575599	46576254	261	NA	intron (NM_001267782, intron 1 of 19)	intron (NM_001267782, intron 1 of 19)	36988	NM_017749	55626	Hs.654644	XM_005253009	ENSG00000110497	AMBRA1	DCAF3|WDR94	autophagy/beclin-1 regulator 1	protein-coding
chrX	63359695	63360198	280	NA	Intergenic	Intergenic	65678	NM_152424	139285	Hs.314225	XM_005262241	ENSG00000184675	AMER1	FAM123B|OSCS|WTX	APC membrane recruitment protein 1	protein-coding
chr2	131501954	131502452	262	NA	Intergenic	Intergenic	-10874	NM_152698	205147	Hs.369289	NM_001105193	ENSG00000178171	AMER3	FAM123C	APC membrane recruitment protein 3	protein-coding
chr16	56442519	56443047	200	NA	intron (NM_001144, intron 3 of 13)	intron (NM_001144, intron 3 of 13)	16667	NM_001144	267	Hs.295137	XM_005255889	ENSG00000159461	AMFR	GP78|RNF45	autocrine motility factor receptor, E3 ubiquitin protein ligase	protein-coding
chr11	118073168	118073793	504	NA	intron (NM_001286571, intron 5 of 8)	intron (NM_001286571, intron 5 of 8)	10594	NM_153206	120425	Hs.16291	XM_005271406	ENSG00000160593	AMICA1	AMICA|CREA7-1|CREA7-4|Gm638|JAML	adhesion molecule, interacts with CXADR antigen 1	protein-coding
chr14	103339920	103340271	188	NA	intron (NM_145725, intron 4 of 11)	intron (NM_145725, intron 4 of 11)	-48898	NM_030943	81693	Hs.534494	NM_030943	ENSG00000166126	AMN	PRO1028|amnionless	amnion associated transmembrane protein	protein-coding
chr12	31902170	31902603	391	NA	Intergenic	LTR8|LTR|ERV1	-20278	NM_001278412	196394	Hs.740628	NM_001113402	ENSG00000151743	AMN1	-	antagonist of mitotic exit network 1 homolog (S. cerevisiae)	protein-coding
chr2	112456511	112456901	102	NA	Intergenic	L1ME4a|LINE|L1	185035	NM_022662	64682	Hs.436527	XM_005263731	ENSG00000153107	ANAPC1	APC1|MCPR|TSG24	anaphase promoting complex subunit 1	protein-coding
chr10	73930885	73931201	49	NA	intron (NR_045564, intron 5 of 9)	MLT1D|LTR|ERVL-MaLR	-44715	NR_038392	119504	Hs.426296	NM_001242546	ENSG00000166295	ANAPC16	APC16|C10orf104|CENP-27|MSAG|bA570G20.3	anaphase promoting complex subunit 16	protein-coding
chr14	21155483	21156039	824	NA	intron (NM_002937, intron 1 of 1)	MIRc|SINE|MIR	-1171	NM_001097577	283	Hs.283749	NM_001097577	ENSG00000214274	ANG	ALS9|HEL168|RAA1|RNASE4|RNASE5	angiogenin, ribonuclease, RNase A family, 5	protein-coding
chr14	21154527	21154988	217	NA	intron (NM_002937, intron 1 of 1)	intron (NM_002937, intron 1 of 1)	-2175	NM_001097577	283	Hs.283749	NM_001097577	ENSG00000214274	ANG	ALS9|HEL168|RAA1|RNASE4|RNASE5	angiogenin, ribonuclease, RNase A family, 5	protein-coding
chr9	129829133	129829423	69	NA	intron (NM_001190728, intron 6 of 16)	intron (NM_001190728, intron 6 of 16)	55766	NM_012098	23452	Hs.653262	NM_012098	ENSG00000136859	ANGPTL2	ARP2|HARP	angiopoietin-like 2	protein-coding
chr9	129830132	129830622	52	NA	intron (NM_001190728, intron 6 of 16)	intron (NM_001190728, intron 6 of 16)	54667	NM_012098	23452	Hs.653262	NM_012098	ENSG00000136859	ANGPTL2	ARP2|HARP	angiopoietin-like 2	protein-coding
chr9	129949778	129950038	21	NA	intron (NM_001190728, intron 10 of 16)	intron (NM_001190728, intron 10 of 16)	-64864	NM_012098	23452	Hs.653262	NM_012098	ENSG00000136859	ANGPTL2	ARP2|HARP	angiopoietin-like 2	protein-coding
chr8	41587374	41587951	450	NA	intron (NM_001142446, intron 3 of 42)	intron (NM_001142446, intron 3 of 42)	-64858	NM_020480	286	Hs.708861	XM_005273476	ENSG00000029534	ANK1	ANK|SPH1|SPH2	ankyrin 1, erythrocytic	protein-coding
chr10	61848778	61849382	583	NA	intron (NM_001204404, intron 29 of 43)	intron (NM_001204404, intron 29 of 43)	51694	NM_001149	288	Hs.499725	XM_005269710	ENSG00000151150	ANK3	ANKYRIN-G|MRT37	ankyrin 3, node of Ranvier (ankyrin G)	protein-coding
chr10	61936665	61937080	310	NA	intron (NM_001204404, intron 18 of 43)	L2c|LINE|L2	-36098	NM_001149	288	Hs.499725	XM_005269710	ENSG00000151150	ANK3	ANKYRIN-G|MRT37	ankyrin 3, node of Ranvier (ankyrin G)	protein-coding
chr10	62464230	62464694	208	NA	intron (NM_001204403, intron 1 of 43)	intron (NM_001204403, intron 1 of 43)	28822	NM_001204403	288	Hs.499725	XM_005269710	ENSG00000151150	ANK3	ANKYRIN-G|MRT37	ankyrin 3, node of Ranvier (ankyrin G)	protein-coding
chr17	4144848	4145183	125	NA	intron (NM_001257999, intron 2 of 24)	intron (NM_001257999, intron 2 of 24)	22127	NM_001257999	51479	Hs.696087	XM_005256679	ENSG00000185722	ANKFY1	ANKHZN|BTBD23|ZFYVE14	ankyrin repeat and FYVE domain containing 1	protein-coding
chr5	15009571	15009899	191	NA	Intergenic	Intergenic	-137848	NM_054027	56172	Hs.156727	XM_005248324	ENSG00000154122	ANKH	ANK|CCAL2|CMDJ|CPPDD|HANK|MANK	ANKH inorganic pyrophosphate transport regulator	protein-coding
chr9	95596112	95596354	45	NA	intron (NR_026868, intron 8 of 9)	LTR22B|LTR|ERVK	24340	NR_026868	138649	Hs.643597	NM_001010925	ENSG00000187984	ANKRD19P	ANKRD19|bA526D8.2	ankyrin repeat domain 19, pseudogene	pseudo
chr18	14225337	14225771	38	NA	intron (NR_040113, intron 15 of 15)	SVA_A|Other|Other	46458	NR_040113	440482	Hs.632352	NM_001029999		ANKRD20A5P	ANKRD20A5	ankyrin repeat domain 20 family, member A5, pseudogene	pseudo
chr17	48763876	48764484	850	NA	intron (NM_003786, intron 29 of 30)	intron (NM_003786, intron 29 of 30)	21090	NM_052855	91369	Hs.463426	NM_052855	ENSG00000154945	ANKRD40	-	ankyrin repeat domain 40	protein-coding
chr8	101541143	101541636	189	NA	intron (NM_001270379, intron 3 of 5)	MIRb|SINE|MIR	30550	NM_001270378	157567	Hs.530199	XM_005250797	ENSG00000186106	ANKRD46	ANK-S|GENX-115279	ankyrin repeat domain 46	protein-coding
chr4	125353735	125354030	124	NA	Intergenic	Intergenic	280005	NM_001167882	57182	Hs.480694	NM_001167882	ENSG00000151458	ANKRD50	-	ankyrin repeat domain 50	protein-coding
chr4	125561173	125561419	55	NA	Intergenic	MIR|SINE|MIR	72591	NM_001167882	57182	Hs.480694	NM_001167882	ENSG00000151458	ANKRD50	-	ankyrin repeat domain 50	protein-coding
chr6	90147827	90148208	239	NA	intron (NM_014942, intron 1 of 15)	MLT1J2|LTR|ERVL-MaLR	5120	NM_001242809	22881	Hs.702213	XM_005248679	ENSG00000135299	ANKRD6	-	ankyrin repeat domain 6	protein-coding
chr22	17212004	17212499	163	NA	Intergenic	Intergenic	-55821	NR_040115	23783	Hs.627452	NR_040115		ANKRD62P1-PARP4P3	ADPRTL4|PARP4P3	ANKRD62P1-PARP4P3 readthrough, transcribed pseudogene	pseudo
chr7	118512861	118513150	63	NA	Intergenic	Intergenic	648293	NM_019644	56311	Hs.729340	XM_005250499	ENSG00000106013	ANKRD7	TSA806	ankyrin repeat domain 7	protein-coding
chr14	102931263	102931475	35	NA	intron (NM_014844, intron 16 of 19)	intron (NM_014844, intron 16 of 19)	44759	NM_152326	122416	Hs.432945	XM_005267310	ENSG00000156381	ANKRD9	-	ankyrin repeat domain 9	protein-coding
chr16	21272048	21272614	609	NA	intron (NM_001888, intron 9 of 9)	MIR|SINE|MIR	27315	NM_145865	257629	Hs.115959	NM_145865	ENSG00000175311	ANKS4B	HARP	ankyrin repeat and sterile alpha motif domain containing 4B	protein-coding
chr16	21244799	21245029	70	NA	promoter-TSS (NM_145865)	promoter-TSS (NM_145865)	-102	NM_145865	257629	Hs.115959	NM_145865	ENSG00000175311	ANKS4B	HARP	ankyrin repeat and sterile alpha motif domain containing 4B	protein-coding
chr9	101544004	101544867	107	NA	intron (NM_173551, intron 5 of 14)	intron (NM_173551, intron 5 of 14)	14359	NM_173551	203286	Hs.406890	XM_005251793	ENSG00000165138	ANKS6	ANKRD14|NPHP16|PKDR1|SAMD6	ankyrin repeat and sterile alpha motif domain containing 6	protein-coding
chr11	69814726	69815315	582	NA	Intergenic	Intergenic	106434	NR_103835	100009613	Hs.743025	XR_247176		ANO1-AS2	C11orf78|NCRNA00224|RP11-626H12.4	ANO1 antisense RNA 2 (head to head)	ncRNA
chr11	69839049	69839713	240	NA	Intergenic	Intergenic	82073	NR_103835	100009613	Hs.743025	XR_247176		ANO1-AS2	C11orf78|NCRNA00224|RP11-626H12.4	ANO1 antisense RNA 2 (head to head)	ncRNA
chr11	69794389	69795033	213	NA	Intergenic	Intergenic	126743	NR_103835	100009613	Hs.743025	XR_247176		ANO1-AS2	C11orf78|NCRNA00224|RP11-626H12.4	ANO1 antisense RNA 2 (head to head)	ncRNA
chr11	69839049	69839713	125	NA	Intergenic	Intergenic	82073	NR_103835	100009613	Hs.743025	XR_247176		ANO1-AS2	C11orf78|NCRNA00224|RP11-626H12.4	ANO1 antisense RNA 2 (head to head)	ncRNA
chr12	5892265	5892660	144	NA	intron (NM_001278596, intron 10 of 25)	Plat_L3|LINE|CR1	161963	NM_001278596	57101	Hs.148970	NM_020373	ENSG00000047617	ANO2	C12orf3|TMEM16B	anoctamin 2	protein-coding
chr12	101445940	101446332	382	NA	intron (NM_001286615, intron 14 of 27)	intron (NM_001286615, intron 14 of 27)	150712	NM_001286616	121601	Hs.58785	XM_005268648	ENSG00000151572	ANO4	TMEM16D	anoctamin 4	protein-coding
chr12	101376349	101376812	155	NA	intron (NM_001286615, intron 7 of 27)	intron (NM_001286615, intron 7 of 27)	81156	NM_001286616	121601	Hs.58785	XM_005268648	ENSG00000151572	ANO4	TMEM16D	anoctamin 4	protein-coding
chr11	21583167	21583431	97	NA	intron (NM_201551, intron 16 of 18)	intron (NM_201551, intron 16 of 18)	-631423	NM_213599	203859	Hs.154329	XM_005252820	ENSG00000171714	ANO5	GDD1|LGMD2L|TMEM16E	anoctamin 5	protein-coding
chr11	21861482	21861717	93	NA	Intergenic	Intergenic	-353123	NM_213599	203859	Hs.154329	XM_005252820	ENSG00000171714	ANO5	GDD1|LGMD2L|TMEM16E	anoctamin 5	protein-coding
chr11	21864322	21864520	25	NA	Intergenic	LTR89|LTR|ERVL?	-350301	NM_213599	203859	Hs.154329	XM_005252820	ENSG00000171714	ANO5	GDD1|LGMD2L|TMEM16E	anoctamin 5	protein-coding
chr1	150179575	150179852	173	NA	Intergenic	MER89|LTR|ERV1	27313	NM_001136479	81611	Hs.656466	XM_005245513	ENSG00000143401	ANP32E	LANP-L|LANPL	acidic (leucine-rich) nuclear phosphoprotein 32 family, member E	protein-coding
chr4	80956533	80956989	708	NA	intron (NM_001286780, intron 8 of 16)	intron (NM_001286780, intron 8 of 16)	37716	NM_001286781	118429	Hs.162963	XM_005262727	ENSG00000163297	ANTXR2	CMG-2|CMG2|HFS|ISH|JHF	anthrax toxin receptor 2	protein-coding
chr9	75723944	75724434	52	NA	Intergenic	Intergenic	-42592	NM_000700	301	Hs.494173	XM_005251950	ENSG00000135046	ANXA1	ANX1|LPC1	annexin A1	protein-coding
chr4	169019582	169019793	22	NA	intron (NM_007193, intron 1 of 11)	intron (NM_007193, intron 1 of 11)	5999	NM_007193	11199	Hs.188401	NM_007193	ENSG00000109511	ANXA10	ANX14	annexin A10	protein-coding
chr10	81955878	81956425	138	NA	intron (NM_001278408, intron 1 of 16)	intron (NM_001278408, intron 1 of 16)	8096	NM_001278408	311	Hs.530291	XM_005269741	ENSG00000122359	ANXA11	ANX11|CAP50	annexin A11	protein-coding
chr8	124732296	124732561	98	NA	intron (NM_004306, intron 1 of 10)	intron (NM_004306, intron 1 of 10)	17219	NM_001003954	312	Hs.181107	NM_001003954	ENSG00000104537	ANXA13	ANX13|ISA	annexin A13	protein-coding
chr15	60683204	60683646	303	NA	intron (NM_001136015, intron 1 of 13)	MIRc|SINE|MIR	6760	NM_001002858	302	Hs.511605	XM_005254327	ENSG00000182718	ANXA2	ANX2|ANX2L4|CAL1H|LIP2|LPC2|LPC2D|P36|PAP-IV	annexin A2	protein-coding
chr15	60671974	60672284	148	NA	intron (NM_001002857, intron 4 of 13)	intron (NM_001002857, intron 4 of 13)	18056	NM_001002858	302	Hs.511605	XM_005254327	ENSG00000182718	ANXA2	ANX2|ANX2L4|CAL1H|LIP2|LPC2|LPC2D|P36|PAP-IV	annexin A2	protein-coding
chr15	60686315	60686724	129	NA	intron (NM_001136015, intron 1 of 13)	intron (NM_001136015, intron 1 of 13)	3666	NM_001002858	302	Hs.511605	XM_005254327	ENSG00000182718	ANXA2	ANX2|ANX2L4|CAL1H|LIP2|LPC2|LPC2D|P36|PAP-IV	annexin A2	protein-coding
chr15	60685211	60685569	112	NA	intron (NM_001136015, intron 1 of 13)	intron (NM_001136015, intron 1 of 13)	4795	NM_001002858	302	Hs.511605	XM_005254327	ENSG00000182718	ANXA2	ANX2|ANX2L4|CAL1H|LIP2|LPC2|LPC2D|P36|PAP-IV	annexin A2	protein-coding
chr10	66627221	66627941	1380	NA	Intergenic	MER61E|LTR|ERV1	42296	NR_001446	305	Hs.591361	NR_001446		ANXA2P3	ANX2L3|ANX2P3|LIP2|LPC2C	annexin A2 pseudogene 3	pseudo
chr10	67621075	67621446	171	NA	Intergenic	LTR8A|LTR|ERV1	1035975	NR_001446	305	Hs.591361	NR_001446		ANXA2P3	ANX2L3|ANX2P3|LIP2|LPC2C	annexin A2 pseudogene 3	pseudo
chr10	67435088	67435329	76	NA	Intergenic	LTR22A|LTR|ERVK	849923	NR_001446	305	Hs.591361	NR_001446		ANXA2P3	ANX2L3|ANX2P3|LIP2|LPC2C	annexin A2 pseudogene 3	pseudo
chr4	79488523	79488966	183	NA	intron (NM_005139, intron 2 of 12)	MER34B|LTR|ERV1	16002	NM_005139	306	Hs.480042	XM_005262973	ENSG00000138772	ANXA3	ANX3	annexin A3	protein-coding
chr4	79331001	79331295	78	NA	intron (NM_025074, intron 31 of 73)	intron (NM_025074, intron 31 of 73)	-141594	NM_005139	306	Hs.480042	XM_005262973	ENSG00000138772	ANXA3	ANX3	annexin A3	protein-coding
chr2	69991380	69991786	276	NA	intron (NM_001153, intron 1 of 12)	intron (NM_001153, intron 1 of 12)	22456	NM_001153	307	Hs.422986	XM_005264277	ENSG00000196975	ANXA4	ANX4|PIG28|ZAP36	annexin A4	protein-coding
chr2	70008524	70008855	101	NA	5' UTR (NM_001153, exon 2 of 13)	5' UTR (NM_001153, exon 2 of 13)	39562	NM_001153	307	Hs.422986	XM_005264277	ENSG00000196975	ANXA4	ANX4|PIG28|ZAP36	annexin A4	protein-coding
chr4	122564149	122564536	103	NA	Intergenic	MER68|LTR|ERVL	53805	NM_001154	308	Hs.480653	NM_001154	ENSG00000164111	ANXA5	ANX5|ENX2|HEL-S-7|PP4|RPRGL3	annexin A5	protein-coding
chr1	150954101	150954746	658	NA	promoter-TSS (NM_003568)	promoter-TSS (NM_003568)	-76	NM_003568	8416	Hs.3346	XM_005245539	ENSG00000143412	ANXA9	ANX31	annexin A9	protein-coding
chr7	150528039	150528301	86	NA	Intergenic	Intergenic	-21395	NM_001272072	26	Hs.733889	XM_005249966	ENSG00000002726	AOC1	ABP|ABP1|DAO|DAO1|KAO	amine oxidase, copper containing 1	protein-coding
chr11	56653961	56654251	166	NA	Intergenic	Intergenic	38152	NR_110136	101927120	Hs.472675	XR_247220	ENSG00000255433	AP000479.1	-	uncharacterized LOC101927120	ncRNA
chr11	56652538	56653165	88	NA	Intergenic	Intergenic	36897	NR_110136	101927120	Hs.472675	XR_247220	ENSG00000255433	AP000479.1	-	uncharacterized LOC101927120	ncRNA
chr4	113152416	113153170	504	NA	promoter-TSS (NM_001128426)	promoter-TSS (NM_001128426)	-102	NM_001128426	55435	Hs.606210	XM_005263116	ENSG00000138660	AP1AR	2C18|C4orf16|GBAR|gamma-BAR	adaptor-related protein complex 1 associated regulatory protein	protein-coding
chr4	113129496	113129853	102	NA	Intergenic	HERV9-int|LTR|ERV1	-23221	NM_001128426	55435	Hs.606210	XM_005263116	ENSG00000138660	AP1AR	2C18|C4orf16|GBAR|gamma-BAR	adaptor-related protein complex 1 associated regulatory protein	protein-coding
chr22	29781217	29781688	180	NA	intron (NM_145730, intron 1 of 20)	L2b|LINE|L2	3120	NM_001127	162	Hs.368794	XM_005261378	ENSG00000100280	AP1B1	ADTB1|AP105A|BAM22|CLAPB2	adaptor-related protein complex 1, beta 1 subunit	protein-coding
chr22	29790889	29791214	95	NA	Intergenic	Intergenic	-6479	NM_145730	162	Hs.368794	XM_005261378	ENSG00000100280	AP1B1	ADTB1|AP105A|BAM22|CLAPB2	adaptor-related protein complex 1, beta 1 subunit	protein-coding
chr19	16308014	16308345	57	NA	promoter-TSS (NM_032493)	promoter-TSS (NM_032493)	-486	NM_001130524	8907	Hs.71040	XM_005260138	ENSG00000072958	AP1M1	AP47|CLAPM2|CLTNM|MU-1A	adaptor-related protein complex 1, mu 1 subunit	protein-coding
chr7	100787473	100787694	65	NA	Intergenic	Intergenic	-10103	NM_001283	1174	Hs.489365	XM_005250139	ENSG00000106367	AP1S1	AP19|CLAPS1|MEDNIK|SIGMA1A|WUGSC:H_DJ0747G18.2	adaptor-related protein complex 1, sigma 1 subunit	protein-coding
chr2	224725836	224726568	1107	NA	Intergenic	MIRb|SINE|MIR	-23883	NM_001039569	130340	Hs.632555	XM_005246295	ENSG00000152056	AP1S3	-	adaptor-related protein complex 1, sigma 3 subunit	protein-coding
chr2	224715504	224716087	441	NA	Intergenic	THE1B-int|LTR|ERVL-MaLR	-13476	NM_001039569	130340	Hs.632555	XM_005246295	ENSG00000152056	AP1S3	-	adaptor-related protein complex 1, sigma 3 subunit	protein-coding
chr19	50268806	50269168	147	NA	Intergenic	Intergenic	-1193	NM_130787	160	Hs.467125	XM_005258573	ENSG00000196961	AP2A1	ADTAA|AP2-ALPHA|CLAPA1	adaptor-related protein complex 2, alpha 1 subunit	protein-coding
chr10	26637803	26638503	1882	NA	Intergenic	MER11A|LTR|ERVK	-89113	NM_019043	54518	Hs.310421	XM_005252471	ENSG00000077420	APBB1IP	INAG1|PREL1|RARP1|RIAM	amyloid beta (A4) precursor protein-binding, family B, member 1 interacting protein	protein-coding
chr10	26655865	26656640	892	NA	Intergenic	MER11A|LTR|ERVK	-71014	NM_019043	54518	Hs.310421	XM_005252471	ENSG00000077420	APBB1IP	INAG1|PREL1|RARP1|RIAM	amyloid beta (A4) precursor protein-binding, family B, member 1 interacting protein	protein-coding
chr10	26654586	26654919	126	NA	Intergenic	Intergenic	-72514	NM_019043	54518	Hs.310421	XM_005252471	ENSG00000077420	APBB1IP	INAG1|PREL1|RARP1|RIAM	amyloid beta (A4) precursor protein-binding, family B, member 1 interacting protein	protein-coding
chr4	41134406	41134676	35	NA	intron (NM_001166050, intron 2 of 17)	intron (NM_001166050, intron 2 of 17)	82094	NM_001166050	323	Hs.479602	XM_005248094	ENSG00000163697	APBB2	FE65L|FE65L1	amyloid beta (A4) precursor protein-binding, family B, member 2	protein-coding
chr18	10359559	10359808	132	NA	Intergenic	Zaphod|DNA|hAT-Tip100	-94942	NM_153000	147495	Hs.293274	XM_005258083		APCDD1	B7323|DRAPC1|HHS|HTS	adenomatosis polyposis coli down-regulated 1	protein-coding
chr18	10408947	10409244	107	NA	Intergenic	Intergenic	-45530	NM_153000	147495	Hs.293274	XM_005258083		APCDD1	B7323|DRAPC1|HHS|HTS	adenomatosis polyposis coli down-regulated 1	protein-coding
chr1	10490370	10490883	103	NA	promoter-TSS (NM_001243768)	promoter-TSS (NM_001243768)	-178	NR_036462	378708	Hs.412311	XM_005263453		APITD1	CENP-S|CENPS|FAAP16|MHF1	apoptosis-inducing, TAF9-like domain 1	protein-coding
chrX	128770324	128770679	137	NA	Intergenic	Intergenic	18432	NM_017413	8862	Hs.303084	NM_017413	ENSG00000171388	APLN	APEL|XNPEP2	apelin	protein-coding
chr11	116678915	116679978	3445	NA	Intergenic	Intergenic	14565	NM_000482	337	Hs.1247	NM_000482	ENSG00000110244	APOA4	-	apolipoprotein A-IV	protein-coding
chr11	116678915	116679978	280	NA	Intergenic	Intergenic	14565	NM_000482	337	Hs.1247	NM_000482	ENSG00000110244	APOA4	-	apolipoprotein A-IV	protein-coding
chr12	7818204	7819659	635	NA	promoter-TSS (NM_001644)	promoter-TSS (NM_001644)	-429	NM_001644	339	Hs.560	XM_005253355	ENSG00000111701	APOBEC1	APOBEC-1|BEDP|CDAR1|HEPR	apolipoprotein B mRNA editing enzyme, catalytic polypeptide 1	protein-coding
chr12	7818204	7819659	331	NA	promoter-TSS (NM_001644)	promoter-TSS (NM_001644)	-429	NM_001644	339	Hs.560	XM_005253355	ENSG00000111701	APOBEC1	APOBEC-1|BEDP|CDAR1|HEPR	apolipoprotein B mRNA editing enzyme, catalytic polypeptide 1	protein-coding
chr22	39359767	39360404	1860	NA	TTS (NM_001270406)	TTS (NM_001270406)	6558	NM_001270406	200315	Hs.226307	XM_005261386	ENSG00000128383	APOBEC3A	A3A|ARP3|PHRBN|bK150C2.1	apolipoprotein B mRNA editing enzyme, catalytic polypeptide-like 3A	protein-coding
chr22	39331102	39331399	122	NA	Intergenic	Intergenic	-22277	NM_145699	200315	Hs.226307	XM_005261386	ENSG00000128383	APOBEC3A	A3A|ARP3|PHRBN|bK150C2.1	apolipoprotein B mRNA editing enzyme, catalytic polypeptide-like 3A	protein-coding
chr3	195316408	195316862	138	NA	Intergenic	MER11A|LTR|ERVK	-5559	NM_001647	347	Hs.522555	NM_001647	ENSG00000189058	APOD	-	apolipoprotein D	protein-coding
chr19	45407005	45407304	25	NA	TTS (NM_006114)	TTS (NM_006114)	-1885	NM_000041	348	Hs.654439	XM_005258867	ENSG00000130203	APOE	AD2|LDLCQ5|LPG	apolipoprotein E	protein-coding
chr22	36616563	36616779	52	NA	Intergenic	MLT2B3|LTR|ERVL	-15792	NM_030643	80832	Hs.115099	NM_030643		APOL4	APOL-IV|APOLIV	apolipoprotein L, 4	protein-coding
chr22	36605510	36605800	41	NA	Intergenic	MER11A|LTR|ERVK	-4776	NM_030643	80832	Hs.115099	NM_030643		APOL4	APOL-IV|APOLIV	apolipoprotein L, 4	protein-coding
chr21	27322090	27322400	75	NA	intron (NM_001136129, intron 10 of 14)	MIRb|SINE|MIR	190463	NM_001136016	351	Hs.434980	NM_000484	ENSG00000142192	APP	AAA|ABETA|ABPP|AD1|APPI|CTFgamma|CVAP|PN-II|PN2	amyloid beta (A4) precursor protein	protein-coding
chr12	105608096	105609123	440	NA	intron (NM_001251904, intron 4 of 20)	MER21C|LTR|ERVL	18574	NM_001251905	55198	Hs.506603	XM_005269001	ENSG00000136044	APPL2	DIP13B	adaptor protein, phosphotyrosine interaction, PH domain and leucine zipper containing 2	protein-coding
chr12	105675502	105675863	173	NA	Intergenic	Intergenic	-45674	NM_001251904	55198	Hs.506603	XM_005269001	ENSG00000136044	APPL2	DIP13B	adaptor protein, phosphotyrosine interaction, PH domain and leucine zipper containing 2	protein-coding
chr11	77300699	77301503	1664	NA	exon (NM_173039, exon 1 of 3)	exon (NM_173039, exon 1 of 3)	421	NM_173039	282679	Hs.503345	XM_005273915	ENSG00000178301	AQP11	AQPX1	aquaporin 11	protein-coding
chr11	77313355	77313766	323	NA	intron (NM_173039, intron 1 of 2)	Tigger12c|DNA|TcMar-Tigger	12880	NM_173039	282679	Hs.503345	XM_005273915	ENSG00000178301	AQP11	AQPX1	aquaporin 11	protein-coding
chr9	33446828	33447236	131	NA	intron (NM_004925, intron 1 of 5)	intron (NM_004925, intron 1 of 5)	599	NM_004925	360	Hs.234642	XM_005251452	ENSG00000165272	AQP3	AQP-3|GIL	aquaporin 3 (Gill blood group)	protein-coding
chr9	33391296	33391647	70	NA	intron (NM_001170, intron 3 of 7)	intron (NM_001170, intron 3 of 7)	11046	NM_001170	364	Hs.455323	XM_005251453	ENSG00000165269	AQP7	AQP7L|AQP9|AQPap|GLYCQTL	aquaporin 7	protein-coding
chr9	67292947	67293247	198	NA	Intergenic	Intergenic	-3605	NR_002817	375719	Hs.658215	NR_002817		AQP7P1	bA251O17.3	aquaporin 7 pseudogene 1	pseudo
chr4	34734708	34735194	413	NA	Intergenic	L2|LINE|L2	1511028	NM_015230	116984	Hs.479451	XM_005262638	ENSG00000047365	ARAP2	CENTD1|PARX	ArfGAP with RhoGAP domain, ankyrin repeat and PH domain 2	protein-coding
chr5	141103542	141103843	81	NA	Intergenic	MSTA-int|LTR|ERVL-MaLR	-41892	NM_022481	64411	Hs.726187	XM_005268497	ENSG00000120318	ARAP3	CENTD3|DRAG1	ArfGAP with RhoGAP domain, ankyrin repeat and PH domain 3	protein-coding
chr8	143686890	143687543	230	NA	Intergenic	MSTD-int|LTR|ERVL-MaLR	8617	NM_015193	23237	Hs.743662	NM_015193		ARC	Arg3.1	activity-regulated cytoskeleton-associated protein	protein-coding
chr8	143632136	143632446	114	NA	Intergenic	Intergenic	63542	NM_015193	23237	Hs.743662	NM_015193		ARC	Arg3.1	activity-regulated cytoskeleton-associated protein	protein-coding
chr4	75549935	75550271	225	NA	Intergenic	Intergenic	69474	NM_001657	374	Hs.270833	NM_001657	ENSG00000109321	AREG	AR|CRDGF|SDGF	amphiregulin	protein-coding
chr4	75579379	75579785	121	NA	Intergenic	Intergenic	98953	NM_001657	374	Hs.270833	NM_001657	ENSG00000109321	AREG	AR|CRDGF|SDGF	amphiregulin	protein-coding
chr8	68292986	68293382	78	NA	Intergenic	MER50|LTR|ERV1	-37272	NM_006421	10565	Hs.656902	XM_005251134	ENSG00000066777	ARFGEF1	ARFGEP1|BIG1|P200	ADP-ribosylation factor guanine nucleotide-exchange factor 1 (brefeldin A-inhibited)	protein-coding
chr11	46721571	46722298	240	NA	promoter-TSS (NM_024741)	promoter-TSS (NM_024741)	281	NM_004308	392	Hs.138860	XM_005252917	ENSG00000175220	ARHGAP1	CDC42GAP|RHOGAP|RHOGAP1|p50rhoGAP	Rho GTPase activating protein 1	protein-coding
chr11	46721571	46722298	137	NA	promoter-TSS (NM_024741)	promoter-TSS (NM_024741)	281	NM_004308	392	Hs.138860	XM_005252917	ENSG00000175220	ARHGAP1	CDC42GAP|RHOGAP|RHOGAP1|p50rhoGAP	Rho GTPase activating protein 1	protein-coding
chr10	32231776	32232213	929	NA	Intergenic	Intergenic	-14190	NM_018287	94134	Hs.741991	XM_005252644	ENSG00000165322	ARHGAP12	-	Rho GTPase activating protein 12	protein-coding
chr10	32170409	32170830	400	NA	intron (NM_001270695, intron 3 of 18)	MIRb|SINE|MIR	27235	NM_001270699	94134	Hs.741991	XM_005252644	ENSG00000165322	ARHGAP12	-	Rho GTPase activating protein 12	protein-coding
chr10	32229853	32230368	169	NA	Intergenic	Intergenic	-12306	NM_018287	94134	Hs.741991	XM_005252644	ENSG00000165322	ARHGAP12	-	Rho GTPase activating protein 12	protein-coding
chr10	32047954	32048250	115	NA	Intergenic	Intergenic	149752	NM_001270699	94134	Hs.741991	XM_005252644	ENSG00000165322	ARHGAP12	-	Rho GTPase activating protein 12	protein-coding
chr16	25000430	25000758	217	NA	intron (NM_001006634, intron 1 of 19)	intron (NM_001006634, intron 1 of 19)	26105	NM_018054	55114	Hs.373793	XM_005255413	ENSG00000140750	ARHGAP17	MST066|MST110|MSTP038|MSTP066|MSTP110|NADRIN|PP367|PP4534|RICH-1|RICH1|WBP15	Rho GTPase activating protein 17	protein-coding
chr6	129814680	129815123	194	NA	intron (NM_000426, intron 58 of 64)	MIRb|SINE|MIR	216469	NM_033515	93663	Hs.486458	XM_005267212	ENSG00000146376	ARHGAP18	MacGAP|SENEX|bA307O14.2	Rho GTPase activating protein 18	protein-coding
chr10	24970041	24970454	292	NA	intron (NM_020824, intron 2 of 25)	intron (NM_020824, intron 2 of 25)	42350	NM_020824	57584	Hs.524195	XM_005252542	ENSG00000107863	ARHGAP21	ARHGAP10	Rho GTPase activating protein 21	protein-coding
chr4	86380904	86381166	156	NA	Intergenic	Intergenic	-15249	NM_001025616	83478	Hs.444229	XM_005263263	ENSG00000138639	ARHGAP24	FILGAP|RC-GAP72|RCGAP72|p73|p73RhoGAP	Rho GTPase activating protein 24	protein-coding
chr5	142176152	142176416	71	NA	intron (NM_015071, intron 1 of 22)	intron (NM_015071, intron 1 of 22)	25992	NM_001135608	23092	Hs.654668	XM_005268398	ENSG00000145819	ARHGAP26	GRAF|GRAF1|OPHN1L|OPHN1L1	Rho GTPase activating protein 26	protein-coding
chr5	142200034	142200279	79	NA	intron (NM_015071, intron 1 of 22)	intron (NM_015071, intron 1 of 22)	48319	NR_046680	100874239	Hs.570896	NR_046680	ENSG00000226272	ARHGAP26-AS1	AC008533.1	ARHGAP26 antisense RNA 1	ncRNA
chr5	142254234	142254441	44	NA	intron (NM_015071, intron 2 of 22)	intron (NM_015071, intron 2 of 22)	-5862	NR_046680	100874239	Hs.570896	NR_046680	ENSG00000226272	ARHGAP26-AS1	AC008533.1	ARHGAP26 antisense RNA 1	ncRNA
chr17	43484043	43484853	1006	NA	intron (NM_001282290, intron 1 of 16)	intron (NM_001282290, intron 1 of 16)	18564	NM_199282	201176	Hs.205326	XM_005257127	ENSG00000159314	ARHGAP27	CAMGAP1|PP905|SH3D20|SH3P20	Rho GTPase activating protein 27	protein-coding
chr17	43490861	43491148	193	NA	intron (NM_001282290, intron 1 of 16)	intron (NM_001282290, intron 1 of 16)	12008	NM_199282	201176	Hs.205326	XM_005257127	ENSG00000159314	ARHGAP27	CAMGAP1|PP905|SH3D20|SH3P20	Rho GTPase activating protein 27	protein-coding
chr17	43492971	43493192	34	NA	intron (NM_001282290, intron 1 of 16)	intron (NM_001282290, intron 1 of 16)	9931	NM_199282	201176	Hs.205326	XM_005257127	ENSG00000159314	ARHGAP27	CAMGAP1|PP905|SH3D20|SH3P20	Rho GTPase activating protein 27	protein-coding
chr11	129152985	129153347	387	NA	Intergenic	L2a|LINE|L2	-91073	NM_001142685	9743	Hs.440379	XM_005271736	ENSG00000134909	ARHGAP32	GC-GAP|GRIT|PX-RICS|RICS|p200RhoGAP|p250GAP	Rho GTPase activating protein 32	protein-coding
chr11	128883963	128884333	98	NA	intron (NM_001142685, intron 10 of 21)	intron (NM_001142685, intron 10 of 21)	9940	NM_014715	9743	Hs.440379	XM_005271736	ENSG00000134909	ARHGAP32	GC-GAP|GRIT|PX-RICS|RICS|p200RhoGAP|p250GAP	Rho GTPase activating protein 32	protein-coding
chr11	129129809	129130047	96	NA	Intergenic	Intergenic	-67835	NM_001142685	9743	Hs.440379	XM_005271736	ENSG00000134909	ARHGAP32	GC-GAP|GRIT|PX-RICS|RICS|p200RhoGAP|p250GAP	Rho GTPase activating protein 32	protein-coding
chr19	47454719	47455403	939	NA	intron (NM_004491, intron 2 of 5)	intron (NM_004491, intron 2 of 5)	33128	NM_004491	2909	Hs.509447	XM_005258823	ENSG00000160007	ARHGAP35	GRF-1|GRLF1|P190-A|P190A|p190ARhoGAP|p190RhoGAP	Rho GTPase activating protein 35	protein-coding
chr19	47428573	47429259	621	NA	intron (NM_004491, intron 1 of 5)	intron (NM_004491, intron 1 of 5)	6983	NM_004491	2909	Hs.509447	XM_005258823	ENSG00000160007	ARHGAP35	GRF-1|GRLF1|P190-A|P190A|p190ARhoGAP|p190RhoGAP	Rho GTPase activating protein 35	protein-coding
chr19	47393893	47394348	227	NA	Intergenic	Intergenic	-27813	NM_004491	2909	Hs.509447	XM_005258823	ENSG00000160007	ARHGAP35	GRF-1|GRLF1|P190-A|P190A|p190ARhoGAP|p190RhoGAP	Rho GTPase activating protein 35	protein-coding
chr19	47428573	47429259	119	NA	intron (NM_004491, intron 1 of 5)	intron (NM_004491, intron 1 of 5)	6983	NM_004491	2909	Hs.509447	XM_005258823	ENSG00000160007	ARHGAP35	GRF-1|GRLF1|P190-A|P190A|p190ARhoGAP|p190RhoGAP	Rho GTPase activating protein 35	protein-coding
chr11	100646850	100647262	391	NA	intron (NM_152432, intron 2 of 23)	intron (NM_152432, intron 2 of 23)	88649	NM_152432	143872	Hs.741465	NM_152432	ENSG00000165895	ARHGAP42	GRAF3	Rho GTPase activating protein 42	protein-coding
chr11	100656463	100656802	155	NA	intron (NM_152432, intron 2 of 23)	MIRb|SINE|MIR	98225	NM_152432	143872	Hs.741465	NM_152432	ENSG00000165895	ARHGAP42	GRAF3	Rho GTPase activating protein 42	protein-coding
chr11	100647752	100648288	60	NA	intron (NM_152432, intron 2 of 23)	intron (NM_152432, intron 2 of 23)	89613	NM_152432	143872	Hs.741465	NM_152432	ENSG00000165895	ARHGAP42	GRAF3	Rho GTPase activating protein 42	protein-coding
chr14	32553033	32553321	158	NA	intron (NM_001030055, intron 1 of 6)	intron (NM_001030055, intron 1 of 6)	6682	NM_001030055	394	Hs.592313	XM_005267635	ENSG00000100852	ARHGAP5	GFI2|RhoGAP5|p190-B|p190BRhoGAP	Rho GTPase activating protein 5	protein-coding
chr14	32413521	32414052	899	NA	Intergenic	Intergenic	132119	NR_027263	84837	Hs.496755	NM_032751	ENSG00000258655	ARHGAP5-AS1	C14orf128|RP11-431H16.2	ARHGAP5 antisense RNA 1 (head to head)	ncRNA
chr14	32405333	32405658	242	NA	Intergenic	MIRb|SINE|MIR	140410	NR_027263	84837	Hs.496755	NM_032751	ENSG00000258655	ARHGAP5-AS1	C14orf128|RP11-431H16.2	ARHGAP5 antisense RNA 1 (head to head)	ncRNA
chrX	11286239	11286569	282	NA	intron (NM_006125, intron 1 of 10)	L2|LINE|L2	-2309	NM_013423	395	Hs.435291	XM_005274504	ENSG00000047648	ARHGAP6	RHOGAP6|RHOGAPX-1	Rho GTPase activating protein 6	protein-coding
chr19	42408618	42408928	163	NA	intron (NM_198977, intron 21 of 27)	intron (NM_198977, intron 21 of 27)	20327	NM_199002	9138	Hs.631550	XM_005259386	ENSG00000076928	ARHGEF1	GEF1|LBCL2|LSC|P115-RHOGEF|SUB1.5	Rho guanine nucleotide exchange factor (GEF) 1	protein-coding
chr19	42392017	42392259	46	NA	exon (NM_199002, exon 2 of 29)	exon (NM_199002, exon 2 of 29)	3692	NM_199002	9138	Hs.631550	XM_005259386	ENSG00000076928	ARHGEF1	GEF1|LBCL2|LSC|P115-RHOGEF|SUB1.5	Rho guanine nucleotide exchange factor (GEF) 1	protein-coding
chr1	17843200	17843776	415	NA	Intergenic	MIR|SINE|MIR	-22842	NM_018125	55160	Hs.443460	XM_005245921	ENSG00000074964	ARHGEF10L	GrinchGEF	Rho guanine nucleotide exchange factor (GEF) 10-like	protein-coding
chr1	17902479	17903085	309	NA	intron (NM_018125, intron 1 of 28)	intron (NM_018125, intron 1 of 28)	-4266	NM_001011722	55160	Hs.443460	XM_005245921	ENSG00000074964	ARHGEF10L	GrinchGEF	Rho guanine nucleotide exchange factor (GEF) 10-like	protein-coding
chr1	17914847	17915202	182	NA	intron (NM_001011722, intron 3 of 26)	intron (NM_001011722, intron 3 of 26)	7976	NM_001011722	55160	Hs.443460	XM_005245921	ENSG00000074964	ARHGEF10L	GrinchGEF	Rho guanine nucleotide exchange factor (GEF) 10-like	protein-coding
chr1	17839712	17840077	132	NA	Intergenic	MARNA|DNA|TcMar-Mariner	-26436	NM_018125	55160	Hs.443460	XM_005245921	ENSG00000074964	ARHGEF10L	GrinchGEF	Rho guanine nucleotide exchange factor (GEF) 10-like	protein-coding
chr1	3237051	3237471	488	NA	intron (NM_022114, intron 3 of 16)	intron (NM_022114, intron 3 of 16)	-133886	NM_014448	27237	Hs.87435	XM_005244740	ENSG00000130762	ARHGEF16	GEF16|NBR	Rho guanine nucleotide exchange factor (GEF) 16	protein-coding
chr1	3376576	3377001	332	NA	intron (NM_014448, intron 1 of 14)	intron (NM_014448, intron 1 of 14)	5641	NM_014448	27237	Hs.87435	XM_005244740	ENSG00000130762	ARHGEF16	GEF16|NBR	Rho guanine nucleotide exchange factor (GEF) 16	protein-coding
chr1	3209725	3210345	325	NA	intron (NM_022114, intron 3 of 16)	intron (NM_022114, intron 3 of 16)	-161112	NM_014448	27237	Hs.87435	XM_005244740	ENSG00000130762	ARHGEF16	GEF16|NBR	Rho guanine nucleotide exchange factor (GEF) 16	protein-coding
chr1	3272384	3272858	241	NA	intron (NM_022114, intron 3 of 16)	intron (NM_022114, intron 3 of 16)	-98526	NM_014448	27237	Hs.87435	XM_005244740	ENSG00000130762	ARHGEF16	GEF16|NBR	Rho guanine nucleotide exchange factor (GEF) 16	protein-coding
chr1	3371487	3371777	131	NA	intron (NM_014448, intron 1 of 14)	CpG	485	NM_014448	27237	Hs.87435	XM_005244740	ENSG00000130762	ARHGEF16	GEF16|NBR	Rho guanine nucleotide exchange factor (GEF) 16	protein-coding
chr1	3335956	3336283	40	NA	intron (NM_022114, intron 12 of 16)	intron (NM_022114, intron 12 of 16)	-35028	NM_014448	27237	Hs.87435	XM_005244740	ENSG00000130762	ARHGEF16	GEF16|NBR	Rho guanine nucleotide exchange factor (GEF) 16	protein-coding
chr19	7456289	7456557	91	NA	Intergenic	L2b|LINE|L2	-3576	NM_015318	23370	Hs.736818	XM_005272463	ENSG00000104880	ARHGEF18	P114-RhoGEF	Rho/Rac guanine nucleotide exchange factor (GEF) 18	protein-coding
chr5	72974208	72974654	383	NA	intron (NM_001080479, intron 1 of 36)	intron (NM_001080479, intron 1 of 36)	52448	NM_001080479	64283	Hs.482521	XM_005248568	ENSG00000214944	ARHGEF28	RGNEF|RIP2|p190RHOGEF	Rho guanine nucleotide exchange factor (GEF) 28	protein-coding
chr5	73088493	73088800	131	NA	intron (NM_001080479, intron 7 of 36)	intron (NM_001080479, intron 7 of 36)	-20697	NM_001244364	64283	Hs.482521	XM_005248568	ENSG00000214944	ARHGEF28	RGNEF|RIP2|p190RHOGEF	Rho guanine nucleotide exchange factor (GEF) 28	protein-coding
chr3	56816288	56816533	151	NA	intron (NM_001128615, intron 4 of 12)	intron (NM_001128615, intron 4 of 12)	-6665	NM_001128616	50650	Hs.476402	XM_005265186	ENSG00000163947	ARHGEF3	GEF3|STA3|XPLN	Rho guanine nucleotide exchange factor (GEF) 3	protein-coding
chr9	35669379	35669754	276	NA	Intergenic	Intergenic	-4288	NM_032818	84904	Hs.534579	XR_242516	ENSG00000137135	ARHGEF39	C9orf100|RP11-331F9.7	Rho guanine nucleotide exchange factor (GEF) 39	protein-coding
chr3	56938843	56939387	358	NA	intron (NM_001128615, intron 3 of 12)	L2c|LINE|L2	-34953	NR_046572	100874200	Hs.549631	NR_046572	ENSG00000240198	ARHGEF3-AS1	RP11-51O17.1	ARHGEF3 antisense RNA 1	ncRNA
chr3	57024612	57025007	126	NA	intron (NM_001128615, intron 2 of 12)	MIR|SINE|MIR	50741	NR_046572	100874200	Hs.549631	NR_046572	ENSG00000240198	ARHGEF3-AS1	RP11-51O17.1	ARHGEF3 antisense RNA 1	ncRNA
chr6	156938426	156938797	186	NA	Intergenic	Intergenic	-160453	NM_017519	57492	Hs.744461	XM_005267069	ENSG00000049618	ARID1B	6A3-5|BAF250B|BRIGHT|DAN15|ELD/OSA1|MRD12|OSA2|P250R	AT rich interactive domain 1B (SWI1-like)	protein-coding
chr19	952610	953049	149	NA	intron (NM_005224, intron 3 of 8)	intron (NM_005224, intron 3 of 8)	26792	NM_005224	1820	Hs.501296	XM_005259512		ARID3A	BRIGHT|DRIL1|DRIL3|E2FBP1	AT rich interactive domain 3A (BRIGHT-like)	protein-coding
chr2	97222325	97222983	879	NA	Intergenic	Intergenic	20190	NM_212481	10865	Hs.920	XM_005263856	ENSG00000196843	ARID5A	MRF-1|MRF1|RP11-363D14	AT rich interactive domain 5A (MRF1-like)	protein-coding
chr10	63797561	63798042	456	NA	intron (NM_032199, intron 4 of 9)	intron (NM_032199, intron 4 of 9)	-11169	NM_001244638	84159	Hs.535297	XM_005270215	ENSG00000150347	ARID5B	DESRT|MRF-2|MRF2	AT rich interactive domain 5B (MRF1-like)	protein-coding
chr3	160396352	160396743	185	NA	TTS (NM_025047)	TTS (NM_025047)	1599	NM_025047	80117	Hs.287702	NM_025047	ENSG00000179674	ARL14	ARF7	ADP-ribosylation factor-like 14	protein-coding
chr3	160385223	160385552	152	NA	Intergenic	Intergenic	-9561	NM_025047	80117	Hs.287702	NM_025047	ENSG00000179674	ARL14	ARF7	ADP-ribosylation factor-like 14	protein-coding
chr7	12840683	12841463	3693	NA	Intergenic	Intergenic	114162	NM_005738	10124	Hs.245540	NM_001037164	ENSG00000122644	ARL4A	ARL4	ADP-ribosylation factor-like 4A	protein-coding
chr7	13056622	13057372	403	NA	Intergenic	Intergenic	330086	NM_005738	10124	Hs.245540	NM_001037164	ENSG00000122644	ARL4A	ARL4	ADP-ribosylation factor-like 4A	protein-coding
chr7	13056622	13057372	295	NA	Intergenic	Intergenic	330086	NM_005738	10124	Hs.245540	NM_001037164	ENSG00000122644	ARL4A	ARL4	ADP-ribosylation factor-like 4A	protein-coding
chr7	12841676	12842206	190	NA	Intergenic	Intergenic	115030	NM_005738	10124	Hs.245540	NM_001037164	ENSG00000122644	ARL4A	ARL4	ADP-ribosylation factor-like 4A	protein-coding
chr7	12726120	12726403	133	NA	promoter-TSS (NM_001195396)	promoter-TSS (NM_001195396)	-191	NM_001037164	10124	Hs.245540	NM_001037164	ENSG00000122644	ARL4A	ARL4	ADP-ribosylation factor-like 4A	protein-coding
chr2	235271594	235271901	379	NA	Intergenic	Intergenic	133946	NM_005737	10123	Hs.730678	XM_005246055	ENSG00000188042	ARL4C	ARL7|LAK	ADP-ribosylation factor-like 4C	protein-coding
chr2	235330932	235331272	138	NA	Intergenic	Helitron1Nb_Mam|RC|Helitron	74591	NM_005737	10123	Hs.730678	XM_005246055	ENSG00000188042	ARL4C	ARL7|LAK	ADP-ribosylation factor-like 4C	protein-coding
chr2	235603206	235603773	29	NA	Intergenic	Intergenic	-197792	NM_001282431	10123	Hs.730678	XM_005246055	ENSG00000188042	ARL4C	ARL7|LAK	ADP-ribosylation factor-like 4C	protein-coding
chr10	18949106	18949457	101	NA	intron (NM_178815, intron 1 of 5)	intron (NM_178815, intron 1 of 5)	968	NM_178815	221079	Hs.594569	XM_005252400	ENSG00000165997	ARL5B	ARL8	ADP-ribosylation factor-like 5B	protein-coding
chr8	66547747	66548073	100	NA	Intergenic	Intergenic	-1458	NM_018120	55156	Hs.269542	XM_005251263	ENSG00000104442	ARMC1	Arcp	armadillo repeat containing 1	protein-coding
chr10	23111941	23112309	219	NA	Intergenic	MIRb|SINE|MIR	-104828	NM_001282746	219681	Hs.722481	XM_005252379	ENSG00000165309	ARMC3	CT81|KU-CT-1	armadillo repeat containing 3	protein-coding
chr11	13354788	13355618	777	NA	intron (NM_001178, intron 3 of 19)	L3|LINE|CR1	55878	NM_001178	406	Hs.65734	XM_005252928	ENSG00000133794	ARNTL	BMAL1|BMAL1c|JAP3|MOP3|PASD3|TIC|bHLHe5	aryl hydrocarbon receptor nuclear translocator-like	protein-coding
chr11	13354788	13355618	719	NA	intron (NM_001178, intron 3 of 19)	L3|LINE|CR1	55878	NM_001178	406	Hs.65734	XM_005252928	ENSG00000133794	ARNTL	BMAL1|BMAL1c|JAP3|MOP3|PASD3|TIC|bHLHe5	aryl hydrocarbon receptor nuclear translocator-like	protein-coding
chr7	98973781	98974178	95	NA	intron (NM_005720, intron 1 of 9)	MIRb|SINE|MIR	1681	NM_005720	10095	Hs.489284	XM_005250097	ENSG00000130429	ARPC1B	ARC41|p40-ARC|p41-ARC	actin related protein 2/3 complex, subunit 1B, 41kDa	protein-coding
chr11	75083059	75083580	184	NA	Intergenic	MIR|SINE|MIR	-20444	NM_004041	408	Hs.625320	XM_005273997	ENSG00000137486	ARRB1	ARB1|ARR1	arrestin, beta 1	protein-coding
chr5	91688785	91689293	315	NA	Intergenic	Intergenic	-1009890	NM_020801	57561	Hs.24684	NM_020801	ENSG00000113369	ARRDC3	TLIMP	arrestin domain containing 3	protein-coding
chr15	98491175	98491405	35	NA	Intergenic	Intergenic	-12643	NM_183376	91947	Hs.6093	NM_183376	ENSG00000140450	ARRDC4	-	arrestin domain containing 4	protein-coding
chrX	25542345	25542562	126	NA	Intergenic	Intergenic	-508388	NM_139058	170302	Hs.300304	NM_139058	ENSG00000004848	ARX	CT121|EIEE1|ISSX|MRX29|MRX32|MRX33|MRX36|MRX38|MRX43|MRX54|MRX76|MRX87|MRXS1|PRTS	aristaless related homeobox	protein-coding
chr8	17942299	17942636	188	NA	promoter-TSS (NM_177924)	promoter-TSS (NM_177924)	40	NM_001127505	427	Hs.633993	XM_005273504	ENSG00000104763	ASAH1	AC|ACDase|ASAH|PHP|PHP32|SMAPME	N-acylsphingosine amidohydrolase (acid ceramidase) 1	protein-coding
chr10	52153595	52153935	65	NA	intron (NM_147156, intron 6 of 10)	intron (NM_147156, intron 6 of 10)	-145395	NM_019893	56624	Hs.512645	NM_001143974	ENSG00000188611	ASAH2	BCDase|HNAC1|LCDase|N-CDase|NCDase	N-acylsphingosine amidohydrolase (non-lysosomal ceramidase) 2	protein-coding
chr8	131624291	131624541	93	NA	Intergenic	MLT2B4|LTR|ERVL	-168510	NM_018482	50807	Hs.655552	XM_005250925	ENSG00000153317	ASAP1	AMAP1|CENTB4|DDEF1|PAG2|PAP|ZG14P	ArfGAP with SH3 domain, ankyrin repeat and PH domain 1	protein-coding
chr8	131495523	131495815	60	NA	Intergenic	Intergenic	-39763	NM_018482	50807	Hs.655552	XM_005250925	ENSG00000153317	ASAP1	AMAP1|CENTB4|DDEF1|PAG2|PAP|ZG14P	ArfGAP with SH3 domain, ankyrin repeat and PH domain 1	protein-coding
chr2	9349942	9350571	1103	NA	intron (NM_003887, intron 1 of 27)	MIRb|SINE|MIR	3362	NM_003887	8853	Hs.555902	XM_005246181	ENSG00000151693	ASAP2	AMAP2|CENTB3|DDEF2|PAG3|PAP|Pap-alpha|SHAG1	ArfGAP with SH3 domain, ankyrin repeat and PH domain 2	protein-coding
chr2	9277059	9278141	459	NA	Intergenic	Intergenic	-69294	NM_001135191	8853	Hs.555902	XM_005246181	ENSG00000151693	ASAP2	AMAP2|CENTB3|DDEF2|PAG3|PAP|Pap-alpha|SHAG1	ArfGAP with SH3 domain, ankyrin repeat and PH domain 2	protein-coding
chr2	9277059	9278141	128	NA	Intergenic	Intergenic	-69294	NM_001135191	8853	Hs.555902	XM_005246181	ENSG00000151693	ASAP2	AMAP2|CENTB3|DDEF2|PAG3|PAP|Pap-alpha|SHAG1	ArfGAP with SH3 domain, ankyrin repeat and PH domain 2	protein-coding
chr10	5651986	5653055	1113	NA	Intergenic	(GAAA)n|Simple_repeat|Simple_repeat	56038	NR_037164	79754	Hs.445899	NM_024701	ENSG00000196372	ASB13	-	ankyrin repeat and SOCS box containing 13	protein-coding
chr15	101262114	101262804	322	NA	Intergenic	Intergenic	119704	NM_198243	140460	Hs.709044	NM_024708	ENSG00000183475	ASB7	-	ankyrin repeat and SOCS box containing 7	protein-coding
chr15	101262114	101262804	100	NA	Intergenic	Intergenic	119704	NM_198243	140460	Hs.709044	NM_024708	ENSG00000183475	ASB7	-	ankyrin repeat and SOCS box containing 7	protein-coding
chr15	101142775	101143048	55	NA	promoter-TSS (NM_001040616)	promoter-TSS (NM_001040616)	156	NM_198243	140460	Hs.709044	NM_024708	ENSG00000183475	ASB7	-	ankyrin repeat and SOCS box containing 7	protein-coding
chr22	30217213	30217600	45	NA	intron (NM_001242906, intron 4 of 18)	MIRb|SINE|MIR	16887	NM_001242906	84164	Hs.731754	XM_005261775	ENSG00000100325	ASCC2	ASC1p100|p100	activating signal cointegrator 1 complex subunit 2	protein-coding
chr6	101352245	101352490	119	NA	Intergenic	MLT2B3|LTR|ERVL	-23119	NM_022091	10973	Hs.733060	XM_005266803	ENSG00000112249	ASCC3	ASC1p200|HELIC1|RNAH	activating signal cointegrator 1 complex subunit 3	protein-coding
chr12	103487402	103487937	226	NA	Intergenic	Intergenic	136217	NM_004316	429	Hs.703025	NM_004316	ENSG00000139352	ASCL1	ASH1|HASH1|MASH1|bHLHa46	achaete-scute family bHLH transcription factor 1	protein-coding
chr7	65541782	65542103	183	NA	intron (NM_001024944, intron 1 of 14)	intron (NM_001024944, intron 1 of 14)	1108	NM_001024946	435	Hs.632015	XM_005250360	ENSG00000126522	ASL	ASAL	argininosuccinate lyase	protein-coding
chr8	62408764	62409041	163	NA	intron (NM_173519, intron 5 of 5)	intron (NM_173519, intron 5 of 5)	193506	NM_001164752	444	Hs.332422	XM_005251235	ENSG00000198363	ASPH	AAH|BAH|CASQ2BP1|HAAH|JCTN|junctin	aspartate beta-hydroxylase	protein-coding
chr2	70237071	70237749	122	NA	intron (NR_033872, intron 7 of 10)	intron (NR_033872, intron 7 of 10)	-48013	NM_152792	151516	Hs.516253	NM_152792	ENSG00000244617	ASPRV1	MUNO|SASP|SASPase|Taps	aspartic peptidase, retroviral-like 1	protein-coding
chr9	133325690	133326264	1079	NA	intron (NM_000050, intron 2 of 15)	intron (NM_000050, intron 2 of 15)	5883	NM_000050	445	Hs.160786	XM_005272199	ENSG00000130707	ASS1	ASS|CTLN1	argininosuccinate synthase 1	protein-coding
chr9	133375011	133375758	580	NA	intron (NM_054012, intron 14 of 14)	intron (NM_054012, intron 14 of 14)	55290	NM_000050	445	Hs.160786	XM_005272199	ENSG00000130707	ASS1	ASS|CTLN1	argininosuccinate synthase 1	protein-coding
chr9	133327117	133327404	23	NA	intron (NM_000050, intron 2 of 15)	intron (NM_000050, intron 2 of 15)	7166	NM_000050	445	Hs.160786	XM_005272199	ENSG00000130707	ASS1	ASS|CTLN1	argininosuccinate synthase 1	protein-coding
chr2	24011857	24012488	838	NA	intron (NM_017552, intron 19 of 27)	L2c|LINE|L2	137764	NM_017552	54454	Hs.467862	XM_005264372	ENSG00000119778	ATAD2B	-	ATPase family, AAA domain containing 2B	protein-coding
chr6	30594340	30594655	245	NA	promoter-TSS (NM_001254952)	promoter-TSS (NM_001254952)	-116	NM_024909	79969	Hs.654798	XM_005249414	ENSG00000137343	ATAT1	C6orf134|MEC17|Nbla00487|TAT	alpha tubulin acetyltransferase 1	protein-coding
chr10	123695274	123695759	183	NA	Intergenic	LTR22A|LTR|ERVK	-7200	NM_001288736	11101	Hs.632080	XM_005269456	ENSG00000107669	ATE1	-	arginyltransferase 1	protein-coding
chr12	14364688	14365111	252	NA	Intergenic	Intergenic	-153667	NM_018179	55729	Hs.591151	XM_005253423	ENSG00000171681	ATF7IP	AM|ATF-IP|MCAF|MCAF1|p621	activating transcription factor 7 interacting protein	protein-coding
chr12	14509211	14509699	149	NA	Intergenic	AluSp|SINE|Alu	-9111	NM_018179	55729	Hs.591151	XM_005253423	ENSG00000171681	ATF7IP	AM|ATF-IP|MCAF|MCAF1|p621	activating transcription factor 7 interacting protein	protein-coding
chr12	14360979	14361319	76	NA	Intergenic	Intergenic	-157417	NM_018179	55729	Hs.591151	XM_005253423	ENSG00000171681	ATF7IP	AM|ATF-IP|MCAF|MCAF1|p621	activating transcription factor 7 interacting protein	protein-coding
chr12	14393225	14393449	40	NA	Intergenic	Intergenic	-125229	NM_018179	55729	Hs.591151	XM_005253423	ENSG00000171681	ATF7IP	AM|ATF-IP|MCAF|MCAF1|p621	activating transcription factor 7 interacting protein	protein-coding
chr16	10394841	10395163	182	NA	Intergenic	MLT1J|LTR|ERVL-MaLR	-84910	NM_001256160	80063	Hs.742019	NM_001256160	ENSG00000166669	ATF7IP2	MCAF2	activating transcription factor 7 interacting protein 2	protein-coding
chr11	46661674	46661949	165	NA	intron (NM_014741, intron 2 of 16)	LTR26B|LTR|ERV1	22985	NM_001142673	9776	Hs.127403	XM_005253262	ENSG00000175224	ATG13	KIAA0652|PARATARG8	autophagy related 13	protein-coding
chr2	234155848	234156696	110	NA	Intergenic	Intergenic	-3945	NM_001190266	55054	Hs.529322	XM_005246082	ENSG00000085978	ATG16L1	APG16L|ATG16A|ATG16L|IBD10|WDR30	autophagy related 16-like 1 (S. cerevisiae)	protein-coding
chr2	234155848	234156696	71	NA	Intergenic	Intergenic	-3945	NM_001190266	55054	Hs.529322	XM_005246082	ENSG00000085978	ATG16L1	APG16L|ATG16A|ATG16L|IBD10|WDR30	autophagy related 16-like 1 (S. cerevisiae)	protein-coding
chr2	234162134	234162413	48	NA	intron (NM_198890, intron 1 of 13)	AluSx|SINE|Alu	2056	NM_030803	55054	Hs.529322	XM_005246082	ENSG00000085978	ATG16L1	APG16L|ATG16A|ATG16L|IBD10|WDR30	autophagy related 16-like 1 (S. cerevisiae)	protein-coding
chr2	234155848	234156696	36	NA	Intergenic	Intergenic	-3945	NM_001190266	55054	Hs.529322	XM_005246082	ENSG00000085978	ATG16L1	APG16L|ATG16A|ATG16L|IBD10|WDR30	autophagy related 16-like 1 (S. cerevisiae)	protein-coding
chr11	72537092	72537504	41	NA	intron (NM_033388, intron 11 of 17)	intron (NM_033388, intron 11 of 17)	11847	NM_033388	89849	Hs.653186	XM_005274376	ENSG00000168010	ATG16L2	ATG16B|WDR80	autophagy related 16-like 2 (S. cerevisiae)	protein-coding
chr7	150709377	150709877	175	NA	non-coding (NR_073169, exon 18 of 18)	non-coding (NR_073169, exon 18 of 18)	11959	NR_073169	285973	Hs.716846	NM_173681	ENSG00000181652	ATG9B	APG9L2|NOS3AS|SONE	autophagy related 9B	protein-coding
chr14	50999661	51000126	243	NA	promoter-TSS (NM_001127713)	promoter-TSS (NM_001127713)	93	NM_001127713	51062	Hs.584905	NM_001127713	ENSG00000198513	ATL1	AD-FSP|FSP1|GBP3|HSN1D|SPG3|SPG3A|atlastin1	atlastin GTPase 1	protein-coding
chr2	38511932	38512732	1675	NA	Intergenic	MER4B|LTR|ERV1	92100	NM_022374	64225	Hs.727652	NM_001135673	ENSG00000119787	ATL2	ARL3IP2|ARL6IP2|atlastin2	atlastin GTPase 2	protein-coding
chr2	38517502	38517859	152	NA	Intergenic	MIRb|SINE|MIR	86752	NM_022374	64225	Hs.727652	NM_001135673	ENSG00000119787	ATL2	ARL3IP2|ARL6IP2|atlastin2	atlastin GTPase 2	protein-coding
chr2	38634373	38634674	132	NA	Intergenic	Intergenic	-30091	NR_024191	64225	Hs.727652	NM_001135673	ENSG00000119787	ATL2	ARL3IP2|ARL6IP2|atlastin2	atlastin GTPase 2	protein-coding
chr4	94773818	94774051	58	NA	Intergenic	Intergenic	23856	NM_005172	474	Hs.532680	NM_005172	ENSG00000172238	ATOH1	ATH1|HATH1|MATH-1|bHLHa14	atonal homolog 1 (Drosophila)	protein-coding
chr5	160126174	160126633	167	NA	intron (NM_025153, intron 3 of 25)	intron (NM_025153, intron 3 of 25)	152816	NM_025153	23120	Hs.109358	XM_005265848	ENSG00000118322	ATP10B	ATPVB	ATPase, class V, type 10B	protein-coding
chr13	113369122	113369571	355	NA	intron (NM_015205, intron 1 of 29)	L1MB3|LINE|L1	24703	NM_032189	23250	Hs.29189	XM_005268299	ENSG00000068650	ATP11A	ATPIH|ATPIS	ATPase, class VI, type 11A	protein-coding
chr3	182478153	182478901	298	NA	Intergenic	Intergenic	-32764	NM_014616	23200	Hs.478429	XM_005247241	ENSG00000058063	ATP11B	ATPIF|ATPIR	ATPase, class VI, type 11B	protein-coding
chr3	182478153	182478901	230	NA	Intergenic	Intergenic	-32764	NM_014616	23200	Hs.478429	XM_005247241	ENSG00000058063	ATP11B	ATPIF|ATPIR	ATPase, class VI, type 11B	protein-coding
chr1	116936497	116936855	135	NA	intron (NM_001160233, intron 12 of 22)	intron (NM_001160233, intron 12 of 22)	10684	NM_001160234	476	Hs.371889	XM_005270890	ENSG00000163399	ATP1A1	-	ATPase, Na+/K+ transporting, alpha 1 polypeptide	protein-coding
chr1	117014903	117015383	281	NA	Intergenic	Intergenic	-53899	NR_027646	84852	Hs.664752	NR_024124	ENSG00000203865	ATP1A1OS	C1orf203	ATP1A1 opposite strand	ncRNA
chr1	117017942	117018309	221	NA	Intergenic	Intergenic	-56881	NR_027646	84852	Hs.664752	NR_024124	ENSG00000203865	ATP1A1OS	C1orf203	ATP1A1 opposite strand	ncRNA
chr1	169117696	169118134	549	NA	intron (NM_013330, intron 11 of 11)	intron (NM_013330, intron 11 of 11)	41968	NM_001677	481	Hs.291196	XM_005245213	ENSG00000143153	ATP1B1	ATP1B	ATPase, Na+/K+ transporting, beta 1 polypeptide	protein-coding
chr1	169074871	169075255	165	NA	promoter-TSS (NM_001677)	promoter-TSS (NM_001677)	-884	NM_001677	481	Hs.291196	XM_005245213	ENSG00000143153	ATP1B1	ATP1B	ATPase, Na+/K+ transporting, beta 1 polypeptide	protein-coding
chr12	110684999	110685789	390	NA	Intergenic	Intergenic	-33638	NM_001681	488	Hs.506759	XM_005253887	ENSG00000174437	ATP2A2	ATP2B|DAR|DD|SERCA2	ATPase, Ca++ transporting, cardiac muscle, slow twitch 2	protein-coding
chr12	110684999	110685789	104	NA	Intergenic	Intergenic	-33638	NM_001681	488	Hs.506759	XM_005253887	ENSG00000174437	ATP2A2	ATP2B|DAR|DD|SERCA2	ATPase, Ca++ transporting, cardiac muscle, slow twitch 2	protein-coding
chr17	3907023	3907447	275	NA	TTS (NM_015113)	TTS (NM_015113)	-39477	NM_174954	489	Hs.513870	XM_005256656	ENSG00000074370	ATP2A3	SERCA3	ATPase, Ca++ transporting, ubiquitous	protein-coding
chr12	90026561	90027049	541	NA	intron (NM_001001323, intron 4 of 20)	intron (NM_001001323, intron 4 of 20)	23039	NM_001682	490	Hs.506276	XM_005268918	ENSG00000070961	ATP2B1	PMCA1|PMCA1kb	ATPase, Ca++ transporting, plasma membrane 1	protein-coding
chr16	84456923	84457378	228	NA	intron (NM_001286527, intron 10 of 27)	MLT1J2|LTR|ERVL-MaLR	55017	NM_001286527	9914	Hs.6168	XM_005256270	ENSG00000064270	ATP2C2	SPCA2	ATPase, Ca++ transporting, type 2C, member 2	protein-coding
chr13	28527086	28527529	220	NA	Intergenic	Intergenic	7964	NR_002162	432369	Hs.574118	NR_002162	ENSG00000180389	ATP5EP2	-	ATP synthase, H+ transporting, mitochondrial F1 complex, epsilon subunit pseudogene 2	pseudo
chr13	28530748	28531261	52	NA	Intergenic	Intergenic	11661	NR_002162	432369	Hs.574118	NR_002162	ENSG00000180389	ATP5EP2	-	ATP synthase, H+ transporting, mitochondrial F1 complex, epsilon subunit pseudogene 2	pseudo
chr17	46948696	46949515	2356	NA	Intergenic	Intergenic	-21043	NM_001002027	516	Hs.80986	NM_001002027	ENSG00000159199	ATP5G1	ATP5A|ATP5G	ATP synthase, H+ transporting, mitochondrial Fo complex, subunit C1 (subunit 9)	protein-coding
chr5	81683041	81683374	34	NA	Intergenic	Intergenic	82041	NM_001017971	92270	Hs.729805	NM_001017971	ENSG00000205464	ATP6AP1L	-	ATPase, H+ transporting, lysosomal accessory protein 1-like	protein-coding
chr17	40636386	40636748	556	NA	intron (NM_001130020, intron 9 of 20)	intron (NM_001130020, intron 9 of 20)	25705	NM_001130020	535	Hs.463074	XM_005257459	ENSG00000033627	ATP6V0A1	ATP6N1|ATP6N1A|Stv1|VPP1|Vph1|a1	ATPase, H+ transporting, lysosomal V0 subunit a1	protein-coding
chr17	40615978	40616203	120	NA	intron (NM_001130020, intron 2 of 20)	Tigger2a|DNA|TcMar-Tigger	5228	NM_001130020	535	Hs.463074	XM_005257459	ENSG00000033627	ATP6V0A1	ATP6N1|ATP6N1A|Stv1|VPP1|Vph1|a1	ATPase, H+ transporting, lysosomal V0 subunit a1	protein-coding
chr16	67495759	67496531	463	NA	intron (NM_004691, intron 1 of 7)	intron (NM_004691, intron 1 of 7)	18944	NM_004691	9114	Hs.106876	XM_005256231	ENSG00000159720	ATP6V0D1	ATP6D|ATP6DV|P39|VATX|VMA6|VPATPD	ATPase, H+ transporting, lysosomal 38kDa, V0 subunit d1	protein-coding
chr8	87140456	87141030	635	NA	intron (NM_152565, intron 2 of 7)	intron (NM_152565, intron 2 of 7)	29604	NM_152565	245972	Hs.436360	NM_152565	ENSG00000147614	ATP6V0D2	ATP6D2|VMA6	ATPase, H+ transporting, lysosomal 38kDa, V0 subunit d2	protein-coding
chr2	10892446	10892806	181	NA	intron (NM_001039362, intron 3 of 13)	intron (NM_001039362, intron 3 of 13)	30851	NM_144583	245973	Hs.580464	NM_001039362	ENSG00000143882	ATP6V1C2	ATP6C2|VMA5	ATPase, H+ transporting, lysosomal 42kDa, V1 subunit C2	protein-coding
chr8	54691314	54691778	146	NA	intron (NM_213620, intron 9 of 13)	L1MEf|LINE|L1	64056	NM_213620	51606	Hs.491737	XM_005251257	ENSG00000047249	ATP6V1H	MSTP042|NBP1|SFD|SFDalpha|SFDbeta|VMA13	ATPase, H+ transporting, lysosomal 50/57kDa, V1 subunit H	protein-coding
chr8	54647459	54647866	146	NA	intron (NM_213620, intron 13 of 13)	HERVE_a-int|LTR|ERV1	107940	NM_213620	51606	Hs.491737	XM_005251257	ENSG00000047249	ATP6V1H	MSTP042|NBP1|SFD|SFDalpha|SFDbeta|VMA13	ATPase, H+ transporting, lysosomal 50/57kDa, V1 subunit H	protein-coding
chr18	55464538	55464900	60	NA	intron (NM_005603, intron 1 of 27)	intron (NM_005603, intron 1 of 27)	5608	NM_005603	5205	Hs.216623	NM_005603	ENSG00000081923	ATP8B1	ATPIC|BRIC|FIC1|ICP1|PFIC|PFIC1	ATPase, aminophospholipid transporter, class I, type 8B, member 1	protein-coding
chr20	50361234	50361501	128	NA	intron (NM_006045, intron 1 of 27)	intron (NM_006045, intron 1 of 27)	23541	NM_006045	10079	Hs.649234	NM_006045	ENSG00000054793	ATP9A	ATPIIA	ATPase, class II, type 9A	protein-coding
chr20	50378291	50378514	101	NA	intron (NM_006045, intron 1 of 27)	MLT1D|LTR|ERVL-MaLR	6506	NM_006045	10079	Hs.649234	NM_006045	ENSG00000054793	ATP9A	ATPIIA	ATPase, class II, type 9A	protein-coding
chr18	76916750	76917131	151	NA	intron (NM_198531, intron 7 of 29)	intron (NM_198531, intron 7 of 29)	87543	NM_198531	374868	Hs.465475	XM_005266690	ENSG00000166377	ATP9B	ATPASEP|ATPIIB|NEO1L|hMMR1	ATPase, class II, type 9B	protein-coding
chr3	63897656	63898307	1133	NA	intron (NM_000333, intron 2 of 12)	CpG	13906	NM_001177387	6314	Hs.476595	XM_005265365	ENSG00000163635	ATXN7	ADCAII|OPCA3|SCA7	ataxin 7	protein-coding
chr7	105517408	105518264	411	NA	promoter-TSS (NM_020725)	promoter-TSS (NM_020725)	-805	NM_152749	222255	Hs.745056	XM_005250219	ENSG00000146776	ATXN7L1	ATXN7L4	ataxin 7-like 1	protein-coding
chr7	105451711	105451939	32	NA	intron (NM_152749, intron 2 of 3)	MLT1C|LTR|ERVL-MaLR	65206	NM_020725	222255	Hs.745056	XM_005250219	ENSG00000146776	ATXN7L1	ATXN7L4	ataxin 7-like 1	protein-coding
chr13	70294494	70294995	209	NA	intron (NM_001286725, intron 7 of 9)	L2a|LINE|L2	-386601	NR_002717	6315	Hs.676453	NR_002717		ATXN8OS	KLHL1AS|NCRNA00003|SCA8	ATXN8 opposite strand (non-protein coding)	ncRNA
chr13	70509224	70509463	186	NA	intron (NM_001286725, intron 3 of 9)	intron (NM_001286725, intron 3 of 9)	-172002	NR_002717	6315	Hs.676453	NR_002717		ATXN8OS	KLHL1AS|NCRNA00003|SCA8	ATXN8 opposite strand (non-protein coding)	ncRNA
chr7	69673565	69674108	633	NA	intron (NM_001127231, intron 4 of 17)	L2a|LINE|L2	609930	NM_015570	26053	Hs.712991	XM_005250257	ENSG00000158321	AUTS2	FBRSL2	autism susceptibility candidate 2	protein-coding
chr10	99424137	99424601	167	NA	intron (NM_018425, intron 5 of 8)	intron (NM_018425, intron 5 of 8)	22646	NM_021732	60370	Hs.23918	NM_021732	ENSG00000119986	AVPI1	PP5395|RP11-548K23.7|VIP32|VIT32	arginine vasopressin-induced 1	protein-coding
chr12	63476854	63477185	40	NA	Intergenic	Intergenic	69571	NM_000706	552	Hs.2131	XM_005269002		AVPR1A	AVPR V1a|AVPR1|V1aR	arginine vasopressin receptor 1A	protein-coding
chr17	63543250	63543800	1287	NA	intron (NM_004655, intron 3 of 10)	intron (NM_004655, intron 3 of 10)	14215	NM_004655	8313	Hs.156527	XM_005257716	ENSG00000168646	AXIN2	AXIL|ODCRCS	axin 2	protein-coding
chr17	63584276	63584836	297	NA	Intergenic	Intergenic	-26816	NM_004655	8313	Hs.156527	XM_005257716	ENSG00000168646	AXIN2	AXIL|ODCRCS	axin 2	protein-coding
chr17	63607623	63608240	230	NA	Intergenic	L2c|LINE|L2	-50191	NM_004655	8313	Hs.156527	XM_005257716	ENSG00000168646	AXIN2	AXIL|ODCRCS	axin 2	protein-coding
chr19	41732197	41732524	157	NA	promoter-TSS (NM_001278599)	promoter-TSS (NM_001278599)	-300	NM_001278599	558	Hs.590970	NM_001278599	ENSG00000167601	AXL	JTK11|UFO	AXL receptor tyrosine kinase	protein-coding
chr7	99553025	99553463	423	NA	Intergenic	Intergenic	20491	NM_001185	563	Hs.546239	NM_001185	ENSG00000160862	AZGP1	ZA2G|ZAG	alpha-2-glycoprotein 1, zinc-binding	protein-coding
chr8	103820453	103821025	512	NA	Intergenic	Intergenic	55658	NM_148174	51582	Hs.459106	XM_005250967	ENSG00000155096	AZIN1	OAZI|OAZIN|ODC1L	antizyme inhibitor 1	protein-coding
chr8	103818329	103818904	83	NA	Intergenic	Intergenic	57781	NM_148174	51582	Hs.459106	XM_005250967	ENSG00000155096	AZIN1	OAZI|OAZIN|ODC1L	antizyme inhibitor 1	protein-coding
chr8	103818329	103818904	63	NA	Intergenic	Intergenic	57781	NM_148174	51582	Hs.459106	XM_005250967	ENSG00000155096	AZIN1	OAZI|OAZIN|ODC1L	antizyme inhibitor 1	protein-coding
chr2	168671873	168672275	182	NA	Intergenic	Intergenic	-3108	NM_020981	8708	Hs.735833	XM_005246931	ENSG00000172318	B3GALT1	beta3Gal-T1	UDP-Gal:betaGlcNAc beta 1,3-galactosyltransferase, polypeptide 1	protein-coding
chr1	193324191	193324949	1996	NA	Intergenic	Intergenic	-168827	NM_003783	8707	Hs.518834	NM_003783	ENSG00000162630	B3GALT2	BETA3GALT2|GLCT2|beta3Gal-T2	UDP-Gal:betaGlcNAc beta 1,3-galactosyltransferase, polypeptide 2	protein-coding
chr1	194233720	194234172	181	NA	Intergenic	THE1A-int|LTR|ERVL-MaLR	-1078203	NM_003783	8707	Hs.518834	NM_003783	ENSG00000162630	B3GALT2	BETA3GALT2|GLCT2|beta3Gal-T2	UDP-Gal:betaGlcNAc beta 1,3-galactosyltransferase, polypeptide 2	protein-coding
chr1	193553995	193554236	84	NA	Intergenic	Intergenic	-398372	NM_003783	8707	Hs.518834	NM_003783	ENSG00000162630	B3GALT2	BETA3GALT2|GLCT2|beta3Gal-T2	UDP-Gal:betaGlcNAc beta 1,3-galactosyltransferase, polypeptide 2	protein-coding
chr1	194743649	194743878	70	NA	Intergenic	Intergenic	-1588020	NM_003783	8707	Hs.518834	NM_003783	ENSG00000162630	B3GALT2	BETA3GALT2|GLCT2|beta3Gal-T2	UDP-Gal:betaGlcNAc beta 1,3-galactosyltransferase, polypeptide 2	protein-coding
chr11	66118604	66119209	1228	NA	Intergenic	L1MB4|LINE|L1	-3745	NM_006876	11041	Hs.8526	NM_006876	ENSG00000174684	B3GNT1	B3GN-T1|B3GNT6|BETA3GNTI|MDDGA13|iGAT|iGNT	UDP-GlcNAc:betaGal beta-1,3-N-acetylglucosaminyltransferase 1	protein-coding
chr19	17908155	17908724	1003	NA	intron (NM_014256, intron 1 of 2)	intron (NM_014256, intron 1 of 2)	2520	NM_014256	10331	Hs.657825	NM_014256	ENSG00000179913	B3GNT3	B3GAL-T8|B3GN-T3|B3GNT-3|HP10328|TMEM3|beta3Gn-T3	UDP-GlcNAc:betaGal beta-1,3-N-acetylglucosaminyltransferase 3	protein-coding
chr19	17907165	17907724	240	NA	intron (NM_014256, intron 1 of 2)	intron (NM_014256, intron 1 of 2)	1525	NM_014256	10331	Hs.657825	NM_014256	ENSG00000179913	B3GNT3	B3GAL-T8|B3GN-T3|B3GNT-3|HP10328|TMEM3|beta3Gn-T3	UDP-GlcNAc:betaGal beta-1,3-N-acetylglucosaminyltransferase 3	protein-coding
chr3	182983785	182984413	1257	NA	intron (NM_032047, intron 1 of 1)	intron (NM_032047, intron 1 of 1)	13067	NM_032047	84002	Hs.718506	XM_005247823	ENSG00000176597	B3GNT5	B3GN-T5|beta3Gn-T5	UDP-GlcNAc:betaGal beta-1,3-N-acetylglucosaminyltransferase 5	protein-coding
chr3	182996190	182996636	388	NA	intron (NM_015078, intron 14 of 29)	L2c|LINE|L2	25381	NM_032047	84002	Hs.718506	XM_005247823	ENSG00000176597	B3GNT5	B3GN-T5|beta3Gn-T5	UDP-GlcNAc:betaGal beta-1,3-N-acetylglucosaminyltransferase 5	protein-coding
chr3	183025550	183025945	284	NA	intron (NM_015078, intron 10 of 29)	L2a|LINE|L2	54715	NM_032047	84002	Hs.718506	XM_005247823	ENSG00000176597	B3GNT5	B3GN-T5|beta3Gn-T5	UDP-GlcNAc:betaGal beta-1,3-N-acetylglucosaminyltransferase 5	protein-coding
chr3	182961984	182962309	280	NA	intron (NM_015078, intron 15 of 29)	MLT2B3|LTR|ERVL	-8886	NM_032047	84002	Hs.718506	XM_005247823	ENSG00000176597	B3GNT5	B3GN-T5|beta3Gn-T5	UDP-GlcNAc:betaGal beta-1,3-N-acetylglucosaminyltransferase 5	protein-coding
chr3	182962825	182963177	133	NA	intron (NM_015078, intron 15 of 29)	intron (NM_015078, intron 15 of 29)	-8031	NM_032047	84002	Hs.718506	XM_005247823	ENSG00000176597	B3GNT5	B3GN-T5|beta3Gn-T5	UDP-GlcNAc:betaGal beta-1,3-N-acetylglucosaminyltransferase 5	protein-coding
chr3	183024857	183025082	77	NA	intron (NM_015078, intron 10 of 29)	intron (NM_015078, intron 10 of 29)	53937	NM_032047	84002	Hs.718506	XM_005247823	ENSG00000176597	B3GNT5	B3GN-T5|beta3Gn-T5	UDP-GlcNAc:betaGal beta-1,3-N-acetylglucosaminyltransferase 5	protein-coding
chr3	182987979	182988337	47	NA	exon (NM_032047, exon 2 of 2)	exon (NM_032047, exon 2 of 2)	17126	NM_032047	84002	Hs.718506	XM_005247823	ENSG00000176597	B3GNT5	B3GN-T5|beta3Gn-T5	UDP-GlcNAc:betaGal beta-1,3-N-acetylglucosaminyltransferase 5	protein-coding
chr11	76674096	76674557	56	NA	intron (NM_018367, intron 3 of 10)	MER61F|LTR|ERV1	-71059	NM_138706	192134	Hs.352622	NM_138706	ENSG00000198488	B3GNT6	B3Gn-T6|BGnT-6|beta-1,3-Gn-T6|beta3Gn-T6	UDP-GlcNAc:betaGal beta-1,3-N-acetylglucosaminyltransferase 6 (core 3 synthase)	protein-coding
chr3	118958995	118959354	116	NA	intron (NM_212543, intron 1 of 8)	intron (NM_212543, intron 1 of 8)	578	NM_003778	8702	Hs.13225	XM_005247855	ENSG00000121578	B4GALT4	B4Gal-T4|beta4Gal-T4	UDP-Gal:betaGlcNAc beta 1,4- galactosyltransferase, polypeptide 4	protein-coding
chr20	48291140	48291547	234	NA	intron (NM_004776, intron 1 of 8)	intron (NM_004776, intron 1 of 8)	39078	NM_004776	9334	Hs.370487	NM_004776	ENSG00000158470	B4GALT5	B4Gal-T5|BETA4-GALT-IV|beta4Gal-T5|beta4GalT-V|gt-V	UDP-Gal:betaGlcNAc beta 1,4- galactosyltransferase, polypeptide 5	protein-coding
chr20	48307538	48307736	32	NA	intron (NM_004776, intron 1 of 8)	intron (NM_004776, intron 1 of 8)	22784	NM_004776	9334	Hs.370487	NM_004776	ENSG00000158470	B4GALT5	B4Gal-T5|BETA4-GALT-IV|beta4Gal-T5|beta4GalT-V|gt-V	UDP-Gal:betaGlcNAc beta 1,4- galactosyltransferase, polypeptide 5	protein-coding
chr17	19272233	19272674	292	NA	intron (NM_001243475, intron 1 of 6)	L2a|LINE|L2	-6407	NM_001243473	27077	Hs.462445	XM_005256605	ENSG00000108641	B9D1	B9|EPPB9|MKS9|MKSR1	B9 protein domain 1	protein-coding
chr9	104089547	104090277	2144	NA	Intergenic	MER11A|LTR|ERVK	55889	NM_001127610	570	Hs.284712	NM_001127610	ENSG00000136881	BAAT	BACAT|BAT	bile acid CoA: amino acid N-acyltransferase (glycine N-choloyltransferase)	protein-coding
chr9	104116673	104117258	803	NA	Intergenic	MLT1A0-int|LTR|ERVL-MaLR	28836	NM_001127610	570	Hs.284712	NM_001127610	ENSG00000136881	BAAT	BACAT|BAT	bile acid CoA: amino acid N-acyltransferase (glycine N-choloyltransferase)	protein-coding
chr9	104117524	104117949	59	NA	Intergenic	MLT1A0-int|LTR|ERVL-MaLR	28065	NM_001127610	570	Hs.284712	NM_001127610	ENSG00000136881	BAAT	BACAT|BAT	bile acid CoA: amino acid N-acyltransferase (glycine N-choloyltransferase)	protein-coding
chr17	79011232	79011915	76	NA	intron (NM_006340, intron 1 of 14)	intron (NM_006340, intron 1 of 14)	2626	NM_006340	10458	Hs.128316	XM_005256942	ENSG00000175866	BAIAP2	BAP2|FLAF3|IRSP53	BAI1-associated protein 2	protein-coding
chr7	98013663	98013983	167	NA	intron (NM_018842, intron 1 of 13)	intron (NM_018842, intron 1 of 13)	16604	NM_018842	55971	Hs.656063	XM_005250495	ENSG00000006453	BAIAP2L1	IRTKS	BAI1-associated protein 2-like 1	protein-coding
chr7	97983818	97984268	165	NA	intron (NM_018842, intron 3 of 13)	intron (NM_018842, intron 3 of 13)	46384	NM_018842	55971	Hs.656063	XM_005250495	ENSG00000006453	BAIAP2L1	IRTKS	BAI1-associated protein 2-like 1	protein-coding
chr7	97990000	97990386	81	NA	intron (NM_018842, intron 2 of 13)	intron (NM_018842, intron 2 of 13)	40234	NM_018842	55971	Hs.656063	XM_005250495	ENSG00000006453	BAIAP2L1	IRTKS	BAI1-associated protein 2-like 1	protein-coding
chr7	97990000	97990386	48	NA	intron (NM_018842, intron 2 of 13)	intron (NM_018842, intron 2 of 13)	40234	NM_018842	55971	Hs.656063	XM_005250495	ENSG00000006453	BAIAP2L1	IRTKS	BAI1-associated protein 2-like 1	protein-coding
chr22	38507360	38507977	574	NA	promoter-TSS (NM_025045)	promoter-TSS (NM_025045)	-992	NM_025045	80115	Hs.474822	XM_005261751	ENSG00000128298	BAIAP2L2	-	BAI1-associated protein 2-like 2	protein-coding
chr22	38503819	38504581	427	NA	intron (NM_025045, intron 3 of 13)	intron (NM_025045, intron 3 of 13)	2476	NM_025045	80115	Hs.474822	XM_005261751	ENSG00000128298	BAIAP2L2	-	BAI1-associated protein 2-like 2	protein-coding
chr22	38503819	38504581	50	NA	intron (NM_025045, intron 3 of 13)	intron (NM_025045, intron 3 of 13)	2476	NM_025045	80115	Hs.474822	XM_005261751	ENSG00000128298	BAIAP2L2	-	BAI1-associated protein 2-like 2	protein-coding
chr20	17804249	17804937	782	NA	Intergenic	Intergenic	124000	NM_001014977	140836	Hs.115366	XM_005260668	ENSG00000125888	BANF2	BAF-L|BAF2|BAFL|C20orf179	barrier to autointegration factor 2	protein-coding
chr20	17691321	17691994	301	NA	intron (NM_001014977, intron 1 of 2)	MER53|DNA|hAT	11064	NM_001014977	140836	Hs.115366	XM_005260668	ENSG00000125888	BANF2	BAF-L|BAF2|BAFL|C20orf179	barrier to autointegration factor 2	protein-coding
chr20	17680773	17681154	275	NA	intron (NM_001014977, intron 1 of 2)	intron (NM_001014977, intron 1 of 2)	370	NM_001014977	140836	Hs.115366	XM_005260668	ENSG00000125888	BANF2	BAF-L|BAF2|BAFL|C20orf179	barrier to autointegration factor 2	protein-coding
chr20	17702353	17703104	255	NA	intron (NM_001014977, intron 1 of 2)	MER20|DNA|hAT-Charlie	22135	NM_001014977	140836	Hs.115366	XM_005260668	ENSG00000125888	BANF2	BAF-L|BAF2|BAFL|C20orf179	barrier to autointegration factor 2	protein-coding
chr4	102695980	102696471	457	NA	Intergenic	Intergenic	-15539	NM_017935	55024	Hs.480400	NM_001083907	ENSG00000153064	BANK1	BANK	B-cell scaffold protein with ankyrin repeats 1	protein-coding
chr9	96656181	96656601	226	NA	Intergenic	Intergenic	61217	NM_021570	56033	Hs.164960	NM_021570	ENSG00000131668	BARX1	-	BARX homeobox 1	protein-coding
chr11	129185832	129186511	813	NA	Intergenic	Intergenic	-59710	NM_003658	8538	Hs.591944	XM_005271714	ENSG00000043039	BARX2	-	BARX homeobox 2	protein-coding
chr11	129297369	129297567	54	NA	intron (NM_003658, intron 1 of 3)	intron (NM_003658, intron 1 of 3)	51587	NM_003658	8538	Hs.591944	XM_005271714	ENSG00000043039	BARX2	-	BARX homeobox 2	protein-coding
chr11	129400378	129400671	53	NA	Intergenic	Intergenic	154643	NM_003658	8538	Hs.591944	XM_005271714	ENSG00000043039	BARX2	-	BARX homeobox 2	protein-coding
chr11	129256691	129257184	52	NA	intron (NM_003658, intron 1 of 3)	intron (NM_003658, intron 1 of 3)	11056	NM_003658	8538	Hs.591944	XM_005271714	ENSG00000043039	BARX2	-	BARX homeobox 2	protein-coding
chr13	23367921	23368292	158	NA	Intergenic	Intergenic	104214	NR_033774	646201	Hs.729338	NR_033774		BASP1P1	-	brain abundant, membrane attached signal protein 1 pseudogene 1	pseudo
chr14	76002155	76002643	82	NA	intron (NM_006399, intron 2 of 2)	L2a|LINE|L2	13615	NM_006399	10538	Hs.509964	NM_006399	ENSG00000156127	BATF	B-ATF|BATF1|SFA-2|SFA2	basic leucine zipper transcription factor, ATF-like	protein-coding
chr12	57029808	57030140	60	NA	5' UTR (NM_013449, exon 1 of 29)	5' UTR (NM_013449, exon 1 of 29)	189	NM_013449	11176	Hs.314263	XM_005268596	ENSG00000076108	BAZ2A	TIP5|WALp3	bromodomain adjacent to zinc finger domain, 2A	protein-coding
chr2	160363292	160363603	58	NA	intron (NM_013450, intron 2 of 36)	intron (NM_013450, intron 2 of 36)	109612	NM_013450	29994	Hs.470369	XM_005246488	ENSG00000123636	BAZ2B	WALp4	bromodomain adjacent to zinc finger domain, 2B	protein-coding
chr11	27076645	27077050	790	NA	intron (NM_003986, intron 2 of 8)	intron (NM_003986, intron 2 of 8)	14338	NM_003986	8424	Hs.591996	XM_005253159	ENSG00000129151	BBOX1	BBH|BBOX|G-BBH|gamma-BBH	butyrobetaine (gamma), 2-oxoglutarate dioxygenase (gamma-butyrobetaine hydroxylase) 1	protein-coding
chr11	27209523	27210022	146	NA	Intergenic	L2a|LINE|L2	147263	NM_003986	8424	Hs.591996	XM_005253159	ENSG00000129151	BBOX1	BBH|BBOX|G-BBH|gamma-BBH	butyrobetaine (gamma), 2-oxoglutarate dioxygenase (gamma-butyrobetaine hydroxylase) 1	protein-coding
chr16	75343740	75344329	388	NA	intron (NM_006324, intron 5 of 6)	intron (NM_006324, intron 5 of 6)	-42083	NM_001170715	9564	Hs.479747	XM_005256258	ENSG00000050820	BCAR1	CAS|CAS1|CASS1|CRKAS|P130Cas	breast cancer anti-estrogen resistance 1	protein-coding
chr16	75339178	75339749	301	NA	intron (NM_006324, intron 5 of 6)	MIR|SINE|MIR	-37512	NM_001170715	9564	Hs.479747	XM_005256258	ENSG00000050820	BCAR1	CAS|CAS1|CASS1|CRKAS|P130Cas	breast cancer anti-estrogen resistance 1	protein-coding
chr16	75340137	75340471	76	NA	intron (NM_006324, intron 5 of 6)	intron (NM_006324, intron 5 of 6)	-38353	NM_001170715	9564	Hs.479747	XM_005256258	ENSG00000050820	BCAR1	CAS|CAS1|CASS1|CRKAS|P130Cas	breast cancer anti-estrogen resistance 1	protein-coding
chr1	94083185	94083695	176	NA	intron (NM_001261408, intron 5 of 13)	intron (NM_001261408, intron 5 of 13)	-3738	NM_001261410	8412	Hs.36958	XM_005271251	ENSG00000137936	BCAR3	NSP2|SH2D3B	breast cancer anti-estrogen resistance 3	protein-coding
chr1	94137649	94137918	159	NA	intron (NM_001261408, intron 4 of 13)	intron (NM_001261408, intron 4 of 13)	9143	NM_001261409	8412	Hs.36958	XM_005271251	ENSG00000137936	BCAR3	NSP2|SH2D3B	breast cancer anti-estrogen resistance 3	protein-coding
chr1	94080072	94080477	76	NA	promoter-TSS (NM_001261410)	promoter-TSS (NM_001261410)	-572	NM_001261410	8412	Hs.36958	XM_005271251	ENSG00000137936	BCAR3	NSP2|SH2D3B	breast cancer anti-estrogen resistance 3	protein-coding
chr12	50261345	50261902	416	NA	3' UTR (NM_012306, exon 12 of 12)	3' UTR (NM_012306, exon 12 of 12)	-24711	NM_181708	144233	Hs.142736	NM_181708		BCDIN3D	-	BCDIN3 domain containing	protein-coding
chr6	80832111	80832663	274	NA	intron (NM_183050, intron 1 of 9)	MER11A|LTR|ERVK	16043	NM_183050	594	Hs.654441	XM_005248756	ENSG00000083123	BCKDHB	E1B|dJ279A18.1	branched chain keto acid dehydrogenase E1, beta polypeptide	protein-coding
chr6	80921659	80922006	62	NA	intron (NM_183050, intron 8 of 9)	MER11A|LTR|ERVK	105488	NM_183050	594	Hs.654441	XM_005248756	ENSG00000083123	BCKDHB	E1B|dJ279A18.1	branched chain keto acid dehydrogenase E1, beta polypeptide	protein-coding
chr14	99782615	99783141	463	NA	Intergenic	Intergenic	-44828	NM_001282237	64919	Hs.709690	XM_005268013	ENSG00000127152	BCL11B	ATL1|ATL1-alpha|ATL1-beta|ATL1-delta|ATL1-gamma|CTIP-2|CTIP2|RIT1|ZNF856B|hRIT1-alpha	B-cell CLL/lymphoma 11B (zinc finger protein)	protein-coding
chr14	99740146	99740565	160	NA	Intergenic	CpG	-2305	NM_001282237	64919	Hs.709690	XM_005268013	ENSG00000127152	BCL11B	ATL1|ATL1-alpha|ATL1-beta|ATL1-delta|ATL1-gamma|CTIP-2|CTIP2|RIT1|ZNF856B|hRIT1-alpha	B-cell CLL/lymphoma 11B (zinc finger protein)	protein-coding
chr20	30283961	30284364	197	NA	intron (NM_001191, intron 2 of 2)	intron (NM_001191, intron 2 of 2)	26494	NM_138578	598	Hs.516966	XM_005260481	ENSG00000171552	BCL2L1	BCL-XL/S|BCL2L|BCLX|BCLXL|BCLXS|Bcl-X|PPP1R52|bcl-xL|bcl-xS	BCL2-like 1	protein-coding
chr20	30292452	30292715	84	NA	intron (NM_001191, intron 2 of 2)	intron (NM_001191, intron 2 of 2)	18073	NM_138578	598	Hs.516966	XM_005260481	ENSG00000171552	BCL2L1	BCL-XL/S|BCL2L|BCLX|BCLXL|BCLXS|Bcl-X|PPP1R52|bcl-xL|bcl-xS	BCL2-like 1	protein-coding
chr20	30284982	30285268	78	NA	intron (NM_001191, intron 2 of 2)	intron (NM_001191, intron 2 of 2)	25531	NM_138578	598	Hs.516966	XM_005260481	ENSG00000171552	BCL2L1	BCL-XL/S|BCL2L|BCLX|BCLXL|BCLXS|Bcl-X|PPP1R52|bcl-xL|bcl-xS	BCL2-like 1	protein-coding
chr20	30307947	30308176	43	NA	intron (NM_001191, intron 2 of 2)	intron (NM_001191, intron 2 of 2)	2595	NM_138578	598	Hs.516966	XM_005260481	ENSG00000171552	BCL2L1	BCL-XL/S|BCL2L|BCLX|BCLXL|BCLXS|Bcl-X|PPP1R52|bcl-xL|bcl-xS	BCL2-like 1	protein-coding
chr15	52361612	52362331	949	NA	Intergenic	Intergenic	43001	NM_020396	10017	Hs.283672	XM_005254103	ENSG00000137875	BCL2L10	BCL-B|Boo|Diva	BCL2-like 10 (apoptosis facilitator)	protein-coding
chr2	111936660	111937161	478	NA	Intergenic	Intergenic	58419	NM_001204111	10018	Hs.737004	XM_005263550	ENSG00000153094	BCL2L11	BAM|BIM|BOD	BCL2-like 11 (apoptosis facilitator)	protein-coding
chr2	111790204	111790669	365	NA	intron (NM_001142807, intron 15 of 17)	intron (NM_001142807, intron 15 of 17)	-88055	NM_138622	10018	Hs.737004	XM_005263550	ENSG00000153094	BCL2L11	BAM|BIM|BOD	BCL2-like 11 (apoptosis facilitator)	protein-coding
chr2	111943170	111943483	125	NA	Intergenic	Intergenic	64835	NM_001204111	10018	Hs.737004	XM_005263550	ENSG00000153094	BCL2L11	BAM|BIM|BOD	BCL2-like 11 (apoptosis facilitator)	protein-coding
chr1	114430497	114430777	45	NA	promoter-TSS (NM_001010922)	promoter-TSS (NM_001010922)	-468	NM_001010922	440603	Hs.123106	XM_005270877		BCL2L15	Bfk|C1orf178	BCL2-like 15	protein-coding
chr19	45227916	45228892	1515	NA	Intergenic	MIR|SINE|MIR	-23574	NM_005178	602	Hs.31210	XM_005259129	ENSG00000069399	BCL3	BCL4|D19S37	B-cell CLL/lymphoma 3	protein-coding
chr19	45250186	45250951	966	NA	Intergenic	(CAGAGA)n|Simple_repeat|Simple_repeat	-1410	NM_005178	602	Hs.31210	XM_005259129	ENSG00000069399	BCL3	BCL4|D19S37	B-cell CLL/lymphoma 3	protein-coding
chr19	45245139	45245496	188	NA	Intergenic	Intergenic	-6661	NM_005178	602	Hs.31210	XM_005259129	ENSG00000069399	BCL3	BCL4|D19S37	B-cell CLL/lymphoma 3	protein-coding
chr19	45227916	45228892	84	NA	Intergenic	MIR|SINE|MIR	-23574	NM_005178	602	Hs.31210	XM_005259129	ENSG00000069399	BCL3	BCL4|D19S37	B-cell CLL/lymphoma 3	protein-coding
chr19	45248508	45248813	31	NA	Intergenic	Intergenic	-3318	NM_005178	602	Hs.31210	XM_005259129	ENSG00000069399	BCL3	BCL4|D19S37	B-cell CLL/lymphoma 3	protein-coding
chr7	72972194	72972514	37	NA	promoter-TSS (NM_001707)	promoter-TSS (NM_001707)	-289	NM_001707	9275	Hs.647051	NM_001197244	ENSG00000106635	BCL7B	-	B-cell CLL/lymphoma 7B	protein-coding
chr11	118781534	118783552	630	NA	promoter-TSS (NM_182557)	promoter-TSS (NM_182557)	-930	NM_182557	283149	Hs.414740	XM_005271511		BCL9L	BCL9-2|DLNB11	B-cell CLL/lymphoma 9-like	protein-coding
chr11	118788234	118789219	345	NA	Intergenic	Intergenic	-7113	NM_182557	283149	Hs.414740	XM_005271511		BCL9L	BCL9-2|DLNB11	B-cell CLL/lymphoma 9-like	protein-coding
chr11	118788234	118789219	298	NA	Intergenic	Intergenic	-7113	NM_182557	283149	Hs.414740	XM_005271511		BCL9L	BCL9-2|DLNB11	B-cell CLL/lymphoma 9-like	protein-coding
chr11	118781534	118783552	148	NA	promoter-TSS (NM_182557)	promoter-TSS (NM_182557)	-930	NM_182557	283149	Hs.414740	XM_005271511		BCL9L	BCL9-2|DLNB11	B-cell CLL/lymphoma 9-like	protein-coding
chr11	118803594	118803867	140	NA	Intergenic	MIR3|SINE|MIR	-22117	NM_182557	283149	Hs.414740	XM_005271511		BCL9L	BCL9-2|DLNB11	B-cell CLL/lymphoma 9-like	protein-coding
chr11	118781534	118783552	80	NA	promoter-TSS (NM_182557)	promoter-TSS (NM_182557)	-930	NM_182557	283149	Hs.414740	XM_005271511		BCL9L	BCL9-2|DLNB11	B-cell CLL/lymphoma 9-like	protein-coding
chr11	118790262	118790903	28	NA	Intergenic	Intergenic	-8969	NM_182557	283149	Hs.414740	XM_005271511		BCL9L	BCL9-2|DLNB11	B-cell CLL/lymphoma 9-like	protein-coding
chr11	118790262	118790903	21	NA	Intergenic	Intergenic	-8969	NM_182557	283149	Hs.414740	XM_005271511		BCL9L	BCL9-2|DLNB11	B-cell CLL/lymphoma 9-like	protein-coding
chr16	81309307	81309705	162	NA	intron (NM_017429, intron 7 of 10)	intron (NM_017429, intron 7 of 10)	37210	NM_017429	53630	Hs.212172	XM_005255987	ENSG00000135697	BCMO1	BCDO|BCDO1|BCMO|BCO|BCO1	beta-carotene 15,15'-monooxygenase 1	protein-coding
chr3	197317236	197317766	191	NA	Intergenic	Intergenic	-17307	NM_203315	622	Hs.274539	XM_005269352	ENSG00000161267	BDH1	BDH|SDR9C1	3-hydroxybutyrate dehydrogenase, type 1	protein-coding
chr3	197221189	197221496	146	NA	Intergenic	Intergenic	61516	NM_203314	622	Hs.274539	XM_005269352	ENSG00000161267	BDH1	BDH|SDR9C1	3-hydroxybutyrate dehydrogenase, type 1	protein-coding
chr3	197243499	197243955	138	NA	intron (NM_203314, intron 6 of 7)	MIRb|SINE|MIR	39131	NM_203314	622	Hs.274539	XM_005269352	ENSG00000161267	BDH1	BDH|SDR9C1	3-hydroxybutyrate dehydrogenase, type 1	protein-coding
chr3	197243499	197243955	128	NA	intron (NM_203314, intron 6 of 7)	MIRb|SINE|MIR	39131	NM_203314	622	Hs.274539	XM_005269352	ENSG00000161267	BDH1	BDH|SDR9C1	3-hydroxybutyrate dehydrogenase, type 1	protein-coding
chr3	197185195	197185516	58	NA	Intergenic	Intergenic	97503	NM_203314	622	Hs.274539	XM_005269352	ENSG00000161267	BDH1	BDH|SDR9C1	3-hydroxybutyrate dehydrogenase, type 1	protein-coding
chr14	96706207	96706569	214	NA	intron (NM_000623, intron 2 of 2)	intron (NM_000623, intron 2 of 2)	-16159	NM_000710	623	Hs.525572	XM_005267977	ENSG00000100739	BDKRB1	B1BKR|B1R|BKB1R|BKR1|BRADYB1	bradykinin receptor B1	protein-coding
chr14	96601419	96601930	438	NA	Intergenic	Intergenic	-69461	NM_000623	624	Hs.726620	XM_005267979	ENSG00000168398	BDKRB2	B2R|BK-2|BK2|BKR2|BRB2	bradykinin receptor B2	protein-coding
chr11	27817864	27818160	127	NA	Intergenic	Intergenic	-74407	NM_170731	627	Hs.502182	XM_005253060	ENSG00000176697	BDNF	ANON2|BULN2	brain-derived neurotrophic factor	protein-coding
chrX	102311776	102312085	138	NA	Intergenic	MIRb|SINE|MIR	7238	NM_018476	55859	Hs.334370	NM_018476	ENSG00000133169	BEX1	BEX2|HBEX2|HGR74-h	brain expressed, X-linked 1	protein-coding
chr16	14750363	14750965	331	NA	intron (NM_016561, intron 5 of 7)	intron (NM_016561, intron 5 of 7)	23996	NM_016561	51283	Hs.435556	XM_005255350	ENSG00000103429	BFAR	BAR|RNF47	bifunctional apoptosis regulator	protein-coding
chr20	17537996	17538508	67	NA	intron (NM_001278606, intron 1 of 8)	intron (NM_001278606, intron 1 of 8)	1353	NM_001278607	631	Hs.129702	NM_001161705	ENSG00000125864	BFSP1	CP115|CP94|CTRCT33|LIFL-H	beaded filament structural protein 1, filensin	protein-coding
chr7	97834081	97834716	271	NA	intron (NM_014916, intron 13 of 13)	intron (NM_014916, intron 13 of 13)	-7168	NM_177455	168620	Hs.674510	XM_005250178	ENSG00000180535	BHLHA15	BHLHB8|MIST1	basic helix-loop-helix family, member a15	protein-coding
chr7	97834081	97834716	173	NA	intron (NM_014916, intron 13 of 13)	intron (NM_014916, intron 13 of 13)	-7168	NM_177455	168620	Hs.674510	XM_005250178	ENSG00000180535	BHLHA15	BHLHB8|MIST1	basic helix-loop-helix family, member a15	protein-coding
chr12	26267323	26267796	1081	NA	Intergenic	Intergenic	10444	NM_030762	79365	Hs.177841	XM_005253481	ENSG00000123095	BHLHE41	BHLHB3|DEC2|SHARP1|hDEC2	basic helix-loop-helix family, member e41	protein-coding
chr12	26254286	26254607	71	NA	Intergenic	Intergenic	23557	NM_030762	79365	Hs.177841	XM_005253481	ENSG00000123095	BHLHE41	BHLHB3|DEC2|SHARP1|hDEC2	basic helix-loop-helix family, member e41	protein-coding
chr2	127873242	127873583	194	NA	Intergenic	Intergenic	-8509	NM_139344	274	Hs.193163	XM_005263642	ENSG00000136717	BIN1	AMPH2|AMPHL|SH3P9	bridging integrator 1	protein-coding
chr2	127811302	127811727	163	NA	exon (NM_139344, exon 12 of 18)	exon (NM_139344, exon 12 of 18)	53389	NM_139343	274	Hs.193163	XM_005263642	ENSG00000136717	BIN1	AMPH2|AMPHL|SH3P9	bridging integrator 1	protein-coding
chr2	127858356	127858632	50	NA	intron (NM_139351, intron 1 of 12)	MIRb|SINE|MIR	6409	NM_139343	274	Hs.193163	XM_005263642	ENSG00000136717	BIN1	AMPH2|AMPHL|SH3P9	bridging integrator 1	protein-coding
chr8	22500320	22500842	561	NA	promoter-TSS (NR_027715)	promoter-TSS (NR_027715)	-859	NR_027715	80094	Hs.675917	NM_025026		BIN3-IT1	-	BIN3 intronic transcript 1 (non-protein coding)	ncRNA
chr11	102217983	102218719	330	NA	5' UTR (NM_001256163, exon 1 of 9)	5' UTR (NM_001256163, exon 1 of 9)	246	NM_001256163	329	Hs.731943	NM_001166	ENSG00000110330	BIRC2	API1|HIAP2|Hiap-2|MIHB|RNF48|c-IAP1|cIAP1	baculoviral IAP repeat containing 2	protein-coding
chr11	102100356	102100625	45	NA	exon (NM_001195044, exon 8 of 8)	exon (NM_001195044, exon 8 of 8)	-87691	NM_182962	330	Hs.127799	XM_005271534	ENSG00000023445	BIRC3	AIP1|API2|CIAP2|HAIP1|HIAP1|MALT2|MIHC|RNF49|c-IAP2	baculoviral IAP repeat containing 3	protein-coding
chr10	102059939	102060360	228	NA	intron (NM_001253837, intron 2 of 15)	intron (NM_001253837, intron 2 of 15)	-13680	NM_173809	282991	Hs.715064	NM_001001342		BLOC1S2	BLOS2|CEAP|CEAP11|RP11-316M21.4	biogenesis of lysosomal organelles complex-1, subunit 2	protein-coding
chr10	102060738	102061200	106	NA	intron (NM_001253837, intron 2 of 15)	MER11B|LTR|ERVK	-14500	NM_173809	282991	Hs.715064	NM_001001342		BLOC1S2	BLOS2|CEAP|CEAP11|RP11-316M21.4	biogenesis of lysosomal organelles complex-1, subunit 2	protein-coding
chr6	8064738	8065262	84	NA	promoter-TSS (NM_201280)	promoter-TSS (NM_201280)	-353	NM_001199323	63915	Hs.719272	NM_001199322	ENSG00000188428	BLOC1S5	BLOS5|MU|MUTED	biogenesis of lysosomal organelles complex-1, subunit 5, muted	protein-coding
chr15	40374795	40375024	92	NA	Intergenic	Intergenic	23378	NM_001003942	90427	Hs.591104	XM_005254757	ENSG00000104081	BMF	-	Bcl2 modifying factor	protein-coding
chr20	6671467	6672101	1081	NA	Intergenic	L2b|LINE|L2	-76961	NM_001200	650	Hs.73853	NM_001200	ENSG00000125845	BMP2	BDA2|BMP2A	bone morphogenetic protein 2	protein-coding
chr20	6717625	6717903	119	NA	Intergenic	Intergenic	-30981	NM_001200	650	Hs.73853	NM_001200	ENSG00000125845	BMP2	BDA2|BMP2A	bone morphogenetic protein 2	protein-coding
chr20	6690678	6691128	38	NA	Intergenic	MER126|DNA|DNA	-57842	NM_001200	650	Hs.73853	NM_001200	ENSG00000125845	BMP2	BDA2|BMP2A	bone morphogenetic protein 2	protein-coding
chr14	54575550	54575765	49	NA	Intergenic	Intergenic	-152103	NM_001202	652	Hs.68879	XM_005268015	ENSG00000125378	BMP4	BMP2B|BMP2B1|MCOPS6|OFC11|ZYME	bone morphogenetic protein 4	protein-coding
chr14	54438191	54438600	32	NA	Intergenic	MLT1L|LTR|ERVL-MaLR	-14841	NM_001202	652	Hs.68879	XM_005268015	ENSG00000125378	BMP4	BMP2B|BMP2B1|MCOPS6|OFC11|ZYME	bone morphogenetic protein 4	protein-coding
chr20	55806430	55807055	836	NA	intron (NM_001719, intron 1 of 6)	intron (NM_001719, intron 1 of 6)	34965	NM_001719	655	Hs.473163	NM_001719	ENSG00000101144	BMP7	OP-1	bone morphogenetic protein 7	protein-coding
chr20	55684466	55684684	112	NA	Intergenic	MIR|SINE|MIR	157132	NM_001719	655	Hs.473163	NM_001719	ENSG00000101144	BMP7	OP-1	bone morphogenetic protein 7	protein-coding
chr7	34075635	34075950	110	NA	intron (NM_133468, intron 7 of 15)	intron (NM_133468, intron 7 of 15)	131269	NM_133468	168667	Hs.660998	XM_005249632	ENSG00000164619	BMPER	CRIM3|CV-2|CV2	BMP binding endothelial regulator	protein-coding
chr18	54877726	54878298	240	NA	Intergenic	Intergenic	63719	NM_001257964	284257	Hs.127882	NR_033372	ENSG00000228075	BOD1L2	BOD1P|FAM44C	biorientation of chromosomes in cell division 1-like 2	protein-coding
chr18	54808929	54809301	163	NA	Intergenic	Intergenic	-5178	NM_001257964	284257	Hs.127882	NR_033372	ENSG00000228075	BOD1L2	BOD1P|FAM44C	biorientation of chromosomes in cell division 1-like 2	protein-coding
chr20	31766684	31766892	60	NA	intron (NM_080574, intron 6 of 8)	intron (NM_080574, intron 6 of 8)	10828	NM_080574	140683	Hs.125960	XM_005260281	ENSG00000131050	BPIFA2	C20orf70|PSP|SPLUNC2|bA49G10.1	BPI fold containing family A, member 2	protein-coding
chr2	28152550	28153281	676	NA	intron (NM_001261840, intron 3 of 11)	intron (NM_001261840, intron 3 of 11)	-38934	NR_028308	100302650	Hs.729719	NR_028308		BRE-AS1	-	BRE antisense RNA 1	ncRNA
chr1	177188700	177189082	39	NA	intron (NM_021165, intron 1 of 7)	intron (NM_021165, intron 1 of 7)	48258	NM_021165	57795	Hs.495918	XM_005245379	ENSG00000198797	BRINP2	DBCCR1L2|FAM5B|RP5-1026E2.1	bone morphogenetic protein/retinoic acid inducible neural-specific 2	protein-coding
chr12	107608113	107608673	325	NA	Intergenic	HERV9-int|LTR|ERV1	-103804	NM_001018072	121551	Hs.271272	XM_005268645	ENSG00000151136	BTBD11	ABTB2B	BTB (POZ) domain containing 11	protein-coding
chr10	124069920	124070538	393	NA	intron (NM_144587, intron 10 of 15)	intron (NM_144587, intron 10 of 15)	39408	NM_144587	118663	Hs.422466	XM_005269493	ENSG00000138152	BTBD16	C10orf87	BTB (POZ) domain containing 16	protein-coding
chr10	124023950	124024285	301	NA	Intergenic	Intergenic	-6704	NM_144587	118663	Hs.422466	XM_005269493	ENSG00000138152	BTBD16	C10orf87	BTB (POZ) domain containing 16	protein-coding
chr1	45274549	45275153	254	NA	intron (NM_001136537, intron 1 of 7)	intron (NM_001136537, intron 1 of 7)	697	NM_001136537	149478	Hs.632400	XR_246238	ENSG00000222009	BTBD19	-	BTB (POZ) domain containing 19	protein-coding
chr20	11963161	11963564	312	NA	Intergenic	(TG)n|Simple_repeat|Simple_repeat	64849	NM_014962	22903	Hs.709366	XM_005260676	ENSG00000132640	BTBD3	dJ742J24.1	BTB (POZ) domain containing 3	protein-coding
chr6	38524099	38524656	213	NA	intron (NM_001172418, intron 5 of 10)	intron (NM_001172418, intron 5 of 10)	39466	NM_001172418	114781	Hs.603858	XM_005248840	ENSG00000183826	BTBD9	dJ322I12.1	BTB (POZ) domain containing 9	protein-coding
chr6	32374612	32374886	67	NA	intron (NM_019602, intron 1 of 5).6	intron (NM_019602, intron 1 of 5).6	151	NM_019602	56244	Hs.534471	NM_019602	ENSG00000204290	BTNL2	BTL-II|BTN7|HSBLMHC1|SS2	butyrophilin-like 2 (MHC class II associated)	protein-coding
chr5	180403621	180403840	85	NA	Intergenic	LTR19B|LTR|ERV1	-12115	NM_197975	10917	Hs.225949	XM_005265801	ENSG00000168903	BTNL3	BTN9.1|BTNLR	butyrophilin-like 3	protein-coding
chr5	180325742	180326404	1176	NA	promoter-TSS (NM_001159708)	promoter-TSS (NM_001159708)	-4	NM_001159707	79908	Hs.189109	NM_001040462	ENSG00000113303	BTNL8	BTN9.2	butyrophilin-like 8	protein-coding
chr5	180312878	180313218	149	NA	Intergenic	L1PA6|LINE|L1	-13029	NM_001159707	79908	Hs.189109	NM_001040462	ENSG00000113303	BTNL8	BTN9.2	butyrophilin-like 8	protein-coding
chr11	116433860	116434598	789	NA	Intergenic	Intergenic	209485	NM_032725	84811	Hs.437341	NM_001159736	ENSG00000137656	BUD13	Cwc26|fSAP71	BUD13 homolog (S. cerevisiae)	protein-coding
chr11	116298310	116298926	240	NA	Intergenic	Intergenic	345096	NM_032725	84811	Hs.437341	NM_001159736	ENSG00000137656	BUD13	Cwc26|fSAP71	BUD13 homolog (S. cerevisiae)	protein-coding
chr11	116316556	116317474	45	NA	Intergenic	Helitron1Na_Mam|RC|Helitron	326699	NM_032725	84811	Hs.437341	NM_001159736	ENSG00000137656	BUD13	Cwc26|fSAP71	BUD13 homolog (S. cerevisiae)	protein-coding
chr11	116316556	116317474	42	NA	Intergenic	Helitron1Na_Mam|RC|Helitron	326699	NM_032725	84811	Hs.437341	NM_001159736	ENSG00000137656	BUD13	Cwc26|fSAP71	BUD13 homolog (S. cerevisiae)	protein-coding
chr7	16718637	16718834	52	NA	intron (NR_027624, intron 3 of 10)	MER11A|LTR|ERVK	32976	NM_001159767	28969	Hs.487635	NM_001159767	ENSG00000136261	BZW2	MST017|MSTP017	basic leucine zipper and W2 domains 2	protein-coding
chr10	73398374	73398926	520	NA	intron (NM_052836, intron 11 of 12)	intron (NM_052836, intron 11 of 12)	80928	NM_001164375	414152	Hs.568788	NM_001164375	ENSG00000214688	C10orf105	-	chromosome 10 open reading frame 105	protein-coding
chr10	77796699	77797196	701	NA	intron (NM_032024, intron 2 of 5)	MIRb|SINE|MIR	254428	NM_032024	83938	Hs.690504	XM_005270212	ENSG00000148655	C10orf11	OCA5|OCA7	chromosome 10 open reading frame 11	protein-coding
chr10	77522121	77522467	103	NA	Intergenic	Intergenic	-20225	NM_032024	83938	Hs.690504	XM_005270212	ENSG00000148655	C10orf11	OCA5|OCA7	chromosome 10 open reading frame 11	protein-coding
chr10	98757997	98758413	138	NA	3' UTR (NM_003061, exon 37 of 37)	3' UTR (NM_003061, exon 37 of 37)	17164	NM_015652	26148	Hs.427927	NM_015652	ENSG00000155640	C10orf12	-	chromosome 10 open reading frame 12	protein-coding
chr10	104613554	104614082	276	NA	promoter-TSS (NR_037644)	promoter-TSS (NR_037644)	-149	NR_037644	100528007	Hs.720370	NR_037644		C10orf32-ASMT	C10orf32-AS3MT	C10orf32-ASMT readthrough (NMD candidate)	ncRNA
chr10	61731634	61732129	931	NA	Intergenic	L2a|LINE|L2	-11210	NR_024340	283025	Hs.522955	XR_246084	ENSG00000235931	C10orf40	-	chromosome 10 open reading frame 40	ncRNA
chr10	61724953	61725446	343	NA	Intergenic	Intergenic	-4528	NR_024340	283025	Hs.522955	XR_246084	ENSG00000235931	C10orf40	-	chromosome 10 open reading frame 40	ncRNA
chr10	73526575	73527569	84	NA	intron (NM_022153, intron 1 of 6)	intron (NM_022153, intron 1 of 6)	6265	NM_022153	64115	Hs.47382	NM_022153	ENSG00000107738	C10orf54	B7-H5|B7H5|GI24|PP2135|SISP1	chromosome 10 open reading frame 54	protein-coding
chr10	134272493	134273543	184	NA	Intergenic	Intergenic	14304	NM_173541	170393	Hs.375059	NM_173541		C10orf91	RP11-432J24.4|bA432J24.4	chromosome 10 open reading frame 91	protein-coding
chr10	134272493	134273543	126	NA	Intergenic	Intergenic	14304	NM_173541	170393	Hs.375059	NM_173541		C10orf91	RP11-432J24.4|bA432J24.4	chromosome 10 open reading frame 91	protein-coding
chr11	68025090	68025499	25	NA	Intergenic	Intergenic	14175	NM_022338	53838	Hs.303025	XM_005274053	ENSG00000171067	C11orf24	DM4E3	chromosome 11 open reading frame 24	protein-coding
chr11	111789470	111789748	45	NA	promoter-TSS (NM_080659)	promoter-TSS (NM_080659)	8	NM_080659	91894	Hs.97013	NM_080659	ENSG00000149300	C11orf52	-	chromosome 11 open reading frame 52	protein-coding
chr11	16842047	16842512	141	NA	intron (NM_175058, intron 10 of 22)	intron (NM_175058, intron 10 of 22)	82131	NM_014267	10944	Hs.645792	NM_001142705		C11orf58	IMAGE145052|SMAP	chromosome 11 open reading frame 58	protein-coding
chr11	101881658	101882081	72	NA	Intergenic	Intergenic	-36300	NM_001195005	85016	Hs.98328	XM_005271713	ENSG00000137691	C11orf70	-	chromosome 11 open reading frame 70	protein-coding
chr11	66501671	66501938	50	NA	Intergenic	L2b|LINE|L2	-10403	NR_048553	79703	Hs.292088	XM_005274285	ENSG00000173715	C11orf80	-	chromosome 11 open reading frame 80	protein-coding
chr11	82654385	82654924	1022	NA	Intergenic	THE1B-int|LTR|ERVL-MaLR	41917	NM_145018	220042	Hs.165607	XM_005273838	ENSG00000165490	C11orf82	noxin	chromosome 11 open reading frame 82	protein-coding
chr11	66742608	66742867	188	NA	promoter-TSS (NM_001136485)	promoter-TSS (NM_001136485)	-17	NM_001136485	254439	Hs.232604	XM_005273875	ENSG00000173237	C11orf86	-	chromosome 11 open reading frame 86	protein-coding
chr11	66738323	66738611	143	NA	Intergenic	Intergenic	-4287	NM_001136485	254439	Hs.232604	XM_005273875	ENSG00000173237	C11orf86	-	chromosome 11 open reading frame 86	protein-coding
chr11	63532449	63532909	175	NA	exon (NM_001144936, exon 3 of 5)	exon (NM_001144936, exon 3 of 5)	3434	NM_001144936	65998	Hs.191073	NM_001144936		C11orf95	RP11-466C23.3	chromosome 11 open reading frame 95	protein-coding
chr12	13530012	13530362	64	NA	promoter-TSS (NR_036555)	promoter-TSS (NR_036555)	-508	NR_036555	283422	Hs.448717	XR_242888	ENSG00000180861	C12orf36	-	chromosome 12 open reading frame 36	ncRNA
chr12	121463563	121463938	442	NA	intron (NM_198213, intron 3 of 4)	intron (NM_198213, intron 3 of 4)	-9445	NM_001286197	64897	Hs.528671	XM_005253927	ENSG00000157895	C12orf43	-	chromosome 12 open reading frame 43	protein-coding
chr12	105353178	105353424	24	NA	Intergenic	Kanga11a|DNA|TcMar-Tc2	-26797	NM_152318	121053	Hs.295563	NM_152318		C12orf45	-	chromosome 12 open reading frame 45	protein-coding
chr12	92996767	92997211	292	NA	Intergenic	Intergenic	-99630	NM_001037671	338809	Hs.326303	NM_001037671	ENSG00000214215	C12orf74	-	chromosome 12 open reading frame 74	protein-coding
chr12	92968749	92968974	151	NA	Intergenic	Intergenic	-127758	NM_001037671	338809	Hs.326303	NM_001037671	ENSG00000214215	C12orf74	-	chromosome 12 open reading frame 74	protein-coding
chr12	105711556	105712152	356	NA	Intergenic	Intergenic	-12560	NM_001145199	387882	Hs.368938	NM_207376	ENSG00000235162	C12orf75	AGD3|OCC-1|OCC1	chromosome 12 open reading frame 75	protein-coding
chr12	105703253	105703601	138	NA	Intergenic	HERVK11-int|LTR|ERVK	-20987	NM_001145199	387882	Hs.368938	NM_207376	ENSG00000235162	C12orf75	AGD3|OCC-1|OCC1	chromosome 12 open reading frame 75	protein-coding
chr12	92464834	92465242	296	NA	intron (NR_046160, intron 1 of 5)	intron (NR_046160, intron 1 of 5)	70451	NR_046159	256021	Hs.651357	NM_001256373	ENSG00000257242	C12orf79	-	chromosome 12 open reading frame 79	protein-coding
chr12	92271307	92271752	215	NA	Intergenic	Intergenic	263960	NR_046159	256021	Hs.651357	NM_001256373	ENSG00000257242	C12orf79	-	chromosome 12 open reading frame 79	protein-coding
chr13	76583730	76584201	86	NA	Intergenic	Intergenic	138791	NM_001257995	729420	Hs.586820	NM_001257995	ENSG00000178734	C13orf45	-	chromosome 13 open reading frame 45	protein-coding
chr14	57928602	57929119	152	NA	Intergenic	Intergenic	31721	NM_001283057	55195	Hs.659706	XM_005267804	ENSG00000100557	C14orf105	-	chromosome 14 open reading frame 105	protein-coding
chr14	99375632	99375900	151	NA	Intergenic	MIR3|SINE|MIR	197816	NM_182560	283598	Hs.448754	NM_182560	ENSG00000176605	C14orf177	-	chromosome 14 open reading frame 177	protein-coding
chr14	105043336	105043587	166	NA	Intergenic	Intergenic	-2560	NM_001286399	400258	Hs.153827	XM_005267637	ENSG00000184601	C14orf180	C14orf77|NRAC	chromosome 14 open reading frame 180	protein-coding
chr14	50484932	50485433	148	NA	intron (NR_102736, intron 3 of 5)	intron (NR_102736, intron 3 of 5)	-10944	NM_001012706	283551	Hs.660867	NM_001012706	ENSG00000214900	C14orf182	-	chromosome 14 open reading frame 182	protein-coding
chr14	50470038	50470670	113	NA	intron (NM_001012706, intron 1 of 3)	CpG	3884	NM_001012706	283551	Hs.660867	NM_001012706	ENSG00000214900	C14orf182	-	chromosome 14 open reading frame 182	protein-coding
chr14	50454080	50454319	48	NA	intron (NM_001012706, intron 3 of 3)	intron (NM_001012706, intron 3 of 3)	20039	NM_001012706	283551	Hs.660867	NM_001012706	ENSG00000214900	C14orf182	-	chromosome 14 open reading frame 182	protein-coding
chr14	50470038	50470670	38	NA	intron (NM_001012706, intron 1 of 3)	CpG	3884	NM_001012706	283551	Hs.660867	NM_001012706	ENSG00000214900	C14orf182	-	chromosome 14 open reading frame 182	protein-coding
chr14	50566043	50566319	116	NA	Intergenic	L2c|LINE|L2	-6820	NM_001014830	196913	Hs.406934	NM_001014830	ENSG00000168260	C14orf183	-	chromosome 14 open reading frame 183	protein-coding
chr15	38994683	38995040	272	NA	Intergenic	LTR22A|LTR|ERVK	6062	NM_207444	400359	Hs.448785	NM_207444	ENSG00000175779	C15orf53	-	chromosome 15 open reading frame 53	protein-coding
chr15	39160630	39160988	188	NA	Intergenic	Charlie25|DNA|hAT-Charlie	172010	NM_207444	400359	Hs.448785	NM_207444	ENSG00000175779	C15orf53	-	chromosome 15 open reading frame 53	protein-coding
chr15	39686143	39686487	190	NA	Intergenic	Intergenic	143430	NM_207445	400360	Hs.376109	NM_207445	ENSG00000175746	C15orf54	-	chromosome 15 open reading frame 54	protein-coding
chr15	39488313	39488650	116	NA	Intergenic	Intergenic	-54404	NM_207445	400360	Hs.376109	NM_207445	ENSG00000175746	C15orf54	-	chromosome 15 open reading frame 54	protein-coding
chr15	39566259	39566486	62	NA	Intergenic	Intergenic	23487	NM_207445	400360	Hs.376109	NM_207445	ENSG00000175746	C15orf54	-	chromosome 15 open reading frame 54	protein-coding
chr15	39605328	39605589	53	NA	Intergenic	Intergenic	62573	NM_207445	400360	Hs.376109	NM_207445	ENSG00000175746	C15orf54	-	chromosome 15 open reading frame 54	protein-coding
chr15	39446126	39446547	26	NA	Intergenic	Intergenic	-96549	NM_207445	400360	Hs.376109	NM_207445	ENSG00000175746	C15orf54	-	chromosome 15 open reading frame 54	protein-coding
chr15	41062013	41062342	35	NA	promoter-TSS (NM_001130448)	promoter-TSS (NM_001130448)	18	NM_001130448	643338	Hs.631715	NM_001130448	ENSG00000188277	C15orf62	-	chromosome 15 open reading frame 62	protein-coding
chr16	9192570	9192892	137	NA	intron (NM_014117, intron 2 of 3)	intron (NM_014117, intron 2 of 3)	7194	NM_014117	29035	Hs.221497	NM_014117		C16orf72	PRO0149	chromosome 16 open reading frame 72	protein-coding
chr16	85779975	85780231	50	NA	intron (NR_107005, intron 6 of 6)	intron (NR_107005, intron 6 of 6)	4586	NM_206967	404550	Hs.461655	NM_206967	ENSG00000154102	C16orf74	-	chromosome 16 open reading frame 74	protein-coding
chr17	65955658	65956037	126	NA	exon (NM_182641, exon 24 of 28)	exon (NM_182641, exon 24 of 28)	33918	NM_181655	284018	Hs.90790	NM_181655	ENSG00000186665	C17orf58	-	chromosome 17 open reading frame 58	protein-coding
chr17	36823807	36824096	166	NA	Intergenic	Intergenic	7236	NM_001130677	100170841	Hs.445574	NM_001130677	ENSG00000179294	C17orf96	-	chromosome 17 open reading frame 96	protein-coding
chr19	38791224	38791801	623	NA	Intergenic	Intergenic	-3292	NM_033520	64073	Hs.631544	NM_033520	ENSG00000167644	C19orf33	H2RSP|IMUP|IMUP-1|IMUP-2	chromosome 19 open reading frame 33	protein-coding
chr19	38794747	38795188	108	NA	3' UTR (NM_001145462, exon 8 of 8)	3' UTR (NM_001145462, exon 8 of 8)	163	NM_033520	64073	Hs.631544	NM_033520	ENSG00000167644	C19orf33	H2RSP|IMUP|IMUP-1|IMUP-2	chromosome 19 open reading frame 33	protein-coding
chr19	38794747	38795188	58	NA	3' UTR (NM_001145462, exon 8 of 8)	3' UTR (NM_001145462, exon 8 of 8)	163	NM_033520	64073	Hs.631544	NM_033520	ENSG00000167644	C19orf33	H2RSP|IMUP|IMUP-1|IMUP-2	chromosome 19 open reading frame 33	protein-coding
chr19	2278428	2278881	41	NA	exon (NM_198532, exon 3 of 4)	exon (NM_198532, exon 3 of 4)	3527	NM_198532	374872	Hs.511803	NM_198532	ENSG00000188305	C19orf35	-	chromosome 19 open reading frame 35	protein-coding
chr19	11050035	11050313	70	NA	Intergenic	Intergenic	10750	NM_138358	90580	Hs.164026	NM_138358	ENSG00000142444	C19orf52	-	chromosome 19 open reading frame 52	protein-coding
chr19	41242170	41242426	76	NA	intron (NM_025194, intron 4 of 6)	intron (NM_025194, intron 4 of 6)	13530	NM_198476	284325	Hs.585105	XM_005258776	ENSG00000188493	C19orf54	-	chromosome 19 open reading frame 54	protein-coding
chr19	14191791	14192166	76	NA	TTS (NM_001277378)	TTS (NM_001277378)	4629	NM_001277378	646457	Hs.569971	NM_001277378	ENSG00000188032	C19orf67	-	chromosome 19 open reading frame 67	protein-coding
chr19	49622107	49622516	40	NA	promoter-TSS (NM_003660)	promoter-TSS (NM_003660)	86	NM_018111	55150	Hs.458310	NM_018111	ENSG00000221916	C19orf73	-	chromosome 19 open reading frame 73	protein-coding
chr19	3474079	3474447	201	NA	TTS (NM_001136503)	TTS (NM_001136503)	6277	NM_001136503	284422	Hs.130714	NM_001136503	ENSG00000095932	C19orf77	-	chromosome 19 open reading frame 77	protein-coding
chr7	7194023	7194350	215	NA	Intergenic	THE1A-int|LTR|ERVL-MaLR	-28060	NM_020156	56913	Hs.239666	XM_005249812	ENSG00000106392	C1GALT1	C1GALT|T-synthase	core 1 synthase, glycoprotein-N-acetylgalactosamine 3-beta-galactosyltransferase, 1	protein-coding
chr1	244504893	244505377	67	NA	Intergenic	Intergenic	-10802	NM_001276349	200159	Hs.442703	NM_001012970	ENSG00000173728	C1orf100	-	chromosome 1 open reading frame 100	protein-coding
chr1	172328973	172329209	47	NA	intron (NM_015569, intron 17 of 20)	intron (NM_015569, intron 17 of 20)	-60737	NM_139240	92346	Hs.517991	XM_005245608	ENSG00000180999	C1orf105	-	chromosome 1 open reading frame 105	protein-coding
chr1	200865618	200866273	889	NA	intron (NM_001142569, intron 1 of 9)	intron (NM_001142569, intron 1 of 9)	1996	NM_001142569	55765	Hs.518997	NM_001142569	ENSG00000163362	C1orf106	-	chromosome 1 open reading frame 106	protein-coding
chr1	117265065	117265350	41	NA	Intergenic	Intergenic	28473	NM_001013643	388667	Hs.127851	NM_001013643	ENSG00000203864	C1orf137	-	chromosome 1 open reading frame 137	protein-coding
chr1	67603189	67603551	102	NA	Intergenic	MER77B|LTR|ERVL	-2716	NR_075077	400757	Hs.666621	NM_001013674	ENSG00000203963	C1orf141	-	chromosome 1 open reading frame 141	protein-coding
chr1	67604607	67604944	28	NA	Intergenic	MLT1K|LTR|ERVL-MaLR	-4121	NR_075077	400757	Hs.666621	NM_001013674	ENSG00000203963	C1orf141	-	chromosome 1 open reading frame 141	protein-coding
chr1	1059943	1060856	148	NA	Intergenic	Intergenic	-8663	NM_017891	54991	Hs.235095	XM_005244764	ENSG00000131591	C1orf159	-	chromosome 1 open reading frame 159	protein-coding
chr1	1059943	1060856	46	NA	Intergenic	Intergenic	-8663	NM_017891	54991	Hs.235095	XM_005244764	ENSG00000131591	C1orf159	-	chromosome 1 open reading frame 159	protein-coding
chr1	75136726	75137154	318	NA	intron (NM_001002912, intron 1 of 14)	MER11A|LTR|ERVK	2482	NM_001002912	127254	Hs.531182	XM_005270449	ENSG00000178965	C1orf173	RP11-653A5.1	chromosome 1 open reading frame 173	protein-coding
chr1	55275209	55275522	92	NA	intron (NM_152607, intron 4 of 10)	intron (NM_152607, intron 4 of 10)	3629	NM_152607	163747	Hs.376018	NM_001110533	ENSG00000162398	C1orf177	-	chromosome 1 open reading frame 177	protein-coding
chr1	206292304	206292864	698	NA	Intergenic	Intergenic	-4348	NM_001007544	440712	Hs.662248	XM_005272738		C1orf186	-	chromosome 1 open reading frame 186	protein-coding
chr1	15523693	15524224	500	NA	intron (NM_018022, intron 1 of 2)	intron (NM_018022, intron 1 of 2)	-25838	NM_001278502	727684	Hs.735267	NM_001278501		C1orf195	-	chromosome 1 open reading frame 195	protein-coding
chr1	15516258	15516878	399	NA	intron (NM_018022, intron 1 of 2)	intron (NM_018022, intron 1 of 2)	-18448	NM_001278502	727684	Hs.735267	NM_001278501		C1orf195	-	chromosome 1 open reading frame 195	protein-coding
chr1	15528484	15528842	40	NA	intron (NM_018022, intron 1 of 2)	intron (NM_018022, intron 1 of 2)	-30543	NM_001278502	727684	Hs.735267	NM_001278501		C1orf195	-	chromosome 1 open reading frame 195	protein-coding
chr1	184461288	184461652	333	NA	intron (NM_030806, intron 2 of 5)	intron (NM_030806, intron 2 of 5)	105320	NM_030806	81563	Hs.744936	NM_030806	ENSG00000116667	C1orf21	PIG13	chromosome 1 open reading frame 21	protein-coding
chr1	184448503	184448856	239	NA	intron (NM_030806, intron 2 of 5)	MIRb|SINE|MIR	92529	NM_030806	81563	Hs.744936	NM_030806	ENSG00000116667	C1orf21	PIG13	chromosome 1 open reading frame 21	protein-coding
chr1	43751238	43751974	399	NA	promoter-TSS (NM_001164829)	promoter-TSS (NM_001164829)	-318	NM_001164829	149466	Hs.158963	XM_005270522	ENSG00000253313	C1orf210	-	chromosome 1 open reading frame 210	protein-coding
chr1	178506578	178507097	179	NA	Intergenic	Intergenic	-5094	NR_033186	400798	Hs.668085	XR_241078	ENSG00000184909	C1orf220	-	chromosome 1 open reading frame 220	ncRNA
chr1	178506091	178506301	30	NA	Intergenic	Intergenic	-5735	NR_033186	400798	Hs.668085	XR_241078	ENSG00000184909	C1orf220	-	chromosome 1 open reading frame 220	ncRNA
chr1	213001021	213001507	267	NA	Intergenic	LTR40a|LTR|ERVL	19727	NM_001024601	149643	Hs.153274	NM_001024601	ENSG00000185523	C1orf227	-	chromosome 1 open reading frame 227	protein-coding
chr1	197861805	197862150	132	NA	Intergenic	L1MA9|LINE|L1	-9705	NM_001024594	388722	Hs.61329	NM_001024594	ENSG00000203724	C1orf53	-	chromosome 1 open reading frame 53	protein-coding
chr1	156427349	156427834	895	NA	Intergenic	Intergenic	-28407	NM_006365	10485	Hs.380027	XM_005244829	ENSG00000125462	C1orf61	CROC4	chromosome 1 open reading frame 61	protein-coding
chr1	209953625	209954007	384	NA	TTS (NM_001287754)	TTS (NM_001287754)	4074	NM_152485	148304	Hs.497642	NM_152485	ENSG00000162757	C1orf74	-	chromosome 1 open reading frame 74	protein-coding
chr1	209964273	209964594	143	NA	intron (NM_001206696, intron 4 of 6)	intron (NM_001206696, intron 4 of 6)	-6543	NM_152485	148304	Hs.497642	NM_152485	ENSG00000162757	C1orf74	-	chromosome 1 open reading frame 74	protein-coding
chr12	49725745	49726230	68	NA	TTS (NM_005480)	TTS (NM_005480)	4984	NM_001008223	338761	Hs.380386	NM_001008223	ENSG00000186897	C1QL4	C1QTNF11|CTRP11	complement component 1, q subcomponent-like 4	protein-coding
chr17	77022756	77023258	385	NA	intron (NR_049769, intron 1 of 3)	intron (NR_049769, intron 1 of 3)	730	NR_040018	100507410	Hs.666723	NR_040018	ENSG00000265096	C1QTNF1-AS1	-	C1QTNF1 antisense RNA 1	ncRNA
chr22	37593119	37593352	60	NA	Intergenic	Intergenic	-8905	NM_031910	114904	Hs.22011	XM_005261325	ENSG00000133466	C1QTNF6	CTFP6|CTRP6|ZACRP6	C1q and tumor necrosis factor related protein 6	protein-coding
chr16	1139724	1140451	444	NA	3' UTR (NM_207419, exon 5 of 5)	3' UTR (NM_207419, exon 5 of 5)	6157	NM_207419	390664	Hs.527853	XR_243281		C1QTNF8	CTRP8|UNQ5829	C1q and tumor necrosis factor related protein 8	protein-coding
chr20	31061240	31061715	437	NA	intron (NM_080616, intron 2 of 7)	intron (NM_080616, intron 2 of 7)	9908	NM_080616	140688	Hs.729596	XM_005260282	ENSG00000197183	C20orf112	C20orf113|dJ1184F4.2|dJ1184F4.4	chromosome 20 open reading frame 112	protein-coding
chr20	31063094	31063474	101	NA	intron (NM_001256798, intron 4 of 10)	intron (NM_001256798, intron 4 of 10)	8101	NM_080616	140688	Hs.729596	XM_005260282	ENSG00000197183	C20orf112	C20orf113|dJ1184F4.2|dJ1184F4.4	chromosome 20 open reading frame 112	protein-coding
chr20	31053256	31053656	60	NA	intron (NM_080616, intron 2 of 7)	intron (NM_080616, intron 2 of 7)	17929	NM_080616	140688	Hs.729596	XM_005260282	ENSG00000197183	C20orf112	C20orf113|dJ1184F4.2|dJ1184F4.4	chromosome 20 open reading frame 112	protein-coding
chr20	5717801	5718347	1038	NA	Intergenic	Intergenic	-12969	NM_152504	149840	Hs.529340	NM_152504	ENSG00000171984	C20orf196	-	chromosome 20 open reading frame 196	protein-coding
chr20	35236228	35236916	622	NA	intron (NR_026562, intron 3 of 4)	intron (NR_026562, intron 3 of 4)	2435	NR_026562	55969	Hs.584985	NM_199484	ENSG00000101084	C20orf24	RIP5	chromosome 20 open reading frame 24	protein-coding
chr20	18859940	18860341	204	NA	Intergenic	L1PB1|LINE|L1	-49301	NM_001242671	100128496	Hs.664484	NM_001242671	ENSG00000149443	C20orf78	dJ1068E13.1	chromosome 20 open reading frame 78	protein-coding
chr20	56684590	56685170	572	NA	Intergenic	MLT1A0-int|LTR|ERVL-MaLR	-41103	NM_178456	128602	Hs.43977	NM_178456	ENSG00000124237	C20orf85	LLC1|bA196N14.1	chromosome 20 open reading frame 85	protein-coding
chr21	45590032	45590639	577	NA	Intergenic	Intergenic	36841	NM_004649	8209	Hs.413482	XM_005261183	ENSG00000160221	C21orf33	ES1|GT335|HES1|KNPH|KNPI	chromosome 21 open reading frame 33	protein-coding
chr21	45595965	45596321	173	NA	Intergenic	Intergenic	42649	NM_004649	8209	Hs.413482	XM_005261183	ENSG00000160221	C21orf33	ES1|GT335|HES1|KNPH|KNPI	chromosome 21 open reading frame 33	protein-coding
chr21	18844878	18845390	352	NA	Intergenic	Intergenic	33926	NR_037585	100505929	Hs.46707	NM_001005521	ENSG00000232560	C21orf37	-	chromosome 21 open reading frame 37	ncRNA
chr21	18834910	18835208	311	NA	Intergenic	Intergenic	23851	NR_037585	100505929	Hs.46707	NM_001005521	ENSG00000232560	C21orf37	-	chromosome 21 open reading frame 37	ncRNA
chr22	19837363	19837801	110	NA	3' UTR (NM_024627, exon 3 of 3)	3' UTR (NM_024627, exon 3 of 3)	4789	NM_024627	79680	Hs.105642	NM_024627	ENSG00000215012	C22orf29	BOP	chromosome 22 open reading frame 29	protein-coding
chr22	19828538	19828802	68	NA	intron (NM_053004, intron 2 of 7)	L1MC3|LINE|L1	13701	NM_024627	79680	Hs.105642	NM_024627	ENSG00000215012	C22orf29	BOP	chromosome 22 open reading frame 29	protein-coding
chr22	49895811	49896114	102	NA	Intergenic	Intergenic	155228	NR_026997	348645	Hs.133159	XR_244372	ENSG00000188511	C22orf34	-	chromosome 22 open reading frame 34	ncRNA
chr15	62427803	62428476	151	NA	Intergenic	Intergenic	29343	NM_001007595	388125	Hs.144372	XM_005254368	ENSG00000205502	C2CD4B	FAM148B|NLF2	C2 calcium-dependent domain containing 4B	protein-coding
chr15	62433977	62434265	100	NA	Intergenic	MER34B|LTR|ERV1	23361	NM_001007595	388125	Hs.144372	XM_005254368	ENSG00000205502	C2CD4B	FAM148B|NLF2	C2 calcium-dependent domain containing 4B	protein-coding
chr15	62427803	62428476	71	NA	Intergenic	Intergenic	29343	NM_001007595	388125	Hs.144372	XM_005254368	ENSG00000205502	C2CD4B	FAM148B|NLF2	C2 calcium-dependent domain containing 4B	protein-coding
chr2	106647503	106647753	21	NA	Intergenic	Intergenic	-34485	NM_032411	84417	Hs.43125	NM_032411	ENSG00000119147	C2orf40	ECRG4	chromosome 2 open reading frame 40	protein-coding
chr2	47306093	47306496	373	NA	Intergenic	L1MC4|LINE|L1	76223	NM_173649	285051	Hs.531575	NM_001163561	ENSG00000239605	C2orf61	-	chromosome 2 open reading frame 61	protein-coding
chr2	47315753	47316322	263	NA	intron (NM_001163561, intron 6 of 6)	intron (NM_001163561, intron 6 of 6)	66480	NM_173649	285051	Hs.531575	NM_001163561	ENSG00000239605	C2orf61	-	chromosome 2 open reading frame 61	protein-coding
chr2	47292518	47292834	93	NA	intron (NM_001288953, intron 20 of 20)	MER34A1|LTR|ERV1	89841	NM_173649	285051	Hs.531575	NM_001163561	ENSG00000239605	C2orf61	-	chromosome 2 open reading frame 61	protein-coding
chr2	47304153	47304443	62	NA	Intergenic	Intergenic	78219	NM_173649	285051	Hs.531575	NM_001163561	ENSG00000239605	C2orf61	-	chromosome 2 open reading frame 61	protein-coding
chr2	231898946	231899290	122	NA	Intergenic	Intergenic	-3163	NM_001144994	257407	Hs.551993	NM_001144994	ENSG00000204128	C2orf72	-	chromosome 2 open reading frame 72	protein-coding
chr2	233738958	233739387	163	NA	intron (NM_206895, intron 1 of 2)	L1MC4|LINE|L1	4178	NM_206895	389084	Hs.657509	XM_005246548	ENSG00000182600	C2orf82	UNQ830	chromosome 2 open reading frame 82	protein-coding
chr2	191001183	191001514	190	NA	Intergenic	LTR22A|LTR|ERVK	-1138	NM_001042521	84281	Hs.389311	XM_005246903	ENSG00000187699	C2orf88	smAKAP	chromosome 2 open reading frame 88	protein-coding
chr3	112822590	112822949	174	NA	Intergenic	MIR|SINE|MIR	-84214	NR_027796	25871	Hs.591288	XM_005247273	ENSG00000163608	C3orf17	NET17	chromosome 3 open reading frame 17	protein-coding
chr3	111803841	111804398	373	NA	Intergenic	Intergenic	-1063	NM_001171747	79669	Hs.434247	XM_005247764	ENSG00000114529	C3orf52	TTMP	chromosome 3 open reading frame 52	protein-coding
chr3	111793810	111794103	74	NA	intron (NR_026734, intron 13 of 16)	intron (NR_026734, intron 13 of 16)	-11226	NM_001171747	79669	Hs.434247	XM_005247764	ENSG00000114529	C3orf52	TTMP	chromosome 3 open reading frame 52	protein-coding
chr3	144664484	144664732	107	NA	Intergenic	L1MC3|LINE|L1	972441	NM_001134470	205428	Hs.288954	NM_001134470	ENSG00000181744	C3orf58	DIA1|GoPro49|HASF	chromosome 3 open reading frame 58	protein-coding
chr3	153452613	153452952	360	NA	Intergenic	MER68|LTR|ERVL	250498	NM_001101337	152118	Hs.58586	NM_001101337	ENSG00000237787	C3orf79	-	chromosome 3 open reading frame 79	protein-coding
chr3	153317478	153317831	201	NA	Intergenic	Intergenic	115370	NM_001101337	152118	Hs.58586	NM_001101337	ENSG00000237787	C3orf79	-	chromosome 3 open reading frame 79	protein-coding
chr3	153309336	153309699	92	NA	Intergenic	Intergenic	107233	NM_001101337	152118	Hs.58586	NM_001101337	ENSG00000237787	C3orf79	-	chromosome 3 open reading frame 79	protein-coding
chr3	153358592	153359010	55	NA	Intergenic	L1PBa1|LINE|L1	156517	NM_001101337	152118	Hs.58586	NM_001101337	ENSG00000237787	C3orf79	-	chromosome 3 open reading frame 79	protein-coding
chr3	153358592	153359010	34	NA	Intergenic	L1PBa1|LINE|L1	156517	NM_001101337	152118	Hs.58586	NM_001101337	ENSG00000237787	C3orf79	-	chromosome 3 open reading frame 79	protein-coding
chr19	10147192	10147693	475	NA	Intergenic	Intergenic	-4590	NR_027300	388503	Hs.655363	NM_001013640	ENSG00000167798	C3P1	CPLP	complement component 3 precursor pseudogene	pseudo
chr1	207262166	207263032	153	NA	promoter-TSS (NM_000716)	promoter-TSS (NM_000716)	15	NM_001017364	725	Hs.99886	XM_005273253	ENSG00000123843	C4BPB	C4BP	complement component 4 binding protein, beta	protein-coding
chr1	207262166	207263032	107	NA	promoter-TSS (NM_000716)	promoter-TSS (NM_000716)	15	NM_001017364	725	Hs.99886	XM_005273253	ENSG00000123843	C4BPB	C4BP	complement component 4 binding protein, beta	protein-coding
chr4	113004414	113004779	163	NA	Intergenic	Intergenic	-61957	NM_152400	132720	Hs.23439	NM_152400		C4orf32	-	chromosome 4 open reading frame 32	protein-coding
chr4	112879200	112879499	120	NA	Intergenic	L2a|LINE|L2	-187204	NM_152400	132720	Hs.23439	NM_152400		C4orf32	-	chromosome 4 open reading frame 32	protein-coding
chr4	159927359	159927684	138	NA	intron (NM_152543, intron 1 of 4)	intron (NM_152543, intron 1 of 4)	28812	NM_152543	152940	Hs.415576	NM_152543		C4orf45	-	chromosome 4 open reading frame 45	protein-coding
chr4	159841688	159842132	102	NA	intron (NM_152543, intron 3 of 4)	MER11A|LTR|ERVK	114423	NM_152543	152940	Hs.415576	NM_152543		C4orf45	-	chromosome 4 open reading frame 45	protein-coding
chr4	159992554	159992853	84	NA	Intergenic	Intergenic	-36370	NM_152543	152940	Hs.415576	NM_152543		C4orf45	-	chromosome 4 open reading frame 45	protein-coding
chr5	131765450	131765872	326	NA	intron (NR_045116, intron 2 of 3)	MIR|SINE|MIR	19196	NR_045116	441108	Hs.658288	NM_001013717	ENSG00000197536	C5orf56	-	chromosome 5 open reading frame 56	ncRNA
chr5	126499475	126499768	93	NA	Intergenic	Intergenic	-90437	NM_001164479	401207	Hs.49573	NM_001164478	ENSG00000164241	C5orf63	YDR286C	chromosome 5 open reading frame 63	protein-coding
chr6	34625099	34625849	1123	NA	intron (NM_024294, intron 1 of 4)	intron (NM_024294, intron 1 of 4)	39153	NM_024294	64771	Hs.716193	XM_005249298	ENSG00000196821	C6orf106	FP852|dJ391O22.4	chromosome 6 open reading frame 106	protein-coding
chr6	34641796	34642528	801	NA	intron (NM_024294, intron 1 of 4)	MIR|SINE|MIR	22465	NM_024294	64771	Hs.716193	XM_005249298	ENSG00000196821	C6orf106	FP852|dJ391O22.4	chromosome 6 open reading frame 106	protein-coding
chr6	34649547	34649744	42	NA	intron (NM_024294, intron 1 of 4)	AluSg|SINE|Alu	14982	NM_024294	64771	Hs.716193	XM_005249298	ENSG00000196821	C6orf106	FP852|dJ391O22.4	chromosome 6 open reading frame 106	protein-coding
chr6	168083642	168084269	729	NA	Intergenic	Intergenic	113584	NR_026773	26238	Hs.520583	NR_026773	ENSG00000146521	C6orf123	HGC6.2|RP3-431P23.4|dJ431P23.4	chromosome 6 open reading frame 123	ncRNA
chr6	168076748	168077257	503	NA	Intergenic	Intergenic	120537	NR_026773	26238	Hs.520583	NR_026773	ENSG00000146521	C6orf123	HGC6.2|RP3-431P23.4|dJ431P23.4	chromosome 6 open reading frame 123	ncRNA
chr6	42085954	42086852	2900	NA	intron (NM_001164446, intron 2 of 4)	intron (NM_001164446, intron 2 of 4)	24312	NM_001164446	647024	Hs.444277	NM_001164446	ENSG00000188112	C6orf132	bA7K24.2	chromosome 6 open reading frame 132	protein-coding
chr6	42107712	42108322	1448	NA	intron (NM_001164446, intron 1 of 4)	intron (NM_001164446, intron 1 of 4)	2698	NM_001164446	647024	Hs.444277	NM_001164446	ENSG00000188112	C6orf132	bA7K24.2	chromosome 6 open reading frame 132	protein-coding
chr6	42081659	42082092	573	NA	intron (NM_001164446, intron 2 of 4)	intron (NM_001164446, intron 2 of 4)	28840	NM_001164446	647024	Hs.444277	NM_001164446	ENSG00000188112	C6orf132	bA7K24.2	chromosome 6 open reading frame 132	protein-coding
chr6	42090476	42090893	480	NA	intron (NM_001164446, intron 2 of 4)	intron (NM_001164446, intron 2 of 4)	20031	NM_001164446	647024	Hs.444277	NM_001164446	ENSG00000188112	C6orf132	bA7K24.2	chromosome 6 open reading frame 132	protein-coding
chr6	42104683	42105091	190	NA	intron (NM_001164446, intron 1 of 4)	intron (NM_001164446, intron 1 of 4)	5828	NM_001164446	647024	Hs.444277	NM_001164446	ENSG00000188112	C6orf132	bA7K24.2	chromosome 6 open reading frame 132	protein-coding
chr6	42067863	42068372	101	NA	TTS (NM_001164446)	TTS (NM_001164446)	42598	NM_001164446	647024	Hs.444277	NM_001164446	ENSG00000188112	C6orf132	bA7K24.2	chromosome 6 open reading frame 132	protein-coding
chr6	42085065	42085373	57	NA	intron (NM_001164446, intron 2 of 4)	intron (NM_001164446, intron 2 of 4)	25496	NM_001164446	647024	Hs.444277	NM_001164446	ENSG00000188112	C6orf132	bA7K24.2	chromosome 6 open reading frame 132	protein-coding
chr6	42110305	42110708	41	NA	5' UTR (NM_001164446, exon 1 of 5)	5' UTR (NM_001164446, exon 1 of 5)	209	NM_001164446	647024	Hs.444277	NM_001164446	ENSG00000188112	C6orf132	bA7K24.2	chromosome 6 open reading frame 132	protein-coding
chr6	42110305	42110708	29	NA	5' UTR (NM_001164446, exon 1 of 5)	5' UTR (NM_001164446, exon 1 of 5)	209	NM_001164446	647024	Hs.444277	NM_001164446	ENSG00000188112	C6orf132	bA7K24.2	chromosome 6 open reading frame 132	protein-coding
chr6	49524329	49524698	140	NA	Intergenic	Intergenic	6400	NM_001145652	135398	Hs.722010	XM_005248850	ENSG00000197261	C6orf141	-	chromosome 6 open reading frame 141	protein-coding
chr6	2515135	2515700	1053	NA	Intergenic	Intergenic	119881	NM_152554	154386	Hs.680574	NM_152554		C6orf195	RP11-145H9.2|bA145H9.2	chromosome 6 open reading frame 195	protein-coding
chr6	36302509	36303092	447	NA	intron (NM_001010903, intron 1 of 11)	intron (NM_001010903, intron 1 of 11)	1862	NM_001010903	389384	Hs.162104	NM_001010903	ENSG00000189325	C6orf222	-	chromosome 6 open reading frame 222	protein-coding
chr6	36288424	36288632	50	NA	intron (NM_001010903, intron 10 of 11)	intron (NM_001010903, intron 10 of 11)	16134	NM_001010903	389384	Hs.162104	NM_001010903	ENSG00000189325	C6orf222	-	chromosome 6 open reading frame 222	protein-coding
chr6	44010793	44011216	127	NA	Intergenic	Intergenic	42667	NM_153246	221416	Hs.531926	NM_001171992	ENSG00000181577	C6orf223	-	chromosome 6 open reading frame 223	protein-coding
chr6	44026220	44026492	64	NA	Intergenic	Intergenic	58019	NM_153246	221416	Hs.531926	NM_001171992	ENSG00000181577	C6orf223	-	chromosome 6 open reading frame 223	protein-coding
chr6	71216862	71217276	160	NA	intron (NM_001105531, intron 12 of 21)	intron (NM_001105531, intron 12 of 21)	-59556	NM_145267	135154	Hs.418495	NM_145267		C6orf57	-	chromosome 6 open reading frame 57	protein-coding
chr6	36881797	36882371	362	NA	exon (NM_001286635, exon 5 of 9)	exon (NM_001286635, exon 5 of 9)	28444	NM_001286635	221477	Hs.433381	XM_005248918	ENSG00000198663	C6orf89	BRAP	chromosome 6 open reading frame 89	protein-coding
chr7	148144499	148144919	317	NA	Intergenic	Intergenic	-142948	NM_145304	202865	Hs.352212	NM_145304	ENSG00000170279	C7orf33	-	chromosome 7 open reading frame 33	protein-coding
chr7	148159916	148160149	23	NA	Intergenic	MER11A|LTR|ERVK	-127625	NM_145304	202865	Hs.352212	NM_145304	ENSG00000170279	C7orf33	-	chromosome 7 open reading frame 33	protein-coding
chr7	134855528	134855769	82	NA	promoter-TSS (NM_024033)	promoter-TSS (NM_024033)	-70	NM_001243751	78996	Hs.744954	XM_005250576	ENSG00000122783	C7orf49	MRI	chromosome 7 open reading frame 49	protein-coding
chr7	139025067	139025462	38	NA	promoter-TSS (NM_001244584)	promoter-TSS (NM_001244584)	68	NR_073059	154791	Hs.718441	NM_197964	ENSG00000164898	C7orf55	FMC1	chromosome 7 open reading frame 55	protein-coding
chr7	26728040	26728403	252	NA	intron (NM_003930, intron 10 of 12)	intron (NM_003930, intron 10 of 12)	50731	NM_001145531	285941	Hs.413394	XM_005249717	ENSG00000222004	C7orf71	-	chromosome 7 open reading frame 71	protein-coding
chr7	26739436	26739668	138	NA	intron (NM_003930, intron 9 of 12)	L3|LINE|CR1	62062	NM_001145531	285941	Hs.413394	XM_005249717	ENSG00000222004	C7orf71	-	chromosome 7 open reading frame 71	protein-coding
chr1	57745908	57746146	133	NA	intron (NM_021080, intron 4 of 16)	intron (NM_021080, intron 4 of 16)	-314214	NM_001278544	732	Hs.391835	XM_005271166	ENSG00000021852	C8B	C82	complement component 8, beta polypeptide	protein-coding
chr8	11218483	11219626	336	NA	intron (NR_001578, intron 5 of 8)	intron (NR_001578, intron 5 of 8)	-6857	NR_026814	83656	Hs.583896	XR_246633	ENSG00000184608	C8orf12	-	chromosome 8 open reading frame 12	ncRNA
chr8	11218483	11219626	276	NA	intron (NR_001578, intron 5 of 8)	intron (NR_001578, intron 5 of 8)	-6857	NR_026814	83656	Hs.583896	XR_246633	ENSG00000184608	C8orf12	-	chromosome 8 open reading frame 12	ncRNA
chr8	50025400	50025636	137	NA	Intergenic	MLT2B1|LTR|ERVL	40618	NM_001256597	492307	Hs.741050	NM_001007176	ENSG00000168333	C8orf22	-	chromosome 8 open reading frame 22	protein-coding
chr8	39912015	39912611	884	NA	Intergenic	Intergenic	-98674	NM_020130	56892	Hs.745031	NM_020130	ENSG00000176907	C8orf4	TC-1|TC1	chromosome 8 open reading frame 4	protein-coding
chr8	86132676	86133079	131	NA	promoter-TSS (NM_001099670)	promoter-TSS (NM_001099670)	-234	NM_001099670	401466	Hs.443072	NM_001099670	ENSG00000176731	C8orf59	-	chromosome 8 open reading frame 59	protein-coding
chr8	10534282	10534543	35	NA	intron (NM_001040032, intron 2 of 3)	intron (NM_001040032, intron 2 of 3)	4265	NM_001040032	203076	Hs.371776	NM_001040032	ENSG00000171060	C8orf74	-	chromosome 8 open reading frame 74	protein-coding
chr9	132096451	132096716	59	NA	Intergenic	Intergenic	13288	NM_001012715	414318	Hs.449434	NM_001012715		C9orf106	bA65J3.5	chromosome 9 open reading frame 106	protein-coding
chr9	139916559	139916871	152	NA	intron (NM_212533, intron 6 of 48)	intron (NM_212533, intron 6 of 48)	-5201	NM_207511	401563	Hs.522509	XM_005266086	ENSG00000180539	C9orf139	-	chromosome 9 open reading frame 139	protein-coding
chr9	112982934	112983584	1596	NA	Intergenic	Intergenic	-12846	NM_001012993	401546	Hs.125608	NM_001012993	ENSG00000188959	C9orf152	bA470J20.2	chromosome 9 open reading frame 152	protein-coding
chr9	89860177	89860441	60	NA	Intergenic	Intergenic	96750	NM_001001709	401535	Hs.657740	NM_001001709	ENSG00000204446	C9orf170	-	chromosome 9 open reading frame 170	protein-coding
chr9	139735698	139736058	182	NA	TTS (NM_001173988)	TTS (NM_001173988)	-2989	NM_001080482	389813	Hs.495485	NM_001080482	ENSG00000232434	C9orf172	-	chromosome 9 open reading frame 172	protein-coding
chr9	74659002	74659546	609	NA	Intergenic	MLT2D|LTR|ERVL	16247	NM_001128618	138240	Hs.371235	XM_005251703	ENSG00000204669	C9orf57	RP11-346E17.3	chromosome 9 open reading frame 57	protein-coding
chr9	74641035	74641340	155	NA	Intergenic	Intergenic	34334	NM_001128618	138240	Hs.371235	XM_005251703	ENSG00000204669	C9orf57	RP11-346E17.3	chromosome 9 open reading frame 57	protein-coding
chr9	74645729	74645928	76	NA	Intergenic	L2b|LINE|L2	29693	NM_001128618	138240	Hs.371235	XM_005251703	ENSG00000204669	C9orf57	RP11-346E17.3	chromosome 9 open reading frame 57	protein-coding
chr9	86571172	86572020	1259	NA	promoter-TSS (NM_032307)	promoter-TSS (NM_032307)	67	NM_032307	84267	Hs.208914	XM_005252271	ENSG00000165118	C9orf64	-	chromosome 9 open reading frame 64	protein-coding
chr9	27629484	27629867	313	NA	Intergenic	Intergenic	-55811	NM_001256054	203228	Hs.493639	NM_001256054	ENSG00000147894	C9orf72	ALSFTD|FTDALS	chromosome 9 open reading frame 72	protein-coding
chr9	27626083	27626454	49	NA	Intergenic	Zaphod|DNA|hAT-Tip100	-52404	NM_001256054	203228	Hs.493639	NM_001256054	ENSG00000147894	C9orf72	ALSFTD|FTDALS	chromosome 9 open reading frame 72	protein-coding
chr9	16394642	16394889	151	NA	Intergenic	MER11A|LTR|ERVK	-118454	NR_073471	100129385	Hs.586441	NM_001271829	ENSG00000205549	C9orf92	Em:AL513424.1	chromosome 9 open reading frame 92	protein-coding
chr8	86235743	86236376	791	NA	Intergenic	MER11A|LTR|ERVK	17884	NM_001164830	759	Hs.23118	XM_005251302	ENSG00000133742	CA1	CA-I|CAB|Car1|HEL-S-11	carbonic anhydrase I	protein-coding
chr8	86148792	86149321	970	NA	Intergenic	Intergenic	-8660	NM_198584	377677	Hs.127189	XM_005251230	ENSG00000185015	CA13	CAXIII	carbonic anhydrase XIII	protein-coding
chr8	86151970	86152258	94	NA	Intergenic	MER50|LTR|ERV1	-5602	NM_198584	377677	Hs.127189	XM_005251230	ENSG00000185015	CA13	CAXIII	carbonic anhydrase XIII	protein-coding
chr17	58247552	58248305	394	NA	Intergenic	Intergenic	20626	NM_000717	762	Hs.89485	XM_005257639	ENSG00000167434	CA4	CAIV|Car4|RP17	carbonic anhydrase IV	protein-coding
chr8	61110316	61110801	68	NA	intron (NM_004056, intron 8 of 8)	L1M5|LINE|L1	83396	NM_004056	767	Hs.654388	NM_004056		CA8	CA-VIII|CALS|CAMRQ3|CARP	carbonic anhydrase VIII	protein-coding
chr18	20679514	20680026	519	NA	Intergenic	Intergenic	-34758	NM_001256438	91768	Hs.11108	NM_001100619	ENSG00000134508	CABLES1	CABL1|CABLES|HsT2563|IK3-1	Cdk5 and Abl enzyme substrate 1	protein-coding
chr18	20686539	20686832	94	NA	Intergenic	Intergenic	-27843	NM_001256438	91768	Hs.11108	NM_001100619	ENSG00000134508	CABLES1	CABL1|CABLES|HsT2563|IK3-1	Cdk5 and Abl enzyme substrate 1	protein-coding
chr18	20862067	20862385	58	NA	Intergenic	Intergenic	126437	NM_138375	91768	Hs.11108	NM_001100619	ENSG00000134508	CABLES1	CABL1|CABLES|HsT2563|IK3-1	Cdk5 and Abl enzyme substrate 1	protein-coding
chr18	20721371	20721780	35	NA	intron (NM_001100619, intron 1 of 9)	intron (NM_001100619, intron 1 of 9)	5848	NM_001100619	91768	Hs.11108	NM_001100619	ENSG00000134508	CABLES1	CABL1|CABLES|HsT2563|IK3-1	Cdk5 and Abl enzyme substrate 1	protein-coding
chr18	20864054	20864292	32	NA	Intergenic	MER41B|LTR|ERV1	128384	NM_138375	91768	Hs.11108	NM_001100619	ENSG00000134508	CABLES1	CABL1|CABLES|HsT2563|IK3-1	Cdk5 and Abl enzyme substrate 1	protein-coding
chr18	20721371	20721780	20	NA	intron (NM_001100619, intron 1 of 9)	intron (NM_001100619, intron 1 of 9)	5848	NM_001100619	91768	Hs.11108	NM_001100619	ENSG00000134508	CABLES1	CABL1|CABLES|HsT2563|IK3-1	Cdk5 and Abl enzyme substrate 1	protein-coding
chr1	64971817	64972085	112	NA	intron (NM_020925, intron 1 of 26)	intron (NM_020925, intron 1 of 26)	35475	NM_020925	57685	Hs.443891	NM_020925	ENSG00000158966	CACHD1	RP4-655E10.1	cache domain containing 1	protein-coding
chr12	2277975	2278472	715	NA	intron (NM_000719, intron 3 of 46)	intron (NM_000719, intron 3 of 46)	54424	NR_046578	100874234	Hs.372570	NR_046578	ENSG00000256025	CACNA1C-AS4	RP1-53O8.1	CACNA1C antisense RNA 4	ncRNA
chr12	2272405	2272945	207	NA	intron (NM_000719, intron 3 of 46)	intron (NM_000719, intron 3 of 46)	59972	NR_046578	100874234	Hs.372570	NR_046578	ENSG00000256025	CACNA1C-AS4	RP1-53O8.1	CACNA1C antisense RNA 4	ncRNA
chr12	2448271	2448690	210	NA	intron (NM_000719, intron 3 of 46)	Tigger3b|DNA|TcMar-Tigger	69538	NR_046769	100874370	Hs.653548	NR_046769		CACNA1C-IT3	RP5-977L1.1	CACNA1C intronic transcript 3 (non-protein coding)	ncRNA
chr3	53512417	53512708	93	NA	Intergenic	Intergenic	-16514	NM_001128840	776	Hs.476358	XM_005265448	ENSG00000157388	CACNA1D	CACH3|CACN4|CACNL1A2|CCHL1A2|Cav1.3|PASNA|SANDD	calcium channel, voltage-dependent, L type, alpha 1D subunit	protein-coding
chr1	181420741	181421199	355	NA	Intergenic	L2|LINE|L2	-31716	NM_001205293	777	Hs.437444	XM_005245477	ENSG00000198216	CACNA1E	BII|CACH6|CACNL1A6|Cav2.3	calcium channel, voltage-dependent, R type, alpha 1E subunit	protein-coding
chr7	82342856	82343214	126	NA	Intergenic	Intergenic	-270004	NM_000722	781	Hs.743228	XM_005250569	ENSG00000153956	CACNA2D1	CACNA2|CACNL2A|CCHL2A|LINC01112|lncRNA-N3	calcium channel, voltage-dependent, alpha 2/delta subunit 1	protein-coding
chr22	37079250	37079460	60	NA	intron (NM_006078, intron 1 of 3)	intron (NM_006078, intron 1 of 3)	19335	NM_006078	10369	Hs.146766	NM_006078		CACNG2	MRD10|RP5-1119A7.17	calcium channel, voltage-dependent, gamma subunit 2	protein-coding
chr17	64947913	64948582	354	NA	Intergenic	Intergenic	-12733	NM_014405	27092	Hs.514423	NM_014405	ENSG00000075461	CACNG4	-	calcium channel, voltage-dependent, gamma subunit 4	protein-coding
chr11	115419595	115420002	311	NA	Intergenic	Intergenic	-44557	NM_001098517	23705	Hs.370510	XM_005271491	ENSG00000182985	CADM1	BL2|IGSF4|IGSF4A|NECL2|Necl-2|RA175|ST17|SYNCAM|TSLC1|sTSLC-1|sgIGSF|synCAM1	cell adhesion molecule 1	protein-coding
chr3	86162219	86162760	541	NA	Intergenic	THE1B-int|LTR|ERVL-MaLR	-285289	NR_046752	100874037	Hs.570566	NR_046752	ENSG00000241648	CADM2-AS2	RP11-341J3.1	CADM2 antisense RNA 2	ncRNA
chr3	62903887	62904854	239	NA	Intergenic	MER53|DNA|hAT	-43306	NM_183393	8618	Hs.654933	XM_005265519	ENSG00000163618	CADPS	CADPS1|CAPS|CAPS1	Ca++-dependent secretion activator	protein-coding
chr3	62718232	62718610	151	NA	intron (NM_003716, intron 3 of 29)	intron (NM_003716, intron 3 of 29)	142643	NM_003716	8618	Hs.654933	XM_005265519	ENSG00000163618	CADPS	CADPS1|CAPS|CAPS1	Ca++-dependent secretion activator	protein-coding
chr3	62903887	62904854	82	NA	Intergenic	MER53|DNA|hAT	-43306	NM_183393	8618	Hs.654933	XM_005265519	ENSG00000163618	CADPS	CADPS1|CAPS|CAPS1	Ca++-dependent secretion activator	protein-coding
chr3	62907989	62908249	68	NA	Intergenic	MLT2A2|LTR|ERVL	-47055	NM_183393	8618	Hs.654933	XM_005265519	ENSG00000163618	CADPS	CADPS1|CAPS|CAPS1	Ca++-dependent secretion activator	protein-coding
chr16	71372293	71372766	71	NA	Intergenic	Intergenic	-20087	NR_027910	794	Hs.106857	NM_001740	ENSG00000172137	CALB2	CAB29|CAL2|CR	calbindin 2	protein-coding
chr2	188365807	188366175	268	NA	intron (NM_001032281, intron 2 of 6)	intron (NM_001032281, intron 2 of 6)	-52970	NM_005795	10203	Hs.744587	XM_005246231	ENSG00000064989	CALCRL	CGRPR|CRLR	calcitonin receptor-like	protein-coding
chr7	134595183	134595601	267	NA	intron (NM_033140, intron 1 of 11)	(CA)n|Simple_repeat|Simple_repeat	19241	NM_033140	800	Hs.490203	XM_005250609	ENSG00000122786	CALD1	CDM|H-CAD|HCAD|L-CAD|LCAD|NAG22	caldesmon 1	protein-coding
chr2	47442895	47443380	803	NA	intron (NR_110207, intron 2 of 2)	intron (NR_110207, intron 2 of 2)	-39397	NM_001743	805	Hs.468442	XM_005264576	ENSG00000143933	CALM2	CAMII|PHKD|PHKD2	calmodulin 2 (phosphorylase kinase, delta)	protein-coding
chr19	47106394	47106806	274	NA	intron (NM_005184, intron 1 of 5)	intron (NM_005184, intron 1 of 5)	2088	NM_005184	808	Hs.515487	XM_005259279	ENSG00000160014	CALM3	PHKD|PHKD3	calmodulin 3 (phosphorylase kinase, delta)	protein-coding
chr10	5589914	5591105	141	NA	Intergenic	MIR|SINE|MIR	23585	NM_005185	810	Hs.239600	XM_005252613	ENSG00000178363	CALML3	CLP	calmodulin-like 3	protein-coding
chr10	5589914	5591105	111	NA	Intergenic	MIR|SINE|MIR	23585	NM_005185	810	Hs.239600	XM_005252613	ENSG00000178363	CALML3	CLP	calmodulin-like 3	protein-coding
chr10	5589914	5591105	101	NA	Intergenic	MIR|SINE|MIR	23585	NM_005185	810	Hs.239600	XM_005252613	ENSG00000178363	CALML3	CLP	calmodulin-like 3	protein-coding
chr10	5588838	5589109	94	NA	Intergenic	Intergenic	22049	NM_005185	810	Hs.239600	XM_005252613	ENSG00000178363	CALML3	CLP	calmodulin-like 3	protein-coding
chr15	68497546	68497817	126	NA	exon (NM_033429, exon 1 of 5)	exon (NM_033429, exon 1 of 5)	767	NR_104583	91860	Hs.709550	XM_005254777		CALML4	NY-BR-20	calmodulin-like 4	protein-coding
chr10	5530190	5531036	83	NA	Intergenic	Intergenic	10920	NM_017422	51806	Hs.180142	NM_017422	ENSG00000178372	CALML5	CLSP	calmodulin-like 5	protein-coding
chr10	5530190	5531036	62	NA	Intergenic	Intergenic	10920	NM_017422	51806	Hs.180142	NM_017422	ENSG00000178372	CALML5	CLSP	calmodulin-like 5	protein-coding
chr10	5546081	5546305	60	NA	Intergenic	MIR|SINE|MIR	-4660	NM_017422	51806	Hs.180142	NM_017422	ENSG00000178372	CALML5	CLSP	calmodulin-like 5	protein-coding
chr10	5545487	5545737	58	NA	Intergenic	Intergenic	-4079	NM_017422	51806	Hs.180142	NM_017422	ENSG00000178372	CALML5	CLSP	calmodulin-like 5	protein-coding
chr10	5530190	5531036	32	NA	Intergenic	Intergenic	10920	NM_017422	51806	Hs.180142	NM_017422	ENSG00000178372	CALML5	CLSP	calmodulin-like 5	protein-coding
chr4	114562153	114562628	487	NA	intron (NM_172115, intron 3 of 16)	MIRb|SINE|MIR	120693	NM_172127	817	Hs.144114	XM_005263251	ENSG00000145349	CAMK2D	CAMKD	calcium/calmodulin-dependent protein kinase II delta	protein-coding
chr4	114391031	114391587	377	NA	intron (NM_172115, intron 14 of 16)	L2b|LINE|L2	291774	NM_172127	817	Hs.144114	XM_005263251	ENSG00000145349	CAMK2D	CAMKD	calcium/calmodulin-dependent protein kinase II delta	protein-coding
chr10	75631619	75632081	629	NA	intron (NM_172170, intron 2 of 19)	intron (NM_172170, intron 2 of 19)	2499	NM_001222	818	Hs.523045	XM_005270195	ENSG00000148660	CAMK2G	CAMK|CAMK-II|CAMKG	calcium/calmodulin-dependent protein kinase II gamma	protein-coding
chr1	20802952	20803399	372	NA	Intergenic	Intergenic	9553	NM_018584	55450	Hs.731383	NM_018584	ENSG00000162545	CAMK2N1	PRO1489|RP11-401M16.1	calcium/calmodulin-dependent protein kinase II inhibitor 1	protein-coding
chr1	20822905	20823306	210	NA	Intergenic	MSTA|LTR|ERVL-MaLR	-10377	NM_018584	55450	Hs.731383	NM_018584	ENSG00000162545	CAMK2N1	PRO1489|RP11-401M16.1	calcium/calmodulin-dependent protein kinase II inhibitor 1	protein-coding
chr1	20804594	20804938	71	NA	Intergenic	L1MC3|LINE|L1	7962	NM_018584	55450	Hs.731383	NM_018584	ENSG00000162545	CAMK2N1	PRO1489|RP11-401M16.1	calcium/calmodulin-dependent protein kinase II inhibitor 1	protein-coding
chr19	7661160	7661380	188	NA	intron (NM_001080429, intron 1 of 18)	CpG	482	NM_001080429	57662	Hs.17686	XM_005272491	ENSG00000076826	CAMSAP3	KIAA1543|NEZHA	calmodulin regulated spectrin-associated protein family, member 3	protein-coding
chr1	7325904	7326724	981	NA	intron (NM_015215, intron 5 of 22)	intron (NM_015215, intron 5 of 22)	480930	NR_038934	23261	Hs.671020	NM_001195563	ENSG00000171735	CAMTA1	CANPMR	calmodulin binding transcription activator 1	protein-coding
chr1	6867840	6868285	208	NA	intron (NR_038934, intron 1 of 3)	L2b|LINE|L2	22678	NR_038934	23261	Hs.671020	NM_001195563	ENSG00000171735	CAMTA1	CANPMR	calmodulin binding transcription activator 1	protein-coding
chr11	10344403	10345071	1453	NA	intron (NR_103765, intron 1 of 3)	intron (NR_103765, intron 1 of 3)	14877	NR_103765	100130460	Hs.738353	XR_242768		CAND1.11	-	uncharacterized LOC100130460	ncRNA
chr11	10347994	10348385	155	NA	intron (NR_103765, intron 1 of 3)	intron (NR_103765, intron 1 of 3)	18329	NR_103765	100130460	Hs.738353	XR_242768		CAND1.11	-	uncharacterized LOC100130460	ncRNA
chr6	17354922	17355338	310	NA	Intergenic	Intergenic	-38606	NM_006366	10486	Hs.132902	XM_005248801	ENSG00000112186	CAP2	-	CAP, adenylate cyclase-associated protein, 2 (yeast)	protein-coding
chr2	85648516	85649035	230	NA	Intergenic	L2b|LINE|L2	-7578	NM_001256139	822	Hs.516155	XM_005264581	ENSG00000042493	CAPG	AFCP|HEL-S-66|MCP	capping protein (actin filament), gelsolin-like	protein-coding
chr19	39192009	39192420	491	NA	intron (NM_004924, intron 3 of 20)	intron (NM_004924, intron 3 of 20)	42900	NM_144691	147968	Hs.731775	NM_144691	ENSG00000182472	CAPN12	-	calpain 12	protein-coding
chr15	42684773	42685302	240	NA	intron (NM_024344, intron 7 of 22)	intron (NM_024344, intron 7 of 22)	-9551	NM_173088	825	Hs.143261	XM_005254703	ENSG00000092529	CAPN3	CANP3|CANPL3|LGMD2|LGMD2A|nCL-1|p94	calpain 3, (p94)	protein-coding
chr11	76786565	76786808	21	NA	intron (NM_004055, intron 1 of 12)	intron (NM_004055, intron 1 of 12)	8694	NM_004055	726	Hs.248153	XM_005274206	ENSG00000149260	CAPN5	HTRA3|nCL-3	calpain 5	protein-coding
chr1	223842955	223843350	279	NA	intron (NM_001143962, intron 1 of 16)	intron (NM_001143962, intron 1 of 16)	10284	NM_001143962	388743	Hs.291487	NM_001143962		CAPN8	nCL-2	calpain 8	protein-coding
chr1	223853402	223853729	40	NA	promoter-TSS (NM_001143962)	promoter-TSS (NM_001143962)	-129	NM_001143962	388743	Hs.291487	NM_001143962		CAPN8	nCL-2	calpain 8	protein-coding
chr19	36623281	36623654	63	NA	Intergenic	Intergenic	-7451	NM_001003962	826	Hs.515371	XM_005259295	ENSG00000126247	CAPNS1	30K|CALPAIN4|CANP|CANPS|CAPN4|CDPS|CSS1	calpain, small subunit 1	protein-coding
chr7	116449577	116450148	876	NA	Intergenic	Intergenic	-52701	NM_006136	830	Hs.446123	XR_242266		CAPZA2	CAPPA2|CAPZ	capping protein (actin filament) muscle Z-line, alpha 2	protein-coding
chr7	116450498	116451135	131	NA	Intergenic	Intergenic	-51747	NM_006136	830	Hs.446123	XR_242266		CAPZA2	CAPPA2|CAPZ	capping protein (actin filament) muscle Z-line, alpha 2	protein-coding
chr7	116450498	116451135	96	NA	Intergenic	Intergenic	-51747	NM_006136	830	Hs.446123	XR_242266		CAPZA2	CAPPA2|CAPZ	capping protein (actin filament) muscle Z-line, alpha 2	protein-coding
chr1	19752217	19752530	176	NA	intron (NM_004930, intron 1 of 8)	intron (NM_004930, intron 1 of 8)	58828	NM_001282162	832	Hs.432760	NM_001206540	ENSG00000077549	CAPZB	CAPB|CAPPB|CAPZ	capping protein (actin filament) muscle Z-line, beta	protein-coding
chr7	3038337	3039190	243	NA	intron (NM_032415, intron 1 of 24)	7SK|RNA|RNA	44816	NM_032415	84433	Hs.648101	XM_005249890	ENSG00000198286	CARD11	BENTA|BIMP3|CARMA1|IMD11|PPBL	caspase recruitment domain family, member 11	protein-coding
chr7	3038337	3039190	41	NA	intron (NM_032415, intron 1 of 24)	7SK|RNA|RNA	44816	NM_032415	84433	Hs.648101	XM_005249890	ENSG00000198286	CARD11	BENTA|BIMP3|CARMA1|IMD11|PPBL	caspase recruitment domain family, member 11	protein-coding
chr11	105073577	105074114	723	NA	Intergenic	X3_LINE|LINE|RTE-BovB	-63384	NM_021571	59082	Hs.56279	NM_021571	ENSG00000255501	CARD18	ICEBERG|UNQ5804|pseudo-ICE	caspase recruitment domain family, member 18	protein-coding
chr16	8957256	8957804	497	NA	intron (NM_001278260, intron 1 of 4)	intron (NM_001278260, intron 1 of 4)	-1863	NM_001278266	23589	Hs.632184	XM_005255228	ENSG00000153048	CARHSP1	CRHSP-24|CSDC1	calcium regulated heat stable protein 1, 24kDa	protein-coding
chr19	10989651	10990132	440	NA	intron (NM_199141, intron 1 of 15)	MLT1J|LTR|ERVL-MaLR	7638	NM_199141	10498	Hs.323213	XM_005259708	ENSG00000142453	CARM1	PRMT4	coactivator-associated arginine methyltransferase 1	protein-coding
chr16	52612257	52612585	262	NA	intron (NR_033920, intron 2 of 3)	intron (NR_033920, intron 2 of 3)	28466	NR_033920	643714	Hs.662199	XR_243421	ENSG00000249231	CASC16	LINC00918|RP11-297L17.1	cancer susceptibility candidate 16 (non-protein coding)	ncRNA
chr17	69107468	69107930	224	NA	intron (NR_104152, intron 3 of 3)	intron (NR_104152, intron 3 of 3)	90621	NR_104152	101928165	Hs.407613	XR_243749	ENSG00000260785	CASC17	LINC00600|RP11-879D6.1	cancer susceptibility candidate 17 (non-protein coding)	ncRNA
chr17	68867592	68867922	117	NA	Intergenic	Intergenic	330563	NR_104152	101928165	Hs.407613	XR_243749	ENSG00000260785	CASC17	LINC00600|RP11-879D6.1	cancer susceptibility candidate 17 (non-protein coding)	ncRNA
chr17	69094283	69095004	112	NA	non-coding (NR_104152, exon 4 of 4)	non-coding (NR_104152, exon 4 of 4)	103677	NR_104152	101928165	Hs.407613	XR_243749	ENSG00000260785	CASC17	LINC00600|RP11-879D6.1	cancer susceptibility candidate 17 (non-protein coding)	ncRNA
chr17	69166333	69166554	50	NA	intron (NR_104152, intron 2 of 3)	intron (NR_104152, intron 2 of 3)	31877	NR_104152	101928165	Hs.407613	XR_243749	ENSG00000260785	CASC17	LINC00600|RP11-879D6.1	cancer susceptibility candidate 17 (non-protein coding)	ncRNA
chr20	6469971	6470468	174	NA	intron (NR_109953, intron 3 of 3)	intron (NR_109953, intron 3 of 3)	62840	NR_109953	101929244	Hs.542488	XR_244237	ENSG00000229876	CASC20	RP11-199O14.1	cancer susceptibility candidate 20 (non-protein coding)	ncRNA
chr17	38290554	38290819	102	NA	3' UTR (NM_001012241, exon 10 of 10)	3' UTR (NM_001012241, exon 10 of 10)	-5821	NM_007359	22794	Hs.743287	XM_005257163	ENSG00000108349	CASC3	BTZ|MLN51	cancer susceptibility candidate 3	protein-coding
chr15	40885845	40886587	1161	NA	promoter-TSS (NM_170589)	promoter-TSS (NM_170589)	-231	NM_170589	57082	Hs.181855	NM_144508	ENSG00000137812	CASC5	AF15Q14|CT29|D40|KNL1|PPP1R55|Spc7|hKNL-1|hSpc105	cancer susceptibility candidate 5	protein-coding
chr8	128582316	128583027	1047	NA	Intergenic	Intergenic	-88287	NR_024393	727677	Hs.736625	NR_024393	ENSG00000246228	CASC8	LINC00860|RP11-382A18.1	cancer susceptibility candidate 8 (non-protein coding)	ncRNA
chr8	128608460	128608785	285	NA	Intergenic	MLT1J2|LTR|ERVL-MaLR	-114238	NR_024393	727677	Hs.736625	NR_024393	ENSG00000246228	CASC8	LINC00860|RP11-382A18.1	cancer susceptibility candidate 8 (non-protein coding)	ncRNA
chr8	128598520	128598769	164	NA	Intergenic	Intergenic	-104260	NR_024393	727677	Hs.736625	NR_024393	ENSG00000246228	CASC8	LINC00860|RP11-382A18.1	cancer susceptibility candidate 8 (non-protein coding)	ncRNA
chr8	128464350	128464578	65	NA	intron (NR_024393, intron 4 of 4)	intron (NR_024393, intron 4 of 4)	29920	NR_024393	727677	Hs.736625	NR_024393	ENSG00000246228	CASC8	LINC00860|RP11-382A18.1	cancer susceptibility candidate 8 (non-protein coding)	ncRNA
chr7	94189263	94189671	561	NA	Intergenic	Intergenic	50297	NM_022900	64921	Hs.260041	XM_005250542	ENSG00000127995	CASD1	C7orf12|NBLA04196	CAS1 domain containing 1	protein-coding
chrX	41932803	41933082	80	NA	Intergenic	Intergenic	-150655	NM_001126054	8573	Hs.495984	XM_005272685	ENSG00000147044	CASK	CAGH39|CAMGUK|CMG|FGS4|LIN2|MICPCH|MRXSNA|TNRC8	calcium/calmodulin-dependent serine protein kinase (MAGUK family)	protein-coding
chrX	41887033	41887292	71	NA	Intergenic	Intergenic	-104875	NM_001126054	8573	Hs.495984	XM_005272685	ENSG00000147044	CASK	CAGH39|CAMGUK|CMG|FGS4|LIN2|MICPCH|MRXSNA|TNRC8	calcium/calmodulin-dependent serine protein kinase (MAGUK family)	protein-coding
chrX	41730045	41730258	41	NA	intron (NM_001126054, intron 1 of 25)	MLT1E3|LTR|ERVL-MaLR	52136	NM_001126055	8573	Hs.495984	XM_005272685	ENSG00000147044	CASK	CAGH39|CAMGUK|CMG|FGS4|LIN2|MICPCH|MRXSNA|TNRC8	calcium/calmodulin-dependent serine protein kinase (MAGUK family)	protein-coding
chrX	42202304	42202509	41	NA	Intergenic	L1PA7|LINE|L1	-420119	NM_001126054	8573	Hs.495984	XM_005272685	ENSG00000147044	CASK	CAGH39|CAMGUK|CMG|FGS4|LIN2|MICPCH|MRXSNA|TNRC8	calcium/calmodulin-dependent serine protein kinase (MAGUK family)	protein-coding
chr1	116304436	116304906	338	NA	intron (NM_001232, intron 1 of 10)	X3_LINE|LINE|RTE-BovB	6755	NM_001232	845	Hs.57975	XM_005271275	ENSG00000118729	CASQ2	PDIB2	calsequestrin 2 (cardiac muscle)	protein-coding
chr5	96069787	96070101	103	NA	intron (NM_001190442, intron 9 of 30)	intron (NM_001190442, intron 9 of 30)	-9300	NR_104285	831	Hs.436186	NM_001042440	ENSG00000153113	CAST	BS-17	calpastatin	protein-coding
chr1	10819529	10820355	617	NA	intron (NM_017766, intron 2 of 15)	intron (NM_017766, intron 2 of 15)	36791	NM_001079843	54897	Hs.439894	XM_005263479	ENSG00000130940	CASZ1	CAS11|CST|SRG|ZNF693|dJ734G22.1	castor zinc finger 1	protein-coding
chr1	10820700	10820927	102	NA	5' UTR (NM_001079843, exon 2 of 21)	5' UTR (NM_001079843, exon 2 of 21)	35920	NM_001079843	54897	Hs.439894	XM_005263479	ENSG00000130940	CASZ1	CAS11|CST|SRG|ZNF693|dJ734G22.1	castor zinc finger 1	protein-coding
chr14	92246851	92247200	217	NA	3' UTR (NM_001128595, exon 12 of 12)	3' UTR (NM_001128595, exon 12 of 12)	-48612	NM_024764	79820	Hs.131755	XM_005268066	ENSG00000133962	CATSPERB	C14orf161|CatSper(beta)	catsper channel auxiliary subunit beta	protein-coding
chr14	92221941	92222250	60	NA	Intergenic	Intergenic	-23682	NM_024764	79820	Hs.131755	XM_005268066	ENSG00000133962	CATSPERB	C14orf161|CatSper(beta)	catsper channel auxiliary subunit beta	protein-coding
chr7	116078430	116078755	363	NA	Intergenic	MIR|SINE|MIR	-61063	NM_001206747	858	Hs.603096	NM_001206747	ENSG00000105971	CAV2	CAV	caveolin 2	protein-coding
chr7	116066404	116067114	94	NA	Intergenic	Intergenic	-72896	NM_001206747	858	Hs.603096	NM_001206747	ENSG00000105971	CAV2	CAV	caveolin 2	protein-coding
chr3	106090779	106091035	149	NA	Intergenic	Intergenic	-503020	NM_170662	868	Hs.430589	XM_005247852	ENSG00000114423	CBLB	Cbl-b|RNF56	Cbl proto-oncogene B, E3 ubiquitin protein ligase	protein-coding
chr3	105982377	105982625	50	NA	Intergenic	L2c|LINE|L2	-394614	NM_170662	868	Hs.430589	XM_005247852	ENSG00000114423	CBLB	Cbl-b|RNF56	Cbl proto-oncogene B, E3 ubiquitin protein ligase	protein-coding
chr19	45279683	45280319	241	NA	Intergenic	Intergenic	-1125	NM_001130852	23624	Hs.466907	XM_005258696	ENSG00000142273	CBLC	CBL-3|CBL-SL|RNF57	Cbl proto-oncogene C, E3 ubiquitin protein ligase	protein-coding
chr19	45281233	45281627	138	NA	exon (NM_001130852, exon 1 of 10)	exon (NM_001130852, exon 1 of 10)	304	NM_012116	23624	Hs.466907	XM_005258696	ENSG00000142273	CBLC	CBL-3|CBL-SL|RNF57	Cbl proto-oncogene C, E3 ubiquitin protein ligase	protein-coding
chr14	24895944	24896528	281	NA	3' UTR (NM_001039771, exon 3 of 3)	3' UTR (NM_001039771, exon 3 of 3)	2495	NM_001039771	643866	Hs.207603	NM_001039771	ENSG00000139899	CBLN3	PRO1486	cerebellin 3 precursor	protein-coding
chr2	114185321	114185694	228	NA	Intergenic	THE1B-int|LTR|ERVL-MaLR	-9761	NM_172003	150472	Hs.531330	XM_005263600	ENSG00000136682	CBWD2	-	COBW domain containing 2	protein-coding
chr9	70846952	70847168	201	NA	Intergenic	THE1B-int|LTR|ERVL-MaLR	-9745	NM_001286836	220869	Hs.645504	XM_005272748	ENSG00000147996	CBWD5	DC36	COBW domain containing 5	protein-coding
chr17	77818692	77819481	571	NA	Intergenic	Intergenic	-5873	NM_003655	8535	Hs.405046	XM_005257753	ENSG00000141582	CBX4	NBP16|PC2	chromobox homolog 4	protein-coding
chr22	39525186	39525385	76	NA	Intergenic	MLT1B|LTR|ERVL-MaLR	23253	NM_175709	23492	Hs.356416	XM_005261413	ENSG00000100307	CBX7	-	chromobox homolog 7	protein-coding
chr8	128230779	128231450	1377	NA	non-coding (NR_108049, exon 1 of 2)	non-coding (NR_108049, exon 1 of 2)	399	NR_108049	100507056	Hs.343864	XR_108886	ENSG00000247844	CCAT1	-	colon cancer associated transcript 1 (non-protein coding)	ncRNA
chr8	128277805	128278325	279	NA	Intergenic	Intergenic	-46552	NR_108049	100507056	Hs.343864	XR_108886	ENSG00000247844	CCAT1	-	colon cancer associated transcript 1 (non-protein coding)	ncRNA
chr8	128234866	128235308	208	NA	Intergenic	Intergenic	-3574	NR_108049	100507056	Hs.343864	XR_108886	ENSG00000247844	CCAT1	-	colon cancer associated transcript 1 (non-protein coding)	ncRNA
chr8	128227232	128227826	199	NA	intron (NR_108049, intron 1 of 1)	intron (NR_108049, intron 1 of 1)	3984	NR_108049	100507056	Hs.343864	XR_108886	ENSG00000247844	CCAT1	-	colon cancer associated transcript 1 (non-protein coding)	ncRNA
chr8	128222660	128223041	133	NA	intron (NR_108049, intron 1 of 1)	intron (NR_108049, intron 1 of 1)	8663	NR_108049	100507056	Hs.343864	XR_108886	ENSG00000247844	CCAT1	-	colon cancer associated transcript 1 (non-protein coding)	ncRNA
chr8	128413244	128413624	25	NA	non-coding (NR_109834, exon 1 of 1)	non-coding (NR_109834, exon 1 of 1)	790	NR_109834	101805488	Hs.745578	NR_109834		CCAT2	LINC00873|NCCP1	colon cancer associated transcript 2 (non-protein coding)	ncRNA
chr9	131638166	131638500	249	NA	intron (NM_001287390, intron 1 of 14)	intron (NM_001287390, intron 1 of 14)	6021	NM_001287390	883	Hs.495250	XM_005252294	ENSG00000171097	CCBL1	GTK|KAT1|KATI	cysteine conjugate-beta lyase, cytoplasmic	protein-coding
chr2	55751986	55752322	195	NA	intron (NM_001282761, intron 4 of 10)	MIR|SINE|MIR	5423	NM_001282761	112942	Hs.264208	XM_005264119	ENSG00000163001	CCDC104	-	coiled-coil domain containing 104	protein-coding
chr2	219907487	219907897	444	NA	Intergenic	Intergenic	-1419	NM_001278296	255101	Hs.147762	XM_005246442	ENSG00000181378	CCDC108	-	coiled-coil domain containing 108	protein-coding
chr5	114750787	114751033	38	NA	Intergenic	Intergenic	-118452	NM_001040440	153733	Hs.436121	XM_005271908	ENSG00000164221	CCDC112	MBC1	coiled-coil domain containing 112	protein-coding
chr19	18026867	18027097	129	NA	Intergenic	AluSx|SINE|Alu	-16842	NM_001136203	115098	Hs.100043	NM_001136203	ENSG00000007080	CCDC124	-	coiled-coil domain containing 124	protein-coding
chr19	18029912	18030354	62	NA	Intergenic	SVA_D|Other|Other	-13691	NM_001136203	115098	Hs.100043	NM_001136203	ENSG00000007080	CCDC124	-	coiled-coil domain containing 124	protein-coding
chr7	31533949	31534244	102	NA	Intergenic	Intergenic	-19589	NM_001257967	223075	Hs.224269	XM_005249661	ENSG00000180347	CCDC129	-	coiled-coil domain containing 129	protein-coding
chr3	42797596	42798219	587	NA	intron (NM_144719, intron 3 of 15)	intron (NM_144719, intron 3 of 15)	16838	NM_144719	152206	Hs.604182	XM_005264898	ENSG00000244607	CCDC13	-	coiled-coil domain containing 13	protein-coding
chr2	222904512	222904911	188	NA	Intergenic	Intergenic	-258155	NM_153038	151278	Hs.350729	NM_153038	ENSG00000163081	CCDC140	-	coiled-coil domain containing 140	protein-coding
chr2	179972505	179972823	158	NA	3' UTR (NM_178123, exon 18 of 18)	3' UTR (NM_178123, exon 18 of 18)	-57878	NM_173648	285025	Hs.324341	XM_005246473	ENSG00000163492	CCDC141	CAMDI	coiled-coil domain containing 141	protein-coding
chr7	76751454	76751834	198	NA	promoter-TSS (NM_020879)	promoter-TSS (NM_020879)	-290	NM_020879	57639	Hs.113940	XM_005250512	ENSG00000135205	CCDC146	-	coiled-coil domain containing 146	protein-coding
chr6	109639284	109639863	318	NA	Intergenic	Intergenic	24067	NR_028595	221262	Hs.723571	NR_028595	ENSG00000203799	CCDC162P	C6orf184|C6orf185|CCDC162|bA425D10.3|bA425D10.7	coiled-coil domain containing 162, pseudogene	pseudo
chr6	109654093	109654392	75	NA	Intergenic	Intergenic	38736	NR_028595	221262	Hs.723571	NR_028595	ENSG00000203799	CCDC162P	C6orf184|C6orf185|CCDC162|bA425D10.3|bA425D10.7	coiled-coil domain containing 162, pseudogene	pseudo
chr1	45965597	45965909	84	NA	promoter-TSS (NM_015506)	promoter-TSS (NM_015506)	-2	NR_033296	126661	Hs.461300	NM_001102601	ENSG00000236624	CCDC163P	C1orf231	coiled-coil domain containing 163, pseudogene	pseudo
chr11	23134616	23134925	32	NA	Intergenic	LTR18B|LTR|ERVL	-252798	NM_001195637	100500938	Hs.555029	NM_001195637	ENSG00000255359	CCDC179	-	coiled-coil domain containing 179	protein-coding
chr11	27313683	27314533	148	NA	Intergenic	Intergenic	70687	NM_030771	91057	Hs.143733	NM_030771	ENSG00000109881	CCDC34	NY-REN-41|RAMA3	coiled-coil domain containing 34	protein-coding
chr11	27410353	27410877	145	NA	intron (NM_018490, intron 4 of 17)	intron (NM_018490, intron 4 of 17)	-25820	NM_080654	91057	Hs.143733	NM_030771	ENSG00000109881	CCDC34	NY-REN-41|RAMA3	coiled-coil domain containing 34	protein-coding
chr11	27313683	27314533	95	NA	Intergenic	Intergenic	70687	NM_030771	91057	Hs.143733	NM_030771	ENSG00000109881	CCDC34	NY-REN-41|RAMA3	coiled-coil domain containing 34	protein-coding
chr11	27414398	27414608	73	NA	intron (NM_018490, intron 2 of 17)	intron (NM_018490, intron 2 of 17)	-29708	NM_080654	91057	Hs.143733	NM_030771	ENSG00000109881	CCDC34	NY-REN-41|RAMA3	coiled-coil domain containing 34	protein-coding
chr3	122084281	122084866	809	NA	intron (NM_001017928, intron 3 of 4)	intron (NM_001017928, intron 3 of 4)	17501	NM_001017928	131076	Hs.220594	XM_005247108	ENSG00000160124	CCDC58	-	coiled-coil domain containing 58	protein-coding
chr3	122085235	122085639	112	NA	intron (NM_001017928, intron 3 of 4)	intron (NM_001017928, intron 3 of 4)	16637	NM_001017928	131076	Hs.220594	XM_005247108	ENSG00000160124	CCDC58	-	coiled-coil domain containing 58	protein-coding
chr3	49203730	49204012	102	NA	promoter-TSS (NM_022903)	promoter-TSS (NM_022903)	-86	NM_022903	64925	Hs.211472	NM_022903	ENSG00000177352	CCDC71	-	coiled-coil domain containing 71	protein-coding
chr11	32728332	32728978	326	NA	intron (NM_001008391, intron 3 of 17)	intron (NM_001008391, intron 3 of 17)	87549	NM_001008391	493860	Hs.706808	NM_001008391	ENSG00000186714	CCDC73	NY-SAR-79	coiled-coil domain containing 73	protein-coding
chr3	112390872	112391318	95	NA	Intergenic	L2b|LINE|L2	-31105	NM_199511	151887	Hs.477128	XM_005247135	ENSG00000091986	CCDC80	DRO1|SSG1|URB|okuribin	coiled-coil domain containing 80	protein-coding
chr3	112376417	112376958	78	NA	Intergenic	L1PA16|LINE|L1	-16697	NM_199511	151887	Hs.477128	XM_005247135	ENSG00000091986	CCDC80	DRO1|SSG1|URB|okuribin	coiled-coil domain containing 80	protein-coding
chr11	86219557	86220585	1750	NA	intron (NM_001161586, intron 4 of 14)	MER115|DNA|hAT-Tip100	134293	NM_021827	60494	Hs.144913	XM_005274161	ENSG00000149201	CCDC81	-	coiled-coil domain containing 81	protein-coding
chr11	86222049	86222656	734	NA	intron (NM_001161586, intron 4 of 14)	L2c|LINE|L2	136574	NM_021827	60494	Hs.144913	XM_005274161	ENSG00000149201	CCDC81	-	coiled-coil domain containing 81	protein-coding
chr11	86187160	86187768	257	NA	intron (NM_001161586, intron 7 of 14)	intron (NM_001161586, intron 7 of 14)	101686	NM_021827	60494	Hs.144913	XM_005274161	ENSG00000149201	CCDC81	-	coiled-coil domain containing 81	protein-coding
chr11	86210851	86211168	131	NA	intron (NM_001161586, intron 5 of 14)	MIRc|SINE|MIR	125231	NM_021827	60494	Hs.144913	XM_005274161	ENSG00000149201	CCDC81	-	coiled-coil domain containing 81	protein-coding
chr11	86220820	86221167	112	NA	intron (NM_001161586, intron 4 of 14)	intron (NM_001161586, intron 4 of 14)	135215	NM_021827	60494	Hs.144913	XM_005274161	ENSG00000149201	CCDC81	-	coiled-coil domain containing 81	protein-coding
chr2	56471913	56472388	277	NA	intron (NM_001080433, intron 2 of 5)	L1MA3|LINE|L1	60892	NM_001080433	114800	Hs.117136	XM_005264122	ENSG00000055813	CCDC85A	-	coiled-coil domain containing 85A	protein-coding
chr2	56671262	56671675	146	NA	Intergenic	Intergenic	260210	NM_001080433	114800	Hs.117136	XM_005264122	ENSG00000055813	CCDC85A	-	coiled-coil domain containing 85A	protein-coding
chr14	100018898	100019513	1050	NA	intron (NM_001144995, intron 1 of 5)	intron (NM_001144995, intron 1 of 5)	51522	NM_001144995	317762	Hs.709288	NM_001144995	ENSG00000205476	CCDC85C	-	coiled-coil domain containing 85C	protein-coding
chr11	82997086	82997498	548	NA	5' UTR (NM_001286120, exon 1 of 7)	5' UTR (NM_001286120, exon 1 of 7)	158	NM_001286117	60492	Hs.368866	XM_005274151	ENSG00000137500	CCDC90B	MDS011|MDS025	coiled-coil domain containing 90B	protein-coding
chr2	118771736	118772322	188	NA	promoter-TSS (NM_019044)	promoter-TSS (NM_019044)	-290	NM_019044	54520	Hs.107845	XM_005263694	ENSG00000125633	CCDC93	-	coiled-coil domain containing 93	protein-coding
chr3	42329862	42330181	141	NA	Intergenic	Intergenic	-22359	NM_000729	885	Hs.458426	XM_005265527	ENSG00000187094	CCK	-	cholecystokinin	protein-coding
chr3	42297903	42298126	67	NA	Intergenic	Intergenic	7425	NM_001174138	885	Hs.458426	XM_005265527	ENSG00000187094	CCK	-	cholecystokinin	protein-coding
chr17	34329025	34329230	93	NA	promoter-TSS (NM_032965)	promoter-TSS (NM_032965)	-43	NR_027921	348249	Hs.272493	NR_027921		CCL15-CCL14	-	CCL15-CCL14 readthrough (NMD candidate)	ncRNA
chr2	228686104	228686754	1010	NA	Intergenic	Intergenic	7871	NM_001130046	6364	Hs.75498	NM_001130046	ENSG00000115009	CCL20	CKb4|LARC|MIP-3-alpha|MIP-3a|MIP3A|SCYA20|ST38	chemokine (C-C motif) ligand 20	protein-coding
chr2	228678118	228678436	115	NA	promoter-TSS (NM_004591)	promoter-TSS (NM_004591)	-281	NM_004591	6364	Hs.75498	NM_001130046	ENSG00000115009	CCL20	CKb4|LARC|MIP-3-alpha|MIP-3a|MIP3A|SCYA20|ST38	chemokine (C-C motif) ligand 20	protein-coding
chr2	228683595	228683845	114	NA	Intergenic	Intergenic	5162	NM_001130046	6364	Hs.75498	NM_001130046	ENSG00000115009	CCL20	CKb4|LARC|MIP-3-alpha|MIP-3a|MIP3A|SCYA20|ST38	chemokine (C-C motif) ligand 20	protein-coding
chr2	228682904	228683125	35	NA	TTS (NM_004591)	TTS (NM_004591)	4456	NM_001130046	6364	Hs.75498	NM_001130046	ENSG00000115009	CCL20	CKb4|LARC|MIP-3-alpha|MIP-3a|MIP3A|SCYA20|ST38	chemokine (C-C motif) ligand 20	protein-coding
chr9	34664367	34664566	163	NA	Intergenic	Intergenic	-1777	NM_006664	10850	Hs.648124	NM_006664	ENSG00000213927	CCL27	ALP|CTACK|CTAK|ESKINE|ILC|PESKY|SCYA27	chemokine (C-C motif) ligand 27	protein-coding
chr11	69294275	69295047	2084	NA	Intergenic	Intergenic	-161212	NM_053056	595	Hs.523852	NM_053056	ENSG00000110092	CCND1	BCL1|D11S287E|PRAD1|U21B31	cyclin D1	protein-coding
chr11	69274623	69274962	344	NA	Intergenic	L1MEf|LINE|L1	-181081	NM_053056	595	Hs.523852	NM_053056	ENSG00000110092	CCND1	BCL1|D11S287E|PRAD1|U21B31	cyclin D1	protein-coding
chr11	69275327	69275872	201	NA	Intergenic	MLT1D-int|LTR|ERVL-MaLR	-180274	NM_053056	595	Hs.523852	NM_053056	ENSG00000110092	CCND1	BCL1|D11S287E|PRAD1|U21B31	cyclin D1	protein-coding
chr11	69416204	69416547	116	NA	Intergenic	Intergenic	-39498	NM_053056	595	Hs.523852	NM_053056	ENSG00000110092	CCND1	BCL1|D11S287E|PRAD1|U21B31	cyclin D1	protein-coding
chr11	69452851	69453182	108	NA	Intergenic	CpG	-2857	NM_053056	595	Hs.523852	NM_053056	ENSG00000110092	CCND1	BCL1|D11S287E|PRAD1|U21B31	cyclin D1	protein-coding
chr11	69311691	69312317	71	NA	Intergenic	Intergenic	-143869	NM_053056	595	Hs.523852	NM_053056	ENSG00000110092	CCND1	BCL1|D11S287E|PRAD1|U21B31	cyclin D1	protein-coding
chr11	69469287	69470036	61	NA	TTS (NM_053056)	TTS (NM_053056)	13788	NM_053056	595	Hs.523852	NM_053056	ENSG00000110092	CCND1	BCL1|D11S287E|PRAD1|U21B31	cyclin D1	protein-coding
chr11	69335293	69335603	49	NA	Intergenic	Intergenic	-120425	NM_053056	595	Hs.523852	NM_053056	ENSG00000110092	CCND1	BCL1|D11S287E|PRAD1|U21B31	cyclin D1	protein-coding
chr11	69469287	69470036	38	NA	TTS (NM_053056)	TTS (NM_053056)	13788	NM_053056	595	Hs.523852	NM_053056	ENSG00000110092	CCND1	BCL1|D11S287E|PRAD1|U21B31	cyclin D1	protein-coding
chr11	69311691	69312317	26	NA	Intergenic	Intergenic	-143869	NM_053056	595	Hs.523852	NM_053056	ENSG00000110092	CCND1	BCL1|D11S287E|PRAD1|U21B31	cyclin D1	protein-coding
chr12	4385965	4386415	286	NA	intron (NM_001759, intron 2 of 4)	intron (NM_001759, intron 2 of 4)	3288	NM_001759	894	Hs.376071	XM_005253813	ENSG00000118971	CCND2	KIAK0002	cyclin D2	protein-coding
chr6	41964855	41965200	167	NA	intron (NM_001136017, intron 1 of 4)	intron (NM_001136017, intron 1 of 4)	51605	NM_001136126	896	Hs.534307	XM_005249463	ENSG00000112576	CCND3	-	cyclin D3	protein-coding
chr6	41935368	41935702	26	NA	intron (NM_001136017, intron 1 of 4)	intron (NM_001136017, intron 1 of 4)	-25949	NM_001136125	896	Hs.534307	XM_005249463	ENSG00000112576	CCND3	-	cyclin D3	protein-coding
chr6	41935368	41935702	21	NA	intron (NM_001136017, intron 1 of 4)	intron (NM_001136017, intron 1 of 4)	-25949	NM_001136125	896	Hs.534307	XM_005249463	ENSG00000112576	CCND3	-	cyclin D3	protein-coding
chr8	95918629	95918957	193	NA	Intergenic	Intergenic	-11311	NM_057749	9134	Hs.521693	XM_005251095	ENSG00000175305	CCNE2	CYCE2	cyclin E2	protein-coding
chr4	78185114	78185558	268	NA	Intergenic	MER11A|LTR|ERVK	106979	NM_004354	901	Hs.740456	XM_005263336	ENSG00000138764	CCNG2	-	cyclin G2	protein-coding
chr3	156878528	156878786	63	NA	promoter-TSS (NM_020307)	promoter-TSS (NM_020307)	-175	NM_020307	57018	Hs.4859	XM_005247647		CCNL1	ANIA6A|PRO1073|ania-6a	cyclin L1	protein-coding
chr10	35653699	35654302	926	NA	intron (NM_001282852, intron 1 of 8)	intron (NM_001282852, intron 1 of 8)	28198	NM_001282853	219771	Hs.714184	XM_005252387	ENSG00000108100	CCNY	C10orf9|CBCP1|CCNX|CFP1	cyclin Y	protein-coding
chr6	167536107	167536633	477	NA	5' UTR (NM_031409, exon 1 of 3)	5' UTR (NM_031409, exon 1 of 3)	129	NM_031409	1235	Hs.46468	XR_245500	ENSG00000112486	CCR6	BN-1|C-C CKR-6|CC-CKR-6|CCR-6|CD196|CKR-L3|CKRL3|CMKBR6|DCR2|DRY6|GPR29|GPRCY4|STRL22	chemokine (C-C motif) receptor 6	protein-coding
chr6	167536107	167536633	40	NA	5' UTR (NM_031409, exon 1 of 3)	5' UTR (NM_031409, exon 1 of 3)	129	NM_031409	1235	Hs.46468	XR_245500	ENSG00000112486	CCR6	BN-1|C-C CKR-6|CC-CKR-6|CCR-6|CD196|CKR-L3|CKRL3|CMKBR6|DCR2|DRY6|GPR29|GPRCY4|STRL22	chemokine (C-C motif) receptor 6	protein-coding
chr3	46448461	46448990	84	NA	promoter-TSS (NM_003965)	promoter-TSS (NM_003965)	4	NM_003965	9034	Hs.535713	XM_005265531	ENSG00000121797	CCRL2	ACKR5|CKRX|CRAM|CRAM-A|CRAM-B|HCR	chemokine (C-C motif) receptor-like 2	protein-coding
chr4	139932454	139932733	93	NA	Intergenic	Intergenic	-4320	NM_012118	25819	Hs.656047	NM_012118	ENSG00000151014	CCRN4L	CCR4L|NOC	CCR4 carbon catabolite repression 4-like (S. cerevisiae)	protein-coding
chr4	91104323	91104877	527	NA	intron (NM_001145065, intron 1 of 10)	intron (NM_001145065, intron 1 of 10)	-51582	NM_207491	401145	Hs.654735	NM_001145065	ENSG00000184305	CCSER1	FAM190A	coiled-coil serine-rich protein 1	protein-coding
chr4	91167878	91168281	110	NA	intron (NM_207491, intron 1 of 7)	Tigger7|DNA|TcMar-Tigger	11897	NM_207491	401145	Hs.654735	NM_001145065	ENSG00000184305	CCSER1	FAM190A	coiled-coil serine-rich protein 1	protein-coding
chr4	91095984	91096246	71	NA	intron (NM_001145065, intron 1 of 10)	L1ME1|LINE|L1	47431	NM_001145065	401145	Hs.654735	NM_001145065	ENSG00000184305	CCSER1	FAM190A	coiled-coil serine-rich protein 1	protein-coding
chr4	91107489	91107714	40	NA	intron (NM_001145065, intron 1 of 10)	intron (NM_001145065, intron 1 of 10)	-48581	NM_207491	401145	Hs.654735	NM_001145065	ENSG00000184305	CCSER1	FAM190A	coiled-coil serine-rich protein 1	protein-coding
chr5	10272934	10273319	50	NA	Intergenic	MER50|LTR|ERV1	22844	NM_012073	22948	Hs.1600	XM_005248265	ENSG00000150753	CCT5	CCT-epsilon|CCTE|HEL-S-69|TCP-1-epsilon	chaperonin containing TCP1, subunit 5 (epsilon)	protein-coding
chr6	75129864	75130268	162	NA	Intergenic	L1MA2|LINE|L1	724552	NM_133493	135228	Hs.399891	XM_005248659	ENSG00000156535	CD109	CPAMD7|RP11-525G3.1	CD109 molecule	protein-coding
chr3	112040848	112041260	65	NA	Intergenic	MER61F|LTR|ERV1	-10862	NM_001004196	4345	Hs.79015	XM_005247481	ENSG00000091972	CD200	MOX1|MOX2|MRC|OX-2	CD200 molecule	protein-coding
chr1	167501580	167501929	108	NA	Intergenic	MIRb|SINE|MIR	-13907	NM_000734	919	Hs.156445	XM_005245596	ENSG00000198821	CD247	CD3-ZETA|CD3H|CD3Q|CD3Z|T3Z|TCRZ	CD247 molecule	protein-coding
chr6	47371506	47372148	677	NA	Intergenic	Intergenic	-73698	NM_012120	23607	Hs.485518	XM_005248976	ENSG00000198087	CD2AP	CMS	CD2-associated protein	protein-coding
chr6	47372813	47373367	217	NA	Intergenic	L2c|LINE|L2	-72435	NM_012120	23607	Hs.485518	XM_005248976	ENSG00000198087	CD2AP	CMS	CD2-associated protein	protein-coding
chr6	47487899	47488297	173	NA	intron (NM_012120, intron 2 of 17)	MIR3|SINE|MIR	42573	NM_012120	23607	Hs.485518	XM_005248976	ENSG00000198087	CD2AP	CMS	CD2-associated protein	protein-coding
chr6	47427990	47428234	26	NA	Intergenic	Intergenic	-17413	NM_012120	23607	Hs.485518	XM_005248976	ENSG00000198087	CD2AP	CMS	CD2-associated protein	protein-coding
chr16	30366565	30367290	80	NA	promoter-TSS (NM_001243646)	promoter-TSS (NM_001243646)	-245	NM_006110	10421	Hs.202677	NM_001243646	ENSG00000169217	CD2BP2	FWP010|LIN1|PPP1R59|Snu40|U5-52K	CD2 (cytoplasmic tail) binding protein 2	protein-coding
chr16	30366565	30367290	71	NA	promoter-TSS (NM_001243646)	promoter-TSS (NM_001243646)	-245	NM_006110	10421	Hs.202677	NM_001243646	ENSG00000169217	CD2BP2	FWP010|LIN1|PPP1R59|Snu40|U5-52K	CD2 (cytoplasmic tail) binding protein 2	protein-coding
chr17	72711343	72711693	137	NA	intron (NM_175738, intron 1 of 8)	intron (NM_175738, intron 1 of 8)	-2379	NM_001289087	146722	Hs.567706	XM_005257069	ENSG00000186074	CD300LF	CD300f|CLM-1|CLM1|IREM-1|IREM1|IgSF13|LMIR3|NKIR	CD300 molecule-like family member f	protein-coding
chr7	80241315	80241534	83	NA	intron (NM_001001547, intron 1 of 13)	intron (NM_001001547, intron 1 of 13)	9920	NM_001001547	948	Hs.120949	XM_005250713	ENSG00000135218	CD36	BDPLT10|CHDS7|FAT|GP3B|GP4|GPIV|PASIV|SCARB3	CD36 molecule (thrombospondin receptor)	protein-coding
chr11	118161512	118161964	355	NA	Intergenic	Intergenic	-13557	NM_000733	916	Hs.3003	NM_000733	ENSG00000198851	CD3E	T3E|TCRE	CD3e molecule, epsilon (CD3-TCR complex)	protein-coding
chr11	118192158	118192522	95	NA	Intergenic	Intergenic	17045	NM_000733	916	Hs.3003	NM_000733	ENSG00000198851	CD3E	T3E|TCRE	CD3e molecule, epsilon (CD3-TCR complex)	protein-coding
chr11	35069878	35070231	102	NA	Intergenic	THE1A-int|LTR|ERVL-MaLR	-90363	NM_001202557	960	Hs.502328	XM_005253231	ENSG00000026508	CD44	CDW44|CSPG8|ECMR-III|HCELL|HUTCH-I|IN|LHR|MC56|MDU2|MDU3|MIC4|Pgp1	CD44 molecule (Indian blood group)	protein-coding
chr3	107724998	107725475	221	NA	Intergenic	Intergenic	84699	NM_198793	961	Hs.446414	XM_005247908	ENSG00000196776	CD47	IAP|MER6|OA3	CD47 molecule	protein-coding
chr1	117051279	117052199	341	NA	Intergenic	MamGypLTR1d|LTR|Gypsy	61976	NR_026665	965	Hs.34341	NM_001144822	ENSG00000116815	CD58	LFA-3|LFA3|ag3	CD58 molecule	protein-coding
chr1	117139521	117139918	75	NA	intron (NM_001542, intron 7 of 10)	intron (NM_001542, intron 7 of 10)	-26004	NM_001144822	965	Hs.34341	NM_001144822	ENSG00000116815	CD58	LFA-3|LFA3|ag3	CD58 molecule	protein-coding
chr11	60764155	60764682	174	NA	intron (NM_001254750, intron 1 of 10)	MIRb|SINE|MIR	25305	NM_001254750	923	Hs.744366	NM_001254750	ENSG00000013725	CD6	TP120	CD6 molecule	protein-coding
chr17	80253347	80253878	154	NA	Intergenic	LTR22A|LTR|ERVK	21868	NM_006137	924	Hs.36972	NM_006137	ENSG00000173762	CD7	GP40|LEU-9|TP41|Tp40	CD7 molecule	protein-coding
chr11	44622979	44623254	651	NA	intron (NM_001024844, intron 4 of 8)	intron (NM_001024844, intron 4 of 8)	35975	NM_001024844	3732	Hs.527778	NM_001024844		CD82	4F9|C33|GR15|IA4|KAI1|R2|SAR2|ST6|TSPAN27	CD82 molecule	protein-coding
chr11	44606163	44606662	529	NA	intron (NM_001024844, intron 1 of 8)	intron (NM_001024844, intron 1 of 8)	19271	NM_001024844	3732	Hs.527778	NM_001024844		CD82	4F9|C33|GR15|IA4|KAI1|R2|SAR2|ST6|TSPAN27	CD82 molecule	protein-coding
chr12	6304844	6305603	126	NA	Intergenic	Intergenic	-4259	NM_001769	928	Hs.712104	XM_005253814	ENSG00000010278	CD9	BTCC-1|DRAP-27|MIC3|MRP-1|TSPAN-29|TSPAN29	CD9 molecule	protein-coding
chr12	6304844	6305603	126	NA	Intergenic	Intergenic	-4259	NM_001769	928	Hs.712104	XM_005253814	ENSG00000010278	CD9	BTCC-1|DRAP-27|MIC3|MRP-1|TSPAN-29|TSPAN29	CD9 molecule	protein-coding
chr13	49888100	49888511	268	NA	intron (NM_030925, intron 8 of 8)	intron (NM_030925, intron 8 of 8)	66258	NM_030911	81602	Hs.388220	NM_001193478	ENSG00000102543	CDADC1	NYD-SP15|bA103J18.1	cytidine and dCMP deaminase domain containing 1	protein-coding
chr1	100816983	100817581	60	NA	promoter-TSS (NM_033313)	promoter-TSS (NM_033313)	-741	NM_003672	8556	Hs.127411	XM_005271294	ENSG00000079335	CDC14A	cdc14|hCDC14	cell division cycle 14A	protein-coding
chr9	99328547	99329284	1021	NA	intron (NM_003671, intron 1 of 12)	CpG	288	NM_001077181	8555	Hs.40582	XM_005252286	ENSG00000081377	CDC14B	CDC14B3|Cdc14B1|Cdc14B2|hCDC14B	cell division cycle 14B	protein-coding
chr9	99374499	99374762	129	NA	intron (NM_003671, intron 1 of 12)	intron (NM_003671, intron 1 of 12)	7482	NM_003671	8555	Hs.40582	XM_005252286	ENSG00000081377	CDC14B	CDC14B3|Cdc14B1|Cdc14B2|hCDC14B	cell division cycle 14B	protein-coding
chr7	48988048	48988695	114	NA	Intergenic	MSTA-int|LTR|ERVL-MaLR	24214	NR_003595	168448	Hs.567757	NR_003595		CDC14C	CDC14B2|CDC14Bretro	cell division cycle 14C	pseudo
chr1	227583270	227583546	139	NA	Intergenic	Intergenic	-77582	NM_003607	8476	Hs.35433	XM_005273317	ENSG00000143776	CDC42BPA	MRCK|MRCKA|PK428	CDC42 binding protein kinase alpha (DMPK-like)	protein-coding
chr1	227589182	227589940	78	NA	Intergenic	L1PB1|LINE|L1	-83735	NM_003607	8476	Hs.35433	XM_005273317	ENSG00000143776	CDC42BPA	MRCK|MRCKA|PK428	CDC42 binding protein kinase alpha (DMPK-like)	protein-coding
chr1	227584191	227584819	76	NA	Intergenic	L2c|LINE|L2	-78679	NM_003607	8476	Hs.35433	XM_005273317	ENSG00000143776	CDC42BPA	MRCK|MRCKA|PK428	CDC42 binding protein kinase alpha (DMPK-like)	protein-coding
chr1	227545023	227545230	66	NA	Intergenic	LTR16A|LTR|ERVL	-39300	NM_003607	8476	Hs.35433	XM_005273317	ENSG00000143776	CDC42BPA	MRCK|MRCKA|PK428	CDC42 binding protein kinase alpha (DMPK-like)	protein-coding
chr1	227589182	227589940	41	NA	Intergenic	L1PB1|LINE|L1	-83735	NM_003607	8476	Hs.35433	XM_005273317	ENSG00000143776	CDC42BPA	MRCK|MRCKA|PK428	CDC42 binding protein kinase alpha (DMPK-like)	protein-coding
chr1	227584191	227584819	36	NA	Intergenic	L2c|LINE|L2	-78679	NM_003607	8476	Hs.35433	XM_005273317	ENSG00000143776	CDC42BPA	MRCK|MRCKA|PK428	CDC42 binding protein kinase alpha (DMPK-like)	protein-coding
chr1	227584191	227584819	31	NA	Intergenic	L2c|LINE|L2	-78679	NM_003607	8476	Hs.35433	XM_005273317	ENSG00000143776	CDC42BPA	MRCK|MRCKA|PK428	CDC42 binding protein kinase alpha (DMPK-like)	protein-coding
chr17	71305605	71306315	768	NA	intron (NM_012121, intron 1 of 1)	intron (NM_012121, intron 1 of 1)	2183	NM_012121	23580	Hs.3903	XM_005257182	ENSG00000179604	CDC42EP4	BORG4|CEP4|KAIA1777	CDC42 effector protein (Rho GTPase binding) 4	protein-coding
chr17	71284866	71285541	450	NA	intron (NM_012121, intron 1 of 1)	intron (NM_012121, intron 1 of 1)	22940	NM_012121	23580	Hs.3903	XM_005257182	ENSG00000179604	CDC42EP4	BORG4|CEP4|KAIA1777	CDC42 effector protein (Rho GTPase binding) 4	protein-coding
chr17	71304349	71305023	188	NA	intron (NM_012121, intron 1 of 1)	intron (NM_012121, intron 1 of 1)	3457	NM_012121	23580	Hs.3903	XM_005257182	ENSG00000179604	CDC42EP4	BORG4|CEP4|KAIA1777	CDC42 effector protein (Rho GTPase binding) 4	protein-coding
chr17	71336304	71336654	61	NA	intron (NM_001144952, intron 44 of 44)	L1MB5|LINE|L1	-28336	NM_012121	23580	Hs.3903	XM_005257182	ENSG00000179604	CDC42EP4	BORG4|CEP4|KAIA1777	CDC42 effector protein (Rho GTPase binding) 4	protein-coding
chr5	130617276	130617635	188	NA	intron (NM_001038702, intron 1 of 4)	MIRb|SINE|MIR	17753	NM_001038702	56990	Hs.713870	NM_001038702	ENSG00000158985	CDC42SE2	SPEC2	CDC42 small effector 2	protein-coding
chr5	130664426	130664672	86	NA	intron (NM_020240, intron 2 of 5)	intron (NM_020240, intron 2 of 5)	64847	NM_001038702	56990	Hs.713870	NM_001038702	ENSG00000158985	CDC42SE2	SPEC2	CDC42 small effector 2	protein-coding
chr17	38439986	38440597	167	NA	Intergenic	Intergenic	-3855	NM_001254	990	Hs.405958	NM_001254	ENSG00000094804	CDC6	CDC18L|HsCDC18|HsCDC6	cell division cycle 6	protein-coding
chr17	38439986	38440597	65	NA	Intergenic	Intergenic	-3855	NM_001254	990	Hs.405958	NM_001254	ENSG00000094804	CDC6	CDC18L|HsCDC18|HsCDC6	cell division cycle 6	protein-coding
chr1	38162840	38163104	183	NA	intron (NM_001256875, intron 3 of 9)	MER68|LTR|ERVL	4899	NM_001256875	55143	Hs.524571	NM_001256875	ENSG00000134690	CDCA8	BOR|BOREALIN|DasraB|MESRGP	cell division cycle associated 8	protein-coding
chr3	45161489	45162039	106	NA	intron (NM_178181, intron 1 of 3)	intron (NM_178181, intron 1 of 3)	26150	NM_022842	64866	Hs.476093	XM_005265404	ENSG00000163814	CDCP1	CD318|SIMA135|TRASK	CUB domain containing protein 1	protein-coding
chr3	45151730	45151961	106	NA	3' UTR (NM_178181, exon 4 of 4)	3' UTR (NM_178181, exon 4 of 4)	36069	NM_022842	64866	Hs.476093	XM_005265404	ENSG00000163814	CDCP1	CD318|SIMA135|TRASK	CUB domain containing protein 1	protein-coding
chr16	68786498	68786880	152	NA	intron (NM_004360, intron 2 of 15)	intron (NM_004360, intron 2 of 15)	15494	NM_004360	999	Hs.461086	XM_005256272	ENSG00000039068	CDH1	Arc-1|CD324|CDHE|ECAD|LCAM|UVO	cadherin 1, type 1, E-cadherin (epithelial)	protein-coding
chr16	68778751	68778976	67	NA	intron (NM_004360, intron 2 of 15)	intron (NM_004360, intron 2 of 15)	7668	NM_004360	999	Hs.461086	XM_005256272	ENSG00000039068	CDH1	Arc-1|CD324|CDHE|ECAD|LCAM|UVO	cadherin 1, type 1, E-cadherin (epithelial)	protein-coding
chr16	64512113	64512686	308	NA	Intergenic	Intergenic	643520	NM_001797	1009	Hs.116471	XM_005255761		CDH11	CAD11|CDHOB|OB|OSF-4	cadherin 11, type 2, OB-cadherin (osteoblast)	protein-coding
chr16	65159336	65159981	194	NA	Intergenic	Intergenic	-3739	NM_001797	1009	Hs.116471	XM_005255761		CDH11	CAD11|CDHOB|OB|OSF-4	cadherin 11, type 2, OB-cadherin (osteoblast)	protein-coding
chr16	65158274	65158576	97	NA	Intergenic	Intergenic	-2506	NM_001797	1009	Hs.116471	XM_005255761		CDH11	CAD11|CDHOB|OB|OSF-4	cadherin 11, type 2, OB-cadherin (osteoblast)	protein-coding
chr8	95210670	95211203	2794	NA	intron (NM_001144663, intron 1 of 17)	intron (NM_001144663, intron 1 of 17)	9879	NM_004063	1015	Hs.591853	NM_001144663	ENSG00000079112	CDH17	CDH16|HPT-1|HPT1	cadherin 17, LI cadherin (liver-intestine)	protein-coding
chr8	95204219	95204580	344	NA	intron (NM_004063, intron 2 of 17)	intron (NM_004063, intron 2 of 17)	16416	NM_004063	1015	Hs.591853	NM_001144663	ENSG00000079112	CDH17	CDH16|HPT-1|HPT1	cadherin 17, LI cadherin (liver-intestine)	protein-coding
chr8	95212044	95212515	285	NA	intron (NM_001144663, intron 1 of 17)	intron (NM_001144663, intron 1 of 17)	8536	NM_004063	1015	Hs.591853	NM_001144663	ENSG00000079112	CDH17	CDH16|HPT-1|HPT1	cadherin 17, LI cadherin (liver-intestine)	protein-coding
chr18	64391984	64392203	46	NA	Intergenic	Intergenic	-120718	NM_001271028	28513	Hs.42771	XM_005266688	ENSG00000071991	CDH19	CDH7|CDH7L2	cadherin 19, type 2	protein-coding
chr18	25671136	25671499	134	NA	intron (NM_001792, intron 2 of 15)	intron (NM_001792, intron 2 of 15)	86128	NM_001792	1000	Hs.606106	XM_005258181	ENSG00000170558	CDH2	CD325|CDHN|CDw325|NCAD	cadherin 2, type 1, N-cadherin (neuronal)	protein-coding
chr18	26315635	26315913	129	NA	Intergenic	MIRc|SINE|MIR	-558329	NM_001792	1000	Hs.606106	XM_005258181	ENSG00000170558	CDH2	CD325|CDHN|CDw325|NCAD	cadherin 2, type 1, N-cadherin (neuronal)	protein-coding
chr16	68674906	68675217	50	NA	Intergenic	L2a|LINE|L2	-3090	NM_001793	1001	Hs.191842	XM_005255756	ENSG00000062038	CDH3	CDHP|HJMD|PCAD	cadherin 3, type 1, P-cadherin (placental)	protein-coding
chr5	30605767	30606287	744	NA	Intergenic	L2|LINE|L2	-587735	NM_004932	1004	Hs.171054	NM_004932	ENSG00000113361	CDH6	CAD6|KCAD	cadherin 6, type 2, K-cadherin (fetal kidney)	protein-coding
chr5	31219090	31219460	115	NA	intron (NM_004932, intron 1 of 11)	MLT2D|LTR|ERVL	25513	NM_004932	1004	Hs.171054	NM_004932	ENSG00000113361	CDH6	CAD6|KCAD	cadherin 6, type 2, K-cadherin (fetal kidney)	protein-coding
chr5	175972643	175973318	660	NA	intron (NM_001171976, intron 1 of 31)	intron (NM_001171976, intron 1 of 31)	-3363	NM_017675	54825	Hs.4205	NM_001171976	ENSG00000074276	CDHR2	PCDH24|PCLKC	cadherin-related family member 2	protein-coding
chr5	175971594	175972075	630	NA	intron (NM_001171976, intron 1 of 31)	intron (NM_001171976, intron 1 of 31)	2322	NM_001171976	54825	Hs.4205	NM_001171976	ENSG00000074276	CDHR2	PCDH24|PCLKC	cadherin-related family member 2	protein-coding
chr5	175980281	175980586	160	NA	intron (NM_017675, intron 1 of 31)	intron (NM_017675, intron 1 of 31)	4090	NM_017675	54825	Hs.4205	NM_001171976	ENSG00000074276	CDHR2	PCDH24|PCLKC	cadherin-related family member 2	protein-coding
chr11	624588	625707	218	NA	promoter-TSS (NM_001171968)	promoter-TSS (NM_001171968)	-80	NM_031264	53841	Hs.165619	XM_005252987	ENSG00000099834	CDHR5	MU-PCDH|MUCDHL|MUPCDH	cadherin-related family member 5	protein-coding
chr16	4588561	4588953	397	NA	promoter-TSS (NM_013399)	promoter-TSS (NM_013399)	59	NM_001199055	29965	Hs.654653	XM_005255284	ENSG00000089486	CDIP1	C16orf5|CDIP|I1|LITAFL	cell death-inducing p53 target 1	protein-coding
chr16	89753555	89753969	372	NA	intron (NR_027702, intron 1 of 11)	intron (NR_027702, intron 1 of 11)	686	NR_027702	8558	Hs.699177	NM_001098533	ENSG00000185324	CDK10	PISSLRE	cyclin-dependent kinase 10	protein-coding
chr12	97029463	97029809	138	NA	Intergenic	MER21C|LTR|ERVL	-235270	NM_001170464	5128	Hs.506415	NM_001170464	ENSG00000059758	CDK17	PCTAIRE2|PCTK2	cyclin-dependent kinase 17	protein-coding
chr17	73992878	73993465	296	NA	intron (NR_037709, intron 3 of 9)	intron (NR_037709, intron 3 of 9)	-3816	NM_001258	1018	Hs.706766	XM_005256923	ENSG00000250506	CDK3	-	cyclin-dependent kinase 3	protein-coding
chr17	46043470	46043946	775	NA	Intergenic	Intergenic	-4186	NM_001278197	80279	Hs.20157	NM_001278197	ENSG00000108465	CDK5RAP3	C53|HSF-27|IC53|LZAP|MST016|OK/SW-cl.114|PP1553	CDK5 regulatory subunit associated protein 3	protein-coding
chr5	133635360	133635814	530	NA	intron (NM_001113575, intron 12 of 12)	intron (NM_001113575, intron 12 of 12)	67178	NM_016508	51265	Hs.719926	XM_005272000	ENSG00000006837	CDKL3	NKIAMRE	cyclin-dependent kinase-like 3	protein-coding
chr4	184365266	184365584	255	NA	promoter-TSS (NM_017632)	promoter-TSS (NM_017632)	-364	NM_017632	55602	Hs.644077	XM_005263118	ENSG00000168564	CDKN2AIP	CARF	CDKN2A interacting protein	protein-coding
chr9	22098716	22098994	128	NA	intron (NR_003529, intron 14 of 18)	intron (NR_003529, intron 14 of 18)	-89543	NM_078487	1030	Hs.72901	NM_004936	ENSG00000147883	CDKN2B	CDK4I|INK4B|MTS2|P15|TP15|p15INK4b	cyclin-dependent kinase inhibitor 2B (p15, inhibits CDK4)	protein-coding
chr9	22088724	22089003	60	NA	intron (NR_003529, intron 12 of 18)	intron (NR_003529, intron 12 of 18)	-79551	NM_078487	1030	Hs.72901	NM_004936	ENSG00000147883	CDKN2B	CDK4I|INK4B|MTS2|P15|TP15|p15INK4b	cyclin-dependent kinase inhibitor 2B (p15, inhibits CDK4)	protein-coding
chr14	54854099	54854492	214	NA	Intergenic	MER68|LTR|ERVL	-9378	NM_001130851	1033	Hs.84113	XM_005267257	ENSG00000100526	CDKN3	CDI1|CIP2|KAP|KAP1	cyclin-dependent kinase inhibitor 3	protein-coding
chr14	54820734	54821178	197	NA	Intergenic	MER61F|LTR|ERV1	-42717	NM_001130851	1033	Hs.84113	XM_005267257	ENSG00000100526	CDKN3	CDI1|CIP2|KAP|KAP1	cyclin-dependent kinase inhibitor 3	protein-coding
chr16	22382824	22383438	1065	NA	intron (NM_001802, intron 1 of 4)	intron (NM_001802, intron 1 of 4)	2807	NM_001802	1039	Hs.513430	NM_001802	ENSG00000140743	CDR2	CDR62|Yo	cerebellar degeneration-related protein 2, 62kDa	protein-coding
chr17	15336458	15336798	177	NA	Intergenic	Intergenic	34297	NM_001204477	284040	Hs.731765	NM_173622	ENSG00000239704	CDRT4	-	CMT1A duplicated region transcript 4	protein-coding
chr17	15394048	15394392	115	NA	intron (NM_001204478, intron 5 of 6)	intron (NM_001204478, intron 5 of 6)	-23295	NM_001204477	284040	Hs.731765	NM_173622	ENSG00000239704	CDRT4	-	CMT1A duplicated region transcript 4	protein-coding
chr17	14659851	14660184	158	NA	Intergenic	Intergenic	-274275	NR_033371	94150	Hs.147654	NR_033371	ENSG00000259944	CDRT7	LINC00025|NCRNA00025	CMT1A duplicated region transcript 7 (non-protein coding)	ncRNA
chr17	14641582	14641855	117	NA	Intergenic	Intergenic	-292574	NR_033371	94150	Hs.147654	NR_033371	ENSG00000259944	CDRT7	LINC00025|NCRNA00025	CMT1A duplicated region transcript 7 (non-protein coding)	ncRNA
chr3	133259732	133260297	484	NA	Intergenic	MLT1F|LTR|ERVL-MaLR	-32420	NM_001134422	55573	Hs.518265	XM_005247588	ENSG00000091527	CDV3	H41	CDV3 homolog (mouse)	protein-coding
chr13	28534779	28535174	190	NA	Intergenic	CpG	8529	NM_001265	1045	Hs.740844	NM_001265		CDX2	CDX-3|CDX3	caudal type homeobox 2	protein-coding
chr6	4931802	4932221	111	NA	intron (NM_001143970, intron 2 of 6)	intron (NM_001143970, intron 2 of 6)	41785	NM_001143971	9425	Hs.269092	NM_001143970	ENSG00000153046	CDYL	CDYL1	chromodomain protein, Y-like	protein-coding
chr6	4518853	4519097	32	NA	Intergenic	Intergenic	-187418	NR_026590	9425	Hs.269092	NM_001143970	ENSG00000153046	CDYL	CDYL1	chromodomain protein, Y-like	protein-coding
chr16	80917090	80917478	75	NA	Intergenic	Intergenic	-79109	NM_152342	124359	Hs.373908	NM_152342	ENSG00000166446	CDYL2	PCCP1	chromodomain protein, Y-like 2	protein-coding
chr19	45197870	45198449	1088	NA	Intergenic	L2a|LINE|L2	-4262	NM_001039213	388551	Hs.456381	NM_001039213	ENSG00000213892	CEACAM16	CEAL2|DFNA4B	carcinoembryonic antigen-related cell adhesion molecule 16	protein-coding
chr19	45198743	45199083	55	NA	Intergenic	Intergenic	-3508	NM_001039213	388551	Hs.456381	NM_001039213	ENSG00000213892	CEACAM16	CEAL2|DFNA4B	carcinoembryonic antigen-related cell adhesion molecule 16	protein-coding
chr19	51978190	51978898	1803	NA	Intergenic	MER77B|LTR|ERVL	-3353	NM_001278392	729767	Hs.653111	NM_001278392		CEACAM18	-	carcinoembryonic antigen-related cell adhesion molecule 18	protein-coding
chr19	51981278	51981980	365	NA	promoter-TSS (NM_001278392)	promoter-TSS (NM_001278392)	-268	NM_001278392	729767	Hs.653111	NM_001278392		CEACAM18	-	carcinoembryonic antigen-related cell adhesion molecule 18	protein-coding
chr19	51976327	51976943	163	NA	Intergenic	Intergenic	-5262	NM_001278392	729767	Hs.653111	NM_001278392		CEACAM18	-	carcinoembryonic antigen-related cell adhesion molecule 18	protein-coding
chr19	42069700	42070502	437	NA	intron (NM_001288773, intron 1 of 7)	LSU-rRNA_Hsa|rRNA|rRNA	-12430	NR_110107	90273	Hs.655885	XM_005259372	ENSG00000007129	CEACAM21	CEACAM3|R29124_1	carcinoembryonic antigen-related cell adhesion molecule 21	protein-coding
chr19	42153891	42154101	47	NA	Intergenic	LTR8A|LTR|ERV1	-20554	NM_001817	1089	Hs.12	XM_005258434	ENSG00000105352	CEACAM4	CGM7|CGM7_HUMAN|NCA	carcinoembryonic antigen-related cell adhesion molecule 4	protein-coding
chr19	42278364	42278785	98	NA	Intergenic	Intergenic	19176	NM_002483	4680	Hs.466814	NM_002483	ENSG00000086548	CEACAM6	CD66c|CEAL|NCA	carcinoembryonic antigen-related cell adhesion molecule 6 (non-specific cross reacting antigen)	protein-coding
chr19	42271052	42271321	82	NA	intron (NM_002483, intron 5 of 5)	intron (NM_002483, intron 5 of 5)	11788	NM_002483	4680	Hs.466814	NM_002483	ENSG00000086548	CEACAM6	CD66c|CEAL|NCA	carcinoembryonic antigen-related cell adhesion molecule 6 (non-specific cross reacting antigen)	protein-coding
chr19	33784390	33784666	128	NA	Intergenic	Intergenic	8942	NM_001287424	1050	Hs.76171	NM_001285829	ENSG00000245848	CEBPA	C/EBP-alpha|CEBP	CCAAT/enhancer binding protein (C/EBP), alpha	protein-coding
chr19	33807343	33807817	298	NA	Intergenic	Intergenic	13817	NR_026887	80054	Hs.287521	NM_024988	ENSG00000267296	CEBPA-AS1	-	CEBPA antisense RNA 1 (head to head)	ncRNA
chr19	33801855	33802197	34	NA	Intergenic	Intergenic	8263	NR_026887	80054	Hs.287521	NM_024988	ENSG00000267296	CEBPA-AS1	-	CEBPA antisense RNA 1 (head to head)	ncRNA
chr19	33795830	33796373	32	NA	TTS (NR_026887)	TTS (NR_026887)	2338	NR_026887	80054	Hs.287521	NM_024988	ENSG00000267296	CEBPA-AS1	-	CEBPA antisense RNA 1 (head to head)	ncRNA
chr8	48437522	48437933	55	NA	intron (NR_104581, intron 6 of 16)	intron (NR_104581, intron 6 of 16)	212999	NM_005195	1052	Hs.440829	NM_005195		CEBPD	C/EBP-delta|CELF|CRP3|NF-IL6-beta	CCAAT/enhancer binding protein (C/EBP), delta	protein-coding
chr8	48437522	48437933	26	NA	intron (NR_104581, intron 6 of 16)	intron (NR_104581, intron 6 of 16)	212999	NM_005195	1052	Hs.440829	NM_005195		CEBPD	C/EBP-delta|CELF|CRP3|NF-IL6-beta	CCAAT/enhancer binding protein (C/EBP), delta	protein-coding
chr8	48426413	48426703	23	NA	intron (NR_104581, intron 6 of 16)	intron (NR_104581, intron 6 of 16)	224168	NM_005195	1052	Hs.440829	NM_005195		CEBPD	C/EBP-delta|CELF|CRP3|NF-IL6-beta	CCAAT/enhancer binding protein (C/EBP), delta	protein-coding
chr19	33856776	33857519	287	NA	Intergenic	L1MC3|LINE|L1	-7428	NM_001806	1054	Hs.429666	NM_001252296	ENSG00000153879	CEBPG	GPE1BP|IG/EBP-1	CCAAT/enhancer binding protein (C/EBP), gamma	protein-coding
chr19	33867453	33867821	155	NA	intron (NM_001252296, intron 1 of 1)	intron (NM_001252296, intron 1 of 1)	2207	NM_001252296	1054	Hs.429666	NM_001252296	ENSG00000153879	CEBPG	GPE1BP|IG/EBP-1	CCAAT/enhancer binding protein (C/EBP), gamma	protein-coding
chr19	33894464	33894877	131	NA	intron (NM_001166056, intron 9 of 12)	intron (NM_001166056, intron 9 of 12)	29240	NM_001252296	1054	Hs.429666	NM_001252296	ENSG00000153879	CEBPG	GPE1BP|IG/EBP-1	CCAAT/enhancer binding protein (C/EBP), gamma	protein-coding
chr19	33856776	33857519	73	NA	Intergenic	L1MC3|LINE|L1	-7428	NM_001806	1054	Hs.429666	NM_001252296	ENSG00000153879	CEBPG	GPE1BP|IG/EBP-1	CCAAT/enhancer binding protein (C/EBP), gamma	protein-coding
chr19	33883443	33883642	66	NA	intron (NM_001166056, intron 10 of 12)	intron (NM_001166056, intron 10 of 12)	18112	NM_001252296	1054	Hs.429666	NM_001252296	ENSG00000153879	CEBPG	GPE1BP|IG/EBP-1	CCAAT/enhancer binding protein (C/EBP), gamma	protein-coding
chr22	17640629	17640867	70	NA	promoter-TSS (NM_033070)	promoter-TSS (NM_033070)	469	NR_024482	100130717	Hs.660066	NR_024482	ENSG00000185837	CECR5-AS1	CECR4|NCRNA00017	CECR5 antisense RNA 1	ncRNA
chr1	22335330	22335672	163	NA	intron (NM_005747, intron 6 of 7)	AluSx|SINE|Alu	7352	NM_005747	10136	Hs.181289	NM_005747	ENSG00000142789	CELA3A	ELA3|ELA3A	chymotrypsin-like elastase family, member 3A	protein-coding
chr22	46959159	46959557	201	NA	Intergenic	Intergenic	-26291	NM_014246	9620	Hs.252387	NM_014246	ENSG00000075275	CELSR1	CDHF9|FMI2|HFMI2|ME2	cadherin, EGF LAG seven-pass G-type receptor 1	protein-coding
chr1	214851533	214852130	308	NA	Intergenic	Intergenic	75299	NM_016343	1063	Hs.497741	XM_005273008	ENSG00000117724	CENPF	CENF|PRO1779|hcp-1	centromere protein F, 350/400kDa	protein-coding
chr16	80944177	80944682	149	NA	Intergenic	L1MA9|LINE|L1	-95674	NM_001270474	55839	Hs.726537	XM_005256055	ENSG00000166451	CENPN	BM039|C16orf60|CENP-N|ICEN32	centromere protein N	protein-coding
chr16	80948359	80948560	66	NA	Intergenic	Intergenic	-91644	NM_001270474	55839	Hs.726537	XM_005256055	ENSG00000166451	CENPN	BM039|C16orf60|CENP-N|ICEN32	centromere protein N	protein-coding
chr16	67891432	67891908	116	NA	intron (NM_005796, intron 1 of 4)	intron (NM_005796, intron 1 of 4)	-10309	NM_025082	80152	Hs.288382	XM_005256167	ENSG00000102901	CENPT	C16orf56|CENP-T	centromere protein T	protein-coding
chr17	16232844	16233220	174	NA	Intergenic	Intergenic	23780	NM_181716	201161	Hs.433422	XM_005256512	ENSG00000166582	CENPV	3110013H01Rik|CENP-V|PRR6|p30	centromere protein V	protein-coding
chr17	16243177	16243462	28	NA	Intergenic	AT_rich|Low_complexity|Low_complexity	13493	NM_181716	201161	Hs.433422	XM_005256512	ENSG00000166582	CENPV	3110013H01Rik|CENP-V|PRR6|p30	centromere protein V	protein-coding
chr14	105331001	105331324	141	NA	promoter-TSS (NM_001112726)	promoter-TSS (NM_001112726)	-488	NM_001112726	283638	Hs.533721	XM_005267550	ENSG00000099814	CEP170B	CEP170R|FAM68C|KIAA0284	centrosomal protein 170B	protein-coding
chr18	13017211	13017690	505	NA	intron (NM_032142, intron 7 of 44)	intron (NM_032142, intron 7 of 44)	26089	NM_032142	55125	Hs.100914	XM_005258107	ENSG00000101639	CEP192	PPP1R62	centrosomal protein 192kDa	protein-coding
chr1	179900085	179900401	48	NA	Intergenic	Intergenic	-23665	NM_014810	9857	Hs.413045	XM_005245635	ENSG00000135837	CEP350	CAP350|GM133	centrosomal protein 350kDa	protein-coding
chr18	12701199	12701455	31	NA	intron (NM_001271989, intron 1 of 10)	intron (NM_001271989, intron 1 of 10)	1449	NR_073537	79959	Hs.236940	XM_005258149	ENSG00000101624	CEP76	C18orf9|HsT1705	centrosomal protein 76kDa	protein-coding
chr9	80757090	80757522	207	NA	Intergenic	MER11A|LTR|ERVK	-93685	NM_001098802	84131	Hs.374421	XM_005252263	ENSG00000148019	CEP78	C9orf81|IP63	centrosomal protein 78kDa	protein-coding
chr1	111644489	111645422	320	NA	Intergenic	L1PBa1|LINE|L1	-37294	NM_001007794	10390	Hs.636850	XM_005270353	ENSG00000134255	CEPT1	-	choline/ethanolamine phosphotransferase 1	protein-coding
chr1	111639108	111639689	106	NA	Intergenic	MSTB-int|LTR|ERVL-MaLR	-42851	NM_001007794	10390	Hs.636850	XM_005270353	ENSG00000134255	CEPT1	-	choline/ethanolamine phosphotransferase 1	protein-coding
chr1	111644489	111645422	59	NA	Intergenic	L1PBa1|LINE|L1	-37294	NM_001007794	10390	Hs.636850	XM_005270353	ENSG00000134255	CEPT1	-	choline/ethanolamine phosphotransferase 1	protein-coding
chr22	47140337	47140821	384	NA	Intergenic	Intergenic	-6427	NM_022766	64781	Hs.200668	NM_182661	ENSG00000100422	CERK	LK4|dA59H18.2|dA59H18.3|hCERK	ceramide kinase	protein-coding
chr2	182525019	182525301	126	NA	Intergenic	MLT1D|LTR|ERVL-MaLR	-3326	NR_027689	375298	Hs.732358	NM_001030311	ENSG00000188452	CERKL	RP26	ceramide kinase-like	protein-coding
chr1	150943614	150944222	817	NA	intron (NM_181746, intron 1 of 10)	intron (NM_181746, intron 1 of 10)	3561	NM_022075	29956	Hs.744017	XM_005245107	ENSG00000143418	CERS2	L3|LASS2|SP260|TMSG1	ceramide synthase 2	protein-coding
chr2	169349786	169350138	278	NA	intron (NM_001256126, intron 1 of 10)	MIR|SINE|MIR	37203	NM_001256126	253782	Hs.743222	XM_005246440	ENSG00000172292	CERS6	CERS5|LASS6	ceramide synthase 6	protein-coding
chr16	66987481	66987703	71	NA	Intergenic	Intergenic	-7540	NM_001185177	23491	Hs.268700	NM_001185176	ENSG00000172828	CES3	ES31	carboxylesterase 3	protein-coding
chr16	57017254	57017757	154	NA	exon (NM_000078, exon 16 of 16)	exon (NM_000078, exon 16 of 16)	21670	NM_001286085	1071	Hs.89538	XM_005255776	ENSG00000087237	CETP	BPIFF|HDLCQ10	cholesteryl ester transfer protein, plasma	protein-coding
chr11	65621399	65622036	572	NA	TTS (NM_005507)	TTS (NM_005507)	4087	NM_005507	1072	Hs.170622	NM_005507	ENSG00000172757	CFL1	CFL|HEL-S-15	cofilin 1 (non-muscle)	protein-coding
chr2	202013549	202014305	214	NA	intron (NR_040030, intron 4 of 6)	intron (NR_040030, intron 4 of 6)	8588	NR_040030	65072	Hs.664613	XR_241318	ENSG00000226312	CFLAR-AS1	ALS2CR10	CFLAR antisense RNA 1	ncRNA
chr7	117212989	117213299	177	NA	intron (NM_000492, intron 11 of 26)	intron (NM_000492, intron 11 of 26)	93127	NM_000492	1080	Hs.661104	NM_000492	ENSG00000001626	CFTR	ABC35|ABCC7|CF|CFTR/MRP|MRP7|TNR-CFTR|dJ760C5.1	cystic fibrosis transmembrane conductance regulator (ATP-binding cassette sub-family C, member 7)	protein-coding
chr7	117129959	117130411	83	NA	intron (NM_000492, intron 1 of 26)	MIRb|SINE|MIR	10168	NM_000492	1080	Hs.661104	NM_000492	ENSG00000001626	CFTR	ABC35|ABCC7|CF|CFTR/MRP|MRP7|TNR-CFTR|dJ760C5.1	cystic fibrosis transmembrane conductance regulator (ATP-binding cassette sub-family C, member 7)	protein-coding
chr3	88557898	88558251	201	NA	Intergenic	L1PA2|LINE|L1	-359058	NM_001195308	8545	Hs.444818	XM_005264772	ENSG00000163320	CGGBP1	CGGBP|p20-CGGBP	CGG triplet repeat binding protein 1	protein-coding
chr1	151482090	151482931	1375	NA	Intergenic	Intergenic	-1352	NM_020770	57530	Hs.591464	XM_005245365	ENSG00000143375	CGN	-	cingulin	protein-coding
chr1	151482090	151482931	645	NA	Intergenic	Intergenic	-1352	NM_020770	57530	Hs.591464	XM_005245365	ENSG00000143375	CGN	-	cingulin	protein-coding
chr1	151485298	151485865	53	NA	intron (NM_020770, intron 1 of 20)	intron (NM_020770, intron 1 of 20)	1719	NM_020770	57530	Hs.591464	XM_005245365	ENSG00000143375	CGN	-	cingulin	protein-coding
chr1	151485298	151485865	45	NA	intron (NM_020770, intron 1 of 20)	intron (NM_020770, intron 1 of 20)	1719	NM_020770	57530	Hs.591464	XM_005245365	ENSG00000143375	CGN	-	cingulin	protein-coding
chr1	146709318	146710124	598	NA	Intergenic	Intergenic	-4570	NM_001256338	9557	Hs.191164	NM_001256336	ENSG00000131778	CHD1L	ALC1|CHDL	chromodomain helicase DNA binding protein 1-like	protein-coding
chr1	146709318	146710124	26	NA	Intergenic	Intergenic	-4570	NM_001256338	9557	Hs.191164	NM_001256336	ENSG00000131778	CHD1L	ALC1|CHDL	chromodomain helicase DNA binding protein 1-like	protein-coding
chr20	40279253	40279466	63	NA	Intergenic	Intergenic	-32226	NM_032221	84181	Hs.740645	XM_005260573	ENSG00000124177	CHD6	CHD-6|CHD5|RIGB	chromodomain helicase DNA binding protein 6	protein-coding
chr16	53086428	53086753	125	NA	Intergenic	Intergenic	-2355	NM_025134	80205	Hs.622347	XM_005256168	ENSG00000177200	CHD9	AD013|CReMM|KISH2|PRIC320	chromodomain helicase DNA binding protein 9	protein-coding
chr3	53876864	53877998	291	NA	intron (NM_018397, intron 1 of 8)	MIRc|SINE|MIR	2989	NM_018397	55349	Hs.729536	NM_018397		CHDH	-	choline dehydrogenase	protein-coding
chr3	53876864	53877998	94	NA	intron (NM_018397, intron 1 of 8)	MIRc|SINE|MIR	2989	NM_018397	55349	Hs.729536	NM_018397		CHDH	-	choline dehydrogenase	protein-coding
chr3	53878809	53879448	93	NA	intron (NM_018397, intron 1 of 8)	intron (NM_018397, intron 1 of 8)	1292	NM_018397	55349	Hs.729536	NM_018397		CHDH	-	choline dehydrogenase	protein-coding
chr14	93451116	93451650	114	NA	intron (NM_001142593, intron 5 of 10)	L1MC4a|LINE|L1	61938	NM_001275	1113	Hs.150793	XM_005267292	ENSG00000100604	CHGA	CGA	chromogranin A (parathyroid secretory protein 1)	protein-coding
chr11	67914555	67914816	95	NA	Intergenic	Intergenic	-25827	NM_001277	1119	Hs.77221	NM_001277	ENSG00000110721	CHKA	CHK|CK|CKI|EK	choline kinase alpha	protein-coding
chr11	67913456	67913742	81	NA	Intergenic	AluSx1|SINE|Alu	-24741	NM_001277	1119	Hs.77221	NM_001277	ENSG00000110721	CHKA	CHK|CK|CKI|EK	choline kinase alpha	protein-coding
chr11	67867007	67867340	34	NA	intron (NM_212469, intron 1 of 10)	intron (NM_212469, intron 1 of 10)	21685	NM_212469	1119	Hs.77221	NM_001277	ENSG00000110721	CHKA	CHK|CK|CKI|EK	choline kinase alpha	protein-coding
chr1	241794103	241794755	310	NA	3' UTR (NM_001821, exon 1 of 1)	3' UTR (NM_001821, exon 1 of 1)	4803	NM_001821	1122	Hs.654545	NM_001821	ENSG00000203668	CHML	REP2	choroideremia-like (Rab escort protein 2)	protein-coding
chr20	32402196	32402623	184	NA	intron (NM_176812, intron 1 of 4)	intron (NM_176812, intron 1 of 4)	3299	NM_176812	128866	Hs.472471	NM_176812	ENSG00000101421	CHMP4B	C20orf178|CHMP4A|CTPP3|CTRCT31|SNF7|SNF7-2|Shax1|VPS32B|Vps32-2|dJ553F4.4	charged multivesicular body protein 4B	protein-coding
chr20	32384327	32384888	128	NA	Intergenic	Intergenic	-14503	NM_176812	128866	Hs.472471	NM_176812	ENSG00000101421	CHMP4B	C20orf178|CHMP4A|CTPP3|CTRCT31|SNF7|SNF7-2|Shax1|VPS32B|Vps32-2|dJ553F4.4	charged multivesicular body protein 4B	protein-coding
chr20	32400969	32401201	114	NA	intron (NM_176812, intron 1 of 4)	L2a|LINE|L2	1975	NM_176812	128866	Hs.472471	NM_176812	ENSG00000101421	CHMP4B	C20orf178|CHMP4A|CTPP3|CTRCT31|SNF7|SNF7-2|Shax1|VPS32B|Vps32-2|dJ553F4.4	charged multivesicular body protein 4B	protein-coding
chr20	32377417	32377673	42	NA	intron (NR_104259, intron 13 of 13)	intron (NR_104259, intron 13 of 13)	-21565	NM_176812	128866	Hs.472471	NM_176812	ENSG00000101421	CHMP4B	C20orf178|CHMP4A|CTPP3|CTRCT31|SNF7|SNF7-2|Shax1|VPS32B|Vps32-2|dJ553F4.4	charged multivesicular body protein 4B	protein-coding
chr20	32377417	32377673	21	NA	intron (NR_104259, intron 13 of 13)	intron (NR_104259, intron 13 of 13)	-21565	NM_176812	128866	Hs.472471	NM_176812	ENSG00000101421	CHMP4B	C20orf178|CHMP4A|CTPP3|CTRCT31|SNF7|SNF7-2|Shax1|VPS32B|Vps32-2|dJ553F4.4	charged multivesicular body protein 4B	protein-coding
chr7	29511280	29511932	757	NA	intron (NM_004067, intron 6 of 12)	intron (NM_004067, intron 6 of 12)	-7880	NM_001039936	1124	Hs.710429	XM_005249597	ENSG00000106069	CHN2	ARHGAP3|BCH|CHN2-3|RHOGAP3	chimerin 2	protein-coding
chr7	29415412	29416131	262	NA	intron (NM_004067, intron 3 of 12)	intron (NM_004067, intron 3 of 12)	-103715	NM_001039936	1124	Hs.710429	XM_005249597	ENSG00000106069	CHN2	ARHGAP3|BCH|CHN2-3|RHOGAP3	chimerin 2	protein-coding
chr7	29452614	29452835	93	NA	intron (NM_004067, intron 6 of 12)	intron (NM_004067, intron 6 of 12)	-66762	NM_001039936	1124	Hs.710429	XM_005249597	ENSG00000106069	CHN2	ARHGAP3|BCH|CHN2-3|RHOGAP3	chimerin 2	protein-coding
chr7	29268289	29268790	72	NA	intron (NM_004067, intron 1 of 12)	intron (NM_004067, intron 1 of 12)	34418	NM_004067	1124	Hs.710429	XM_005249597	ENSG00000106069	CHN2	ARHGAP3|BCH|CHN2-3|RHOGAP3	chimerin 2	protein-coding
chr7	29489372	29489805	33	NA	intron (NM_004067, intron 6 of 12)	intron (NM_004067, intron 6 of 12)	-29898	NM_001039936	1124	Hs.710429	XM_005249597	ENSG00000106069	CHN2	ARHGAP3|BCH|CHN2-3|RHOGAP3	chimerin 2	protein-coding
chr15	41533744	41534365	879	NA	intron (NM_007236, intron 1 of 6)	intron (NM_007236, intron 1 of 6)	10617	NM_007236	11261	Hs.745372	XM_005254140	ENSG00000187446	CHP1	CHP|SLC9A1BP|Sid470p|p22|p24	calcineurin-like EF-hand protein 1	protein-coding
chr8	141520822	141521354	259	NA	promoter-TSS (NR_023360)	promoter-TSS (NR_023360)	-309	NM_017444	54108	Hs.279704	NM_017444	ENSG00000104472	CHRAC1	CHARC1|CHARC15|CHRAC-1|CHRAC-15|CHRAC15|YCL1	chromatin accessibility complex 1	protein-coding
chr11	46405488	46405950	295	NA	TTS (NR_073039)	TTS (NR_073039)	2388	NM_000741	1132	Hs.248100	XM_005252770	ENSG00000180720	CHRM4	HM4|M4R	cholinergic receptor, muscarinic 4	protein-coding
chr8	27323271	27323548	28	NA	intron (NM_000742, intron 5 of 6)	intron (NM_000742, intron 5 of 6)	13404	NM_000742	1135	Hs.57718	XM_005273396	ENSG00000120903	CHRNA2	-	cholinergic receptor, nicotinic, alpha 2 (neuronal)	protein-coding
chr15	32334862	32335155	65	NA	intron (NM_000746, intron 2 of 9)	L1MC1|LINE|L1	12322	NR_046324	1139	Hs.713151	NM_000746		CHRNA7	CHRNA7-2|NACHRA7	cholinergic receptor, nicotinic, alpha 7 (neuronal)	protein-coding
chr4	40371806	40372395	440	NA	Intergenic	Intergenic	34754	NM_017581	55584	Hs.272278	NM_017581	ENSG00000174343	CHRNA9	HSA243342|NACHRA9	cholinergic receptor, nicotinic, alpha 9 (neuronal)	protein-coding
chr4	40290844	40291165	71	NA	Intergenic	AluSq|SINE|Alu	-46342	NM_017581	55584	Hs.272278	NM_017581	ENSG00000174343	CHRNA9	HSA243342|NACHRA9	cholinergic receptor, nicotinic, alpha 9 (neuronal)	protein-coding
chr5	129812050	129812386	173	NA	Intergenic	LTR22C|LTR|ERVK	571695	NM_175856	337876	Hs.213137	XM_005271982	ENSG00000198108	CHSY3	CHSY2|CSS3	chondroitin sulfate synthase 3	protein-coding
chr15	90776633	90776849	55	NA	promoter-TSS (NM_001013657)	promoter-TSS (NM_001013657)	538	NM_006384	10519	Hs.715556	NM_001277764		CIB1	CIB|CIBP|KIP1|PRKDCIP|SIP2-28	calcium and integrin binding 1 (calmyrin)	protein-coding
chr19	16272000	16272368	183	NA	TTS (NM_054113)	TTS (NM_054113)	12102	NM_054113	117286	Hs.255432	XM_005259728	ENSG00000141977	CIB3	KIP3	calcium and integrin binding family member 3	protein-coding
chr3	9920452	9920698	126	NA	promoter-TSS (NM_001199623)	promoter-TSS (NM_001199623)	-79	NM_001199623	63924	Hs.567562	XM_005265373	ENSG00000187288	CIDEC	CIDE-3|CIDE3|FPLD5|FSP27	cell death-inducing DFFA-like effector c	protein-coding
chr6	139699912	139700392	282	NA	Intergenic	Intergenic	-4365	NM_006079	10370	Hs.82071	NM_001168388	ENSG00000164442	CITED2	ASD8|MRG-1|MRG1|P35SRJ|VSD2	Cbp/p300-interacting transactivator, with Glu/Asp-rich carboxy-terminal domain, 2	protein-coding
chr2	113495139	113495541	84	NA	TTS (NM_152515)	TTS (NM_152515)	26914	NM_152515	150468	Hs.434250	NM_152515		CKAP2L	-	cytoskeleton associated protein 2-like	protein-coding
chr9	91893910	91894224	267	NA	Intergenic	Intergenic	-32046	NM_001827	1164	Hs.83758	NM_001827	ENSG00000123975	CKS2	CKSHS2	CDC28 protein kinase regulatory subunit 2	protein-coding
chr1	86887694	86888120	192	NA	Intergenic	Intergenic	-1862	NM_006536	9635	Hs.241551	NM_006536	ENSG00000137975	CLCA2	CACC|CACC3|CLCRG2|CaCC-3	chloride channel accessory 2	protein-coding
chr11	67141561	67141927	98	NA	promoter-TSS (NM_001166212)	promoter-TSS (NM_001166212)	-96	NM_001166212	23529	Hs.502977	XM_005273857	ENSG00000175505	CLCF1	BSF-3|BSF3|CISS2|CLC|NNT-1|NNT1|NR6	cardiotrophin-like cytokine factor 1	protein-coding
chr3	184069975	184070361	106	NA	intron (NM_004366, intron 20 of 23)	intron (NM_004366, intron 20 of 23)	9271	NM_001171089	1181	Hs.436847	NM_001171087	ENSG00000114859	CLCN2	CIC-2|CLC2|ECA2|ECA3|EGI11|EGI3|EGMA|EJM6|EJM8|clC-2	chloride channel, voltage-sensitive 2	protein-coding
chr4	170578990	170579207	58	NA	intron (NM_001243372, intron 2 of 11)	intron (NM_001243372, intron 2 of 11)	-2115	NM_001243374	1182	Hs.736017	XM_005262726	ENSG00000109572	CLCN3	CLC3|ClC-3	chloride channel, voltage-sensitive 3	protein-coding
chrX	10137282	10137624	126	NA	intron (NM_001256944, intron 2 of 10)	intron (NM_001256944, intron 2 of 10)	12468	NM_001830	1183	Hs.495674	XM_005274443	ENSG00000073464	CLCN4	CLC4|ClC-4|ClC-4A	chloride channel, voltage-sensitive 4	protein-coding
chrX	49878732	49879208	71	NA	Intergenic	MER4B|LTR|ERV1	44814	NM_001282163	1184	Hs.745501	NM_000084	ENSG00000171365	CLCN5	CLC5|CLCK2|ClC-5|DENTS|NPHL1|NPHL2|XLRH|XRN|hCIC-K2	chloride channel, voltage-sensitive 5	protein-coding
chr1	16365078	16365410	131	NA	Intergenic	LTR16A1|LTR|ERVL	-4987	NM_000085	1188	Hs.352243	XM_005245733	ENSG00000184908	CLCNKB	CLCKB|ClC-K2|ClC-Kb	chloride channel, voltage-sensitive Kb	protein-coding
chr3	190024960	190025399	201	NA	3' UTR (NM_021101, exon 4 of 4)	3' UTR (NM_021101, exon 4 of 4)	15056	NM_021101	9076	Hs.439060	NM_021101	ENSG00000163347	CLDN1	CLD1|ILVASC|SEMP1	claudin 1	protein-coding
chr13	96187508	96188088	265	NA	intron (NM_182848, intron 1 of 4)	L2c|LINE|L2	-1634	NR_046533	100874194	Hs.569229	NR_046533	ENSG00000223392	CLDN10-AS1	RP11-694F24.2	CLDN10 antisense RNA 1	ncRNA
chrX	106175885	106176282	108	NA	Intergenic	L2b|LINE|L2	12477	NM_020384	9075	Hs.522746	NM_001171092	ENSG00000165376	CLDN2	-	claudin 2	protein-coding
chr8	8559224	8559567	112	NA	promoter-TSS (NM_194284)	promoter-TSS (NM_194284)	-271	NM_194284	137075	Hs.183617	NM_194284	ENSG00000253958	CLDN23	CLDNL|hCG1646163	claudin 23	protein-coding
chr8	8630129	8630357	93	NA	Intergenic	LTR36|LTR|ERV1	70577	NM_194284	137075	Hs.183617	NM_194284	ENSG00000253958	CLDN23	CLDNL|hCG1646163	claudin 23	protein-coding
chr4	184255108	184255641	286	NA	Intergenic	L2b|LINE|L2	-11795	NM_001185149	100132463	Hs.727475	NM_001185149	ENSG00000185758	CLDN24	CLDN21	claudin 24	protein-coding
chr7	73187629	73187885	23	NA	Intergenic	AluSx|SINE|Alu	-3157	NM_001306	1365	Hs.647023	NM_001306	ENSG00000165215	CLDN3	C7orf1|CPE-R2|CPETR2|HRVP1|RVP1	claudin 3	protein-coding
chr7	73244107	73244671	508	NA	promoter-TSS (NM_001305)	promoter-TSS (NM_001305)	-804	NM_001305	1364	Hs.729359	NM_001305	ENSG00000189143	CLDN4	CPE-R|CPER|CPETR|CPETR1|WBSCR8|hCPE-R	claudin 4	protein-coding
chr7	73245028	73245561	82	NA	5' UTR (NM_001305, exon 1 of 1)	5' UTR (NM_001305, exon 1 of 1)	101	NM_001305	1364	Hs.729359	NM_001305	ENSG00000189143	CLDN4	CPE-R|CPER|CPETR|CPETR1|WBSCR8|hCPE-R	claudin 4	protein-coding
chr7	73245028	73245561	54	NA	5' UTR (NM_001305, exon 1 of 1)	5' UTR (NM_001305, exon 1 of 1)	101	NM_001305	1364	Hs.729359	NM_001305	ENSG00000189143	CLDN4	CPE-R|CPER|CPETR|CPETR1|WBSCR8|hCPE-R	claudin 4	protein-coding
chr7	73236787	73237029	42	NA	Intergenic	Intergenic	-8285	NM_001305	1364	Hs.729359	NM_001305	ENSG00000189143	CLDN4	CPE-R|CPER|CPETR|CPETR1|WBSCR8|hCPE-R	claudin 4	protein-coding
chr17	7162231	7162594	35	NA	TTS (NM_001185022)	TTS (NM_001185022)	3852	NM_001307	1366	Hs.513915	XM_005256460	ENSG00000181885	CLDN7	CEPTRL2|CLDN-7|CPETRL2|Hs.84359|claudin-1	claudin 7	protein-coding
chr16	74482551	74483284	148	NA	non-coding (NR_027264, exon 27 of 27)	non-coding (NR_027264, exon 27 of 27)	-27549	NM_001011880	497190	Hs.592064	XM_005255975	ENSG00000140839	CLEC18B	MRCL2	C-type lectin domain family 18, member B	protein-coding
chr16	74482551	74483284	66	NA	non-coding (NR_027264, exon 27 of 27)	non-coding (NR_027264, exon 27 of 27)	-27549	NM_001011880	497190	Hs.592064	XM_005255975	ENSG00000140839	CLEC18B	MRCL2	C-type lectin domain family 18, member B	protein-coding
chr16	19247793	19248243	319	NA	intron (NM_016524, intron 7 of 7)	MER77B|LTR|ERVL	-49087	NM_001256720	728276	Hs.632180	NM_001256720		CLEC19A	-	C-type lectin domain family 19, member A	protein-coding
chr6	45955462	45956046	2084	NA	intron (NM_001114086, intron 1 of 5)	MLT1A-int|LTR|ERVL-MaLR	27872	NM_001256023	53405	Hs.734348	NM_001114086	ENSG00000112782	CLIC5	MST130|MSTP130	chloride intracellular channel 5	protein-coding
chr6	45979080	45979869	1223	NA	intron (NM_001114086, intron 1 of 5)	intron (NM_001114086, intron 1 of 5)	4152	NM_001256023	53405	Hs.734348	NM_001114086	ENSG00000112782	CLIC5	MST130|MSTP130	chloride intracellular channel 5	protein-coding
chr6	45650961	45651620	75	NA	Intergenic	Intergenic	254044	NR_045674	53405	Hs.734348	NM_001114086	ENSG00000112782	CLIC5	MST130|MSTP130	chloride intracellular channel 5	protein-coding
chr5	157376580	157376861	76	NA	Intergenic	MIR3|SINE|MIR	-90537	NM_001195555	9685	Hs.644000	XM_005266013	ENSG00000113282	CLINT1	CLINT|ENTH|EPN4|EPNR	clathrin interactor 1	protein-coding
chr7	73706942	73707580	1683	NA	intron (NM_032421, intron 1 of 15)	intron (NM_032421, intron 1 of 15)	3456	NM_003388	7461	Hs.647018	NM_003388	ENSG00000106665	CLIP2	CLIP|CLIP-115|CYLN2|WBSCR3|WBSCR4|WSCR3|WSCR4	CAP-GLY domain containing linker protein 2	protein-coding
chr7	73699216	73699603	813	NA	Intergenic	Intergenic	-4396	NM_032421	7461	Hs.647018	NM_003388	ENSG00000106665	CLIP2	CLIP|CLIP-115|CYLN2|WBSCR3|WBSCR4|WSCR3|WSCR4	CAP-GLY domain containing linker protein 2	protein-coding
chr14	95715480	95715929	978	NA	intron (NM_024734, intron 1 of 12)	MLT1J-int|LTR|ERVL-MaLR	70541	NM_024734	79789	Hs.301478	XM_005268064	ENSG00000165959	CLMN	-	calmin (calponin-like, transmembrane)	protein-coding
chr14	95739707	95740193	77	NA	intron (NM_024734, intron 1 of 12)	intron (NM_024734, intron 1 of 12)	46295	NM_024734	79789	Hs.301478	XM_005268064	ENSG00000165959	CLMN	-	calmin (calponin-like, transmembrane)	protein-coding
chr14	95731762	95732097	46	NA	intron (NM_024734, intron 1 of 12)	intron (NM_024734, intron 1 of 12)	54316	NM_024734	79789	Hs.301478	XM_005268064	ENSG00000165959	CLMN	-	calmin (calponin-like, transmembrane)	protein-coding
chr11	77387373	77387599	101	NA	intron (NM_016578, intron 13 of 15)	intron (NM_016578, intron 13 of 15)	-38635	NM_001293	1207	Hs.430733	XM_005273760	ENSG00000074201	CLNS1A	CLCI|CLNS1B|ICln	chloride channel, nucleotide-sensitive, 1A	protein-coding
chr11	77354435	77354686	86	NA	Intergenic	MER41-int|LTR|ERV1	-5709	NM_001293	1207	Hs.430733	XM_005273760	ENSG00000074201	CLNS1A	CLCI|CLNS1B|ICln	chloride channel, nucleotide-sensitive, 1A	protein-coding
chr11	72217321	72217627	95	NA	Intergenic	MSTB-int|LTR|ERVL-MaLR	-71750	NM_001258392	81570	Hs.523877	XM_005274320	ENSG00000162129	CLPB	HSP78|SKD3	ClpB caseinolytic peptidase B homolog (E. coli)	protein-coding
chr10	129671110	129671791	2514	NA	Intergenic	MIRb|SINE|MIR	19761	NM_152311	119467	Hs.242014	NM_152311	ENSG00000180745	CLRN3	TMEM12|USH3AL1	clarin 3	protein-coding
chr10	129679313	129680013	1379	NA	intron (NM_152311, intron 2 of 2)	intron (NM_152311, intron 2 of 2)	11548	NM_152311	119467	Hs.242014	NM_152311	ENSG00000180745	CLRN3	TMEM12|USH3AL1	clarin 3	protein-coding
chr10	129690804	129691416	276	NA	5' UTR (NM_152311, exon 1 of 3)	5' UTR (NM_152311, exon 1 of 3)	101	NM_152311	119467	Hs.242014	NM_152311	ENSG00000180745	CLRN3	TMEM12|USH3AL1	clarin 3	protein-coding
chr10	129684836	129685210	207	NA	intron (NM_152311, intron 1 of 2)	intron (NM_152311, intron 1 of 2)	6188	NM_152311	119467	Hs.242014	NM_152311	ENSG00000180745	CLRN3	TMEM12|USH3AL1	clarin 3	protein-coding
chr10	129687134	129687468	66	NA	intron (NM_152311, intron 1 of 2)	intron (NM_152311, intron 1 of 2)	3910	NM_152311	119467	Hs.242014	NM_152311	ENSG00000180745	CLRN3	TMEM12|USH3AL1	clarin 3	protein-coding
chr1	9875273	9875696	137	NA	intron (NM_001009566, intron 1 of 18)	intron (NM_001009566, intron 1 of 18)	9066	NM_001009566	22883	Hs.29665	XM_005263432	ENSG00000171603	CLSTN1	ALC-ALPHA|CDHR12|CSTN1|PIK3CD|XB31alpha|alcalpha1|alcalpha2	calsyntenin 1	protein-coding
chr6	123377948	123378412	146	NA	intron (NM_001010852, intron 5 of 5)	intron (NM_001010852, intron 5 of 5)	61064	NM_001010852	134829	Hs.486362	NM_001010852		CLVS2	C6orf212|C6orf213|RLBP1L2|bA160A10.4	clavesin 2	protein-coding
chr3	28176416	28176877	528	NA	Intergenic	Intergenic	-106478	NM_182523	152100	Hs.444724	XM_005264895		CMC1	C3orf68	C-x(9)-C motif containing 1	protein-coding
chr3	28181702	28182018	191	NA	Intergenic	MIR|SINE|MIR	-101264	NM_182523	152100	Hs.444724	XM_005264895		CMC1	C3orf68	C-x(9)-C motif containing 1	protein-coding
chr3	28282717	28283065	183	NA	promoter-TSS (NM_182523)	promoter-TSS (NM_182523)	-233	NM_182523	152100	Hs.444724	XM_005264895		CMC1	C3orf68	C-x(9)-C motif containing 1	protein-coding
chr3	28092413	28092782	173	NA	Intergenic	Intergenic	-190527	NM_182523	152100	Hs.444724	XM_005264895		CMC1	C3orf68	C-x(9)-C motif containing 1	protein-coding
chr16	81490289	81491027	497	NA	intron (NM_198390, intron 1 of 20)	intron (NM_198390, intron 1 of 20)	11883	NM_198390	80790	Hs.594095	XM_005256179	ENSG00000153815	CMIP	TCMIP	c-Maf inducing protein	protein-coding
chr16	81491333	81491738	228	NA	intron (NM_198390, intron 1 of 20)	intron (NM_198390, intron 1 of 20)	12760	NM_198390	80790	Hs.594095	XM_005256179	ENSG00000153815	CMIP	TCMIP	c-Maf inducing protein	protein-coding
chr16	81485662	81486041	205	NA	intron (NM_198390, intron 1 of 20)	MIRb|SINE|MIR	7076	NM_198390	80790	Hs.594095	XM_005256179	ENSG00000153815	CMIP	TCMIP	c-Maf inducing protein	protein-coding
chr16	81482000	81482380	158	NA	intron (NM_198390, intron 1 of 20)	intron (NM_198390, intron 1 of 20)	3415	NM_198390	80790	Hs.594095	XM_005256179	ENSG00000153815	CMIP	TCMIP	c-Maf inducing protein	protein-coding
chr16	66748897	66749357	175	NA	Intergenic	Intergenic	-18517	NM_178818	146223	Hs.643961	XM_005255809	ENSG00000183723	CMTM4	CKLFSF4	CKLF-like MARVEL transmembrane domain containing 4	protein-coding
chr3	32257621	32257961	259	NA	Intergenic	Intergenic	-22380	NM_178868	152189	Hs.154986	XM_005264897	ENSG00000170293	CMTM8	CKLFSF8|CKLFSF8-V2	CKLF-like MARVEL transmembrane domain containing 8	protein-coding
chr8	87943172	87943910	164	NA	intron (NM_173538, intron 3 of 10)	HERV9-int|LTR|ERV1	64865	NM_173538	168975	Hs.246284	NM_173538	ENSG00000176571	CNBD1	-	cyclic nucleotide binding domain containing 1	protein-coding
chr8	87943172	87943910	83	NA	intron (NM_173538, intron 3 of 10)	HERV9-int|LTR|ERV1	64865	NM_173538	168975	Hs.246284	NM_173538	ENSG00000176571	CNBD1	-	cyclic nucleotide binding domain containing 1	protein-coding
chr18	72209236	72209503	240	NA	intron (NM_032649, intron 1 of 11)	intron (NM_032649, intron 1 of 11)	7677	NM_032649	84735	Hs.400613	NM_032649	ENSG00000150656	CNDP1	CN1|CPGL2|HsT2308	carnosine dipeptidase 1 (metallopeptidase M20 family)	protein-coding
chr16	50069381	50069942	570	NA	non-coding (NR_104043, exon 5 of 5)	non-coding (NR_104043, exon 5 of 5)	10544	NR_104043	255919	Hs.59134	XM_005255887	ENSG00000205423	CNEP1R1	C16orf69|NEP1-R1|TMEM188|TMP125	CTD nuclear envelope phosphatase 1 regulatory subunit 1	protein-coding
chr14	54913955	54914440	344	NA	Intergenic	Intergenic	-6049	NM_005776	10175	Hs.594424	XM_005267248	ENSG00000100528	CNIH1	CNIH|CNIH-1|CNIL|TGAM77	cornichon family AMPA receptor auxiliary protein 1	protein-coding
chr14	54913955	54914440	42	NA	Intergenic	Intergenic	-6049	NM_005776	10175	Hs.594424	XM_005267248	ENSG00000100528	CNIH1	CNIH|CNIH-1|CNIL|TGAM77	cornichon family AMPA receptor auxiliary protein 1	protein-coding
chr1	224832281	224832738	309	NA	intron (NM_152495, intron 1 of 5)	intron (NM_152495, intron 1 of 5)	28330	NM_152495	149111	Hs.731723	XM_005273075	ENSG00000143786	CNIH3	CNIH-3	cornichon family AMPA receptor auxiliary protein 3	protein-coding
chr6	154828485	154829025	114	NA	intron (NM_173515, intron 1 of 12)	intron (NM_173515, intron 1 of 12)	2998	NM_173515	154043	Hs.16064	NM_173515		CNKSR3	MAGI1	CNKSR family member 3	protein-coding
chr6	154890760	154891014	102	NA	Intergenic	MIRc|SINE|MIR	-59134	NM_173515	154043	Hs.16064	NM_173515		CNKSR3	MAGI1	CNKSR family member 3	protein-coding
chr6	154828485	154829025	76	NA	intron (NM_173515, intron 1 of 12)	intron (NM_173515, intron 1 of 12)	2998	NM_173515	154043	Hs.16064	NM_173515		CNKSR3	MAGI1	CNKSR family member 3	protein-coding
chr2	97484859	97485349	569	NA	intron (NM_199078, intron 1 of 6)	intron (NM_199078, intron 1 of 6)	3113	NM_017623	26505	Hs.711617	XM_005263916		CNNM3	ACDP3	cyclin M3	protein-coding
chr2	97432951	97433309	76	NA	intron (NM_020184, intron 1 of 6)	intron (NM_020184, intron 1 of 6)	6491	NM_020184	26504	Hs.175043	XM_005263914	ENSG00000158158	CNNM4	ACDP4	cyclin M4	protein-coding
chr12	70446823	70447155	76	NA	Intergenic	LTR16A|LTR|ERVL	-189785	NM_014515	4848	Hs.730666	NM_001199302	ENSG00000111596	CNOT2	CDC36|NOT2|NOT2H	CCR4-NOT transcription complex, subunit 2	protein-coding
chr17	40141766	40142128	159	NA	intron (NR_029431, intron 5 of 12)	MER58A|DNA|hAT-Charlie	23188	NM_033133	1267	Hs.273621	XM_005257055	ENSG00000173786	CNP	CNP1	2',3'-cyclic nucleotide 3' phosphodiesterase	protein-coding
chr1	246772250	246772458	94	NA	intron (NM_152609, intron 2 of 10)	intron (NM_152609, intron 2 of 10)	42715	NM_152609	163882	Hs.368353	XM_005273081	ENSG00000162852	CNST	C1orf71|PPP1R64	consortin, connexin sorting protein	protein-coding
chr11	58374312	58374820	214	NA	intron (NR_024091, intron 2 of 12)	intron (NR_024091, intron 2 of 12)	-15580	NM_000614	1270	Hs.524920	NM_000614	ENSG00000242689	CNTF	HCNTF	ciliary neurotrophic factor	protein-coding
chr16	76608406	76609050	615	NA	Intergenic	L1MC4a|LINE|L1	264993	NM_138994	85445	Hs.461389	NM_033401	ENSG00000152910	CNTNAP4	CASPR4	contactin associated protein-like 4	protein-coding
chr16	76171904	76172346	84	NA	Intergenic	MER11A|LTR|ERVK	-139051	NM_033401	85445	Hs.461389	NM_033401	ENSG00000152910	CNTNAP4	CASPR4	contactin associated protein-like 4	protein-coding
chr2	125844207	125844508	149	NA	Intergenic	Intergenic	1061493	NM_130773	129684	Hs.660653	NM_130773	ENSG00000155052	CNTNAP5	caspr5	contactin associated protein-like 5	protein-coding
chr7	51383133	51383614	647	NA	intron (NM_001287436, intron 1 of 13)	CpG	1142	NM_015198	23242	Hs.99141	XM_005271749	ENSG00000106078	COBL	-	cordon-bleu WH2 repeat protein	protein-coding
chr7	51674389	51674748	287	NA	Intergenic	MIR|SINE|MIR	-290053	NM_001287436	23242	Hs.99141	XM_005271749	ENSG00000106078	COBL	-	cordon-bleu WH2 repeat protein	protein-coding
chr7	51332925	51333735	220	NA	intron (NM_001287436, intron 1 of 13)	intron (NM_001287436, intron 1 of 13)	51185	NM_015198	23242	Hs.99141	XM_005271749	ENSG00000106078	COBL	-	cordon-bleu WH2 repeat protein	protein-coding
chr7	52214560	52215248	215	NA	Intergenic	Intergenic	-830389	NM_001287436	23242	Hs.99141	XM_005271749	ENSG00000106078	COBL	-	cordon-bleu WH2 repeat protein	protein-coding
chr7	51658964	51659339	211	NA	Intergenic	Intergenic	-274636	NM_001287436	23242	Hs.99141	XM_005271749	ENSG00000106078	COBL	-	cordon-bleu WH2 repeat protein	protein-coding
chr7	51407916	51408425	205	NA	Intergenic	Intergenic	-23655	NM_001287436	23242	Hs.99141	XM_005271749	ENSG00000106078	COBL	-	cordon-bleu WH2 repeat protein	protein-coding
chr7	51913192	51913730	178	NA	Intergenic	MER11A|LTR|ERVK	-528946	NM_001287436	23242	Hs.99141	XM_005271749	ENSG00000106078	COBL	-	cordon-bleu WH2 repeat protein	protein-coding
chr7	52214560	52215248	121	NA	Intergenic	Intergenic	-830389	NM_001287436	23242	Hs.99141	XM_005271749	ENSG00000106078	COBL	-	cordon-bleu WH2 repeat protein	protein-coding
chr7	52191777	52192038	81	NA	Intergenic	MER34A1|LTR|ERV1	-807392	NM_001287436	23242	Hs.99141	XM_005271749	ENSG00000106078	COBL	-	cordon-bleu WH2 repeat protein	protein-coding
chr7	51331352	51331696	78	NA	intron (NM_001287436, intron 1 of 13)	intron (NM_001287436, intron 1 of 13)	52991	NM_015198	23242	Hs.99141	XM_005271749	ENSG00000106078	COBL	-	cordon-bleu WH2 repeat protein	protein-coding
chr17	71199513	71199942	440	NA	intron (NM_018714, intron 8 of 13)	intron (NM_018714, intron 8 of 13)	10554	NM_018714	9382	Hs.103555	XM_005257815	ENSG00000166685	COG1	CDG2G|LDLB	component of oligomeric golgi complex 1	protein-coding
chr6	75244092	75244968	1918	NA	Intergenic	Intergenic	671093	NM_080645	1303	Hs.101302	NM_004370	ENSG00000111799	COL12A1	BA209D8.1|COL12A1L|DJ234P15.1	collagen, type XII, alpha 1	protein-coding
chr6	75580189	75580712	543	NA	Intergenic	Intergenic	335173	NM_080645	1303	Hs.101302	NM_004370	ENSG00000111799	COL12A1	BA209D8.1|COL12A1L|DJ234P15.1	collagen, type XII, alpha 1	protein-coding
chr6	75566930	75567313	287	NA	Intergenic	L4|LINE|RTE	348502	NM_080645	1303	Hs.101302	NM_004370	ENSG00000111799	COL12A1	BA209D8.1|COL12A1L|DJ234P15.1	collagen, type XII, alpha 1	protein-coding
chr6	75244092	75244968	110	NA	Intergenic	Intergenic	671093	NM_080645	1303	Hs.101302	NM_004370	ENSG00000111799	COL12A1	BA209D8.1|COL12A1L|DJ234P15.1	collagen, type XII, alpha 1	protein-coding
chr7	93930306	93930588	159	NA	Intergenic	Intergenic	-93426	NM_000089	1278	Hs.489142	NM_000089	ENSG00000164692	COL1A2	OI4	collagen, type I, alpha 2	protein-coding
chr6	56264065	56264856	627	NA	intron (NR_046940, intron 2 of 5)	LTR22|LTR|ERVK	-152082	NM_030820	81578	Hs.47629	XM_005249431	ENSG00000124749	COL21A1	COLA1L|dJ682J15.1|dJ708F5.1	collagen, type XXI, alpha 1	protein-coding
chr6	56252365	56252795	87	NA	intron (NR_046940, intron 2 of 5)	L1M1|LINE|L1	-140202	NM_030820	81578	Hs.47629	XM_005249431	ENSG00000124749	COL21A1	COLA1L|dJ682J15.1|dJ708F5.1	collagen, type XXI, alpha 1	protein-coding
chr9	116937014	116937291	50	NA	intron (NM_032888, intron 3 of 60)	MIR3|SINE|MIR	18921	NM_032888	85301	Hs.494892	NM_032888		COL27A1	-	collagen, type XXVII, alpha 1	protein-coding
chr7	7556182	7556554	53	NA	intron (NM_001037763, intron 7 of 34)	intron (NM_001037763, intron 7 of 34)	19092	NM_001037763	340267	Hs.491104	NM_001037763	ENSG00000215018	COL28A1	COL28	collagen, type XXVIII, alpha 1	protein-coding
chr13	110858491	110858985	780	NA	intron (NM_001845, intron 15 of 51)	intron (NM_001845, intron 15 of 51)	100758	NM_001845	1282	Hs.17441	NM_001845	ENSG00000187498	COL4A1	HANAC|ICH|POREN1|arresten	collagen, type IV, alpha 1	protein-coding
chr13	111159432	111160252	1315	NA	intron (NM_001846, intron 46 of 47)	L4|LINE|RTE	684	NR_046583	100874203	Hs.508716	NR_046583	ENSG00000232814	COL4A2-AS1	RP11-90L1.7	COL4A2 antisense RNA 1	ncRNA
chr13	111179616	111180355	435	NA	intron (NM_017817, intron 1 of 1)	intron (NM_017817, intron 1 of 1)	-19459	NR_046583	100874203	Hs.508716	NR_046583	ENSG00000232814	COL4A2-AS1	RP11-90L1.7	COL4A2 antisense RNA 1	ncRNA
chr13	111170165	111170376	92	NA	Intergenic	Intergenic	-9744	NR_046583	100874203	Hs.508716	NR_046583	ENSG00000232814	COL4A2-AS1	RP11-90L1.7	COL4A2 antisense RNA 1	ncRNA
chr2	190087313	190087577	101	NA	Intergenic	Intergenic	-42840	NM_000393	1290	Hs.445827	XM_005246283	ENSG00000204262	COL5A2	-	collagen, type V, alpha 2	protein-coding
chr19	10112647	10112973	214	NA	intron (NM_015719, intron 6 of 66)	intron (NM_015719, intron 6 of 66)	8337	NM_015719	50509	Hs.235368	NM_015719	ENSG00000080573	COL5A3	-	collagen, type V, alpha 3	protein-coding
chr2	238197915	238198155	108	NA	Intergenic	Intergenic	124815	NM_057167	1293	Hs.233240	XM_005246065	ENSG00000163359	COL6A3	-	collagen, type VI, alpha 3	protein-coding
chr3	129906785	129907405	491	NA	Intergenic	MER11A|LTR|ERVK	-24568	NR_027898	646300	Hs.170475	NR_027898		COL6A4P2	COL6A4	collagen, type VI, alpha 4 pseudogene 2	pseudo
chr3	99366942	99367295	457	NA	intron (NM_020351, intron 1 of 3)	MIRb|SINE|MIR	9678	NM_001850	1295	Hs.740617	XM_005247098	ENSG00000144810	COL8A1	C3orf7	collagen, type VIII, alpha 1	protein-coding
chr11	111178735	111179508	1632	NA	exon (NM_001271458, exon 5 of 5)	exon (NM_001271458, exon 5 of 5)	-8582	NR_034154	399948	Hs.729225	XR_246432	ENSG00000196167	COLCA1	C11orf92|CASC12	colorectal cancer associated 1	ncRNA
chr1	183962431	183962793	52	NA	intron (NM_015101, intron 1 of 11)	intron (NM_015101, intron 1 of 11)	44251	NM_015101	23127	Hs.387995	XM_005245008	ENSG00000198756	COLGALT2	C1orf17|GLT25D2	collagen beta(1-O)galactosyltransferase 2	protein-coding
chr2	62187088	62187333	66	NA	intron (NM_152516, intron 1 of 2)	LTR10C|LTR|ERV1	54407	NM_152516	150684	Hs.468702	XM_005264157		COMMD1	C2orf5|MURR1	copper metabolism (Murr1) domain containing 1	protein-coding
chr19	18851310	18851601	182	NA	intron (NM_001098482, intron 1 of 14)	MER77|LTR|ERVL	50659	NM_000095	1311	Hs.1584	XM_005259744	ENSG00000105664	COMP	EDM1|EPD1|MED|PSACH|THBS5	cartilage oligomeric matrix protein	protein-coding
chr22	19922898	19923119	69	NA	intron (NM_006440, intron 1 of 17)	MER11A|LTR|ERVK	-6255	NM_000754	1312	Hs.713616	XM_005261229	ENSG00000093010	COMT	-	catechol-O-methyltransferase	protein-coding
chr3	128943708	128944044	129	NA	Intergenic	Intergenic	-24577	NM_016128	22820	Hs.518250	NM_016128	ENSG00000181789	COPG1	COPG	coatomer protein complex, subunit gamma 1	protein-coding
chr4	83955981	83956251	78	NA	promoter-TSS (NM_001258006)	promoter-TSS (NM_001258006)	-123	NM_016129	51138	Hs.190384	NM_001258006	ENSG00000138663	COPS4	CSN4	COP9 signalosome subunit 4	protein-coding
chr2	237933670	237934059	92	NA	Intergenic	L2a|LINE|L2	-60220	NM_198189	10920	Hs.531713	XR_241234		COPS8	COP9|CSN8|SGN8	COP9 signalosome subunit 8	protein-coding
chr4	84211276	84211515	174	NA	Intergenic	THE1B-int|LTR|ERVL-MaLR	-5328	NM_015697	27235	Hs.729069	XM_005262926	ENSG00000173085	COQ2	CL640|COQ10D1|MSA1	coenzyme Q2 4-hydroxybenzoate polyprenyltransferase	protein-coding
chr4	84169937	84170164	65	NA	Intergenic	Intergenic	36017	NM_015697	27235	Hs.729069	XM_005262926	ENSG00000173085	COQ2	CL640|COQ10D1|MSA1	coenzyme Q2 4-hydroxybenzoate polyprenyltransferase	protein-coding
chr12	120966709	120966952	71	NA	exon (NM_032314, exon 1 of 7)	exon (NM_032314, exon 1 of 7)	134	NM_032314	84274	Hs.17250	XM_005253947	ENSG00000110871	COQ5	-	coenzyme Q5 homolog, methyltransferase (S. cerevisiae)	protein-coding
chr16	57466460	57466812	92	NA	intron (NM_020313, intron 5 of 8)	MIR3|SINE|MIR	-14701	NM_020312	57017	Hs.513632	XM_005256060	ENSG00000088682	COQ9	C16orf49|COQ10D5	coenzyme Q9	protein-coding
chr16	30189910	30190354	138	NA	Intergenic	Intergenic	-4599	NM_001193333	11151	Hs.415067	XM_005255052	ENSG00000102879	CORO1A	CLABP|CLIPINA|HCORO1|IMD8|TACO|p57	coronin, actin binding protein, 1A	protein-coding
chr12	109128068	109128487	391	NA	Intergenic	MIRb|SINE|MIR	-2951	NM_014325	23603	Hs.330384	XM_005268762	ENSG00000110880	CORO1C	HCRNN4	coronin, actin binding protein, 1C	protein-coding
chr12	109162016	109162368	50	NA	Intergenic	MIR3|SINE|MIR	-36866	NM_014325	23603	Hs.330384	XM_005268762	ENSG00000110880	CORO1C	HCRNN4	coronin, actin binding protein, 1C	protein-coding
chr9	100908325	100908800	156	NA	intron (NM_003389, intron 2 of 11)	intron (NM_003389, intron 2 of 11)	26612	NM_003389	7464	Hs.113094	NM_003389	ENSG00000106789	CORO2A	CLIPINB|IR10|WDR2	coronin, actin binding protein, 2A	protein-coding
chr9	100952478	100952897	45	NA	intron (NM_052820, intron 1 of 11)	intron (NM_052820, intron 1 of 11)	2269	NM_052820	7464	Hs.113094	NM_003389	ENSG00000106789	CORO2A	CLIPINB|IR10|WDR2	coronin, actin binding protein, 2A	protein-coding
chr16	84603200	84603746	304	NA	intron (NM_021149, intron 3 of 3)	intron (NM_021149, intron 3 of 3)	48229	NM_021149	23406	Hs.289092	NM_021149	ENSG00000103187	COTL1	CLP	coactosin-like 1 (Dictyostelium)	protein-coding
chr12	50504041	50504245	102	NA	3' UTR (NM_001257199, exon 8 of 8)	3' UTR (NM_001257199, exon 8 of 8)	-1621	NM_001257134	84987	Hs.388645	XM_005269199	ENSG00000178449	COX14	C12orf62	cytochrome c oxidase assembly homolog 14 (S. cerevisiae)	protein-coding
chr14	70784760	70785585	1559	NA	Intergenic	Intergenic	41276	NM_001204090	51241	Hs.709581	NM_001204090	ENSG00000133983	COX16	C14orf112	COX16 cytochrome c oxidase assembly homolog (S. cerevisiae)	protein-coding
chr7	1016944	1017506	43	NA	Intergenic	Intergenic	-1990	NM_001031617	90639	Hs.121593	NM_001031617		COX19	-	cytochrome c oxidase assembly homolog 19 (S. cerevisiae)	protein-coding
chr7	1016944	1017506	24	NA	Intergenic	Intergenic	-1990	NM_001031617	90639	Hs.121593	NM_001031617		COX19	-	cytochrome c oxidase assembly homolog 19 (S. cerevisiae)	protein-coding
chr3	148591403	148591748	137	NA	intron (NM_001870, intron 3 of 10)	MIR|SINE|MIR	8532	NM_001870	1359	Hs.646	NM_001870	ENSG00000163751	CPA3	MC-CPA	carboxypeptidase A3 (mast cell)	protein-coding
chr8	68514853	68515240	269	NA	intron (NM_020361, intron 2 of 10)	intron (NM_020361, intron 2 of 10)	143574	NM_020361	57094	Hs.658850	NM_020361	ENSG00000165078	CPA6	CPAH|ETL5|FEB11	carboxypeptidase A6	protein-coding
chr13	46717288	46717689	129	NA	exon (NM_002298, exon 12 of 16)	exon (NM_002298, exon 12 of 16)	-38277	NM_001278541	1361	Hs.512937	XM_005266257	ENSG00000080618	CPB2	CPU|PCPB|TAFI	carboxypeptidase B2 (plasma)	protein-coding
chr17	28732060	28732409	119	NA	intron (NM_001199775, intron 2 of 20)	MER4C|LTR|ERV1	24738	NM_001199775	1362	Hs.446079	NM_001199775	ENSG00000108582	CPD	GP180	carboxypeptidase D	protein-coding
chr4	15111718	15112223	122	NA	Intergenic	Intergenic	107672	NM_001177381	132864	Hs.656937	XM_005248135	ENSG00000137449	CPEB2	CPE-BP2|CPEB-2|hCPEB-2	cytoplasmic polyadenylation element binding protein 2	protein-coding
chr4	14604558	14604930	230	NA	Intergenic	Intergenic	398925	NR_038857	441009	Hs.535004	NR_038857	ENSG00000247624	CPEB2-AS1	AC006296.3	CPEB2 antisense RNA 1 (head to head)	ncRNA
chr5	173312465	173312846	67	NA	Intergenic	Intergenic	-2676	NM_030627	80315	Hs.127126	XM_005265994	ENSG00000113742	CPEB4	-	cytoplasmic polyadenylation element binding protein 4	protein-coding
chr5	175294986	175295494	517	NA	intron (NM_006650, intron 2 of 4)	intron (NM_006650, intron 2 of 4)	-3261	NM_001008220	10814	Hs.193235	XM_005265798	ENSG00000145920	CPLX2	921-L|CPX-2|CPX2|Hfb1	complexin 2	protein-coding
chr6	36797819	36798055	68	NA	intron (NM_020939, intron 1 of 20)	MIRb|SINE|MIR	9283	NM_020939	57699	Hs.657869	XM_005249247	ENSG00000124772	CPNE5	COPN5|CPN5	copine V	protein-coding
chr12	39285730	39286546	4750	NA	intron (NM_153634, intron 1 of 19)	intron (NM_153634, intron 1 of 19)	13282	NM_153634	144402	Hs.40910	XM_005268668	ENSG00000139117	CPNE8	-	copine VIII	protein-coding
chr12	39300348	39300683	193	NA	Intergenic	CpG	-1095	NM_153634	144402	Hs.40910	XM_005268668	ENSG00000139117	CPNE8	-	copine VIII	protein-coding
chr12	39521321	39521558	86	NA	Intergenic	Intergenic	-222019	NM_153634	144402	Hs.40910	XM_005268668	ENSG00000139117	CPNE8	-	copine VIII	protein-coding
chr8	97841574	97842090	31	NA	intron (NM_016134, intron 2 of 7)	intron (NM_016134, intron 2 of 7)	184377	NM_016134	10404	Hs.156178	XM_005250755	ENSG00000104324	CPQ	LDP|PGCP	carboxypeptidase Q	protein-coding
chr2	211958547	211959017	312	NA	Intergenic	Intergenic	476487	NR_002763	29034	Hs.658398	NR_002763		CPS1-IT1	CPS1-IT|CPS1IT|CPS1IT1|PRO0132	CPS1 intronic transcript 1 (non-protein coding)	ncRNA
chr11	68624852	68625364	530	NA	Intergenic	L1MC4a|LINE|L1	-15709	NM_001031847	1374	Hs.503043	XM_005273762	ENSG00000110090	CPT1A	CPT1|CPT1-L|L-CPT1	carnitine palmitoyltransferase 1A (liver)	protein-coding
chr11	68606531	68606949	175	NA	intron (NM_001031847, intron 1 of 18)	CpG	2659	NM_001876	1374	Hs.503043	XM_005273762	ENSG00000110090	CPT1A	CPT1|CPT1-L|L-CPT1	carnitine palmitoyltransferase 1A (liver)	protein-coding
chr1	53649154	53649414	73	NA	Intergenic	MER58A|DNA|hAT-Charlie	-12817	NM_000098	1376	Hs.713535	XM_005270484	ENSG00000157184	CPT2	CPT1|CPTASE|IIAE4	carnitine palmitoyltransferase 2	protein-coding
chr1	207578301	207578595	122	NA	Intergenic	Intergenic	-49197	NM_001006658	1380	Hs.445757	NM_001006658	ENSG00000117322	CR2	C3DR|CD21|CR|CVID7|SLEB9	complement component (3d/Epstein Barr virus) receptor 2	protein-coding
chr15	78667003	78667634	886	NA	Intergenic	Intergenic	34652	NM_004378	1381	Hs.346950	NM_004378	ENSG00000166426	CRABP1	CRABP|CRABP-I|CRABPI|RBP5	cellular retinoic acid binding protein 1	protein-coding
chr1	156675829	156676315	37	NA	promoter-TSS (NM_001878)	promoter-TSS (NM_001878)	-464	NM_001199723	1382	Hs.405662	NM_001199723	ENSG00000143320	CRABP2	CRABP-II|RBP6	cellular retinoic acid binding protein 2	protein-coding
chr9	131872589	131873083	242	NA	promoter-TSS (NM_178003)	promoter-TSS (NM_178003)	234	NM_001257363	1384	Hs.12068	XM_005251706	ENSG00000095321	CRAT	CAT1	carnitine O-acetyltransferase	protein-coding
chr1	152497731	152498181	417	NA	Intergenic	Intergenic	10978	NM_019060	54544	Hs.110196	NM_019060	ENSG00000169509	CRCT1	C1orf42|NICE-1	cysteine-rich C-terminal 1	protein-coding
chr1	152485325	152485944	263	NA	TTS (NM_178438)	TTS (NM_178438)	-1344	NM_019060	54544	Hs.110196	NM_019060	ENSG00000169509	CRCT1	C1orf42|NICE-1	cysteine-rich C-terminal 1	protein-coding
chr2	208392929	208393417	347	NA	Intergenic	L2b|LINE|L2	-1443	NM_134442	1385	Hs.516646	XM_005246323	ENSG00000118260	CREB1	CREB	cAMP responsive element binding protein 1	protein-coding
chr7	137676810	137677279	95	NA	intron (NM_001253775, intron 1 of 3)	intron (NM_001253775, intron 1 of 3)	9803	NM_194071	64764	Hs.490273	XM_005250541	ENSG00000182158	CREB3L2	BBF2H7	cAMP responsive element binding protein 3-like 2	protein-coding
chr19	4145867	4146066	91	NA	Intergenic	Intergenic	-7632	NM_001271995	84699	Hs.247744	XM_005259661	ENSG00000060566	CREB3L3	CREB-H|CREBH	cAMP responsive element binding protein 3-like 3	protein-coding
chr2	101965205	101965713	570	NA	3' UTR (NM_153836, exon 4 of 4)	3' UTR (NM_153836, exon 4 of 4)	38506	NM_153836	200407	Hs.732289	XM_005263898		CREG2	-	cellular repressor of E1A-stimulated genes 2	protein-coding
chr20	5988314	5988559	93	NA	intron (NM_001127458, intron 1 of 6)	intron (NM_001127458, intron 1 of 6)	538	NM_001127458	54675	Hs.743956	XM_005260736	ENSG00000088766	CRLS1	C20orf155|CLS|CLS1|GCD10|dJ967N21.6	cardiolipin synthase 1	protein-coding
chr20	20032832	20033204	86	NA	promoter-TSS (NM_015585)	promoter-TSS (NM_015585)	118	NM_001278628	51340	Hs.171342	NM_001278625	ENSG00000101343	CRNKL1	CLF|CRN|Clf1|HCRN|MSTP021|SYF3	crooked neck pre-mRNA splicing factor 1	protein-coding
chr15	91056809	91057074	135	NA	Intergenic	LTR22B|LTR|ERVK	-16177	NM_001042574	64784	Hs.567572	XM_005254968	ENSG00000140577	CRTC3	TORC-3|TORC3	CREB regulated transcription coactivator 3	protein-coding
chr12	107436391	107436897	518	NA	intron (NM_004075, intron 1 of 12)	L1M2a|LINE|L1	50991	NM_004075	1407	Hs.151573	NM_004075	ENSG00000008405	CRY1	PHLL1	cryptochrome circadian clock 1	protein-coding
chr11	45864788	45865675	1117	NA	Intergenic	Intergenic	-3438	NM_001127457	1408	Hs.532491	NM_001127457	ENSG00000121671	CRY2	HCRY2|PHLL2	cryptochrome circadian clock 2	protein-coding
chr21	44583021	44583249	76	NA	Intergenic	MLT1B|LTR|ERVL-MaLR	-6006	NM_000394	1409	Hs.184085	XM_005261093	ENSG00000160202	CRYAA	CRYA1|CTRCT9|HSPB4	crystallin, alpha A	protein-coding
chr7	151157168	151157472	76	NA	Intergenic	Intergenic	-20221	NM_144727	155051	Hs.647104	XM_005249952	ENSG00000127377	CRYGN	-	crystallin, gamma N	protein-coding
chr1	75214595	75214913	71	NA	intron (NR_027962, intron 4 of 5)	intron (NR_027962, intron 4 of 5)	-15662	NM_001889	1429	Hs.83114	XM_005270491	ENSG00000116791	CRYZ	-	crystallin, zeta (quinone reductase)	protein-coding
chr22	41961455	41961791	106	NA	intron (NM_014460, intron 1 of 3)	intron (NM_014460, intron 1 of 3)	4609	NM_014460	27254	Hs.310893	NM_014460	ENSG00000172346	CSDC2	PIPPIN|dJ347H13.2	cold shock domain containing C2, RNA binding	protein-coding
chr1	110476977	110477479	158	NA	Intergenic	Intergenic	23995	NM_172211	1435	Hs.173894	NM_000757	ENSG00000184371	CSF1	CSF-1|MCSF	colony stimulating factor 1 (macrophage)	protein-coding
chr5	149501660	149502008	146	NA	intron (NM_002609, intron 15 of 22)	intron (NM_002609, intron 15 of 22)	-8899	NM_005211	1436	Hs.586219	XM_005268375	ENSG00000182578	CSF1R	C-FMS|CD115|CSF-1R|CSFR|FIM2|FMS|HDLS|M-CSF-R	colony stimulating factor 1 receptor	protein-coding
chr5	131409104	131409694	188	NA	promoter-TSS (NM_000758)	promoter-TSS (NM_000758)	-86	NM_000758	1437	Hs.1349	NM_000758	ENSG00000164400	CSF2	GMCSF	colony stimulating factor 2 (granulocyte-macrophage)	protein-coding
chr8	19518750	19519154	141	NA	intron (NR_024040, intron 1 of 9)	intron (NR_024040, intron 1 of 9)	21142	NM_018371	55790	Hs.721954	NM_001130518	ENSG00000147408	CSGALNACT1	CSGalNAcT-1|ChGn|beta4GalNAcT	chondroitin sulfate N-acetylgalactosaminyltransferase 1	protein-coding
chr8	4195761	4196280	782	NA	intron (NM_033225, intron 3 of 69)	intron (NM_033225, intron 3 of 69)	656308	NM_033225	64478	Hs.571466	NM_033225	ENSG00000183117	CSMD1	PPP1R24	CUB and Sushi multiple domains 1	protein-coding
chr8	114117433	114117851	708	NA	intron (NM_052900, intron 4 of 68)	L1MEc|LINE|L1	271740	NM_198124	114788	Hs.91381	XM_005250771	ENSG00000164796	CSMD3	-	CUB and Sushi multiple domains 3	protein-coding
chr8	115427061	115427506	469	NA	Intergenic	THE1B-int|LTR|ERVL-MaLR	-978041	NM_198123	114788	Hs.91381	XM_005250771	ENSG00000164796	CSMD3	-	CUB and Sushi multiple domains 3	protein-coding
chr8	115460263	115460601	55	NA	Intergenic	L1MD2|LINE|L1	-1011190	NM_198123	114788	Hs.91381	XM_005250771	ENSG00000164796	CSMD3	-	CUB and Sushi multiple domains 3	protein-coding
chr5	148931048	148931499	105	NA	promoter-TSS (NM_001892)	promoter-TSS (NM_001892)	-158	NM_001271741	1452	Hs.712555	XM_005268376	ENSG00000113712	CSNK1A1	CK1|CK1a|CKIa|HLCDGP1|PRO2975	casein kinase 1, alpha 1	protein-coding
chr17	80225304	80226053	685	NA	intron (NM_001893, intron 1 of 8)	intron (NM_001893, intron 1 of 8)	5916	NM_139062	1453	Hs.631725	XM_005256336	ENSG00000141551	CSNK1D	ASPS|CKIdelta|FASPS2|HCKID	casein kinase 1, delta	protein-coding
chr20	491017	491501	234	NA	intron (NM_001895, intron 1 of 12)	L1MC4|LINE|L1	33223	NM_177560	1457	Hs.644056	NM_001895		CSNK2A1	CK2A1|CKII|CSNK2A3	casein kinase 2, alpha 1 polypeptide	protein-coding
chr3	39195134	39195466	226	NA	promoter-TSS (NM_033027)	promoter-TSS (NM_033027)	-198	NM_033027	64651	Hs.370950	XM_005265403	ENSG00000144655	CSRNP1	AXUD1|CSRNP-1|FAM130B|TAIP-3|URAX1	cysteine-serine-rich nuclear protein 1	protein-coding
chr2	166531360	166531699	214	NA	intron (NM_024969, intron 3 of 4)	intron (NM_024969, intron 3 of 4)	102683	NM_024969	80034	Hs.470479	XM_005246865	ENSG00000178662	CSRNP3	FAM130A2|PPP1R73|TAIP-2|TAIP2	cysteine-serine-rich nuclear protein 3	protein-coding
chr20	18125188	18125727	470	NA	promoter-TSS (NR_028402)	promoter-TSS (NR_028402)	-286	NR_028402	57325	Hs.728790	NM_020536	ENSG00000149474	CSRP2BP	ATAC2|CRP2BP|KAT14|PRO1194|dJ717M23.1	CSRP2 binding protein	protein-coding
chr20	23609521	23609957	162	NA	3' UTR (NM_001288614, exon 4 of 4)	3' UTR (NM_001288614, exon 4 of 4)	8946	NM_000099	1471	Hs.304682	XM_005260672	ENSG00000101439	CST3	ARMD11	cystatin C	protein-coding
chr20	24843153	24843402	188	NA	Intergenic	MER5A|DNA|hAT-Charlie	-86589	NM_003650	8530	Hs.143212	NM_003650	ENSG00000077984	CST7	CMAP	cystatin F (leukocystatin)	protein-coding
chr20	54967390	54967750	331	NA	promoter-TSS (NM_198437)	promoter-TSS (NM_198437)	-4	NM_001324	1477	Hs.172865	NM_001033521	ENSG00000101138	CSTF1	CstF-50|CstFp50	cleavage stimulation factor, 3' pre-RNA, subunit 1, 50kDa	protein-coding
chr11	33204059	33204513	827	NA	intron (NR_034027, intron 1 of 3)	MER77|LTR|ERVL	21083	NR_034027	338739	Hs.423476	XR_242801	ENSG00000247151	CSTF3-AS1	RP11-348A11.4	CSTF3 antisense RNA 1 (head to head)	ncRNA
chr18	20246325	20246859	1675	NA	Intergenic	Intergenic	-248714	NM_172241	64693	Hs.406709	NM_022663	ENSG00000212710	CTAGE1	CT21.1|CT21.2|CTAGE|CTAGE-1|CTAGE-2	cutaneous T-cell lymphoma-associated antigen 1	protein-coding
chr18	20046101	20047105	217	NA	Intergenic	L2b|LINE|L2	-48725	NM_172241	64693	Hs.406709	NM_022663	ENSG00000212710	CTAGE1	CT21.1|CT21.2|CTAGE|CTAGE-1|CTAGE-2	cutaneous T-cell lymphoma-associated antigen 1	protein-coding
chr18	20248033	20248244	48	NA	Intergenic	Intergenic	-250260	NM_172241	64693	Hs.406709	NM_022663	ENSG00000212710	CTAGE1	CT21.1|CT21.2|CTAGE|CTAGE-1|CTAGE-2	cutaneous T-cell lymphoma-associated antigen 1	protein-coding
chr13	75854055	75854288	117	NA	Intergenic	LTR22A|LTR|ERVK	-39654	NR_027466	647288	Hs.567920	NR_027466	ENSG00000214249	CTAGE11P	-	CTAGE family, member 11, pseudogene	pseudo
chr7	143868640	143869219	372	NA	Intergenic	THE1B-int|LTR|ERVL-MaLR	-11619	NM_198495	100128553	Hs.720693	NM_198495	ENSG00000225932	CTAGE4	cTAGE-4	CTAGE family, member 4	protein-coding
chr10	126812109	126812345	66	NA	intron (NM_001083914, intron 1 of 10)	intron (NM_001083914, intron 1 of 10)	36876	NM_001329	1488	Hs.501345	XM_005269560	ENSG00000175029	CTBP2	-	C-terminal binding protein 2	protein-coding
chr5	79449517	79449900	126	NA	intron (NM_178276, intron 8 of 12)	intron (NM_178276, intron 8 of 12)	-70220	NR_109930	101929215		XR_241825	ENSG00000249825	CTD-2201I18.1	-	uncharacterized LOC101929215	ncRNA
chr6	132279877	132280562	934	NA	Intergenic	Intergenic	-7701	NM_001901	1490	Hs.410037	XM_005266827	ENSG00000118523	CTGF	CCN2|HCS24|IGFBP8|NOV2	connective tissue growth factor	protein-coding
chr6	132215999	132216609	400	NA	TTS (NM_006208)	TTS (NM_006208)	56214	NM_001901	1490	Hs.410037	XM_005266827	ENSG00000118523	CTGF	CCN2|HCS24|IGFBP8|NOV2	connective tissue growth factor	protein-coding
chr6	132302056	132302456	131	NA	Intergenic	Intergenic	-29738	NM_001901	1490	Hs.410037	XM_005266827	ENSG00000118523	CTGF	CCN2|HCS24|IGFBP8|NOV2	connective tissue growth factor	protein-coding
chr6	132215999	132216609	44	NA	TTS (NM_006208)	TTS (NM_006208)	56214	NM_001901	1490	Hs.410037	XM_005266827	ENSG00000118523	CTGF	CCN2|HCS24|IGFBP8|NOV2	connective tissue growth factor	protein-coding
chr1	70970135	70970463	253	NA	Intergenic	Intergenic	93398	NM_001902	1491	Hs.19904	XM_005270509	ENSG00000116761	CTH	-	cystathionase (cystathionine gamma-lyase)	protein-coding
chr2	204676213	204676658	490	NA	Intergenic	L2|LINE|L2	-56076	NM_001037631	1493	Hs.247824	XR_241294	ENSG00000163599	CTLA4	CD|CD152|CELIAC3|CTLA-4|GRD4|GSE|IDDM12	cytotoxic T-lymphocyte-associated protein 4	protein-coding
chr2	80556427	80556957	66	NA	intron (NM_001282599, intron 1 of 11)	intron (NM_001282599, intron 1 of 11)	16188	NM_001282599	1496	Hs.167368	XM_005264153	ENSG00000066032	CTNNA2	CAP-R|CAPR|CT114|CTNR	catenin (cadherin-associated protein), alpha 2	protein-coding
chr10	69367287	69367948	115	NA	intron (NM_001127384, intron 2 of 17)	L2a|LINE|L2	57799	NM_001127384	29119	Hs.660362	XM_005269717	ENSG00000183230	CTNNA3	VR22	catenin (cadherin-associated protein), alpha 3	protein-coding
chr10	69252165	69252384	45	NA	intron (NM_001127384, intron 5 of 17)	intron (NM_001127384, intron 5 of 17)	173142	NM_001127384	29119	Hs.660362	XM_005269717	ENSG00000183230	CTNNA3	VR22	catenin (cadherin-associated protein), alpha 3	protein-coding
chr9	111790291	111790543	31	NA	intron (NM_032012, intron 17 of 17)	Tigger4a|DNA|TcMar-Tigger	-14543	NM_001286974	8727	Hs.58488	XM_005252291	ENSG00000119326	CTNNAL1	ACRP|CLLP|alpha-CATU	catenin (cadherin-associated protein), alpha-like 1	protein-coding
chr3	41316355	41316774	459	NA	intron (NM_017886, intron 35 of 36)	intron (NM_017886, intron 35 of 36)	75622	NM_001098209	1499	Hs.476018	XM_005264886	ENSG00000168036	CTNNB1	CTNNB|MRD19|armadillo	catenin (cadherin-associated protein), beta 1, 88kDa	protein-coding
chr3	41013152	41013552	198	NA	Intergenic	Intergenic	-227590	NM_001904	1499	Hs.476018	XM_005264886	ENSG00000168036	CTNNB1	CTNNB|MRD19|armadillo	catenin (cadherin-associated protein), beta 1, 88kDa	protein-coding
chr3	41143490	41143838	188	NA	Intergenic	Intergenic	-97278	NM_001904	1499	Hs.476018	XM_005264886	ENSG00000168036	CTNNB1	CTNNB|MRD19|armadillo	catenin (cadherin-associated protein), beta 1, 88kDa	protein-coding
chr3	41160563	41160847	126	NA	Intergenic	LTR16C|LTR|ERVL	-80237	NM_001904	1499	Hs.476018	XM_005264886	ENSG00000168036	CTNNB1	CTNNB|MRD19|armadillo	catenin (cadherin-associated protein), beta 1, 88kDa	protein-coding
chr3	41289259	41289516	122	NA	intron (NM_017886, intron 36 of 36)	intron (NM_017886, intron 36 of 36)	48445	NM_001098209	1499	Hs.476018	XM_005264886	ENSG00000168036	CTNNB1	CTNNB|MRD19|armadillo	catenin (cadherin-associated protein), beta 1, 88kDa	protein-coding
chr20	36339284	36339872	218	NA	intron (NM_030877, intron 1 of 15)	intron (NM_030877, intron 1 of 15)	17221	NM_030877	56259	Hs.472667	NM_001281495	ENSG00000132792	CTNNBL1	C20orf33|NAP|P14L|PP8304|dJ633O20.1	catenin, beta like 1	protein-coding
chr11	57550535	57551069	349	NA	intron (NM_001085467, intron 1 of 16)	intron (NM_001085467, intron 1 of 16)	21568	NM_001085467	1500	Hs.166011	XM_005273785	ENSG00000198561	CTNND1	CAS|CTNND|P120CAS|P120CTN|p120|p120(CAS)|p120(CTN)	catenin (cadherin-associated protein), delta 1	protein-coding
chr11	57545370	57546359	337	NA	intron (NM_001085467, intron 1 of 16)	intron (NM_001085467, intron 1 of 16)	16630	NM_001085467	1500	Hs.166011	XM_005273785	ENSG00000198561	CTNND1	CAS|CTNND|P120CAS|P120CTN|p120|p120(CAS)|p120(CTN)	catenin (cadherin-associated protein), delta 1	protein-coding
chr11	57566600	57567042	58	NA	intron (NM_001085461, intron 6 of 18)	intron (NM_001085461, intron 6 of 18)	37587	NM_001085467	1500	Hs.166011	XM_005273785	ENSG00000198561	CTNND1	CAS|CTNND|P120CAS|P120CTN|p120|p120(CAS)|p120(CTN)	catenin (cadherin-associated protein), delta 1	protein-coding
chr11	57545370	57546359	52	NA	intron (NM_001085467, intron 1 of 16)	intron (NM_001085467, intron 1 of 16)	16630	NM_001085467	1500	Hs.166011	XM_005273785	ENSG00000198561	CTNND1	CAS|CTNND|P120CAS|P120CTN|p120|p120(CAS)|p120(CTN)	catenin (cadherin-associated protein), delta 1	protein-coding
chr5	11519284	11519602	175	NA	intron (NM_001332, intron 3 of 21)	L2|LINE|L2	69586	NM_001288716	1501	Hs.314543	XM_005248251	ENSG00000169862	CTNND2	GT24|NPRAP	catenin (cadherin-associated protein), delta 2	protein-coding
chr5	11371117	11371540	75	NA	intron (NR_109988, intron 5 of 21)	intron (NR_109988, intron 5 of 21)	217701	NM_001288716	1501	Hs.314543	XM_005248251	ENSG00000169862	CTNND2	GT24|NPRAP	catenin (cadherin-associated protein), delta 2	protein-coding
chr1	41405469	41405769	162	NA	Intergenic	Intergenic	-39388	NM_001905	1503	Hs.473087	XM_005270535	ENSG00000171793	CTPS1	CTPS	CTP synthase 1	protein-coding
chr8	11726182	11726576	161	NA	promoter-TSS (NM_147782)	promoter-TSS (NM_147782)	-733	NM_147782	1508	Hs.520898	XM_005272367	ENSG00000164733	CTSB	APPS|CPSB	cathepsin B	protein-coding
chr8	11711542	11711864	103	NA	intron (NM_001908, intron 1 of 9)	intron (NM_001908, intron 1 of 9)	13943	NM_147781	1508	Hs.520898	XM_005272367	ENSG00000164733	CTSB	APPS|CPSB	cathepsin B	protein-coding
chr15	79242640	79242932	84	NA	Intergenic	Intergenic	-5366	NM_004390	1512	Hs.148641	XM_005254180		CTSH	ACC-4|ACC-5|CPSB|minichain	cathepsin H	protein-coding
chr7	117322824	117323191	52	NA	Intergenic	Intergenic	190554	NM_033427	83992	Hs.592285	XM_005250634	ENSG00000077063	CTTNBP2	C7orf8|CORTBP2|Orf4	cortactin binding protein 2	protein-coding
chr5	126981148	126981442	137	NA	Intergenic	Intergenic	-3418	NM_001048252	613212	Hs.66194	NM_001048252	ENSG00000205279	CTXN3	KABE	cortexin 3	protein-coding
chr10	17143888	17144250	75	NA	intron (NM_001081, intron 13 of 66)	intron (NM_001081, intron 13 of 66)	27747	NM_001081	8029	Hs.166206	NM_001081	ENSG00000107611	CUBN	IFCR|MGA1|gp280	cubilin (intrinsic factor-cobalamin receptor)	protein-coding
chr17	56015360	56015767	349	NA	intron (NM_001271875, intron 1 of 10)	intron (NM_001271875, intron 1 of 10)	17121	NM_001271875	404093	Hs.46679	NM_001271875	ENSG00000180891	CUEDC1	-	CUE domain containing 1	protein-coding
chr17	55956618	55957426	312	NA	exon (NM_001271875, exon 3 of 11)	exon (NM_001271875, exon 3 of 11)	23728	NR_073495	404093	Hs.46679	NM_001271875	ENSG00000180891	CUEDC1	-	CUE domain containing 1	protein-coding
chr2	225641434	225642123	572	NA	intron (NM_014689, intron 51 of 55)	L2c|LINE|L2	-191664	NM_001257197	8452	Hs.372286	XM_005246912	ENSG00000036257	CUL3	CUL-3|PHA2E	cullin 3	protein-coding
chr7	101500232	101500534	114	NA	intron (NM_181552, intron 1 of 23)	intron (NM_181552, intron 1 of 23)	39501	NM_181552	1523	Hs.191482	XM_005250150	ENSG00000257923	CUX1	CASP|CDP|CDP/Cut|CDP1|COY1|CUTL1|CUX|Clox|Cux/CDP|GOLIM6|Nbla10317|p100|p110|p200|p75	cut-like homeobox 1	protein-coding
chr21	18895266	18895670	325	NA	intron (NM_001207063, intron 1 of 4)	intron (NM_001207063, intron 1 of 4)	10244	NM_001207063	1525	Hs.627078	XM_005260928	ENSG00000154639	CXADR	CAR|CAR4/6|HCAR	coxsackie virus and adenovirus receptor	protein-coding
chr4	74761530	74761849	182	NA	Intergenic	Intergenic	26580	NR_046035	2919	Hs.708652	NM_001511	ENSG00000163739	CXCL1	FSP|GRO1|GROa|MGSA|MGSA-a|NAP-3|SCYB1	chemokine (C-X-C motif) ligand 1 (melanoma growth stimulating activity, alpha)	protein-coding
chr4	78552575	78552969	323	NA	Intergenic	HERVL18-int|LTR|ERVL	119865	NM_006419	10563	Hs.100431	NM_006419	ENSG00000156234	CXCL13	ANGIE|ANGIE2|BCA-1|BCA1|BLC|BLR1L|SCYB13	chemokine (C-X-C motif) ligand 13	protein-coding
chr4	78459861	78460116	94	NA	intron (NM_006419, intron 1 of 4)	intron (NM_006419, intron 1 of 4)	27081	NM_006419	10563	Hs.100431	NM_006419	ENSG00000156234	CXCL13	ANGIE|ANGIE2|BCA-1|BCA1|BLC|BLR1L|SCYB13	chemokine (C-X-C motif) ligand 13	protein-coding
chr4	78485684	78485950	61	NA	intron (NM_006419, intron 1 of 4)	MIR|SINE|MIR	52910	NM_006419	10563	Hs.100431	NM_006419	ENSG00000156234	CXCL13	ANGIE|ANGIE2|BCA-1|BCA1|BLC|BLR1L|SCYB13	chemokine (C-X-C motif) ligand 13	protein-coding
chr19	42954375	42954883	701	NA	intron (NR_073179, intron 1 of 1)	intron (NR_073179, intron 1 of 1)	-7493	NM_198477	284340	Hs.445586	NM_198477		CXCL17	DMC|Dcip1|UNQ473|VCC-1|VCC1	chemokine (C-X-C motif) ligand 17	protein-coding
chr19	42947980	42948454	556	NA	intron (NR_073179, intron 1 of 1)	intron (NR_073179, intron 1 of 1)	-1081	NM_198477	284340	Hs.445586	NM_198477		CXCL17	DMC|Dcip1|UNQ473|VCC-1|VCC1	chemokine (C-X-C motif) ligand 17	protein-coding
chr4	105415298	105415852	418	NA	intron (NM_025212, intron 1 of 2)	intron (NM_025212, intron 1 of 2)	483	NM_025212	80319	Hs.12248	NM_025212	ENSG00000168772	CXXC4	IDAX	CXXC finger protein 4	protein-coding
chr4	105337869	105338233	256	NA	Intergenic	Charlie17a|DNA|hAT-Charlie	78007	NM_025212	80319	Hs.12248	NM_025212	ENSG00000168772	CXXC4	IDAX	CXXC finger protein 4	protein-coding
chr4	105649656	105649912	86	NA	Intergenic	Intergenic	-233726	NM_025212	80319	Hs.12248	NM_025212	ENSG00000168772	CXXC4	IDAX	CXXC finger protein 4	protein-coding
chr5	139022778	139023162	28	NA	Intergenic	Intergenic	-5331	NM_016463	51523	Hs.744933	XM_005268461	ENSG00000171604	CXXC5	CF5|RINF|WID	CXXC finger protein 5	protein-coding
chr17	61509660	61510069	180	NA	3' UTR (NM_001017917, exon 6 of 6)	3' UTR (NM_001017917, exon 6 of 6)	8343	NM_001017917	1534	Hs.355264	XM_005257090	ENSG00000008283	CYB561	CYB561A1|FRRS2	cytochrome b561	protein-coding
chr18	71901582	71901858	119	NA	Intergenic	Intergenic	57531	NM_001914	1528	Hs.465413	XR_245456	ENSG00000166347	CYB5A	CYB5|MCB5	cytochrome b5 type A (microsomal)	protein-coding
chr22	43044378	43044822	174	NA	intron (NM_000398, intron 1 of 8)	MIRb|SINE|MIR	805	NM_000398	1727	Hs.561064	NM_000398	ENSG00000100243	CYB5R3	B5R|DIA1	cytochrome b5 reductase 3	protein-coding
chr7	25164872	25165470	83	NA	promoter-TSS (NM_018947)	promoter-TSS (NM_018947)	-191	NM_018947	54205	Hs.617193	NM_018947		CYCS	CYC|HCS|THC4	cytochrome c, somatic	protein-coding
chr15	22977033	22977562	116	NA	intron (NM_014608, intron 22 of 30)	MER77B|LTR|ERVL	21542	NM_001033028	23191	Hs.26704	XM_005272542	ENSG00000068793	CYFIP1	P140SRA-1|SHYC|SRA-1|SRA1	cytoplasmic FMR1 interacting protein 1	protein-coding
chr15	22977033	22977562	67	NA	intron (NM_014608, intron 22 of 30)	MER77B|LTR|ERVL	21542	NM_001033028	23191	Hs.26704	XM_005272542	ENSG00000068793	CYFIP1	P140SRA-1|SHYC|SRA-1|SRA1	cytoplasmic FMR1 interacting protein 1	protein-coding
chr2	219613516	219613915	331	NA	intron (NM_014640, intron 13 of 19)	intron (NM_014640, intron 13 of 19)	-32757	NM_000784	1593	Hs.516700	NM_000784	ENSG00000135929	CYP27A1	CP27|CTX|CYP27	cytochrome P450, family 27, subfamily A, polypeptide 1	protein-coding
chr2	219645534	219646129	60	NA	promoter-TSS (NM_000784)	promoter-TSS (NM_000784)	-641	NM_000784	1593	Hs.516700	NM_000784	ENSG00000135929	CYP27A1	CP27|CTX|CYP27	cytochrome P450, family 27, subfamily A, polypeptide 1	protein-coding
chr19	41485950	41486519	195	NA	Intergenic	THE1B-int|LTR|ERVL-MaLR	-10970	NM_000767	1555	Hs.1360	XM_005258569	ENSG00000197408	CYP2B6	CPB6|CYP2B|CYP2B7|CYP2B7P|CYPIIB6|EFVM|IIB1|P450	cytochrome P450, family 2, subfamily B, polypeptide 6	protein-coding
chr19	41496762	41497172	191	NA	promoter-TSS (NM_000767)	promoter-TSS (NM_000767)	-237	NM_000767	1555	Hs.1360	XM_005258569	ENSG00000197408	CYP2B6	CPB6|CYP2B|CYP2B7|CYP2B7P|CYPIIB6|EFVM|IIB1|P450	cytochrome P450, family 2, subfamily B, polypeptide 6	protein-coding
chr19	41426907	41427573	400	NA	Intergenic	Intergenic	-2930	NR_001278	1556	Hs.529117	NR_001278	ENSG00000256612	CYP2B7P	CYP2B|CYP2B7|CYP2B7P1	cytochrome P450, family 2, subfamily B, polypeptide 7, pseudogene	pseudo
chr19	41425788	41426034	48	NA	Intergenic	MER11A|LTR|ERVK	-4259	NR_001278	1556	Hs.529117	NR_001278	ENSG00000256612	CYP2B7P	CYP2B|CYP2B7|CYP2B7P1	cytochrome P450, family 2, subfamily B, polypeptide 7, pseudogene	pseudo
chr10	96437420	96437797	304	NA	Intergenic	Intergenic	-5643	NM_001128925	1562	Hs.511872	XM_005269576	ENSG00000108242	CYP2C18	CPCI|CYP2C|CYP2C17|P450-6B/29C|P450IIC17	cytochrome P450, family 2, subfamily C, polypeptide 18	protein-coding
chr10	96440241	96440572	112	NA	Intergenic	Intergenic	-2845	NM_001128925	1562	Hs.511872	XM_005269576	ENSG00000108242	CYP2C18	CPCI|CYP2C|CYP2C17|P450-6B/29C|P450IIC17	cytochrome P450, family 2, subfamily C, polypeptide 18	protein-coding
chr11	14883199	14883453	46	NA	intron (NM_000922, intron 14 of 15)	MER50|LTR|ERV1	30425	NM_024514	120227	Hs.371427	XM_005252788	ENSG00000186104	CYP2R1	-	cytochrome P450, family 2, subfamily R, polypeptide 1	protein-coding
chr19	41672890	41673586	734	NA	Intergenic	Intergenic	-25877	NM_030622	29785	Hs.98370	NM_030622	ENSG00000167600	CYP2S1	-	cytochrome P450, family 2, subfamily S, polypeptide 1	protein-coding
chr19	41665028	41665346	96	NA	Intergenic	MER77|LTR|ERVL	-33928	NM_030622	29785	Hs.98370	NM_030622	ENSG00000167600	CYP2S1	-	cytochrome P450, family 2, subfamily S, polypeptide 1	protein-coding
chr19	41698563	41699025	89	NA	promoter-TSS (NM_030622)	promoter-TSS (NM_030622)	-321	NM_030622	29785	Hs.98370	NM_030622	ENSG00000167600	CYP2S1	-	cytochrome P450, family 2, subfamily S, polypeptide 1	protein-coding
chr7	99292087	99292712	112	NA	intron (NM_001256497, intron 14 of 14)	intron (NM_001256497, intron 14 of 14)	-14778	NR_033810	1577	Hs.571258	XM_005250169	ENSG00000106258	CYP3A5	CP35|CYPIIIA5|P450PCN3|PCN3	cytochrome P450, family 3, subfamily A, polypeptide 5	protein-coding
chr7	99317917	99318247	122	NA	intron (NM_000765, intron 3 of 12)	intron (NM_000765, intron 3 of 12)	14737	NM_000765	1551	Hs.111944	XM_005250168	ENSG00000160870	CYP3A7	CP37|CYPIIIA7|P450-HFLA	cytochrome P450, family 3, subfamily A, polypeptide 7	protein-coding
chr19	15783303	15784296	863	NA	promoter-TSS (NM_023944)	promoter-TSS (NM_023944)	-29	NM_023944	66002	Hs.131459	XM_005260037	ENSG00000186204	CYP4F12	F22329_1	cytochrome P450, family 4, subfamily F, polypeptide 12	protein-coding
chr19	15751314	15752333	950	NA	intron (NM_000896, intron 1 of 12)	intron (NM_000896, intron 1 of 12)	116	NM_001199208	4051	Hs.106242	XM_005259910	ENSG00000186529	CYP4F3	CPF3|CYP4F|LTB4H	cytochrome P450, family 4, subfamily F, polypeptide 3	protein-coding
chr19	15751314	15752333	120	NA	intron (NM_000896, intron 1 of 12)	intron (NM_000896, intron 1 of 12)	116	NM_001199208	4051	Hs.106242	XM_005259910	ENSG00000186529	CYP4F3	CPF3|CYP4F|LTB4H	cytochrome P450, family 4, subfamily F, polypeptide 3	protein-coding
chr19	15733887	15734317	367	NA	exon (NM_007253, exon 7 of 13)	exon (NM_007253, exon 7 of 13)	8073	NM_007253	11283	Hs.268554	NM_007253		CYP4F8	CPF8|CYPIVF8	cytochrome P450, family 4, subfamily F, polypeptide 8	protein-coding
chr7	91671274	91671928	1083	NA	intron (NM_147185, intron 19 of 49)	intron (NM_147185, intron 19 of 49)	92239	NM_000786	1595	Hs.417077	NM_000786	ENSG00000001630	CYP51A1	CP51|CYP51|CYPL1|LDM|P450-14DM|P450L1	cytochrome P450, family 51, subfamily A, polypeptide 1	protein-coding
chr8	65877344	65877615	102	NA	Intergenic	Intergenic	-166131	NM_004820	9420	Hs.667720	NM_004820	ENSG00000172817	CYP7B1	CBAS3|CP7B|SPG5A	cytochrome P450, family 7, subfamily B, polypeptide 1	protein-coding
chr3	42897245	42897695	102	NA	intron (NM_001296, intron 2 of 2)	intron (NM_001296, intron 2 of 2)	20163	NM_004391	1582	Hs.722743	NM_004391	ENSG00000180432	CYP8B1	CP8B|CYP12	cytochrome P450, family 8, subfamily B, polypeptide 1	protein-coding
chr1	86072814	86073370	76	NA	Intergenic	Intergenic	26648	NM_001554	3491	Hs.8867	NM_001554	ENSG00000142871	CYR61	CCN1|GIG1|IGFBP10	cysteine-rich, angiogenic inducer, 61	protein-coding
chr17	76704632	76704844	95	NA	intron (NM_004762, intron 2 of 12)	intron (NM_004762, intron 2 of 12)	73638	NM_017456	9267	Hs.191215	NM_004762	ENSG00000108669	CYTH1	B2-1|CYTOHESIN-1|D17S811E|PSCD1|SEC7	cytohesin 1	protein-coding
chr19	48990814	48991395	217	NA	intron (NM_001080434, intron 15 of 15)	intron (NM_001080434, intron 15 of 15)	18639	NM_017457	9266	Hs.144011	NM_004228	ENSG00000105443	CYTH2	ARNO|CTS18|CTS18.1|PSCD2|PSCD2L|SEC7L|Sec7p-L|Sec7p-like	cytohesin 2	protein-coding
chr22	37719413	37720147	705	NA	Intergenic	L1ME4a|LINE|L1	41285	NM_013385	27128	Hs.170944	XM_005261567	ENSG00000100055	CYTH4	CYT4|DJ63G5.1|PSCD4	cytohesin 4	protein-coding
chr22	37722800	37723168	549	NA	Intergenic	Intergenic	44489	NM_013385	27128	Hs.170944	XM_005261567	ENSG00000100055	CYTH4	CYT4|DJ63G5.1|PSCD4	cytohesin 4	protein-coding
chr1	58507349	58507891	501	NA	intron (NM_021080, intron 1 of 16)	intron (NM_021080, intron 1 of 16)	181405	NR_104364	101926890	Hs.662207	XR_246326		DAB1-AS1	-	DAB1 antisense RNA 1	ncRNA
chr5	39448171	39448982	241	NA	Intergenic	Intergenic	-23241	NM_001343	1601	Hs.696631	XM_005248260	ENSG00000153071	DAB2	DOC-2|DOC2	Dab, mitogen-responsive phosphoprotein, homolog 2 (Drosophila)	protein-coding
chr5	39437606	39437830	81	NA	Intergenic	Intergenic	-12383	NM_001343	1601	Hs.696631	XM_005248260	ENSG00000153071	DAB2	DOC-2|DOC2	Dab, mitogen-responsive phosphoprotein, homolog 2 (Drosophila)	protein-coding
chr5	39448171	39448982	58	NA	Intergenic	Intergenic	-23241	NM_001343	1601	Hs.696631	XM_005248260	ENSG00000153071	DAB2	DOC-2|DOC2	Dab, mitogen-responsive phosphoprotein, homolog 2 (Drosophila)	protein-coding
chr9	124412541	124413910	1783	NA	intron (NM_032552, intron 1 of 16)	intron (NM_032552, intron 1 of 16)	83844	NM_032552	153090	Hs.522378	XM_005251719	ENSG00000136848	DAB2IP	AF9Q34|AIP-1|AIP1|DIP1/2	DAB2 interacting protein	protein-coding
chr9	124675381	124675900	209	NA	intron (NM_001139442, intron 6 of 8)	intron (NM_001139442, intron 6 of 8)	170576	NM_138709	153090	Hs.522378	XM_005251719	ENSG00000136848	DAB2IP	AF9Q34|AIP-1|AIP1|DIP1/2	DAB2 interacting protein	protein-coding
chr9	124372167	124372528	139	NA	intron (NM_032552, intron 1 of 16)	(TG)n|Simple_repeat|Simple_repeat	42966	NM_032552	153090	Hs.522378	XM_005251719	ENSG00000136848	DAB2IP	AF9Q34|AIP-1|AIP1|DIP1/2	DAB2 interacting protein	protein-coding
chr9	124412541	124413910	110	NA	intron (NM_032552, intron 1 of 16)	intron (NM_032552, intron 1 of 16)	83844	NM_032552	153090	Hs.522378	XM_005251719	ENSG00000136848	DAB2IP	AF9Q34|AIP-1|AIP1|DIP1/2	DAB2 interacting protein	protein-coding
chr9	124429625	124429948	106	NA	intron (NM_032552, intron 1 of 16)	AluSq|SINE|Alu	-75278	NM_138709	153090	Hs.522378	XM_005251719	ENSG00000136848	DAB2IP	AF9Q34|AIP-1|AIP1|DIP1/2	DAB2 interacting protein	protein-coding
chrX	85625301	85625681	50	NA	intron (NM_001139515, intron 1 of 11)	intron (NM_001139515, intron 1 of 11)	107520	NM_001139515	117154	Hs.86603	XM_005262068	ENSG00000126733	DACH2	-	dachshund homolog 2 (Drosophila)	protein-coding
chr14	59296299	59296742	270	NA	Intergenic	Intergenic	190965	NR_046095	51339	Hs.714204	NM_001079520	ENSG00000165617	DACT1	DAPPER|DAPPER1|DPR1|FRODO|HDPR1|THYEX3	dishevelled-binding antagonist of beta-catenin 1	protein-coding
chr6	168662542	168663105	490	NA	Intergenic	Intergenic	57611	NM_001286351	168002	Hs.673059	XM_005266837	ENSG00000164488	DACT2	C6orf116|DAPPER2|DPR2|RP11-503C24.7|bA503C24.7	dishevelled-binding antagonist of beta-catenin 2	protein-coding
chr14	22990863	22991150	187	NA	Intergenic	Intergenic	67137	NM_001344	1603	Hs.82890	NM_001344	ENSG00000129562	DAD1	OST2	defender against cell death 1	protein-coding
chr14	23055104	23055329	60	NA	intron (NM_001344, intron 1 of 2)	AluSp|SINE|Alu	2927	NM_001344	1603	Hs.82890	NM_001344	ENSG00000129562	DAD1	OST2	defender against cell death 1	protein-coding
chr11	61434483	61434709	71	NA	Intergenic	Intergenic	-13309	NM_006133	747	Hs.241564	XM_005274230	ENSG00000134780	DAGLA	C11orf11|DAGL(ALPHA)|DAGLALPHA|NSDDR	diacylglycerol lipase, alpha	protein-coding
chr13	106041921	106042202	66	NA	Intergenic	Intergenic	-76155	NM_001161814	267012	Hs.381382	XM_005254042	ENSG00000182346	DAOA	LG72|SG72	D-amino acid oxidase activator	protein-coding
chr9	90184931	90185317	373	NA	intron (NM_001288730, intron 2 of 25)	intron (NM_001288730, intron 2 of 25)	71674	NM_001288729	1612	Hs.693441	XM_005251755	ENSG00000196730	DAPK1	DAPK	death-associated protein kinase 1	protein-coding
chr9	90184129	90184368	78	NA	intron (NM_001288730, intron 2 of 25)	MER5A|DNA|hAT-Charlie	70798	NM_001288729	1612	Hs.693441	XM_005251755	ENSG00000196730	DAPK1	DAPK	death-associated protein kinase 1	protein-coding
chr15	64292304	64292805	399	NA	intron (NM_014326, intron 2 of 11)	intron (NM_014326, intron 2 of 11)	45967	NM_014326	23604	Hs.237886	XM_005254265	ENSG00000035664	DAPK2	DRP-1|DRP1	death-associated protein kinase 2	protein-coding
chr15	64262261	64262562	253	NA	intron (NM_014326, intron 4 of 11)	L2b|LINE|L2	76110	NM_014326	23604	Hs.237886	XM_005254265	ENSG00000035664	DAPK2	DRP-1|DRP1	death-associated protein kinase 2	protein-coding
chr15	64265672	64265947	140	NA	intron (NM_014326, intron 3 of 11)	MLT1A0-int|LTR|ERVL-MaLR	72712	NM_014326	23604	Hs.237886	XM_005254265	ENSG00000035664	DAPK2	DRP-1|DRP1	death-associated protein kinase 2	protein-coding
chr19	3966384	3966837	367	NA	intron (NM_001348, intron 1 of 7)	intron (NM_001348, intron 1 of 7)	3216	NM_001348	1613	Hs.631844	XM_005259508	ENSG00000167657	DAPK3	ZIP|ZIPK	death-associated protein kinase 3	protein-coding
chr2	159724931	159725542	152	NA	Intergenic	HERVE-int|LTR|ERV1	73407	NM_001017920	92196	Hs.59761	XM_005246949	ENSG00000163331	DAPL1	-	death associated protein-like 1	protein-coding
chr19	49136731	49136946	96	NA	exon (NM_001352, exon 3 of 4)	exon (NM_001352, exon 3 of 4)	3801	NM_001352	1628	Hs.528006	XR_243907		DBP	DABP	D site of albumin promoter (albumin D-box) binding protein	protein-coding
chr2	172290314	172290542	108	NA	promoter-TSS (NM_001164821)	promoter-TSS (NM_001164821)	-333	NM_025000	80067	Hs.659439	NM_001164821	ENSG00000115827	DCAF17	C2orf37	DDB1 and CUL4 associated factor 17	protein-coding
chrX	28005922	28006561	412	NA	Intergenic	LTR22A|LTR|ERVK	-6675	NM_001017930	139425	Hs.447365	NM_001017930	ENSG00000226372	DCAF8L1	WDR42B	DDB1 and CUL4 associated factor 8-like 1	protein-coding
chrX	28243650	28243972	171	NA	Intergenic	Intergenic	-244245	NM_001017930	139425	Hs.447365	NM_001017930	ENSG00000226372	DCAF8L1	WDR42B	DDB1 and CUL4 associated factor 8-like 1	protein-coding
chr6	117777457	117777797	170	NA	Intergenic	Intergenic	-26193	NM_173674	285761	Hs.658304	XM_005266941	ENSG00000164465	DCBLD1	dJ94G16.1	discoidin, CUB and LCCL domain containing 1	protein-coding
chr6	117778195	117778657	152	NA	Intergenic	Intergenic	-25394	NM_173674	285761	Hs.658304	XM_005266941	ENSG00000164465	DCBLD1	dJ94G16.1	discoidin, CUB and LCCL domain containing 1	protein-coding
chr6	117815558	117816220	137	NA	intron (NM_173674, intron 1 of 14)	intron (NM_173674, intron 1 of 14)	12069	NM_173674	285761	Hs.658304	XM_005266941	ENSG00000164465	DCBLD1	dJ94G16.1	discoidin, CUB and LCCL domain containing 1	protein-coding
chr6	117825967	117826176	81	NA	intron (NM_173674, intron 2 of 14)	intron (NM_173674, intron 2 of 14)	22251	NM_173674	285761	Hs.658304	XM_005266941	ENSG00000164465	DCBLD1	dJ94G16.1	discoidin, CUB and LCCL domain containing 1	protein-coding
chr18	49596592	49597155	371	NA	Intergenic	MIR|SINE|MIR	-269669	NM_005215	1630	Hs.162025	XM_005258204		DCC	CRC18|CRCR1|IGDCC1|MRMV1	deleted in colorectal carcinoma	protein-coding
chr18	49839683	49840117	162	NA	Intergenic	Intergenic	-26642	NM_005215	1630	Hs.162025	XM_005258204		DCC	CRC18|CRCR1|IGDCC1|MRMV1	deleted in colorectal carcinoma	protein-coding
chr4	150442755	150443173	263	NA	Intergenic	Intergenic	-556462	NM_001040260	166614	Hs.591683	XM_005262785	ENSG00000170390	DCLK2	CL2|CLICK-II|CLICK2|CLIK2|DCAMKL2|DCDC3|DCDC3B|DCK2	doublecortin-like kinase 2	protein-coding
chr4	150414699	150415010	214	NA	Intergenic	Intergenic	-584572	NM_001040260	166614	Hs.591683	XM_005262785	ENSG00000170390	DCLK2	CL2|CLICK-II|CLICK2|CLIK2|DCAMKL2|DCDC3|DCDC3B|DCK2	doublecortin-like kinase 2	protein-coding
chr4	151178470	151178805	149	NA	TTS (NR_036614)	TTS (NR_036614)	179211	NR_036614	166614	Hs.591683	XM_005262785	ENSG00000170390	DCLK2	CL2|CLICK-II|CLICK2|CLIK2|DCAMKL2|DCDC3|DCDC3B|DCK2	doublecortin-like kinase 2	protein-coding
chr10	14995986	14996361	145	NA	non-coding (NR_110297, exon 1 of 17)	non-coding (NR_110297, exon 1 of 17)	258	NM_001033857	64421	Hs.656065	XM_005252555	ENSG00000152457	DCLRE1C	A-SCID|DCLREC1C|RS-SCID|SCIDA|SNM1C	DNA cross-link repair 1C	protein-coding
chr4	52775159	52775859	1205	NA	intron (NM_015115, intron 8 of 9)	intron (NM_015115, intron 8 of 9)	65764	NM_001287755	23142	Hs.605388	XM_005265730	ENSG00000109184	DCUN1D4	-	DCN1, defective in cullin neddylation 1, domain containing 4	protein-coding
chr4	52719348	52719655	58	NA	intron (NM_001287757, intron 2 of 11)	intron (NM_001287757, intron 2 of 11)	9756	NM_001287755	23142	Hs.605388	XM_005265730	ENSG00000109184	DCUN1D4	-	DCN1, defective in cullin neddylation 1, domain containing 4	protein-coding
chr1	85926136	85926870	477	NA	intron (NM_001134445, intron 2 of 6)	intron (NM_001134445, intron 2 of 6)	4386	NM_012137	23576	Hs.713411	XM_005270706	ENSG00000153904	DDAH1	DDAH|HEL-S-16	dimethylarginine dimethylaminohydrolase 1	protein-coding
chr11	47234566	47234766	103	NA	Intergenic	Intergenic	-1827	NM_000107	1643	Hs.700338	XM_005252807	ENSG00000134574	DDB2	DDBB|UV-DDB2	damage-specific DNA binding protein 2, 48kDa	protein-coding
chr11	47238037	47238283	49	NA	intron (NM_000107, intron 2 of 9)	intron (NM_000107, intron 2 of 9)	1667	NM_000107	1643	Hs.700338	XM_005252807	ENSG00000134574	DDB2	DDBB|UV-DDB2	damage-specific DNA binding protein 2, 48kDa	protein-coding
chr7	50682536	50683217	492	NA	intron (NM_001001549, intron 7 of 14)	intron (NM_001001549, intron 7 of 14)	-49722	NM_001082971	1644	Hs.359698	XM_005271744	ENSG00000132437	DDC	AADC	dopa decarboxylase (aromatic L-amino acid decarboxylase)	protein-coding
chr7	50632962	50633277	58	NA	promoter-TSS (NM_001082971)	promoter-TSS (NM_001082971)	35	NM_001082971	1644	Hs.359698	XM_005271744	ENSG00000132437	DDC	AADC	dopa decarboxylase (aromatic L-amino acid decarboxylase)	protein-coding
chr10	74068393	74068736	199	NA	Intergenic	Intergenic	34887	NM_019058	54541	Hs.744875	NM_019058	ENSG00000168209	DDIT4	Dig2|REDD-1|REDD1	DNA-damage-inducible transcript 4	protein-coding
chr4	101151858	101152134	137	NA	Intergenic	MER11A|LTR|ERVK	-40341	NM_145244	115265	Hs.480378	XM_005262721	ENSG00000145358	DDIT4L	REDD2|Rtp801L	DNA-damage-inducible transcript 4-like	protein-coding
chr4	101044500	101044779	114	NA	Intergenic	MLT2B4|LTR|ERVL	67016	NM_145244	115265	Hs.480378	XM_005262721	ENSG00000145358	DDIT4L	REDD2|Rtp801L	DNA-damage-inducible transcript 4-like	protein-coding
chr12	31256545	31256902	66	NA	intron (NM_001257144, intron 26 of 26)	intron (NM_001257144, intron 26 of 26)	-29942	NR_038927	100506660	Hs.586774	NR_038927	ENSG00000245614	DDX11-AS1	RP11-551L14.5	DDX11 antisense RNA 1	ncRNA
chr12	31256545	31256902	28	NA	intron (NM_001257144, intron 26 of 26)	intron (NM_001257144, intron 26 of 26)	-29942	NR_038927	100506660	Hs.586774	NR_038927	ENSG00000245614	DDX11-AS1	RP11-551L14.5	DDX11 antisense RNA 1	ncRNA
chr7	44601763	44602245	875	NA	Intergenic	Intergenic	12133	NM_019082	54606	Hs.654762	XM_005249787	ENSG00000136271	DDX56	DDX21|DDX26|NOH61	DEAD (Asp-Glu-Ala-Asp) box helicase 56	protein-coding
chr4	169242057	169242479	162	NA	Intergenic	Intergenic	-2310	NM_017631	55601	Hs.591710	NM_017631	ENSG00000137628	DDX60	-	DEAD (Asp-Glu-Ala-Asp) box polypeptide 60	protein-coding
chr4	169306035	169306263	51	NA	intron (NM_001012967, intron 29 of 37)	MER21B|LTR|ERVL	-66191	NM_017631	55601	Hs.591710	NM_017631	ENSG00000137628	DDX60	-	DEAD (Asp-Glu-Ala-Asp) box polypeptide 60	protein-coding
chr4	153028050	153028372	188	NA	Intergenic	Intergenic	-230596	NR_104273	102191832	Hs.712524	NR_104273	ENSG00000270751	DEAR	DEspR	dual endothelin-1(VEGFsp)/angiotensin II receptor pseudogene	pseudo
chr8	91013533	91013992	90	NA	exon (NM_001359, exon 1 of 10)	exon (NM_001359, exon 1 of 10)	182	NM_001359	1666	Hs.492212	XM_005250808	ENSG00000104325	DECR1	DECR|NADPH|SDR18C1	2,4-dienoyl CoA reductase 1, mitochondrial	protein-coding
chr8	91013533	91013992	43	NA	exon (NM_001359, exon 1 of 10)	exon (NM_001359, exon 1 of 10)	182	NM_001359	1666	Hs.492212	XM_005250808	ENSG00000104325	DECR1	DECR|NADPH|SDR18C1	2,4-dienoyl CoA reductase 1, mitochondrial	protein-coding
chr16	452336	452830	201	NA	intron (NM_020664, intron 1 of 8)	intron (NM_020664, intron 1 of 8)	725	NM_020664	26063	Hs.628831	XM_005255245	ENSG00000242612	DECR2	PDCR|SDR17C1	2,4-dienoyl CoA reductase 2, peroxisomal	protein-coding
chr8	6725811	6726130	52	NA	Intergenic	MER58A|DNA|hAT-Charlie	9559	NM_005218	1672	Hs.32949	NM_005218	ENSG00000164825	DEFB1	BD1|DEFB-1|DEFB101|HBD1	defensin, beta 1	protein-coding
chr4	9454066	9454312	138	NA	Intergenic	HERVE-int|LTR|ERV1	7929	NM_001040448	644414	Hs.590200	NM_001040448	ENSG00000186146	DEFB131	DEFB-31	defensin, beta 131	protein-coding
chr1	224400365	224400630	55	NA	Intergenic	Intergenic	29587	NM_003676	8560	Hs.299878	NM_144780	ENSG00000143753	DEGS1	DEGS|DEGS-1|DES1|Des-1|FADS7|MLD	delta(4)-desaturase, sphingolipid 1	protein-coding
chr14	100622109	100622571	558	NA	intron (NM_206918, intron 1 of 2)	intron (NM_206918, intron 1 of 2)	3672	NM_206918	123099	Hs.159643	NM_206918		DEGS2	C14orf66|DES2|FADS8	delta(4)-desaturase, sphingolipid 2	protein-coding
chr14	100611426	100611955	298	NA	Intergenic	Intergenic	14322	NM_206918	123099	Hs.159643	NM_206918		DEGS2	C14orf66|DES2|FADS8	delta(4)-desaturase, sphingolipid 2	protein-coding
chr14	100654978	100655284	92	NA	Intergenic	MSTC-int|LTR|ERVL-MaLR	-29119	NM_206918	123099	Hs.159643	NM_206918		DEGS2	C14orf66|DES2|FADS8	delta(4)-desaturase, sphingolipid 2	protein-coding
chr14	100608744	100609026	66	NA	intron (NM_016337, intron 13 of 13)	intron (NM_016337, intron 13 of 13)	17127	NM_206918	123099	Hs.159643	NM_206918		DEGS2	C14orf66|DES2|FADS8	delta(4)-desaturase, sphingolipid 2	protein-coding
chr14	100659293	100659557	55	NA	Intergenic	CpG	-33413	NM_206918	123099	Hs.159643	NM_206918		DEGS2	C14orf66|DES2|FADS8	delta(4)-desaturase, sphingolipid 2	protein-coding
chr9	126684299	126684970	821	NA	intron (NM_024820, intron 1 of 20)	Charlie7|DNA|hAT-Charlie	7783	NM_020946	57706	Hs.744995	XM_005252109	ENSG00000119522	DENND1A	FAM31A|KIAA1608|RP11-230L22.3	DENN/MADD domain containing 1A	protein-coding
chr8	142167071	142167583	586	NA	intron (NM_014957, intron 8 of 22)	MER58B|DNA|hAT-Charlie	28607	NM_014957	22898	Hs.18166	XM_005250838	ENSG00000105339	DENND3	-	DENN/MADD domain containing 3	protein-coding
chr9	19202170	19202571	250	NA	Intergenic	Intergenic	-28393	NR_073201	55667	Hs.249591	NM_017925	ENSG00000137145	DENND4C	C9orf55|C9orf55B|bA513M16.3	DENN/MADD domain containing 4C	protein-coding
chr9	19192005	19192326	38	NA	Intergenic	Intergenic	-38598	NR_073201	55667	Hs.249591	NM_017925	ENSG00000137145	DENND4C	C9orf55|C9orf55B|bA513M16.3	DENN/MADD domain containing 4C	protein-coding
chr12	31742745	31743362	362	NA	non-coding (NR_046909, exon 1 of 3)	non-coding (NR_046909, exon 1 of 3)	196	NR_046909	100874249	Hs.627628	NR_046909	ENSG00000255867	DENND5B-AS1	RP11-820K3.5	DENND5B antisense RNA 1	ncRNA
chr3	57692099	57692436	187	NA	Intergenic	MLT1K|LTR|ERVL-MaLR	-13451	NM_152678	201627	Hs.91085	XM_005264943	ENSG00000174839	DENND6A	AFI1A|FAM116A	DENN/MADD domain containing 6A	protein-coding
chr8	120907895	120908799	366	NA	intron (NM_001283012, intron 1 of 6)	intron (NM_001283012, intron 1 of 6)	22452	NM_022783	64798	Hs.112981	XM_005251022	ENSG00000155792	DEPTOR	DEP.6|DEPDC6	DEP domain containing MTOR-interacting protein	protein-coding
chr8	120927552	120927980	122	NA	intron (NM_001283012, intron 1 of 6)	intron (NM_001283012, intron 1 of 6)	41871	NM_022783	64798	Hs.112981	XM_005251022	ENSG00000155792	DEPTOR	DEP.6|DEPDC6	DEP domain containing MTOR-interacting protein	protein-coding
chr8	120907895	120908799	83	NA	intron (NM_001283012, intron 1 of 6)	intron (NM_001283012, intron 1 of 6)	22452	NM_022783	64798	Hs.112981	XM_005251022	ENSG00000155792	DEPTOR	DEP.6|DEPDC6	DEP domain containing MTOR-interacting protein	protein-coding
chr12	16174646	16175036	399	NA	intron (NM_015954, intron 6 of 8)	MSTB-int|LTR|ERVL-MaLR	110655	NM_015954	51071	Hs.39429	NM_015954	ENSG00000023697	DERA	DEOC	deoxyribose-phosphate aldolase (putative)	protein-coding
chr22	18946168	18946764	115	NA	Intergenic	Intergenic	-11545	NR_045121	26220	Hs.646438	NR_002733		DGCR5	LINC00037|NCRNA00037	DiGeorge syndrome critical region gene 5 (non-protein coding)	ncRNA
chr2	234332698	234332928	67	NA	intron (NM_003648, intron 2 of 28)	L3|LINE|CR1	36013	NM_003648	8527	Hs.471675	XM_005246107	ENSG00000077044	DGKD	DGKdelta|dgkd-2	diacylglycerol kinase, delta 130kDa	protein-coding
chr13	42645978	42646573	412	NA	intron (NM_178009, intron 1 of 29)	intron (NM_178009, intron 1 of 29)	23432	NM_178009	160851	Hs.733239	XM_005266270	ENSG00000102780	DGKH	DGKeta	diacylglycerol kinase, eta	protein-coding
chr13	42602598	42602832	172	NA	Intergenic	Intergenic	-11457	NM_001204504	160851	Hs.733239	XM_005266270	ENSG00000102780	DGKH	DGKeta	diacylglycerol kinase, eta	protein-coding
chr13	42600307	42600549	35	NA	Intergenic	Intergenic	-13744	NM_001204504	160851	Hs.733239	XM_005266270	ENSG00000102780	DGKH	DGKeta	diacylglycerol kinase, eta	protein-coding
chr7	137583861	137584078	66	NA	intron (NM_194071, intron 8 of 11)	intron (NM_194071, intron 8 of 11)	-52360	NM_004717	9162	Hs.242947	XM_005250688	ENSG00000157680	DGKI	DGK-IOTA	diacylglycerol kinase, iota	protein-coding
chr7	137576097	137576303	40	NA	intron (NM_194071, intron 8 of 11)	intron (NM_194071, intron 8 of 11)	-44591	NM_004717	9162	Hs.242947	XM_005250688	ENSG00000157680	DGKI	DGK-IOTA	diacylglycerol kinase, iota	protein-coding
chr13	52338204	52338691	648	NA	Intergenic	Intergenic	39851	NM_001031719	79758	Hs.266728	XM_005266526	ENSG00000102796	DHRS12	SDR40C1	dehydrogenase/reductase (SDR family) member 12	protein-coding
chr13	52376159	52376600	249	NA	intron (NM_001031719, intron 1 of 7)	intron (NM_001031719, intron 1 of 7)	1919	NM_001031719	79758	Hs.266728	XM_005266526	ENSG00000102796	DHRS12	SDR40C1	dehydrogenase/reductase (SDR family) member 12	protein-coding
chr17	27239093	27239531	112	NA	3' UTR (NM_020889, exon 9 of 9)	3' UTR (NM_020889, exon 9 of 9)	-9223	NM_144683	147015	Hs.631760	XM_005257933	ENSG00000167536	DHRS13	SDR7C5	dehydrogenase/reductase (SDR family) member 13	protein-coding
chr14	24078497	24079126	766	NA	Intergenic	THE1B|LTR|ERVL-MaLR	-26762	NM_182908	10202	Hs.272499	XM_005267249	ENSG00000100867	DHRS2	HEP27|SDR25C1	dehydrogenase/reductase (SDR family) member 2	protein-coding
chr14	24080732	24081011	46	NA	Intergenic	L2a|LINE|L2	-24702	NM_182908	10202	Hs.272499	XM_005267249	ENSG00000100867	DHRS2	HEP27|SDR25C1	dehydrogenase/reductase (SDR family) member 2	protein-coding
chr1	12675522	12676400	1259	NA	intron (NM_004753, intron 1 of 5)	intron (NM_004753, intron 1 of 5)	1859	NM_004753	9249	Hs.289347	XM_005263533	ENSG00000162496	DHRS3	DD83.1|RDH17|Rsdr1|SDR1|SDR16C1|retSDR1	dehydrogenase/reductase (SDR family) member 3	protein-coding
chr1	12678904	12679272	83	NA	Intergenic	Intergenic	-1268	NM_004753	9249	Hs.289347	XM_005263533	ENSG00000162496	DHRS3	DD83.1|RDH17|Rsdr1|SDR1|SDR16C1|retSDR1	dehydrogenase/reductase (SDR family) member 3	protein-coding
chr13	59928724	59929671	796	NA	Intergenic	THE1D|LTR|ERVL-MaLR	-657655	NR_046539	100874195	Hs.664101	XR_245372	ENSG00000227528	DIAPH3-AS1	RP11-442F12.2	DIAPH3 antisense RNA 1	ncRNA
chr13	60181888	60182418	648	NA	Intergenic	Intergenic	-404699	NR_046539	100874195	Hs.664101	XR_245372	ENSG00000227528	DIAPH3-AS1	RP11-442F12.2	DIAPH3 antisense RNA 1	ncRNA
chr20	61555274	61555741	220	NA	intron (NM_022105, intron 1 of 5)	intron (NM_022105, intron 1 of 5)	2396	NM_001193369	11083	Hs.517172	NM_001193369	ENSG00000101191	DIDO1	BYE1|C20orf158|DATF-1|DATF1|DIDO2|DIDO3|DIO-1|DIO1|dJ885L7.8	death inducer-obliterator 1	protein-coding
chr14	80935006	80935251	78	NA	Intergenic	HERVK22-int|LTR|ERVK	-237731	NM_000793	1734	Hs.732170	NM_000793	ENSG00000211448	DIO2	5DII|D2|DIOII|SelY|TXDI2	deiodinase, iodothyronine, type II	protein-coding
chr12	50942637	50943010	125	NA	intron (NM_173602, intron 1 of 37)	intron (NM_173602, intron 1 of 37)	44055	NM_173602	57609	Hs.505516	XM_005269044	ENSG00000066084	DIP2B	-	DIP2 disco-interacting protein 2 homolog B (Drosophila)	protein-coding
chr19	46693296	46693575	148	NA	Intergenic	MLT1H|LTR|ERVL-MaLR	-20064	NR_027003	93429	Hs.569940	NR_027003	ENSG00000268460	DKFZp434J0226	-	uncharacterized LOC93429	ncRNA
chr11	61523938	61524746	1458	NA	intron (NR_026882, intron 2 of 3)	intron (NR_026882, intron 2 of 3)	794	NR_026882	26070	Hs.564254	NR_026882	ENSG00000124915	DKFZP434K028	RP11-467L20.10	uncharacterized LOC26070	ncRNA
chr10	54136519	54136819	137	NA	Intergenic	Intergenic	62628	NM_012242	22943	Hs.40499	NM_012242	ENSG00000107984	DKK1	DKK-1|SK	dickkopf WNT signaling pathway inhibitor 1	protein-coding
chr4	107695172	107695805	681	NA	Intergenic	THE1C-int|LTR|ERVL-MaLR	261965	NM_014421	27123	Hs.211869	NM_014421	ENSG00000155011	DKK2	DKK-2	dickkopf WNT signaling pathway inhibitor 2	protein-coding
chr4	108104155	108104649	292	NA	Intergenic	Intergenic	-146949	NM_014421	27123	Hs.211869	NM_014421	ENSG00000155011	DKK2	DKK-2	dickkopf WNT signaling pathway inhibitor 2	protein-coding
chr11	12013983	12014476	274	NA	intron (NM_015881, intron 4 of 7)	intron (NM_015881, intron 4 of 7)	15957	NM_001018057	27122	Hs.731954	XM_005252866	ENSG00000050165	DKK3	REIC|RIG	dickkopf WNT signaling pathway inhibitor 3	protein-coding
chr8	13224191	13224468	129	NA	intron (NM_182643, intron 4 of 17)	intron (NM_182643, intron 4 of 17)	148100	NM_024767	10395	Hs.134296	XM_005273374	ENSG00000164741	DLC1	ARHGAP7|HP|STARD12|p122-RhoGAP	deleted in liver cancer 1	protein-coding
chr8	13187743	13188123	73	NA	intron (NM_182643, intron 4 of 17)	intron (NM_182643, intron 4 of 17)	184496	NM_024767	10395	Hs.134296	XM_005273374	ENSG00000164741	DLC1	ARHGAP7|HP|STARD12|p122-RhoGAP	deleted in liver cancer 1	protein-coding
chr8	13134103	13134465	65	NA	intron (NM_182643, intron 5 of 17)	CpG	-143475	NM_006094	10395	Hs.134296	XM_005273374	ENSG00000164741	DLC1	ARHGAP7|HP|STARD12|p122-RhoGAP	deleted in liver cancer 1	protein-coding
chr3	197098948	197099494	99	NA	Intergenic	MIR3|SINE|MIR	-73774	NM_001098424	1739	Hs.292549	XM_005269289	ENSG00000075711	DLG1	DLGH1|SAP-97|SAP97|dJ1061C18.1.1|hdlg	discs, large homolog 1 (Drosophila)	protein-coding
chrX	69653864	69654107	41	NA	TTS (NM_001171192)	TTS (NM_001171192)	-10720	NM_021120	1741	Hs.721586	XM_005262246	ENSG00000082458	DLG3	MRX|MRX90|NEDLG|SAP102|XLMR	discs, large homolog 3 (Drosophila)	protein-coding
chrX	69699267	69700178	369	NA	intron (NM_001166278, intron 2 of 11)	intron (NM_001166278, intron 2 of 11)	-23878	NR_109801	100873930	Hs.571699	XR_244507		DLG3-AS1	-	DLG3 antisense RNA 1	ncRNA
chrX	69697294	69697665	45	NA	intron (NM_001166278, intron 1 of 11)	intron (NM_001166278, intron 1 of 11)	-21635	NR_109801	100873930	Hs.571699	XR_244507		DLG3-AS1	-	DLG3 antisense RNA 1	ncRNA
chr17	7123792	7124079	92	NA	promoter-TSS (NM_001365)	promoter-TSS (NM_001365)	-566	NM_001365	1742	Hs.463928	XM_005256489	ENSG00000132535	DLG4	PSD95|SAP-90|SAP90	discs, large homolog 4 (Drosophila)	protein-coding
chr10	79669423	79669936	442	NA	intron (NM_004747, intron 1 of 31)	intron (NM_004747, intron 1 of 31)	16669	NM_004747	9231	Hs.652690	XM_005270276	ENSG00000151208	DLG5	LP-DLG|P-DLG5|PDLG	discs, large homolog 5 (Drosophila)	protein-coding
chr10	79661895	79662344	284	NA	intron (NM_004747, intron 1 of 31)	L1M5|LINE|L1	24229	NM_004747	9231	Hs.652690	XM_005270276	ENSG00000151208	DLG5	LP-DLG|P-DLG5|PDLG	discs, large homolog 5 (Drosophila)	protein-coding
chr18	4444190	4444831	1129	NA	intron (NM_001242761, intron 1 of 11)	intron (NM_001242761, intron 1 of 11)	10756	NM_001242761	9229	Hs.654793	XM_005258171	ENSG00000170579	DLGAP1	DAP-1|DAP-1-ALPHA|DAP-1-BETA|GKAP|SAPAP1|hGKAP	discs, large (Drosophila) homolog-associated protein 1	protein-coding
chr18	3773386	3773771	200	NA	intron (NM_001003809, intron 2 of 9)	intron (NM_001003809, intron 2 of 9)	71780	NM_001242766	9229	Hs.654793	XM_005258171	ENSG00000170579	DLGAP1	DAP-1|DAP-1-ALPHA|DAP-1-BETA|GKAP|SAPAP1|hGKAP	discs, large (Drosophila) homolog-associated protein 1	protein-coding
chr18	3721043	3721242	50	NA	intron (NM_001242766, intron 4 of 10)	intron (NM_001242766, intron 4 of 10)	124216	NM_001242766	9229	Hs.654793	XM_005258171	ENSG00000170579	DLGAP1	DAP-1|DAP-1-ALPHA|DAP-1-BETA|GKAP|SAPAP1|hGKAP	discs, large (Drosophila) homolog-associated protein 1	protein-coding
chr18	3711050	3711366	87	NA	intron (NM_001242766, intron 4 of 10)	intron (NM_001242766, intron 4 of 10)	117096	NR_024101	649446	Hs.19872	NM_001039796		DLGAP1-AS1	HsT914|RP11-874J12.2	DLGAP1 antisense RNA 1	ncRNA
chr18	3665812	3666094	71	NA	intron (NM_001242766, intron 4 of 10)	intron (NM_001242766, intron 4 of 10)	71841	NR_024101	649446	Hs.19872	NM_001039796		DLGAP1-AS1	HsT914|RP11-874J12.2	DLGAP1 antisense RNA 1	ncRNA
chr18	3618196	3618393	55	NA	intron (NM_001003809, intron 4 of 9)	intron (NM_001003809, intron 4 of 9)	24182	NR_024101	649446	Hs.19872	NM_001039796		DLGAP1-AS1	HsT914|RP11-874J12.2	DLGAP1 antisense RNA 1	ncRNA
chr18	3624147	3624433	44	NA	intron (NM_001003809, intron 4 of 9)	intron (NM_001003809, intron 4 of 9)	30178	NR_024101	649446	Hs.19872	NM_001039796		DLGAP1-AS1	HsT914|RP11-874J12.2	DLGAP1 antisense RNA 1	ncRNA
chr2	173117945	173118794	152	NA	Intergenic	Intergenic	-150891	NM_004405	1746	Hs.419	NM_004405	ENSG00000115844	DLX2	TES-1|TES1	distal-less homeobox 2	protein-coding
chr2	173117945	173118794	93	NA	Intergenic	Intergenic	-150891	NM_004405	1746	Hs.419	NM_004405	ENSG00000115844	DLX2	TES-1|TES1	distal-less homeobox 2	protein-coding
chr1	44683475	44683916	228	NA	intron (NM_001034024, intron 4 of 10)	intron (NM_001034024, intron 4 of 10)	4570	NM_019100	55929	Hs.8008	XM_005271035	ENSG00000178028	DMAP1	DNMAP1|DNMTAP1|EAF2|MEAF2|SWC4	DNA methyltransferase 1 associated protein 1	protein-coding
chrX	33397602	33398536	475	NA	Intergenic	Intergenic	-40343	NM_000109	1756	Hs.495912	NM_000109	ENSG00000198947	DMD	BMD|CMD3B|DXS142|DXS164|DXS206|DXS230|DXS239|DXS268|DXS269|DXS270|DXS272	dystrophin	protein-coding
chrX	32554409	32554850	95	NA	intron (NM_004006, intron 17 of 78)	L2c|LINE|L2	-124258	NM_004011	1756	Hs.495912	NM_000109	ENSG00000198947	DMD	BMD|CMD3B|DXS142|DXS164|DXS206|DXS230|DXS239|DXS268|DXS269|DXS270|DXS272	dystrophin	protein-coding
chr15	51915912	51916231	148	NA	Intergenic	Intergenic	-1104	NM_001174116	23312	Hs.511386	XM_005254255	ENSG00000104093	DMXL2	RC3	Dmx-like 2	protein-coding
chr14	50108513	50108912	255	NA	Intergenic	Intergenic	-6764	NM_001083908	55172	Hs.231761	NM_001083908	ENSG00000165506	DNAAF2	C14orf104|CILD10|KTU|PF13	dynein, axonemal, assembly factor 2	protein-coding
chr3	57436542	57436952	266	NA	intron (NM_178504, intron 25 of 58)	LTR16A1|LTR|ERVL	93324	NM_198564	201625	Hs.201378	NM_178504	ENSG00000174844	DNAH12	DHC3|DLP12|DNAH12L|DNAH7L|DNAHC12|DNAHC3|DNHD2|HDHC3|HL-19|HL19	dynein, axonemal, heavy chain 12	protein-coding
chr1	225072200	225072644	21	NA	Intergenic	LTR40A1|LTR|ERVL	-44934	NM_001145154	127602	Hs.133977	NM_001145154	ENSG00000185842	DNAH14	C1orf67|Dnahc14|HL-18|HL18	dynein, axonemal, heavy chain 14	protein-coding
chr17	76668593	76668933	228	NA	Intergenic	MSTC-int|LTR|ERVL-MaLR	-95287	NM_173628	8632	Hs.375975	NM_173628	ENSG00000187775	DNAH17	DNAHL1|DNEL2	dynein, axonemal, heavy chain 17	protein-coding
chr17	76588221	76588617	163	NA	Intergenic	Intergenic	-14943	NM_173628	8632	Hs.375975	NM_173628	ENSG00000187775	DNAH17	DNAHL1|DNEL2	dynein, axonemal, heavy chain 17	protein-coding
chr17	76662049	76662308	58	NA	Intergenic	LTR44|LTR|ERV1	-88702	NM_173628	8632	Hs.375975	NM_173628	ENSG00000187775	DNAH17	DNAHL1|DNEL2	dynein, axonemal, heavy chain 17	protein-coding
chr17	76522748	76522990	81	NA	intron (NM_173628, intron 23 of 80)	intron (NM_173628, intron 23 of 80)	41877	NR_102401	100996295	Hs.638630	NR_102401		DNAH17-AS1	RP11-559N14.5	DNAH17 antisense RNA 1	ncRNA
chr5	13354843	13355107	78	NA	Intergenic	Intergenic	589614	NM_001369	1767	Hs.212360	XM_005248262	ENSG00000039139	DNAH5	CILD3|DNAHC5|HL1|KTGNR|PCD	dynein, axonemal, heavy chain 5	protein-coding
chr5	14039106	14039535	75	NA	Intergenic	L2a|LINE|L2	-94731	NM_001369	1767	Hs.212360	XM_005248262	ENSG00000039139	DNAH5	CILD3|DNAHC5|HL1|KTGNR|PCD	dynein, axonemal, heavy chain 5	protein-coding
chr2	84921627	84921941	131	NA	intron (NM_001370, intron 46 of 76)	intron (NM_001370, intron 46 of 76)	178205	NM_001370	1768	Hs.249972	NM_173645	ENSG00000115423	DNAH6	DNHL1|Dnahc6|HL-2|HL2	dynein, axonemal, heavy chain 6	protein-coding
chr10	74079221	74079620	126	NA	Intergenic	CpG	35487	NM_001002762	54788	Hs.500013	XM_005269931	ENSG00000148719	DNAJB12	DJ10	DnaJ (Hsp40) homolog, subfamily B, member 12	protein-coding
chr12	49741414	49742183	2397	NA	intron (NM_024902, intron 1 of 2)	intron (NM_024902, intron 1 of 2)	757	NM_024902	79962	Hs.659300	XM_005269153	ENSG00000178401	DNAJC22	wus	DnaJ (Hsp40) homolog, subfamily C, member 22	protein-coding
chr9	114389879	114390326	437	NA	Intergenic	LTR41|LTR|ERVL	-3530	NR_037148	548645	Hs.534196	NM_001015882	ENSG00000059769	DNAJC25	bA16L21.2.1	DnaJ (Hsp40) homolog, subfamily C , member 25	protein-coding
chr13	96466786	96466988	75	NA	intron (NM_020121, intron 38 of 38)	MST-int|LTR|ERVL-MaLR	137494	NM_006260	5611	Hs.59214	NM_006260	ENSG00000102580	DNAJC3	ERdj6|HP58|P58|P58IPK|PRKRI	DnaJ (Hsp40) homolog, subfamily C, member 3	protein-coding
chr17	40154811	40155226	497	NA	intron (NM_003315, intron 1 of 13)	intron (NM_003315, intron 1 of 13)	14165	NM_001144766	7266	Hs.500156	NM_001144766	ENSG00000168259	DNAJC7	DJ11|DJC7|TPR2|TTC2	DnaJ (Hsp40) homolog, subfamily C, member 7	protein-coding
chr3	58161145	58161628	1125	NA	Intergenic	Intergenic	35344	NM_004944	1776	Hs.476453	XM_005264913	ENSG00000163687	DNASE1L3	DHP2|DNAS1L3|LSD|SLEB16	deoxyribonuclease I-like 3	protein-coding
chr10	101687429	101687743	81	NA	intron (NR_024130, intron 1 of 4)	intron (NR_024130, intron 1 of 4)	620	NR_024130	100188954	Hs.656104	NR_024130		DNMBP-AS1	NCRNA00093|bA287G8.2	DNMBP antisense RNA 1	ncRNA
chr20	44420467	44420774	137	NA	promoter-TSS (NM_052951)	promoter-TSS (NM_052951)	44	NM_052951	116092	Hs.472852	NM_052951	ENSG00000101457	DNTTIP1	C20orf167|Tdif1|dJ447F3.4	deoxynucleotidyltransferase, terminal, interacting protein 1	protein-coding
chr3	51023444	51023794	91	NA	intron (NM_004947, intron 5 of 52)	L2c|LINE|L2	310947	NM_004947	1795	Hs.476284	XM_005264914	ENSG00000088538	DOCK3	MOCA|PBP	dedicator of cytokinesis 3	protein-coding
chr8	25044997	25045564	1274	NA	intron (NM_024940, intron 1 of 51)	intron (NM_024940, intron 1 of 51)	2993	NM_024940	80005	Hs.195403	XM_005273650	ENSG00000147459	DOCK5	-	dedicator of cytokinesis 5	protein-coding
chr19	11376398	11376854	1137	NA	Intergenic	Intergenic	-3458	NM_020812	57572	Hs.591002	XM_005260000	ENSG00000130158	DOCK6	AOS2|ZIR1	dedicator of cytokinesis 6	protein-coding
chr13	99698595	99698891	72	NA	intron (NM_015296, intron 1 of 55)	intron (NM_015296, intron 1 of 55)	39917	NM_001130049	23348	Hs.596105	XM_005254034	ENSG00000088387	DOCK9	ZIZ1|ZIZIMIN1	dedicator of cytokinesis 9	protein-coding
chr13	99474311	99474508	63	NA	intron (NM_015296, intron 46 of 55)	intron (NM_015296, intron 46 of 55)	-9929	NR_046663	100874096		NR_046663		DOCK9-AS1	-	DOCK9 antisense RNA 1	ncRNA
chr16	57514097	57514586	385	NA	intron (NM_018110, intron 1 of 8)	intron (NM_018110, intron 1 of 8)	6044	NM_018110	55715	Hs.279832	XM_005256042	ENSG00000125170	DOK4	-	docking protein 4	protein-coding
chr9	131840937	131841211	183	NA	Intergenic	Intergenic	-2309	NM_001135917	57171	Hs.21701	NM_001135917	ENSG00000167130	DOLPP1	LSFR2	dolichyldiphosphatase 1	protein-coding
chr21	37560426	37560651	45	NA	intron (NM_005128, intron 2 of 36)	intron (NM_005128, intron 2 of 36)	23699	NM_005128	9980	Hs.204575	XM_005261085	ENSG00000142197	DOPEY2	21orf5|C21orf5	dopey family member 2	protein-coding
chr19	2168955	2169303	58	NA	intron (NM_032482, intron 1 of 27)	intron (NM_032482, intron 1 of 27)	4981	NM_032482	84444	Hs.713641	XM_005259659	ENSG00000104885	DOT1L	DOT1|KMT4	DOT1-like histone H3K79 methyltransferase	protein-coding
chr3	16293738	16293979	50	NA	Intergenic	Intergenic	12638	NM_001047434	285381	Hs.388087	NM_001047434		DPH3	DELGIP|DELGIP1|DESR1|DPH3A|KTI11|ZCSL2	diphthamide biosynthesis 3	protein-coding
chr2	115307977	115308341	115	NA	intron (NM_001178036, intron 2 of 26)	intron (NM_001178036, intron 2 of 26)	88979	NM_001178036	57628	Hs.580539	XM_005263718	ENSG00000175497	DPP10	DPL2|DPPY|DPRP3	dipeptidyl-peptidase 10 (non-functional)	protein-coding
chr2	115284516	115284767	108	NA	intron (NM_001178036, intron 2 of 26)	intron (NM_001178036, intron 2 of 26)	65461	NM_001178036	57628	Hs.580539	XM_005263718	ENSG00000175497	DPP10	DPL2|DPPY|DPRP3	dipeptidyl-peptidase 10 (non-functional)	protein-coding
chr2	162761952	162762427	206	NA	exon (NM_022058, exon 14 of 26)	exon (NM_022058, exon 14 of 26)	168863	NM_001935	1803	Hs.368912	XM_005246371	ENSG00000197635	DPP4	ADABP|ADCP2|CD26|DPPIV|TP103	dipeptidyl-peptidase 4	protein-coding
chr2	162884192	162884559	95	NA	intron (NM_001935, intron 10 of 25)	intron (NM_001935, intron 10 of 25)	46677	NM_001935	1803	Hs.368912	XM_005246371	ENSG00000197635	DPP4	ADABP|ADCP2|CD26|DPPIV|TP103	dipeptidyl-peptidase 4	protein-coding
chr19	4723709	4724107	50	NA	promoter-TSS (NM_139159)	promoter-TSS (NM_139159)	-53	NM_139159	91039	Hs.515081	XM_005259673	ENSG00000142002	DPP9	DP9|DPLP9|DPRP-2|DPRP2	dipeptidyl-peptidase 9	protein-coding
chr3	193590033	193590521	1088	NA	Intergenic	MamRep605|Unknown|Unknown	121750	NR_027764	100128023	Hs.730112	NR_027764		DPPA2P3	-	developmental pluripotency associated 2 pseudogene 3	pseudo
chr3	193603646	193604025	93	NA	Intergenic	MER50|LTR|ERV1	108192	NR_027764	100128023	Hs.730112	NR_027764		DPPA2P3	-	developmental pluripotency associated 2 pseudogene 3	pseudo
chr3	193587638	193588021	86	NA	Intergenic	CpG	124198	NR_027764	100128023	Hs.730112	NR_027764		DPPA2P3	-	developmental pluripotency associated 2 pseudogene 3	pseudo
chr3	193561810	193562066	70	NA	Intergenic	Intergenic	150089	NR_027764	100128023	Hs.730112	NR_027764		DPPA2P3	-	developmental pluripotency associated 2 pseudogene 3	pseudo
chr3	193688824	193689036	55	NA	intron (NR_033944, intron 1 of 2)	intron (NR_033944, intron 1 of 2)	23097	NR_027764	100128023	Hs.730112	NR_027764		DPPA2P3	-	developmental pluripotency associated 2 pseudogene 3	pseudo
chr7	32709575	32710191	662	NA	intron (NR_036680, intron 5 of 16)	L4|LINE|RTE	48897	NR_036680	100129460	Hs.633705	NR_036680		DPY19L1P1	-	DPY19L1 pseudogene 1	pseudo
chr7	32720225	32720493	138	NA	intron (NR_036680, intron 2 of 16)	intron (NR_036680, intron 2 of 16)	38421	NR_036680	100129460	Hs.633705	NR_036680		DPY19L1P1	-	DPY19L1 pseudogene 1	pseudo
chr7	32708942	32709212	78	NA	intron (NR_036680, intron 5 of 16)	MER76|LTR|ERVL	49703	NR_036680	100129460	Hs.633705	NR_036680		DPY19L1P1	-	DPY19L1 pseudogene 1	pseudo
chr8	26439078	26439499	439	NA	intron (NM_001244604, intron 1 of 13)	intron (NM_001244604, intron 1 of 13)	3367	NM_001244604	1808	Hs.593187	NM_001197293	ENSG00000092964	DPYSL2	CRMP-2|CRMP2|DHPRP2|DRP-2|DRP2|N2A3|ULIP-2|ULIP2	dihydropyrimidinase-like 2	protein-coding
chr8	26515808	26516375	405	NA	TTS (NM_001244604)	TTS (NM_001244604)	80170	NM_001244604	1808	Hs.593187	NM_001197293	ENSG00000092964	DPYSL2	CRMP-2|CRMP2|DHPRP2|DRP-2|DRP2|N2A3|ULIP-2|ULIP2	dihydropyrimidinase-like 2	protein-coding
chr8	26428743	26429212	365	NA	intron (NM_001197293, intron 1 of 13)	intron (NM_001197293, intron 1 of 13)	-6363	NM_001386	1808	Hs.593187	NM_001197293	ENSG00000092964	DPYSL2	CRMP-2|CRMP2|DHPRP2|DRP-2|DRP2|N2A3|ULIP-2|ULIP2	dihydropyrimidinase-like 2	protein-coding
chr8	26499210	26499731	205	NA	intron (NM_001386, intron 8 of 13)	intron (NM_001386, intron 8 of 13)	63549	NM_001244604	1808	Hs.593187	NM_001197293	ENSG00000092964	DPYSL2	CRMP-2|CRMP2|DHPRP2|DRP-2|DRP2|N2A3|ULIP-2|ULIP2	dihydropyrimidinase-like 2	protein-coding
chr8	26410051	26410481	81	NA	intron (NM_001197293, intron 1 of 13)	MSTC|LTR|ERVL-MaLR	-25074	NM_001386	1808	Hs.593187	NM_001197293	ENSG00000092964	DPYSL2	CRMP-2|CRMP2|DHPRP2|DRP-2|DRP2|N2A3|ULIP-2|ULIP2	dihydropyrimidinase-like 2	protein-coding
chr8	26465884	26466202	78	NA	intron (NM_001386, intron 3 of 13)	intron (NM_001386, intron 3 of 13)	30122	NM_001244604	1808	Hs.593187	NM_001197293	ENSG00000092964	DPYSL2	CRMP-2|CRMP2|DHPRP2|DRP-2|DRP2|N2A3|ULIP-2|ULIP2	dihydropyrimidinase-like 2	protein-coding
chr5	174712233	174712689	49	NA	Intergenic	Intergenic	158702	NM_000794	1812	Hs.2624	NM_000794	ENSG00000184845	DRD1	DADR|DRD1A	dopamine receptor D1	protein-coding
chr10	50627061	50627383	35	NA	Intergenic	MIRc|SINE|MIR	-23160	NM_001276451	644168	Hs.534530	NM_001080520		DRGX	DRG11|PRRXL1	dorsal root ganglia homeobox	protein-coding
chr18	28591406	28591759	77	NA	intron (NM_024423, intron 9 of 16)	intron (NM_024423, intron 9 of 16)	31199	NM_001941	1825	Hs.41690	NM_001941	ENSG00000134762	DSC3	CDHF3|DSC|DSC1|DSC2|DSC4|HT-CP	desmocollin 3	protein-coding
chr21	42348159	42348804	237	NA	Intergenic	Intergenic	-129442	NR_073202	1826	Hs.397800	NM_001271534	ENSG00000171587	DSCAM	CHD2-42|CHD2-52	Down syndrome cell adhesion molecule	protein-coding
chr21	41879796	41880283	106	NA	intron (NR_073202, intron 3 of 32)	intron (NR_073202, intron 3 of 32)	122654	NR_046774	100874326	Hs.679746	NR_046774		DSCAM-IT1	AF165176.2|zag4	DSCAM intronic transcript 1 (non-protein coding)	ncRNA
chr21	41884051	41884377	69	NA	intron (NR_073202, intron 3 of 32)	L2b|LINE|L2	118479	NR_046774	100874326	Hs.679746	NR_046774		DSCAM-IT1	AF165176.2|zag4	DSCAM intronic transcript 1 (non-protein coding)	ncRNA
chr18	28882929	28883322	332	NA	Intergenic	Intergenic	-14927	NM_001942	1828	Hs.2633	NM_001942	ENSG00000134760	DSG1	CDHF4|DG1|DSG|EPKHE|EPKHIA|PPKS1|SPPK1	desmoglein 1	protein-coding
chr18	29070425	29070946	199	NA	Intergenic	L2c|LINE|L2	-7342	NM_001943	1829	Hs.412597	NM_001943	ENSG00000046604	DSG2	ARVC10|ARVD10|CDHF5|CMD1BB|HDGC	desmoglein 2	protein-coding
chr18	29092255	29092740	138	NA	intron (NM_001943, intron 1 of 14)	L2a|LINE|L2	14470	NM_001943	1829	Hs.412597	NM_001943	ENSG00000046604	DSG2	ARVC10|ARVD10|CDHF5|CMD1BB|HDGC	desmoglein 2	protein-coding
chr18	28977312	28977571	82	NA	intron (NM_001134453, intron 8 of 14)	intron (NM_001134453, intron 8 of 14)	20701	NM_001134453	147409	Hs.407618	NM_001134453	ENSG00000175065	DSG4	CDGF13|CDHF13|LAH	desmoglein 4	protein-coding
chr18	28979741	28979951	64	NA	intron (NM_001134453, intron 9 of 14)	intron (NM_001134453, intron 9 of 14)	23106	NM_001134453	147409	Hs.407618	NM_001134453	ENSG00000175065	DSG4	CDGF13|CDHF13|LAH	desmoglein 4	protein-coding
chr6	7561625	7562105	480	NA	intron (NM_001008844, intron 4 of 23)	intron (NM_001008844, intron 4 of 23)	19995	NM_004415	1832	Hs.519873	XM_005248864	ENSG00000096696	DSP	DP|DPI|DPII	desmoplakin	protein-coding
chr6	7548686	7549509	367	NA	intron (NM_001008844, intron 1 of 23)	intron (NM_001008844, intron 1 of 23)	7227	NM_004415	1832	Hs.519873	XM_005248864	ENSG00000096696	DSP	DP|DPI|DPII	desmoplakin	protein-coding
chr6	56347411	56347724	198	NA	exon (NM_001144769, exon 83 of 97)	exon (NM_001144769, exon 83 of 97)	160127	NM_015548	667	Hs.735651	XM_005249310	ENSG00000151914	DST	BP240|BPA|BPAG1|CATX-15|CATX15|D6S1101|DMH|DT|EBSB2|HSAN6|MACF2	dystonin	protein-coding
chr6	56740837	56741117	148	NA	intron (NM_001144769, intron 3 of 96)	L2a|LINE|L2	-24263	NM_001144770	667	Hs.735651	XM_005249310	ENSG00000151914	DST	BP240|BPA|BPAG1|CATX-15|CATX15|D6S1101|DMH|DT|EBSB2|HSAN6|MACF2	dystonin	protein-coding
chr6	56725417	56725732	76	NA	intron (NM_001144769, intron 3 of 96)	intron (NM_001144769, intron 3 of 96)	-8860	NM_001144770	667	Hs.735651	XM_005249310	ENSG00000151914	DST	BP240|BPA|BPAG1|CATX-15|CATX15|D6S1101|DMH|DT|EBSB2|HSAN6|MACF2	dystonin	protein-coding
chr4	36401384	36402017	116	NA	Intergenic	Intergenic	116056	NM_001170700	401124	Hs.363407	NM_001136536		DTHD1	-	death domain containing 1	protein-coding
chr2	25980807	25981266	616	NA	intron (NM_018263, intron 8 of 11)	intron (NM_018263, intron 8 of 11)	-84520	NM_033148	1838	Hs.307720	XM_005264181	ENSG00000138101	DTNB	-	dystrobrevin, beta	protein-coding
chr2	25838256	25838570	168	NA	intron (NM_001256303, intron 4 of 19)	MER21C|LTR|ERVL	34678	NM_001256308	1838	Hs.307720	XM_005264181	ENSG00000138101	DTNB	-	dystrobrevin, beta	protein-coding
chr15	50136594	50136891	174	NA	Intergenic	LTR22A|LTR|ERVK	223516	NM_020234	56986	Hs.127432	XM_005254560	ENSG00000104047	DTWD1	-	DTW domain containing 1	protein-coding
chr11	58941754	58942482	255	NA	intron (NM_015177, intron 1 of 8)	intron (NM_015177, intron 1 of 8)	2306	NM_015177	23220	Hs.523696	NM_015177	ENSG00000110042	DTX4	RNF155	deltex homolog 4 (Drosophila)	protein-coding
chr11	58953655	58953950	137	NA	intron (NM_015177, intron 2 of 8)	intron (NM_015177, intron 2 of 8)	13990	NM_015177	23220	Hs.523696	NM_015177	ENSG00000110042	DTX4	RNF155	deltex homolog 4 (Drosophila)	protein-coding
chr11	58941754	58942482	50	NA	intron (NM_015177, intron 1 of 8)	intron (NM_015177, intron 1 of 8)	2306	NM_015177	23220	Hs.523696	NM_015177	ENSG00000110042	DTX4	RNF155	deltex homolog 4 (Drosophila)	protein-coding
chr1	222299328	222299769	172	NA	Intergenic	MLT1D|LTR|ERVL-MaLR	-384032	NM_144729	11221	Hs.732301	XM_005273025	ENSG00000143507	DUSP10	MKP-5|MKP5	dual specificity phosphatase 10	protein-coding
chr1	222138616	222139002	121	NA	Intergenic	MER4D1|LTR|ERV1	-223293	NM_144729	11221	Hs.732301	XM_005273025	ENSG00000143507	DUSP10	MKP-5|MKP5	dual specificity phosphatase 10	protein-coding
chr22	31063130	31063681	41	NA	intron (NM_152511, intron 1 of 1)	intron (NM_152511, intron 1 of 1)	467	NM_152511	150290	Hs.517544	XM_005261365	ENSG00000167065	DUSP18	DSP18|DUSP20|LMWDSP20|bK963H5.1	dual specificity phosphatase 18	protein-coding
chr8	33598786	33599253	137	NA	Intergenic	MSTA|LTR|ERVL-MaLR	-141580	NM_024025	78986	Hs.8719	XM_005273633	ENSG00000133878	DUSP26	DUSP24|LDP-4|MKP8|NATA1|SKRP3	dual specificity phosphatase 26 (putative)	protein-coding
chr8	34206628	34206834	58	NA	Intergenic	L1MC3|LINE|L1	-749292	NM_024025	78986	Hs.8719	XM_005273633	ENSG00000133878	DUSP26	DUSP24|LDP-4|MKP8|NATA1|SKRP3	dual specificity phosphatase 26 (putative)	protein-coding
chr8	29385482	29385860	106	NA	Intergenic	MIRb|SINE|MIR	-177404	NM_001394	1846	Hs.417962	NM_001394	ENSG00000120875	DUSP4	HVH2|MKP-2|MKP2|TYP	dual specificity phosphatase 4	protein-coding
chr8	29355798	29356068	66	NA	Intergenic	AluJb|SINE|Alu	-147666	NM_001394	1846	Hs.417962	NM_001394	ENSG00000120875	DUSP4	HVH2|MKP-2|MKP2|TYP	dual specificity phosphatase 4	protein-coding
chr12	89769262	89769802	319	NA	Intergenic	Intergenic	-23236	NM_022652	1848	Hs.718640	NM_001946	ENSG00000139318	DUSP6	HH19|MKP3|PYST1	dual specificity phosphatase 6	protein-coding
chr12	89773289	89773507	57	NA	Intergenic	Intergenic	-27102	NM_022652	1848	Hs.718640	NM_001946	ENSG00000139318	DUSP6	HH19|MKP3|PYST1	dual specificity phosphatase 6	protein-coding
chr12	89779944	89780190	42	NA	Intergenic	MIRb|SINE|MIR	-33771	NM_022652	1848	Hs.718640	NM_001946	ENSG00000139318	DUSP6	HH19|MKP3|PYST1	dual specificity phosphatase 6	protein-coding
chr16	66774466	66774919	267	NA	intron (NM_001286157, intron 3 of 11)	MLT1J|LTR|ERVL-MaLR	10833	NM_006141	1783	Hs.369068	XM_005255831	ENSG00000135720	DYNC1LI2	DNCLI2|LIC2	dynein, cytoplasmic 1, light intermediate chain 2	protein-coding
chr16	80299561	80299957	383	NA	Intergenic	Intergenic	-275095	NM_130897	83657	Hs.98849	XM_005256188	ENSG00000168589	DYNLRB2	DNCL2B|DNLC2B|ROBLD2	dynein, light chain, roadblock-type 2	protein-coding
chr21	38821534	38821833	92	NA	intron (NM_101395, intron 3 of 12)	MLT1J1|LTR|ERVL-MaLR	29081	NM_001396	1859	Hs.368240	XM_005260931	ENSG00000157540	DYRK1A	DYRK|DYRK1|HP86|MNB|MNBH|MRD7	dual-specificity tyrosine-(Y)-phosphorylation regulated kinase 1A	protein-coding
chr12	68041220	68041910	138	NA	promoter-TSS (NM_006482)	promoter-TSS (NM_006482)	-947	NM_006482	8445	Hs.173135	NM_003583		DYRK2	-	dual-specificity tyrosine-(Y)-phosphorylation regulated kinase 2	protein-coding
chr2	71622648	71622925	70	NA	intron (NM_001014972, intron 10 of 27)	LTR22A|LTR|ERVK	-57967	NM_001130981	8291	Hs.252180	XM_005264584	ENSG00000135636	DYSF	FER1L1|LGMD2B|MMD1	dysferlin	protein-coding
chr15	55771858	55772588	1327	NA	intron (NR_037923, intron 3 of 15)	MER11A|LTR|ERVK	18559	NR_037923	100533483	Hs.285051	NR_037923		DYX1C1-CCPG1	-	DYX1C1-CCPG1 readthrough (NMD candidate)	ncRNA
chr12	77607230	77607623	217	NA	Intergenic	Intergenic	-148066	NM_203394	144455	Hs.416375	NM_203394	ENSG00000165891	E2F7	-	E2F transcription factor 7	protein-coding
chr14	34974953	34975199	24	NA	Intergenic	Intergenic	33867	NM_018453	55837	Hs.433269	XM_005267858	ENSG00000129518	EAPP	BM036|C14orf11	E2F-associated phosphoprotein	protein-coding
chr8	25642729	25643188	734	NA	Intergenic	Intergenic	259682	NM_022659	64641	Hs.491292	NM_022659	ENSG00000221818	EBF2	COE2|EBF-2|O/E-3|OE-3	early B-cell factor 2	protein-coding
chr1	21672214	21672531	114	NA	promoter-TSS (NM_001113348)	promoter-TSS (NM_001113348)	-338	NM_001113348	1889	Hs.195080	XM_005245750	ENSG00000117298	ECE1	ECE	endothelin converting enzyme 1	protein-coding
chr10	11731880	11732432	335	NA	Intergenic	Intergenic	-52200	NM_024693	79746	Hs.22242	NM_024693	ENSG00000134463	ECHDC3	-	enoyl CoA hydratase domain containing 3	protein-coding
chr10	11757902	11758313	105	NA	Intergenic	Intergenic	-26249	NM_024693	79746	Hs.22242	NM_024693	ENSG00000134463	ECHDC3	-	enoyl CoA hydratase domain containing 3	protein-coding
chrX	68831663	68831982	103	NA	Intergenic	MIRb|SINE|MIR	-4089	NM_001005610	1896	Hs.105407	NM_001005609	ENSG00000158813	EDA	ECTD1|ED1|ED1-A1|ED1-A2|EDA-A1|EDA-A2|EDA1|EDA2|HED|HED1|ODT1|STHAGX1|XHED|XLHED	ectodysplasin A	protein-coding
chr15	74956349	74956859	75	NA	intron (NM_025083, intron 3 of 6)	intron (NM_025083, intron 3 of 6)	31782	NM_001142443	80153	Hs.682454	XM_005254693	ENSG00000179151	EDC3	LSM16|YJDC|YJEFN2	enhancer of mRNA decapping 3	protein-coding
chr1	184559462	184559974	1776	NA	intron (NM_030806, intron 3 of 5)	intron (NM_030806, intron 3 of 5)	164323	NM_025191	80267	Hs.523811	XM_005245498	ENSG00000116406	EDEM3	C1orf22	ER degradation enhancer, mannosidase alpha-like 3	protein-coding
chr1	184761431	184762033	781	NA	3' UTR (NM_052966, exon 14 of 14)	3' UTR (NM_052966, exon 14 of 14)	-37691	NM_025191	80267	Hs.523811	XM_005245498	ENSG00000116406	EDEM3	C1orf22	ER degradation enhancer, mannosidase alpha-like 3	protein-coding
chr9	139753689	139754669	851	NA	intron (NM_206920, intron 25 of 26)	intron (NM_206920, intron 25 of 26)	6609	NM_153200	8721	Hs.174050	NM_001281297	ENSG00000107223	EDF1	EDF-1|MBF1	endothelial differentiation-related factor 1	protein-coding
chr9	139753689	139754669	48	NA	intron (NM_206920, intron 25 of 26)	intron (NM_206920, intron 25 of 26)	6609	NM_153200	8721	Hs.174050	NM_001281297	ENSG00000107223	EDF1	EDF-1|MBF1	endothelial differentiation-related factor 1	protein-coding
chr6	12296482	12296873	304	NA	3' UTR (NM_001168319, exon 5 of 5)	3' UTR (NM_001168319, exon 5 of 5)	6148	NM_001955	1906	Hs.713645	NM_001168319	ENSG00000078401	EDN1	ET1|HDLCQ7|PPET1	endothelin 1	protein-coding
chr1	41980052	41980370	141	NA	intron (NM_024503, intron 7 of 8)	intron (NM_024503, intron 7 of 8)	-29867	NM_001956	1907	Hs.1407	XM_005270565	ENSG00000127129	EDN2	ET2|PPET2	endothelin 2	protein-coding
chr20	57883904	57884208	201	NA	intron (NM_207034, intron 2 of 4)	intron (NM_207034, intron 2 of 4)	8557	NM_207032	1908	Hs.1408	XM_005260312	ENSG00000124205	EDN3	ET-3|ET3|HSCR4|PPET3|WS4B	endothelin 3	protein-coding
chr20	57875002	57875310	126	NA	promoter-TSS (NM_207033)	promoter-TSS (NM_207033)	-343	NM_207034	1908	Hs.1408	XM_005260312	ENSG00000124205	EDN3	ET-3|ET3|HSCR4|PPET3|WS4B	endothelin 3	protein-coding
chr12	93483932	93484662	450	NA	intron (NR_040096, intron 3 of 4)	MIRc|SINE|MIR	-161190	NM_003566	8411	Hs.567367	NM_003566	ENSG00000102189	EEA1	MST105|MSTP105|ZFYVE2	early endosome antigen 1	protein-coding
chr12	93481129	93481609	401	NA	intron (NR_040096, intron 3 of 4)	intron (NR_040096, intron 3 of 4)	-158262	NM_003566	8411	Hs.567367	NM_003566	ENSG00000102189	EEA1	MST105|MSTP105|ZFYVE2	early endosome antigen 1	protein-coding
chr12	93412475	93412719	137	NA	intron (NR_040096, intron 3 of 4)	intron (NR_040096, intron 3 of 4)	-89490	NM_003566	8411	Hs.567367	NM_003566	ENSG00000102189	EEA1	MST105|MSTP105|ZFYVE2	early endosome antigen 1	protein-coding
chr12	93239085	93239441	49	NA	intron (NM_003566, intron 9 of 28)	L2a|LINE|L2	83844	NM_003566	8411	Hs.567367	NM_003566	ENSG00000102189	EEA1	MST105|MSTP105|ZFYVE2	early endosome antigen 1	protein-coding
chr11	85923179	85923533	83	NA	Intergenic	Intergenic	-32450	NM_152991	8726	Hs.503510	XM_005274372	ENSG00000074266	EED	HEED|WAIT1	embryonic ectoderm development	protein-coding
chr6	74276717	74277273	651	NA	Intergenic	Intergenic	-46240	NM_001402	1915	Hs.745122	XM_005248666	ENSG00000156508	EEF1A1	CCS-3|CCS3|EE1A1|EEF-1|EEF1A|EF-Tu|EF1A|GRAF-1EF|HNGC:16303|LENG7|PTI1|eEF1A-1	eukaryotic translation elongation factor 1 alpha 1	protein-coding
chr2	207024187	207024620	127	NA	promoter-TSS (NM_001959)	promoter-TSS (NM_001959)	85	NM_001959	1933	Hs.421608	NM_001037663	ENSG00000114942	EEF1B2	EEF1B|EEF1B1|EF1B	eukaryotic translation elongation factor 1 beta 2	protein-coding
chr16	22243923	22244503	241	NA	intron (NM_013302, intron 2 of 17)	intron (NM_013302, intron 2 of 17)	26621	NM_013302	29904	Hs.498892	NM_013302		EEF2K	HSU93850|eEF-2K	eukaryotic elongation factor-2 kinase	protein-coding
chr3	127970862	127971195	138	NA	intron (NM_021937, intron 2 of 6)	intron (NM_021937, intron 2 of 6)	98715	NM_021937	60678	Hs.477498	XM_005247695	ENSG00000132394	EEFSEC	EFSEC|SELB	eukaryotic elongation factor, selenocysteine-tRNA-specific	protein-coding
chr3	129152358	129152788	176	NA	intron (NM_001276273, intron 4 of 6)	MIRc|SINE|MIR	-5079	NM_207307	90288	Hs.652347	XM_005247890	ENSG00000172771	EFCAB12	C3orf25	EF-hand calcium binding domain 12	protein-coding
chr17	45393699	45394042	227	NA	Intergenic	Intergenic	-7457	NM_152347	124989	Hs.463303	XM_005257047	ENSG00000178852	EFCAB13	C17orf57	EF-hand calcium binding domain 13	protein-coding
chr1	245127727	245127934	131	NA	Intergenic	Intergenic	-5341	NM_032328	84288	Hs.134857	XM_005273312	ENSG00000203666	EFCAB2	-	EF-hand calcium binding domain 2	protein-coding
chr11	825392	825646	95	NA	TTS (NM_020376)	TTS (NM_020376)	-2741	NM_173584	283229	Hs.660936	XM_005252871	ENSG00000177685	EFCAB4A	CRACR2B	EF-hand calcium binding domain 4A	protein-coding
chr3	19776340	19777028	744	NA	Intergenic	Intergenic	199022	NM_144715	151651	Hs.733920	XM_005264889	ENSG00000163576	EFHB	-	EF-hand domain family, member B	protein-coding
chrX	44288634	44288957	182	NA	Intergenic	L2a|LINE|L2	-85872	NM_025184	80258	Hs.521953	XM_005272671		EFHC2	dJ1158H2.1	EF-hand domain (C-terminal) containing 2	protein-coding
chr1	15677110	15677409	103	NA	intron (NM_052929, intron 18 of 30)	intron (NM_052929, intron 18 of 30)	-59132	NM_024329	79180	Hs.465374	XM_005246000	ENSG00000142634	EFHD2	SWS1	EF-hand domain family, member D2	protein-coding
chr1	155101474	155102076	1157	NA	intron (NM_004428, intron 1 of 4)	intron (NM_004428, intron 1 of 4)	1426	NM_182685	1942	Hs.516664	XM_005244940	ENSG00000169242	EFNA1	B61|ECKLG|EFL1|EPLG1|LERK-1|LERK1|TNFAIP4	ephrin-A1	protein-coding
chr1	155098340	155098675	224	NA	Intergenic	CpG	-1842	NM_004428	1942	Hs.516664	XM_005244940	ENSG00000169242	EFNA1	B61|ECKLG|EFL1|EPLG1|LERK-1|LERK1|TNFAIP4	ephrin-A1	protein-coding
chr19	1284347	1284744	297	NA	Intergenic	Intergenic	-1608	NM_001405	1943	Hs.741510	NM_001405	ENSG00000099617	EFNA2	ELF-1|EPLG6|HEK7-L|LERK-6|LERK6	ephrin-A2	protein-coding
chrX	68088833	68089683	677	NA	Intergenic	L2a|LINE|L2	40418	NM_004429	1947	Hs.144700	NM_004429	ENSG00000090776	EFNB1	CFND|CFNS|EFL3|EPLG2|Elk-L|LERK2	ephrin-B1	protein-coding
chrX	68115117	68115532	228	NA	Intergenic	MIR3|SINE|MIR	66484	NM_004429	1947	Hs.144700	NM_004429	ENSG00000090776	EFNB1	CFND|CFNS|EFL3|EPLG2|Elk-L|LERK2	ephrin-B1	protein-coding
chrX	68061277	68061804	194	NA	3' UTR (NM_004429, exon 5 of 5)	3' UTR (NM_004429, exon 5 of 5)	12700	NM_004429	1947	Hs.144700	NM_004429	ENSG00000090776	EFNB1	CFND|CFNS|EFL3|EPLG2|Elk-L|LERK2	ephrin-B1	protein-coding
chrX	68215685	68215996	179	NA	Intergenic	Intergenic	167000	NM_004429	1947	Hs.144700	NM_004429	ENSG00000090776	EFNB1	CFND|CFNS|EFL3|EPLG2|Elk-L|LERK2	ephrin-B1	protein-coding
chrX	68088833	68089683	42	NA	Intergenic	L2a|LINE|L2	40418	NM_004429	1947	Hs.144700	NM_004429	ENSG00000090776	EFNB1	CFND|CFNS|EFL3|EPLG2|Elk-L|LERK2	ephrin-B1	protein-coding
chr13	107128132	107128546	208	NA	Intergenic	Intergenic	59049	NM_004093	1948	Hs.149239	NM_004093	ENSG00000125266	EFNB2	EPLG5|HTKL|Htk-L|LERK5	ephrin-B2	protein-coding
chr15	82524271	82524624	131	NA	intron (NM_001040610, intron 5 of 17)	intron (NM_001040610, intron 5 of 17)	30657	NM_024580	79631	Hs.459114	NM_001040610	ENSG00000140598	EFTUD1	FAM42A|HsT19294|RIA1	elongation factor Tu GTP binding domain containing 1	protein-coding
chr4	110962913	110963279	144	NA	Intergenic	Intergenic	129056	NM_001178130	1950	Hs.419815	XM_005262796	ENSG00000138798	EGF	HOMG4|URG	epidermal growth factor	protein-coding
chr9	139519731	139520248	28	NA	Intergenic	Intergenic	-33319	NR_046367	51162	Hs.91481	NM_016215	ENSG00000172889	EGFL7	NEU1|RP11-251M1.2|VE-STATIN|ZNEU1	EGF-like-domain, multiple 7	protein-coding
chr5	38077835	38078297	92	NA	Intergenic	Intergenic	-180445	NM_001205301	133584	Hs.20103	NM_182799	ENSG00000164318	EGFLAM	AGRINL|AGRNL	EGF-like, fibronectin type III and laminin G domains	protein-coding
chr7	55145230	55145859	514	NA	intron (NM_201282, intron 1 of 15)	intron (NM_201282, intron 1 of 15)	58819	NM_005228	1956	Hs.605083	XM_005271746	ENSG00000146648	EGFR	ERBB|ERBB1|HER1|PIG61|mENA	epidermal growth factor receptor	protein-coding
chr7	55200469	55200838	211	NA	intron (NM_201282, intron 1 of 15)	intron (NM_201282, intron 1 of 15)	55989	NR_047551	100507500	Hs.720489	NR_047551	ENSG00000224057	EGFR-AS1	-	EGFR antisense RNA 1	ncRNA
chr7	55249002	55249265	80	NA	exon (NM_005228, exon 20 of 28)	exon (NM_005228, exon 20 of 28)	7509	NR_047551	100507500	Hs.720489	NR_047551	ENSG00000224057	EGFR-AS1	-	EGFR antisense RNA 1	ncRNA
chr14	34521071	34521718	851	NA	Intergenic	Intergenic	-101110	NM_022073	112399	Hs.135507	NM_022073	ENSG00000129521	EGLN3	HIFP4H3|HIFPH3|PHD3	egl-9 family hypoxia-inducible factor 3	protein-coding
chr2	62881209	62881440	60	NA	Intergenic	Intergenic	-19662	NM_001142615	23301	Hs.271667	XM_005264225	ENSG00000115504	EHBP1	HPC12|NACSIN	EH domain binding protein 1	protein-coding
chr11	34624768	34625599	1363	NA	Intergenic	Intergenic	-17405	NM_012153	26298	Hs.653859	XM_005252857		EHF	ESE3|ESE3B|ESEJ	ets homologous factor	protein-coding
chr11	34621923	34622408	134	NA	Intergenic	Intergenic	-20423	NM_012153	26298	Hs.653859	XM_005252857		EHF	ESE3|ESE3B|ESEJ	ets homologous factor	protein-coding
chr11	34675506	34675960	86	NA	intron (NM_001206616, intron 6 of 8)	intron (NM_001206616, intron 6 of 8)	21722	NM_001206616	26298	Hs.653859	XM_005252857		EHF	ESE3|ESE3B|ESEJ	ets homologous factor	protein-coding
chr9	140683119	140684191	571	NA	intron (NM_024757, intron 15 of 26)	CpG	26181	NR_024341	643210	Hs.721002	NM_001039765		EHMT1-IT1	-	EHMT1 intronic transcript 1	ncRNA
chr15	49148078	49148375	55	NA	exon (NM_203349, exon 8 of 12)	exon (NM_203349, exon 8 of 12)	-22064	NM_014335	23741	Hs.255973	NM_014335	ENSG00000255302	EID1	C15orf3|CRI1|EID-1|IRO45620|PTD014|RBP21	EP300 interacting inhibitor of differentiation 1	protein-coding
chr17	39822017	39822349	52	NA	Intergenic	Intergenic	-22944	NM_005801	10209	Hs.150580	NM_005801		EIF1	A121|EIF-1|EIF1A|ISO1|SUI1	eukaryotic translation initiation factor 1	protein-coding
chr3	40355512	40355725	71	NA	Intergenic	Intergenic	-4429	NR_033965	440952	Hs.660388	NR_033965		EIF1B-AS1	-	EIF1B antisense RNA 1	ncRNA
chr1	45414825	45415258	126	NA	intron (NM_001261418, intron 3 of 10)	L2b|LINE|L2	37353	NM_020365	8891	Hs.533549	NM_001166588	ENSG00000070785	EIF2B3	EIF-2B|EIF2Bgamma	eukaryotic translation initiation factor 2B, subunit 3 gamma, 58kDa	protein-coding
chr12	53386503	53387220	411	NA	Intergenic	MER102b|DNA|hAT-Charlie	-13201	NM_001417	1975	Hs.702041	XM_005268709	ENSG00000063046	EIF4B	EIF-4B|PRO1843	eukaryotic translation initiation factor 4B	protein-coding
chr8	37915799	37916388	495	NA	intron (NM_004095, intron 2 of 2)	MSTC-int|LTR|ERVL-MaLR	28073	NM_004095	1978	Hs.411641	NM_004095	ENSG00000187840	EIF4EBP1	4E-BP1|4EBP1|BP-1|PHAS-I	eukaryotic translation initiation factor 4E binding protein 1	protein-coding
chr8	37915092	37915594	50	NA	intron (NM_004095, intron 2 of 2)	intron (NM_004095, intron 2 of 2)	27323	NM_004095	1978	Hs.411641	NM_004095	ENSG00000187840	EIF4EBP1	4E-BP1|4EBP1|BP-1|PHAS-I	eukaryotic translation initiation factor 4E binding protein 1	protein-coding
chr20	33872432	33872733	239	NA	promoter-TSS (NM_002212)	promoter-TSS (NM_002212)	37	NR_052023	3692	Hs.743992	NM_001267810	ENSG00000242372	EIF6	CAB|EIF3A|ITGB4BP|b(2)gcn|eIF-6|p27(BBP)|p27BBP	eukaryotic translation initiation factor 6	protein-coding
chr13	41579823	41580268	138	NA	intron (NM_172373, intron 1 of 8)	intron (NM_172373, intron 1 of 8)	13463	NM_172373	1997	Hs.135646	XM_005266276	ENSG00000120690	ELF1	-	E74-like factor 1 (ets domain transcription factor)	protein-coding
chr1	202015235	202016255	473	NA	Intergenic	Intergenic	36055	NM_001114309	1999	Hs.603657	XM_005244942	ENSG00000163435	ELF3	EPR-1|ERT|ESE-1|ESX	E74-like factor 3 (ets domain transcription factor, epithelial-specific )	protein-coding
chr1	201987040	201987330	137	NA	TTS (NM_004433)	TTS (NM_004433)	7495	NM_001114309	1999	Hs.603657	XM_005244942	ENSG00000163435	ELF3	EPR-1|ERT|ESE-1|ESX	E74-like factor 3 (ets domain transcription factor, epithelial-specific )	protein-coding
chr1	202027285	202027577	75	NA	Intergenic	AluJb|SINE|Alu	47741	NM_001114309	1999	Hs.603657	XM_005244942	ENSG00000163435	ELF3	EPR-1|ERT|ESE-1|ESX	E74-like factor 3 (ets domain transcription factor, epithelial-specific )	protein-coding
chr1	201987679	201988042	40	NA	Intergenic	Intergenic	8170	NM_001114309	1999	Hs.603657	XM_005244942	ENSG00000163435	ELF3	EPR-1|ERT|ESE-1|ESX	E74-like factor 3 (ets domain transcription factor, epithelial-specific )	protein-coding
chr1	201992211	201992493	32	NA	Intergenic	Intergenic	12662	NM_001114309	1999	Hs.603657	XM_005244942	ENSG00000163435	ELF3	EPR-1|ERT|ESE-1|ESX	E74-like factor 3 (ets domain transcription factor, epithelial-specific )	protein-coding
chr19	18630914	18631127	32	NA	intron (NM_006532, intron 1 of 11)	intron (NM_006532, intron 1 of 11)	1917	NM_006532	8178	Hs.515260	NM_006532	ENSG00000105656	ELL	C19orf17|ELL1|MEN|PPP1R68	elongation factor RNA polymerase II	protein-coding
chr7	73393376	73393770	597	NA	Intergenic	Intergenic	-48546	NM_001278914	2006	Hs.647061	XM_005250187	ENSG00000049540	ELN	SVAS|WBS|WS	elastin	protein-coding
chr7	73392323	73392892	570	NA	Intergenic	Intergenic	-49512	NM_001278914	2006	Hs.647061	XM_005250187	ENSG00000049540	ELN	SVAS|WBS|WS	elastin	protein-coding
chr6	53276377	53276803	41	NA	Intergenic	Intergenic	-62613	NM_001242828	60481	Hs.520189	XM_005249266	ENSG00000012660	ELOVL5	HELO1|dJ483K16.1	ELOVL fatty acid elongase 5	protein-coding
chr4	111054218	111054897	31	NA	intron (NM_024090, intron 1 of 3)	intron (NM_024090, intron 1 of 3)	65214	NM_001130721	79071	Hs.652828	XM_005263207	ENSG00000170522	ELOVL6	FACE|FAE|LCE	ELOVL fatty acid elongase 6	protein-coding
chr8	28058265	28058660	117	NA	Intergenic	Intergenic	107878	NM_001284225	55140	Hs.491336	XM_005273552	ENSG00000134014	ELP3	KAT9	elongator acetyltransferase complex subunit 3	protein-coding
chr1	80158289	80158527	128	NA	Intergenic	MSTC-int|LTR|ERVL-MaLR	-685913	NM_022159	64123	Hs.132314	NM_022159	ENSG00000162618	ELTD1	ETL|KPG_003	EGF, latrophilin and seven transmembrane domain containing 1	protein-coding
chr1	79659300	79659669	127	NA	Intergenic	Intergenic	-186989	NM_022159	64123	Hs.132314	NM_022159	ENSG00000162618	ELTD1	ETL|KPG_003	EGF, latrophilin and seven transmembrane domain containing 1	protein-coding
chr4	101644402	101644618	45	NA	Intergenic	L1MEf|LINE|L1	-48240	NR_046811	100874275	Hs.136318	NR_046811	ENSG00000250223	EMCN-IT3	RP11-115I3.1	EMCN intronic transcript 3 (non-protein coding)	ncRNA
chr2	42418468	42418750	103	NA	intron (NM_001145076, intron 1 of 21)	intron (NM_001145076, intron 1 of 21)	22119	NM_019063	27436	Hs.713173	XM_005264267	ENSG00000143924	EML4	C2orf2|ELP120|EMAP-4|EMAPL4|ROPP120	echinoderm microtubule associated protein like 4	protein-coding
chr12	13394603	13395183	514	NA	Intergenic	MLT2B3|LTR|ERVL	45291	NM_001423	2012	Hs.719042	XM_005253338	ENSG00000134531	EMP1	CL-20|EMP-1|TMP	epithelial membrane protein 1	protein-coding
chr12	13348791	13349580	262	NA	promoter-TSS (NM_001423)	promoter-TSS (NM_001423)	-417	NM_001423	2012	Hs.719042	XM_005253338	ENSG00000134531	EMP1	CL-20|EMP-1|TMP	epithelial membrane protein 1	protein-coding
chr12	13362021	13362401	137	NA	intron (NM_001423, intron 1 of 4)	intron (NM_001423, intron 1 of 4)	12609	NM_001423	2012	Hs.719042	XM_005253338	ENSG00000134531	EMP1	CL-20|EMP-1|TMP	epithelial membrane protein 1	protein-coding
chr5	73937064	73937408	214	NA	promoter-TSS (NM_003633)	promoter-TSS (NM_003633)	13	NM_001256575	8507	Hs.744844	NM_001256574	ENSG00000171617	ENC1	CCL28|ENC-1|KLHL35|KLHL37|NRPB|PIG10|TP53I10	ectodermal-neural cortex 1 (with BTB domain)	protein-coding
chr11	94826021	94826578	458	NA	intron (NM_015036, intron 1 of 1)	intron (NM_015036, intron 1 of 1)	3325	NM_015036	23052	Hs.167115	NM_015036	ENSG00000149218	ENDOD1	-	endonuclease domain containing 1	protein-coding
chr17	78312968	78313249	106	NA	exon (NM_001256071, exon 26 of 68)	exon (NM_001256071, exon 26 of 68)	-75859	NM_001164638	284131	Hs.728933	XM_005257244	ENSG00000173818	ENDOV	-	endonuclease V	protein-coding
chr17	77069614	77069963	155	NA	Intergenic	Intergenic	-1231	NM_001042573	64772	Hs.29288	XM_005257586		ENGASE	-	endo-beta-N-acetylglucosaminidase	protein-coding
chr10	25367969	25368386	137	NA	Intergenic	Intergenic	-16969	NM_001270383	219670	Hs.534486	NM_001270383	ENSG00000151023	ENKUR	C10orf63	enkurin, TRPC channel interacting protein	protein-coding
chr4	83398485	83398785	148	NA	Intergenic	HERV17-int|LTR|ERV1	46909	NM_021204	58478	Hs.18442	XM_005263168	ENSG00000145293	ENOPH1	E1|MASA|MST145|mtnC	enolase-phosphatase 1	protein-coding
chr1	150584067	150584387	84	NA	Intergenic	Intergenic	17382	NM_207045	2029	Hs.632456	XM_005244952	ENSG00000143420	ENSA	ARPP-19e	endosulfine alpha	protein-coding
chr10	97480418	97480922	315	NA	intron (NM_001098175, intron 1 of 9)	HERV17-int|LTR|ERV1	9134	NM_001098175	953	Hs.576612	XM_005270285	ENSG00000138185	ENTPD1	ATPDase|CD39|NTPDase-1	ectonucleoside triphosphate diphosphohydrolase 1	protein-coding
chr9	139949949	139950505	342	NA	Intergenic	Intergenic	-1724	NM_001246	954	Hs.123036	NM_001246	ENSG00000054179	ENTPD2	CD39L1|NTPDase-2	ectonucleoside triphosphate diphosphohydrolase 2	protein-coding
chr20	25154587	25154895	355	NA	Intergenic	MER57-int|LTR|ERV1	-21598	NM_001247	955	Hs.500375	XM_005260878	ENSG00000197586	ENTPD6	CD39L2|IL-6SAG|IL6ST2|NTPDase-6|dJ738P15.3	ectonucleoside triphosphate diphosphohydrolase 6 (putative)	protein-coding
chr9	140335904	140336261	96	NA	promoter-TSS (NM_198585)	promoter-TSS (NM_198585)	-181	NM_001033113	377841	Hs.512562	NM_001033113	ENSG00000188833	ENTPD8	E-NTPDase|GLSR2492|NTPDase-8|UNQ2492	ectonucleoside triphosphate diphosphohydrolase 8	protein-coding
chr8	110346517	110346797	96	NA	promoter-TSS (NM_032869)	promoter-TSS (NM_032869)	105	NR_036472	56943	Hs.492555	NM_001193557	ENSG00000120533	ENY2	e(y)2	enhancer of yellow 2 homolog (Drosophila)	protein-coding
chr3	27882755	27883016	137	NA	Intergenic	Intergenic	-118679	NM_001278183	8320	Hs.734211	XM_005265509	ENSG00000163508	EOMES	TBR2	eomesodermin	protein-coding
chr2	46527603	46528267	473	NA	intron (NM_001430, intron 1 of 15)	intron (NM_001430, intron 1 of 15)	3394	NM_001430	2034	Hs.468410	NM_001430	ENSG00000116016	EPAS1	ECYT4|HIF2A|HLF|MOP2|PASD2|bHLHe73	endothelial PAS domain protein 1	protein-coding
chr2	46563094	46563522	259	NA	intron (NM_001430, intron 1 of 15)	intron (NM_001430, intron 1 of 15)	38767	NM_001430	2034	Hs.468410	NM_001430	ENSG00000116016	EPAS1	ECYT4|HIF2A|HLF|MOP2|PASD2|bHLHe73	endothelial PAS domain protein 1	protein-coding
chr2	46542375	46542895	163	NA	intron (NM_001430, intron 1 of 15)	intron (NM_001430, intron 1 of 15)	18094	NM_001430	2034	Hs.468410	NM_001430	ENSG00000116016	EPAS1	ECYT4|HIF2A|HLF|MOP2|PASD2|bHLHe73	endothelial PAS domain protein 1	protein-coding
chr2	46534393	46534668	128	NA	intron (NM_001430, intron 1 of 15)	intron (NM_001430, intron 1 of 15)	9989	NM_001430	2034	Hs.468410	NM_001430	ENSG00000116016	EPAS1	ECYT4|HIF2A|HLF|MOP2|PASD2|bHLHe73	endothelial PAS domain protein 1	protein-coding
chr2	46369842	46370162	120	NA	intron (NM_005400, intron 11 of 14)	intron (NM_005400, intron 11 of 14)	-154539	NM_001430	2034	Hs.468410	NM_001430	ENSG00000116016	EPAS1	ECYT4|HIF2A|HLF|MOP2|PASD2|bHLHe73	endothelial PAS domain protein 1	protein-coding
chr2	46219571	46219796	40	NA	intron (NM_005400, intron 6 of 14)	intron (NM_005400, intron 6 of 14)	-304858	NM_001430	2034	Hs.468410	NM_001430	ENSG00000116016	EPAS1	ECYT4|HIF2A|HLF|MOP2|PASD2|bHLHe73	endothelial PAS domain protein 1	protein-coding
chr20	34671105	34671465	103	NA	Intergenic	MER41A|LTR|ERV1	-8141	NM_001258331	2036	Hs.437422	XM_005260318	ENSG00000088367	EPB41L1	4.1N|MRD11	erythrocyte membrane protein band 4.1-like 1	protein-coding
chr18	5601293	5601515	60	NA	intron (NM_001281535, intron 3 of 21)	intron (NM_001281535, intron 3 of 21)	27586	NM_001281535	23136	Hs.213394	XM_005258084	ENSG00000082397	EPB41L3	4.1B|DAL-1|DAL1	erythrocyte membrane protein band 4.1-like 3	protein-coding
chr9	112069600	112069979	474	NA	intron (NM_019114, intron 1 of 25)	intron (NM_019114, intron 1 of 25)	13455	NM_019114	54566	Hs.591901	NM_018424	ENSG00000095203	EPB41L4B	CG1|EHM2	erythrocyte membrane protein band 4.1 like 4B	protein-coding
chr9	112107716	112107995	135	NA	Intergenic	Intergenic	-24611	NM_018424	54566	Hs.591901	NM_018424	ENSG00000095203	EPB41L4B	CG1|EHM2	erythrocyte membrane protein band 4.1 like 4B	protein-coding
chr2	47588136	47588478	184	NA	Intergenic	Intergenic	-7980	NM_002354	4072	Hs.542050	NM_002354	ENSG00000119888	EPCAM	DIAR5|EGP-2|EGP314|EGP40|ESA|HNPCC8|KS1/4|KSA|M4S1|MIC18|MK-1|TACSTD1|TROP1	epithelial cell adhesion molecule	protein-coding
chr1	16470001	16470644	243	NA	intron (NM_004431, intron 3 of 16)	intron (NM_004431, intron 3 of 16)	12260	NM_004431	1969	Hs.171596	XM_005245751	ENSG00000142627	EPHA2	ARCC2|CTPA|CTPP1|CTRCT6|ECK	EPH receptor A2	protein-coding
chr1	16470001	16470644	62	NA	intron (NM_004431, intron 3 of 16)	intron (NM_004431, intron 3 of 16)	12260	NM_004431	1969	Hs.171596	XM_005245751	ENSG00000142627	EPHA2	ARCC2|CTPA|CTPP1|CTRCT6|ECK	EPH receptor A2	protein-coding
chr3	90185548	90186273	1658	NA	Intergenic	MLT1B-int|LTR|ERVL-MaLR	1029236	NM_182644	2042	Hs.123642	XM_005264715	ENSG00000044524	EPHA3	EK4|ETK|ETK1|HEK|HEK4|TYRO4	EPH receptor A3	protein-coding
chr3	90294102	90294459	254	NA	Intergenic	MSTD-int|LTR|ERVL-MaLR	1137606	NM_182644	2042	Hs.123642	XM_005264715	ENSG00000044524	EPHA3	EK4|ETK|ETK1|HEK|HEK4|TYRO4	EPH receptor A3	protein-coding
chr3	89746210	89746739	177	NA	Intergenic	MER50|LTR|ERV1	589800	NM_182644	2042	Hs.123642	XM_005264715	ENSG00000044524	EPHA3	EK4|ETK|ETK1|HEK|HEK4|TYRO4	EPH receptor A3	protein-coding
chr2	222596375	222596573	41	NA	Intergenic	Intergenic	-159464	NM_004438	2043	Hs.371218	XM_005246374	ENSG00000116106	EPHA4	HEK8|SEK|TYRO1	EPH receptor A4	protein-coding
chr4	67440596	67441524	504	NA	Intergenic	LTR25|LTR|ERV1	-904847	NM_001281767	2044	Hs.654492	XM_005265650	ENSG00000145242	EPHA5	CEK7|EHK-1|EHK1|EK7|HEK7|TYRO4	EPH receptor A5	protein-coding
chr6	93536418	93536802	158	NA	Intergenic	MER4-int|LTR|ERV1	592690	NM_001288630	2045	Hs.73962	XM_005248669	ENSG00000135333	EPHA7	EHK-3|EHK3|EK11|HEK11	EPH receptor A7	protein-coding
chr3	134825158	134825704	2218	NA	exon (NM_004441, exon 4 of 16)	exon (NM_004441, exon 4 of 16)	311332	NM_004441	2047	Hs.116092	NM_004441	ENSG00000154928	EPHB1	ELK|EPHT2|Hek6|NET	EPH receptor B1	protein-coding
chr1	23028830	23029225	76	NA	Intergenic	Intergenic	-8304	NM_004442	2048	Hs.523329	XM_005245775	ENSG00000133216	EPHB2	CAPB|DRT|EK5|EPHT3|ERK|Hek5|PCBC|Tyro5	EPH receptor B2	protein-coding
chr7	100429067	100429730	280	NA	Intergenic	Intergenic	-4255	NM_004444	2050	Hs.437008	XM_005250189	ENSG00000196411	EPHB4	HTK|MYK1|TYRO11	EPH receptor B4	protein-coding
chr7	100399606	100400124	60	NA	TTS (NM_004444)	TTS (NM_004444)	25278	NM_004444	2050	Hs.437008	XM_005250189	ENSG00000196411	EPHB4	HTK|MYK1|TYRO11	EPH receptor B4	protein-coding
chr7	100399606	100400124	30	NA	TTS (NM_004444)	TTS (NM_004444)	25278	NM_004444	2050	Hs.437008	XM_005250189	ENSG00000196411	EPHB4	HTK|MYK1|TYRO11	EPH receptor B4	protein-coding
chr1	226001279	226001487	100	NA	intron (NM_001136018, intron 1 of 8)	intron (NM_001136018, intron 1 of 8)	3586	NM_001136018	2052	Hs.89649	XM_005273085	ENSG00000143819	EPHX1	EPHX|EPOX|HYL1|MEH	epoxide hydrolase 1, microsomal (xenobiotic)	protein-coding
chr8	27348315	27348627	137	NA	promoter-TSS (NM_001256484)	promoter-TSS (NM_001256484)	-48	NM_001256483	2053	Hs.212088	NM_001256482	ENSG00000120915	EPHX2	CEH|SEH	epoxide hydrolase 2, cytoplasmic	protein-coding
chr19	15359586	15359931	138	NA	3' UTR (NM_014299, exon 12 of 12)	3' UTR (NM_014299, exon 12 of 12)	-15900	NM_001142886	79852	Hs.156457	NM_001142886	ENSG00000105131	EPHX3	ABHD9|EH3	epoxide hydrolase 3	protein-coding
chr19	56195052	56195504	163	NA	intron (NM_013333, intron 2 of 9)	MER46C|DNA|TcMar-Tigger	7287	NM_001130071	29924	Hs.279953	XM_005258829	ENSG00000063245	EPN1	-	epsin 1	protein-coding
chr19	56179389	56179645	158	NA	intron (NM_001012478, intron 7 of 11)	intron (NM_001012478, intron 7 of 11)	-7044	NM_013333	29924	Hs.279953	XM_005258829	ENSG00000063245	EPN1	-	epsin 1	protein-coding
chr19	56199849	56200102	25	NA	intron (NM_013333, intron 3 of 9)	intron (NM_013333, intron 3 of 9)	11984	NM_001130071	29924	Hs.279953	XM_005258829	ENSG00000063245	EPN1	-	epsin 1	protein-coding
chr8	144980132	144980809	48	NA	Intergenic	Intergenic	-27838	NM_031308	83481	Hs.743673	NM_031308		EPPK1	EPIPL|EPIPL1	epiplakin 1	protein-coding
chr1	51983781	51984344	76	NA	intron (NM_001981, intron 1 of 24)	intron (NM_001981, intron 1 of 24)	933	NM_001981	2060	Hs.83722	XM_005270617	ENSG00000085832	EPS15	AF-1P|AF1P|MLLT5	epidermal growth factor receptor pathway substrate 15	protein-coding
chr12	15933341	15933776	549	NA	intron (NM_004447, intron 1 of 20)	intron (NM_004447, intron 1 of 20)	8952	NM_004447	2059	Hs.591160	XM_005253339	ENSG00000151491	EPS8	-	epidermal growth factor receptor pathway substrate 8	protein-coding
chr12	15865643	15866101	410	NA	intron (NM_004447, intron 1 of 20)	intron (NM_004447, intron 1 of 20)	76638	NM_004447	2059	Hs.591160	XM_005253339	ENSG00000151491	EPS8	-	epidermal growth factor receptor pathway substrate 8	protein-coding
chr12	15942545	15942821	86	NA	promoter-TSS (NM_004447)	promoter-TSS (NM_004447)	-173	NM_004447	2059	Hs.591160	XM_005253339	ENSG00000151491	EPS8	-	epidermal growth factor receptor pathway substrate 8	protein-coding
chr11	712513	713213	1931	NA	intron (NM_022772, intron 4 of 20)	intron (NM_022772, intron 4 of 20)	6743	NM_022772	64787	Hs.55016	XM_005253065	ENSG00000177106	EPS8L2	EPS8R2	EPS8-like 2	protein-coding
chr11	707048	708294	213	NA	intron (NM_022772, intron 1 of 20)	intron (NM_022772, intron 1 of 20)	1551	NM_022772	64787	Hs.55016	XM_005253065	ENSG00000177106	EPS8L2	EPS8R2	EPS8-like 2	protein-coding
chr11	707048	708294	96	NA	intron (NM_022772, intron 1 of 20)	intron (NM_022772, intron 1 of 20)	1551	NM_022772	64787	Hs.55016	XM_005253065	ENSG00000177106	EPS8L2	EPS8R2	EPS8-like 2	protein-coding
chr1	110306314	110306888	845	NA	promoter-TSS (NM_024526)	promoter-TSS (NM_024526)	43	NM_139053	79574	Hs.485352	XM_005271193	ENSG00000198758	EPS8L3	EPS8R3	EPS8-like 3	protein-coding
chr2	26568538	26568950	51	NA	promoter-TSS (NM_033505)	promoter-TSS (NM_033505)	-210	NM_033505	85465	Hs.189073	NM_033505	ENSG00000138018	EPT1	SELI|SEPI	ethanolaminephosphotransferase 1 (CDP-ethanolamine-specific)	protein-coding
chr9	27371376	27371704	286	NA	intron (NM_024761, intron 2 of 3)	intron (NM_024761, intron 2 of 3)	-74403	NM_001161585	54586	Hs.163070	XM_005251488	ENSG00000120160	EQTN	AFAF|C9orf11|SPACA8|equatorin	equatorin, sperm acrosome associated	protein-coding
chr9	27382425	27382708	154	NA	intron (NM_024761, intron 2 of 3)	intron (NM_024761, intron 2 of 3)	-85429	NM_001161585	54586	Hs.163070	XM_005251488	ENSG00000120160	EQTN	AFAF|C9orf11|SPACA8|equatorin	equatorin, sperm acrosome associated	protein-coding
chr17	37861862	37862791	3227	NA	intron (NM_004448, intron 1 of 26)	intron (NM_004448, intron 1 of 26)	6072	NM_004448	2064	Hs.446352	XM_005257139	ENSG00000141736	ERBB2	CD340|HER-2|HER-2/neu|HER2|MLN 19|NEU|NGL|TKR1	v-erb-b2 avian erythroblastic leukemia viral oncogene homolog 2	protein-coding
chr17	37857445	37858286	1182	NA	intron (NM_004448, intron 1 of 26)	intron (NM_004448, intron 1 of 26)	1611	NM_004448	2064	Hs.446352	XM_005257139	ENSG00000141736	ERBB2	CD340|HER-2|HER-2/neu|HER2|MLN 19|NEU|NGL|TKR1	v-erb-b2 avian erythroblastic leukemia viral oncogene homolog 2	protein-coding
chr17	37851650	37852083	378	NA	intron (NM_001005862, intron 4 of 29)	intron (NM_001005862, intron 4 of 29)	-4388	NM_004448	2064	Hs.446352	XM_005257139	ENSG00000141736	ERBB2	CD340|HER-2|HER-2/neu|HER2|MLN 19|NEU|NGL|TKR1	v-erb-b2 avian erythroblastic leukemia viral oncogene homolog 2	protein-coding
chr17	37856021	37856283	99	NA	promoter-TSS (NM_004448)	promoter-TSS (NM_004448)	-102	NM_004448	2064	Hs.446352	XM_005257139	ENSG00000141736	ERBB2	CD340|HER-2|HER-2/neu|HER2|MLN 19|NEU|NGL|TKR1	v-erb-b2 avian erythroblastic leukemia viral oncogene homolog 2	protein-coding
chr17	37863340	37863585	56	NA	intron (NM_001005862, intron 5 of 29)	intron (NM_001005862, intron 5 of 29)	7208	NM_004448	2064	Hs.446352	XM_005257139	ENSG00000141736	ERBB2	CD340|HER-2|HER-2/neu|HER2|MLN 19|NEU|NGL|TKR1	v-erb-b2 avian erythroblastic leukemia viral oncogene homolog 2	protein-coding
chr17	37861113	37861319	34	NA	intron (NM_004448, intron 1 of 26)	MIRb|SINE|MIR	4962	NM_004448	2064	Hs.446352	XM_005257139	ENSG00000141736	ERBB2	CD340|HER-2|HER-2/neu|HER2|MLN 19|NEU|NGL|TKR1	v-erb-b2 avian erythroblastic leukemia viral oncogene homolog 2	protein-coding
chr12	56475486	56476148	1926	NA	intron (NM_001005915, intron 1 of 2)	intron (NM_001005915, intron 1 of 2)	1925	NM_001005915	2065	Hs.622058	NM_001005915	ENSG00000065361	ERBB3	ErbB-3|HER3|LCCS2|MDA-BF-1|c-erbB-3|c-erbB3|erbB3-S|p180-ErbB3|p45-sErbB3|p85-sErbB3	v-erb-b2 avian erythroblastic leukemia viral oncogene homolog 3	protein-coding
chr21	39899665	39900165	358	NA	intron (NM_001243428, intron 3 of 11)	MLT1C|LTR|ERVL-MaLR	-29487	NM_182918	2078	Hs.473819	NM_001136154	ENSG00000157554	ERG	erg-3|p55	v-ets avian erythroblastosis virus E26 oncogene homolog	protein-coding
chr5	172285683	172286074	311	NA	intron (NM_001031711, intron 1 of 9)	intron (NM_001031711, intron 1 of 9)	24655	NM_001031711	57222	Hs.509163	NM_001031711	ENSG00000113719	ERGIC1	ERGIC-32|ERGIC32|NET24	endoplasmic reticulum-golgi intermediate compartment (ERGIC) 1	protein-coding
chr20	34164092	34164361	39	NA	Intergenic	Intergenic	34448	NM_015966	51614	Hs.472558	NM_015966	ENSG00000125991	ERGIC3	C20orf47|CGI-54|Erv46|NY-BR-84|PRO0989|SDBCAG84|dJ477O4.2	ERGIC and golgi 3	protein-coding
chr8	8869528	8869929	246	NA	intron (NM_153332, intron 3 of 6)	intron (NM_153332, intron 3 of 6)	9414	NM_153332	90459	Hs.20000	XM_005272401	ENSG00000104626	ERI1	3'HEXO|HEXO|THEX1	exoribonuclease 1	protein-coding
chr1	44793046	44793782	1111	NA	intron (NM_024066, intron 3 of 8)	intron (NM_024066, intron 3 of 8)	27525	NM_024066	79033	Hs.731413	XM_005271183	ENSG00000117419	ERI3	PINT1|PRNPIP	ERI1 exoribonuclease family member 3	protein-coding
chr17	62161476	62162371	761	NA	intron (NM_001433, intron 2 of 21)	MIRb|SINE|MIR	45579	NM_001433	2081	Hs.744953	XM_005257141	ENSG00000178607	ERN1	IRE1|IRE1P|IRE1a|hIRE1p	endoplasmic reticulum to nucleus signaling 1	protein-coding
chr14	53167405	53167822	122	NA	Intergenic	Intergenic	-5194	NM_014584	30001	Hs.592304	NM_014584		ERO1L	ERO1-alpha|ERO1A|ERO1LA	ERO1-like (S. cerevisiae)	protein-coding
chr18	19130488	19130688	42	NA	intron (NM_052911, intron 8 of 11)	intron (NM_052911, intron 8 of 11)	50105	NM_052911	114799	Hs.464733	XR_243845	ENSG00000141446	ESCO1	A930014I12Rik|CTF|ECO1|EFO1|ESO1	establishment of sister chromatid cohesion N-acetyltransferase 1	protein-coding
chr13	47261843	47262176	201	NA	exon (NM_001164213, exon 6 of 19)	exon (NM_001164213, exon 6 of 19)	109358	NM_001984	2098	Hs.432491	XM_005266278	ENSG00000139684	ESD	FGH	esterase D	protein-coding
chr13	47258474	47258977	94	NA	intron (NM_015116, intron 4 of 18)	intron (NM_015116, intron 4 of 18)	112642	NM_001984	2098	Hs.432491	XM_005266278	ENSG00000139684	ESD	FGH	esterase D	protein-coding
chr6	151989910	151990419	429	NA	Intergenic	Intergenic	-21467	NM_001122742	2099	Hs.208124	XM_005266856	ENSG00000091831	ESR1	ER|ESR|ESRA|ESTRR|Era|NR3A1	estrogen receptor 1	protein-coding
chr11	64073489	64073745	50	NA	promoter-TSS (NM_001282450)	promoter-TSS (NM_001282450)	-82	NM_001282450	2101	Hs.110849	XM_005273817	ENSG00000173153	ESRRA	ERR1|ERRa|ERRalpha|ESRL1|NR3B1	estrogen-related receptor alpha	protein-coding
chr1	217178131	217178495	70	NA	intron (NM_001243509, intron 1 of 8)	Charlie19a|DNA|hAT-Charlie	-65296	NM_001243510	2104	Hs.738938	NM_001134285	ENSG00000196482	ESRRG	ERR3|ERRgamma|NR3B3	estrogen-related receptor gamma	protein-coding
chrX	103563182	103563870	800	NA	Intergenic	MIR|SINE|MIR	-63927	NM_153448	80712	Hs.223782	NM_153448	ENSG00000123576	ESX1	ESX1L|ESXR1	ESX homeobox 1	protein-coding
chr7	158611138	158611475	67	NA	intron (NM_020728, intron 1 of 21)	intron (NM_020728, intron 1 of 21)	11013	NM_020728	57488	Hs.490795	XM_005249551	ENSG00000117868	ESYT2	CHR2SYT|E-Syt2|FAM62B	extended synaptotagmin-like protein 2	protein-coding
chr2	67806332	67806635	215	NA	Intergenic	Intergenic	182041	NM_019002	54465	Hs.353022	XM_005264374	ENSG00000143971	ETAA1	ETAA16	Ewing tumor-associated antigen 1	protein-coding
chr2	67682593	67682992	128	NA	Intergenic	Intergenic	58350	NM_019002	54465	Hs.353022	XM_005264374	ENSG00000143971	ETAA1	ETAA16	Ewing tumor-associated antigen 1	protein-coding
chr15	76603353	76603836	107	NA	intron (NM_000126, intron 1 of 11)	CpG	216	NM_000126	2108	Hs.39925	NM_000126	ENSG00000140374	ETFA	EMA|GA2|MADD	electron-transfer-flavoprotein, alpha polypeptide	protein-coding
chr19	51865810	51866492	90	NA	intron (NM_001985, intron 1 of 5)	L2a|LINE|L2	3521	NM_001985	2109	Hs.348531	NM_001014763	ENSG00000105379	ETFB	MADD	electron-transfer-flavoprotein, beta polypeptide	protein-coding
chr19	44029678	44030195	93	NA	intron (NM_014297, intron 3 of 6)	MER96|DNA|hAT	1460	NM_014297	23474	Hs.7486	XM_005258686	ENSG00000105755	ETHE1	HSCO|YF13H12	ethylmalonic encephalopathy 1	protein-coding
chr11	128318191	128318825	906	NA	Intergenic	Intergenic	73697	NM_005238	2113	Hs.369438	XM_005271428	ENSG00000134954	ETS1	ETS-1|EWSR2	v-ets avian erythroblastosis virus E26 oncogene homolog 1	protein-coding
chr11	128337282	128337710	354	NA	intron (NM_001162422, intron 2 of 3)	intron (NM_001162422, intron 2 of 3)	54709	NM_005238	2113	Hs.369438	XM_005271428	ENSG00000134954	ETS1	ETS-1|EWSR2	v-ets avian erythroblastosis virus E26 oncogene homolog 1	protein-coding
chr11	128294756	128295409	274	NA	Intergenic	Intergenic	97123	NM_005238	2113	Hs.369438	XM_005271428	ENSG00000134954	ETS1	ETS-1|EWSR2	v-ets avian erythroblastosis virus E26 oncogene homolog 1	protein-coding
chr11	128080336	128080747	224	NA	Intergenic	Intergenic	311664	NM_005238	2113	Hs.369438	XM_005271428	ENSG00000134954	ETS1	ETS-1|EWSR2	v-ets avian erythroblastosis virus E26 oncogene homolog 1	protein-coding
chr11	128294756	128295409	218	NA	Intergenic	Intergenic	97123	NM_005238	2113	Hs.369438	XM_005271428	ENSG00000134954	ETS1	ETS-1|EWSR2	v-ets avian erythroblastosis virus E26 oncogene homolog 1	protein-coding
chr11	128161758	128162104	175	NA	Intergenic	Intergenic	230274	NM_005238	2113	Hs.369438	XM_005271428	ENSG00000134954	ETS1	ETS-1|EWSR2	v-ets avian erythroblastosis virus E26 oncogene homolog 1	protein-coding
chr11	128212516	128212961	60	NA	Intergenic	Intergenic	179467	NM_005238	2113	Hs.369438	XM_005271428	ENSG00000134954	ETS1	ETS-1|EWSR2	v-ets avian erythroblastosis virus E26 oncogene homolog 1	protein-coding
chr7	14343129	14343535	271	NA	intron (NM_145695, intron 22 of 23)	intron (NM_145695, intron 22 of 23)	-312282	NM_001163148	2115	Hs.22634	XM_005249635	ENSG00000006468	ETV1	ER81	ets variant 1	protein-coding
chr7	13862147	13862514	143	NA	Intergenic	MLT2A2|LTR|ERVL	163809	NM_001163150	2115	Hs.22634	XM_005249635	ENSG00000006468	ETV1	ER81	ets variant 1	protein-coding
chr1	157210264	157210791	741	NA	Intergenic	Intergenic	-102144	NM_001145312	2117	Hs.105636	NM_001145312	ENSG00000117036	ETV3	METS|PE-1|PE1|bA110J1.4	ets variant 3	protein-coding
chr1	157124719	157125260	358	NA	Intergenic	Intergenic	-16606	NM_001145312	2117	Hs.105636	NM_001145312	ENSG00000117036	ETV3	METS|PE-1|PE1|bA110J1.4	ets variant 3	protein-coding
chr1	157201808	157202202	21	NA	Intergenic	MER50|LTR|ERV1	-93622	NM_001145312	2117	Hs.105636	NM_001145312	ENSG00000117036	ETV3	METS|PE-1|PE1|bA110J1.4	ets variant 3	protein-coding
chr17	41650709	41651118	292	NA	Intergenic	Intergenic	-27113	NM_001079675	2118	Hs.434059	XM_005257142	ENSG00000175832	ETV4	E1A-F|E1AF|PEA3|PEAS3	ets variant 4	protein-coding
chr17	41621657	41622137	214	NA	intron (NM_001986, intron 4 of 12)	intron (NM_001986, intron 4 of 12)	1408	NM_001986	2118	Hs.434059	XM_005257142	ENSG00000175832	ETV4	E1A-F|E1AF|PEA3|PEAS3	ets variant 4	protein-coding
chr12	11882043	11882744	269	NA	intron (NM_001987, intron 1 of 7)	intron (NM_001987, intron 1 of 7)	79605	NM_001987	2120	Hs.504765	NM_001987	ENSG00000139083	ETV6	TEL|TEL/ABL	ets variant 6	protein-coding
chr12	11882043	11882744	175	NA	intron (NM_001987, intron 1 of 7)	intron (NM_001987, intron 1 of 7)	79605	NM_001987	2120	Hs.504765	NM_001987	ENSG00000139083	ETV6	TEL|TEL/ABL	ets variant 6	protein-coding
chr7	27459044	27459774	295	NA	Intergenic	Intergenic	177245	NM_001989	2128	Hs.369879	XM_005249639		EVX1	-	even-skipped homeobox 1	protein-coding
chr7	27316583	27317466	257	NA	Intergenic	AluSx3|SINE|Alu	34860	NM_001989	2128	Hs.369879	XM_005249639		EVX1	-	even-skipped homeobox 1	protein-coding
chr7	27316583	27317466	173	NA	Intergenic	AluSx3|SINE|Alu	34860	NM_001989	2128	Hs.369879	XM_005249639		EVX1	-	even-skipped homeobox 1	protein-coding
chr7	27303310	27303725	146	NA	Intergenic	MIRb|SINE|MIR	21353	NM_001989	2128	Hs.369879	XM_005249639		EVX1	-	even-skipped homeobox 1	protein-coding
chr7	27407217	27407513	138	NA	Intergenic	Intergenic	125201	NM_001989	2128	Hs.369879	XM_005249639		EVX1	-	even-skipped homeobox 1	protein-coding
chr9	140294498	140295078	894	NA	intron (NR_104598, intron 1 of 10)	THE1A-int|LTR|ERVL-MaLR	22926	NM_001286823	54932	Hs.721419	XM_005266091	ENSG00000187609	EXD3	mut-7	exonuclease 3'-5' domain containing 3	protein-coding
chr4	56718153	56718355	81	NA	Intergenic	LTR16E2|LTR|ERVL	-1562	NM_001024924	55763	Hs.269665	XM_005265747	ENSG00000090989	EXOC1	BM-102|SEC3|SEC3L1|SEC3P	exocyst complex component 1	protein-coding
chr10	94569550	94569844	75	NA	Intergenic	L2c|LINE|L2	-24773	NM_001013848	54536	Hs.655657	XM_005269911	ENSG00000138190	EXOC6	EXOC6A|SEC15|SEC15L|SEC15L1|SEC15L3|Sec15p	exocyst complex component 6	protein-coding
chr8	119115838	119116645	1171	NA	intron (NM_000127, intron 1 of 10)	intron (NM_000127, intron 1 of 10)	7817	NM_000127	2131	Hs.492618	NM_000127		EXT1	EXT|LGCR|LGS|TRPS2|TTV	exostosin glycosyltransferase 1	protein-coding
chr8	118926757	118927473	1109	NA	intron (NM_000127, intron 1 of 10)	MER11A|LTR|ERVK	196943	NM_000127	2131	Hs.492618	NM_000127		EXT1	EXT|LGCR|LGS|TRPS2|TTV	exostosin glycosyltransferase 1	protein-coding
chr8	118959820	118960383	386	NA	intron (NM_000127, intron 1 of 10)	intron (NM_000127, intron 1 of 10)	163957	NM_000127	2131	Hs.492618	NM_000127		EXT1	EXT|LGCR|LGS|TRPS2|TTV	exostosin glycosyltransferase 1	protein-coding
chr8	119001490	119001945	181	NA	intron (NM_000127, intron 1 of 10)	L2a|LINE|L2	122341	NM_000127	2131	Hs.492618	NM_000127		EXT1	EXT|LGCR|LGS|TRPS2|TTV	exostosin glycosyltransferase 1	protein-coding
chr8	119090716	119090974	71	NA	intron (NM_000127, intron 1 of 10)	intron (NM_000127, intron 1 of 10)	33213	NM_000127	2131	Hs.492618	NM_000127		EXT1	EXT|LGCR|LGS|TRPS2|TTV	exostosin glycosyltransferase 1	protein-coding
chr8	119043848	119044148	41	NA	intron (NM_000127, intron 1 of 10)	intron (NM_000127, intron 1 of 10)	80060	NM_000127	2131	Hs.492618	NM_000127		EXT1	EXT|LGCR|LGS|TRPS2|TTV	exostosin glycosyltransferase 1	protein-coding
chr6	133802587	133802824	116	NA	exon (NM_172103, exon 11 of 19)	exon (NM_172103, exon 11 of 19)	240210	NM_172105	2070	Hs.596680	XM_005266850	ENSG00000112319	EYA4	CMD1J|DFNA10	eyes absent homolog 4 (Drosophila)	protein-coding
chr6	66443407	66443689	21	NA	Intergenic	Intergenic	-26430	NM_001142800	346007	Hs.25067	NM_001142800	ENSG00000188107	EYS	C6orf178|C6orf179|C6orf180|EGFL10|EGFL11|RP25|SPAM|bA166P24.2|bA307F22.3|bA74E24.1|dJ1018A4.2|dJ22I17.2|dJ303F19.1	eyes shut homolog (Drosophila)	protein-coding
chr13	113776908	113777347	282	NA	promoter-TSS (NM_000504)	promoter-TSS (NM_000504)	14	NM_000504	2159	Hs.361463	XM_005268298	ENSG00000126218	F10	FX|FXA	coagulation factor X	protein-coding
chr1	160983503	160984191	1416	NA	intron (NM_016946, intron 1 of 9)	intron (NM_016946, intron 1 of 9)	7286	NM_016946	50848	Hs.517293	XM_005245227	ENSG00000158769	F11R	CD321|JAM|JAM1|JAMA|JCAM|KAT|PAM-1	F11 receptor	protein-coding
chr6	6244150	6244525	725	NA	intron (NM_000129, intron 6 of 14)	intron (NM_000129, intron 6 of 14)	76587	NM_000129	2162	Hs.335513	NM_000129	ENSG00000124491	F13A1	F13A	coagulation factor XIII, A1 polypeptide	protein-coding
chr6	6258593	6258930	41	NA	intron (NM_000129, intron 4 of 14)	intron (NM_000129, intron 4 of 14)	62163	NM_000129	2162	Hs.335513	NM_000129	ENSG00000124491	F13A1	F13A	coagulation factor XIII, A1 polypeptide	protein-coding
chr11	46739732	46739972	156	NA	promoter-TSS (NM_000506)	promoter-TSS (NM_000506)	-891	NM_000506	2147	Hs.655207	NM_000506	ENSG00000180210	F2	PT|RPRGL2|THPH1	coagulation factor II (thrombin)	protein-coding
chr5	76081258	76081759	444	NA	Intergenic	Intergenic	-33325	NM_005242	2150	Hs.744181	NM_005242	ENSG00000164251	F2RL1	GPR11|PAR2	coagulation factor II (thrombin) receptor-like 1	protein-coding
chr1	95068508	95068864	444	NA	Intergenic	Intergenic	-61273	NM_001993	2152	Hs.62192	NM_001178096	ENSG00000117525	F3	CD142|TF|TFA	coagulation factor III (thromboplastin, tissue factor)	protein-coding
chr1	169534700	169535433	1660	NA	intron (NM_000130, intron 3 of 24)	intron (NM_000130, intron 3 of 24)	20703	NM_000130	2153	Hs.30054	NM_000130		F5	FVL|PCCF|RPRGL1|THPH2	coagulation factor V (proaccelerin, labile factor)	protein-coding
chr1	169539250	169539847	755	NA	intron (NM_000130, intron 3 of 24)	intron (NM_000130, intron 3 of 24)	16221	NM_000130	2153	Hs.30054	NM_000130		F5	FVL|PCCF|RPRGL1|THPH2	coagulation factor V (proaccelerin, labile factor)	protein-coding
chr13	113759903	113760264	141	NA	promoter-TSS (NM_000131)	promoter-TSS (NM_000131)	-19	NM_000131	2155	Hs.36989	NM_000131	ENSG00000057593	F7	SPCA	coagulation factor VII (serum prothrombin conversion accelerator)	protein-coding
chr13	113718658	113719218	76	NA	intron (NM_024979, intron 6 of 29)	intron (NM_024979, intron 6 of 29)	-41164	NM_000131	2155	Hs.36989	NM_000131	ENSG00000057593	F7	SPCA	coagulation factor VII (serum prothrombin conversion accelerator)	protein-coding
chr16	74863608	74863941	115	NA	Intergenic	Intergenic	-55045	NM_024306	79152	Hs.461329	NM_024306	ENSG00000103089	FA2H	FAAH|FAH1|FAXDC1|SCS7|SPG35	fatty acid 2-hydroxylase	protein-coding
chr8	82500015	82500406	240	NA	Intergenic	MLT2A2|LTR|ERVL	-56660	NM_001105281	646486	Hs.586370	XM_005251285	ENSG00000197416	FABP12	-	fatty acid binding protein 12	protein-coding
chr8	82182448	82182714	71	NA	Intergenic	LTR51|LTR|ERV1	-10137	NM_001444	2171	Hs.408061	NM_001444	ENSG00000164687	FABP5	E-FABP|EFABP|KFABP|PA-FABP|PAFABP	fatty acid binding protein 5 (psoriasis-associated)	protein-coding
chr11	70046160	70046738	368	NA	Intergenic	LTR22C|LTR|ERVK	-2820	NM_003824	8772	Hs.86131	NM_003824	ENSG00000168040	FADD	MORT1	Fas (TNFRSF6)-associated via death domain	protein-coding
chr11	70071720	70072261	310	NA	Intergenic	Intergenic	22721	NM_003824	8772	Hs.86131	NM_003824	ENSG00000168040	FADD	MORT1	Fas (TNFRSF6)-associated via death domain	protein-coding
chr12	50281873	50282114	60	NA	intron (NM_012306, intron 10 of 11)	intron (NM_012306, intron 10 of 11)	15767	NM_012306	23017	Hs.567424	XM_005268730	ENSG00000135472	FAIM2	LFG|LFG2|NGP35|NMP35|TMBIM2	Fas apoptotic inhibitory molecule 2	protein-coding
chr1	207100523	207101016	368	NA	Intergenic	L4|LINE|RTE	-5391	NM_005449	9214	Hs.744273	XM_005273351		FAIM3	FCMR|TOSO	Fas apoptotic inhibitory molecule 3	protein-coding
chr12	124723431	124723888	305	NA	intron (NM_001204299, intron 3 of 4)	intron (NM_001204299, intron 3 of 4)	-50051	NM_181709	144347	Hs.432901	XM_005253548	ENSG00000178882	FAM101A	-	family with sequence similarity 101, member A	protein-coding
chr12	124781066	124781507	71	NA	intron (NM_181709, intron 1 of 2)	MER5B|DNA|hAT-Charlie	7576	NM_181709	144347	Hs.432901	XM_005253548	ENSG00000178882	FAM101A	-	family with sequence similarity 101, member A	protein-coding
chr9	130717786	130718204	93	NA	intron (NM_001035254, intron 1 of 10)	L2c|LINE|L2	-5002	NM_203305	399665	Hs.535972	XM_005251984	ENSG00000167106	FAM102A	C9orf132|EEIG1|SYM-3A|bA203J24.7	family with sequence similarity 102, member A	protein-coding
chr9	130717786	130718204	78	NA	intron (NM_001035254, intron 1 of 10)	L2c|LINE|L2	-5002	NM_203305	399665	Hs.535972	XM_005251984	ENSG00000167106	FAM102A	C9orf132|EEIG1|SYM-3A|bA203J24.7	family with sequence similarity 102, member A	protein-coding
chr9	130753305	130753594	46	NA	Intergenic	Intergenic	-10637	NM_001035254	399665	Hs.535972	XM_005251984	ENSG00000167106	FAM102A	C9orf132|EEIG1|SYM-3A|bA203J24.7	family with sequence similarity 102, member A	protein-coding
chr9	130740418	130740787	24	NA	intron (NM_001035254, intron 1 of 10)	intron (NM_001035254, intron 1 of 10)	2210	NM_001035254	399665	Hs.535972	XM_005251984	ENSG00000167106	FAM102A	C9orf132|EEIG1|SYM-3A|bA203J24.7	family with sequence similarity 102, member A	protein-coding
chr1	109126999	109127241	58	NA	intron (NM_001010883, intron 1 of 10)	intron (NM_001010883, intron 1 of 10)	24149	NM_001010883	284611	Hs.200230	XM_005270772	ENSG00000162636	FAM102B	SYM-3B	family with sequence similarity 102, member B	protein-coding
chr5	14551212	14551780	372	NA	Intergenic	LTR40a|LTR|ERVL	-30395	NM_019018	54491	Hs.155085	NM_019018		FAM105A	NET20	family with sequence similarity 105, member A	protein-coding
chr10	14824639	14825171	1132	NA	Intergenic	Intergenic	-8009	NM_001282695	83641	Hs.446315	XM_005252614	ENSG00000065809	FAM107B	C10orf45	family with sequence similarity 107, member B	protein-coding
chr10	14592393	14592930	346	NA	intron (NM_031453, intron 2 of 4)	intron (NM_031453, intron 2 of 4)	21527	NM_001282699	83641	Hs.446315	XM_005252614	ENSG00000065809	FAM107B	C10orf45	family with sequence similarity 107, member B	protein-coding
chr10	14596206	14596414	22	NA	intron (NM_001282695, intron 2 of 5)	intron (NM_001282695, intron 2 of 5)	17878	NM_001282699	83641	Hs.446315	XM_005252614	ENSG00000065809	FAM107B	C10orf45	family with sequence similarity 107, member B	protein-coding
chr12	111805378	111805944	828	NA	intron (NM_001177997, intron 1 of 2)	intron (NM_001177997, intron 1 of 2)	1264	NM_001177996	144717	Hs.173088	XM_005253852	ENSG00000198324	FAM109A	IPIP27A|SES1	family with sequence similarity 109, member A	protein-coding
chr12	111777345	111777618	50	NA	intron (NM_015267, intron 20 of 21)	intron (NM_015267, intron 20 of 21)	29444	NM_001177996	144717	Hs.173088	XM_005253852	ENSG00000198324	FAM109A	IPIP27A|SES1	family with sequence similarity 109, member A	protein-coding
chr8	58991406	58991937	892	NA	intron (NM_147189, intron 4 of 4)	intron (NM_147189, intron 4 of 4)	84558	NM_147189	90362	Hs.154652	XM_005251324	ENSG00000169122	FAM110B	C8orf72	family with sequence similarity 110, member B	protein-coding
chr8	58716699	58717252	738	NA	Intergenic	Intergenic	-190138	NM_147189	90362	Hs.154652	XM_005251324	ENSG00000169122	FAM110B	C8orf72	family with sequence similarity 110, member B	protein-coding
chr8	58980228	58980515	65	NA	intron (NM_147189, intron 3 of 4)	intron (NM_147189, intron 3 of 4)	73258	NM_147189	90362	Hs.154652	XM_005251324	ENSG00000169122	FAM110B	C8orf72	family with sequence similarity 110, member B	protein-coding
chr9	96218780	96219068	49	NA	intron (NM_014612, intron 1 of 17)	MIRb|SINE|MIR	-3050	NM_198841	158293	Hs.709859	XM_005251736	ENSG00000188938	FAM120AOS	C9orf10OS	family with sequence similarity 120A opposite strand	protein-coding
chr9	71410021	71410273	89	NA	intron (NM_003558, intron 2 of 15)	MIRb|SINE|MIR	15183	NM_138333	116224	Hs.655572	NM_138333	ENSG00000187866	FAM122A	C9orf42	family with sequence similarity 122A	protein-coding
chr9	71509623	71509836	42	NA	intron (NM_001278253, intron 7 of 13)	intron (NM_001278253, intron 7 of 13)	114765	NM_138333	116224	Hs.655572	NM_138333	ENSG00000187866	FAM122A	C9orf42	family with sequence similarity 122A	protein-coding
[truncated: 4,981 more rows]

## Sheet: S3B GATA6 ChIPseq
Chr	Start	End	Peak Score	Focus Ratio/Region Size	Annotation	Detailed Annotation	Distance to TSS	Nearest PromoterID	Entrez ID	Nearest Unigene	Nearest Refseq	Nearest Ensembl	Gene Name	Gene Alias	Gene Description	Gene Type
[truncated: 37,658 more rows]
