# Supplementary material for: Identification of a primitive intestinal transcription factor network shared between esophageal adenocarcinoma and its precancerous precursor state
Source: Genome Res. 2019 May;29(5):723–36. doi: 10.1101/gr.243345.118 (PMC6499311; doi:10.1101/gr.243345.118)
Supplement: Supplemental Material [file supp_gr.243345.118_Supplemental_Table_S4.xlsx]

## Sheet: Legend
Table S4. DNA motifs enriched in HNF4A and GATA6 ChIP-seq datsets. Top 25 motifs found by de novo motif discovery and their associated transcription factors that are enriched in HNF4A (A) or GATA6 (B) ChIP-seq datasets.

## Sheet: S4A HNF4A ChIPseq motifs
Rank	Motif	P-value	log P-pvalue	% of Targets	% of Background	STD(Bg STD)	Best Match/Details
1	TGGACTTTGGAC	1e-3373	-7769	0.4699	0.0212	44.5bp (64.9bp)	HNF4G/MA0484.1/Jaspar(0.955)
2	GATGACTCAT	1e-472	-1088	0.1917	0.0409	54.0bp (61.8bp)	Atf3(bZIP)/GBM-ATF3-ChIP-Seq(GSE33912)/Homer(0.993)
3	CAGTGCTAACTGCGTAACGTCGTACGTATGCA	1e-224	-515.9	0.2943	0.1437	55.6bp (60.5bp)	GATA3(Zf)/iTreg-Gata3-ChIP-Seq(GSE20898)/Homer(0.936)
4	TAGCGATCCGATTCAGCGTACATGAGCTTGCAGTCACGTAGATCCGTA	1e-210	-484.8	0.1483	0.0492	53.9bp (59.3bp)	FOXM1(Forkhead)/MCF7-FOXM1-ChIP-Seq(GSE72977)/Homer(0.960)
5	TCAGTGACGATCGTCAGATCCTGAATGCAGTCAGTCGACT	1e-103	-238	0.153	0.0753	55.1bp (58.0bp)	KLF5(Zf)/LoVo-KLF5-ChIP-Seq(GSE49402)/Homer(0.985)
6	CGTACTAGACGTCTGAACTGAGCTCGATGTACACGTCTAGAGTCACGT	1e-88	-204.4	0.0092	0.0002	46.8bp (47.6bp)	Nkx3.1(Homeobox)/LNCaP-Nkx3.1-ChIP-Seq(GSE28264)/Homer(0.535)
7	ACGTACGTAGTCAGTCAGTCACGTAGTCCGTAACTGCGTACGTAACTG	1e-82	-189.2	0.006	0	43.5bp (31.5bp)	STAT6(Stat)/Macrophage-Stat6-ChIP-Seq(GSE38377)/Homer(0.682)
8	AGCTCTGAACTGCGTATAGCAGTCAGTCACGTACGTCGTAACGTAGTC	1e-80	-184.7	0.0103	0.0003	48.5bp (65.2bp)	Gata1(Zf)/K562-GATA1-ChIP-Seq(GSE18829)/Homer(0.705)
9	CGTAACTGAGCTAGCTCTGACTGACATGCTGAAGTCACGTACGTACGT	1e-77	-178.8	0.0086	0.0002	49.3bp (38.5bp)	PB0136.1_IRC900814_2/Jaspar(0.659)
10	ACGTCGTAACGTCAGTATCGACGTAGTCACGTAGCTCTAGCGTAACGT	1e-70	-162.5	0.0066	0.0001	57.9bp (12.1bp)	Sox17/MA0078.1/Jaspar(0.670)
11	AGTCAGCTACGTACGTCGATACTGCGTAACGT	1e-66	-153.7	0.0553	0.0199	56.0bp (60.3bp)	PB0040.1_Lef1_1/Jaspar(0.805)
12	TGACTCGATCGACTGAAGTCTGACCTAGTCAGGCATAGCT	1e-63	-145.4	0.0648	0.0263	56.7bp (62.9bp)	TFCP2/MA0145.3/Jaspar(0.939)
13	CTGAATGCCGATAGCTGTACATGCACGTATGC	1e-62	-143	0.2576	0.1768	56.9bp (62.7bp)	ETV6/MA0645.1/Jaspar(0.938)
14	CGTACTGAATGCCTGAACGTAGTCACGTACGTCTGACGTACGTAAGTC	1e-60	-139.8	0.0066	0.0001	66.3bp (21.4bp)	PH0085.1_Irx4/Jaspar(0.635)
15	CTGAAGTCGATCCGATTCGAACGTTACGCTGACTAGGATCGTACGACT	1e-59	-136.1	0.0108	0.0007	49.5bp (65.2bp)	RXRB/MA0855.1/Jaspar(0.574)
16	AGTCCGTAAGTCGATCCTAGGTACACGTACTGCGTACGTAAGTCCTGA	1e-54	-126	0.008	0.0003	53.3bp (53.8bp)	MyoG(bHLH)/C2C12-MyoG-ChIP-Seq(GSE36024)/Homer(0.564)
17	CGATGCATGTCAGTCACGATTAGCGCTAAGCTGACTCGTAGCTAGATC	1e-46	-107.6	0.0341	0.0113	57.5bp (60.8bp)	HNF1b(Homeobox)/PDAC-HNF1B-ChIP-Seq(GSE64557)/Homer(0.962)
18	CGTACAGTCTAGACGTAGCTGCTACGTAGCATCGATCGTAGATCGTAC	1e-40	-93.81	0.0033	0	43.6bp (34.2bp)	PH0053.1_Hoxa6/Jaspar(0.823)
19	CTAGACGTCGTACGTACGTACGTAACGTAGTCCGTACGTA	1e-39	-90.22	0.0096	0.0011	53.8bp (57.2bp)	ONECUT3/MA0757.1/Jaspar(0.732)
20	ACGTCTGACTGAAGCTCTAGAGTCACGTCTAGCTGACGTACGTACGTA	1e-33	-77.46	0.0049	0.0002	38.6bp (25.8bp)	IRF:BATF(IRF:bZIP)/pDC-Irf8-ChIP-Seq(GSE66899)/Homer(0.675)
21	ACTGACTGGTACCTGAAGCTCTAGCGTAACGTACGTACTG	1e-28	-64.96	0.0114	0.0023	51.6bp (57.9bp)	Dux/MA0611.1/Jaspar(0.703)
22	AGTCCGTAACGTACGTATGCAGTCCGTACTGA	1e-25	-58.21	0.0597	0.0343	56.2bp (61.3bp)	TEAD3/MA0808.1/Jaspar(0.878)
23	CATGAGTCCGATATCGTAGCAGTCGCTACTAG	1e-24	-56.94	0.1831	0.1382	55.0bp (61.5bp)	NF1-halfsite(CTF)/LNCaP-NF1-ChIP-Seq(Unpublished)/Homer(0.786)
24	ACGTACGTCTGAAGTCCTAGGTACCGTACGTA	1e-24	-55.82	0.0329	0.0154	54.2bp (61.8bp)	CEBPB/MA0466.2/Jaspar(0.949)
25	CGTAACGTACTGGACTAGTCAGTCACGTACGTAGTCACGTAGTCCGTA	1e-20	-48.34	0.0028	0.0001	43.7bp (26.9bp)	SD0003.1_at_AC_acceptor/Jaspar(0.655)

## Sheet: S4B GATA6 ChIPseq motifs
Rank	Motif	P-value	log P-pvalue	% of Targets	% of Background	STD(Bg STD)	Best Match/Details
1	AGTCAGCTACGTCGTAACGTAGTCCGATATCG	1e-3983	-9172	0.4173	0.1339	51.2bp (60.3bp)	Gata6(Zf)/HUG1N-GATA6-ChIP-Seq(GSE51936)/Homer(0.981)
2	CTAGTCGAAGCTCATGCGTAATCGCGATGTACTGCAAGCT	1e-3866	-8904	0.2442	0.045	52.9bp (59.9bp)	Fra2(bZIP)/Striatum-Fra2-ChIP-Seq(GSE43429)/Homer(0.987)
3	CGATCTAGCTGACATGAGCTGTCACGTACGTAAGTCGTCA	1e-1392	-3207	0.2486	0.1036	53.2bp (59.3bp)	FOXM1(Forkhead)/MCF7-FOXM1-ChIP-Seq(GSE72977)/Homer(0.956)
4	CTAGTGACGATCGTCAAGTCCTAGAGTCAGTCGATCGCAT	1e-674	-1553	0.2226	0.12	55.0bp (56.6bp)	KLF5(Zf)/LoVo-KLF5-ChIP-Seq(GSE49402)/Homer(0.960)
5	GTACAGTCGACTCAGTGCATATCGGCTAGCATATGCGCAT	1e-530	-1221	0.1582	0.0808	53.9bp (60.0bp)	Tcf4(HMG)/Hct116-Tcf4-ChIP-Seq(SRA012054)/Homer(0.960)
6	TCGAGATCGCATGCATAGTCATGCACGTACTGAGCTGCAT	1e-516	-1189	0.2205	0.1293	55.1bp (59.2bp)	ELF3(ETS)/PDAC-ELF3-ChIP-Seq(GSE64557)/Homer(0.973)
7	CGTAGTCACGTAACTGACTGCGTACGTAACGTACTGAGCT	1e-252	-581.6	0.0703	0.0341	54.9bp (57.7bp)	TEAD3/MA0808.1/Jaspar(0.970)
8	ACGTAGTCCGTAACTGCGTAAGTCGTCACTAGACTGACGTACGTATGC	1e-249	-575.6	0.0038	0	47.6bp (0.0bp)	Smad2(MAD)/ES-SMAD2-ChIP-Seq(GSE29422)/Homer(0.661)
9	GCTACGTACGTAAGTCAGTCCTGAAGTCCGTA	1e-220	-507.2	0.0688	0.035	54.5bp (59.5bp)	RUNX1(Runt)/Jurkat-RUNX1-ChIP-Seq(GSE29180)/Homer(0.983)
10	CTGACGTACTGAACTGCTAGACGTAGTCGTCA	1e-210	-484.5	0.1358	0.0874	56.1bp (59.5bp)	Nur77(NR)/K562-NR4A1-ChIP-Seq(GSE31363)/Homer(0.970)
11	CTAGATCGTGACCGTAACTGTACGTGACCGATACTGTAGCAGTCGTCA	1e-179	-414	0.051	0.0248	53.6bp (56.2bp)	Tlx?(NR)/NPC-H3K4me1-ChIP-Seq(GSE16256)/Homer(0.921)
12	ACGTAGCTCTGAGTACCTGAGATCCTGAGTCA	1e-174	-401.1	0.0654	0.0355	53.5bp (60.1bp)	CEBPE/MA0837.1/Jaspar(0.866)
13	GCATGCATTCGACGTAGCATTAGCCGTAACGTGCATGCTAGCTAGATC	1e-142	-327.3	0.0174	0.0053	52.8bp (64.0bp)	HNF1b(Homeobox)/PDAC-HNF1B-ChIP-Seq(GSE64557)/Homer(0.983)
14	ACGTAGCTAGTCCTGACGTAACTGCGTAACTGAGTCCGTAACTGCTGA	1e-137	-315.7	0.0028	0.0001	47.2bp (28.7bp)	Nr5a2/MA0505.1/Jaspar(0.616)
15	ATGCGTACGATCGACTGTACGCTAACTGATCGATGCGCATCAGTCTGA	1e-131	-302.9	0.003	0.0001	52.8bp (38.0bp)	AP-2gamma(AP2)/MCF7-TFAP2C-ChIP-Seq(GSE21234)/Homer(0.776)
16	AGTCGCATCTAGATCGTAGCCGTAATCGGATC	1e-128	-296.2	0.2582	0.2064	56.2bp (59.4bp)	NF1-halfsite(CTF)/LNCaP-NF1-ChIP-Seq(Unpublished)/Homer(0.817)
17	CTAGACGTCGTACGTACGTAACGTGACTACGTACTGGCATACTGCTAG	1e-111	-257.4	0.0024	0.0001	50.9bp (51.5bp)	HOXA5/MA0158.1/Jaspar(0.668)
18	ATCGCGATCATGGTACGTCAGACTCTAGAGCTGCTAAGCTCGATCATG	1e-111	-256.9	0.002	0	43.3bp (9.8bp)	PB0104.1_Zscan4_1/Jaspar(0.679)
19	AGTCACGTACTGAGTCCTGACTAGACTGCGTAATCGCTGAAGTCAGTC	1e-106	-246	0.0026	0.0001	61.3bp (15.0bp)	Zic3(Zf)/mES-Zic3-ChIP-Seq(GSE37889)/Homer(0.681)
20	CGTACGATAGTCTGCAAGTCCTGAACGTCATGATGCACGTACGTAGTC	1e-77	-178.6	0.002	0.0001	55.5bp (0.0bp)	POL008.1_DCE_S_I/Jaspar(0.681)
21	GATCCTAGTGACGCATTCAGTCGATCGATAGCGCTACGATCTGACATG	1e-74	-172.1	0.0023	0.0002	49.3bp (55.5bp)	Sox4(HMG)/proB-Sox4-ChIP-Seq(GSE50066)/Homer(0.690)
22	GACTACGTTCGACGTAACTGATGCAGTCATGCCATGACGTATCGTACG	1e-73	-169.5	0.0018	0.0001	51.1bp (38.9bp)	Pitx1(Homeobox)/Chicken-Pitx1-ChIP-Seq(GSE38910)/Homer(0.755)
23	TCGATGCATGCATAGCCTAGATCGTGACCTAGGTACGCTAATGCGATC	1e-69	-159.5	0.0048	0.0009	52.0bp (61.3bp)	PB0009.1_E2F3_1/Jaspar(0.578)
24	CGTAGCATCGTATAGCGATCTCAGTAGCATCGTAGCCGATGACTAGCT	1e-63	-145.9	0.0025	0.0002	48.5bp (56.9bp)	PB0008.1_E2F2_1/Jaspar(0.592)
25	ACTGCGTACGTAACGTCGTAAGTCACGTACTGAGTCACTG	1e-63	-145.3	0.0013	0	45.8bp (0.0bp)	Arid5a/MA0602.1/Jaspar(0.579)
