# Supplementary material for: Identification of a primitive intestinal transcription factor network shared between esophageal adenocarcinoma and its precancerous precursor state
Source: Genome Res. 2019 May;29(5):723–36. doi: 10.1101/gr.243345.118 (PMC6499311; doi:10.1101/gr.243345.118)
Supplement: Supplemental Material [file supp_gr.243345.118_Supplemental_Table_S5.xlsx]

## Sheet: Legend
Table S5. Differentially regulated genes following transcription factor knockdown. Genes whose expression is deregulated by >1.3 fold (p-value<0.05) following either HNF4A (A and B), GATA6 (C and D) or both HNF4A and GATA6 (E and F) depletion. Data are split between genes up- and down-regulated. Only genes representing likely direct targets (i.e. associated with a nearby HNF4A and/or GATA6 peak) …

## Sheet: S5A siHNF4A RNAseq -1.3x
gene	locus	sample_1	sample_2	status	value_1	value_2	log2(fold_change)	test_stat	p_value	q_value	Direct targets n=335 (-1.3x)
ABCC2	chr10:101542462-101611662	siHNF4A	siNT	OK	11.9951	19.1986	0.678552	3.74487	5e-05	0.000661123
ACSL5	chr10:114133915-114188138	siHNF4A	siNT	OK	7.08711	9.34199	0.398533	1.94889	0.0009	0.00770965
ACY3	chr11:67410025-67418130	siHNF4A	siNT	OK	6.32544	10.3599	0.711776	2.92711	5e-05	0.000661123
AGAP1	chr2:236402732-237040444	siHNF4A	siNT	OK	6.46788	8.70494	0.428541	1.93618	0.0016	0.0124762
AGMAT	chr1:15853351-15911605	siHNF4A	siNT	OK	1.19974	3.61501	1.59128	3.63798	5e-05	0.000661123
AIM1L	chr1:26648349-26680621	siHNF4A	siNT	OK	5.44275	9.96428	0.87243	4.49855	5e-05	0.000661123
AJUBA	chr14:23440409-23451848	siHNF4A	siNT	OK	15.8927	26.3188	0.727726	4.03129	5e-05	0.000661123
AKAP2	chr9:112403067-112934791	siHNF4A	siNT	OK	1.41305	4.71678	1.73899	7.89091	5e-05	0.000661123
AKR1C4	chr10:5238797-5260910	siHNF4A	siNT	OK	1.41544	2.45691	0.795594	2.08584	0.00055	0.00511103
ALPPL2	chr2:233271551-233275424	siHNF4A	siNT	OK	2.26814	3.58062	0.6587	2.52154	5e-05	0.000661123
ANKS4B	chr16:21245015-21263750	siHNF4A	siNT	OK	0.336339	3.43454	3.35213	8.48891	5e-05	0.000661123
ANP32E	chr1:150190716-150208504	siHNF4A	siNT	OK	11.6751	15.594	0.417559	2.20165	0.0003	0.00310369
ANXA2	chr15:60639349-60690185	siHNF4A	siNT	OK	521.387	1073.27	1.04159	6.13496	5e-05	0.000661123
ANXA9	chr1:150954498-150968114	siHNF4A	siNT	OK	13.0966	20.671	0.658414	3.27263	5e-05	0.000661123
APOBEC1	chr12:7801995-7818502	siHNF4A	siNT	OK	0.728718	8.86235	3.60426	7.2763	5e-05	0.000661123
AQP11	chr11:77300679-77321401	siHNF4A	siNT	OK	1.67507	4.62777	1.4661	5.23501	5e-05	0.000661123
AQP3	chr9:33441151-33447631	siHNF4A	siNT	OK	70.1094	93.6406	0.417527	2.38647	5e-05	0.000661123
ARAP2	chr4:36067619-36245979	siHNF4A	siNT	OK	1.26055	1.69113	0.423933	1.78519	0.0023	0.0164299
ARC	chr8:143692404-143695833	siHNF4A	siNT	OK	1.22163	4.86403	1.99334	7.31188	5e-05	0.000661123
AREG	chr4:75480628-75490485	siHNF4A	siNT	OK	1.07119	2.18751	1.03007	2.49868	5e-05	0.000661123
ARHGAP17	chr16:24930711-25026675	siHNF4A	siNT	OK	4.91461	6.56807	0.418392	1.94499	0.0006	0.00550262
ARL14	chr3:160394947-160396235	siHNF4A	siNT	OK	4.50025	13.4644	1.58107	6.29284	5e-05	0.000661123
ARRDC4	chr15:98503932-98517068	siHNF4A	siNT	OK	5.87054	8.2687	0.494167	2.4565	5e-05	0.000661123
ASAP1	chr8:131064350-131455906	siHNF4A	siNT	OK	5.53287	7.94824	0.522607	2.7175	5e-05	0.000661123
ATAT1	chr6_ssto_hap7:1926891-1946878	siHNF4A	siNT	OK	2.97901	4.35189	0.546812	2.06403	0.0004	0.00394706
ATG16L1	chr2:234160216-234204320	siHNF4A	siNT	OK	13.8334	18.601	0.427223	2.29382	0.00015	0.00173567
ATP6V0A1	chr17:40610861-40674597	siHNF4A	siNT	OK	18.0578	25.127	0.476618	2.65093	5e-05	0.000661123
AXL	chr19:41725107-41767671	siHNF4A	siNT	OK	0.663922	1.07376	0.693583	2.29501	0.0002	0.00221459
AZGP1	chr7:99564349-99573735	siHNF4A	siNT	OK	32.0986	59.8677	0.899265	4.76712	5e-05	0.000661123
B3GNT5	chr3:182895830-183145855	siHNF4A	siNT	OK	3.11789	7.17739	1.20289	5.58459	5e-05	0.000661123
BCL3	chr19:45251977-45263301	siHNF4A	siNT	OK	16.3383	23.3856	0.517362	2.63277	5e-05	0.000661123
BCL9L	chr11:118754474-118781613	siHNF4A	siNT	OK	17.4337	26.2521	0.59056	3.38919	5e-05	0.000661123
BDKRB2	chr14:96671134-96710666	siHNF4A	siNT	OK	4.87189	7.58611	0.638879	3.12536	5e-05	0.000661123
BEX1	chrX:102317580-102319168	siHNF4A	siNT	OK	23.0137	46.8022	1.02409	4.94463	5e-05	0.000661123
BIRC3	chr11:102188180-102210135	siHNF4A	siNT	OK	2.95262	4.46636	0.597104	2.61703	5e-05	0.000661123
BLOC1S2	chr10:102033034-102046469	siHNF4A	siNT	OK	5.85868	7.87309	0.426356	1.97121	0.00065	0.00587143
BMP2	chr20:6748744-6760910	siHNF4A	siNT	OK	1.50317	2.79939	0.897106	3.36098	5e-05	0.000661123
BTNL8	chr5:180326076-180377906	siHNF4A	siNT	OK	14.2741	32.8373	1.20194	6.21942	5e-05	0.000661123
C12orf36	chr12:13523604-13529679	siHNF4A	siNT	OK	3.05686	7.08252	1.21221	5.38228	5e-05	0.000661123
C19orf77	chr19:3474404-3480540	siHNF4A	siNT	OK	15.7288	51.4455	1.70963	8.04428	5e-05	0.000661123
C3orf52	chr3:111805181-111837073	siHNF4A	siNT	OK	5.12436	8.33936	0.702564	3.12552	5e-05	0.000661123
C4BPB	chr1:207262211-207273337	siHNF4A	siNT	OK	32.2727	44.966	0.478519	2.38877	5e-05	0.000661123
C6orf222	chr6:36283534-36304662	siHNF4A	siNT	OK	1.39691	1.91286	0.45349	1.68679	0.0039	0.0248076
CADPS	chr3:62384020-62861064	siHNF4A	siNT	OK	2.52411	3.33857	0.403455	1.82927	0.001	0.0084175
CALB2	chr16:71392615-71424342	siHNF4A	siNT	OK	0.914767	1.74246	0.929653	2.23018	0.0003	0.00310369
CALML4	chr15:68483042-68498448	siHNF4A	siNT	OK	1.84673	4.63916	1.32889	5.78395	5e-05	0.000661123
CAMSAP3	chr19:7660787-7683196	siHNF4A	siNT	OK	8.91897	13.0383	0.547803	2.87562	5e-05	0.000661123
CAPNS1	chr19:36630917-36641255	siHNF4A	siNT	OK	295.515	507.636	0.780564	4.60155	5e-05	0.000661123
CARD11	chr7:2945709-3083509	siHNF4A	siNT	OK	8.64787	16.0789	0.89475	4.75754	5e-05	0.000661123
CAV2	chr7:116139654-116148595	siHNF4A	siNT	OK	5.5969	9.17602	0.713241	3.4133	5e-05	0.000661123
CBWD5	chr9:70431999-70490177	siHNF4A	siNT	OK	5.46069	8.24966	0.595252	1.71843	0.00865	0.0456634
CCDC163P	chr1:45959597-45965751	siHNF4A	siNT	OK	1.08677	1.70204	0.647214	1.89242	0.0012	0.00985737
CCK	chr3:42299317-42307662	siHNF4A	siNT	OK	167.248	247.033	0.562717	3.04152	5e-05	0.000661123
CCL20	chr2:228678557-228682280	siHNF4A	siNT	OK	0.634919	1.81243	1.51328	2.52526	0.00025	0.00266293
CCND1	chr11:69455872-69469242	siHNF4A	siNT	OK	68.4229	116.06	0.762317	4.48516	5e-05	0.000661123
CCR6	chr6:167525294-167552629	siHNF4A	siNT	OK	0.372696	1.72589	2.21127	5.83114	5e-05	0.000661123
CD82	chr11:44587140-44641315	siHNF4A	siNT	OK	60.4271	78.8617	0.384129	2.16611	0.0001	0.00121867
CDH11	chr16:64980682-65155919	siHNF4A	siNT	OK	4.90428	13.6185	1.47346	7.28617	5e-05	0.000661123
CDHR5	chr11:616564-625067	siHNF4A	siNT	OK	10.0546	13.4251	0.417071	2.09624	0.0004	0.00394706
CDIP1	chr16:4560676-4588816	siHNF4A	siNT	OK	11.3018	14.85	0.393911	2.00882	0.0004	0.00394706
CDK10	chr16:89753075-89768121	siHNF4A	siNT	OK	8.81376	13.0251	0.563469	1.84028	0.00165	0.0127478
CDX2	chr13:28536204-28543505	siHNF4A	siNT	OK	1.55834	2.71053	0.798568	2.74077	5e-05	0.000661123
CEACAM18	chr19:51979837-51986611	siHNF4A	siNT	OK	0.237688	1.8333	2.9473	4.19584	5e-05	0.000661123
CENPV	chr17:16245847-16256812	siHNF4A	siNT	OK	116.879	161.719	0.468483	2.67459	5e-05	0.000661123
CERS2	chr1:150937648-150947479	siHNF4A	siNT	OK	143.847	192.012	0.416666	2.46662	5e-05	0.000661123
CHN2	chr7:29234120-29553944	siHNF4A	siNT	OK	2.3594	3.14933	0.416626	1.71054	0.00365	0.0235262
CITED2	chr6:139693391-139695787	siHNF4A	siNT	OK	16.9342	23.5986	0.47876	2.46334	5e-05	0.000661123
CLCN4	chrX:10124984-10205699	siHNF4A	siNT	OK	3.36851	4.78571	0.506622	2.50813	5e-05	0.000661123
CLDN1	chr3:190023489-190040235	siHNF4A	siNT	OK	2.30701	4.52014	0.970344	4.09907	5e-05	0.000661123
CLIC5	chr6:45866189-46048085	siHNF4A	siNT	OK	0.597057	1.66747	1.48172	4.29527	5e-05	0.000661123
CLRN3	chr10:129676113-129691211	siHNF4A	siNT	OK	1.56137	18.8782	3.59584	11.0415	5e-05	0.000661123
CMTM8	chr3:32280170-32411813	siHNF4A	siNT	OK	12.712	16.9332	0.413656	1.87257	0.00065	0.00587143
CNKSR3	chr6:154726432-154831753	siHNF4A	siNT	OK	4.00526	7.15628	0.837314	3.83431	5e-05	0.000661123
CSRNP1	chr3:39183341-39195102	siHNF4A	siNT	OK	6.41295	9.2019	0.520943	2.531	5e-05	0.000661123
CTGF	chr6:132269316-132272518	siHNF4A	siNT	OK	4.33562	7.46583	0.784064	3.42131	5e-05	0.000661123
CTPS1	chr1:41445006-41478235	siHNF4A	siNT	OK	22.4589	30.4002	0.436797	2.42212	5e-05	0.000661123
CXCL1	chr4:74735108-74737019	siHNF4A	siNT	OK	1.96988	4.02052	1.02927	3.05469	5e-05	0.000661123
CYP2C18	chr10:96443250-96495947	siHNF4A	siNT	OK	0.953901	1.89161	0.987707	3.03004	5e-05	0.000661123
CYR61	chr1:86046443-86049648	siHNF4A	siNT	OK	2.39633	4.28869	0.839715	3.20905	5e-05	0.000661123
DAB2	chr5:39371775-39425335	siHNF4A	siNT	OK	1.77018	2.53345	0.517212	2.14616	0.00025	0.00266293
DENND1A	chr9:126141932-126692417	siHNF4A	siNT	OK	17.8561	24.1677	0.436666	2.12938	0.0001	0.00121867
DGCR5	chr22:18958010-18982142	siHNF4A	siNT	OK	3.2945	5.55797	0.754499	3.32163	5e-05	0.000661123
DGKH	chr13:42614171-42803891	siHNF4A	siNT	OK	1.68583	2.25146	0.417402	1.6502	0.00435	0.0269888
DKFZp434J0226	chr19:46713498-46718094	siHNF4A	siNT	OK	0.647072	1.22195	0.917187	2.06621	0.0009	0.00770965
DKK1	chr10:54074040-54077417	siHNF4A	siNT	OK	11.8614	20.1702	0.765951	3.76264	5e-05	0.000661123
DNAJC22	chr12:49741040-49745685	siHNF4A	siNT	OK	8.77187	30.4603	1.79597	8.77215	5e-05	0.000661123
DOT1L	chr19:2164147-2232577	siHNF4A	siNT	OK	10.6596	13.9619	0.389346	2.17355	0.00015	0.00173567
DST	chr6:56137688-56615138	siHNF4A	siNT	OK	2.41461	4.59427	0.928044	4.84832	5e-05	0.000661123
DUSP18	chr22:31058038-31063872	siHNF4A	siNT	OK	2.61542	3.5926	0.457984	1.77521	0.0023	0.0164299
DUSP4	chr8:29190578-29208267	siHNF4A	siNT	OK	59.5561	86.4456	0.537542	3.16818	5e-05	0.000661123
EDN1	chr6:12290528-12297427	siHNF4A	siNT	OK	1.59264	2.569	0.689786	2.28901	0.00015	0.00173567
EFNA2	chr19:1286152-1301429	siHNF4A	siNT	OK	1.3267	3.99783	1.59138	5.31709	5e-05	0.000661123
EFNB1	chrX:68048839-68062006	siHNF4A	siNT	OK	31.4086	67.3128	1.09972	6.28087	5e-05	0.000661123
EFNB2	chr13:107142078-107187388	siHNF4A	siNT	OK	51.8712	76.0178	0.551405	3.22048	5e-05	0.000661123
EGFR	chr7:55086724-55275031	siHNF4A	siNT	OK	8.93931	13.4606	0.590511	3.15449	5e-05	0.000661123
EIF6	chr20:33866708-33872619	siHNF4A	siNT	OK	231.7	306.908	0.405549	2.35146	5e-05	0.000661123
EPAS1	chr2:46524540-46613842	siHNF4A	siNT	OK	13.6158	20.1175	0.56317	3.12956	5e-05	0.000661123
EPHA2	chr1:16450831-16482582	siHNF4A	siNT	OK	39.7337	54.7695	0.46301	2.67293	5e-05	0.000661123
EPPK1	chr8:144939911-144947434	siHNF4A	siNT	OK	2.73841	3.65449	0.416335	2.02612	0.00035	0.00354815
EPS8	chr12:15773074-15942510	siHNF4A	siNT	OK	19.5414	26.8629	0.459082	2.56441	5e-05	0.000661123
EPS8L3	chr1:110292701-110306644	siHNF4A	siNT	OK	10.8692	31.89	1.55286	7.99892	5e-05	0.000661123
EPT1	chr2:26531040-26618759	siHNF4A	siNT	OK	4.79752	6.93372	0.531341	2.79101	5e-05	0.000661123
ETS1	chr11:128328655-128457453	siHNF4A	siNT	OK	3.81009	6.96688	0.870689	4.29817	5e-05	0.000661123
F10	chr13:113777112-113803843	siHNF4A	siNT	OK	0.679654	1.19078	0.809033	1.77953	0.00325	0.0215091
F2RL1	chr5:76114832-76131140	siHNF4A	siNT	OK	6.44773	11.2154	0.798613	3.86947	5e-05	0.000661123
FAM109A	chr12:111798454-111806925	siHNF4A	siNT	OK	13.3943	28.2151	1.07485	5.73945	5e-05	0.000661123
FAM131C	chr1:16384263-16400127	siHNF4A	siNT	OK	2.53231	3.46097	0.450722	1.56759	0.00635	0.0359786
FAM160A2	chr11:6232563-6255941	siHNF4A	siNT	OK	7.59619	10.816	0.509821	2.55043	5e-05	0.000661123
FER1L6	chr8:124864226-125132302	siHNF4A	siNT	OK	0.681614	1.16507	0.773389	2.77505	5e-05	0.000661123
FGD2	chr6:36973422-36996845	siHNF4A	siNT	OK	0.784661	1.66986	1.08958	3.3784	5e-05	0.000661123
FGFR4	chr5:176513920-176525126	siHNF4A	siNT	OK	20.8539	34.3604	0.720427	3.9382	5e-05	0.000661123
FKBP1B	chr2:24272583-24286550	siHNF4A	siNT	OK	0.863359	1.53968	0.834594	1.62011	0.00735	0.0401462
FLJ22447	chr14:62037257-62121431	siHNF4A	siNT	OK	1.25451	1.94578	0.633226	1.64951	0.00485	0.0292976
FOSB	chr19:45971252-45978437	siHNF4A	siNT	OK	1.58601	2.97569	0.907828	3.58219	5e-05	0.000661123
FRMD3	chr9:85857904-86153348	siHNF4A	siNT	OK	9.3488	12.4603	0.414487	1.72222	0.00295	0.0199426
FUT4	chr11:94277016-94283064	siHNF4A	siNT	OK	5.37893	7.55515	0.490142	2.53809	5e-05	0.000661123
GAB2	chr11:77926335-78128868	siHNF4A	siNT	OK	3.34342	5.03079	0.589462	2.87327	5e-05	0.000661123
GADD45B	chr19:2476122-2478257	siHNF4A	siNT	OK	5.03325	9.87236	0.971906	3.91303	5e-05	0.000661123
GAMT	chr19:1397024-1401569	siHNF4A	siNT	OK	10.3951	15.1821	0.546466	2.37373	0.0001	0.00121867
GATAD2A	chr19:19496641-19619741	siHNF4A	siNT	OK	24.0586	32.458	0.43202	2.4793	5e-05	0.000661123
GCNT3	chr15:59903981-59912210	siHNF4A	siNT	OK	17.633	23.1941	0.395477	2.06996	0.00045	0.00433521
GEM	chr8:95261484-95274547	siHNF4A	siNT	OK	3.88539	7.28507	0.906882	3.83523	5e-05	0.000661123
GJB3	chr1:35246789-35251967	siHNF4A	siNT	OK	24.6134	41.4967	0.753552	4.01387	5e-05	0.000661123
GLI2	chr2:121554866-121750229	siHNF4A	siNT	OK	1.10791	1.55135	0.485683	1.98043	0.00065	0.00587143
GLYCTK	chr3:52321835-52329272	siHNF4A	siNT	OK	5.1396	7.83138	0.607611	1.91757	0.00185	0.0139425
GNA13	chr17:63005406-63052920	siHNF4A	siNT	OK	5.05866	7.84255	0.632566	3.26792	5e-05	0.000661123
GNAL	chr18:11689013-11908796	siHNF4A	siNT	OK	0.909897	2.63916	1.5363	1.92289	0.0064	0.0361968
GPA33	chr1:167022081-167059868	siHNF4A	siNT	OK	0.19624	1.65803	3.07878	6.06413	5e-05	0.000661123
GPD2	chr2:157291964-157442915	siHNF4A	siNT	OK	5.10043	6.99246	0.455181	2.3207	0.0001	0.00121867
GPR110	chr6:46967812-47010082	siHNF4A	siNT	OK	28.2786	37.1485	0.393591	2.12923	0.0002	0.00221459
GPR35	chr2:241544824-241570676	siHNF4A	siNT	OK	15.8736	26.1381	0.719526	3.74455	5e-05	0.000661123
GRB10	chr7:50657759-50861159	siHNF4A	siNT	OK	6.25946	8.92403	0.511658	2.61528	5e-05	0.000661123
GRTP1	chr13:113978504-114018463	siHNF4A	siNT	OK	19.5304	34.4962	0.820716	4.14944	5e-05	0.000661123
HAP1	chr17:39878890-39890898	siHNF4A	siNT	OK	3.47936	4.72274	0.440802	1.98664	0.0006	0.00550262
HDHD3	chr9:116135697-116138341	siHNF4A	siNT	OK	26.1546	40.7939	0.64129	3.41774	5e-05	0.000661123
HES4	chr1:934341-935552	siHNF4A	siNT	OK	13.0853	19.0546	0.542189	2.38303	5e-05	0.000661123
HIST1H4C	chr6:26104175-26104565	siHNF4A	siNT	OK	0.969578	2.72203	1.48925	1.85196	0.0056	0.0328824
HKDC1	chr10:70980058-71027315	siHNF4A	siNT	OK	7.76674	17.3195	1.15702	6.01696	5e-05	0.000661123
HNF1A	chr12:121416548-121440314	siHNF4A	siNT	OK	12.0613	19.0601	0.660173	3.48691	5e-05	0.000661123
HNF4A	chr20:42984440-43061485	siHNF4A	siNT	OK	2.47524	28.7426	3.53755	16.9613	5e-05	0.000661123
HOOK3	chr8:42752032-42885682	siHNF4A	siNT	OK	0.421657	1.17227	1.47516	6.08135	5e-05	0.000661123
HRH1	chr3:11178778-11304939	siHNF4A	siNT	OK	1.0635	1.50596	0.501864	1.81625	0.00155	0.0121389
HS3ST1	chr4:11399987-11430537	siHNF4A	siNT	OK	1.74142	2.62165	0.590206	1.95586	0.0009	0.00770965
HTR1D	chr1:23518387-23521222	siHNF4A	siNT	OK	3.19489	6.76994	1.08338	4.70371	5e-05	0.000661123
ICOSLG	chr21:45646721-45660834	siHNF4A	siNT	OK	10.2538	13.9554	0.444667	2.29266	0.0001	0.00121867
IER2	chr19:13261281-13265718	siHNF4A	siNT	OK	33.591	44.0653	0.391566	2.1549	0.0001	0.00121867
IER3	chr6_ssto_hap7:2043292-2044644	siHNF4A	siNT	OK	67.6327	95.6582	0.500168	2.78353	5e-05	0.000661123
IFNGR1	chr6:137518620-137540567	siHNF4A	siNT	OK	39.422	55.8818	0.503378	2.80756	5e-05	0.000661123
IGF2BP3	chr7:23349827-23509995	siHNF4A	siNT	OK	18.7305	24.9275	0.412352	2.29788	5e-05	0.000661123
IHH	chr2:219919141-219925238	siHNF4A	siNT	OK	13.8755	18.9339	0.44843	2.26695	5e-05	0.000661123
IL17RE	chr3:9944295-9958084	siHNF4A	siNT	OK	4.38863	6.22148	0.503488	2.22929	0.0001	0.00121867
IL22RA1	chr1:24446260-24469775	siHNF4A	siNT	OK	7.14926	16.2322	1.18299	5.92188	5e-05	0.000661123
IL4R	chr16:27325229-27376099	siHNF4A	siNT	OK	13.4706	18.2774	0.440245	2.37287	5e-05	0.000661123
IL6R	chr1:154377668-154441926	siHNF4A	siNT	OK	2.05352	4.21304	1.03676	4.53273	5e-05	0.000661123
INO80C	chr18:33048290-33077955	siHNF4A	siNT	OK	6.92202	9.41121	0.443187	1.70661	0.0029	0.0196997
INPP1	chr2:191208195-191236391	siHNF4A	siNT	OK	11.9099	19.7875	0.732431	3.67884	5e-05	0.000661123
IQGAP3	chr1:156495196-156542396	siHNF4A	siNT	OK	17.3683	27.7072	0.673804	3.84062	5e-05	0.000661123
IRAK2	chr3:10206562-10285427	siHNF4A	siNT	OK	1.77838	3.36123	0.918427	3.65595	5e-05	0.000661123
IRF8	chr16:85932773-85956211	siHNF4A	siNT	OK	7.49428	10.0836	0.428147	2.05922	0.00055	0.00511103
IRS1	chr2:227596032-227663506	siHNF4A	siNT	OK	2.66903	4.68837	0.812772	4.09292	5e-05	0.000661123
ITGA3	chr17:48133339-48167849	siHNF4A	siNT	OK	41.9632	56.0601	0.417851	2.42778	5e-05	0.000661123
ITGB5	chr3:124481794-124606144	siHNF4A	siNT	OK	33.1195	55.9384	0.756157	4.3178	5e-05	0.000661123
ITGB6	chr2:160958232-161056590	siHNF4A	siNT	OK	3.54067	5.01226	0.50144	2.08294	0.0004	0.00394706
JAG1	chr20:10618331-10654694	siHNF4A	siNT	OK	30.2715	43.5944	0.526183	3.05688	5e-05	0.000661123
JMJD1C	chr10:64926987-65226322	siHNF4A	siNT	OK	0.986774	1.42033	0.525433	2.18509	0.00015	0.00173567
JPH1	chr8:75146938-75233562	siHNF4A	siNT	OK	4.27894	7.02442	0.715128	3.47061	5e-05	0.000661123
JUNB	chr19:12902309-12904125	siHNF4A	siNT	OK	37.8388	60.7431	0.682855	3.77114	5e-05	0.000661123
KBTBD11	chr8:1922043-1955109	siHNF4A	siNT	OK	1.88813	2.54721	0.43196	1.94728	0.00065	0.00587143
KCTD15	chr19:34287750-34306666	siHNF4A	siNT	OK	7.83609	12.178	0.636073	3.27455	5e-05	0.000661123
KDM6B	chr17:7743234-7758118	siHNF4A	siNT	OK	2.71397	4.32379	0.671895	3.24416	5e-05	0.000661123
KIAA1211	chr4:57036360-57196890	siHNF4A	siNT	OK	1.36748	2.67791	0.969588	4.26333	5e-05	0.000661123
KIAA1551	chr12:32112352-32146043	siHNF4A	siNT	OK	3.60956	4.95497	0.457054	2.21383	0.0003	0.00310369
KLF10	chr8:103661004-103667983	siHNF4A	siNT	OK	30.2803	46.6234	0.622677	3.52253	5e-05	0.000661123
KLF4	chr9:110247132-110252047	siHNF4A	siNT	OK	27.4909	40.3077	0.5521	3.08759	5e-05	0.000661123
KLF9	chr9:72999512-73029573	siHNF4A	siNT	OK	1.18827	1.63601	0.461319	1.79281	0.0021	0.0153226
KRT16	chr17:39766030-39769079	siHNF4A	siNT	OK	11.5697	40.3806	1.80331	9.04427	5e-05	0.000661123
KRT17	chr17:39775691-39780882	siHNF4A	siNT	OK	65.9815	176.38	1.41856	8.109	5e-05	0.000661123
LAMA3	chr18:21269561-21535029	siHNF4A	siNT	OK	39.3093	56.8074	0.531209	3.0821	5e-05	0.000661123
LAPTM4A	chr2:20232410-20251789	siHNF4A	siNT	OK	45.0181	81.0839	0.848912	4.75019	5e-05	0.000661123
LARP1	chr5:154092461-154197163	siHNF4A	siNT	OK	22.6615	32.9181	0.538634	3.10724	5e-05	0.000661123
LBX2-AS1	chr2:74724643-74734821	siHNF4A	siNT	OK	2.71338	4.78941	0.81976	2.26294	0.00035	0.00354815
LCOR	chr10:98592016-98724198	siHNF4A	siNT	OK	1.32812	2.36943	0.83516	3.6381	5e-05	0.000661123
LGALS4	chr19:39292310-39303740	siHNF4A	siNT	OK	488.65	748.203	0.614628	3.62551	5e-05	0.000661123
LIF	chr22:30636435-30642840	siHNF4A	siNT	OK	4.80751	7.58934	0.658685	3.20225	5e-05	0.000661123
LIG4	chr13:108859791-108870716	siHNF4A	siNT	OK	2.54853	3.41425	0.421904	1.79325	0.00195	0.0144882
LINC00704	chr10:4692376-4720262	siHNF4A	siNT	OK	2.92449	4.63153	0.663301	2.29126	0.0002	0.00221459
LINC00857	chr10:81967465-81979413	siHNF4A	siNT	OK	1.90327	4.41905	1.21526	4.43863	5e-05	0.000661123
LMTK3	chr19:48988527-49016446	siHNF4A	siNT	OK	3.51305	4.67629	0.412642	1.95232	0.00075	0.00662281
LOC100287015	chr8:6261076-6264069	siHNF4A	siNT	OK	0.884028	1.46535	0.729077	2.11322	0.00055	0.00511103
LOC146880	chr17:62745779-62778117	siHNF4A	siNT	OK	1.512	2.39926	0.666135	2.38221	5e-05	0.000661123
LRIG3	chr12:59265936-59314319	siHNF4A	siNT	OK	2.8591	3.7174	0.378729	1.65725	0.00425	0.0265251
LYN	chr8:56792385-56925006	siHNF4A	siNT	OK	37.0179	50.8202	0.45718	2.64018	5e-05	0.000661123
MACC1	chr7:20174278-20257013	siHNF4A	siNT	OK	4.09024	6.70802	0.713703	3.74992	5e-05	0.000661123
MAFB	chr20:39314516-39317876	siHNF4A	siNT	OK	1.05431	1.7355	0.719046	2.45719	5e-05	0.000661123
MAP3K11	chr11:65365225-65381720	siHNF4A	siNT	OK	20.7128	27.9422	0.431922	2.39843	5e-05	0.000661123
MAP3K14	chr17:43325302-43394414	siHNF4A	siNT	OK	5.87754	8.4503	0.523789	2.53879	5e-05	0.000661123
MAST3	chr19:18208602-18262499	siHNF4A	siNT	OK	2.27111	3.73796	0.718854	3.31251	5e-05	0.000661123
MBNL2	chr13:97874549-98046374	siHNF4A	siNT	OK	2.8764	3.7429	0.379893	1.71484	0.00295	0.0199426
MED30	chr8:118532964-118552501	siHNF4A	siNT	OK	19.2136	25.1503	0.388445	1.81433	0.00155	0.0121389
METTL7B	chr12:56075329-56106089	siHNF4A	siNT	OK	15.1732	30.3018	0.99788	4.88622	5e-05	0.000661123
MGAT5B	chr17:74864797-74946471	siHNF4A	siNT	OK	0.755596	1.47093	0.961041	3.22338	5e-05	0.000661123
MGLL	chr3:127407904-127542093	siHNF4A	siNT	OK	15.1387	22.0423	0.542036	3.00292	5e-05	0.000661123
MICALL2	chr7:1473994-1499109	siHNF4A	siNT	OK	19.0744	27.638	0.535017	2.92675	5e-05	0.000661123
MKI67	chr10:129894924-129924468	siHNF4A	siNT	OK	11.4575	15.6043	0.445653	2.56015	5e-05	0.000661123
MLH3	chr14:75480466-75518235	siHNF4A	siNT	OK	1.04601	1.37399	0.39348	1.6256	0.0047	0.0286248
MMP1	chr11:102654406-102714342	siHNF4A	siNT	OK	514.236	723.805	0.493171	2.89101	5e-05	0.000661123
MPRIP	chr17:16946073-17095962	siHNF4A	siNT	OK	15.4163	22.275	0.530969	3.08017	5e-05	0.000661123
MTMR11	chr1:149900542-149908791	siHNF4A	siNT	OK	9.04343	13.4231	0.569777	2.8017	5e-05	0.000661123
MUC13	chr3:124624288-124653595	siHNF4A	siNT	OK	83.203	125.499	0.592967	3.46483	5e-05	0.000661123
MXD1	chr2:70142172-70170076	siHNF4A	siNT	OK	1.97777	3.1072	0.651738	2.8876	5e-05	0.000661123
MYH4	chr17:10346607-10372876	siHNF4A	siNT	OK	0.649277	1.18663	0.869959	3.09928	5e-05	0.000661123
MYO15B	chr17:73584138-73663269	siHNF4A	siNT	OK	0.982878	4.14618	2.0767	6.46976	5e-05	0.000661123
MYO1A	chr12:57422300-57444549	siHNF4A	siNT	OK	4.51619	18.9007	2.06526	10.2588	5e-05	0.000661123
N4BP1	chr16:48572636-48644120	siHNF4A	siNT	OK	3.81774	6.81401	0.835785	4.28347	5e-05	0.000661123
NABP1	chr2:192542797-192553248	siHNF4A	siNT	OK	3.02606	4.30178	0.507494	2.21311	0.00015	0.00173567
NCR3LG1	chr11:17373308-17398868	siHNF4A	siNT	OK	6.18373	9.71075	0.651105	3.45957	5e-05	0.000661123
NEAT1	chr11:65190268-65194003	siHNF4A	siNT	OK	2.25893	3.36771	0.576128	2.4119	0.0001	0.00121867
NHSL1	chr6:138743180-138893668	siHNF4A	siNT	OK	1.28715	1.81875	0.498761	2.11321	0.00035	0.00354815
NMNAT3	chr3:139279022-139396885	siHNF4A	siNT	OK	4.00673	5.99258	0.580752	2.33152	0.0001	0.00121867
NR1D1	chr17:38218445-38256978	siHNF4A	siNT	OK	12.1693	17.4461	0.519657	2.03629	0.00045	0.00433521
NTN4	chr12:96043030-96184536	siHNF4A	siNT	OK	4.65935	6.92519	0.571725	2.70272	5e-05	0.000661123
NTRK2	chr9:87283465-87638505	siHNF4A	siNT	OK	0.695229	1.21415	0.804392	2.98859	5e-05	0.000661123
OPTN	chr10:13142081-13180276	siHNF4A	siNT	OK	6.22028	11.0939	0.834716	4.11243	5e-05	0.000661123
ORC2	chr2:201774893-201828424	siHNF4A	siNT	OK	5.57648	7.79965	0.484056	2.29689	0.0001	0.00121867
OVOL1	chr11:65554504-65564690	siHNF4A	siNT	OK	3.78573	6.19394	0.710286	3.16554	5e-05	0.000661123
P2RY2	chr11:72929343-72947395	siHNF4A	siNT	OK	2.79762	6.05197	1.11321	4.59511	5e-05	0.000661123
PALLD	chr4:169418216-169849608	siHNF4A	siNT	OK	10.3211	15.7325	0.60815	3.26664	5e-05	0.000661123
PARD3	chr10:34398487-35104253	siHNF4A	siNT	OK	13.5892	18.0393	0.408676	2.13475	0.00025	0.00266293
PCDH1	chr5:141232672-141257944	siHNF4A	siNT	OK	79.199	106.265	0.424112	2.47679	5e-05	0.000661123
PCDH9	chr13:66876965-67804468	siHNF4A	siNT	OK	0.283253	1.38815	2.293	6.97804	5e-05	0.000661123
PCSK5	chr9:78505559-78977255	siHNF4A	siNT	OK	2.50845	6.52212	1.37855	5.66085	5e-05	0.000661123
PDLIM2	chr8:22436253-22455538	siHNF4A	siNT	OK	16.3559	27.2045	0.734035	3.70868	5e-05	0.000661123
PEX5	chr12:7341758-7371169	siHNF4A	siNT	OK	11.9157	20.5236	0.78442	4.1413	5e-05	0.000661123
PFKP	chr10:3109711-3178997	siHNF4A	siNT	OK	70.5373	93.3104	0.403652	2.34179	5e-05	0.000661123
PHGR1	chr15:40643233-40648634	siHNF4A	siNT	OK	1217.2	1762.95	0.534428	3.13801	5e-05	0.000661123
PHLDA1	chr12:76419226-76425556	siHNF4A	siNT	OK	14.6933	21.4009	0.542508	3.05809	5e-05	0.000661123
PHLDA2	chr11:2949502-2950650	siHNF4A	siNT	OK	51.4062	83.3282	0.696863	3.70162	5e-05	0.000661123
PID1	chr2:229888688-230136057	siHNF4A	siNT	OK	3.4453	4.88584	0.503976	2.12409	0.00015	0.00173567
PIM1	chr6:37137921-37143204	siHNF4A	siNT	OK	13.9223	21.8502	0.650244	3.42495	5e-05	0.000661123
PLAC8	chr4:84011210-84035911	siHNF4A	siNT	OK	6.3343	9.49106	0.583384	2.44274	5e-05	0.000661123
PLEC	chr8:144989320-145050913	siHNF4A	siNT	OK	28.9745	41.0347	0.502057	2.95	5e-05	0.000661123
PLEKHG2	chr19:39903749-39919055	siHNF4A	siNT	OK	2.19056	3.34017	0.608622	2.89585	5e-05	0.000661123
PLK2	chr5:57749809-57755966	siHNF4A	siNT	OK	3.06265	4.66198	0.606162	2.55453	5e-05	0.000661123
PLS1	chr3:142315228-142432505	siHNF4A	siNT	OK	30.9364	41.8148	0.434709	2.47131	5e-05	0.000661123
PMAIP1	chr18:57567191-57571538	siHNF4A	siNT	OK	0.645012	1.1626	0.849962	2.04253	0.00075	0.00662281
PMEPA1	chr20:56223447-56286592	siHNF4A	siNT	OK	6.58384	12.5661	0.932538	4.84547	5e-05	0.000661123
PRDM1	chr6:106534194-106557814	siHNF4A	siNT	OK	0.494079	1.15131	1.22046	3.84861	5e-05	0.000661123
PRKCD	chr3:53195222-53226733	siHNF4A	siNT	OK	17.7699	23.4645	0.401041	2.14527	0.0002	0.00221459
PRNP	chr20:4666796-4682234	siHNF4A	siNT	OK	23.4109	49.8289	1.0898	6.00159	5e-05	0.000661123
PRSS12	chr4:119201192-119273922	siHNF4A	siNT	OK	17.0491	24.0429	0.495921	2.76833	5e-05	0.000661123
PRSS3	chr9:33750463-33799229	siHNF4A	siNT	OK	354.235	477.256	0.430057	2.50299	5e-05	0.000661123
PTPRH	chr19:55692614-55720874	siHNF4A	siNT	OK	13.0772	20.1431	0.623235	3.38217	5e-05	0.000661123
PVR	chr19:45147097-45169428	siHNF4A	siNT	OK	19.1199	29.8037	0.640414	2.98399	5e-05	0.000661123
RAB31	chr18:9708227-9862553	siHNF4A	siNT	OK	0.634646	1.06544	0.74742	2.32033	5e-05	0.000661123
RALA	chr7:39663151-39747723	siHNF4A	siNT	OK	24.1345	33.1071	0.456046	2.51711	5e-05	0.000661123
RAPH1	chr2:204298538-204400058	siHNF4A	siNT	OK	1.7698	2.47189	0.482025	1.79448	0.00255	0.0177823
RARA	chr17:38465422-38513895	siHNF4A	siNT	OK	6.68877	10.0447	0.586619	2.88935	5e-05	0.000661123
RASAL2	chr1:178060642-178448648	siHNF4A	siNT	OK	3.16589	4.19712	0.406792	2.10731	0.0002	0.00221459
RHOC	chr1:113243748-113250025	siHNF4A	siNT	OK	228.164	297.457	0.382607	2.24151	0.00015	0.00173567
RHOF	chr12:122150657-122231594	siHNF4A	siNT	OK	6.71208	12.9051	0.943106	3.78347	5e-05	0.000661123
RND1	chr12:49250915-49259653	siHNF4A	siNT	OK	11.7383	18.3792	0.646843	3.10882	5e-05	0.000661123
RND3	chr2:151324706-151344209	siHNF4A	siNT	OK	8.73439	11.9453	0.45167	2.23519	0.00015	0.00173567
RNF128	chrX:105937067-106040246	siHNF4A	siNT	OK	37.4373	50.1934	0.423023	2.39941	0.0001	0.00121867
RNF19B	chr1:33402049-33430286	siHNF4A	siNT	OK	7.33129	10.988	0.583787	2.80466	5e-05	0.000661123
S100A2	chr1:153533584-153538306	siHNF4A	siNT	OK	7.08272	11.3458	0.679782	2.63353	5e-05	0.000661123
SCOC	chr4:141178439-141303710	siHNF4A	siNT	OK	4.08525	5.95847	0.544515	2.18561	0.0001	0.00121867
SEMA3B	chr3:50305039-50314572	siHNF4A	siNT	OK	4.97072	8.27829	0.735878	3.42787	5e-05	0.000661123
SEMA3C	chr7:80371853-80548667	siHNF4A	siNT	OK	7.37894	9.92459	0.427594	2.24543	5e-05	0.000661123
SERPINE2	chr2:224839764-224904036	siHNF4A	siNT	OK	0.975799	4.61353	2.24122	7.14381	5e-05	0.000661123
SERTAD2	chr2:64858754-64881046	siHNF4A	siNT	OK	5.62335	9.36081	0.735205	3.81334	5e-05	0.000661123
SETD5	chr3:9439402-9519838	siHNF4A	siNT	OK	4.50642	6.86692	0.607682	3.13756	5e-05	0.000661123
SFXN3	chr10:102790995-102800998	siHNF4A	siNT	OK	5.80404	7.80118	0.426634	2.01666	0.00045	0.00433521
SH3D21	chr1:36771993-36786948	siHNF4A	siNT	OK	1.21646	2.80767	1.20668	3.98123	5e-05	0.000661123
SHF	chr15:45459411-45493373	siHNF4A	siNT	OK	1.06414	1.74607	0.714416	2.22828	0.00015	0.00173567
SHH	chr7:155595557-155604967	siHNF4A	siNT	OK	3.39075	4.99148	0.557862	2.06986	0.0006	0.00550262
SIPA1L3	chr19:38397867-38699008	siHNF4A	siNT	OK	16.5771	22.0109	0.409027	2.34341	5e-05	0.000661123
SLC15A1	chr13:99336054-99404929	siHNF4A	siNT	OK	9.03171	15.3465	0.764839	3.9173	5e-05	0.000661123
SLC22A18AS	chr11:2909326-2946476	siHNF4A	siNT	OK	2.63414	5.79716	1.13801	1.81802	0.00265	0.0182973
SLC22A3	chr6:160769404-160873611	siHNF4A	siNT	OK	3.89349	7.14235	0.875336	4.00085	5e-05	0.000661123
SLC25A19	chr17:73267379-73285530	siHNF4A	siNT	OK	20.0894	26.9991	0.426478	2.1285	0.00015	0.00173567
SLC25A24	chr1:108677343-108742980	siHNF4A	siNT	OK	12.3444	19.5855	0.665931	3.56228	5e-05	0.000661123
SLC25A43	chrX:118533257-118588437	siHNF4A	siNT	OK	5.39024	7.30882	0.439289	1.98897	0.0007	0.00626915
SLC6A8	chrX:152953751-152962048	siHNF4A	siNT	OK	15.2654	20.1079	0.397493	2.127	0.0003	0.00310369
SLC7A11	chr4:138948576-139163503	siHNF4A	siNT	OK	5.52303	8.32664	0.592274	3.21242	5e-05	0.000661123
SLC7A7	chr14:23242431-23289020	siHNF4A	siNT	OK	77.763	103.466	0.411995	2.3864	0.0001	0.00121867
SLC9A3	chr5:473333-524549	siHNF4A	siNT	OK	4.15864	12.7503	1.61635	7.49148	5e-05	0.000661123
SLCO2B1	chr11:74862031-74917445	siHNF4A	siNT	OK	15.9177	40.6793	1.35366	7.54497	5e-05	0.000661123
SMAD3	chr15:67358194-67487533	siHNF4A	siNT	OK	8.47179	11.1897	0.401434	2.17297	0.00015	0.00173567
SMAGP	chr12:51632507-51664202	siHNF4A	siNT	OK	70.7329	105.615	0.578368	1.9516	0.00095	0.0080504
SMOX	chr20:4129425-4168394	siHNF4A	siNT	OK	4.11464	5.91275	0.523065	2.18755	5e-05	0.000661123
SOGA2	chr18:8717368-8832775	siHNF4A	siNT	OK	11.438	18.2495	0.674024	3.74677	5e-05	0.000661123
SPATA2	chr20:48519928-48532080	siHNF4A	siNT	OK	5.90976	10.6161	0.845089	4.25952	5e-05	0.000661123
SPSB1	chr1:9352940-9429590	siHNF4A	siNT	OK	3.76106	9.67653	1.36335	6.27956	5e-05	0.000661123
SPTLC3	chr20:12989626-13147411	siHNF4A	siNT	OK	0.890162	1.58431	0.831712	2.84191	5e-05	0.000661123
ST3GAL1	chr8:134467090-134584183	siHNF4A	siNT	OK	41.6811	59.454	0.512381	3.00326	5e-05	0.000661123
STAMBPL1	chr10:90639943-90683259	siHNF4A	siNT	OK	6.35516	8.26814	0.379634	1.69723	0.00295	0.0199426
SULT2B1	chr19:49055428-49102684	siHNF4A	siNT	OK	40.7111	104.281	1.35698	7.37033	5e-05	0.000661123
SYBU	chr8:110586404-110704020	siHNF4A	siNT	OK	2.42801	3.28736	0.437152	1.69005	0.00315	0.0209906
TANC1	chr2:159825145-160089170	siHNF4A	siNT	OK	5.37728	7.90142	0.555236	2.97705	5e-05	0.000661123
TBC1D1	chr4:37892704-38140796	siHNF4A	siNT	OK	0.979625	1.67431	0.773262	2.98103	5e-05	0.000661123
TDRD7	chr9:100174301-100258405	siHNF4A	siNT	OK	6.20304	8.12539	0.389463	1.92224	0.00095	0.0080504
TGFBI	chr5:135364583-135399507	siHNF4A	siNT	OK	2.71972	4.51606	0.731605	3.01132	5e-05	0.000661123
TJP2	chr9:71736179-71870124	siHNF4A	siNT	OK	54.5746	82.287	0.592435	3.44825	5e-05	0.000661123
TM4SF5	chr17:4675186-4686506	siHNF4A	siNT	OK	17.9388	23.9434	0.416541	1.79073	0.002	0.0147812
TMEM45B	chr11:129685740-129729898	siHNF4A	siNT	OK	150.659	198.58	0.398439	2.34411	5e-05	0.000661123
TMEM74B	chr20:1161214-1165117	siHNF4A	siNT	OK	0.956947	1.7096	0.837147	2.21423	0.00045	0.00433521
TMEM92	chr17:48348766-48358846	siHNF4A	siNT	OK	6.08356	10.0282	0.721075	3.42139	5e-05	0.000661123
TNFAIP3	chr6:138144806-138204451	siHNF4A	siNT	OK	1.04378	1.62108	0.635134	2.37195	5e-05	0.000661123
TNFRSF11B	chr8:119935795-119964383	siHNF4A	siNT	OK	2.45821	5.64473	1.19929	4.75195	5e-05	0.000661123
TOB1	chr17:48939586-48945732	siHNF4A	siNT	OK	51.0528	69.1044	0.436787	2.44715	5e-05	0.000661123
TOE1	chr1:45794913-45956840	siHNF4A	siNT	OK	7.62449	10.8376	0.507338	1.78669	0.00255	0.0177823
TPM3	chr1:154127779-154164609	siHNF4A	siNT	OK	241.45	329.036	0.44652	2.62168	5e-05	0.000661123
TRAF5	chr1:211499956-211548286	siHNF4A	siNT	OK	1.75786	2.47458	0.493366	1.97322	0.0009	0.00770965
TRIB1	chr8:126442562-126450644	siHNF4A	siNT	OK	17.5064	23.64	0.433346	2.38295	5e-05	0.000661123
TRIM14	chr9:100818958-100881488	siHNF4A	siNT	OK	18.6721	32.1545	0.784138	2.56606	5e-05	0.000661123
TRIM15	chr6_ssto_hap7:1461434-1470925	siHNF4A	siNT	OK	1.22374	5.02717	2.03845	6.92028	5e-05	0.000661123
TRIM29	chr11:119981993-120008863	siHNF4A	siNT	OK	18.6924	28.5062	0.608828	3.32235	5e-05	0.000661123
TUBB6	chr18:12308256-12326568	siHNF4A	siNT	OK	2.73931	5.17888	0.918829	3.42656	5e-05	0.000661123
UACA	chr15:70946892-71055850	siHNF4A	siNT	OK	2.12494	3.02703	0.510479	2.36276	5e-05	0.000661123
UCHL5	chr1:192981495-193060906	siHNF4A	siNT	OK	19.3406	25.4019	0.393307	1.6167	0.00505	0.0303024
UCKL1	chr20:62571181-62601223	siHNF4A	siNT	OK	11.0735	16.9249	0.612036	1.74277	0.0026	0.0180411
UNC93A	chr6:167704802-167729502	siHNF4A	siNT	OK	0.390165	1.22137	1.64634	3.53932	5e-05	0.000661123
UPP1	chr7:48128354-48148330	siHNF4A	siNT	OK	7.12827	10.1133	0.504631	2.24682	0.00015	0.00173567
USH1C	chr11:17515441-17565963	siHNF4A	siNT	OK	17.7198	38.8209	1.13147	6.05378	5e-05	0.000661123
VASP	chr19:46010687-46030240	siHNF4A	siNT	OK	95.813	125.564	0.390133	2.26848	5e-05	0.000661123
VAV2	chr9:136627015-136857446	siHNF4A	siNT	OK	23.3299	31.1462	0.416873	2.37805	5e-05	0.000661123
VIL1	chr2:219283837-219314248	siHNF4A	siNT	OK	75.5162	125.169	0.729015	4.25133	5e-05	0.000661123
VRTN	chr14:74815165-74826711	siHNF4A	siNT	OK	0.369252	1.13419	1.61898	4.22666	5e-05	0.000661123
WSCD1	chr17:5973933-6027747	siHNF4A	siNT	OK	16.0905	21.229	0.399825	2.25759	5e-05	0.000661123
XXYLT1	chr3:194789012-194991895	siHNF4A	siNT	OK	5.81923	10.3958	0.837093	3.96966	5e-05	0.000661123
ZC4H2	chrX:64135681-64254624	siHNF4A	siNT	OK	2.19193	3.38248	0.625883	2.4449	5e-05	0.000661123
ZFP36	chr19:39897486-39900052	siHNF4A	siNT	OK	47.2686	68.5845	0.537	2.99827	5e-05	0.000661123
ZFYVE27	chr10:99496877-99520664	siHNF4A	siNT	OK	4.40955	6.25973	0.505471	2.21076	0.0002	0.00221459
ZNF488	chr10:48355088-48373866	siHNF4A	siNT	OK	2.84206	4.96551	0.805002	3.52146	5e-05	0.000661123
ZNF644	chr1:91380856-91487812	siHNF4A	siNT	OK	2.53073	3.36985	0.413129	1.81464	0.00155	0.0121389

## Sheet: S5B siHNF4A RNAseq +1.3x
gene	locus	sample_1	sample_2	status	value_1	value_2	log2(fold_change)	test_stat	p_value	q_value	Direct targets n=154 (+1.3x)
ACER2	chr9:19408924-19452500	siHNF4A	siNT	OK	7.4327	4.90718	-0.598993	-2.75355	5e-05	0.000661123
ACSS1	chr20:24986865-25038818	siHNF4A	siNT	OK	40.3351	25.0142	-0.68929	-3.89155	5e-05	0.000661123
ADCK3	chr1:227127937-227175246	siHNF4A	siNT	OK	78.0785	50.5425	-0.627429	-3.61643	5e-05	0.000661123
AGR3	chr7:16899029-16921613	siHNF4A	siNT	OK	19.5598	10.3317	-0.920817	-3.65261	5e-05	0.000661123
ALDH3B2	chr11:67429632-67448685	siHNF4A	siNT	OK	6.83521	4.25845	-0.682656	-2.98257	5e-05	0.000661123
ALKBH7	chr19:6372443-6375261	siHNF4A	siNT	OK	36.8919	27.8046	-0.407982	-2.11099	0.0001	0.00121867
AMN1	chr12:31824070-31882108	siHNF4A	siNT	OK	2.1076	1.27504	-0.725059	-2.25384	0.0001	0.00121867
ANKRD46	chr8:101521979-101572014	siHNF4A	siNT	OK	9.39647	7.073	-0.409796	-1.87415	0.0012	0.00985737
APCDD1	chr18:10454624-10488698	siHNF4A	siNT	OK	12.1446	4.77625	-1.34636	-6.22818	5e-05	0.000661123
APP	chr21:27252860-27543446	siHNF4A	siNT	OK	319.254	200.528	-0.670903	-3.94671	5e-05	0.000661123
ARHGEF28	chr5:72921982-73237818	siHNF4A	siNT	OK	4.31402	2.80195	-0.622602	-2.94726	5e-05	0.000661123
ARHGEF3	chr3:56761445-57113336	siHNF4A	siNT	OK	14.2201	10.5213	-0.434613	-2.2706	0.0001	0.00121867
ASAH1	chr8:17913924-17942507	siHNF4A	siNT	OK	68.5444	50.8223	-0.431579	-2.48062	5e-05	0.000661123
ATF7IP2	chr16:10479911-10577495	siHNF4A	siNT	OK	1.77074	1.14741	-0.625971	-2.18814	0.0003	0.00310369
ATG16L2	chr11:72525450-72540680	siHNF4A	siNT	OK	3.57906	2.57319	-0.476025	-1.78187	0.00245	0.0172761
B3GNT1	chr11:66112842-66115161	siHNF4A	siNT	OK	19.1279	11.5617	-0.726331	-3.62157	5e-05	0.000661123
BARX2	chr11:129245880-129322174	siHNF4A	siNT	OK	30.7233	20.4182	-0.589477	-3.07025	5e-05	0.000661123
BCKDHB	chr6:80816343-81055987	siHNF4A	siNT	OK	16.9422	12.8225	-0.401943	-1.81666	0.00175	0.0133002
BFSP1	chr20:17474549-17539605	siHNF4A	siNT	OK	2.42683	1.63522	-0.569593	-1.8816	0.0015	0.011843
BMF	chr15:40380090-40401085	siHNF4A	siNT	OK	13.1047	9.2313	-0.505473	-2.67429	5e-05	0.000661123
C11orf52	chr11:111783459-111797595	siHNF4A	siNT	OK	8.56297	6.44458	-0.410025	-1.57626	0.00685	0.038109
CA8	chr8:61101422-61193954	siHNF4A	siNT	OK	18.132	12.3896	-0.549404	-2.78702	5e-05	0.000661123
CBX7	chr22:39526778-39548538	siHNF4A	siNT	OK	6.77513	4.18317	-0.695653	-3.30968	5e-05	0.000661123
CELSR1	chr22:46756730-46933067	siHNF4A	siNT	OK	3.22915	2.45232	-0.397008	-2.01591	0.0003	0.00310369
CES3	chr16:66995131-67009052	siHNF4A	siNT	OK	2.47585	1.48679	-0.735718	-2.86785	5e-05	0.000661123
COL27A1	chr9:116918230-117072975	siHNF4A	siNT	OK	3.41957	2.60742	-0.391191	-1.7899	0.00195	0.0144882
COQ5	chr12:120941081-120966964	siHNF4A	siNT	OK	14.0898	10.2207	-0.463164	-2.12384	0.00025	0.00266293
CPD	chr17:28705941-28796675	siHNF4A	siNT	OK	56.3631	31.879	-0.822144	-4.80542	5e-05	0.000661123
CRY2	chr11:45868668-45904799	siHNF4A	siNT	OK	13.8197	10.4618	-0.401593	-2.14742	0.0002	0.00221459
CRYZ	chr1:75171171-75232360	siHNF4A	siNT	OK	15.8768	11.8904	-0.417125	-1.71652	0.00285	0.0194334
CSGALNACT1	chr8:19261671-19540261	siHNF4A	siNT	OK	1.60415	1.13528	-0.498771	-1.78573	0.00215	0.0155256
CTSH	chr15:79214091-79237420	siHNF4A	siNT	OK	208.023	127.915	-0.70155	-4.07693	5e-05	0.000661123
CUX1	chr7:101459183-101927250	siHNF4A	siNT	OK	34.444	24.6125	-0.484862	-2.28051	5e-05	0.000661123
DAPK2	chr15:64199234-64338521	siHNF4A	siNT	OK	1.72329	1.13958	-0.596667	-1.8987	0.00145	0.0115205
DEPTOR	chr8:120885899-121063157	siHNF4A	siNT	OK	9.76258	6.72823	-0.537035	-2.55333	5e-05	0.000661123
DHRS12	chr13:52342128-52378298	siHNF4A	siNT	OK	8.64255	5.63744	-0.616416	-2.41449	5e-05	0.000661123
EGFL7	chr9:139553307-139567130	siHNF4A	siNT	OK	160.151	110.812	-0.531315	-3.04648	5e-05	0.000661123
ERGIC1	chr5:172261222-172379688	siHNF4A	siNT	OK	172.518	102.567	-0.750185	-4.41233	5e-05	0.000661123
ERGIC3	chr20:34129777-34145405	siHNF4A	siNT	OK	262.653	181.482	-0.533329	-3.11151	5e-05	0.000661123
ETFB	chr19:51848408-51869672	siHNF4A	siNT	OK	1049.83	774.193	-0.439396	-2.57021	5e-05	0.000661123
F5	chr1:169481191-169555769	siHNF4A	siNT	OK	27.8041	17.2967	-0.684802	-3.96116	5e-05	0.000661123
FABP5	chr8:82192717-82197012	siHNF4A	siNT	OK	58.7032	41.4004	-0.503794	-2.50613	5e-05	0.000661123
FAM174B	chr15:93160678-93199031	siHNF4A	siNT	OK	21.7723	16.6532	-0.386688	-2.04967	0.00045	0.00433521
FAM3D	chr3:58619669-58652561	siHNF4A	siNT	OK	13.1863	9.65372	-0.449886	-1.98292	0.00095	0.0080504
FAM46C	chr1:118148603-118171011	siHNF4A	siNT	OK	8.41616	4.06992	-1.04816	-5.29757	5e-05	0.000661123
FAM83E	chr19:49103856-49116694	siHNF4A	siNT	OK	9.92724	7.50045	-0.404414	-1.84534	0.00165	0.0127478
FDFT1	chr8:11660189-11696818	siHNF4A	siNT	OK	170.339	120.484	-0.499569	-2.92051	5e-05	0.000661123
FIBCD1	chr9:133777824-133814455	siHNF4A	siNT	OK	32.3224	22.4706	-0.524494	-2.91312	5e-05	0.000661123
FKBP10	chr17:39968961-39979469	siHNF4A	siNT	OK	167.746	105.65	-0.666986	-3.91688	5e-05	0.000661123
FLJ23867	chr1:180123967-180169859	siHNF4A	siNT	OK	70.3632	44.5864	-0.658216	-1.54531	0.00765	0.0414792
FOXN3	chr14:89622515-90085494	siHNF4A	siNT	OK	8.38903	6.23839	-0.427331	-2.27431	0.0001	0.00121867
GALNT7	chr4:174089903-174245118	siHNF4A	siNT	OK	38.402	23.3672	-0.716694	-4.07983	5e-05	0.000661123
GATS	chr7:99775537-99869855	siHNF4A	siNT	OK	6.67631	4.36743	-0.612266	-2.80455	5e-05	0.000661123
GATSL3	chr22:30681106-30685616	siHNF4A	siNT	OK	11.2957	5.5824	-1.01682	-4.38163	5e-05	0.000661123
GGT1	chr22:24979717-25024972	siHNF4A	siNT	OK	52.8317	39.9173	-0.404388	-2.20887	5e-05	0.000661123
GOLM1	chr9:88641057-88715116	siHNF4A	siNT	OK	120.395	82.6284	-0.543067	-3.18437	5e-05	0.000661123
GPR116	chr6:46820241-46922675	siHNF4A	siNT	OK	1.85506	1.15001	-0.689818	-2.76641	5e-05	0.000661123
GSDMB	chr17:38060847-38074903	siHNF4A	siNT	OK	19.2995	14.0662	-0.456331	-2.21729	0.00015	0.00173567
GSN	chr9:124030379-124095120	siHNF4A	siNT	OK	71.1405	48.8126	-0.543417	-3.11521	5e-05	0.000661123
HADHB	chr2:26467615-26513333	siHNF4A	siNT	OK	56.9557	42.0704	-0.437035	-2.46035	5e-05	0.000661123
HBP1	chr7:106809405-107218968	siHNF4A	siNT	OK	18.0483	12.5663	-0.522307	-1.85464	0.00095	0.0080504
HEXIM2	chr17:43238263-43247406	siHNF4A	siNT	OK	3.22152	2.23793	-0.525576	-1.6292	0.00665	0.037243
HMGCS2	chr1:120290618-120311555	siHNF4A	siNT	OK	86.549	58.2038	-0.572402	-3.29075	5e-05	0.000661123
HNF1B	chr17:36046433-36105096	siHNF4A	siNT	OK	12.9058	9.4828	-0.444633	-2.21494	0.0002	0.00221459
IDH1	chr2:209100952-209119806	siHNF4A	siNT	OK	195.387	125.028	-0.644087	-3.78291	5e-05	0.000661123
IFT27	chr22:37154245-37172177	siHNF4A	siNT	OK	18.0803	13.4473	-0.427099	-1.92422	0.0008	0.00697633
IGFL2	chr19:46651038-46664561	siHNF4A	siNT	OK	115.402	81.3387	-0.504657	-2.61747	5e-05	0.000661123
IL1R1	chr2:102770401-102796334	siHNF4A	siNT	OK	6.05209	4.27838	-0.500368	-2.44882	5e-05	0.000661123
IRX4	chr5:1877540-1882880	siHNF4A	siNT	OK	3.89425	2.54822	-0.611855	-2.33244	0.0001	0.00121867
ITFG3	chr16:284800-316119	siHNF4A	siNT	OK	35.3525	25.4702	-0.473003	-2.6299	5e-05	0.000661123
ITGA6	chr2:173292313-173371181	siHNF4A	siNT	OK	193.643	142.288	-0.444583	-2.59547	5e-05	0.000661123
KCNQ1	chr11:2466220-2870340	siHNF4A	siNT	OK	37.7502	26.8101	-0.493707	-2.75994	5e-05	0.000661123
KIAA0195	chr17:73452663-73511627	siHNF4A	siNT	OK	10.2631	6.1589	-0.736723	-2.92373	5e-05	0.000661123
KIF12	chr9:116853917-116861337	siHNF4A	siNT	OK	18.7203	12.8026	-0.548163	-2.7398	5e-05	0.000661123
KLHL24	chr3:183353410-183402304	siHNF4A	siNT	OK	1.92401	1.107	-0.797453	-3.35764	5e-05	0.000661123
LAMC1	chr1:182992594-183114727	siHNF4A	siNT	OK	97.8706	70.0197	-0.483114	-2.85677	5e-05	0.000661123
LGMN	chr14:93170151-93215047	siHNF4A	siNT	OK	152.748	105.86	-0.528993	-3.08773	5e-05	0.000661123
LHPP	chr10:126150340-126302710	siHNF4A	siNT	OK	9.12973	6.26672	-0.542862	-2.33415	0.0002	0.00221459
LINC00239	chr14:102196773-102198862	siHNF4A	siNT	OK	2.52755	1.16814	-1.11353	-2.02544	0.00175	0.0133002
LINC00675	chr17:10616638-10718481	siHNF4A	siNT	OK	4.18606	2.57467	-0.701206	-2.32636	0.0002	0.00221459
LOXL1	chr15:74209808-74244478	siHNF4A	siNT	OK	19.8314	14.5522	-0.446553	-2.03296	0.00055	0.00511103
LYPD6	chr2:150186498-150330659	siHNF4A	siNT	OK	1.7516	1.2174	-0.524877	-1.94036	0.00075	0.00662281
LYZ	chr12:69742133-69748013	siHNF4A	siNT	OK	3036.78	1763.26	-0.784298	-4.44166	5e-05	0.000661123
MCF2L	chr13:113623534-113754053	siHNF4A	siNT	OK	8.37275	5.93777	-0.49578	-2.59615	5e-05	0.000661123
MTMR12	chr5:32227110-32313114	siHNF4A	siNT	OK	11.6619	8.3985	-0.473598	-2.52665	5e-05	0.000661123
NAGLU	chr17:40687950-40696466	siHNF4A	siNT	OK	29.2467	18.6423	-0.64969	-3.52281	5e-05	0.000661123
NCOA3	chr20:46130600-46285621	siHNF4A	siNT	OK	10.8248	8.13681	-0.4118	-2.26094	0.0001	0.00121867
NDRG1	chr8:134249413-134309547	siHNF4A	siNT	OK	52.6597	31.6063	-0.736489	-4.17982	5e-05	0.000661123
NLK	chr17:26369687-26523404	siHNF4A	siNT	OK	7.21819	5.41082	-0.415789	-1.99179	0.00055	0.00511103
NRCAM	chr7:107788070-108096841	siHNF4A	siNT	OK	25.9299	19.4331	-0.4161	-2.35931	5e-05	0.000661123
OAT	chr10:126085871-126107545	siHNF4A	siNT	OK	21.934	16.0236	-0.452966	-2.33455	5e-05	0.000661123
ORAI3	chr16:30960404-30966259	siHNF4A	siNT	OK	4.12879	2.64187	-0.644161	-2.47593	5e-05	0.000661123
PBX1	chr1:164528596-164821060	siHNF4A	siNT	OK	1.75953	1.12604	-0.64393	-2.66722	5e-05	0.000661123
PCMTD1	chr8:52730139-52811735	siHNF4A	siNT	OK	2.97135	2.27845	-0.383063	-1.62212	0.00495	0.0298159
PEBP1	chr12:118573869-118583390	siHNF4A	siNT	OK	139.434	106.217	-0.392565	-2.26017	5e-05	0.000661123
PGAP3	chr17:37827374-37844310	siHNF4A	siNT	OK	1028.78	689.372	-0.577577	-3.326	5e-05	0.000661123
PGC	chr6:41704448-41715139	siHNF4A	siNT	OK	51.1764	23.5179	-1.12172	-5.85527	5e-05	0.000661123
PINK1	chr1:20959947-20978004	siHNF4A	siNT	OK	18.3607	12.8475	-0.515135	-2.67215	5e-05	0.000661123
PLA2G4A	chr1:186798031-186958113	siHNF4A	siNT	OK	22.9667	16.6314	-0.465637	-2.49428	5e-05	0.000661123
PLCB4	chr20:9049700-9461462	siHNF4A	siNT	OK	5.65351	3.89061	-0.539151	-2.63408	5e-05	0.000661123
PLD1	chr3:171318194-171528284	siHNF4A	siNT	OK	4.03572	2.83143	-0.511292	-2.40808	5e-05	0.000661123
PLEKHB1	chr11:73357222-73373864	siHNF4A	siNT	OK	54.6656	27.6165	-0.985101	-5.4074	5e-05	0.000661123
PMM1	chr22:41972889-41985871	siHNF4A	siNT	OK	81.2921	44.2577	-0.877186	-4.79093	5e-05	0.000661123
PRSS8	chr16:31142753-31147151	siHNF4A	siNT	OK	147.128	111.688	-0.397601	-2.30989	5e-05	0.000661123
PTPRJ	chr11:48002109-48192394	siHNF4A	siNT	OK	19.9729	14.3352	-0.478486	-2.71645	5e-05	0.000661123
RAB37	chr17:72667255-72743474	siHNF4A	siNT	OK	21.0866	13.5053	-0.642803	-3.25607	5e-05	0.000661123
RAB3B	chr1:52373627-52456436	siHNF4A	siNT	OK	3.62969	2.62112	-0.469659	-2.4404	5e-05	0.000661123
RAB40B	chr17:80614942-80656598	siHNF4A	siNT	OK	47.0404	34.3401	-0.454005	-2.47364	5e-05	0.000661123
RALYL	chr8:85095452-85834078	siHNF4A	siNT	OK	16.4518	11.6116	-0.502683	-2.46234	5e-05	0.000661123
RAMP1	chr2:238768186-238820755	siHNF4A	siNT	OK	3.74651	2.18327	-0.779053	-2.12171	0.00035	0.00354815
RASSF10	chr11:13030969-13033653	siHNF4A	siNT	OK	7.05269	4.84378	-0.54204	-2.44269	5e-05	0.000661123
RCN3	chr19:50030874-50046890	siHNF4A	siNT	OK	17.8929	11.5065	-0.636941	-3.10891	5e-05	0.000661123
REG4	chr1:120336640-120354203	siHNF4A	siNT	OK	2138.62	1594.79	-0.423311	-2.43453	5e-05	0.000661123
RPS6KA2	chr6:166822853-167275771	siHNF4A	siNT	OK	5.13004	3.72904	-0.460167	-2.26484	5e-05	0.000661123
SCD	chr10:102106771-102124588	siHNF4A	siNT	OK	25.3454	15.7147	-0.689604	-3.89347	5e-05	0.000661123
SCNN1A	chr12:6456008-6500737	siHNF4A	siNT	OK	70.1895	39.1083	-0.843781	-3.25599	5e-05	0.000661123
SEL1L3	chr4:25749048-25864610	siHNF4A	siNT	OK	81.1957	60.2059	-0.431499	-2.53182	5e-05	0.000661123
SGSM2	chr17:2240805-2284348	siHNF4A	siNT	OK	5.20456	3.73192	-0.47986	-2.28196	0.00015	0.00173567
SH3PXD2A	chr10:105353783-105615164	siHNF4A	siNT	OK	4.49481	3.12084	-0.526327	-2.73468	5e-05	0.000661123
SHISA2	chr13:26618734-26625198	siHNF4A	siNT	OK	4.42153	2.00811	-1.13871	-4.52298	5e-05	0.000661123
SHISA6	chr17:11144739-11467380	siHNF4A	siNT	OK	13.6234	9.80742	-0.474144	-2.63649	5e-05	0.000661123
SLC39A11	chr17:70642084-71088853	siHNF4A	siNT	OK	28.2733	18.5492	-0.608085	-3.28757	5e-05	0.000661123
SLC40A1	chr2:190425315-190445537	siHNF4A	siNT	OK	193.441	114.563	-0.755756	-4.45549	5e-05	0.000661123
SLC5A1	chr22:32439018-32509011	siHNF4A	siNT	OK	25.0146	15.7603	-0.666474	-3.73789	5e-05	0.000661123
SLC9A4	chr2:103089761-103150431	siHNF4A	siNT	OK	3.01002	2.07874	-0.53406	-2.2439	5e-05	0.000661123
SMARCA1	chrX:128580477-128657460	siHNF4A	siNT	OK	3.53389	2.50939	-0.493922	-2.14895	0.0004	0.00394706
SMIM14	chr4:39529458-39640481	siHNF4A	siNT	OK	26.9776	20.7269	-0.380258	-1.94605	0.00065	0.00587143
SMPD1	chr11:6411643-6416228	siHNF4A	siNT	OK	28.015	18.7867	-0.576492	-3.1003	5e-05	0.000661123
SMTNL2	chr17:4487275-4511614	siHNF4A	siNT	OK	2.25731	1.03522	-1.12466	-3.27444	5e-05	0.000661123
SORL1	chr11:121322911-121504471	siHNF4A	siNT	OK	63.4075	47.7674	-0.408627	-2.4165	5e-05	0.000661123
SPATA20	chr17:48624449-48633213	siHNF4A	siNT	OK	26.3128	17.7466	-0.568218	-3.04762	5e-05	0.000661123
SPTSSB	chr3:161062579-161089871	siHNF4A	siNT	OK	10.2078	7.77019	-0.393651	-1.8566	0.0012	0.00985737
SREBF2	chr22:42229105-42302375	siHNF4A	siNT	OK	95.0851	65.3432	-0.541182	-3.17695	5e-05	0.000661123
ST13P4	chr13:50746153-50747751	siHNF4A	siNT	OK	7.88671	5.85227	-0.430428	-1.79827	0.00175	0.0133002
ST6GALNAC1	chr17:74620844-74639894	siHNF4A	siNT	OK	62.5143	39.7263	-0.654092	-3.71757	5e-05	0.000661123
STK38L	chr12:27397077-27478890	siHNF4A	siNT	OK	9.95188	7.19005	-0.468967	-2.44786	5e-05	0.000661123
SUCLG2	chr3:67410883-67705038	siHNF4A	siNT	OK	83.9161	62.883	-0.416277	-2.3206	5e-05	0.000661123
SUSD1	chr9:114758831-115112545	siHNF4A	siNT	OK	32.94	20.7	-0.670208	-1.62786	0.0082	0.0438947
TARBP1	chr1:234527058-234614849	siHNF4A	siNT	OK	6.49516	4.95689	-0.389928	-1.94814	0.00055	0.00511103
TBC1D8B	chrX:106045918-106119377	siHNF4A	siNT	OK	3.58573	2.43313	-0.559455	-1.99374	0.0005	0.00472301
TERF1	chr8:73921096-73959987	siHNF4A	siNT	OK	27.631	17.5457	-0.65517	-3.54118	5e-05	0.000661123
TMC5	chr16:19422056-19510434	siHNF4A	siNT	OK	20.5393	14.4579	-0.506532	-2.79824	5e-05	0.000661123
TMEM135	chr11:86748885-87039876	siHNF4A	siNT	OK	4.58745	2.93524	-0.644215	-3.24133	5e-05	0.000661123
TMEM143	chr19:48835615-48867186	siHNF4A	siNT	OK	9.03629	5.97704	-0.596299	-2.70987	5e-05	0.000661123
TMEM205	chr19:11453451-11456981	siHNF4A	siNT	OK	112.01	82.7648	-0.436541	-2.34483	5e-05	0.000661123
TMEM254	chr10:81805988-81852307	siHNF4A	siNT	OK	6.65117	4.09437	-0.699967	-2.87478	5e-05	0.000661123
TOM1	chr22:35695267-35743987	siHNF4A	siNT	OK	15.3839	11.4122	-0.430843	-2.16076	0.0001	0.00121867
TRNP1	chr1:27320194-27327377	siHNF4A	siNT	OK	169.073	116.881	-0.532597	-3.10675	5e-05	0.000661123
TTC39A	chr1:51752929-51810785	siHNF4A	siNT	OK	17.3269	13.2045	-0.391988	-2.03727	0.00035	0.00354815
WDFY2	chr13:52158483-52336171	siHNF4A	siNT	OK	3.43459	2.58408	-0.410489	-1.74871	0.00245	0.0172761
WEE1	chr11:9595227-9611313	siHNF4A	siNT	OK	16.7634	11.719	-0.516465	-2.7261	5e-05	0.000661123
XBP1	chr22:29190547-29196560	siHNF4A	siNT	OK	431.053	321.875	-0.421365	-2.49059	5e-05	0.000661123
YPEL2	chr17:57409052-57479095	siHNF4A	siNT	OK	4.83167	2.53494	-0.930572	-4.32409	5e-05	0.000661123
ZDHHC7	chr16:85008066-85045141	siHNF4A	siNT	OK	36.1938	25.5723	-0.50116	-2.79496	5e-05	0.000661123

## Sheet: S5C siGATA6 RNAseq -1.3x
gene	locus	sample_1	sample_2	status	value_1	value_2	log2(fold_change)	test_stat	p_value	q_value	Direct -1.3x (n=795)
ABCB6	chr2:220074487-220083712	siGATA6	siNT	OK	24.1584	38.2487	0.662888	2.98478	5e-05	0.000731486
ABCC2	chr10:101542462-101611662	siGATA6	siNT	OK	12.7554	20.1513	0.659762	2.94199	5e-05	0.000731486
ABCC4	chr13:95672082-95953687	siGATA6	siNT	OK	10.4983	14.4767	0.463577	1.98537	0.0004	0.00473235
ABCD3	chr1:94883932-94984219	siGATA6	siNT	OK	15.1698	20.2339	0.415572	1.71836	0.003	0.0244761
ABCG1	chr21:43619798-43717354	siGATA6	siNT	OK	2.35316	5.23517	1.15363	3.69554	5e-05	0.000731486
ABCG2	chr4:89011415-89152474	siGATA6	siNT	OK	5.04055	25.6195	2.34559	9.59792	5e-05	0.000731486
ABHD3	chr18:19230857-19284766	siGATA6	siNT	OK	11.5891	16.0431	0.469181	1.78156	0.0021	0.0182128
ABHD4	chr14:23067146-23081265	siGATA6	siNT	OK	37.5444	50.3692	0.423945	1.9363	0.00065	0.00705738
ABHD6	chr3:58223258-58280461	siGATA6	siNT	OK	5.9372	12.4274	1.06567	3.86342	5e-05	0.000731486
ABLIM3	chr5:148521053-148639999	siGATA6	siNT	OK	3.0981	4.9569	0.678055	2.40107	5e-05	0.000731486
ABO	chr9:136130562-136150630	siGATA6	siNT	OK	23.4276	37.8252	0.691137	2.81749	5e-05	0.000731486
ACAT1	chr11:107992257-108018891	siGATA6	siNT	OK	20.815	27.7246	0.413542	1.73002	0.0029	0.0237511
ACE	chr17:61554421-61575741	siGATA6	siNT	OK	3.71164	5.20047	0.486583	1.79515	0.00185	0.0165723
ACER2	chr9:19408924-19452500	siGATA6	siNT	OK	1.9161	5.15129	1.42676	4.41645	5e-05	0.000731486
ACER3	chr11:76571916-76734850	siGATA6	siNT	OK	5.56398	7.84203	0.49511	1.90909	0.00085	0.00872562
ACOT11	chr1:55013806-55100417	siGATA6	siNT	OK	18.0236	23.8429	0.403674	1.74756	0.0023	0.0196807
ACOX1	chr17:73937588-74002080	siGATA6	siNT	OK	7.728	10.9236	0.499288	1.92835	0.0007	0.00747348
ACSS1	chr20:24986865-25038818	siGATA6	siNT	OK	7.88934	26.2511	1.7344	7.24079	5e-05	0.000731486
ACSS2	chr20:33462765-33515769	siGATA6	siNT	OK	12.5672	17.831	0.504724	2.09158	0.0003	0.00369971
ACY3	chr11:67410025-67418130	siGATA6	siNT	OK	6.27367	10.8726	0.793315	2.53546	5e-05	0.000731486
ADAM10	chr15:58888509-59042177	siGATA6	siNT	OK	9.14876	13.0576	0.51324	2.09603	0.00035	0.00425081
ADAM28	chr8:24151579-24212726	siGATA6	siNT	OK	1.439	3.69109	1.35898	4.04675	5e-05	0.000731486
ADAM8	chr10:135075919-135090407	siGATA6	siNT	OK	3.24007	5.65079	0.802429	2.73721	5e-05	0.000731486
ADAM9	chr8:38854504-38962779	siGATA6	siNT	OK	56.9864	95.0231	0.73766	3.66507	5e-05	0.000731486
ADAMTS9	chr3:64501330-64997143	siGATA6	siNT	OK	0.33494	1.04028	1.63499	4.32326	5e-05	0.000731486
ADCK3	chr1:227127937-227175246	siGATA6	siNT	OK	37.7072	53.0435	0.492338	2.29635	5e-05	0.000731486
ADCY1	chr7:45614124-45762714	siGATA6	siNT	OK	0.557782	1.34203	1.26664	4.14079	5e-05	0.000731486
ADD3	chr10:111705316-111895323	siGATA6	siNT	OK	17.2984	36.2384	1.06689	4.91415	5e-05	0.000731486
ADORA2A	chr22:24823529-24890783	siGATA6	siNT	OK	1.0911	5.276	2.27367	6.31367	5e-05	0.000731486
ADORA2B	chr17:15848230-15879210	siGATA6	siNT	OK	30.5573	50.3602	0.720768	3.15145	5e-05	0.000731486
AES	chr19:3052907-3062964	siGATA6	siNT	OK	96.5613	125.95	0.38333	1.83387	0.002	0.0175959
AGFG2	chr7:100136833-100165843	siGATA6	siNT	OK	16.8735	24.8867	0.560611	2.5409	5e-05	0.000731486
AGR2	chr7:16832263-16844738	siGATA6	siNT	OK	3899.87	9417.1	1.27186	6.50516	5e-05	0.000731486
AGR3	chr7:16899029-16921613	siGATA6	siNT	OK	5.84094	10.8511	0.893567	2.40262	5e-05	0.000731486
AGRN	chr1:955502-991499	siGATA6	siNT	OK	51.8708	72.0446	0.473969	2.40668	5e-05	0.000731486
AHR	chr7:17338275-17385775	siGATA6	siNT	OK	21.958	35.3999	0.688997	3.28576	5e-05	0.000731486
AK5	chr1:77747661-78025654	siGATA6	siNT	OK	1.40689	3.33417	1.24482	3.69019	5e-05	0.000731486
AKAP13	chr15:85923846-86292589	siGATA6	siNT	OK	6.44288	9.05287	0.49067	2.17517	0.0002	0.00257825
AKR1A1	chr1:46016454-46035723	siGATA6	siNT	OK	45.7925	61.8041	0.432593	1.8744	0.00125	0.0120673
AKR1B1	chr7:134127106-134143888	siGATA6	siNT	OK	6.12764	10.8634	0.826075	2.67345	5e-05	0.000731486
AKR1B10	chr7:134212343-134226166	siGATA6	siNT	OK	901.016	2258.73	1.32589	6.91373	5e-05	0.000731486
AKR1C2	chr10:5029967-5060225	siGATA6	siNT	OK	220.494	292.883	0.409586	2.08748	0.00025	0.00313443
ALAS1	chr3:52232098-52248343	siGATA6	siNT	OK	48.7741	63.43	0.379048	1.78069	0.00145	0.0135981
ALDH1A1	chr9:75515577-75568233	siGATA6	siNT	OK	1.25447	2.27132	0.856457	2.23721	0.00045	0.00522253
ALDH1A2	chr15:58245621-58358121	siGATA6	siNT	OK	3.18057	9.19243	1.53116	5.4504	5e-05	0.000731486
ALDH1A3	chr15:101420008-101456830	siGATA6	siNT	OK	8.48452	16.0719	0.921639	3.7326	5e-05	0.000731486
ALDH2	chr12:112204690-112247789	siGATA6	siNT	OK	81.1586	134.785	0.731845	3.54602	5e-05	0.000731486
ALDH3A1	chr17:19641297-19651746	siGATA6	siNT	OK	3014.35	4742.82	0.6539	3.32412	5e-05	0.000731486
ALDH3A2	chr17:19552063-19580908	siGATA6	siNT	OK	78.8599	103.559	0.393094	1.96771	0.0011	0.01084
AMN	chr14:103388992-103397179	siGATA6	siNT	OK	1.9644	3.33809	0.764934	1.98602	0.00095	0.00956802
ANKMY2	chr7:16639400-16685442	siGATA6	siNT	OK	14.4449	19.5335	0.435389	1.77506	0.0023	0.0196807
ANKRD29	chr18:21179977-21242849	siGATA6	siNT	OK	2.74926	5.85908	1.09163	3.41694	5e-05	0.000731486
ANKRD46	chr8:101521979-101572014	siGATA6	siNT	OK	4.59482	7.42462	0.692308	2.28146	0.00015	0.001996
ANO1	chr11:69924407-70035652	siGATA6	siNT	OK	42.1218	59.5233	0.498888	2.42487	5e-05	0.000731486
ANO5	chr11:22214721-22304913	siGATA6	siNT	OK	0.656708	1.14259	0.798988	2.28323	0.0001	0.00138839
ANTXR2	chr4:80822770-80994477	siGATA6	siNT	OK	4.0814	6.74646	0.725068	1.90254	0.001	0.00995412
ANXA10	chr4:169013687-169108893	siGATA6	siNT	OK	75.852	270.108	1.83228	8.72666	5e-05	0.000731486
ANXA13	chr8:124693033-124749647	siGATA6	siNT	OK	0.359216	1.13619	1.66128	2.56515	5e-05	0.000731486
ANXA5	chr4:122589151-122618147	siGATA6	siNT	OK	164.753	297.998	0.854997	4.26047	5e-05	0.000731486
AP1AR	chr4:113152894-113191211	siGATA6	siNT	OK	10.4962	14.3837	0.45457	1.81577	0.00175	0.0158204
AP1S3	chr2:224620046-224702319	siGATA6	siNT	OK	3.54712	6.15722	0.795632	2.85726	5e-05	0.000731486
APBB1IP	chr10:26727265-26856732	siGATA6	siNT	OK	2.67734	8.21849	1.61807	5.33133	5e-05	0.000731486
APEH	chr3:49711434-49720934	siGATA6	siNT	OK	46.6122	62.4896	0.422908	1.9934	0.0004	0.00473235
APOBEC1	chr12:7801995-7818502	siGATA6	siNT	OK	5.13141	9.30418	0.858522	2.40148	0.0001	0.00138839
APOD	chr3:195295572-195311076	siGATA6	siNT	OK	2.86086	6.04116	1.07838	2.83945	5e-05	0.000731486
ARFGAP3	chr22:43192531-43253408	siGATA6	siNT	OK	7.32962	9.83826	0.424666	1.58577	0.0059	0.0419355
ARID3A	chr19:926036-972803	siGATA6	siNT	OK	3.02194	4.22694	0.484141	1.55269	0.00655	0.0456681
ARID5B	chr10:63661012-63856707	siGATA6	siNT	OK	3.84207	5.35943	0.480194	1.91735	0.00075	0.00792795
ARL4C	chr2:235401685-235405693	siGATA6	siNT	OK	8.96245	13.462	0.58693	2.40329	5e-05	0.000731486
ARPC1B	chr7:98972297-99006305	siGATA6	siNT	OK	95.4242	132.797	0.476796	1.5438	0.0068	0.0470523
ARPC2	chr2:219081873-219119071	siGATA6	siNT	OK	181.967	265.364	0.544293	2.70334	5e-05	0.000731486
ARRB1	chr11:74971165-75062875	siGATA6	siNT	OK	22.8069	31.7497	0.477273	2.31268	5e-05	0.000731486
ARRB2	chr17:4613788-4624795	siGATA6	siNT	OK	21.1858	31.2784	0.562073	2.32289	5e-05	0.000731486
ASAP2	chr2:9346893-9545812	siGATA6	siNT	OK	15.4269	20.3751	0.401363	1.82202	0.00215	0.0185584
ASCC3	chr6:100956607-101329224	siGATA6	siNT	OK	8.70193	11.9897	0.462394	1.99432	0.0003	0.00369971
ASPH	chr8:62200524-62627199	siGATA6	siNT	OK	126.354	168.419	0.41458	2.08067	0.00035	0.00425081
ASPHD2	chr22:26825279-26840978	siGATA6	siNT	OK	3.2298	4.91587	0.606004	2.05341	0.0007	0.00747348
ASS1	chr9:133320093-133376661	siGATA6	siNT	OK	157.801	280.441	0.829588	4.17675	5e-05	0.000731486
ATF7IP2	chr16:10479911-10577495	siGATA6	siNT	OK	0.643518	1.20465	0.90456	2.23872	0.0001	0.00138839
ATP11A	chr13:113344642-113541482	siGATA6	siNT	OK	14.4168	22.9417	0.670223	3.21989	5e-05	0.000731486
ATP11B	chr3:182511290-182639421	siGATA6	siNT	OK	4.39184	8.34564	0.926197	3.76605	5e-05	0.000731486
ATP13A1	chr19:19756009-19774503	siGATA6	siNT	OK	22.7968	32.9542	0.53163	2.43062	5e-05	0.000731486
ATP13A3	chr3:194123402-194188968	siGATA6	siNT	OK	11.6985	15.3235	0.389415	1.74822	0.00225	0.0193174
ATP1A1	chr1:116915794-116961244	siGATA6	siNT	OK	297.911	407.073	0.450408	2.36449	5e-05	0.000731486
ATP1B1	chr1:169075946-169337186	siGATA6	siNT	OK	206.568	415.28	1.00747	5.10572	5e-05	0.000731486
ATP1B3	chr3:141595469-141645382	siGATA6	siNT	OK	61.5389	129.817	1.07691	5.09609	5e-05	0.000731486
ATP2B1	chr12:89981825-90049844	siGATA6	siNT	OK	6.19913	9.2787	0.581857	2.44206	5e-05	0.000731486
ATP7A	chrX:77166193-77305892	siGATA6	siNT	OK	3.14744	4.47778	0.508603	1.93116	0.00085	0.00872562
ATP7B	chr13:52506805-52585630	siGATA6	siNT	OK	2.27422	3.24681	0.513655	1.84447	0.00115	0.0112204
B3GNT1	chr11:66112842-66115161	siGATA6	siNT	OK	6.87618	12.1323	0.819169	2.93223	5e-05	0.000731486
B4GALNT3	chr12:569542-671058	siGATA6	siNT	OK	7.93767	12.8968	0.700227	2.77438	5e-05	0.000731486
B4GALT4	chr3:118930588-118959752	siGATA6	siNT	OK	14.2414	20.1009	0.497166	2.02687	0.00075	0.00792795
BACE2	chr21:42539727-42648524	siGATA6	siNT	OK	124.442	163.78	0.396283	2.00789	0.00035	0.00425081
BARX2	chr11:129245880-129322174	siGATA6	siNT	OK	13.8365	21.4317	0.631268	2.44014	5e-05	0.000731486
BCKDHB	chr6:80816343-81055987	siGATA6	siNT	OK	6.88264	13.4602	0.967663	3.17736	5e-05	0.000731486
BCL3	chr19:45251977-45263301	siGATA6	siNT	OK	14.6355	24.5437	0.745887	2.93545	5e-05	0.000731486
BDKRB2	chr14:96671134-96710666	siGATA6	siNT	OK	5.29156	7.96086	0.589232	2.25124	0.0002	0.00257825
BHLHA15	chr7:97841565-97842271	siGATA6	siNT	OK	9.99034	16.6113	0.733556	2.21776	0.00015	0.001996
BIN1	chr2:127805598-127864903	siGATA6	siNT	OK	58.4747	85.0592	0.540656	2.53953	5e-05	0.000731486
BLOC1S6	chr15:45879416-45901909	siGATA6	siNT	OK	5.13558	10.3102	1.00548	3.86848	5e-05	0.000731486
BLVRB	chr19:40953690-40971725	siGATA6	siNT	OK	362.036	504.899	0.479862	2.38334	5e-05	0.000731486
BPIFB1	chr20:31870940-31897684	siGATA6	siNT	OK	0.778492	2.39031	1.61844	3.52324	5e-05	0.000731486
BRSK2	chr11:1411128-1483919	siGATA6	siNT	OK	1.07838	1.81856	0.753929	2.17359	0.00025	0.00313443
BTD	chr3:15643254-15687325	siGATA6	siNT	OK	2.65728	4.20737	0.662971	1.97194	0.0006	0.0066155
BTNL8	chr5:180326076-180377906	siGATA6	siNT	OK	1.95378	34.4598	4.14058	13.3187	5e-05	0.000731486
C12orf75	chr12:105724413-105765296	siGATA6	siNT	OK	23.7079	41.8479	0.819789	3.30431	5e-05	0.000731486
C19orf10	chr19:4657556-4670415	siGATA6	siNT	OK	117.554	155.024	0.399174	1.85583	0.00155	0.0143467
C19orf77	chr19:3474404-3480540	siGATA6	siNT	OK	12.2588	53.9918	2.13892	7.60068	5e-05	0.000731486
C1GALT1	chr7:7222245-7288280	siGATA6	siNT	OK	2.78941	4.83802	0.794455	2.91667	5e-05	0.000731486
C1GALT1C1	chrX:119759528-119764005	siGATA6	siNT	OK	16.4807	27.5966	0.743715	2.91698	5e-05	0.000731486
C1orf21	chr1:184356149-184598155	siGATA6	siNT	OK	2.95246	4.24294	0.523144	2.10485	0.00025	0.00313443
C2CD4A	chr15:62359175-62363116	siGATA6	siNT	OK	0.70554	4.87754	2.78935	7.7261	5e-05	0.000731486
C2orf72	chr2:231902280-231914427	siGATA6	siNT	OK	7.98991	24.0618	1.59049	6.59185	5e-05	0.000731486
C3orf70	chr3:184795837-184870802	siGATA6	siNT	OK	1.29937	2.32606	0.840079	2.72505	5e-05	0.000731486
C4BPB	chr1:207262211-207273337	siGATA6	siNT	OK	18.8345	47.1835	1.3249	4.93669	5e-05	0.000731486
C6orf222	chr6:36283534-36304662	siGATA6	siNT	OK	0.952734	2.00766	1.07537	3.00742	5e-05	0.000731486
C9orf152	chr9:112961845-112970413	siGATA6	siNT	OK	35.2367	59.1301	0.746816	3.45918	5e-05	0.000731486
CA13	chr8:86157715-86196302	siGATA6	siNT	OK	5.46466	11.4486	1.06697	4.14036	5e-05	0.000731486
CA2	chr8:86376130-86393721	siGATA6	siNT	OK	9.44984	23.3147	1.30288	4.83281	5e-05	0.000731486
CA8	chr8:61101422-61193954	siGATA6	siNT	OK	6.12693	13.0027	1.08558	3.92483	5e-05	0.000731486
CABIN1	chr22:24407764-24574596	siGATA6	siNT	OK	8.61984	14.4955	0.749875	3.30779	5e-05	0.000731486
CACNA2D3	chr3:54156692-55108584	siGATA6	siNT	OK	0.472707	1.59471	1.75427	4.11094	5e-05	0.000731486
CACNG6	chr19:54495541-54515920	siGATA6	siNT	OK	0.746805	4.21598	2.49707	5.39518	5e-05	0.000731486
CADPS	chr3:62384020-62861064	siGATA6	siNT	OK	1.38614	3.50392	1.33789	4.43526	5e-05	0.000731486
CALM2	chr2:47387220-47403740	siGATA6	siNT	OK	274.597	462.43	0.751922	3.75006	5e-05	0.000731486
CAP1	chr1:40506254-40538321	siGATA6	siNT	OK	118.161	166.397	0.493869	2.48421	5e-05	0.000731486
CAPN8	chr1:223714971-223853436	siGATA6	siNT	OK	28.1028	40.352	0.521929	2.27506	5e-05	0.000731486
CAPRIN2	chr12:30862485-30907448	siGATA6	siNT	OK	1.17735	2.23869	0.927114	2.75697	5e-05	0.000731486
CARD11	chr7:2945709-3083509	siGATA6	siNT	OK	8.27556	16.8768	1.02811	4.31119	5e-05	0.000731486
CASK	chrX:41374188-41782287	siGATA6	siNT	OK	4.21373	9.71145	1.20459	5.11146	5e-05	0.000731486
CAV2	chr7:116139654-116148595	siGATA6	siNT	OK	6.97383	9.63062	0.465678	1.7624	0.0016	0.0147244
CBFB	chr16:67063049-67134958	siGATA6	siNT	OK	5.98428	9.58227	0.679189	2.52558	5e-05	0.000731486
CBLB	chr3:105377108-105587887	siGATA6	siNT	OK	3.81674	5.19085	0.443629	1.58509	0.00595	0.0422206
CCDC68	chr18:52568739-52626739	siGATA6	siNT	OK	0.987515	1.58723	0.68464	1.89764	0.00115	0.0112204
CCDC85A	chr2:56411257-56613309	siGATA6	siNT	OK	0.362091	1.21182	1.74275	3.96264	5e-05	0.000731486
CCK	chr3:42299317-42307662	siGATA6	siNT	OK	122.31	259.224	1.08366	4.80723	5e-05	0.000731486
CCPG1	chr15:55611132-55800432	siGATA6	siNT	OK	15.0721	22.9437	0.606218	2.35267	5e-05	0.000731486
CCR6	chr6:167525294-167552629	siGATA6	siNT	OK	0.207213	1.81183	3.12826	5.73363	5e-05	0.000731486
CCSER1	chr4:91048683-92523370	siGATA6	siNT	OK	2.07899	3.54462	0.769749	2.48952	5e-05	0.000731486
CD55	chr1:207494816-207534311	siGATA6	siNT	OK	10.2175	18.3809	0.847168	3.42826	5e-05	0.000731486
CD59	chr11:33724555-33758025	siGATA6	siNT	OK	25.1079	39.9249	0.669145	3.2794	5e-05	0.000731486
CD82	chr11:44587140-44641315	siGATA6	siNT	OK	59.8153	82.763	0.468473	2.15828	0.0002	0.00257825
CDC14B	chr9:99262394-99382112	siGATA6	siNT	OK	6.20484	8.56974	0.465858	1.88235	0.00115	0.0112204
CDC42BPA	chr1:227177565-227505826	siGATA6	siNT	OK	9.45378	13.4396	0.507522	2.36942	0.00015	0.001996
CDC42EP1	chr22:37956470-37965410	siGATA6	siNT	OK	87.693	146.016	0.735595	3.59317	5e-05	0.000731486
CDC42EP5	chr19:54976209-54984422	siGATA6	siNT	OK	46.0041	70.3074	0.611915	2.49524	5e-05	0.000731486
CDH1	chr16:68771194-68869444	siGATA6	siNT	OK	80.1193	119.668	0.578815	2.94881	5e-05	0.000731486
CDH11	chr16:64980682-65155919	siGATA6	siNT	OK	10.0651	14.2947	0.506112	2.08055	0.00045	0.00522253
CDH17	chr8:95139393-95229531	siGATA6	siNT	OK	36.8667	105.326	1.51447	7.36888	5e-05	0.000731486
CDKN1A	chr6:36644236-36655116	siGATA6	siNT	OK	36.7144	48.4227	0.399337	1.78772	0.002	0.0175959
CEACAM18	chr19:51979837-51986611	siGATA6	siNT	OK	0.475006	1.92333	2.01759	3.16536	5e-05	0.000731486
CEBPA	chr19:33790839-33793430	siGATA6	siNT	OK	32.7362	52.236	0.674157	3.08259	5e-05	0.000731486
CENPV	chr17:16245847-16256812	siGATA6	siNT	OK	106.319	169.704	0.674629	3.1661	5e-05	0.000731486
CEP76	chr18:12658737-12725739	siGATA6	siNT	OK	17.8669	30.5331	0.773082	1.9425	0.00095	0.00956802
CERK	chr22:47080306-47134152	siGATA6	siNT	OK	8.57426	11.9159	0.474805	1.96338	0.00075	0.00792795
CERS6	chr2:169312758-169642939	siGATA6	siNT	OK	8.06569	12.3695	0.616917	2.63657	5e-05	0.000731486
CHMP2B	chr3:87276412-87304698	siGATA6	siNT	OK	19.0677	25.2544	0.4054	1.69538	0.00285	0.0234466
CHN2	chr7:29234120-29553944	siGATA6	siNT	OK	1.98539	3.30556	0.735469	2.3061	0.00015	0.001996
CHP1	chr15:41523436-41574083	siGATA6	siNT	OK	39.2129	54.4435	0.473431	2.23333	5e-05	0.000731486
CHPT1	chr12:102091416-102133250	siGATA6	siNT	OK	9.76825	13.7713	0.495489	1.74944	0.0026	0.0216966
CHSY1	chr15:101715927-101792137	siGATA6	siNT	OK	5.79474	7.96206	0.458399	1.79595	0.0024	0.0203594
CISH	chr3:50643884-50649262	siGATA6	siNT	OK	5.16001	8.17067	0.663081	2.24808	0.0001	0.00138839
CLCN4	chrX:10124984-10205699	siGATA6	siNT	OK	2.61536	5.02256	0.941411	3.54369	5e-05	0.000731486
CLDN18	chr3:137717657-137752494	siGATA6	siNT	OK	1.3169	35.0793	4.73541	15.7609	5e-05	0.000731486
CLDN2	chrX:106143292-106174091	siGATA6	siNT	OK	35.2752	177.422	2.33046	11.1892	5e-05	0.000731486
CLMN	chr14:95648275-95786245	siGATA6	siNT	OK	2.03345	3.02447	0.572749	2.25974	5e-05	0.000731486
CLPTM1L	chr5:1317999-1345002	siGATA6	siNT	OK	41.7903	58.5127	0.485581	2.21689	5e-05	0.000731486
CLU	chr8:27454433-27472328	siGATA6	siNT	OK	15.1801	32.0908	1.07997	4.64087	5e-05	0.000731486
CNKSR3	chr6:154726432-154831753	siGATA6	siNT	OK	4.44294	7.51098	0.757484	2.71836	5e-05	0.000731486
CNNM1	chr10:101088855-101154087	siGATA6	siNT	OK	3.93313	5.24155	0.414315	1.59286	0.00575	0.0410976
CNNM3	chr2:97481990-97501121	siGATA6	siNT	OK	7.9379	10.8986	0.457317	1.90006	0.001	0.00995412
COL17A1	chr10:105791045-105845638	siGATA6	siNT	OK	0.713187	1.45858	1.03221	2.9365	5e-05	0.000731486
COMMD7	chr20:31290492-31331814	siGATA6	siNT	OK	30.7284	47.5222	0.629027	2.75906	5e-05	0.000731486
COPB1	chr11:14479048-14521441	siGATA6	siNT	OK	38.7055	51.4997	0.412024	1.92931	0.0007	0.00747348
COPG1	chr3:128968452-128996616	siGATA6	siNT	OK	56.3743	74.4839	0.401891	1.93862	0.0007	0.00747348
COTL1	chr16:84599203-84651669	siGATA6	siNT	OK	214.781	280.803	0.38669	1.95758	0.0006	0.0066155
CPD	chr17:28705941-28796675	siGATA6	siNT	OK	14.7636	33.4742	1.181	5.63874	5e-05	0.000731486
CPLX1	chr4:778744-819945	siGATA6	siNT	OK	12.5437	18.1467	0.532743	2.07557	0.00045	0.00522253
CPT1A	chr11:68522087-68609399	siGATA6	siNT	OK	28.5788	41.3438	0.532724	2.20802	0.00015	0.001996
CRABP1	chr15:78632665-78640572	siGATA6	siNT	OK	1.00667	2.19173	1.12248	1.76709	0.00505	0.0369611
CREB3L1	chr11:46299227-46342972	siGATA6	siNT	OK	47.6051	113.011	1.24727	5.96852	5e-05	0.000731486
CREG2	chr2:101964815-102003965	siGATA6	siNT	OK	2.8645	4.88716	0.77071	2.60343	5e-05	0.000731486
CRISPLD2	chr16:84853586-84943116	siGATA6	siNT	OK	1.48069	3.02989	1.033	3.30098	5e-05	0.000731486
CRY1	chr12:107385142-107487635	siGATA6	siNT	OK	4.90286	7.34357	0.582859	2.11365	0.0004	0.00473235
CRYL1	chr13:20977805-21100012	siGATA6	siNT	OK	11.2747	20.5019	0.862673	3.16767	5e-05	0.000731486
CSF1	chr1:110453232-110473616	siGATA6	siNT	OK	0.666391	1.26735	0.927375	2.1793	0.0001	0.00138839
CTNNAL1	chr9:111704850-111775764	siGATA6	siNT	OK	38.4	69.2589	0.850892	3.85089	5e-05	0.000731486
CTSC	chr11:88026759-88070941	siGATA6	siNT	OK	107.862	237.975	1.14162	5.62654	5e-05	0.000731486
CTSE	chr1:206317458-206332104	siGATA6	siNT	OK	144.726	728.328	2.33126	11.9123	5e-05	0.000731486
CTSH	chr15:79214091-79237420	siGATA6	siNT	OK	82.3243	134.249	0.705517	3.32448	5e-05	0.000731486
CUL4B	chrX:119658445-119709684	siGATA6	siNT	OK	7.76963	14.8963	0.939038	3.92203	5e-05	0.000731486
CXADR	chr21:18885223-18965897	siGATA6	siNT	OK	2.81639	4.46155	0.663696	1.72482	0.0033	0.0265014
CXCR4	chr2:136871918-136875725	siGATA6	siNT	OK	7.85233	22.2171	1.50048	5.44772	5e-05	0.000731486
CYFIP1	chr15:22892683-23003603	siGATA6	siNT	OK	39.6546	55.8655	0.494467	2.39816	5e-05	0.000731486
CYP2C18	chr10:96443250-96495947	siGATA6	siNT	OK	0.377848	1.98556	2.39367	4.75109	5e-05	0.000731486
CYP2E1	chr10:135340866-135352620	siGATA6	siNT	OK	1.96512	3.40123	0.79144	2.11307	0.00055	0.00615433
CYP2J2	chr1:60358979-60392423	siGATA6	siNT	OK	3.60216	5.6423	0.647419	1.98882	0.0008	0.00835302
CYP2S1	chr19:41699114-41713444	siGATA6	siNT	OK	87.5347	200.602	1.19641	5.94907	5e-05	0.000731486
CYSTM1	chr5:139554652-139623374	siGATA6	siNT	OK	124.983	527.786	2.07823	9.92369	5e-05	0.000731486
CYTH1	chr17:76670129-76778376	siGATA6	siNT	OK	8.30068	11.2703	0.441228	1.73439	0.00235	0.0200683
DACT2	chr6:168707583-168720402	siGATA6	siNT	OK	6.09636	11.3045	0.890877	3.33491	5e-05	0.000731486
DAP	chr5:10679341-10761387	siGATA6	siNT	OK	53.4225	79.0736	0.565748	2.66776	5e-05	0.000731486
DAPK1	chr9:90112755-90323549	siGATA6	siNT	OK	13.2142	23.6745	0.84125	3.85292	5e-05	0.000731486
DDC	chr7:50526133-50633154	siGATA6	siNT	OK	13.3049	34.1941	1.36179	5.48106	5e-05	0.000731486
DGKD	chr2:234263152-234380743	siGATA6	siNT	OK	4.44375	6.83107	0.620332	2.47922	5e-05	0.000731486
DHRS7	chr14:60611499-60632211	siGATA6	siNT	OK	33.4793	58.7857	0.812197	3.46628	5e-05	0.000731486
DKK1	chr10:54074040-54077417	siGATA6	siNT	OK	10.6679	21.1698	0.988736	3.74101	5e-05	0.000731486
DKK4	chr8:42231585-42234674	siGATA6	siNT	OK	0.307019	2.73532	3.15531	3.72335	0.00015	0.001996
DLG5	chr10:79550548-79686348	siGATA6	siNT	OK	9.7702	12.7197	0.380604	1.70272	0.0034	0.0271682
DMXL2	chr15:51739920-51914967	siGATA6	siNT	OK	1.03853	1.56959	0.595847	2.02401	0.00035	0.00425081
DNAJB11	chr3:186288466-186303589	siGATA6	siNT	OK	124.745	168.333	0.432344	2.11243	0.00025	0.00313443
DNAJC15	chr13:43597361-43683306	siGATA6	siNT	OK	8.87002	11.8977	0.423668	1.62062	0.00495	0.0363331
DNAJC22	chr12:49741040-49745685	siGATA6	siNT	OK	22.68	31.9676	0.495188	2.05677	0.0004	0.00473235
DOCK11	chrX:117629871-117820123	siGATA6	siNT	OK	0.81621	1.3918	0.769937	2.31386	5e-05	0.000731486
DOPEY2	chr21:37536838-37666572	siGATA6	siNT	OK	6.11375	9.0249	0.561853	2.41023	5e-05	0.000731486
DPYSL2	chr8:26371708-26515693	siGATA6	siNT	OK	17.5716	39.9775	1.18594	5.45904	5e-05	0.000731486
DYNC1H1	chr14:102430864-102517135	siGATA6	siNT	OK	13.1285	17.4062	0.406906	1.97641	0.00035	0.00425081
EDA	chrX:68835910-69259321	siGATA6	siNT	OK	2.00846	3.30709	0.719469	1.87682	0.0025	0.0210128
EGFL7	chr9:139553307-139567130	siGATA6	siNT	OK	89.3599	116.289	0.38002	1.7618	0.00175	0.0158204
EGLN3	chr14:34393420-34420284	siGATA6	siNT	OK	8.96494	12.4886	0.478247	1.84458	0.002	0.0175959
EGR3	chr8:22545173-22550815	siGATA6	siNT	OK	0.781877	1.4877	0.928069	2.52087	5e-05	0.000731486
EHD4	chr15:42191638-42264755	siGATA6	siNT	OK	35.1446	46.751	0.411697	1.90453	0.0009	0.00913632
EIF4E3	chr3:71728439-71804328	siGATA6	siNT	OK	0.75537	1.16384	0.623639	1.78966	0.00205	0.0179249
EIF5A2	chr3:170606203-170626426	siGATA6	siNT	OK	1.80187	3.22756	0.840947	2.84294	5e-05	0.000731486
ELOVL6	chr4:110970228-111119820	siGATA6	siNT	OK	6.56396	12.4335	0.921596	3.54354	5e-05	0.000731486
ENAH	chr1:225674533-225840845	siGATA6	siNT	OK	6.16985	10.0863	0.709087	3.25651	5e-05	0.000731486
ENDOD1	chr11:94822973-94865815	siGATA6	siNT	OK	13.641	18.9968	0.477808	2.10884	0.00025	0.00313443
ENPP1	chr6:132129155-132216295	siGATA6	siNT	OK	0.367574	1.08516	1.5618	4.22584	5e-05	0.000731486
EPB41L1	chr20:34679425-34820721	siGATA6	siNT	OK	39.0909	57.0539	0.545493	2.69473	5e-05	0.000731486
EPB41L2	chr6:131160487-131384462	siGATA6	siNT	OK	13.9797	46.459	1.73262	7.77952	5e-05	0.000731486
EPHA4	chr2:222282746-222437010	siGATA6	siNT	OK	1.36047	3.45044	1.34267	4.5639	5e-05	0.000731486
EPHB6	chr7:142552791-142568847	siGATA6	siNT	OK	1.53127	6.2391	2.02661	6.65165	5e-05	0.000731486
EPS8L3	chr1:110292701-110306644	siGATA6	siNT	OK	19.0187	33.4722	0.815548	3.45343	5e-05	0.000731486
ERGIC1	chr5:172261222-172379688	siGATA6	siNT	OK	51.1229	107.651	1.07432	5.20522	5e-05	0.000731486
ERMP1	chr9:5784571-5833081	siGATA6	siNT	OK	16.4466	21.8418	0.409303	1.86358	0.00105	0.0104194
ETFB	chr19:51848408-51869672	siGATA6	siNT	OK	395.497	812.373	1.03848	5.22304	5e-05	0.000731486
EXOC6B	chr2:72406443-73053177	siGATA6	siNT	OK	5.35664	7.34047	0.454545	1.58582	0.006	0.0425047
EXT1	chr8:118811601-119124058	siGATA6	siNT	OK	32.3741	42.5034	0.392736	1.83041	0.00155	0.0143467
F3	chr1:94994731-95007413	siGATA6	siNT	OK	2.09062	3.56892	0.771557	2.27673	0.0001	0.00138839
F5	chr1:169481191-169555769	siGATA6	siNT	OK	8.44458	18.1597	1.10464	5.06287	5e-05	0.000731486
FABP5	chr8:82192717-82197012	siGATA6	siNT	OK	31.9148	43.4437	0.444922	1.64223	0.0047	0.0350406
FAM101A	chr12:124457761-124800570	siGATA6	siNT	OK	9.24775	46.7016	2.3363	4.57672	5e-05	0.000731486
FAM105A	chr5:14581890-14616287	siGATA6	siNT	OK	4.15156	5.91031	0.509579	2.03192	0.00035	0.00425081
FAM107B	chr10:14560558-14816896	siGATA6	siNT	OK	12.2838	22.2874	0.85947	3.69413	5e-05	0.000731486
FAM109A	chr12:111798454-111806925	siGATA6	siNT	OK	10.7745	29.6115	1.45853	6.11892	5e-05	0.000731486
FAM110B	chr8:58907112-59062277	siGATA6	siNT	OK	2.54565	4.23502	0.734337	2.52421	5e-05	0.000731486
FAM118A	chr22:45705080-45737836	siGATA6	siNT	OK	5.99628	8.56773	0.514846	1.88743	0.0011	0.01084
FAM134B	chr5:16473146-16617167	siGATA6	siNT	OK	0.622565	1.56743	1.33211	3.26135	5e-05	0.000731486
FAM135A	chr6:71123106-71270877	siGATA6	siNT	OK	3.46846	6.23834	0.846868	3.13344	5e-05	0.000731486
FAM171A1	chr10:15253643-15413058	siGATA6	siNT	OK	10.8872	21.641	0.991137	4.25214	5e-05	0.000731486
FAM189A2	chr9:71939487-72007370	siGATA6	siNT	OK	0.382838	4.84617	3.66204	7.14308	5e-05	0.000731486
FAM3B	chr21:42688660-42729654	siGATA6	siNT	OK	8.06532	13.5386	0.747278	2.50676	5e-05	0.000731486
FAM46A	chr6:82455446-82462428	siGATA6	siNT	OK	3.18818	19.4881	2.61179	10.3828	5e-05	0.000731486
FAM46C	chr1:118148603-118171011	siGATA6	siNT	OK	0.692583	4.27289	2.62515	8.05149	5e-05	0.000731486
FAM84B	chr8:127564682-127570711	siGATA6	siNT	OK	24.1559	31.5098	0.383425	1.81695	0.0014	0.0132359
FAR1	chr11:13690205-13753893	siGATA6	siNT	OK	10.3923	15.8755	0.61128	2.65966	5e-05	0.000731486
FAT1	chr4:187508936-187644987	siGATA6	siNT	OK	14.5371	19.9438	0.456201	2.24143	0.00015	0.001996
FBLIM1	chr1:16085254-16113084	siGATA6	siNT	OK	20.9662	29.0097	0.468469	2.06775	0.0002	0.00257825
FBP1	chr9:97365420-97402531	siGATA6	siNT	OK	12.7839	33.4353	1.38704	5.36492	5e-05	0.000731486
FBRSL1	chr12:133067156-133161773	siGATA6	siNT	OK	9.74337	13.2551	0.444056	1.86241	0.0009	0.00913632
FBXO9	chr6:52929795-52965670	siGATA6	siNT	OK	6.07469	8.29354	0.449178	1.78047	0.00235	0.0200683
FER1L6	chr8:124864226-125132302	siGATA6	siNT	OK	0.470459	1.22288	1.37814	3.70118	5e-05	0.000731486
FFAR4	chr10:95326421-95349829	siGATA6	siNT	OK	1.8061	3.72409	1.04401	3.30888	5e-05	0.000731486
FGD2	chr6:36973422-36996845	siGATA6	siNT	OK	0.498844	1.75232	1.81261	4.19796	5e-05	0.000731486
FGD4	chr12:32655040-32798984	siGATA6	siNT	OK	1.21558	2.2886	0.912826	3.11132	5e-05	0.000731486
FGFR2	chr10:123237843-123357972	siGATA6	siNT	OK	3.20976	5.98609	0.899149	2.92237	5e-05	0.000731486
FKBP9	chr7:32997004-33046543	siGATA6	siNT	OK	22.9687	36.2562	0.658557	2.9959	5e-05	0.000731486
FLJ23867	chr1:180123967-180169859	siGATA6	siNT	OK	25.9856	46.7916	0.848534	1.64856	0.00485	0.0359287
FLNB	chr3:57994126-58157982	siGATA6	siNT	OK	59.2414	83.8563	0.501312	2.56674	5e-05	0.000731486
FN1	chr2:216225178-216300791	siGATA6	siNT	OK	0.324606	1.09563	1.755	4.38051	5e-05	0.000731486
FOS	chr14:75745480-75748937	siGATA6	siNT	OK	12.4846	24.0855	0.948016	3.77796	5e-05	0.000731486
FOXA2	chr20:22561641-22566101	siGATA6	siNT	OK	11.5212	26.1001	1.17977	4.77858	5e-05	0.000731486
FOXN3	chr14:89622515-90085494	siGATA6	siNT	OK	5.00892	6.54785	0.386521	1.5942	0.0057	0.0408314
FRK	chr6:116262692-116381921	siGATA6	siNT	OK	10.516	14.8545	0.498316	1.97689	0.0005	0.00567924
FRMD3	chr9:85857904-86153348	siGATA6	siNT	OK	5.70293	13.077	1.19725	3.3067	5e-05	0.000731486
FRRS1	chr1:100111430-100231349	siGATA6	siNT	OK	1.32713	4.45239	1.74627	4.26296	5e-05	0.000731486
FSTL3	chr19:676388-683392	siGATA6	siNT	OK	34.1036	69.9432	1.03626	4.78855	5e-05	0.000731486
FUCA2	chr6:143815948-143833020	siGATA6	siNT	OK	21.2738	28.6691	0.430421	1.85511	0.00145	0.0135981
FUOM	chr10:135168657-135171529	siGATA6	siNT	OK	12.3332	18.7371	0.60335	1.78641	0.00165	0.0150439
FURIN	chr15:91411884-91426687	siGATA6	siNT	OK	44.8608	59.6827	0.411857	2.00066	0.0006	0.0066155
FUT2	chr19:49199227-49209191	siGATA6	siNT	OK	15.7215	22.0428	0.48757	2.08329	0.0002	0.00257825
FUT8	chr14:65877309-66210839	siGATA6	siNT	OK	17.5426	23.9212	0.44743	2.01095	0.0005	0.00567924
FUT9	chr6:96463844-96663488	siGATA6	siNT	OK	0.669066	1.13997	0.768772	2.51295	5e-05	0.000731486
GAB1	chr4:144257982-144395718	siGATA6	siNT	OK	0.706335	1.02644	0.539228	1.60806	0.0053	0.0384393
GAL3ST4	chr7:99756864-99766373	siGATA6	siNT	OK	2.27921	3.56765	0.646441	1.92119	0.0013	0.0124747
GALC	chr14:88399357-88460009	siGATA6	siNT	OK	5.24865	14.1822	1.43406	5.62421	5e-05	0.000731486
GALM	chr2:38893051-38961909	siGATA6	siNT	OK	21.9526	29.3318	0.418075	1.80222	0.00145	0.0135981
GALNT1	chr18:33234532-33291798	siGATA6	siNT	OK	10.8229	14.5466	0.426599	1.77421	0.00205	0.0179249
GALNT10	chr5:153570294-153825382	siGATA6	siNT	OK	29.8753	43.2914	0.535127	2.59609	5e-05	0.000731486
GALNT3	chr2:166604312-166650803	siGATA6	siNT	OK	47.7447	81.2448	0.766935	3.70554	5e-05	0.000731486
GALNT6	chr12:51745832-51909547	siGATA6	siNT	OK	17.5591	25.5992	0.54388	2.38924	5e-05	0.000731486
GALNT7	chr4:174089903-174245118	siGATA6	siNT	OK	15.3837	24.53	0.673147	2.99562	5e-05	0.000731486
GALNT8	chr12:4829751-4881892	siGATA6	siNT	OK	0.652347	1.13811	0.802925	1.67352	0.0052	0.0378857
GAS6	chr13:114518582-114567046	siGATA6	siNT	OK	10.6441	21.3933	1.00711	3.95236	5e-05	0.000731486
GAS7	chr17:9813925-10101868	siGATA6	siNT	OK	0.334544	1.02299	1.61253	4.34903	5e-05	0.000731486
GATA6	chr18:19749403-19782491	siGATA6	siNT	OK	4.18699	34.877	3.05829	12.1234	5e-05	0.000731486
GBP2	chr1:89573309-89591799	siGATA6	siNT	OK	3.19534	7.29466	1.19087	3.95479	5e-05	0.000731486
GBP3	chr1:89472359-89488549	siGATA6	siNT	OK	6.04943	9.25818	0.613929	2.27192	5e-05	0.000731486
GCNT1	chr9:79056581-79122332	siGATA6	siNT	OK	2.44274	5.30322	1.11837	4.05654	5e-05	0.000731486
GCNT4	chr5:74323288-74326724	siGATA6	siNT	OK	0.104617	1.54187	3.88148	5.5868	5e-05	0.000731486
GDA	chr9:74729510-74867140	siGATA6	siNT	OK	26.8861	55.9379	1.05697	3.91271	5e-05	0.000731486
GDPD1	chr17:57297827-57353330	siGATA6	siNT	OK	0.804096	1.72451	1.10075	1.74759	0.0049	0.0361735
GDPD3	chr16:30116130-30124878	siGATA6	siNT	OK	21.8246	30.2639	0.471644	1.78536	0.00215	0.0185584
GFM1	chr3:158362316-158410360	siGATA6	siNT	OK	36.1209	47.4855	0.394653	1.83457	0.00155	0.0143467
GFOD1	chr6:13363586-13487869	siGATA6	siNT	OK	1.46269	2.66136	0.863543	2.39118	5e-05	0.000731486
GGT1	chr22:24979717-25024972	siGATA6	siNT	OK	23.9402	41.8972	0.807417	3.39344	5e-05	0.000731486
GLDC	chr9:6532463-6645692	siGATA6	siNT	OK	1.17425	4.20029	1.83874	5.63647	5e-05	0.000731486
GLG1	chr16:74481325-74641042	siGATA6	siNT	OK	12.4699	16.5299	0.406621	1.9076	0.001	0.00995412
GLUD1	chr10:88809958-88854776	siGATA6	siNT	OK	28.0746	37.0472	0.400102	1.84199	0.0016	0.0147244
GMDS	chr6:1624034-2245868	siGATA6	siNT	OK	116.789	176.292	0.594055	2.86903	5e-05	0.000731486
GNAQ	chr9:80335190-80646219	siGATA6	siNT	OK	20.9737	28.6673	0.450824	1.89334	0.001	0.00995412
GNPAT	chr1:231359508-231413719	siGATA6	siNT	OK	31.9979	42.3041	0.40282	1.64294	0.00365	0.0286297
GNS	chr12:65107221-65153226	siGATA6	siNT	OK	19.4233	35.9327	0.88751	4.16372	5e-05	0.000731486
GOLIM4	chr3:167727653-167813417	siGATA6	siNT	OK	11.2205	19.9683	0.831576	3.375	5e-05	0.000731486
GOLM1	chr9:88641057-88715116	siGATA6	siNT	OK	53.4168	86.7283	0.699211	3.41072	5e-05	0.000731486
GPR115	chr6:47666288-47689757	siGATA6	siNT	OK	9.65435	13.13	0.443619	1.77181	0.0026	0.0216966
GPR116	chr6:46820241-46922675	siGATA6	siNT	OK	0.199891	1.20707	2.59422	5.81149	5e-05	0.000731486
GPR160	chr3:169755734-169803183	siGATA6	siNT	OK	7.06073	10.6204	0.588947	2.04562	0.00015	0.001996
GPR161	chr1:168048779-168106905	siGATA6	siNT	OK	1.24614	10.1738	3.02932	11.0901	5e-05	0.000731486
GPRIN2	chr10:46993545-47000568	siGATA6	siNT	OK	1.76175	3.13084	0.829537	2.21462	0.0001	0.00138839
GRAMD4	chr22:47022657-47075688	siGATA6	siNT	OK	3.49764	4.96696	0.505981	1.8109	0.0024	0.0203594
GRB10	chr7:50657759-50861159	siGATA6	siNT	OK	5.22974	9.36641	0.840757	3.30936	5e-05	0.000731486
GRK5	chr10:120967196-121215131	siGATA6	siNT	OK	9.60172	24.0116	1.32237	5.28947	5e-05	0.000731486
GSDMB	chr17:38060847-38074903	siGATA6	siNT	OK	2.65057	14.7623	2.47754	7.55921	5e-05	0.000731486
GSDMD	chr8:144635556-144645231	siGATA6	siNT	OK	16.513	22.7343	0.46127	1.8231	0.00165	0.0150439
GSTA4	chr6:52842745-52860178	siGATA6	siNT	OK	9.71987	13.5722	0.481644	1.63587	0.00525	0.0381415
GSTM4	chr1:110198697-110208123	siGATA6	siNT	OK	10.0817	33.7227	1.74199	6.39171	5e-05	0.000731486
GSTO1	chr10:106013951-106027222	siGATA6	siNT	OK	67.3946	114.274	0.761798	3.35958	5e-05	0.000731486
GUCA2A	chr1:42628361-42630395	siGATA6	siNT	OK	8.39154	20.5221	1.29017	3.62808	5e-05	0.000731486
GUCD1	chr22:24936405-24951275	siGATA6	siNT	OK	53.3724	74.2493	0.476284	2.32141	5e-05	0.000731486
HABP2	chr10:115310589-115423829	siGATA6	siNT	OK	7.79004	43.2989	2.47463	10.1361	5e-05	0.000731486
HAS3	chr16:69139466-69166493	siGATA6	siNT	OK	6.88468	20.0663	1.54331	2.99057	5e-05	0.000731486
HEPH	chrX:65382432-65487230	siGATA6	siNT	OK	1.18372	2.68121	1.17956	3.57221	5e-05	0.000731486
HGD	chr3:120347014-120401418	siGATA6	siNT	OK	47.4613	67.5733	0.5097	2.34008	5e-05	0.000731486
HHEX	chr10:94449680-94455408	siGATA6	siNT	OK	5.27327	11.0967	1.07336	3.58365	5e-05	0.000731486
HID1	chr17:72946838-72968900	siGATA6	siNT	OK	50.7937	75.0117	0.562467	2.71666	5e-05	0.000731486
HK2	chr2:75059781-75120481	siGATA6	siNT	OK	14.5907	21.9582	0.589711	2.7522	5e-05	0.000731486
HMGCR	chr5:74632992-74657926	siGATA6	siNT	OK	5.26211	7.59139	0.528724	2.0604	0.0006	0.0066155
HMOX1	chr22:35777059-35790207	siGATA6	siNT	OK	58.221	76.6031	0.395862	1.80154	0.00155	0.0143467
HN1	chr17:73131343-73150775	siGATA6	siNT	OK	196.758	262.117	0.413793	2.07101	0.00025	0.00313443
HNF1B	chr17:36046433-36105096	siGATA6	siNT	OK	4.67342	9.95329	1.09069	3.88661	5e-05	0.000731486
HOOK3	chr8:42752032-42885682	siGATA6	siNT	OK	0.846379	1.23073	0.540137	1.87448	0.00135	0.0128773
HPSE	chr4:84213613-84256306	siGATA6	siNT	OK	5.35073	7.76424	0.537109	2.08773	0.00015	0.001996
HRASLS5	chr11:63014620-63330855	siGATA6	siNT	OK	0.397854	1.59935	2.00718	2.77536	0.0001	0.00138839
HSD17B11	chr4:88257690-88312455	siGATA6	siNT	OK	21.4223	40.1108	0.904873	3.78996	5e-05	0.000731486
HSD17B2	chr16:82068857-82132139	siGATA6	siNT	OK	6.9626	38.5271	2.46817	8.87362	5e-05	0.000731486
HSD17B4	chr5:118788137-118878030	siGATA6	siNT	OK	26.1482	58.0735	1.15117	5.25304	5e-05	0.000731486
HSDL2	chr9:115142188-115234685	siGATA6	siNT	OK	31.9297	43.5824	0.448845	2.09757	0.0003	0.00369971
HSPG2	chr1:22138757-22263750	siGATA6	siNT	OK	17.0336	26.451	0.634939	3.14933	5e-05	0.000731486
HTR1D	chr1:23518387-23521222	siGATA6	siNT	OK	3.91895	7.10653	0.85868	2.96049	5e-05	0.000731486
IARS	chr9:94972489-95056038	siGATA6	siNT	OK	88.0926	115.332	0.388695	1.9671	0.0005	0.00567924
ICK	chr6:52866097-52926600	siGATA6	siNT	OK	9.8199	17.6923	0.849343	3.81371	5e-05	0.000731486
ICOSLG	chr21:45646721-45660834	siGATA6	siNT	OK	8.65961	14.6472	0.758248	3.00828	5e-05	0.000731486
IDH1	chr2:209100952-209119806	siGATA6	siNT	OK	71.1667	131.244	0.882977	4.29095	5e-05	0.000731486
IFI35	chr17:41158741-41166476	siGATA6	siNT	OK	11.7924	17.6239	0.579668	2.03351	0.0004	0.00473235
IFNGR1	chr6:137518620-137540567	siGATA6	siNT	OK	38.6432	58.6723	0.602465	2.70883	5e-05	0.000731486
IFT88	chr13:21141207-21265576	siGATA6	siNT	OK	3.36253	4.7148	0.487651	1.60328	0.0056	0.0402502
IGFL2	chr19:46651038-46664561	siGATA6	siNT	OK	26.6908	85.3548	1.67713	6.02735	5e-05	0.000731486
IGSF9	chr1:159896828-159915386	siGATA6	siNT	OK	8.6623	12.5343	0.533063	2.17204	0.0004	0.00473235
IHH	chr2:219919141-219925238	siGATA6	siNT	OK	6.05776	19.8707	1.71378	6.23586	5e-05	0.000731486
IL1R1	chr2:102770401-102796334	siGATA6	siNT	OK	2.0264	4.49093	1.1481	3.96169	5e-05	0.000731486
IL1R2	chr2:102608305-102644884	siGATA6	siNT	OK	19.6028	34.6999	0.823869	3.30254	5e-05	0.000731486
IL1RAP	chr3:190231839-190374986	siGATA6	siNT	OK	4.09422	6.27861	0.616855	1.93236	0.00075	0.00792795
IL1RN	chr2:113875469-113891593	siGATA6	siNT	OK	2.73591	14.5059	2.40655	7.60322	5e-05	0.000731486
IL22RA1	chr1:24446260-24469775	siGATA6	siNT	OK	11.8067	17.0363	0.529006	2.15653	0.00025	0.00313443
IMPAD1	chr8:57870487-57906430	siGATA6	siNT	OK	15.8047	25.6314	0.697555	3.28519	5e-05	0.000731486
INADL	chr1:62208148-62629591	siGATA6	siNT	OK	3.05092	4.68381	0.618439	2.4424	5e-05	0.000731486
INPP1	chr2:191208195-191236391	siGATA6	siNT	OK	14.7236	20.767	0.496163	1.98231	0.0008	0.00835302
INPP4B	chr4:142949181-143767604	siGATA6	siNT	OK	4.84485	8.29161	0.7752	2.96859	5e-05	0.000731486
IQCE	chr7:2598631-2654368	siGATA6	siNT	OK	4.6165	6.19214	0.423638	1.69775	0.00425	0.0322682
IQGAP1	chr15:90931472-91045475	siGATA6	siNT	OK	71.1406	97.0989	0.448783	2.30842	5e-05	0.000731486
IQGAP2	chr5:75699148-76003957	siGATA6	siNT	OK	3.60835	8.15722	1.17674	4.58604	5e-05	0.000731486
IQGAP3	chr1:156495196-156542396	siGATA6	siNT	OK	21.931	29.079	0.407003	1.93082	0.0008	0.00835302
IRAK2	chr3:10206562-10285427	siGATA6	siNT	OK	2.32096	3.52712	0.603769	1.93015	0.00075	0.00792795
IRF8	chr16:85932773-85956211	siGATA6	siNT	OK	5.12663	10.5821	1.04555	3.76654	5e-05	0.000731486
ITGA2	chr5:52285155-52390609	siGATA6	siNT	OK	4.22559	8.92568	1.07881	4.48341	5e-05	0.000731486
ITGA6	chr2:173292313-173371181	siGATA6	siNT	OK	82.2157	149.385	0.861548	4.38005	5e-05	0.000731486
ITGAV	chr2:187454789-187545628	siGATA6	siNT	OK	7.65411	11.8383	0.629155	2.72387	5e-05	0.000731486
ITGB1	chr10:33189245-33247293	siGATA6	siNT	OK	50.6299	67.8066	0.421436	2.06127	0.00045	0.00522253
ITGB5	chr3:124481794-124606144	siGATA6	siNT	OK	39.9017	58.7078	0.557102	2.65094	5e-05	0.000731486
ITM2C	chr2:231729620-231743963	siGATA6	siNT	OK	69.2074	107.59	0.636552	3.04064	5e-05	0.000731486
ITPKA	chr15:41786055-41795757	siGATA6	siNT	OK	17.0163	27.8572	0.711134	2.86912	5e-05	0.000731486
ITSN1	chr21:35014783-35261609	siGATA6	siNT	OK	3.9461	7.37495	0.902206	3.49738	5e-05	0.000731486
JAG1	chr20:10618331-10654694	siGATA6	siNT	OK	20.139	45.7542	1.18391	5.66822	5e-05	0.000731486
JAK1	chr1:65210777-65432187	siGATA6	siNT	OK	21.6338	29.0692	0.426205	1.92085	0.00095	0.00956802
KALRN	chr3:123813557-124440036	siGATA6	siNT	OK	10.7596	26.5819	1.30482	5.88579	5e-05	0.000731486
KAT2B	chr3:20081523-20195896	siGATA6	siNT	OK	1.17805	2.44729	1.05479	3.23584	5e-05	0.000731486
KAZALD1	chr10:102820998-102825351	siGATA6	siNT	OK	3.86931	5.65361	0.547097	1.80408	0.0019	0.0169255
KCNC4	chr1:110753335-110776674	siGATA6	siNT	OK	1.63869	2.5075	0.61371	1.83302	0.0014	0.0132359
KCND3	chr1:112318453-112531777	siGATA6	siNT	OK	0.305854	2.55067	3.05996	5.88102	5e-05	0.000731486
KCNK2	chr1:215178884-215410436	siGATA6	siNT	OK	0.095292	2.75789	4.85507	6.69751	5e-05	0.000731486
KCNK5	chr6:39156746-39197251	siGATA6	siNT	OK	12.7676	21.3001	0.738375	3.17811	5e-05	0.000731486
KCNQ1	chr11:2466220-2870340	siGATA6	siNT	OK	18.8233	28.1391	0.580058	2.52428	5e-05	0.000731486
KCTD12	chr13:77454303-77460540	siGATA6	siNT	OK	2.88146	5.69722	0.983455	3.7266	5e-05	0.000731486
KCTD3	chr1:215740734-215795149	siGATA6	siNT	OK	19.8741	40.4789	1.02628	4.70547	5e-05	0.000731486
KDELC2	chr11:108342832-108369159	siGATA6	siNT	OK	1.86769	3.73023	0.998009	3.27808	5e-05	0.000731486
KDELR2	chr7:6500711-6523849	siGATA6	siNT	OK	84.0248	120.299	0.517736	2.56222	5e-05	0.000731486
KDM5B	chr1:202696531-202777549	siGATA6	siNT	OK	4.58087	6.07713	0.407767	1.62156	0.00495	0.0363331
KIAA1211	chr4:57036360-57196890	siGATA6	siNT	OK	0.878196	2.81132	1.67863	5.43108	5e-05	0.000731486
KIAA1551	chr12:32112352-32146043	siGATA6	siNT	OK	3.55269	5.20578	0.551203	2.05959	0.0003	0.00369971
KIF13B	chr8:28924794-29120610	siGATA6	siNT	OK	5.96776	9.31529	0.642411	2.79416	5e-05	0.000731486
KIF5B	chr10:32297937-32345371	siGATA6	siNT	OK	26.9945	35.707	0.403539	1.93422	0.0006	0.0066155
KITLG	chr12:88886569-88974250	siGATA6	siNT	OK	2.14907	3.78692	0.817309	2.78208	5e-05	0.000731486
KLC2	chr11:66024764-66035332	siGATA6	siNT	OK	12.8197	16.9305	0.401267	1.63086	0.0048	0.0356202
KLF13	chr15:31619082-31670102	siGATA6	siNT	OK	21.4245	29.9386	0.482747	2.3131	0.0002	0.00257825
KLHL23	chr2:170550963-170608396	siGATA6	siNT	OK	0.897867	2.26453	1.33464	2.45141	0.00025	0.00313443
KLHL8	chr4:88082213-88141674	siGATA6	siNT	OK	5.24921	7.87857	0.585834	2.2543	0.00025	0.00313443
KLK1	chr19:51322403-51327043	siGATA6	siNT	OK	1.20134	3.37024	1.48821	2.81517	5e-05	0.000731486
KRT13	chr17:39657232-39661865	siGATA6	siNT	OK	0.93139	5.37785	2.52957	6.03482	5e-05	0.000731486
LAMA3	chr18:21269561-21535029	siGATA6	siNT	OK	39.5441	59.6276	0.592519	2.90469	5e-05	0.000731486
LAMB1	chr7:107564245-107643804	siGATA6	siNT	OK	17.3668	26.8635	0.629316	2.92913	5e-05	0.000731486
LAMC1	chr1:182992594-183114727	siGATA6	siNT	OK	42.4242	73.4971	0.792799	4.026	5e-05	0.000731486
LDHD	chr16:75145757-75150670	siGATA6	siNT	OK	1.0442	1.71397	0.714936	1.68816	0.0039	0.0301291
LDLR	chr19:11200037-11244505	siGATA6	siNT	OK	29.4144	51.4376	0.806302	3.91287	5e-05	0.000731486
LEPREL1	chr3:189674516-189840226	siGATA6	siNT	OK	5.76676	11.712	1.02216	3.8929	5e-05	0.000731486
LGALS2	chr22:37966252-37976024	siGATA6	siNT	OK	0.783918	2.29882	1.55212	1.87865	0.0054	0.0390539
LGALS3BP	chr17:76967334-76976061	siGATA6	siNT	OK	149.009	199.53	0.421199	2.11731	5e-05	0.000731486
LGALS4	chr19:39292310-39303740	siGATA6	siNT	OK	197.269	785.163	1.99283	10.013	5e-05	0.000731486
LGMN	chr14:93170151-93215047	siGATA6	siNT	OK	55.7338	111.101	0.995254	4.70454	5e-05	0.000731486
LGR4	chr11:27387507-27494334	siGATA6	siNT	OK	29.6521	42.6931	0.52587	2.5065	5e-05	0.000731486
LGR5	chr12:71833812-71978621	siGATA6	siNT	OK	1.27472	7.90793	2.63312	7.92609	5e-05	0.000731486
LIG4	chr13:108859791-108870716	siGATA6	siNT	OK	2.53659	3.58648	0.499675	1.63479	0.004	0.0307163
LIMA1	chr12:50569562-50677353	siGATA6	siNT	OK	28.0344	49.6918	0.825811	3.89875	5e-05	0.000731486
LIMK2	chr22:31608249-31676066	siGATA6	siNT	OK	25.0805	41.967	0.74269	3.41339	5e-05	0.000731486
LINC00668	chr18:6925472-6929868	siGATA6	siNT	OK	1.34346	3.21407	1.25845	3.15875	5e-05	0.000731486
LINC00675	chr17:10616638-10718481	siGATA6	siNT	OK	1.06411	2.70187	1.34432	2.69683	0.0001	0.00138839
LMAN1	chr18:56995055-57026508	siGATA6	siNT	OK	9.7732	15.4439	0.660132	2.82895	5e-05	0.000731486
LOXL1	chr15:74209808-74244478	siGATA6	siNT	OK	7.5412	15.2717	1.018	3.30888	5e-05	0.000731486
LPAR2	chr19:19734465-19739039	siGATA6	siNT	OK	23.9034	31.5739	0.401518	1.66737	0.0034	0.0271682
LPCAT3	chr12:7085346-7125842	siGATA6	siNT	OK	35.1605	48.5131	0.464416	2.10009	0.00015	0.001996
LPCAT4	chr15:34651088-34659395	siGATA6	siNT	OK	29.2026	40.0137	0.454395	1.95377	0.0007	0.00747348
LPGAT1	chr1:211916798-212004114	siGATA6	siNT	OK	2.9976	5.04758	0.751781	2.9292	5e-05	0.000731486
LRCH1	chr13:47127295-47327175	siGATA6	siNT	OK	16.6106	22.9864	0.468678	2.12212	0.00025	0.00313443
LRIG3	chr12:59265936-59314319	siGATA6	siNT	OK	1.62223	3.90199	1.26623	4.06371	5e-05	0.000731486
LRP1	chr12:57522281-57607125	siGATA6	siNT	OK	2.35939	5.48411	1.21684	5.13441	5e-05	0.000731486
LRP10	chr14:23340959-23347291	siGATA6	siNT	OK	57.0763	84.2543	0.561859	2.73709	5e-05	0.000731486
LRP3	chr19:33685598-33716756	siGATA6	siNT	OK	7.12895	10.0295	0.492488	1.92834	0.0009	0.00913632
LRRC59	chr17:48450580-48474914	siGATA6	siNT	OK	174.113	249.494	0.518978	2.63113	5e-05	0.000731486
LYN	chr8:56792385-56925006	siGATA6	siNT	OK	26.9657	53.3445	0.984214	4.65275	5e-05	0.000731486
LYZ	chr12:69742133-69748013	siGATA6	siNT	OK	819.428	1850.69	1.17538	6.14033	5e-05	0.000731486
MAGED1	chrX:51546154-51645450	siGATA6	siNT	OK	20.6212	36.2369	0.813333	3.57292	5e-05	0.000731486
MAGI1	chr3:65339905-66024509	siGATA6	siNT	OK	6.35234	10.3017	0.697515	2.98749	5e-05	0.000731486
MAL2	chr8:120220609-120257914	siGATA6	siNT	OK	222.873	305.327	0.454131	2.29394	5e-05	0.000731486
MAN1A1	chr6:119498365-119670931	siGATA6	siNT	OK	3.71832	8.23368	1.14689	4.38555	5e-05	0.000731486
MAN2A1	chr5:109025155-109203429	siGATA6	siNT	OK	6.53963	9.04955	0.468638	1.88554	0.00085	0.00872562
MANBA	chr4:103552642-103682151	siGATA6	siNT	OK	5.20094	7.10751	0.450573	1.64459	0.00415	0.0316404
MANF	chr3:51422691-51426828	siGATA6	siNT	OK	129.649	200.452	0.628643	2.9373	5e-05	0.000731486
MAOA	chrX:43514154-43606071	siGATA6	siNT	OK	3.7835	7.02989	0.89378	3.45738	5e-05	0.000731486
MAP4K4	chr2:102314164-102511152	siGATA6	siNT	OK	12.1754	19.5258	0.681412	3.15643	5e-05	0.000731486
MAPK9	chr5:179660594-179719071	siGATA6	siNT	OK	10.9856	14.4004	0.390501	1.57387	0.0057	0.0408314
36951	#N/A	#N/A	#N/A	#N/A	#N/A	#N/A	#N/A	#N/A	#N/A	#N/A
MB21D2	chr3:192514604-192635950	siGATA6	siNT	OK	8.00426	13.9239	0.798724	3.18637	5e-05	0.000731486
MBOAT7	chr19:54677105-54693733	siGATA6	siNT	OK	34.5489	48.8464	0.499613	2.26973	0.0002	0.00257825
MCU	chr10:74451888-74647452	siGATA6	siNT	OK	20.094	27.9064	0.473834	2.07553	0.00025	0.00313443
ME1	chr6:83920109-84140938	siGATA6	siNT	OK	19.6168	33.7927	0.784623	3.5111	5e-05	0.000731486
MECOM	chr3:168801286-169381563	siGATA6	siNT	OK	3.28679	7.72324	1.23253	4.6152	5e-05	0.000731486
MED14	chrX:40508794-40594804	siGATA6	siNT	OK	6.03299	8.9038	0.561548	2.35903	5e-05	0.000731486
MEGF6	chr1:3404505-3528059	siGATA6	siNT	OK	1.3587	2.33009	0.778159	2.64153	5e-05	0.000731486
MFNG	chr22:37865100-37882478	siGATA6	siNT	OK	1.50369	3.78962	1.33354	3.65044	5e-05	0.000731486
MGAT4A	chr2:99235568-99347589	siGATA6	siNT	OK	0.816276	1.50823	0.885722	2.71349	5e-05	0.000731486
MGST2	chr4:140586921-141075233	siGATA6	siNT	OK	158.569	216.196	0.447228	1.93986	0.0007	0.00747348
MGST3	chr1:165600109-165625372	siGATA6	siNT	OK	83.5656	176.251	1.07665	5.12333	5e-05	0.000731486
MICAL2	chr11:12132137-12285331	siGATA6	siNT	OK	12.6625	22.7634	0.846147	3.66692	5e-05	0.000731486
MICALL2	chr7:1473994-1499109	siGATA6	siNT	OK	15.6785	29.0076	0.887639	3.8372	5e-05	0.000731486
MIR31HG	chr9:21454266-21559697	siGATA6	siNT	OK	0.958208	1.99869	1.06064	2.55601	0.0001	0.00138839
MLEC	chr12:121124948-121139667	siGATA6	siNT	OK	46.2024	67.8608	0.55461	2.79143	5e-05	0.000731486
MLXIPL	chr7:73007523-73038870	siGATA6	siNT	OK	2.8451	4.17538	0.553426	1.81286	0.00195	0.0172986
MMP1	chr11:102654406-102714342	siGATA6	siNT	OK	49.0546	759.648	3.95287	19.1818	5e-05	0.000731486
MMP15	chr16:58059281-58080804	siGATA6	siNT	OK	31.4235	56.7426	0.852591	4.09329	5e-05	0.000731486
MMP28	chr17:34092875-34122640	siGATA6	siNT	OK	10.296	21.8295	1.0842	3.4	5e-05	0.000731486
MORC4	chrX:106183963-106243474	siGATA6	siNT	OK	13.2295	33.4571	1.33855	5.9254	5e-05	0.000731486
MSI2	chr17:55333930-55757299	siGATA6	siNT	OK	22.401	37.7067	0.751259	3.09679	5e-05	0.000731486
MSL3	chrX:11776277-11793872	siGATA6	siNT	OK	6.74048	9.74745	0.532173	1.91455	0.0007	0.00747348
MSRB2	chr10:23384426-23410942	siGATA6	siNT	OK	19.241	25.4038	0.400857	1.61353	0.0054	0.0390539
MST1R	chr3:49924435-49941306	siGATA6	siNT	OK	7.88226	11.2843	0.517634	2.13607	0.00025	0.00313443
MTHFS	chr15:80135888-80217196	siGATA6	siNT	OK	9.77037	13.973	0.516156	1.83026	0.00165	0.0150439
MTMR2	chr11:95566043-95657371	siGATA6	siNT	OK	20.1356	27.171	0.432318	1.96953	0.0007	0.00747348
MTSS1	chr8:125563027-125740730	siGATA6	siNT	OK	7.24631	16.0106	1.14371	4.83494	5e-05	0.000731486
MUC1	chr1:155158299-155162706	siGATA6	siNT	OK	416.186	816.985	0.973079	4.9551	5e-05	0.000731486
MUC13	chr3:124624288-124653595	siGATA6	siNT	OK	98.488	131.751	0.419796	2.09644	0.0002	0.00257825
MUC6	chr11:1012823-1036706	siGATA6	siNT	OK	1.05878	5.3709	2.34275	8.19951	5e-05	0.000731486
MX2	chr21:42733949-42780869	siGATA6	siNT	OK	1.96062	4.36756	1.15551	3.58185	5e-05	0.000731486
MYADM	chr19:54369610-54379689	siGATA6	siNT	OK	69.8503	115.154	0.721226	3.55965	5e-05	0.000731486
MYH4	chr17:10346607-10372876	siGATA6	siNT	OK	0.105414	1.24487	3.56186	6.41666	5e-05	0.000731486
MYH9	chr22:36677322-36784063	siGATA6	siNT	OK	98.0248	127.536	0.379692	1.96359	0.0007	0.00747348
MYO1D	chr17:30819627-31203902	siGATA6	siNT	OK	19.9841	29.2492	0.549546	2.55936	5e-05	0.000731486
MYRF	chr11:61520120-61555989	siGATA6	siNT	OK	27.0173	40.3679	0.579326	2.77419	5e-05	0.000731486
NAGLU	chr17:40687950-40696466	siGATA6	siNT	OK	14.6494	19.5644	0.417391	1.73289	0.0028	0.0231244
NAPRT1	chr8:144656954-144660513	siGATA6	siNT	OK	44.8155	60.9179	0.44287	1.98224	0.0004	0.00473235
NBEAL2	chr3:46963230-47051194	siGATA6	siNT	OK	10.3078	17.1181	0.73179	2.91871	5e-05	0.000731486
NCK2	chr2:106361519-106510730	siGATA6	siNT	OK	16.0988	23.6981	0.557813	2.20641	0.0001	0.00138839
NCOA7	chr6:126102306-126253176	siGATA6	siNT	OK	3.92984	9.64205	1.29487	4.84749	5e-05	0.000731486
NDRG1	chr8:134249413-134309547	siGATA6	siNT	OK	19.0334	33.1718	0.801419	3.52697	5e-05	0.000731486
NELL1	chr11:20691116-21597229	siGATA6	siNT	OK	4.15505	17.842	2.10234	7.82509	5e-05	0.000731486
NFATC2	chr20:50003493-50179370	siGATA6	siNT	OK	0.94531	1.5374	0.70163	2.18834	0.0001	0.00138839
NFE2L3	chr7:26191846-26226756	siGATA6	siNT	OK	11.743	17.1587	0.547132	2.28066	5e-05	0.000731486
NFIB	chr9:14081841-14398982	siGATA6	siNT	OK	2.37202	3.33286	0.490645	1.82866	0.00115	0.0112204
NFIX	chr19:13106583-13209610	siGATA6	siNT	OK	2.7707	4.48333	0.694322	2.52454	5e-05	0.000731486
NIPAL1	chr4:48018790-48039080	siGATA6	siNT	OK	3.40933	7.27853	1.09416	3.48575	5e-05	0.000731486
NOSTRIN	chr2:169643048-169721849	siGATA6	siNT	OK	3.97278	8.12543	1.03229	3.34697	5e-05	0.000731486
NPAS2	chr2:101436612-101613287	siGATA6	siNT	OK	7.24299	9.80864	0.437468	1.73446	0.0032	0.0258443
NRCAM	chr7:107788070-108096841	siGATA6	siNT	OK	13.2618	20.4022	0.621452	2.83019	5e-05	0.000731486
NRP1	chr10:33466418-33623833	siGATA6	siNT	OK	5.57038	8.29964	0.575271	1.95963	0.0006	0.0066155
NTAN1	chr16:15131709-15149936	siGATA6	siNT	OK	20.7589	31.7952	0.615079	2.39046	5e-05	0.000731486
OAF	chr11:120081746-120100650	siGATA6	siNT	OK	9.42812	12.9938	0.462781	1.68017	0.0041	0.0313525
OAT	chr10:126085871-126107545	siGATA6	siNT	OK	9.0005	16.819	0.902014	3.40158	5e-05	0.000731486
ODAM	chr4:71062243-71070293	siGATA6	siNT	OK	6.60312	13.6452	1.04717	3.42718	5e-05	0.000731486
ODC1	chr2:10580507-10588453	siGATA6	siNT	OK	143.794	194.18	0.43339	2.1628	0.00015	0.001996
ONECUT3	chr19:1753661-1775444	siGATA6	siNT	OK	0.855539	1.76447	1.04433	2.12275	0.0007	0.00747348
OSMR	chr5:38845959-38935743	siGATA6	siNT	OK	4.82298	7.65754	0.666956	2.03481	0.00065	0.00705738
PALM3	chr19:14164178-14169971	siGATA6	siNT	OK	1.26164	2.50324	0.988496	2.59031	5e-05	0.000731486
PAQR8	chr6:52226925-52272575	siGATA6	siNT	OK	13.3521	27.2502	1.0292	4.62291	5e-05	0.000731486
PARD3	chr10:34398487-35104253	siGATA6	siNT	OK	11.1297	18.9334	0.766521	3.15421	5e-05	0.000731486
PARD6B	chr20:49348080-49370278	siGATA6	siNT	OK	2.00832	2.79682	0.477796	1.56316	0.00705	0.0482863
PARP12	chr7:139723548-139763521	siGATA6	siNT	OK	3.09376	5.00864	0.695058	2.40125	5e-05	0.000731486
PARP16	chr15:65550436-65579018	siGATA6	siNT	OK	8.37867	14.0803	0.748886	2.86	5e-05	0.000731486
PARP4	chr13:24995068-25086948	siGATA6	siNT	OK	25.7134	37.4063	0.54076	2.58767	5e-05	0.000731486
PCDH7	chr4:30722029-31148423	siGATA6	siNT	OK	13.7738	18.1839	0.400744	1.63713	0.00415	0.0316404
PCDH9	chr13:66876965-67804468	siGATA6	siNT	OK	0.227651	1.45734	2.67844	6.13785	5e-05	0.000731486
PCSK5	chr9:78505559-78977255	siGATA6	siNT	OK	1.05871	6.84532	2.6928	7.46786	5e-05	0.000731486
PCSK6	chr15:101844132-102030187	siGATA6	siNT	OK	12.0528	20.4441	0.762313	3.29599	5e-05	0.000731486
PCSK7	chr11:117075787-117102811	siGATA6	siNT	OK	25.6954	34.5895	0.428827	1.95725	0.0006	0.0066155
PCYT2	chr17:79860071-79869340	siGATA6	siNT	OK	36.2988	54.6711	0.590859	2.74353	5e-05	0.000731486
PDE8A	chr15:85523743-85682376	siGATA6	siNT	OK	2.8923	4.02969	0.478452	1.62355	0.00455	0.034141
PDE9A	chr21:44073861-44195618	siGATA6	siNT	OK	7.59885	11.3498	0.578818	2.03775	0.0002	0.00257825
PDIA4	chr7:148700153-148725782	siGATA6	siNT	OK	219.737	334.59	0.606615	3.14214	5e-05	0.000731486
PDIA6	chr2:10861774-10952960	siGATA6	siNT	OK	247.066	326.642	0.402812	2.07297	0.00055	0.00615433
PDK1	chr2:173420778-173463862	siGATA6	siNT	OK	2.26712	4.4361	0.968427	3.31838	5e-05	0.000731486
PDX1	chr13:28494167-28500451	siGATA6	siNT	OK	6.82205	11.5268	0.756711	2.80506	5e-05	0.000731486
PEBP1	chr12:118573869-118583390	siGATA6	siNT	OK	76.0923	111.473	0.550869	2.56808	5e-05	0.000731486
PEG10	chr7:94285636-94299006	siGATA6	siNT	OK	6.29071	10.3088	0.712584	3.0282	5e-05	0.000731486
PGC	chr6:41704448-41715139	siGATA6	siNT	OK	4.92338	24.6849	2.32591	7.73142	5e-05	0.000731486
PGM1	chr1:64058946-64125916	siGATA6	siNT	OK	4.22439	5.79831	0.456888	1.52446	0.0072	0.0490773
PHKB	chr16:47495209-47735434	siGATA6	siNT	OK	8.69479	11.5665	0.411728	1.76142	0.0024	0.0203594
PI4KA	chr22:21061978-21213100	siGATA6	siNT	OK	12.2818	18.7093	0.607239	2.68706	5e-05	0.000731486
PID1	chr2:229888688-230136057	siGATA6	siNT	OK	1.76458	5.12897	1.53934	4.62688	5e-05	0.000731486
PIEZO2	chr18:10670243-11148761	siGATA6	siNT	OK	1.90249	4.0965	1.10651	4.23811	5e-05	0.000731486
PIK3AP1	chr10:98353068-98480279	siGATA6	siNT	OK	7.41744	14.6251	0.979455	4.10395	5e-05	0.000731486
PIK3C2A	chr11:17108123-17191354	siGATA6	siNT	OK	7.32282	10.7426	0.552874	2.40814	5e-05	0.000731486
PIK3R1	chr5:67511583-67597649	siGATA6	siNT	OK	4.16172	6.62952	0.671725	2.69144	5e-05	0.000731486
PIM1	chr6:37137921-37143204	siGATA6	siNT	OK	13.7289	22.9335	0.740244	3.06975	5e-05	0.000731486
PIP5K1B	chr9:71320615-71624091	siGATA6	siNT	OK	26.6068	49.3436	0.891068	3.61654	5e-05	0.000731486
PKDCC	chr2:42275160-42285668	siGATA6	siNT	OK	11.3813	30.4481	1.41969	5.8157	5e-05	0.000731486
PKM	chr15:72491369-72523727	siGATA6	siNT	OK	1342.4	2017.32	0.587624	3.03045	5e-05	0.000731486
PLA2G16	chr11:63341943-63381941	siGATA6	siNT	OK	19.4417	27.1233	0.480377	1.80876	0.00115	0.0112204
PLA2G2A	chr1:20301923-20306932	siGATA6	siNT	OK	135.179	441.583	1.70782	8.11268	5e-05	0.000731486
PLA2G4A	chr1:186798031-186958113	siGATA6	siNT	OK	12.3936	17.4632	0.494719	2.01842	0.0002	0.00257825
PLA2G4F	chr15:42433331-42448839	siGATA6	siNT	OK	6.25999	10.9456	0.806123	3.11895	5e-05	0.000731486
PLAC8	chr4:84011210-84035911	siGATA6	siNT	OK	0.590416	9.96555	4.07715	7.95163	5e-05	0.000731486
PLAUR	chr19:44150246-44174498	siGATA6	siNT	OK	51.5673	97.8285	0.923799	4.20164	5e-05	0.000731486
PLB1	chr2:28718937-28866653	siGATA6	siNT	OK	0.573062	3.01987	2.39772	6.84684	5e-05	0.000731486
PLCB4	chr20:9049700-9461462	siGATA6	siNT	OK	2.53227	4.08522	0.689983	2.45286	5e-05	0.000731486
PLCE1	chr10:95753745-96088148	siGATA6	siNT	OK	2.98059	4.73699	0.668371	2.51241	5e-05	0.000731486
PLCG2	chr16:81812898-81991899	siGATA6	siNT	OK	1.05558	1.73791	0.719323	2.08384	0.0004	0.00473235
PLD1	chr3:171318194-171528284	siGATA6	siNT	OK	1.97864	2.97249	0.587162	2.02818	0.0005	0.00567924
PLEK2	chr14:67853699-67878828	siGATA6	siNT	OK	18.3956	27.2282	0.565741	2.20623	0.00015	0.001996
PLLP	chr16:57290008-57318584	siGATA6	siNT	OK	27.2212	63.7872	1.22854	5.22491	5e-05	0.000731486
PLOD3	chr7:100849257-100867471	siGATA6	siNT	OK	31.9552	51.0429	0.675661	2.53302	5e-05	0.000731486
PLS1	chr3:142315228-142432505	siGATA6	siNT	OK	30.1161	43.901	0.54372	2.52774	5e-05	0.000731486
PLSCR4	chr3:145910123-145968966	siGATA6	siNT	OK	0.532121	1.28225	1.26885	2.95727	5e-05	0.000731486
PMEL	chr12:56347888-56360496	siGATA6	siNT	OK	0.657479	1.20938	0.879249	1.77547	0.003	0.0244761
POF1B	chrX:84532394-84634748	siGATA6	siNT	OK	41.1447	56.8847	0.467333	2.24601	0.00015	0.001996
PPFIBP2	chr11:7534995-7674996	siGATA6	siNT	OK	31.1205	41.1329	0.402425	1.835	0.00125	0.0120673
PPP1R12B	chr1:202317829-202557697	siGATA6	siNT	OK	0.744665	1.15951	0.638851	1.58334	0.0056	0.0402502
PPP1R2	chr3:195241220-195270224	siGATA6	siNT	OK	16.4195	22.3571	0.445318	1.92749	0.0009	0.00913632
PPP1R9A	chr7:94536948-94925727	siGATA6	siNT	OK	0.78912	1.70355	1.11023	3.65603	5e-05	0.000731486
PRDX1	chr1:45965855-45988562	siGATA6	siNT	OK	601.03	875.482	0.542641	2.7636	5e-05	0.000731486
PRKCI	chr3:169940219-170023770	siGATA6	siNT	OK	12.8074	26.7316	1.06157	4.73546	5e-05	0.000731486
PROS1	chr3:93591880-93692934	siGATA6	siNT	OK	1.36104	2.36346	0.796191	2.33339	0.0001	0.00138839
PRSS1	chr7:142457318-142460927	siGATA6	siNT	OK	1.60648	5.97178	1.89426	3.94983	5e-05	0.000731486
PRSS12	chr4:119201192-119273922	siGATA6	siNT	OK	14.8424	25.2385	0.765906	3.44179	5e-05	0.000731486
PRSS3	chr9:33750463-33799229	siGATA6	siNT	OK	236.834	500.818	1.08041	5.24294	5e-05	0.000731486
PSAPL1	chr4:7194373-7744564	siGATA6	siNT	OK	2.73772	35.7295	3.70607	14.4694	5e-05	0.000731486
PSEN2	chr1:227058272-227083804	siGATA6	siNT	OK	14.7028	19.4915	0.406752	1.6385	0.0034	0.0271682
PSMD1	chr2:231921577-232037540	siGATA6	siNT	OK	44.7941	60.672	0.437722	2.09644	0.0003	0.00369971
PTGR1	chr9:114287446-114362135	siGATA6	siNT	OK	277.658	612.93	1.14241	5.79671	5e-05	0.000731486
PTK2B	chr8:27168998-27316908	siGATA6	siNT	OK	12.2744	16.9849	0.468601	1.98602	0.0008	0.00835302
PTPN12	chr7:77166772-77269388	siGATA6	siNT	OK	24.378	33.2114	0.446099	1.98906	0.0005	0.00567924
PTPRB	chr12:70910631-71031220	siGATA6	siNT	OK	1.77605	3.40573	0.939288	3.61298	5e-05	0.000731486
PTPRF	chr1:43996546-44089343	siGATA6	siNT	OK	29.7032	41.011	0.465394	2.31006	5e-05	0.000731486
PTPRH	chr19:55692614-55720874	siGATA6	siNT	OK	11.5882	21.1404	0.867341	3.73122	5e-05	0.000731486
PTPRN2	chr7:157331749-158380482	siGATA6	siNT	OK	1.70893	3.76587	1.13989	3.71374	5e-05	0.000731486
PTTG1IP	chr21:46269499-46293818	siGATA6	siNT	OK	119.717	169.139	0.498584	2.51728	5e-05	0.000731486
PVRL2	chr19:45349392-45392485	siGATA6	siNT	OK	163.999	214.328	0.386132	1.93114	0.0008	0.00835302
PVT1	chr8:128902873-129113499	siGATA6	siNT	OK	4.82749	6.93184	0.521964	1.66233	0.00405	0.0310443
PYGO1	chr15:55838220-55881050	siGATA6	siNT	OK	0.373247	1.31967	1.82198	2.62443	5e-05	0.000731486
QSOX1	chr1:180123967-180169859	siGATA6	siNT	OK	132.425	253.009	0.934014	4.39644	5e-05	0.000731486
QSOX2	chr9:139098181-139137687	siGATA6	siNT	OK	17.6071	23.0811	0.390558	1.76724	0.0018	0.0161924
RAB27A	chr15:55495163-55582013	siGATA6	siNT	OK	5.40349	7.86951	0.542383	2.0278	0.0005	0.00567924
RAB37	chr17:72667255-72743474	siGATA6	siNT	OK	6.72046	14.1735	1.07657	3.97986	5e-05	0.000731486
RAB3B	chr1:52373627-52456436	siGATA6	siNT	OK	1.82398	2.75181	0.593296	2.30411	0.0001	0.00138839
RAB8B	chr15:63481727-63559973	siGATA6	siNT	OK	3.32803	4.68621	0.493754	1.7798	0.0019	0.0169255
RALGAPA2	chr20:20370271-20693266	siGATA6	siNT	OK	7.40156	13.8943	0.908593	4.12083	5e-05	0.000731486
RALGPS1	chr9:129677052-129985445	siGATA6	siNT	OK	10.6482	15.5959	0.550564	1.98912	0.00065	0.00705738
RALYL	chr8:85095452-85834078	siGATA6	siNT	OK	2.22926	12.1861	2.4506	7.66744	5e-05	0.000731486
RAP1GAP	chr1:21922707-21995856	siGATA6	siNT	OK	60.7639	92.9902	0.613865	3.03405	5e-05	0.000731486
RAP2A	chr13:98086474-98120252	siGATA6	siNT	OK	4.41004	6.21257	0.494399	1.8324	0.00175	0.0158204
RAPGEF5	chr7:22157907-22396533	siGATA6	siNT	OK	0.703495	1.73891	1.30557	3.9375	5e-05	0.000731486
RARRES1	chr3:158414896-158450275	siGATA6	siNT	OK	1.40131	3.57203	1.34997	2.74453	5e-05	0.000731486
RASA3	chr13:114747193-114898095	siGATA6	siNT	OK	2.889	4.23899	0.55315	1.91167	0.00105	0.0104194
RCN3	chr19:50030874-50046890	siGATA6	siNT	OK	7.84305	12.0757	0.622614	2.21113	0.0001	0.00138839
REG4	chr1:120336640-120354203	siGATA6	siNT	OK	84.6428	1673.72	4.30552	20.8824	5e-05	0.000731486
REPS2	chrX:16964813-17171403	siGATA6	siNT	OK	1.14874	1.90179	0.727307	2.42347	5e-05	0.000731486
RETSAT	chr2:85569077-85581821	siGATA6	siNT	OK	17.0412	28.1499	0.724103	3.17451	5e-05	0.000731486
RGS5	chr1:163112088-163291581	siGATA6	siNT	OK	4.61454	70.548	3.93435	12.8714	5e-05	0.000731486
RHOBTB3	chr5:95066849-95132071	siGATA6	siNT	OK	2.97842	5.81151	0.964367	3.59317	5e-05	0.000731486
RILP	chr17:1549444-1553392	siGATA6	siNT	OK	4.65577	7.35754	0.660204	2.12127	0.00015	0.001996
RIOK3	chr18:21032786-21063099	siGATA6	siNT	OK	13.71	18.5891	0.439225	1.9024	0.00115	0.0112204
RNASE1	chr14:21269514-21271036	siGATA6	siNT	OK	7.39202	18.3401	1.31096	4.00134	5e-05	0.000731486
RNF125	chr18:29598444-29653154	siGATA6	siNT	OK	1.40184	1.98616	0.502662	1.61591	0.00575	0.0410976
RNF128	chrX:105937067-106040246	siGATA6	siNT	OK	19.3777	52.697	1.44332	6.43579	5e-05	0.000731486
RNPEP	chr1:201951765-201975275	siGATA6	siNT	OK	38.8282	50.6756	0.384187	1.75655	0.00205	0.0179249
RNPEPL1	chr2:241508003-241518149	siGATA6	siNT	OK	31.282	40.7447	0.381276	1.74573	0.0017	0.0154667
ROR1	chr1:64239689-64647179	siGATA6	siNT	OK	2.16969	5.84617	1.43	4.96355	5e-05	0.000731486
RP2	chrX:46696346-46741791	siGATA6	siNT	OK	3.6686	5.67338	0.628979	2.23498	0.0001	0.00138839
RPGR	chrX:38128422-38186788	siGATA6	siNT	OK	0.909696	1.45249	0.67507	1.74269	0.00265	0.0220277
RPN2	chr20:35729628-35870025	siGATA6	siNT	OK	180.272	235.04	0.38273	1.95578	0.00035	0.00425081
RPS6KA2	chr6:166822853-167275771	siGATA6	siNT	OK	2.35554	3.91353	0.732414	2.59958	5e-05	0.000731486
RPS6KA3	chrX:20168028-20284750	siGATA6	siNT	OK	9.59976	13.592	0.501683	2.23162	0.0001	0.00138839
RPS6KA4	chr11:64126624-64139687	siGATA6	siNT	OK	32.7709	46.1465	0.493807	2.29074	5e-05	0.000731486
RSPH1	chr21:43892596-43916401	siGATA6	siNT	OK	8.18353	11.9043	0.540691	1.81516	0.00205	0.0179249
S100P	chr4:6695565-6698897	siGATA6	siNT	OK	867.259	1159.6	0.419097	2.09531	0.00045	0.00522253
SAMD5	chr6:147829827-147891157	siGATA6	siNT	OK	0.629522	2.10063	1.73849	5.14493	5e-05	0.000731486
SCARB1	chr12:125262173-125348519	siGATA6	siNT	OK	26.9979	35.437	0.392406	1.76799	0.0024	0.0203594
SCCPDH	chr1:246887377-246931440	siGATA6	siNT	OK	8.10524	11.1566	0.460965	1.71162	0.0025	0.0210128
SCD	chr10:102106771-102124588	siGATA6	siNT	OK	10.3029	16.4966	0.679125	2.97864	5e-05	0.000731486
SCIN	chr7:12610202-12693228	siGATA6	siNT	OK	1.88364	5.27897	1.48673	4.67503	5e-05	0.000731486
SDCBP	chr8:59465727-59495419	siGATA6	siNT	OK	112.834	147.759	0.389035	1.89769	0.001	0.00995412
SDCCAG8	chr1:243419306-244006886	siGATA6	siNT	OK	7.86841	11.5164	0.549553	2.06842	0.0004	0.00473235
SEC23A	chr14:39501122-39572437	siGATA6	siNT	OK	21.1951	32.6296	0.62245	2.83508	5e-05	0.000731486
SEL1L3	chr4:25749048-25864610	siGATA6	siNT	OK	31.6827	63.1956	0.996127	4.81932	5e-05	0.000731486
SEPT11	chr4:77870894-77959768	siGATA6	siNT	OK	15.5748	27.4432	0.817236	3.77049	5e-05	0.000731486
SEPT9	chr17:75277491-75496678	siGATA6	siNT	OK	159.909	210.349	0.395532	2.04595	0.00055	0.00615433
SERINC2	chr1:31882411-31907527	siGATA6	siNT	OK	108.279	173.773	0.68245	3.35514	5e-05	0.000731486
SERPINB1	chr6:2832565-2842283	siGATA6	siNT	OK	38.7542	65.6154	0.759684	3.54126	5e-05	0.000731486
SERPINB5	chr18:61144143-61172318	siGATA6	siNT	OK	34.5732	46.3214	0.422022	1.92162	0.00075	0.00792795
SERPINB6	chr6:2948392-2972399	siGATA6	siNT	OK	41.1043	67.7903	0.721788	3.15614	5e-05	0.000731486
SGMS1	chr10:52065344-52383737	siGATA6	siNT	OK	5.61039	8.51098	0.601224	2.28726	0.0001	0.00138839
SH3BP4	chr2:235860627-235964358	siGATA6	siNT	OK	24.9193	33.8548	0.442095	2.0946	0.0003	0.00369971
SHH	chr7:155595557-155604967	siGATA6	siNT	OK	3.2905	5.23997	0.671252	1.96296	0.0007	0.00747348
SHISA2	chr13:26618734-26625198	siGATA6	siNT	OK	0.706093	2.10757	1.57765	3.95271	5e-05	0.000731486
SHISA6	chr17:11144739-11467380	siGATA6	siNT	OK	5.10563	10.2954	1.01185	4.23186	5e-05	0.000731486
SIDT2	chr11:117049938-117075508	siGATA6	siNT	OK	11.7861	20.531	0.80071	2.26915	0.0006	0.0066155
SIPA1L1	chr14:71996041-72206120	siGATA6	siNT	OK	5.93732	8.18007	0.462302	1.89537	0.0011	0.01084
SLAIN1	chr13:78271988-78338377	siGATA6	siNT	OK	11.2191	21.3119	0.925706	3.6973	5e-05	0.000731486
SLC12A2	chr5:127419482-127525380	siGATA6	siNT	OK	20.0089	51.7317	1.37041	6.63372	5e-05	0.000731486
SLC12A8	chr3:124801479-124931609	siGATA6	siNT	OK	6.51904	9.48369	0.540789	2.0658	0.00055	0.00615433
SLC15A1	chr13:99336054-99404929	siGATA6	siNT	OK	6.71774	16.1101	1.26192	4.93381	5e-05	0.000731486
SLC17A5	chr6:74303101-74363737	siGATA6	siNT	OK	10.0491	17.8578	0.829485	3.39804	5e-05	0.000731486
SLC1A1	chr9:4490426-4587469	siGATA6	siNT	OK	1.76458	3.27286	0.891224	2.79866	5e-05	0.000731486
SLC22A23	chr6:3269206-3456793	siGATA6	siNT	OK	7.87984	11.2809	0.517646	2.21928	5e-05	0.000731486
SLC28A3	chr9:86890764-86983413	siGATA6	siNT	OK	1.5165	4.9079	1.69436	5.67459	5e-05	0.000731486
SLC2A10	chr20:45338278-45364985	siGATA6	siNT	OK	7.9868	10.8367	0.440239	1.78941	0.00195	0.0172986
SLC35D1	chr1:67465014-67520080	siGATA6	siNT	OK	4.12116	8.72196	1.0816	4.35292	5e-05	0.000731486
SLC37A1	chr21:43919741-44001550	siGATA6	siNT	OK	25.5583	35.2336	0.46316	2.09202	0.0004	0.00473235
SLC37A3	chr7:140033551-140098311	siGATA6	siNT	OK	14.7867	22.2897	0.592079	2.55717	5e-05	0.000731486
SLC38A10	chr17:79218798-79269096	siGATA6	siNT	OK	38.2625	50.5461	0.40167	1.87642	0.00135	0.0128773
SLC39A14	chr8:22224761-22291640	siGATA6	siNT	OK	34.3269	46.1467	0.426887	2.0612	0.0002	0.00257825
SLC40A1	chr2:190425315-190445537	siGATA6	siNT	OK	55.6397	120.268	1.11207	5.45392	5e-05	0.000731486
SLC41A2	chr12:105197274-105322472	siGATA6	siNT	OK	2.38717	4.4175	0.88793	2.89052	5e-05	0.000731486
SLC43A2	chr17:1477695-1532130	siGATA6	siNT	OK	8.96404	13.7875	0.621138	2.46015	5e-05	0.000731486
SLC45A4	chr8:142220869-142238673	siGATA6	siNT	OK	14.67	19.3561	0.399915	1.70348	0.0033	0.0265014
SLC5A1	chr22:32439018-32509011	siGATA6	siNT	OK	11.7624	16.5404	0.491808	2.15168	0.0005	0.00567924
SLC6A19	chr5:1201709-1225230	siGATA6	siNT	OK	0.0344479	1.12068	5.02382	5.31293	5e-05	0.000731486
SLC7A2	chr8:17354596-17428077	siGATA6	siNT	OK	1.4895	2.48017	0.735613	2.53341	5e-05	0.000731486
SLC7A7	chr14:23242431-23289020	siGATA6	siNT	OK	59.2059	108.585	0.875017	4.16045	5e-05	0.000731486
SLC9A2	chr2:103236165-103327809	siGATA6	siNT	OK	19.6731	30.6366	0.639033	2.99424	5e-05	0.000731486
SLC9A3	chr5:473333-524549	siGATA6	siNT	OK	7.71674	13.3833	0.794368	3.04522	5e-05	0.000731486
SLC9A7	chrX:46458685-46618607	siGATA6	siNT	OK	0.611323	1.68539	1.46308	4.71591	5e-05	0.000731486
SLCO2B1	chr11:74862031-74917445	siGATA6	siNT	OK	27.9826	42.6931	0.609476	2.85785	5e-05	0.000731486
SLITRK6	chr13:86366921-86373483	siGATA6	siNT	OK	0.791825	1.66974	1.07637	2.91689	5e-05	0.000731486
SMARCA1	chrX:128580477-128657460	siGATA6	siNT	OK	1.63845	2.63486	0.685394	2.15141	0.0004	0.00473235
SMCHD1	chr18:2655885-2805015	siGATA6	siNT	OK	3.46249	4.84341	0.484213	1.9074	0.0009	0.00913632
SMPDL3A	chr6:123109970-123130864	siGATA6	siNT	OK	7.89673	15.0388	0.929366	3.43199	5e-05	0.000731486
SMTNL2	chr17:4487275-4511614	siGATA6	siNT	OK	0.251619	1.08661	2.11052	3.14017	5e-05	0.000731486
SMYD2	chr1:214454564-214510477	siGATA6	siNT	OK	9.59192	13.7572	0.520298	1.86436	0.00145	0.0135981
SNAI3	chr16:88729780-88753594	siGATA6	siNT	OK	0.435659	1.28368	1.55901	2.07539	0.0067	0.046587
SNTA1	chr20:31995762-32031698	siGATA6	siNT	OK	1.79421	4.15108	1.21014	3.50586	5e-05	0.000731486
SNX7	chr1:99127235-99226056	siGATA6	siNT	OK	7.27309	11.471	0.657355	2.27636	5e-05	0.000731486
SOS1	chr2:39208689-39347604	siGATA6	siNT	OK	7.70458	17.1914	1.1579	5.20511	5e-05	0.000731486
SOX13	chr1:204042245-204096871	siGATA6	siNT	OK	10.502	14.4074	0.456141	1.91144	0.0011	0.01084
SPATS2L	chr2:201170603-201346986	siGATA6	siNT	OK	34.2638	53.5542	0.644315	3.16774	5e-05	0.000731486
SPDEF	chr6:34505578-34524110	siGATA6	siNT	OK	46.1182	101.367	1.13619	5.28956	5e-05	0.000731486
SPINK4	chr9:33240195-33248565	siGATA6	siNT	OK	6.67799	93.495	3.8074	9.22949	5e-05	0.000731486
SPIRE2	chr16:89894906-89937727	siGATA6	siNT	OK	9.80491	14.3697	0.551458	2.22746	5e-05	0.000731486
SPRED1	chr15:38545051-38649450	siGATA6	siNT	OK	7.70252	11.0094	0.515328	2.24287	5e-05	0.000731486
SPRY4	chr5:141689991-141704620	siGATA6	siNT	OK	3.80258	6.54117	0.782569	2.95765	5e-05	0.000731486
SPTAN1	chr9:131314836-131419129	siGATA6	siNT	OK	37.4543	60.2852	0.686674	2.59103	5e-05	0.000731486
SPTBN1	chr2:54683453-54898583	siGATA6	siNT	OK	48.4798	78.9002	0.702645	3.58371	5e-05	0.000731486
SPTLC3	chr20:12989626-13147411	siGATA6	siNT	OK	0.263436	1.66302	2.65828	5.5342	5e-05	0.000731486
SRD5A3	chr4:56212387-56251747	siGATA6	siNT	OK	11.0917	14.8773	0.423641	1.78515	0.0017	0.0154667
SRI	chr7:87834431-87856308	siGATA6	siNT	OK	71.8899	115.476	0.683734	2.90851	5e-05	0.000731486
SSBP3	chr1:54692194-54872092	siGATA6	siNT	OK	13.7817	19.2843	0.484673	1.91202	0.001	0.00995412
SSTR1	chr14:38677203-38682268	siGATA6	siNT	OK	2.8868	4.98674	0.788628	2.77056	5e-05	0.000731486
ST3GAL2	chr16:70413337-70472991	siGATA6	siNT	OK	1.93529	5.8744	1.60189	5.50519	5e-05	0.000731486
ST3GAL5	chr2:86066270-86116157	siGATA6	siNT	OK	1.24751	2.75606	1.14355	3.01398	5e-05	0.000731486
ST5	chr11:8714898-8932498	siGATA6	siNT	OK	5.23255	9.90047	0.919984	3.36918	5e-05	0.000731486
ST6GALNAC1	chr17:74620844-74639894	siGATA6	siNT	OK	19.4097	41.6954	1.10311	4.80995	5e-05	0.000731486
ST6GALNAC2	chr17:74561460-74582145	siGATA6	siNT	OK	0.787636	1.60727	1.02901	2.31213	0.0001	0.00138839
STAMBPL1	chr10:90639943-90683259	siGATA6	siNT	OK	4.99174	8.67991	0.798136	2.70219	5e-05	0.000731486
STK17B	chr2:196998306-197036336	siGATA6	siNT	OK	5.2375	8.75507	0.74124	2.96667	5e-05	0.000731486
STK39	chr2:168810529-169104105	siGATA6	siNT	OK	14.8593	19.4851	0.391004	1.66237	0.00415	0.0316404
STT3B	chr3:31574490-31677556	siGATA6	siNT	OK	46.6096	68.968	0.5653	2.62768	5e-05	0.000731486
STX6	chr1:180942175-180992046	siGATA6	siNT	OK	8.505	12.0487	0.502498	2.08559	0.00025	0.00313443
STXBP6	chr14:25281305-25519095	siGATA6	siNT	OK	2.75591	6.11309	1.14937	3.469	5e-05	0.000731486
SULT1B1	chr4:70592685-70626430	siGATA6	siNT	OK	2.30407	5.10724	1.14836	2.97604	5e-05	0.000731486
SYNPO	chr5:149980641-150038792	siGATA6	siNT	OK	3.79393	8.49366	1.16269	4.44335	5e-05	0.000731486
SYT8	chr11:1855673-1858750	siGATA6	siNT	OK	5.54857	9.13076	0.718619	2.28257	0.00015	0.001996
SYTL2	chr11:85405264-85522178	siGATA6	siNT	OK	38.7651	52.3899	0.434528	2.08676	0.00015	0.001996
SYTL4	chrX:99929488-99987135	siGATA6	siNT	OK	4.85012	8.83387	0.865024	3.24921	5e-05	0.000731486
SYTL5	chrX:37865834-37988073	siGATA6	siNT	OK	1.59716	2.57089	0.686754	2.20535	0.0001	0.00138839
TACC1	chr8:38585703-38710546	siGATA6	siNT	OK	5.23525	10.4983	1.00383	4.28276	5e-05	0.000731486
TBC1D4	chr13:75858808-76056250	siGATA6	siNT	OK	11.3729	20.8426	0.87393	3.96644	5e-05	0.000731486
TBX3	chr12:115108058-115121969	siGATA6	siNT	OK	11.827	21.53	0.864267	3.82241	5e-05	0.000731486
TCEA3	chr1:23707554-23751261	siGATA6	siNT	OK	7.99231	10.9406	0.453001	1.54998	0.0063	0.044214
TCN1	chr11:59620280-59634041	siGATA6	siNT	OK	56.012	77.1085	0.461156	2.08664	0.0002	0.00257825
TECPR1	chr7:97844754-97881563	siGATA6	siNT	OK	3.41706	4.57387	0.420657	1.56972	0.00685	0.0473216
TEP1	chr14:20833825-20881579	siGATA6	siNT	OK	0.992503	1.53382	0.627985	2.13864	0.0001	0.00138839
TERF1	chr8:73921096-73959987	siGATA6	siNT	OK	12.4113	18.4184	0.56949	2.34157	5e-05	0.000731486
TESC	chr12:117476727-117537251	siGATA6	siNT	OK	242.916	385.689	0.666978	3.26682	5e-05	0.000731486
TFF1	chr21:43782390-43786644	siGATA6	siNT	OK	637.14	2030.1	1.67187	8.3391	5e-05	0.000731486
TFF2	chr21:43766466-43771208	siGATA6	siNT	OK	12.3028	28.3629	1.20502	3.87333	5e-05	0.000731486
TGOLN2	chr2:85545140-85555419	siGATA6	siNT	OK	32.9122	51.2479	0.638871	3.16977	5e-05	0.000731486
THBD	chr20:23026269-23030301	siGATA6	siNT	OK	11.677	20.9295	0.841865	3.63857	5e-05	0.000731486
TLE4	chr9:82186877-82341656	siGATA6	siNT	OK	3.79727	5.49265	0.53254	1.97121	0.0008	0.00835302
TM4SF5	chr17:4675186-4686506	siGATA6	siNT	OK	8.37578	25.1285	1.58503	4.85703	5e-05	0.000731486
TM9SF3	chr10:98277866-98346809	siGATA6	siNT	OK	28.411	37.5862	0.403754	1.89388	0.00095	0.00956802
TMBIM1	chr2:219135114-219211516	siGATA6	siNT	OK	166.131	244.891	0.559814	2.42774	5e-05	0.000731486
TMC5	chr16:19422056-19510434	siGATA6	siNT	OK	7.56945	15.1758	1.00351	4.2512	5e-05	0.000731486
TMC6	chr17:76108998-76139049	siGATA6	siNT	OK	28.0114	36.4346	0.379295	1.63424	0.00395	0.030387
TMCC3	chr12:94960899-95044324	siGATA6	siNT	OK	0.271486	1.17995	2.11977	5.09028	5e-05	0.000731486
TMEM131	chr2:98372800-98612354	siGATA6	siNT	OK	6.89238	9.20079	0.416754	1.76622	0.00175	0.0158204
TMEM144	chr4:159131400-159176439	siGATA6	siNT	OK	3.86988	5.66487	0.549756	1.90834	0.0014	0.0132359
TMEM181	chr6:158957467-159056467	siGATA6	siNT	OK	5.69308	8.32992	0.549093	2.21259	0.00015	0.001996
TMEM2	chr9:74298281-74383800	siGATA6	siNT	OK	97.1014	133.26	0.456674	2.36457	5e-05	0.000731486
TMEM229B	chr14:67936982-67982021	siGATA6	siNT	OK	3.19193	4.48603	0.49101	1.70714	0.00345	0.027499
TMEM246	chr9:104237607-104249475	siGATA6	siNT	OK	29.9831	47.1354	0.65266	2.87809	5e-05	0.000731486
TMEM38A	chr19:16771937-16799816	siGATA6	siNT	OK	4.89298	10.0116	1.03289	3.36088	5e-05	0.000731486
TMEM45B	chr11:129685740-129729898	siGATA6	siNT	OK	118.946	208.41	0.809116	4.04244	5e-05	0.000731486
TMEM63B	chr6:44095375-44123256	siGATA6	siNT	OK	59.8701	85.0315	0.506162	2.46517	5e-05	0.000731486
TMEM87B	chr2:112812799-112876895	siGATA6	siNT	OK	8.9275	11.9851	0.42491	1.7818	0.00165	0.0150439
TMEM97	chr17:26646120-26662515	siGATA6	siNT	OK	60.1705	80.8951	0.426998	1.94609	0.00055	0.00615433
TMPRSS2	chr21:42836477-42880085	siGATA6	siNT	OK	15.3129	20.8355	0.444299	1.9076	0.0007	0.00747348
TNFRSF11A	chr18:59992519-60054943	siGATA6	siNT	OK	2.45168	4.66112	0.926905	3.2241	5e-05	0.000731486
TNFRSF19	chr13:24144508-24250244	siGATA6	siNT	OK	3.83617	7.70762	1.00662	2.33263	0.00025	0.00313443
TNIK	chr3:170780291-171178197	siGATA6	siNT	OK	7.19613	19.2725	1.42125	3.73668	5e-05	0.000731486
TNS4	chr17:38632079-38657854	siGATA6	siNT	OK	45.5225	94.0298	1.04654	5.13352	5e-05	0.000731486
TP53I11	chr11:44785975-44972857	siGATA6	siNT	OK	23.7232	47.0208	0.987	4.54996	5e-05	0.000731486
TRAM2	chr6:52362199-52441862	siGATA6	siNT	OK	8.40316	11.4005	0.440095	1.92865	0.00045	0.00522253
TRERF1	chr6:42192668-42419783	siGATA6	siNT	OK	2.10356	3.82488	0.862584	3.18059	5e-05	0.000731486
TRIM24	chr7:138145078-138270332	siGATA6	siNT	OK	20.4497	35.7568	0.806139	3.69281	5e-05	0.000731486
TRIM3	chr11:6469842-6495689	siGATA6	siNT	OK	4.05545	6.03359	0.573152	1.96195	0.0006	0.0066155
TRNP1	chr1:27320194-27327377	siGATA6	siNT	OK	57.7657	122.677	1.08658	5.14124	5e-05	0.000731486
TRPM4	chr19:49661015-49715098	siGATA6	siNT	OK	26.1087	35.4323	0.440533	2.0291	0.0002	0.00257825
TRPM7	chr15:50849351-50979012	siGATA6	siNT	OK	2.59026	3.71811	0.521473	2.02154	0.0005	0.00567924
TSEN2	chr3:12525930-12574820	siGATA6	siNT	OK	8.47622	15.4	0.861433	3.1934	5e-05	0.000731486
TSPAN13	chr7:16793350-16824161	siGATA6	siNT	OK	47.8256	64.1863	0.424481	1.93441	0.0008	0.00835302
TSPAN3	chr15:77336359-77363570	siGATA6	siNT	OK	65.4867	87.1141	0.411704	2.0328	0.0005	0.00567924
TSPAN8	chr12:71518876-71551779	siGATA6	siNT	OK	168.62	369.882	1.13329	5.4249	5e-05	0.000731486
TSTA3	chr8:144694787-144699732	siGATA6	siNT	OK	124.468	185.503	0.575672	2.76418	5e-05	0.000731486
TTC13	chr1:231041986-231114618	siGATA6	siNT	OK	14.9031	29.1044	0.965623	4.21406	5e-05	0.000731486
TTC3	chr21:38445570-38575408	siGATA6	siNT	OK	7.69053	10.1293	0.397374	1.737	0.0021	0.0182128
TUBA1C	chr12:49658864-49667113	siGATA6	siNT	OK	1643.38	2333.4	0.505763	2.63194	5e-05	0.000731486
TUBB2A	chr6:3153901-3157783	siGATA6	siNT	OK	2.68953	6.08881	1.17881	3.37498	5e-05	0.000731486
TXNDC5	chr6:7727010-8102828	siGATA6	siNT	OK	97.1251	126.5	0.381222	1.81039	0.0018	0.0161924
UACA	chr15:70946892-71055850	siGATA6	siNT	OK	2.19239	3.17814	0.535681	1.9204	0.0007	0.00747348
UAP1	chr1:162531295-162569633	siGATA6	siNT	OK	26.0601	43.3865	0.735404	3.23912	5e-05	0.000731486
UBB	chr17:16284366-16286054	siGATA6	siNT	OK	1647.43	2228.36	0.435764	2.27239	5e-05	0.000731486
UBR4	chr1:19400999-19536746	siGATA6	siNT	OK	12.9415	18.9467	0.549945	2.70222	5e-05	0.000731486
UGGT1	chr2:128848753-128953249	siGATA6	siNT	OK	6.97268	11.304	0.697052	3.20005	5e-05	0.000731486
UGT1A1	chr2:234526290-234681951	siGATA6	siNT	OK	5.19458	22.2904	2.10135	1.90492	0.0021	0.0182128
UGT1A6	chr2:234526290-234681951	siGATA6	siNT	OK	188.19	431.712	1.19788	6.00434	5e-05	0.000731486
UGT8	chr4:115519610-115598202	siGATA6	siNT	OK	33.5029	57.181	0.77125	3.59001	5e-05	0.000731486
UHRF1	chr19:4909509-4962165	siGATA6	siNT	OK	7.89622	10.3688	0.393018	1.56659	0.0058	0.0414087
UNC13B	chr9:35161988-35405332	siGATA6	siNT	OK	9.81193	13.1442	0.421822	1.85462	0.0014	0.0132359
UNC5CL	chr6:40994639-41006938	siGATA6	siNT	OK	5.56563	23.5692	2.08229	8.16861	5e-05	0.000731486
UNC93A	chr6:167704802-167729502	siGATA6	siNT	OK	0.141286	1.28218	3.18191	4.09124	5e-05	0.000731486
UST	chr6:149068270-149398126	siGATA6	siNT	OK	7.08738	16.0775	1.18172	4.88666	5e-05	0.000731486
VIL1	chr2:219283837-219314248	siGATA6	siNT	OK	85.2366	131.359	0.623975	3.08744	5e-05	0.000731486
VILL	chr3:38035077-38048676	siGATA6	siNT	OK	21.8955	34.4938	0.655702	2.88726	5e-05	0.000731486
VRTN	chr14:74815165-74826711	siGATA6	siNT	OK	0.311928	1.19029	1.93203	4.01773	5e-05	0.000731486
VSIG10	chr12:118501397-118541810	siGATA6	siNT	OK	9.30831	13.6916	0.556704	2.38101	0.0001	0.00138839
VSIG2	chr11:124617369-124622109	siGATA6	siNT	OK	56.3578	86.4496	0.617244	2.69686	5e-05	0.000731486
WDR41	chr5:76728068-76788332	siGATA6	siNT	OK	3.18574	4.6141	0.534422	1.70189	0.00305	0.0248524
WNK2	chr9:95947211-96108696	siGATA6	siNT	OK	4.27172	6.26212	0.551834	2.19123	0.0001	0.00138839
WSCD1	chr17:5973933-6027747	siGATA6	siNT	OK	11.8661	22.2791	0.908848	4.11117	5e-05	0.000731486
WWP1	chr8:87354993-87480178	siGATA6	siNT	OK	19.9782	32.3836	0.696839	3.17123	5e-05	0.000731486
XBP1	chr22:29190547-29196560	siGATA6	siNT	OK	218.44	337.802	0.628943	3.20151	5e-05	0.000731486
XYLT1	chr16:17196180-17564738	siGATA6	siNT	OK	1.57016	2.67496	0.768609	2.7819	5e-05	0.000731486
ZDHHC14	chr6:157802556-158094977	siGATA6	siNT	OK	5.54458	10.4814	0.918675	3.34171	5e-05	0.000731486
ZFPM1	chr16:88520013-88601574	siGATA6	siNT	OK	6.57237	15.7759	1.26324	4.94783	5e-05	0.000731486
ZFYVE28	chr4:2271323-2420370	siGATA6	siNT	OK	0.888674	1.49008	0.74566	1.90251	0.00085	0.00872562
ZMPSTE24	chr1:40723721-40759856	siGATA6	siNT	OK	12.6081	16.9448	0.426491	1.75105	0.00225	0.0193174
ZNF488	chr10:48355088-48373866	siGATA6	siNT	OK	3.75319	5.21121	0.473499	1.65217	0.0044	0.0331906
ZNF792	chr19:35447257-35454953	siGATA6	siNT	OK	2.54365	5.50905	1.1149	3.82651	5e-05	0.000731486

## Sheet: S5D siGATA6 RNAseq +1.3x
gene	locus	sample_1	sample_2	status	value_1	value_2	log2(fold_change)	test_stat	p_value	q_value	Direct targets +1.3x n=327
ZSCAN22	chr19:58838384-58853712	siGATA6	siNT	OK	1.51855	1.00755	-0.591835	-1.69999	0.0034	0.0271682
ZRANB2	chr1:71318035-71546972	siGATA6	siNT	OK	13.9966	10.7044	-0.386872	-1.5484	0.00695	0.0477803
ZNRF3	chr22:29279754-29453476	siGATA6	siNT	OK	9.48355	6.12232	-0.631349	-2.655	5e-05	0.000731486
ZNF703	chr8:37553300-37556396	siGATA6	siNT	OK	108.148	81.8866	-0.401311	-1.93114	0.0008	0.00835302
ZNF608	chr5:123972609-124080805	siGATA6	siNT	OK	2.038	1.0665	-0.934263	-2.90564	5e-05	0.000731486
ZNF367	chr9:99148224-99180669	siGATA6	siNT	OK	37.7835	28.0226	-0.431167	-1.9944	0.0006	0.0066155
ZNF280C	chrX:129336672-129402922	siGATA6	siNT	OK	1.96528	1.16933	-0.749051	-2.25055	5e-05	0.000731486
ZMAT5	chr22:30116343-30162969	siGATA6	siNT	OK	42.0999	31.0184	-0.440693	-1.70744	0.00385	0.0298509
ZKSCAN1	chr7:99613218-99635403	siGATA6	siNT	OK	15.9794	11.3731	-0.490582	-2.16569	5e-05	0.000731486
ZFYVE26	chr14:68213236-68283306	siGATA6	siNT	OK	2.9277	2.01164	-0.541394	-2.03164	0.0004	0.00473235
ZFYVE1	chr14:73436158-73493920	siGATA6	siNT	OK	3.32926	2.25302	-0.563342	-1.87545	0.0015	0.0139953
ZER1	chr9:131486740-131534213	siGATA6	siNT	OK	18.4034	13.6648	-0.429512	-1.86615	0.0014	0.0132359
ZBTB7C	chr18:45553638-45663680	siGATA6	siNT	OK	12.9161	9.37867	-0.461713	-1.91273	0.001	0.00995412
XPA	chr9:100437190-100459691	siGATA6	siNT	OK	20.9449	15.445	-0.439464	-1.6603	0.0042	0.0319644
WNT7B	chr22:46316247-46373008	siGATA6	siNT	OK	12.0816	7.65746	-0.657869	-2.64846	5e-05	0.000731486
WEE1	chr11:9595227-9611313	siGATA6	siNT	OK	18.2539	12.3027	-0.569227	-2.38644	5e-05	0.000731486
WBSCR27	chr7:73248920-73256855	siGATA6	siNT	OK	13.1845	7.16701	-0.879402	-2.69772	5e-05	0.000731486
VSNL1	chr2:17721806-17837706	siGATA6	siNT	OK	3.59922	1.10716	-1.70082	-4.31714	5e-05	0.000731486
VGLL1	chrX:135614310-135638966	siGATA6	siNT	OK	6.1425	2.53346	-1.27772	-3.37266	5e-05	0.000731486
VANGL1	chr1:116184573-116240845	siGATA6	siNT	OK	18.4343	14.1433	-0.382279	-1.81928	0.00085	0.00872562
USP53	chr4:120133781-120216673	siGATA6	siNT	OK	6.27371	4.38697	-0.516093	-2.00795	0.00065	0.00705738
UCP2	chr11:73685715-73693889	siGATA6	siNT	OK	9.12803	5.79447	-0.655627	-2.15595	0.0003	0.00369971
UCA1	chr19:15939756-15947131	siGATA6	siNT	OK	8.12279	4.19739	-0.952485	-3.22122	5e-05	0.000731486
TXNIP	chr1:145438461-145442628	siGATA6	siNT	OK	106.898	71.1141	-0.588027	-2.89141	5e-05	0.000731486
TTC9	chr14:71108503-71142077	siGATA6	siNT	OK	10.521	6.78122	-0.633655	-2.60994	5e-05	0.000731486
TTC32	chr2:20096513-20101744	siGATA6	siNT	OK	3.40388	2.02431	-0.749748	-1.57439	0.00665	0.0463148
TSPAN5	chr4:99391517-99579812	siGATA6	siNT	OK	18.478	9.50877	-0.958479	-3.93883	5e-05	0.000731486
TSC22D3	chrX:106956451-107019017	siGATA6	siNT	OK	5.35144	3.15292	-0.763239	-2.3397	5e-05	0.000731486
TRIM29	chr11:119981993-120008863	siGATA6	siNT	OK	61.3732	29.9152	-1.03673	-4.8148	5e-05	0.000731486
TRAF6	chr11:36505316-36531863	siGATA6	siNT	OK	2.61757	1.81647	-0.527088	-1.87457	0.00135	0.0128773
TPRXL	chr3:13978806-14107481	siGATA6	siNT	OK	1.98155	1.04214	-0.927081	-2.30934	0.0002	0.00257825
TPRA1	chr3:127291906-127309602	siGATA6	siNT	OK	29.0672	20.8594	-0.478693	-1.98126	0.0006	0.0066155
TPPP3	chr16:67423711-67427421	siGATA6	siNT	OK	48.2369	32.0651	-0.589132	-2.35855	5e-05	0.000731486
TNRC6B	chr22:40440820-40731812	siGATA6	siNT	OK	2.67863	2.03193	-0.398644	-1.63466	0.0049	0.0361735
TNFAIP3	chr6:138144806-138204451	siGATA6	siNT	OK	2.69994	1.70208	-0.665627	-2.14291	0.0002	0.00257825
TMEM64	chr8:91634222-91658133	siGATA6	siNT	OK	7.00521	4.48066	-0.644718	-2.46304	5e-05	0.000731486
TMEM123	chr11:102267055-102323775	siGATA6	siNT	OK	159.603	113.113	-0.496723	-2.50216	5e-05	0.000731486
TMEM116	chr12:112369086-112451023	siGATA6	siNT	OK	9.03215	5.61835	-0.684922	-2.21598	0.0002	0.00257825
TMCC1	chr3:129366634-129612419	siGATA6	siNT	OK	5.08303	3.24294	-0.648386	-2.44811	5e-05	0.000731486
TLE1	chr9:84198597-84303596	siGATA6	siNT	OK	18.1162	13.4753	-0.426962	-1.79492	0.00215	0.0185584
TIPARP	chr3:156390959-156424557	siGATA6	siNT	OK	33.1013	24.5061	-0.433744	-1.97829	0.0005	0.00567924
THEM4	chr1:151843342-151882361	siGATA6	siNT	OK	3.7747	2.65152	-0.50954	-1.79493	0.00195	0.0172986
TGM2	chr20:36756863-36793700	siGATA6	siNT	OK	4.89007	3.4111	-0.519619	-1.62565	0.00535	0.038758
TGIF1	chr18:3412071-3458406	siGATA6	siNT	OK	61.5898	42.0454	-0.550744	-2.42019	5e-05	0.000731486
TFAP2C	chr20:55204357-55214338	siGATA6	siNT	OK	8.53747	6.0263	-0.502536	-1.83103	0.0014	0.0132359
TDRKH	chr1:151744040-151763010	siGATA6	siNT	OK	9.70611	7.18875	-0.433153	-1.60383	0.00595	0.0422206
TBL1X	chrX:9431334-9687780	siGATA6	siNT	OK	9.95953	7.53277	-0.402898	-1.67452	0.0036	0.0283243
TBC1D2	chr9:100961279-101018003	siGATA6	siNT	OK	6.4868	4.75855	-0.446986	-1.58558	0.0057	0.0408314
TAGLN	chr11:117049938-117075508	siGATA6	siNT	OK	130.439	31.6192	-2.04451	-5.92718	5e-05	0.000731486
SYF2	chr1:25548766-25559013	siGATA6	siNT	OK	27.7007	19.3782	-0.515486	-2.08178	0.0004	0.00473235
SYBU	chr8:110586404-110704020	siGATA6	siNT	OK	6.8826	3.45073	-0.996054	-3.34121	5e-05	0.000731486
SUOX	chr12:56391042-56399309	siGATA6	siNT	OK	10.7596	7.94336	-0.437803	-1.58979	0.00525	0.0381415
STEAP4	chr7:87905743-87936228	siGATA6	siNT	OK	1.87542	1.06714	-0.813469	-2.39734	0.0001	0.00138839
STEAP1	chr7:89783688-89794141	siGATA6	siNT	OK	5.39041	2.31454	-1.21967	-3.2058	5e-05	0.000731486
ST6GAL1	chr3:186648314-186796341	siGATA6	siNT	OK	4.94683	2.72477	-0.860371	-2.96945	5e-05	0.000731486
SRP9	chr1:225965514-225978168	siGATA6	siNT	OK	54.2535	41.4407	-0.388668	-1.57751	0.00605	0.0427406
SRGAP1	chr12:64238540-64541613	siGATA6	siNT	OK	3.42926	2.51376	-0.448047	-1.70089	0.0031	0.0252116
SQRDL	chr15:45923345-45983492	siGATA6	siNT	OK	107.399	77.1584	-0.477091	-2.26253	0.0001	0.00138839
SPRR3	chr1:152974222-152976332	siGATA6	siNT	OK	20.937	14.702	-0.510038	-1.74546	0.00235	0.0200683
SPRR1B	chr1:153003678-153005376	siGATA6	siNT	OK	97.6032	52.3346	-0.899165	-3.54413	5e-05	0.000731486
SPON2	chr4:1160720-1202750	siGATA6	siNT	OK	13.8362	9.70652	-0.511423	-1.86999	0.0008	0.00835302
SPNS2	chr17:4402128-4458681	siGATA6	siNT	OK	46.0248	28.0078	-0.716584	-2.98042	5e-05	0.000731486
SPIRE1	chr18:12446510-12657912	siGATA6	siNT	OK	5.6241	3.27991	-0.777967	-2.89228	5e-05	0.000731486
SP6	chr17:45922279-45933240	siGATA6	siNT	OK	5.07392	2.89966	-0.807214	-2.78038	5e-05	0.000731486
SOX2	chr3:180774467-181460013	siGATA6	siNT	OK	13.9258	6.86084	-1.0213	-3.8145	5e-05	0.000731486
SOCS5	chr2:46926098-46989927	siGATA6	siNT	OK	7.9301	5.57067	-0.509488	-1.98989	0.00035	0.00425081
SNTB1	chr8:121547984-121824309	siGATA6	siNT	OK	55.0624	42.1271	-0.38632	-1.89599	0.00085	0.00872562
SNAI1	chr20:48599512-48605420	siGATA6	siNT	OK	3.43486	1.77636	-0.951328	-2.48072	5e-05	0.000731486
SMAD7	chr18:46446222-46477081	siGATA6	siNT	OK	24.285	15.5894	-0.639494	-2.59383	5e-05	0.000731486
SLPI	chr20:43880878-43883206	siGATA6	siNT	OK	353.937	244.915	-0.53121	-2.48323	5e-05	0.000731486
SLCO3A1	chr15:92396937-92715665	siGATA6	siNT	OK	2.59926	1.75266	-0.568551	-1.60932	0.00485	0.0359287
SLC7A5	chr16:87863628-87903100	siGATA6	siNT	OK	178.854	126.719	-0.497146	-2.56325	5e-05	0.000731486
SLC26A9	chr1:205882176-205912588	siGATA6	siNT	OK	14.9838	7.50684	-0.997128	-4.16872	5e-05	0.000731486
SLC25A12	chr2:172639914-172750816	siGATA6	siNT	OK	5.54684	3.91121	-0.50405	-1.8093	0.00205	0.0179249
SGK223	chr8:8175257-8239257	siGATA6	siNT	OK	35.3247	22.0227	-0.681687	-3.17959	5e-05	0.000731486
SERTAD4	chr1:210404803-210416440	siGATA6	siNT	OK	14.4879	10.2612	-0.497651	-1.81809	0.00165	0.0150439
SERTAD1	chr19:40928408-40931932	siGATA6	siNT	OK	53.5289	38.9567	-0.458447	-1.91495	0.00085	0.00872562
SERINC5	chr5:79407049-79551898	siGATA6	siNT	OK	16.2035	10.1579	-0.673711	-2.95714	5e-05	0.000731486
SEMA3C	chr7:80371853-80548667	siGATA6	siNT	OK	16.4006	10.418	-0.654666	-2.84912	5e-05	0.000731486
SCEL	chr13:78109808-78219398	siGATA6	siNT	OK	39.2	22.3149	-0.812846	-3.62625	5e-05	0.000731486
SAV1	chr14:51100297-51135071	siGATA6	siNT	OK	12.5285	9.08765	-0.46324	-1.83191	0.0016	0.0147244
SAT1	chrX:23801274-23804327	siGATA6	siNT	OK	290.127	206.089	-0.493415	-2.40961	5e-05	0.000731486
SASH1	chr6:148663728-148873184	siGATA6	siNT	OK	2.49802	1.40135	-0.833965	-2.86484	5e-05	0.000731486
S100A4	chr1:153516094-153518282	siGATA6	siNT	OK	86.6583	59.1923	-0.549927	-2.10008	0.0002	0.00257825
S100A2	chr1:153533584-153538306	siGATA6	siNT	OK	26.1166	11.9046	-1.13346	-3.88875	5e-05	0.000731486
RUNX1	chr21:36160097-36421595	siGATA6	siNT	OK	25.4286	19.1882	-0.406232	-1.62503	0.00465	0.0347691
RPPH1	chr14:20811229-20811570	siGATA6	siNT	OK	10.4817	4.40349	-1.25116	-2.23125	0.00085	0.00872562
RNF43	chr17:56378587-56494931	siGATA6	siNT	OK	51.1625	33.4233	-0.614233	-2.5871	5e-05	0.000731486
RND3	chr2:151324706-151344209	siGATA6	siNT	OK	19.9164	12.5399	-0.667433	-2.73403	5e-05	0.000731486
RIT1	chr1:155867598-155881193	siGATA6	siNT	OK	13.4453	9.69339	-0.472025	-1.91159	0.00085	0.00872562
RIN2	chr20:19867164-19983103	siGATA6	siNT	OK	10.0641	7.23504	-0.476153	-1.91379	0.00095	0.00956802
RHOB	chr2:20646834-20649201	siGATA6	siNT	OK	52.0454	26.5589	-0.970574	-4.32767	5e-05	0.000731486
RDX	chr11:110045604-110167437	siGATA6	siNT	OK	15.0858	5.98114	-1.3347	-4.6941	5e-05	0.000731486
RBPJ	chr4:26321331-26436752	siGATA6	siNT	OK	6.80602	4.83353	-0.493737	-1.92103	0.0009	0.00913632
RBM12B	chr8:94743730-94753224	siGATA6	siNT	OK	5.8498	4.25496	-0.459241	-1.72418	0.00335	0.0268861
RASSF10	chr11:13030969-13033653	siGATA6	siNT	OK	7.49172	5.08353	-0.559466	-1.96312	0.00055	0.00615433
RASD1	chr17:17397752-17399709	siGATA6	siNT	OK	2.2537	1.11387	-1.01672	-2.37347	0.0001	0.00138839
RAB40B	chr17:80614942-80656598	siGATA6	siNT	OK	48.6373	36.0437	-0.432317	-1.8909	0.00075	0.00792795
RAB30	chr11:82692477-82782884	siGATA6	siNT	OK	6.21129	4.33926	-0.517443	-1.58053	0.00585	0.0416495
PTRF	chr17:40554466-40575338	siGATA6	siNT	OK	44.3777	23.7446	-0.902233	-4.16495	5e-05	0.000731486
PTPN14	chr1:214522038-214725024	siGATA6	siNT	OK	2.79027	2.05314	-0.44257	-1.75114	0.0032	0.0258443
PTHLH	chr12:28111016-28124916	siGATA6	siNT	OK	2.5575	1.02035	-1.32567	-2.79362	5e-05	0.000731486
PTGER2	chr14:52781015-52795322	siGATA6	siNT	OK	2.26917	1.45798	-0.638196	-1.72915	0.00315	0.0255371
PRDM1	chr6:106534194-106557814	siGATA6	siNT	OK	2.25978	1.20834	-0.90315	-2.77244	5e-05	0.000731486
PPP1R18	chr6_ssto_hap7:1976469-1979473	siGATA6	siNT	OK	5.35851	3.72458	-0.524754	-1.76138	0.00165	0.0150439
PPP1R15A	chr19:49375648-49379319	siGATA6	siNT	OK	166.493	106.852	-0.639842	-3.17956	5e-05	0.000731486
PPCDC	chr15:75315926-75343067	siGATA6	siNT	OK	13.1909	9.64518	-0.451662	-1.69483	0.0035	0.0278456
POGK	chr1:166808723-166823709	siGATA6	siNT	OK	27.2779	17.1768	-0.667269	-2.97559	5e-05	0.000731486
PMEPA1	chr20:56223447-56286592	siGATA6	siNT	OK	24.7371	13.1893	-0.907308	-4.04538	5e-05	0.000731486
PLK2	chr5:57749809-57755966	siGATA6	siNT	OK	6.65794	4.89331	-0.444265	-1.56153	0.00615	0.0433992
PLEKHM1P	chr17:62780958-62833302	siGATA6	siNT	OK	5.65569	3.81069	-0.569649	-1.9281	0.00085	0.00872562
PLEKHB1	chr11:73357222-73373864	siGATA6	siNT	OK	41.9782	28.983	-0.534433	-2.32803	5e-05	0.000731486
PIK3R3	chr1:46505811-46598708	siGATA6	siNT	OK	3.61734	2.45389	-0.559858	-1.98856	0.00055	0.00615433
PGM2L1	chr11:74041360-74109502	siGATA6	siNT	OK	3.46905	2.13368	-0.701193	-2.61782	5e-05	0.000731486
PFDN4	chr20:52824501-52836492	siGATA6	siNT	OK	19.1479	13.7133	-0.481609	-1.65638	0.00365	0.0286297
PDZD8	chr10:119042605-119134937	siGATA6	siNT	OK	13.7004	9.54586	-0.521267	-2.13827	0.0002	0.00257825
PDGFB	chr22:39619684-39640957	siGATA6	siNT	OK	8.05485	5.52033	-0.545104	-1.86222	0.00185	0.0165723
PCED1B	chr12:47602202-47630443	siGATA6	siNT	OK	8.52196	4.12224	-1.04776	-3.44288	5e-05	0.000731486
NTN4	chr12:96043030-96184536	siGATA6	siNT	OK	10.4775	7.26953	-0.527355	-2.06294	0.00035	0.00425081
NRARP	chr9:140194082-140196703	siGATA6	siNT	OK	61.4612	42.9848	-0.51585	-2.41022	5e-05	0.000731486
NR2F2	chr15:96869156-96883492	siGATA6	siNT	OK	36.919	26.2823	-0.490271	-2.28487	5e-05	0.000731486
NOTCH2NL	chr1:145209110-145285912	siGATA6	siNT	OK	4.08123	2.99491	-0.446494	-1.58827	0.0054	0.0390539
NOTCH1	chr9:139388895-139440238	siGATA6	siNT	OK	15.0279	9.5433	-0.655079	-3.01066	5e-05	0.000731486
NLK	chr17:26369687-26523404	siGATA6	siNT	OK	7.65514	5.68098	-0.430288	-1.60605	0.00585	0.0416495
NKD1	chr16:50582240-50674771	siGATA6	siNT	OK	3.5752	1.32639	-1.43051	-5.13201	5e-05	0.000731486
NFKBIA	chr14:35870715-35873960	siGATA6	siNT	OK	50.5945	34.1507	-0.567064	-2.43893	5e-05	0.000731486
NEURL1B	chr5:172068275-172118533	siGATA6	siNT	OK	3.20491	1.96703	-0.704266	-2.47633	5e-05	0.000731486
NAV2	chr11:19372270-20143147	siGATA6	siNT	OK	2.49575	1.79675	-0.474078	-1.70535	0.0037	0.0289156
NAALADL2	chr3:174577110-175523428	siGATA6	siNT	OK	2.56938	1.355	-0.923133	-2.91412	5e-05	0.000731486
MUC20	chr3:195447752-195464540	siGATA6	siNT	OK	14.221	8.8969	-0.676646	-2.95738	5e-05	0.000731486
MTUS1	chr8:17501302-17658426	siGATA6	siNT	OK	39.1192	22.3211	-0.809471	-3.7446	5e-05	0.000731486
MSMO1	chr4:166248817-166264314	siGATA6	siNT	OK	21.7278	15.5705	-0.480732	-1.89875	0.00115	0.0112204
MPP7	chr10:28339922-28571067	siGATA6	siNT	OK	5.34672	3.74685	-0.512977	-1.91552	0.00085	0.00872562
MPLKIP	chr7:40172341-40174251	siGATA6	siNT	OK	49.7992	36.003	-0.468005	-1.85402	0.00135	0.0128773
MMP7	chr11:102391238-102401478	siGATA6	siNT	OK	16.582	1.81335	-3.1929	-8.27798	5e-05	0.000731486
MMD	chr17:53469973-53499341	siGATA6	siNT	OK	3.13611	1.79575	-0.804391	-2.34714	0.00015	0.001996
MKNK2	chr19:2037469-2051243	siGATA6	siNT	OK	34.7902	25.5655	-0.44448	-1.7724	0.00175	0.0158204
MIER1	chr1:67390577-67454302	siGATA6	siNT	OK	5.34052	3.92914	-0.442769	-1.56152	0.0068	0.0470523
MGAT5B	chr17:74864797-74946471	siGATA6	siNT	OK	2.57368	1.544	-0.737161	-2.30191	5e-05	0.000731486
MFAP1	chr15:44096732-44116951	siGATA6	siNT	OK	39.9759	28.9616	-0.464986	-2.02625	0.00055	0.00615433
MEIS2	chr15:37183221-37393500	siGATA6	siNT	OK	8.80441	6.17692	-0.511338	-1.88096	0.0014	0.0132359
MED26	chr19:16685717-16739015	siGATA6	siNT	OK	9.24784	6.96573	-0.408842	-1.55013	0.00715	0.0488145
MBOAT2	chr2:8996700-9143876	siGATA6	siNT	OK	5.2231	3.0909	-0.756878	-2.62337	5e-05	0.000731486
MBOAT1	chr6:20099915-20212695	siGATA6	siNT	OK	3.75932	2.70039	-0.477306	-1.60593	0.00575	0.0410976
MAP3K9	chr14:71194853-71275888	siGATA6	siNT	OK	6.38837	4.27687	-0.578893	-2.2467	0.00015	0.001996
MAFB	chr20:39314516-39317876	siGATA6	siNT	OK	3.44312	1.82108	-0.918923	-2.84337	5e-05	0.000731486
LZTS2	chr10:102756863-102790914	siGATA6	siNT	OK	17.8057	13.1598	-0.436198	-1.74738	0.0024	0.0203594
LURAP1L	chr9:12775011-12823059	siGATA6	siNT	OK	11.0852	8.18507	-0.437569	-1.65355	0.005	0.0366581
LRIG1	chr3:66119284-66550845	siGATA6	siNT	OK	9.25637	4.97989	-0.894332	-2.62537	5e-05	0.000731486
LPCAT1	chr5:1461541-1524076	siGATA6	siNT	OK	10.5125	7.58707	-0.470491	-1.88084	0.00115	0.0112204
LOC285074	chr2:87257797-87303536	siGATA6	siNT	OK	2.81199	1.56443	-0.845955	-2.30819	0.0002	0.00257825
LOC100862671	chr16:30751511-30756517	siGATA6	siNT	OK	16.5221	10.0557	-0.716387	-2.72329	5e-05	0.000731486
LMCD1	chr3:8543510-8609806	siGATA6	siNT	OK	9.43791	5.90539	-0.676435	-2.2623	0.00025	0.00313443
LIPT1	chr2:99771417-99779613	siGATA6	siNT	OK	2.30816	1.03192	-1.16141	-2.4373	5e-05	0.000731486
LINC00673	chr17:70399462-70588943	siGATA6	siNT	OK	109.555	83.1448	-0.39796	-1.92907	0.0008	0.00835302
LIF	chr22:30636435-30642840	siGATA6	siNT	OK	10.8489	7.96482	-0.445839	-1.79803	0.0021	0.0182128
LEMD3	chr12:65563350-65642141	siGATA6	siNT	OK	7.10958	5.16446	-0.461145	-1.8107	0.00155	0.0143467
LEF1	chr4:108968700-109097586	siGATA6	siNT	OK	3.73506	1.03142	-1.8565	-5.37049	5e-05	0.000731486
KRT80	chr12:52562779-52585784	siGATA6	siNT	OK	67.6202	50.5039	-0.421059	-2.07702	0.00025	0.00313443
KRT23	chr17:39078951-39093836	siGATA6	siNT	OK	3.12235	1.83026	-0.770584	-2.14096	0.0002	0.00257825
KRT17	chr17:39775691-39780882	siGATA6	siNT	OK	793.901	185.088	-2.10075	-10.6534	5e-05	0.000731486
KRT16	chr17:39766030-39769079	siGATA6	siNT	OK	122.714	42.3724	-1.5341	-7.02985	5e-05	0.000731486
KLK6	chr19:51461886-51472929	siGATA6	siNT	OK	271.066	172.339	-0.653392	-3.26179	5e-05	0.000731486
KLK10	chr19:51515999-51523431	siGATA6	siNT	OK	281.667	198.631	-0.503898	-2.60278	5e-05	0.000731486
KLHL24	chr3:183353410-183402304	siGATA6	siNT	OK	1.77001	1.16248	-0.606559	-1.96725	0.0006	0.0066155
KLF10	chr8:103661004-103667983	siGATA6	siNT	OK	69.5058	48.933	-0.506327	-2.42665	5e-05	0.000731486
KIAA0907	chr1:155882835-155904188	siGATA6	siNT	OK	9.90995	7.24845	-0.451206	-1.703	0.0024	0.0203594
KHDRBS3	chr8:136469715-136659848	siGATA6	siNT	OK	17.1942	13.0106	-0.402232	-1.55152	0.00645	0.0451183
KCTD1	chr18:24034873-24237365	siGATA6	siNT	OK	30.9699	21.7181	-0.511968	-2.16646	0.00015	0.001996
KCNS3	chr2:18059944-18114225	siGATA6	siNT	OK	10.0519	6.92922	-0.536709	-1.93624	0.00085	0.00872562
KANSL1	chr17_ctg5_hap1:563497-760700	siGATA6	siNT	OK	10.514	7.44495	-0.497972	-2.02526	0.00045	0.00522253
JUNB	chr19:12902309-12904125	siGATA6	siNT	OK	98.5769	63.7434	-0.628974	-2.93794	5e-05	0.000731486
JDP2	chr14:75894508-75939404	siGATA6	siNT	OK	4.00676	2.69471	-0.572307	-1.91676	0.00085	0.00872562
ISG20	chr15:89182038-89198879	siGATA6	siNT	OK	57.4484	43.1014	-0.414532	-1.69273	0.00375	0.0292349
IRX2	chr5:2746278-2751769	siGATA6	siNT	OK	29.8108	22.6465	-0.396548	-1.69204	0.0032	0.0258443
INSIG1	chr7:155089485-155101945	siGATA6	siNT	OK	15.8688	11.8997	-0.415268	-1.69775	0.00245	0.0207013
INHBB	chr2:121103718-121109383	siGATA6	siNT	OK	16.0808	9.5755	-0.747916	-3.02527	5e-05	0.000731486
ILF3-AS1	chr19:10762537-10764548	siGATA6	siNT	OK	4.68751	2.79845	-0.744194	-2.22754	0.00015	0.001996
IL8	chr4:74606222-74609433	siGATA6	siNT	OK	18.1754	6.14222	-1.56516	-5.48195	5e-05	0.000731486
IL20RA	chr6:137321107-137366298	siGATA6	siNT	OK	3.91267	2.73751	-0.515289	-1.71602	0.0026	0.0216966
IL18	chr11:112013973-112034840	siGATA6	siNT	OK	13.0231	6.91772	-0.91271	-2.86523	5e-05	0.000731486
IGSF3	chr1:117117030-117210314	siGATA6	siNT	OK	14.5908	10.6257	-0.457506	-2.07718	0.0002	0.00257825
IGFBP3	chr7:45951843-45960871	siGATA6	siNT	OK	1.8836	1.0478	-0.846126	-2.1885	0.00025	0.00313443
IGF1R	chr15:99192760-99507759	siGATA6	siNT	OK	7.10606	5.21432	-0.446571	-1.95483	0.00075	0.00792795
IER5L	chr9:131937830-131940540	siGATA6	siNT	OK	17.3237	8.53051	-1.02204	-4.00965	5e-05	0.000731486
IER5	chr1:181057637-181059979	siGATA6	siNT	OK	32.2483	22.4211	-0.524364	-2.25972	0.00015	0.001996
HRH1	chr3:11178778-11304939	siGATA6	siNT	OK	2.97428	1.58073	-0.911956	-2.88423	5e-05	0.000731486
HOXC13	chr12:54329111-54340328	siGATA6	siNT	OK	5.64905	3.2848	-0.782201	-2.36012	5e-05	0.000731486
HOXB8	chr17:46689707-46692301	siGATA6	siNT	OK	14.269	7.7584	-0.879056	-3.14281	5e-05	0.000731486
HOXB6	chr17:46667822-46683774	siGATA6	siNT	OK	14.4216	8.59589	-0.746513	-2.44436	5e-05	0.000731486
HMGCS2	chr1:120290618-120311555	siGATA6	siNT	OK	127.023	61.0828	-1.05626	-5.11118	5e-05	0.000731486
HMGB2	chr4:174252526-174255595	siGATA6	siNT	OK	155.692	103.498	-0.589089	-2.83385	5e-05	0.000731486
HIST1H4E	chr6:26204872-26205249	siGATA6	siNT	OK	5.55414	2.56852	-1.11262	-1.69111	0.00545	0.039371
HIST1H4C	chr6:26104175-26104565	siGATA6	siNT	OK	6.79783	2.85642	-1.25087	-2.08688	0.00095	0.00956802
HEXIM2	chr17:43238263-43247406	siGATA6	siNT	OK	4.36819	2.34801	-0.895598	-2.33506	0.00015	0.001996
HEXIM1	chr17:43224683-43229468	siGATA6	siNT	OK	15.4622	10.3609	-0.577598	-2.48745	5e-05	0.000731486
HDAC9	chr7:18126571-19036992	siGATA6	siNT	OK	3.34546	1.34355	-1.31615	-3.9195	5e-05	0.000731486
HAP1	chr17:39878890-39890898	siGATA6	siNT	OK	8.12723	4.95633	-0.713491	-2.68838	5e-05	0.000731486
GTF2IRD1	chr7:73868119-74016920	siGATA6	siNT	OK	15.8627	10.1418	-0.645323	-2.63253	5e-05	0.000731486
GRAMD3	chr5:125695787-125829853	siGATA6	siNT	OK	6.55851	4.39819	-0.576456	-1.97332	0.00085	0.00872562
GPR110	chr6:46967812-47010082	siGATA6	siNT	OK	92.0399	38.9926	-1.23906	-5.64419	5e-05	0.000731486
GPA33	chr1:167022081-167059868	siGATA6	siNT	OK	4.24138	1.73969	-1.2857	-3.87316	5e-05	0.000731486
GLCE	chr15:69116302-69564544	siGATA6	siNT	OK	4.56421	2.73508	-0.738783	-2.21323	0.00035	0.00425081
GJB4	chr1:35225341-35229325	siGATA6	siNT	OK	2.73132	1.51032	-0.854749	-2.45532	5e-05	0.000731486
GINS3	chr16:58426297-58440048	siGATA6	siNT	OK	10.4771	7.64546	-0.454567	-1.63378	0.0046	0.0344556
GEM	chr8:95261484-95274547	siGATA6	siNT	OK	15.3573	7.64735	-1.00589	-3.72283	5e-05	0.000731486
GDF15	chr19:18496967-18499986	siGATA6	siNT	OK	90.4541	68.6381	-0.398176	-1.786	0.0027	0.0223707
GATSL3	chr22:30681106-30685616	siGATA6	siNT	OK	8.76054	5.85932	-0.580286	-1.9055	0.0012	0.0116638
GATA3	chr10:8096666-8117164	siGATA6	siNT	OK	6.9361	4.04205	-0.779036	-2.73425	5e-05	0.000731486
GADD45G	chr9:92219926-92221469	siGATA6	siNT	OK	7.28006	4.61155	-0.658699	-1.87949	0.00115	0.0112204
GADD45B	chr19:2476122-2478257	siGATA6	siNT	OK	21.9873	10.3603	-1.08561	-3.90684	5e-05	0.000731486
FOXP1	chr3:71003864-71633140	siGATA6	siNT	OK	3.93522	2.05909	-0.934433	-3.14457	5e-05	0.000731486
FOSB	chr19:45971252-45978437	siGATA6	siNT	OK	5.11462	3.12344	-0.711489	-2.4648	5e-05	0.000731486
FNIP2	chr4:159690181-159956333	siGATA6	siNT	OK	10.6685	8.1186	-0.394057	-1.67464	0.00395	0.030387
FGFBP1	chr4:15937192-15940363	siGATA6	siNT	OK	2.77613	1.69936	-0.708088	-1.6886	0.00355	0.0280862
FGF19	chr11:69513005-69519106	siGATA6	siNT	OK	4.92277	3.38873	-0.538727	-1.67701	0.00325	0.0261656
FBXO32	chr8:124510126-124553493	siGATA6	siNT	OK	2.06897	1.26655	-0.708014	-2.33152	0.0001	0.00138839
FAM83B	chr6:54711568-54809897	siGATA6	siNT	OK	1.51301	1.04167	-0.538519	-1.65596	0.00455	0.034141
FAM46B	chr1:27331510-27339333	siGATA6	siNT	OK	7.3724	4.73176	-0.639757	-2.18199	0.00015	0.001996
FAM3D	chr3:58619669-58652561	siGATA6	siNT	OK	17.8508	10.1289	-0.817507	-2.85568	5e-05	0.000731486
FAIM2	chr12:50260678-50297760	siGATA6	siNT	OK	1.89654	1.2324	-0.621903	-1.89272	0.00065	0.00705738
ETS1	chr11:128328655-128457453	siGATA6	siNT	OK	10.4348	7.3138	-0.512703	-2.12345	0.00025	0.00313443
ENPP5	chr6:46127761-46138717	siGATA6	siNT	OK	7.57195	5.00915	-0.596098	-2.10758	0.0002	0.00257825
ELOVL5	chr6:53132195-53213977	siGATA6	siNT	OK	3.61253	2.38226	-0.600677	-1.70711	0.0032	0.0258443
EGR1	chr5:137801180-137805004	siGATA6	siNT	OK	36.9087	24.288	-0.603718	-2.7225	5e-05	0.000731486
EGLN1	chr1:231499496-231560790	siGATA6	siNT	OK	13.5842	10.3174	-0.396843	-1.77643	0.0016	0.0147244
EFNA3	chr1:155051347-155060014	siGATA6	siNT	OK	69.5887	46.558	-0.579825	-2.62864	5e-05	0.000731486
EFCAB2	chr1:245133170-245288530	siGATA6	siNT	OK	6.67163	4.43971	-0.587576	-1.62062	0.0052	0.0378857
EDN1	chr6:12290528-12297427	siGATA6	siNT	OK	6.99356	2.69618	-1.37511	-4.29237	5e-05	0.000731486
E2F7	chr12:77415025-77459360	siGATA6	siNT	OK	6.49813	4.53115	-0.520147	-2.04099	0.00075	0.00792795
DUSP5	chr10:112257624-112271302	siGATA6	siNT	OK	5.9138	3.75376	-0.655749	-2.16867	0.0002	0.00257825
DUSP10	chr1:221874763-221915516	siGATA6	siNT	OK	5.24952	3.3789	-0.635631	-2.06886	0.0005	0.00567924
DSC2	chr18:28645941-28682388	siGATA6	siNT	OK	51.2311	38.0849	-0.427801	-2.10658	0.0002	0.00257825
DRAM1	chr12:102271104-102317401	siGATA6	siNT	OK	8.59014	4.80067	-0.839447	-3.11464	5e-05	0.000731486
DNM3	chr1:171810620-172381857	siGATA6	siNT	OK	3.6181	1.47527	-1.29425	-4.59176	5e-05	0.000731486
DLX6	chr7:96597826-96643377	siGATA6	siNT	OK	1.84649	1.11907	-0.72249	-1.61669	0.0053	0.0384393
DLGAP1-AS1	chr18:3496029-4455266	siGATA6	siNT	OK	3.54974	1.23275	-1.52583	-3.06277	5e-05	0.000731486
DIDO1	chr20:61509089-61569304	siGATA6	siNT	OK	43.1505	32.9046	-0.391088	-1.58452	0.0052	0.0378857
DENND3	chr8:142138719-142205900	siGATA6	siNT	OK	3.25042	1.74783	-0.895059	-3.02517	5e-05	0.000731486
DDIT4	chr10:74033676-74035797	siGATA6	siNT	OK	60.9756	42.9467	-0.505685	-2.26487	5e-05	0.000731486
CYR61	chr1:86046443-86049648	siGATA6	siNT	OK	11.7435	4.50107	-1.38352	-4.81214	5e-05	0.000731486
CYP1B1	chr2:38294745-38303323	siGATA6	siNT	OK	21.4466	10.0024	-1.1004	-4.82685	5e-05	0.000731486
CYB5R2	chr11:7686325-7694821	siGATA6	siNT	OK	25.1822	17.7397	-0.505428	-1.91988	0.0011	0.01084
CXCL3	chr4:74902311-74904490	siGATA6	siNT	OK	10.1886	5.36434	-0.925477	-2.82233	5e-05	0.000731486
CXCL2	chr4:74962753-74964997	siGATA6	siNT	OK	7.8659	3.27295	-1.26502	-3.58945	5e-05	0.000731486
CXCL1	chr4:74735108-74737019	siGATA6	siNT	OK	8.08984	4.22036	-0.938746	-2.72174	5e-05	0.000731486
CTGF	chr6:132269316-132272518	siGATA6	siNT	OK	27.5007	7.8344	-1.81157	-7.05707	5e-05	0.000731486
CTDSP2	chr12:58213709-58240747	siGATA6	siNT	OK	27.3057	19.2246	-0.506249	-2.34142	5e-05	0.000731486
CSTF1	chr20:54967426-54979582	siGATA6	siNT	OK	42.6292	32.2277	-0.40354	-1.79717	0.00185	0.0165723
CST1	chr20:23728189-23731574	siGATA6	siNT	OK	8.48759	4.35035	-0.964226	-2.47316	5e-05	0.000731486
CSRP2BP	chr20:18118498-18169031	siGATA6	siNT	OK	24.8546	17.2508	-0.526848	-2.0537	0.00035	0.00425081
CRY2	chr11:45868668-45904799	siGATA6	siNT	OK	15.3438	10.9802	-0.482752	-2.06195	0.0003	0.00369971
CPLX2	chr5:175223609-175311023	siGATA6	siNT	OK	34.392	20.9686	-0.71384	-3.31743	5e-05	0.000731486
CPEB2	chr4:15004297-15071777	siGATA6	siNT	OK	2.71886	1.89659	-0.519594	-1.80898	0.00145	0.0135981
COL9A3	chr20:61448413-61493115	siGATA6	siNT	OK	58.5479	26.679	-1.13391	-4.74209	5e-05	0.000731486
CNTD2	chr19:40728114-40732597	siGATA6	siNT	OK	4.51678	2.73435	-0.724098	-2.1202	0.0003	0.00369971
CLIC5	chr6:45866189-46048085	siGATA6	siNT	OK	4.35757	1.75013	-1.31606	-3.62633	5e-05	0.000731486
CLIC3	chr9:139889059-139891024	siGATA6	siNT	OK	84.003	58.9933	-0.509889	-2.12097	0.00025	0.00313443
CLDN3	chr7:73183326-73184600	siGATA6	siNT	OK	40.0992	20.0841	-0.997516	-3.92573	5e-05	0.000731486
CKS2	chr9:91926112-91931618	siGATA6	siNT	OK	426.432	311.483	-0.453163	-2.16505	0.0002	0.00257825
CITED4	chr1:41326727-41328018	siGATA6	siNT	OK	5.99477	2.28153	-1.3937	-3.72028	5e-05	0.000731486
CITED2	chr6:139693391-139695787	siGATA6	siNT	OK	39.5682	24.7686	-0.675831	-2.87879	5e-05	0.000731486
CES1	chr16:55836763-55867075	siGATA6	siNT	OK	3.61186	2.36662	-0.609916	-1.75029	0.0025	0.0210128
CELSR3	chr3:48673895-48700348	siGATA6	siNT	OK	2.26037	1.66636	-0.439862	-1.65325	0.0034	0.0271682
CEBPB	chr20:48807119-48809227	siGATA6	siNT	OK	47.5258	32.3284	-0.555909	-2.47148	5e-05	0.000731486
CEACAM1	chr19:42901299-43156507	siGATA6	siNT	OK	42.3527	30.9019	-0.45476	-1.91053	0.0009	0.00913632
CDKN2B	chr9:21994789-22121093	siGATA6	siNT	OK	2.33593	1.55776	-0.584529	-1.73289	0.00265	0.0220277
CDCA7L	chr7:21582832-21985542	siGATA6	siNT	OK	16.1671	11.7428	-0.461283	-1.86256	0.0013	0.0124747
CDA	chr1:20915443-20945400	siGATA6	siNT	OK	16.6678	8.14187	-1.03363	-3.29137	5e-05	0.000731486
CCRN4L	chr4:139936942-139967095	siGATA6	siNT	OK	3.03625	1.88257	-0.689592	-1.86235	0.00155	0.0143467
CCND3	chr6:41902670-42016610	siGATA6	siNT	OK	338.371	203.783	-0.731572	-3.7418	5e-05	0.000731486
CCDC90B	chr11:82972501-82997377	siGATA6	siNT	OK	29.7379	22.2595	-0.417882	-1.66748	0.00415	0.0316404
CCDC71L	chr7:106297210-106301634	siGATA6	siNT	OK	2.48338	1.38519	-0.842222	-2.60758	5e-05	0.000731486
CAV1	chr7:116164838-116201239	siGATA6	siNT	OK	4.41272	2.03307	-1.11801	-3.42581	5e-05	0.000731486
CASP8	chr2:202098165-202152434	siGATA6	siNT	OK	11.2067	7.99806	-0.486646	-1.58688	0.00595	0.0422206
CASP2	chr7:142985307-143004789	siGATA6	siNT	OK	12.0116	8.82244	-0.445176	-1.8277	0.0018	0.0161924
CACNG4	chr17:64960979-65029518	siGATA6	siNT	OK	8.26235	4.05182	-1.02798	-3.71142	5e-05	0.000731486
C9orf85	chr9:74526422-74588371	siGATA6	siNT	OK	8.38803	5.64819	-0.570544	-1.77131	0.0019	0.0169255
C9orf116	chr9:138387025-138391761	siGATA6	siNT	OK	19.7786	14.0828	-0.489999	-1.57717	0.007	0.0480209
C6orf48	chr6_qbl_hap6:3096351-3101196	siGATA6	siNT	OK	57.6112	42.9439	-0.423897	-1.64424	0.00395	0.030387
C2orf54	chr2:241825464-241835573	siGATA6	siNT	OK	20.3657	7.51744	-1.43783	-5.54208	5e-05	0.000731486
C22orf29	chr22:19775933-19842462	siGATA6	siNT	OK	13.6516	9.80369	-0.477675	-2.02675	0.00045	0.00522253
C15orf52	chr15:40623652-40633168	siGATA6	siNT	OK	10.4691	6.75749	-0.631585	-2.60856	5e-05	0.000731486
C15orf48	chr15:45722726-45725647	siGATA6	siNT	OK	7.65475	4.18976	-0.869487	-2.3006	0.0002	0.00257825
C15orf41	chr15:36871811-37110707	siGATA6	siNT	OK	6.64694	4.518	-0.557007	-1.87002	0.0009	0.00913632
C11orf1	chr11:111744779-111754797	siGATA6	siNT	OK	39.0117	28.6876	-0.443478	-1.55914	0.00695	0.0477803
BTRC	chr10:103113789-103317078	siGATA6	siNT	OK	4.92651	3.37748	-0.544618	-2.06372	0.0004	0.00473235
BTG1	chr12:92378751-92539673	siGATA6	siNT	OK	11.9236	7.83231	-0.606313	-2.49687	5e-05	0.000731486
BRF2	chr8:37654400-37707431	siGATA6	siNT	OK	9.40962	6.79778	-0.469072	-1.62525	0.0049	0.0361735
BOLA1	chr1:149871154-149872348	siGATA6	siNT	OK	32.3502	23.4573	-0.463737	-1.68543	0.0026	0.0216966
BMP4	chr14:54416454-54423554	siGATA6	siNT	OK	182.337	105.127	-0.794468	-3.86197	5e-05	0.000731486
BMF	chr15:40380090-40401085	siGATA6	siNT	OK	27.7101	9.68872	-1.51603	-6.61018	5e-05	0.000731486
BLCAP	chr20:36145818-36156333	siGATA6	siNT	OK	53.6301	40.8475	-0.392797	-1.77933	0.0021	0.0182128
BHLHE41	chr12:26272958-26278003	siGATA6	siNT	OK	4.56465	2.83753	-0.685866	-2.33371	5e-05	0.000731486
BCL9L	chr11:118754474-118781613	siGATA6	siNT	OK	37.0308	27.5562	-0.426348	-2.07983	0.0004	0.00473235
BCL6	chr3:187416046-187463513	siGATA6	siNT	OK	3.88371	2.00994	-0.950288	-3.01369	5e-05	0.000731486
BCL2L11	chr2:111878490-111926022	siGATA6	siNT	OK	10.1611	5.67684	-0.839897	-1.88292	0.00075	0.00792795
BBC3	chr19:47724078-47736023	siGATA6	siNT	OK	10.6166	5.90037	-0.847439	-2.82383	5e-05	0.000731486
BAMBI	chr10:28966423-28971868	siGATA6	siNT	OK	40.0447	17.7607	-1.17292	-4.79211	5e-05	0.000731486
BAIAP2	chr17:79008946-79156964	siGATA6	siNT	OK	31.9758	22.4389	-0.510977	-2.19148	0.0001	0.00138839
AZGP1	chr7:99564349-99573735	siGATA6	siNT	OK	89.7227	62.8314	-0.513987	-2.3037	5e-05	0.000731486
AXIN2	chr17:63524682-63557740	siGATA6	siNT	OK	47.4109	35.2969	-0.42568	-2.03807	0.0003	0.00369971
ATP10B	chr5:159990126-160279219	siGATA6	siNT	OK	5.18345	1.61819	-1.67953	-6.16165	5e-05	0.000731486
ATG10	chr5:81267843-81551216	siGATA6	siNT	OK	1.82174	1.10763	-0.717845	-1.7929	0.00265	0.0220277
ASPSCR1	chr17:79935425-79975282	siGATA6	siNT	OK	30.4833	19.9656	-0.610503	-2.50185	5e-05	0.000731486
ARV1	chr1:231114822-231136479	siGATA6	siNT	OK	28.3209	18.193	-0.638486	-2.47689	5e-05	0.000731486
ARRDC3	chr5:90664540-90716532	siGATA6	siNT	OK	6.63623	2.92807	-1.18041	-4.10211	5e-05	0.000731486
ARL14	chr3:160394947-160396235	siGATA6	siNT	OK	19.7524	14.1333	-0.482923	-1.74662	0.0027	0.0223707
ARHGEF26	chr3:153742189-153975616	siGATA6	siNT	OK	2.48323	1.31918	-0.912582	-2.83065	5e-05	0.000731486
ARHGDIB	chr12:15094949-15114562	siGATA6	siNT	OK	9.61867	4.47302	-1.10459	-3.32678	5e-05	0.000731486
AQP5	chr12:50355278-50359465	siGATA6	siNT	OK	193.108	127.657	-0.597131	-2.94773	5e-05	0.000731486
APOBEC3B	chr22:39353526-39388784	siGATA6	siNT	OK	48.1063	34.7804	-0.467952	-2.00379	0.00065	0.00705738
APCDD1	chr18:10454624-10488698	siGATA6	siNT	OK	10.6613	5.01173	-1.089	-3.88434	5e-05	0.000731486
ANXA9	chr1:150954498-150968114	siGATA6	siNT	OK	29.0688	21.6961	-0.422038	-1.73757	0.003	0.0244761
ANXA1	chr9:75766780-75785307	siGATA6	siNT	OK	407.092	249.601	-0.705729	-3.56385	5e-05	0.000731486
ANK3	chr10:61786055-62493284	siGATA6	siNT	OK	5.45994	3.38068	-0.691574	-2.72177	5e-05	0.000731486
AMOTL2	chr3:134074189-134093406	siGATA6	siNT	OK	26.3839	16.0273	-0.719123	-3.28295	5e-05	0.000731486
AMIGO2	chr12:47469489-47473734	siGATA6	siNT	OK	12.486	7.7472	-0.688563	-2.66961	5e-05	0.000731486
AKR1C4	chr10:5238797-5260910	siGATA6	siNT	OK	5.58425	2.57788	-1.11518	-2.93391	5e-05	0.000731486
AJUBA	chr14:23440409-23451848	siGATA6	siNT	OK	43.5627	27.619	-0.657435	-3.09076	5e-05	0.000731486
AHNAK2	chr14:105403590-105444694	siGATA6	siNT	OK	1.73457	1.2485	-0.474385	-1.82456	0.00165	0.0150439
ADM	chr11:10326641-10328923	siGATA6	siNT	OK	15.8111	9.38945	-0.751825	-2.64284	5e-05	0.000731486
ACTN1	chr14:69340839-69446083	siGATA6	siNT	OK	121.69	90.32	-0.430094	-2.16362	5e-05	0.000731486
ACSL5	chr10:114133915-114188138	siGATA6	siNT	OK	14.131	9.80426	-0.527379	-2.13133	0.00015	0.001996
ABLIM2	chr4:7967036-8160559	siGATA6	siNT	OK	2.92852	1.66663	-0.81324	-2.36123	0.0001	0.00138839
ABL2	chr1:179068461-179198819	siGATA6	siNT	OK	6.5741	4.41556	-0.574197	-2.40782	5e-05	0.000731486
ABHD2	chr15:89631380-89745591	siGATA6	siNT	OK	65.9147	45.7857	-0.525703	-2.69388	5e-05	0.000731486

## Sheet: S5E siHNF4A+siGATA6 -1.3x
gene	locus	sample_1	sample_2	status	value_1	value_2	log2(fold_change)	test_stat	p_value	q_value	Direct -1.3x (n=395)
MYH4	chr17:10346607-10372876	siHNF4A.siGATA6	siNT	OK	0.0671946	1.55206	4.52969	9.7335	5e-05	0.000386721
BTNL8	chr5:180326076-180377906	siHNF4A.siGATA6	siNT	OK	0.844333	17.7847	4.39668	15.6399	5e-05	0.000386721
MMP1	chr11:102654406-102714342	siHNF4A.siGATA6	siNT	OK	16.8599	336.467	4.3188	27.0989	5e-05	0.000386721
CIDEC	chr3:9908393-9921938	siHNF4A.siGATA6	siNT	OK	0.0770705	1.03644	3.74932	2.44909	0.00115	0.00626016
PLAC8	chr4:84011210-84035911	siHNF4A.siGATA6	siNT	OK	0.574914	7.39996	3.6861	9.44891	5e-05	0.000386721
REG4	chr1:120336640-120354203	siHNF4A.siGATA6	siNT	OK	106.347	1339.67	3.65502	23.8092	5e-05	0.000386721
C19orf77	chr19:3474404-3480540	siHNF4A.siGATA6	siNT	OK	5.12521	48.5972	3.24519	16.1299	5e-05	0.000386721
HNF4A	chr20:42984440-43061485	siHNF4A.siGATA6	siNT	OK	2.69961	22.9981	3.09069	16.5747	5e-05	0.000386721
APOBEC1	chr12:7801995-7818502	siHNF4A.siGATA6	siNT	OK	1.27884	9.29008	2.86085	8.57611	5e-05	0.000386721
CCR6	chr6:167525294-167552629	siHNF4A.siGATA6	siNT	OK	0.282502	2.02397	2.84086	7.69848	5e-05	0.000386721
PCSK5	chr9:78505559-78977255	siHNF4A.siGATA6	siNT	OK	0.610802	4.35633	2.83434	7.42084	5e-05	0.000386721
TM4SF5	chr17:4675186-4686506	siHNF4A.siGATA6	siNT	OK	4.58898	31.7428	2.79018	11.9099	5e-05	0.000386721
LINC00675	chr17:10616638-10718481	siHNF4A.siGATA6	siNT	OK	0.220958	1.40439	2.66809	4.61622	5e-05	0.000386721
CLRN3	chr10:129676113-129691211	siHNF4A.siGATA6	siNT	OK	3.06828	19.334	2.65564	12.1637	5e-05	0.000386721
GSDMB	chr17:38060847-38074903	siHNF4A.siGATA6	siNT	OK	0.977147	5.73385	2.55286	8.83614	5e-05	0.000386721
LYZL4	chr3:42438574-42452065	siHNF4A.siGATA6	siNT	OK	0.300993	1.52099	2.33721	3.04144	0.00045	0.00279275
IYD	chr6:150690027-150725765	siHNF4A.siGATA6	siNT	OK	0.228666	1.15098	2.33155	8.30998	5e-05	0.000386721
HABP2	chr10:115310589-115423829	siHNF4A.siGATA6	siNT	OK	5.96351	29.3438	2.29882	13.7502	5e-05	0.000386721
PLB1	chr2:28718937-28866653	siHNF4A.siGATA6	siNT	OK	0.55888	2.65959	2.25059	10.0382	5e-05	0.000386721
FAM189A2	chr9:71939487-72007370	siHNF4A.siGATA6	siNT	OK	0.577748	2.71358	2.23169	7.06814	5e-05	0.000386721
SLCO2B1	chr11:74862031-74917445	siHNF4A.siGATA6	siNT	OK	6.27667	29.0492	2.21043	13.5851	5e-05	0.000386721
FAM109A	chr12:111798454-111806925	siHNF4A.siGATA6	siNT	OK	4.99753	22.4433	2.16699	12.8702	5e-05	0.000386721
LGALS4	chr19:39292310-39303740	siHNF4A.siGATA6	siNT	OK	216.635	935.95	2.11117	13.9247	5e-05	0.000386721
FAM46A	chr6:82455446-82462428	siHNF4A.siGATA6	siNT	OK	4.78851	19.7657	2.04535	12.7215	5e-05	0.000386721
CCK	chr3:42299317-42307662	siHNF4A.siGATA6	siNT	OK	53.767	221.634	2.04339	11.86	5e-05	0.000386721
HS3ST5	chr6:114376749-114384041	siHNF4A.siGATA6	siNT	OK	0.297283	1.20938	2.02436	5.58927	5e-05	0.000386721
HSD17B2	chr16:82068857-82132139	siHNF4A.siGATA6	siNT	OK	5.0387	18.0237	1.83877	9.44141	5e-05	0.000386721
UNC5CL	chr6:40994639-41006938	siHNF4A.siGATA6	siNT	OK	4.794	16.1199	1.74954	10.2105	5e-05	0.000386721
ACY3	chr11:67410025-67418130	siHNF4A.siGATA6	siNT	OK	3.16205	10.5674	1.7407	8.14172	5e-05	0.000386721
FAM101A	chr12:124457761-124800570	siHNF4A.siGATA6	siNT	OK	8.84966	29.1076	1.7177	4.2277	5e-05	0.000386721
ANXA10	chr4:169013687-169108893	siHNF4A.siGATA6	siNT	OK	90.2677	291.803	1.69271	11.1553	5e-05	0.000386721
DDC	chr7:50526133-50633154	siHNF4A.siGATA6	siNT	OK	9.44048	30.3212	1.6834	10.0285	5e-05	0.000386721
SLC15A1	chr13:99336054-99404929	siHNF4A.siGATA6	siNT	OK	3.94665	12.6355	1.67878	9.54188	5e-05	0.000386721
DNAJC22	chr12:49741040-49745685	siHNF4A.siGATA6	siNT	OK	6.89827	22.0041	1.67347	9.47283	5e-05	0.000386721
EPS8L3	chr1:110292701-110306644	siHNF4A.siGATA6	siNT	OK	9.95066	30.6754	1.62422	9.81559	5e-05	0.000386721
ALPPL2	chr2:233271551-233275424	siHNF4A.siGATA6	siNT	OK	1.72973	5.32107	1.62117	7.68493	5e-05	0.000386721
GATA6	chr18:19749403-19782491	siHNF4A.siGATA6	siNT	OK	12.5588	38.4069	1.61267	10.3225	5e-05	0.000386721
SLC9A3	chr5:473333-524549	siHNF4A.siGATA6	siNT	OK	3.2159	9.50904	1.56408	8.3682	5e-05	0.000386721
HTR1D	chr1:23518387-23521222	siHNF4A.siGATA6	siNT	OK	1.78663	5.27799	1.56275	7.59079	5e-05	0.000386721
FAM171A1	chr10:15253643-15413058	siHNF4A.siGATA6	siNT	OK	6.13523	18.1242	1.56273	9.54671	5e-05	0.000386721
SSTR1	chr14:38677203-38682268	siHNF4A.siGATA6	siNT	OK	1.93008	5.65153	1.54998	8.27332	5e-05	0.000386721
C4BPB	chr1:207262211-207273337	siHNF4A.siGATA6	siNT	OK	6.3812	18.5849	1.54223	7.41609	5e-05	0.000386721
C2orf72	chr2:231902280-231914427	siHNF4A.siGATA6	siNT	OK	6.1239	17.5356	1.51777	9.20044	5e-05	0.000386721
CLDN2	chrX:106143292-106174091	siHNF4A.siGATA6	siNT	OK	47.7096	135.402	1.5049	9.92925	5e-05	0.000386721
PGC	chr6:41704448-41715139	siHNF4A.siGATA6	siNT	OK	13.6632	38.6526	1.50028	8.85023	5e-05	0.000386721
KIAA1211	chr4:57036360-57196890	siHNF4A.siGATA6	siNT	OK	1.88877	5.32937	1.49652	8.59776	5e-05	0.000386721
FN1	chr2:216225178-216300791	siHNF4A.siGATA6	siNT	OK	0.417237	1.13945	1.4494	5.7305	5e-05	0.000386721
FRRS1	chr1:100111430-100231349	siHNF4A.siGATA6	siNT	OK	3.05315	8.24707	1.43358	6.9757	5e-05	0.000386721
AQP11	chr11:77300679-77321401	siHNF4A.siGATA6	siNT	OK	1.93039	5.19648	1.42864	6.74608	5e-05	0.000386721
ABCG2	chr4:89011415-89152474	siHNF4A.siGATA6	siNT	OK	10.1032	27.0537	1.42102	9.03131	5e-05	0.000386721
IGFL2	chr19:46651038-46664561	siHNF4A.siGATA6	siNT	OK	23.2176	61.7048	1.41017	7.4691	5e-05	0.000386721
PRSS12	chr4:119201192-119273922	siHNF4A.siGATA6	siNT	OK	12.467	31.8458	1.35299	8.72429	5e-05	0.000386721
C12orf75	chr12:105724413-105765296	siHNF4A.siGATA6	siNT	OK	15.9419	40.1052	1.33096	7.9488	5e-05	0.000386721
ST3GAL2	chr16:70413337-70472991	siHNF4A.siGATA6	siNT	OK	1.7716	4.40367	1.31365	6.86628	5e-05	0.000386721
LEPREL1	chr3:189674516-189840226	siHNF4A.siGATA6	siNT	OK	1.70717	4.20189	1.29943	6.3392	5e-05	0.000386721
GAS6	chr13:114518582-114567046	siHNF4A.siGATA6	siNT	OK	7.89027	19.4162	1.29911	7.56649	5e-05	0.000386721
PRSS3	chr9:33750463-33799229	siHNF4A.siGATA6	siNT	OK	115.022	280.101	1.28403	8.19867	5e-05	0.000386721
TFF2	chr21:43766466-43771208	siHNF4A.siGATA6	siNT	OK	11.8627	28.8545	1.28237	6.40184	5e-05	0.000386721
IRF8	chr16:85932773-85956211	siHNF4A.siGATA6	siNT	OK	4.94234	11.9347	1.27189	7.20708	5e-05	0.000386721
PID1	chr2:229888688-230136057	siHNF4A.siGATA6	siNT	OK	1.1229	2.70791	1.26995	5.34051	5e-05	0.000386721
PIEZO2	chr18:10670243-11148761	siHNF4A.siGATA6	siNT	OK	2.24128	5.31475	1.24568	7.53657	5e-05	0.000386721
SLC22A18AS	chr11:2909326-2946476	siHNF4A.siGATA6	siNT	OK	3.77456	8.91993	1.24072	2.58711	5e-05	0.000386721
GDA	chr9:74729510-74867140	siHNF4A.siGATA6	siNT	OK	37.7245	88.556	1.23109	7.36702	5e-05	0.000386721
AGR2	chr7:16832263-16844738	siHNF4A.siGATA6	siNT	OK	3214.85	7526.97	1.22732	7.56419	5e-05	0.000386721
PLAUR	chr19:44150246-44174498	siHNF4A.siGATA6	siNT	OK	38.494	88.2772	1.19741	7.66692	5e-05	0.000386721
NDNF	chr4:121956781-121993673	siHNF4A.siGATA6	siNT	OK	1.48269	3.39948	1.1971	5.65658	5e-05	0.000386721
RNF128	chrX:105937067-106040246	siHNF4A.siGATA6	siNT	OK	22.6532	51.8591	1.19488	7.68133	5e-05	0.000386721
AK5	chr1:77747661-78025654	siHNF4A.siGATA6	siNT	OK	0.575967	1.31334	1.18918	4.32762	5e-05	0.000386721
GLYCTK	chr3:52321835-52329272	siHNF4A.siGATA6	siNT	OK	3.07452	6.99961	1.18691	5.11497	5e-05	0.000386721
MGST3	chr1:165600109-165625372	siHNF4A.siGATA6	siNT	OK	80.6369	183.258	1.18437	7.78957	5e-05	0.000386721
CDH17	chr8:95139393-95229531	siHNF4A.siGATA6	siNT	OK	50.7041	115.159	1.18346	7.83932	5e-05	0.000386721
PTGR1	chr9:114287446-114362135	siHNF4A.siGATA6	siNT	OK	296.047	664.661	1.16679	7.67309	5e-05	0.000386721
ASS1	chr9:133320093-133376661	siHNF4A.siGATA6	siNT	OK	134.482	299.555	1.1554	7.67175	5e-05	0.000386721
GUCA2A	chr1:42628361-42630395	siHNF4A.siGATA6	siNT	OK	6.14908	13.6593	1.15144	4.51744	5e-05	0.000386721
SLC10A5	chr8:82605890-82607207	siHNF4A.siGATA6	siNT	OK	0.463303	1.02062	1.13942	2.39993	0.0004	0.00252154
IHH	chr2:219919141-219925238	siHNF4A.siGATA6	siNT	OK	5.3442	11.6598	1.1255	6.15804	5e-05	0.000386721
CDH11	chr16:64980682-65155919	siHNF4A.siGATA6	siNT	OK	3.2754	7.14469	1.1252	6.26812	5e-05	0.000386721
APOD	chr3:195295572-195311076	siHNF4A.siGATA6	siNT	OK	3.47516	7.56841	1.12291	4.93548	5e-05	0.000386721
MECOM	chr3:168801286-169381563	siHNF4A.siGATA6	siNT	OK	4.47408	9.63932	1.10734	6.62496	5e-05	0.000386721
CARD11	chr7:2945709-3083509	siHNF4A.siGATA6	siNT	OK	9.97666	21.3614	1.09838	6.96574	5e-05	0.000386721
CENPV	chr17:16245847-16256812	siHNF4A.siGATA6	siNT	OK	57.9416	123.168	1.08795	7.00623	5e-05	0.000386721
APBB1IP	chr10:26727265-26856732	siHNF4A.siGATA6	siNT	OK	1.64951	3.5037	1.08684	5.12051	5e-05	0.000386721
AMN	chr14:103388992-103397179	siHNF4A.siGATA6	siNT	OK	0.762463	1.60714	1.07575	3.1744	5e-05	0.000386721
FGD2	chr6:36973422-36996845	siHNF4A.siGATA6	siNT	OK	0.756456	1.59352	1.07489	4.13072	5e-05	0.000386721
CYP2S1	chr19:41699114-41713444	siHNF4A.siGATA6	siNT	OK	50.7844	106.131	1.06339	7.00779	5e-05	0.000386721
SLC7A7	chr14:23242431-23289020	siHNF4A.siGATA6	siNT	OK	36.2961	75.6832	1.06016	6.87113	5e-05	0.000386721
SULT1B1	chr4:70592685-70626430	siHNF4A.siGATA6	siNT	OK	4.13602	8.56951	1.05097	4.9095	5e-05	0.000386721
SERPINE2	chr2:224839764-224904036	siHNF4A.siGATA6	siNT	OK	3.05034	6.31951	1.05084	5.26259	5e-05	0.000386721
CREG2	chr2:101964815-102003965	siHNF4A.siGATA6	siNT	OK	2.64551	5.42757	1.03676	5.51433	5e-05	0.000386721
RAMP1	chr2:238768186-238820755	siHNF4A.siGATA6	siNT	OK	0.653408	1.34026	1.03646	2.05936	0.00125	0.00673946
AREG	chr4:75480628-75490485	siHNF4A.siGATA6	siNT	OK	1.20985	2.4649	1.0267	3.23801	5e-05	0.000386721
MFNG	chr22:37865100-37882478	siHNF4A.siGATA6	siNT	OK	1.57543	3.20067	1.02263	4.36055	5e-05	0.000386721
MYO15B	chr17:73584138-73663269	siHNF4A.siGATA6	siNT	OK	1.50314	3.05277	1.02214	4.08883	5e-05	0.000386721
ITPKA	chr15:41786055-41795757	siHNF4A.siGATA6	siNT	OK	11.8429	24.0499	1.02201	6.07015	5e-05	0.000386721
LYZ	chr12:69742133-69748013	siHNF4A.siGATA6	siNT	OK	1614.1	3262.52	1.01526	6.36573	5e-05	0.000386721
RALYL	chr8:85095452-85834078	siHNF4A.siGATA6	siNT	OK	7.20655	14.4101	0.999703	5.61146	5e-05	0.000386721
KALRN	chr3:123813557-124440036	siHNF4A.siGATA6	siNT	OK	11.4171	22.757	0.995116	6.43133	5e-05	0.000386721
BHLHA15	chr7:97841565-97842271	siHNF4A.siGATA6	siNT	OK	5.12206	10.1919	0.992632	4.00861	5e-05	0.000386721
PTPRH	chr19:55692614-55720874	siHNF4A.siGATA6	siNT	OK	7.16383	14.218	0.988915	6.07388	5e-05	0.000386721
PKDCC	chr2:42275160-42285668	siHNF4A.siGATA6	siNT	OK	5.64223	11.1709	0.985407	5.57838	5e-05	0.000386721
MICALL2	chr7:1473994-1499109	siHNF4A.siGATA6	siNT	OK	14.3205	28.2778	0.981586	6.21051	5e-05	0.000386721
IRAK2	chr3:10206562-10285427	siHNF4A.siGATA6	siNT	OK	1.34408	2.65332	0.981182	4.49156	5e-05	0.000386721
NRP1	chr10:33466418-33623833	siHNF4A.siGATA6	siNT	OK	5.52921	10.7595	0.960462	5.0465	5e-05	0.000386721
ABHD6	chr3:58223258-58280461	siHNF4A.siGATA6	siNT	OK	5.07396	9.79094	0.948334	5.24645	5e-05	0.000386721
PLA2G4F	chr15:42433331-42448839	siHNF4A.siGATA6	siNT	OK	4.73514	9.12989	0.947189	5.4939	5e-05	0.000386721
NDRG1	chr8:134249413-134309547	siHNF4A.siGATA6	siNT	OK	19.9486	38.159	0.93574	6.00423	5e-05	0.000386721
KCTD12	chr13:77454303-77460540	siHNF4A.siGATA6	siNT	OK	5.46521	10.4308	0.932502	5.80388	5e-05	0.000386721
PIM1	chr6:37137921-37143204	siHNF4A.siGATA6	siNT	OK	8.24541	15.7173	0.930694	5.56597	5e-05	0.000386721
GPR116	chr6:46820241-46922675	siHNF4A.siGATA6	siNT	OK	0.650407	1.23871	0.92942	4.17791	5e-05	0.000386721
VIL1	chr2:219283837-219314248	siHNF4A.siGATA6	siNT	OK	53.3544	101.514	0.928002	6.12654	5e-05	0.000386721
SLC41A2	chr12:105197274-105322472	siHNF4A.siGATA6	siNT	OK	4.29647	8.15522	0.924572	5.29764	5e-05	0.000386721
AKAP2	chr9:112403067-112934791	siHNF4A.siGATA6	siNT	OK	2.23605	4.21113	0.913253	4.66245	5e-05	0.000386721
HGD	chr3:120347014-120401418	siHNF4A.siGATA6	siNT	OK	27.6177	51.9539	0.91164	5.82848	5e-05	0.000386721
GRK5	chr10:120967196-121215131	siHNF4A.siGATA6	siNT	OK	17.779	33.3866	0.909092	5.75318	5e-05	0.000386721
CLDN23	chr8:8559665-8561617	siHNF4A.siGATA6	siNT	OK	0.901499	1.68602	0.903227	3.09152	5e-05	0.000386721
LOXL1	chr15:74209808-74244478	siHNF4A.siGATA6	siNT	OK	6.94935	12.9301	0.895782	4.18255	5e-05	0.000386721
GALC	chr14:88399357-88460009	siHNF4A.siGATA6	siNT	OK	8.50209	15.8032	0.894328	5.55394	5e-05	0.000386721
AZGP1	chr7:99564349-99573735	siHNF4A.siGATA6	siNT	OK	49.4804	91.7063	0.890166	5.70445	5e-05	0.000386721
GNAL	chr18:11689013-11908796	siHNF4A.siGATA6	siNT	OK	2.18647	4.02207	0.879333	1.79202	0.0046	0.0203522
IL22RA1	chr1:24446260-24469775	siHNF4A.siGATA6	siNT	OK	4.24047	7.79961	0.879176	4.88472	5e-05	0.000386721
ICOSLG	chr21:45646721-45660834	siHNF4A.siGATA6	siNT	OK	8.2886	15.2392	0.878591	5.35211	5e-05	0.000386721
LYN	chr8:56792385-56925006	siHNF4A.siGATA6	siNT	OK	29.1277	53.3149	0.872149	5.73745	5e-05	0.000386721
WSCD1	chr17:5973933-6027747	siHNF4A.siGATA6	siNT	OK	8.89069	16.2694	0.871793	5.56091	5e-05	0.000386721
TSPAN8	chr12:71518876-71551779	siHNF4A.siGATA6	siNT	OK	435.248	795.381	0.869808	5.76782	5e-05	0.000386721
EXT1	chr8:118811601-119124058	siHNF4A.siGATA6	siNT	OK	17.7269	32.3083	0.865964	5.56307	5e-05	0.000386721
IL4R	chr16:27325229-27376099	siHNF4A.siGATA6	siNT	OK	7.62913	13.8944	0.864916	5.24937	5e-05	0.000386721
SMPDL3A	chr6:123109970-123130864	siHNF4A.siGATA6	siNT	OK	8.13254	14.7896	0.8628	5.00753	5e-05	0.000386721
TMEM45B	chr11:129685740-129729898	siHNF4A.siGATA6	siNT	OK	91.3315	166.054	0.862471	5.71784	5e-05	0.000386721
SDCBP2	chr20:1290554-1373816	siHNF4A.siGATA6	siNT	OK	19.3823	35.0434	0.8544	1.90954	0.00135	0.00721279
SLC35D1	chr1:67465014-67520080	siHNF4A.siGATA6	siNT	OK	6.27025	11.305	0.850373	5.35901	5e-05	0.000386721
MTSS1	chr8:125563027-125740730	siHNF4A.siGATA6	siNT	OK	9.04226	16.2662	0.847118	5.36895	5e-05	0.000386721
PRNP	chr20:4666796-4682234	siHNF4A.siGATA6	siNT	OK	26.7065	47.8519	0.841382	5.42281	5e-05	0.000386721
STAMBPL1	chr10:90639943-90683259	siHNF4A.siGATA6	siNT	OK	4.85423	8.67454	0.837544	4.46634	5e-05	0.000386721
ADAM28	chr8:24151579-24212726	siHNF4A.siGATA6	siNT	OK	2.58085	4.60015	0.833834	4.29723	5e-05	0.000386721
MUC13	chr3:124624288-124653595	siHNF4A.siGATA6	siNT	OK	66.1454	117.409	0.827831	5.48505	5e-05	0.000386721
TSPAN3	chr15:77336359-77363570	siHNF4A.siGATA6	siNT	OK	51.3364	90.6305	0.820014	5.43883	5e-05	0.000386721
MX2	chr21:42733949-42780869	siHNF4A.siGATA6	siNT	OK	2.88001	5.08287	0.81957	4.24999	5e-05	0.000386721
NOSTRIN	chr2:169643048-169721849	siHNF4A.siGATA6	siNT	OK	4.09725	7.22354	0.81805	4.15956	5e-05	0.000386721
GPA33	chr1:167022081-167059868	siHNF4A.siGATA6	siNT	OK	1.45609	2.56459	0.816632	3.61128	5e-05	0.000386721
JAG1	chr20:10618331-10654694	siHNF4A.siGATA6	siNT	OK	24.8479	43.6867	0.814073	5.37843	5e-05	0.000386721
PRR9	chr1:153190059-153191793	siHNF4A.siGATA6	siNT	OK	0.589934	1.03712	0.813956	1.82211	0.0042	0.0188992
FOS	chr14:75745480-75748937	siHNF4A.siGATA6	siNT	OK	9.79273	17.0454	0.799599	4.73141	5e-05	0.000386721
TTC13	chr1:231041986-231114618	siHNF4A.siGATA6	siNT	OK	13.8029	23.9475	0.794901	5.00149	5e-05	0.000386721
GRB10	chr7:50657759-50861159	siHNF4A.siGATA6	siNT	OK	7.14393	12.392	0.79462	4.9349	5e-05	0.000386721
RELL1	chr4:37455551-37687999	siHNF4A.siGATA6	siNT	OK	6.70705	11.6072	0.791265	2.2214	5e-05	0.000386721
MMP15	chr16:58059281-58080804	siHNF4A.siGATA6	siNT	OK	27.8766	48.0605	0.785799	5.16607	5e-05	0.000386721
INO80C	chr18:33048290-33077955	siHNF4A.siGATA6	siNT	OK	4.73625	8.14909	0.782894	3.51901	5e-05	0.000386721
NIPAL1	chr4:48018790-48039080	siHNF4A.siGATA6	siNT	OK	4.13385	7.10894	0.782148	4.0676	5e-05	0.000386721
LRRC66	chr4:52859865-52883786	siHNF4A.siGATA6	siNT	OK	0.777988	1.337	0.781181	3.09204	5e-05	0.000386721
B3GNT5	chr3:182895830-183145855	siHNF4A.siGATA6	siNT	OK	6.2368	10.7077	0.779768	4.7262	5e-05	0.000386721
CASK	chrX:41374188-41782287	siHNF4A.siGATA6	siNT	OK	6.78498	11.5537	0.767938	4.92567	5e-05	0.000386721
PALLD	chr4:169418216-169849608	siHNF4A.siGATA6	siNT	OK	8.11162	13.7787	0.764376	4.73979	5e-05	0.000386721
SEL1L3	chr4:25749048-25864610	siHNF4A.siGATA6	siNT	OK	42.7548	72.5699	0.763284	5.06082	5e-05	0.000386721
GGT1	chr22:24979717-25024972	siHNF4A.siGATA6	siNT	OK	41.647	70.6242	0.761951	4.79318	5e-05	0.000386721
CAPNS1	chr19:36630917-36641255	siHNF4A.siGATA6	siNT	OK	189.474	321	0.760573	5.05544	5e-05	0.000386721
F2RL1	chr5:76114832-76131140	siHNF4A.siGATA6	siNT	OK	5.89612	9.97983	0.759249	4.38465	5e-05	0.000386721
KITLG	chr12:88886569-88974250	siHNF4A.siGATA6	siNT	OK	5.50087	9.25811	0.751058	4.60251	5e-05	0.000386721
C6orf222	chr6:36283534-36304662	siHNF4A.siGATA6	siNT	OK	1.03585	1.74092	0.74903	3.25077	5e-05	0.000386721
ACSS1	chr20:24986865-25038818	siHNF4A.siGATA6	siNT	OK	14.8874	25.0003	0.747855	4.78446	5e-05	0.000386721
CEBPA	chr19:33790839-33793430	siHNF4A.siGATA6	siNT	OK	17.9459	30.1314	0.747609	4.72345	5e-05	0.000386721
HSD17B11	chr4:88257690-88312455	siHNF4A.siGATA6	siNT	OK	34.2175	57.2254	0.741921	4.76379	5e-05	0.000386721
HAS3	chr16:69139466-69166493	siHNF4A.siGATA6	siNT	OK	10.3896	17.3597	0.740605	2.41341	0.0001	0.000735824
KDELR2	chr7:6500711-6523849	siHNF4A.siGATA6	siNT	OK	94.504	157.738	0.739085	4.91346	5e-05	0.000386721
BCL3	chr19:45251977-45263301	siHNF4A.siGATA6	siNT	OK	12.3665	20.6096	0.736883	4.38017	5e-05	0.000386721
INPP1	chr2:191208195-191236391	siHNF4A.siGATA6	siNT	OK	9.91469	16.4985	0.734699	4.30971	5e-05	0.000386721
GSTO1	chr10:106013951-106027222	siHNF4A.siGATA6	siNT	OK	60.6752	100.938	0.734292	4.68613	5e-05	0.000386721
AGR3	chr7:16899029-16921613	siHNF4A.siGATA6	siNT	OK	8.58119	14.2722	0.73396	3.38738	5e-05	0.000386721
C9orf152	chr9:112961845-112970413	siHNF4A.siGATA6	siNT	OK	36.3448	60.3998	0.732793	4.78266	5e-05	0.000386721
QSOX1	chr1:180123967-180169859	siHNF4A.siGATA6	siNT	OK	139.243	229.162	0.718766	4.2581	5e-05	0.000386721
MXD1	chr2:70142172-70170076	siHNF4A.siGATA6	siNT	OK	4.32635	7.11188	0.717079	4.32758	5e-05	0.000386721
PLCXD2	chr3:111393522-111695364	siHNF4A.siGATA6	siNT	OK	0.628732	1.03305	0.716397	1.75487	0.00405	0.0183039
ST5	chr11:8714898-8932498	siHNF4A.siGATA6	siNT	OK	6.6411	10.8767	0.711747	4.15369	5e-05	0.000386721
KCTD3	chr1:215740734-215795149	siHNF4A.siGATA6	siNT	OK	27.2649	44.5948	0.70983	4.65039	5e-05	0.000386721
PLLP	chr16:57290008-57318584	siHNF4A.siGATA6	siNT	OK	28.0875	45.8854	0.708104	4.42495	5e-05	0.000386721
SOS1	chr2:39208689-39347604	siHNF4A.siGATA6	siNT	OK	12.6488	20.6189	0.704959	4.61978	5e-05	0.000386721
AKR1B1	chr7:134127106-134143888	siHNF4A.siGATA6	siNT	OK	6.46942	10.5103	0.700093	3.58727	5e-05	0.000386721
SERTAD2	chr2:64858754-64881046	siHNF4A.siGATA6	siNT	OK	5.55713	9.01093	0.697335	4.29417	5e-05	0.000386721
UGT8	chr4:115519610-115598202	siHNF4A.siGATA6	siNT	OK	48.6368	78.8582	0.697212	4.59799	5e-05	0.000386721
TRIM24	chr7:138145078-138270332	siHNF4A.siGATA6	siNT	OK	25.7533	41.7488	0.69698	4.54918	5e-05	0.000386721
ZNF618	chr9:116638561-116818875	siHNF4A.siGATA6	siNT	OK	0.675247	1.09201	0.693494	3.36732	5e-05	0.000386721
KCTD15	chr19:34287750-34306666	siHNF4A.siGATA6	siNT	OK	8.03928	12.9972	0.69306	4.22963	5e-05	0.000386721
CD82	chr11:44587140-44641315	siHNF4A.siGATA6	siNT	OK	37.9937	61.3524	0.691361	4.42806	5e-05	0.000386721
CA13	chr8:86157715-86196302	siHNF4A.siGATA6	siNT	OK	13.6389	21.9637	0.687392	4.38175	5e-05	0.000386721
ANTXR2	chr4:80822770-80994477	siHNF4A.siGATA6	siNT	OK	3.84568	6.17648	0.683548	3.02014	5e-05	0.000386721
PLEK2	chr14:67853699-67878828	siHNF4A.siGATA6	siNT	OK	12.9234	20.7105	0.680383	3.93236	5e-05	0.000386721
MICAL2	chr11:12132137-12285331	siHNF4A.siGATA6	siNT	OK	11.0048	17.6342	0.680251	4.28283	5e-05	0.000386721
ZNF488	chr10:48355088-48373866	siHNF4A.siGATA6	siNT	OK	2.30595	3.69317	0.679497	3.46858	5e-05	0.000386721
HKDC1	chr10:70980058-71027315	siHNF4A.siGATA6	siNT	OK	8.90573	14.2544	0.678597	4.19072	5e-05	0.000386721
LRIG3	chr12:59265936-59314319	siHNF4A.siGATA6	siNT	OK	1.14901	1.83665	0.676682	3.04094	5e-05	0.000386721
CEP76	chr18:12658737-12725739	siHNF4A.siGATA6	siNT	OK	19.6715	31.4221	0.675675	2.43319	5e-05	0.000386721
CLCN5	chrX:49687224-49863892	siHNF4A.siGATA6	siNT	OK	2.35833	3.76692	0.675621	1.46829	0.0098	0.0381125
CNKSR3	chr6:154726432-154831753	siHNF4A.siGATA6	siNT	OK	4.03864	6.43805	0.672756	3.73448	5e-05	0.000386721
ETFB	chr19:51848408-51869672	siHNF4A.siGATA6	siNT	OK	571.066	909.614	0.671596	4.44655	5e-05	0.000386721
RCN3	chr19:50030874-50046890	siHNF4A.siGATA6	siNT	OK	4.77134	7.56164	0.664302	3.40755	5e-05	0.000386721
FAM107B	chr10:14560558-14816896	siHNF4A.siGATA6	siNT	OK	17.5434	27.748	0.661454	4.25631	5e-05	0.000386721
CCDC85A	chr2:56411257-56613309	siHNF4A.siGATA6	siNT	OK	0.786685	1.2431	0.660085	2.75027	5e-05	0.000386721
FUCA2	chr6:143815948-143833020	siHNF4A.siGATA6	siNT	OK	20.6552	32.5694	0.657008	4.1782	5e-05	0.000386721
LAMA3	chr18:21269561-21535029	siHNF4A.siGATA6	siNT	OK	16.8774	26.5624	0.654294	4.20824	5e-05	0.000386721
PCSK6	chr15:101844132-102030187	siHNF4A.siGATA6	siNT	OK	13.7868	21.6833	0.653301	4.13402	5e-05	0.000386721
FABP5	chr8:82192717-82197012	siHNF4A.siGATA6	siNT	OK	106.646	167.669	0.652795	4.17741	5e-05	0.000386721
ATP11B	chr3:182511290-182639421	siHNF4A.siGATA6	siNT	OK	9.95415	15.6407	0.651931	4.217	5e-05	0.000386721
ABO	chr9:136130562-136150630	siHNF4A.siGATA6	siNT	OK	27.6829	43.465	0.650857	4.0717	5e-05	0.000386721
ANG	chr14:21152335-21168758	siHNF4A.siGATA6	siNT	OK	25.5745	40.0966	0.648773	2.28936	5e-05	0.000386721
MAN1A1	chr6:119498365-119670931	siHNF4A.siGATA6	siNT	OK	6.53172	10.2365	0.648194	4.00598	5e-05	0.000386721
CDIP1	chr16:4560676-4588816	siHNF4A.siGATA6	siNT	OK	8.45971	13.1991	0.641755	3.80508	5e-05	0.000386721
FGD4	chr12:32655040-32798984	siHNF4A.siGATA6	siNT	OK	1.96845	3.06372	0.638224	3.67029	5e-05	0.000386721
LAPTM4A	chr2:20232410-20251789	siHNF4A.siGATA6	siNT	OK	89.2435	138.74	0.63657	4.20026	5e-05	0.000386721
ITGB5	chr3:124481794-124606144	siHNF4A.siGATA6	siNT	OK	41.6038	64.6487	0.635907	4.19078	5e-05	0.000386721
CLCN4	chrX:10124984-10205699	siHNF4A.siGATA6	siNT	OK	2.28203	3.54443	0.635235	3.61421	5e-05	0.000386721
ANXA5	chr4:122589151-122618147	siHNF4A.siGATA6	siNT	OK	159.37	247.49	0.63499	4.21559	5e-05	0.000386721
GAB1	chr4:144257982-144395718	siHNF4A.siGATA6	siNT	OK	0.65729	1.0157	0.62788	2.95594	5e-05	0.000386721
TSEN2	chr3:12525930-12574820	siHNF4A.siGATA6	siNT	OK	10.963	16.894	0.62387	3.6963	5e-05	0.000386721
XYLT1	chr16:17196180-17564738	siHNF4A.siGATA6	siNT	OK	2.12942	3.27346	0.620354	3.6509	5e-05	0.000386721
RAPGEF5	chr7:22157907-22396533	siHNF4A.siGATA6	siNT	OK	1.92525	2.95711	0.619139	3.43049	5e-05	0.000386721
DGCR5	chr22:18958010-18982142	siHNF4A.siGATA6	siNT	OK	3.94679	6.05876	0.618342	3.39049	5e-05	0.000386721
MGST2	chr4:140586921-141075233	siHNF4A.siGATA6	siNT	OK	134.753	206.816	0.618035	3.59576	5e-05	0.000386721
ALDH1A1	chr9:75515577-75568233	siHNF4A.siGATA6	siNT	OK	1.09492	1.67797	0.615895	2.37523	5e-05	0.000386721
GRTP1	chr13:113978504-114018463	siHNF4A.siGATA6	siNT	OK	22.1715	33.9769	0.615849	3.74959	5e-05	0.000386721
LRP1	chr12:57522281-57607125	siHNF4A.siGATA6	siNT	OK	6.55547	10.037	0.614554	4.00742	5e-05	0.000386721
PIP5K1B	chr9:71320615-71624091	siHNF4A.siGATA6	siNT	OK	23.4338	35.8509	0.613418	3.49898	5e-05	0.000386721
UPP1	chr7:48128354-48148330	siHNF4A.siGATA6	siNT	OK	4.26977	6.52541	0.611909	3.04736	5e-05	0.000386721
TUBB6	chr18:12308256-12326568	siHNF4A.siGATA6	siNT	OK	1.22095	1.86404	0.610423	2.21519	0.0002	0.00137159
SMTNL2	chr17:4487275-4511614	siHNF4A.siGATA6	siNT	OK	0.792784	1.20981	0.609782	1.93905	0.0011	0.00602233
NCR3LG1	chr11:17373308-17398868	siHNF4A.siGATA6	siNT	OK	6.28927	9.57018	0.605653	3.79763	5e-05	0.000386721
SH3RF2	chr5:145316125-145442879	siHNF4A.siGATA6	siNT	OK	4.64268	7.05717	0.60413	3.38148	5e-05	0.000386721
SPIRE2	chr16:89894906-89937727	siHNF4A.siGATA6	siNT	OK	10.4058	15.8114	0.603572	3.72109	5e-05	0.000386721
SNX7	chr1:99127235-99226056	siHNF4A.siGATA6	siNT	OK	7.33705	11.136	0.601955	3.32116	5e-05	0.000386721
HOOK3	chr8:42752032-42885682	siHNF4A.siGATA6	siNT	OK	2.59991	3.94017	0.599799	3.73164	5e-05	0.000386721
FFAR4	chr10:95326421-95349829	siHNF4A.siGATA6	siNT	OK	3.61807	5.47788	0.598399	3.31526	5e-05	0.000386721
FAM46C	chr1:118148603-118171011	siHNF4A.siGATA6	siNT	OK	3.09359	4.68335	0.59826	3.46918	5e-05	0.000386721
GOLIM4	chr3:167727653-167813417	siHNF4A.siGATA6	siNT	OK	23.8177	35.9105	0.592368	3.81374	5e-05	0.000386721
HMOX1	chr22:35777059-35790207	siHNF4A.siGATA6	siNT	OK	23.3769	35.1293	0.587593	3.62369	5e-05	0.000386721
ACER2	chr9:19408924-19452500	siHNF4A.siGATA6	siNT	OK	4.40659	6.62113	0.587414	3.20762	5e-05	0.000386721
SLC12A8	chr3:124801479-124931609	siHNF4A.siGATA6	siNT	OK	6.24974	9.37868	0.585588	3.45612	5e-05	0.000386721
PRKAR1B	chr7:588833-826116	siHNF4A.siGATA6	siNT	OK	14.622	21.9266	0.584543	2.62558	5e-05	0.000386721
PTK2B	chr8:27168998-27316908	siHNF4A.siGATA6	siNT	OK	8.82508	13.2281	0.583921	3.61194	5e-05	0.000386721
GUCD1	chr22:24936405-24951275	siHNF4A.siGATA6	siNT	OK	42.115	62.8614	0.577841	3.81323	5e-05	0.000386721
OPTN	chr10:13142081-13180276	siHNF4A.siGATA6	siNT	OK	5.84132	8.71837	0.577763	3.39884	5e-05	0.000386721
TUBA1C	chr12:49658864-49667113	siHNF4A.siGATA6	siNT	OK	1406.25	2098.53	0.577518	3.68269	5e-05	0.000386721
EFNB1	chrX:68048839-68062006	siHNF4A.siGATA6	siNT	OK	42.2464	62.7333	0.570402	3.75609	5e-05	0.000386721
IQGAP2	chr5:75699148-76003957	siHNF4A.siGATA6	siNT	OK	9.00088	13.3603	0.56981	3.61989	5e-05	0.000386721
ERGIC1	chr5:172261222-172379688	siHNF4A.siGATA6	siNT	OK	79.4199	117.783	0.568563	3.77394	5e-05	0.000386721
EGFL7	chr9:139553307-139567130	siHNF4A.siGATA6	siNT	OK	55.7663	82.6621	0.567831	3.6461	5e-05	0.000386721
ALDH3A1	chr17:19641297-19651746	siHNF4A.siGATA6	siNT	OK	3242.03	4805.14	0.56768	3.32291	5e-05	0.000386721
MB21D2	chr3:192514604-192635950	siHNF4A.siGATA6	siNT	OK	5.65093	8.36181	0.565327	3.28813	5e-05	0.000386721
CRLS1	chr20:5986738-6020697	siHNF4A.siGATA6	siNT	OK	17.0087	25.0675	0.559547	3.60297	5e-05	0.000386721
IDH1	chr2:209100952-209119806	siHNF4A.siGATA6	siNT	OK	149.586	220.321	0.558636	3.71199	5e-05	0.000386721
F5	chr1:169481191-169555769	siHNF4A.siGATA6	siNT	OK	18.9295	27.8053	0.554721	3.6693	5e-05	0.000386721
TMC5	chr16:19422056-19510434	siHNF4A.siGATA6	siNT	OK	10.2136	14.9815	0.552687	3.50174	5e-05	0.000386721
FUT4	chr11:94277016-94283064	siHNF4A.siGATA6	siNT	OK	5.3552	7.85037	0.551822	3.40124	5e-05	0.000386721
GOLT1A	chr1:204167287-204183220	siHNF4A.siGATA6	siNT	OK	4.44233	6.50761	0.550811	2.31823	5e-05	0.000386721
PPP1R9A	chr7:94536948-94925727	siHNF4A.siGATA6	siNT	OK	1.94739	2.84837	0.548596	3.18741	5e-05	0.000386721
TEP1	chr14:20833825-20881579	siHNF4A.siGATA6	siNT	OK	1.73464	2.53255	0.545951	3.18346	5e-05	0.000386721
GOLM1	chr9:88641057-88715116	siHNF4A.siGATA6	siNT	OK	74.0384	108.063	0.54553	3.63919	5e-05	0.000386721
HDHD3	chr9:116135697-116138341	siHNF4A.siGATA6	siNT	OK	18.6922	27.1631	0.53921	3.29543	5e-05	0.000386721
NBL1	chr1:19923470-19984949	siHNF4A.siGATA6	siNT	OK	35.4521	51.5007	0.538723	2.50321	5e-05	0.000386721
LIMA1	chr12:50569562-50677353	siHNF4A.siGATA6	siNT	OK	37.0962	53.8812	0.538512	3.56799	5e-05	0.000386721
P2RY2	chr11:72929343-72947395	siHNF4A.siGATA6	siNT	OK	3.59103	5.215	0.53827	2.75621	5e-05	0.000386721
TPRG1	chr3:188889762-189041271	siHNF4A.siGATA6	siNT	OK	1.83388	2.6626	0.537934	2.61678	5e-05	0.000386721
GMDS	chr6:1624034-2245868	siHNF4A.siGATA6	siNT	OK	125.945	182.828	0.537689	3.55591	5e-05	0.000386721
GCNT3	chr15:59903981-59912210	siHNF4A.siGATA6	siNT	OK	15.1135	21.9369	0.537524	3.30484	5e-05	0.000386721
KIF21B	chr1:200938513-200992828	siHNF4A.siGATA6	siNT	OK	2.47552	3.59272	0.537347	3.18567	5e-05	0.000386721
CALM2	chr2:47387220-47403740	siHNF4A.siGATA6	siNT	OK	848.392	1231.26	0.53733	3.51876	5e-05	0.000386721
NMNAT3	chr3:139279022-139396885	siHNF4A.siGATA6	siNT	OK	3.51309	5.09776	0.537123	2.57792	5e-05	0.000386721
PLS1	chr3:142315228-142432505	siHNF4A.siGATA6	siNT	OK	42.9868	62.3734	0.537036	3.54714	5e-05	0.000386721
CEBPA-AS1	chr19:33793762-33795963	siHNF4A.siGATA6	siNT	OK	0.801557	1.1612	0.534737	1.7646	0.0025	0.0122444
PROS1	chr3:93591880-93692934	siHNF4A.siGATA6	siNT	OK	2.42038	3.50284	0.533292	2.73781	5e-05	0.000386721
SFT2D2	chr1:168195254-168212088	siHNF4A.siGATA6	siNT	OK	24.2869	35.1197	0.532102	3.04901	5e-05	0.000386721
PSPH	chr7:56078743-56119268	siHNF4A.siGATA6	siNT	OK	19.007	27.4399	0.529742	3.29604	5e-05	0.000386721
MAOA	chrX:43514154-43606071	siHNF4A.siGATA6	siNT	OK	5.09958	7.35082	0.527527	3.18847	5e-05	0.000386721
C1orf210	chr1:43747556-43751288	siHNF4A.siGATA6	siNT	OK	10.568	15.2333	0.527526	2.93505	5e-05	0.000386721
CEBPG	chr19:33864574-33873592	siHNF4A.siGATA6	siNT	OK	27.2214	39.2311	0.527256	3.4477	5e-05	0.000386721
PARP16	chr15:65550436-65579018	siHNF4A.siGATA6	siNT	OK	9.84707	14.189	0.527005	3.15505	5e-05	0.000386721
CNNM4	chr2:97426638-97477628	siHNF4A.siGATA6	siNT	OK	7.10203	10.2302	0.526528	3.25283	5e-05	0.000386721
MLXIPL	chr7:73007523-73038870	siHNF4A.siGATA6	siNT	OK	3.6241	5.20902	0.523389	2.81734	5e-05	0.000386721
CIB1	chr15:90773476-90777279	siHNF4A.siGATA6	siNT	OK	80.0995	115.091	0.522915	3.36132	5e-05	0.000386721
SH3BGRL3	chr1:26606212-26608013	siHNF4A.siGATA6	siNT	OK	94.4416	135.692	0.522843	3.40196	5e-05	0.000386721
CYB5R3	chr22:43013845-43045405	siHNF4A.siGATA6	siNT	OK	35.2185	50.5848	0.522369	3.38412	5e-05	0.000386721
ST6GALNAC1	chr17:74620844-74639894	siHNF4A.siGATA6	siNT	OK	19.9693	28.6476	0.520635	3.29612	5e-05	0.000386721
ABCC2	chr10:101542462-101611662	siHNF4A.siGATA6	siNT	OK	12.49	17.9113	0.520099	3.34032	5e-05	0.000386721
AGPAT2	chr9:139567594-139581911	siHNF4A.siGATA6	siNT	OK	72.6054	104.101	0.519835	3.39385	5e-05	0.000386721
FRMD3	chr9:85857904-86153348	siHNF4A.siGATA6	siNT	OK	19.383	27.7665	0.518551	2.84818	5e-05	0.000386721
FAM110B	chr8:58907112-59062277	siHNF4A.siGATA6	siNT	OK	2.88083	4.12524	0.517994	2.8483	5e-05	0.000386721
CTNNAL1	chr9:111704850-111775764	siHNF4A.siGATA6	siNT	OK	64.884	92.7454	0.515413	3.39958	5e-05	0.000386721
S100A16	chr1:153579366-153585514	siHNF4A.siGATA6	siNT	OK	410.171	585.748	0.514055	3.41618	5e-05	0.000386721
COTL1	chr16:84599203-84651669	siHNF4A.siGATA6	siNT	OK	142.707	203.65	0.513038	3.40608	5e-05	0.000386721
LGMN	chr14:93170151-93215047	siHNF4A.siGATA6	siNT	OK	105.882	150.984	0.51193	3.3916	5e-05	0.000386721
TRNP1	chr1:27320194-27327377	siHNF4A.siGATA6	siNT	OK	55.0395	78.4265	0.510874	3.3363	5e-05	0.000386721
IMPA1	chr8:82569150-82598589	siHNF4A.siGATA6	siNT	OK	5.39298	7.67958	0.509945	2.94969	5e-05	0.000386721
KLHL8	chr4:88082213-88141674	siHNF4A.siGATA6	siNT	OK	8.1959	11.663	0.50897	3.16746	5e-05	0.000386721
MTMR2	chr11:95566043-95657371	siHNF4A.siGATA6	siNT	OK	20.6943	29.4293	0.508017	3.30488	5e-05	0.000386721
NABP1	chr2:192542797-192553248	siHNF4A.siGATA6	siNT	OK	2.6639	3.78601	0.50714	2.64477	5e-05	0.000386721
MCU	chr10:74451888-74647452	siHNF4A.siGATA6	siNT	OK	15.3836	21.8537	0.50649	3.1658	5e-05	0.000386721
PDSS1	chr10:26986594-27150016	siHNF4A.siGATA6	siNT	OK	11.7221	16.6503	0.506314	1.53176	0.0087	0.0343952
TPM3	chr1:154127779-154164609	siHNF4A.siGATA6	siNT	OK	295.282	419.409	0.506263	3.32326	5e-05	0.000386721
LAMC2	chr1:183155173-183214262	siHNF4A.siGATA6	siNT	OK	44.2748	62.7674	0.503528	3.32796	5e-05	0.000386721
SHH	chr7:155595557-155604967	siHNF4A.siGATA6	siNT	OK	4.35154	6.16822	0.50333	2.40828	5e-05	0.000386721
ANKRD46	chr8:101521979-101572014	siHNF4A.siGATA6	siNT	OK	6.07245	8.59385	0.501025	2.83019	5e-05	0.000386721
SERPINB1	chr6:2832565-2842283	siHNF4A.siGATA6	siNT	OK	50.4909	71.4502	0.500913	3.2944	5e-05	0.000386721
ARID5A	chr2:97202463-97218371	siHNF4A.siGATA6	siNT	OK	2.15819	3.05315	0.500479	2.23214	0.0001	0.000735824
CTSH	chr15:79214091-79237420	siHNF4A.siGATA6	siNT	OK	131.144	185.415	0.499602	3.30566	5e-05	0.000386721
FUOM	chr10:135168657-135171529	siHNF4A.siGATA6	siNT	OK	13.2722	18.7609	0.499322	2.23552	0.0002	0.00137159
IQGAP3	chr1:156495196-156542396	siHNF4A.siGATA6	siNT	OK	19.9078	28.0734	0.495869	3.25688	5e-05	0.000386721
SLC40A1	chr2:190425315-190445537	siHNF4A.siGATA6	siNT	OK	55.8443	78.538	0.491981	3.25708	5e-05	0.000386721
CALML4	chr15:68483042-68498448	siHNF4A.siGATA6	siNT	OK	2.43382	3.42177	0.491524	2.65951	5e-05	0.000386721
F3	chr1:94994731-95007413	siHNF4A.siGATA6	siNT	OK	2.61254	3.66629	0.488868	2.30349	5e-05	0.000386721
DUSP4	chr8:29190578-29208267	siHNF4A.siGATA6	siNT	OK	53.1286	74.5112	0.487967	3.24126	5e-05	0.000386721
IL6R	chr1:154377668-154441926	siHNF4A.siGATA6	siNT	OK	1.1356	1.59217	0.48754	2.1812	0.0001	0.000735824
RSPH1	chr21:43892596-43916401	siHNF4A.siGATA6	siNT	OK	9.71787	13.6168	0.486675	2.64392	5e-05	0.000386721
SCCPDH	chr1:246887377-246931440	siHNF4A.siGATA6	siNT	OK	10.9341	15.3198	0.486569	2.93069	5e-05	0.000386721
KCNK5	chr6:39156746-39197251	siHNF4A.siGATA6	siNT	OK	9.61626	13.4727	0.486488	3.01339	5e-05	0.000386721
EPS8	chr12:15773074-15942510	siHNF4A.siGATA6	siNT	OK	22.948	32.0956	0.484006	3.15368	5e-05	0.000386721
HK2	chr2:75059781-75120481	siHNF4A.siGATA6	siNT	OK	19.3272	26.9981	0.482225	3.176	5e-05	0.000386721
SURF6	chr9:136197551-136203047	siHNF4A.siGATA6	siNT	OK	49.5781	69.2075	0.481227	3.15167	5e-05	0.000386721
SYTL5	chrX:37865834-37988073	siHNF4A.siGATA6	siNT	OK	2.31408	3.22867	0.480503	2.55476	5e-05	0.000386721
EFHD2	chr1:15736390-15756839	siHNF4A.siGATA6	siNT	OK	38.7199	53.8903	0.47695	3.1032	5e-05	0.000386721
RALA	chr7:39663151-39747723	siHNF4A.siGATA6	siNT	OK	26.2527	36.5309	0.476654	3.0748	5e-05	0.000386721
HPCAL1	chr2:10443029-10567743	siHNF4A.siGATA6	siNT	OK	27.7993	38.6758	0.476382	2.95605	5e-05	0.000386721
BMP2	chr20:6748744-6760910	siHNF4A.siGATA6	siNT	OK	1.00648	1.39947	0.475569	1.97456	0.00045	0.00279275
B4GALT4	chr3:118930588-118959752	siHNF4A.siGATA6	siNT	OK	11.5526	16.0272	0.472309	2.82016	5e-05	0.000386721
SMAGP	chr12:51632507-51664202	siHNF4A.siGATA6	siNT	OK	51.8364	71.8066	0.470151	1.81648	0.00215	0.0107726
BAIAP2L2	chr22:38480895-38506676	siHNF4A.siGATA6	siNT	OK	23.6746	32.7508	0.468187	2.95784	5e-05	0.000386721
FHL2	chr2:105977282-106055230	siHNF4A.siGATA6	siNT	OK	37.3571	51.6253	0.466696	2.96613	5e-05	0.000386721
SIM2	chr21:38071990-38122510	siHNF4A.siGATA6	siNT	OK	2.1747	3.00476	0.466434	2.40817	5e-05	0.000386721
LRP5L	chr22:25747384-25777544	siHNF4A.siGATA6	siNT	OK	0.980535	1.35428	0.465885	1.45595	0.01145	0.0430712
TM4SF4	chr3:149192367-149221181	siHNF4A.siGATA6	siNT	OK	1.41555	1.95285	0.46422	1.66084	0.0046	0.0203522
SLC45A4	chr8:142220869-142238673	siHNF4A.siGATA6	siNT	OK	12.9605	17.8763	0.463929	2.91207	5e-05	0.000386721
SERINC2	chr1:31882411-31907527	siHNF4A.siGATA6	siNT	OK	97.667	134.55	0.462204	3.035	5e-05	0.000386721
NUCB2	chr11:17298285-17353070	siHNF4A.siGATA6	siNT	OK	42.0977	57.932	0.460618	2.94849	5e-05	0.000386721
SCARB1	chr12:125262173-125348519	siHNF4A.siGATA6	siNT	OK	17.7954	24.4357	0.45749	2.8997	5e-05	0.000386721
RAB31	chr18:9708227-9862553	siHNF4A.siGATA6	siNT	OK	1.47155	2.01788	0.455511	2.13757	0.00025	0.00166122
KIAA1551	chr12:32112352-32146043	siHNF4A.siGATA6	siNT	OK	6.65606	9.10087	0.451336	2.82224	5e-05	0.000386721
DENND1A	chr9:126141932-126692417	siHNF4A.siGATA6	siNT	OK	16.7652	22.9038	0.450117	2.46816	5e-05	0.000386721
FBLIM1	chr1:16085254-16113084	siHNF4A.siGATA6	siNT	OK	18.0742	24.6918	0.450103	2.79424	5e-05	0.000386721
ALDH2	chr12:112204690-112247789	siHNF4A.siGATA6	siNT	OK	148.752	202.977	0.448403	2.97889	5e-05	0.000386721
GPR160	chr3:169755734-169803183	siHNF4A.siGATA6	siNT	OK	12.8593	17.5381	0.447672	2.67691	5e-05	0.000386721
KLF4	chr9:110247132-110252047	siHNF4A.siGATA6	siNT	OK	26.8557	36.6209	0.447435	2.89042	5e-05	0.000386721
SPINT2	chr19:38755097-38783254	siHNF4A.siGATA6	siNT	OK	524.533	715.08	0.447073	2.92988	5e-05	0.000386721
TBC1D1	chr4:37892704-38140796	siHNF4A.siGATA6	siNT	OK	1.70063	2.3178	0.44669	2.31968	5e-05	0.000386721
PAQR5	chr15:69591293-69699976	siHNF4A.siGATA6	siNT	OK	0.955085	1.30126	0.446204	2.0055	0.00055	0.00333006
CAPG	chr2:85621870-85641197	siHNF4A.siGATA6	siNT	OK	75.2532	102.405	0.444455	2.86829	5e-05	0.000386721
BIRC3	chr11:102188180-102210135	siHNF4A.siGATA6	siNT	OK	1.43401	1.95001	0.443426	2.3287	5e-05	0.000386721
FOSB	chr19:45971252-45978437	siHNF4A.siGATA6	siNT	OK	0.830751	1.12544	0.438005	1.80159	0.00215	0.0107726
ATP1B1	chr1:169075946-169337186	siHNF4A.siGATA6	siNT	OK	465.446	630.4	0.437653	2.8502	5e-05	0.000386721
MCF2L-AS1	chr13:113621797-113622952	siHNF4A.siGATA6	siNT	OK	2.3332	3.15701	0.43625	1.63529	0.0053	0.0228622
ELOVL6	chr4:110970228-111119820	siHNF4A.siGATA6	siNT	OK	10.7348	14.5224	0.435979	2.68966	5e-05	0.000386721
ADAP1	chr7:937536-994289	siHNF4A.siGATA6	siNT	OK	61.444	83.1115	0.435776	2.86711	5e-05	0.000386721
SLC22A23	chr6:3269206-3456793	siHNF4A.siGATA6	siNT	OK	9.64991	13.0446	0.434863	2.77841	5e-05	0.000386721
FZD5	chr2:208627309-208634143	siHNF4A.siGATA6	siNT	OK	8.51313	11.4924	0.432921	2.76144	5e-05	0.000386721
LIG4	chr13:108859791-108870716	siHNF4A.siGATA6	siNT	OK	3.67749	4.95828	0.431118	2.42393	5e-05	0.000386721
HNF1A	chr12:121416548-121440314	siHNF4A.siGATA6	siNT	OK	9.70334	13.0787	0.430668	2.63171	5e-05	0.000386721
IL17RE	chr3:9944295-9958084	siHNF4A.siGATA6	siNT	OK	3.79031	5.10784	0.430395	2.25147	0.0001	0.000735824
ENC1	chr5:73923230-73937249	siHNF4A.siGATA6	siNT	OK	16.4938	22.1932	0.428193	2.78567	5e-05	0.000386721
ZFP36	chr19:39897486-39900052	siHNF4A.siGATA6	siNT	OK	25.5081	34.3206	0.42812	2.6779	5e-05	0.000386721
ACY1	chr3:52009041-52023218	siHNF4A.siGATA6	siNT	OK	28.8869	38.8118	0.42608	2.27866	5e-05	0.000386721
CXADR	chr21:18885223-18965897	siHNF4A.siGATA6	siNT	OK	7.87562	10.5814	0.426059	2.00358	0.0004	0.00252154
SAR1B	chr5:133936838-133968533	siHNF4A.siGATA6	siNT	OK	6.34058	8.51448	0.425303	2.66938	5e-05	0.000386721
NPAS2	chr2:101436612-101613287	siHNF4A.siGATA6	siNT	OK	7.55838	10.1478	0.425019	2.59265	5e-05	0.000386721
SMPD3	chr16:68392229-68482409	siHNF4A.siGATA6	siNT	OK	2.05359	2.75691	0.424903	2.26279	0.0002	0.00137159
VILL	chr3:38035077-38048676	siHNF4A.siGATA6	siNT	OK	23.9735	32.127	0.422349	2.7086	5e-05	0.000386721
RBM47	chr4:40425271-40631883	siHNF4A.siGATA6	siNT	OK	42.0268	56.3144	0.422194	2.77292	5e-05	0.000386721
AP1S3	chr2:224620046-224702319	siHNF4A.siGATA6	siNT	OK	11.0525	14.7971	0.420935	2.63629	5e-05	0.000386721
TMBIM1	chr2:219135114-219211516	siHNF4A.siGATA6	siNT	OK	134.81	180.417	0.420409	2.37829	5e-05	0.000386721
ST3GAL1	chr8:134467090-134584183	siHNF4A.siGATA6	siNT	OK	43.8719	58.7065	0.420223	2.78641	5e-05	0.000386721
DOK4	chr16:57496550-57520385	siHNF4A.siGATA6	siNT	OK	12.0298	16.0617	0.417017	1.71878	0.0024	0.0118199
SPATS2L	chr2:201170603-201346986	siHNF4A.siGATA6	siNT	OK	36.3003	48.3966	0.414926	2.75681	5e-05	0.000386721
CPD	chr17:28705941-28796675	siHNF4A.siGATA6	siNT	OK	36.2016	48.2646	0.41491	2.75845	5e-05	0.000386721
FAM105A	chr5:14581890-14616287	siHNF4A.siGATA6	siNT	OK	4.59497	6.10837	0.410731	2.52341	5e-05	0.000386721
PCDH7	chr4:30722029-31148423	siHNF4A.siGATA6	siNT	OK	10.73	14.244	0.408696	2.41352	5e-05	0.000386721
CERK	chr22:47080306-47134152	siHNF4A.siGATA6	siNT	OK	8.90856	11.8225	0.408271	2.54452	5e-05	0.000386721
NFE2L3	chr7:26191846-26226756	siHNF4A.siGATA6	siNT	OK	7.05354	9.35153	0.406855	2.44264	5e-05	0.000386721
CBLC	chr19:45281125-45303903	siHNF4A.siGATA6	siNT	OK	21.2112	28.1018	0.405833	2.48165	5e-05	0.000386721
CLIP2	chr7:73703804-73820273	siHNF4A.siGATA6	siNT	OK	25.485	33.6817	0.402317	2.6541	5e-05	0.000386721
MPZL3	chr11:118100335-118123011	siHNF4A.siGATA6	siNT	OK	11.3413	14.9763	0.401096	2.07698	0.0005	0.00306472
INPP4B	chr4:142949181-143767604	siHNF4A.siGATA6	siNT	OK	7.65876	10.1018	0.399428	2.44093	5e-05	0.000386721
AGFG2	chr7:100136833-100165843	siHNF4A.siGATA6	siNT	OK	15.2409	20.1003	0.39927	2.575	5e-05	0.000386721
TMEM181	chr6:158957467-159056467	siHNF4A.siGATA6	siNT	OK	10.3476	13.6435	0.39892	2.53984	5e-05	0.000386721
SFXN5	chr2:73169164-73298965	siHNF4A.siGATA6	siNT	OK	2.201	2.90097	0.398377	2.05349	0.00045	0.00279275
NDUFC2	chr11:77726760-77850699	siHNF4A.siGATA6	siNT	OK	84.4806	111.333	0.398185	2.12901	0.00015	0.00106581
AP1AR	chr4:113152894-113191211	siHNF4A.siGATA6	siNT	OK	21.3341	28.0878	0.396777	2.54638	5e-05	0.000386721
ZFAND3	chr6:37787306-38122399	siHNF4A.siGATA6	siNT	OK	27.904	36.7268	0.396363	2.57928	5e-05	0.000386721
TNIK	chr3:170780291-171178197	siHNF4A.siGATA6	siNT	OK	14.0386	18.4705	0.395827	1.85586	0.00215	0.0107726
XBP1	chr22:29190547-29196560	siHNF4A.siGATA6	siNT	OK	232.559	305.857	0.395259	2.63601	5e-05	0.000386721
PDLIM2	chr8:22436253-22455538	siHNF4A.siGATA6	siNT	OK	11.2606	14.8021	0.394516	2.26771	5e-05	0.000386721
ENDOD1	chr11:94822973-94865815	siHNF4A.siGATA6	siNT	OK	15.3546	20.1619	0.392964	2.53348	5e-05	0.000386721
PARD3	chr10:34398487-35104253	siHNF4A.siGATA6	siNT	OK	12.0879	15.8565	0.391512	2.36302	5e-05	0.000386721
EPHA4	chr2:222282746-222437010	siHNF4A.siGATA6	siNT	OK	2.22085	2.91163	0.390716	2.17797	0.00025	0.00166122
USP38	chr4:144106069-144143141	siHNF4A.siGATA6	siNT	OK	9.64272	12.6272	0.389025	2.46357	5e-05	0.000386721
CYCS	chr7:25158269-25164980	siHNF4A.siGATA6	siNT	OK	50.7907	66.2976	0.384392	2.55264	5e-05	0.000386721
MGAT3	chr22:39853324-39888199	siHNF4A.siGATA6	siNT	OK	14.2266	18.536	0.38174	2.44452	5e-05	0.000386721
ODC1	chr2:10580507-10588453	siHNF4A.siGATA6	siNT	OK	130.333	169.733	0.381065	2.52616	5e-05	0.000386721
LCOR	chr10:98592016-98724198	siHNF4A.siGATA6	siNT	OK	4.02413	5.24017	0.380939	2.28898	5e-05	0.000386721
EDEM3	chr1:184659624-184724041	siHNF4A.siGATA6	siNT	OK	16.3938	21.3372	0.380227	2.48768	5e-05	0.000386721
DPYSL2	chr8:26371708-26515693	siHNF4A.siGATA6	siNT	OK	52.9525	68.8775	0.379333	2.53294	5e-05	0.000386721
ANO5	chr11:22214721-22304913	siHNF4A.siGATA6	siNT	OK	1.56812	2.03901	0.378827	1.99541	0.00075	0.00433574

## Sheet: S5F siHNF4A+siGATA6 +1.3x
gene	locus	sample_1	sample_2	status	value_1	value_2	log2(fold_change)	test_stat	p_value	q_value	Direct +1.3x (n=198)
COMP	chr19:18893582-18902114	siHNF4A.siGATA6	siNT	OK	2.27339	0.209481	-3.43996	-7.73313	5e-05	0.000386721
UPK2	chr11:118827007-118829269	siHNF4A.siGATA6	siNT	OK	1.07084	0.105525	-3.34309	-2.59068	0.0034	0.0158513
PALMD	chr1:100111430-100231349	siHNF4A.siGATA6	siNT	OK	1.49891	0.327278	-2.19532	-3.09894	0.00015	0.00106581
WNT11	chr11:75897369-75917574	siHNF4A.siGATA6	siNT	OK	3.01025	0.686132	-2.13333	-7.11594	5e-05	0.000386721
BMF	chr15:40380090-40401085	siHNF4A.siGATA6	siNT	OK	18.5419	5.42231	-1.77381	-10.8579	5e-05	0.000386721
APCDD1	chr18:10454624-10488698	siHNF4A.siGATA6	siNT	OK	44.517	14.9726	-1.57203	-9.91159	5e-05	0.000386721
BTBD11	chr12:107712196-108053419	siHNF4A.siGATA6	siNT	OK	2.64569	0.900506	-1.55483	-7.18962	5e-05	0.000386721
FLJ22447	chr14:62037257-62121431	siHNF4A.siGATA6	siNT	OK	4.95917	1.72503	-1.52348	-5.85697	5e-05	0.000386721
ATP10B	chr5:159990126-160279219	siHNF4A.siGATA6	siNT	OK	2.31459	0.830886	-1.47804	-7.488	5e-05	0.000386721
KRT15	chr17:39669996-39675270	siHNF4A.siGATA6	siNT	OK	4.19793	1.55957	-1.42853	-5.95136	5e-05	0.000386721
CADM1	chr11:115044344-115375241	siHNF4A.siGATA6	siNT	OK	1.43795	0.548833	-1.38957	-5.47247	5e-05	0.000386721
RASSF10	chr11:13030969-13033653	siHNF4A.siGATA6	siNT	OK	13.9993	5.69871	-1.29665	-7.50313	5e-05	0.000386721
FAM3D	chr3:58619669-58652561	siHNF4A.siGATA6	siNT	OK	17.7494	7.38999	-1.26412	-6.71582	5e-05	0.000386721
CLIC5	chr6:45866189-46048085	siHNF4A.siGATA6	siNT	OK	4.1878	1.76373	-1.24757	-6.28535	5e-05	0.000386721
RCAN2	chr6:46188466-46459804	siHNF4A.siGATA6	siNT	OK	1.0155	0.434725	-1.22401	-3.97831	5e-05	0.000386721
LRIG1	chr3:66119284-66550845	siHNF4A.siGATA6	siNT	OK	7.32911	3.16717	-1.21045	-4.49948	5e-05	0.000386721
GATSL3	chr22:30681106-30685616	siHNF4A.siGATA6	siNT	OK	14.8789	6.48754	-1.19753	-6.48291	5e-05	0.000386721
CACNG4	chr17:64960979-65029518	siHNF4A.siGATA6	siNT	OK	9.57674	4.20524	-1.18735	-6.81301	5e-05	0.000386721
GPR110	chr6:46967812-47010082	siHNF4A.siGATA6	siNT	OK	73.5459	32.7366	-1.16774	-7.52762	5e-05	0.000386721
TRIM29	chr11:119981993-120008863	siHNF4A.siGATA6	siNT	OK	25.5202	11.4883	-1.15148	-7.19399	5e-05	0.000386721
NAALADL2	chr3:174577110-175523428	siHNF4A.siGATA6	siNT	OK	5.44934	2.52373	-1.11053	-6.23668	5e-05	0.000386721
PLEKHB1	chr11:73357222-73373864	siHNF4A.siGATA6	siNT	OK	57.6118	28.3517	-1.02293	-6.56112	5e-05	0.000386721
ANK3	chr10:61786055-62493284	siHNF4A.siGATA6	siNT	OK	9.71753	4.78625	-1.0217	-6.38172	5e-05	0.000386721
KRT17	chr17:39775691-39780882	siHNF4A.siGATA6	siNT	OK	40.5583	19.9931	-1.02049	-6.24496	5e-05	0.000386721
SPTSSB	chr3:161062579-161089871	siHNF4A.siGATA6	siNT	OK	26.6659	13.1875	-1.01582	-6.26211	5e-05	0.000386721
NAV2	chr11:19372270-20143147	siHNF4A.siGATA6	siNT	OK	5.77471	2.89921	-0.994086	-5.94068	5e-05	0.000386721
NFATC4	chr14:24836144-24848810	siHNF4A.siGATA6	siNT	OK	1.1951	0.609149	-0.972263	-3.97172	5e-05	0.000386721
CTGF	chr6:132269316-132272518	siHNF4A.siGATA6	siNT	OK	11.2662	5.78701	-0.961111	-5.40375	5e-05	0.000386721
STARD13	chr13:33677271-34250932	siHNF4A.siGATA6	siNT	OK	2.02948	1.06158	-0.934894	-4.5087	5e-05	0.000386721
CXCL1	chr4:74735108-74737019	siHNF4A.siGATA6	siNT	OK	11.2296	5.88938	-0.931114	-4.5108	5e-05	0.000386721
BFSP1	chr20:17474549-17539605	siHNF4A.siGATA6	siNT	OK	4.08392	2.24576	-0.86275	-3.97374	5e-05	0.000386721
ARRDC3	chr5:90664540-90716532	siHNF4A.siGATA6	siNT	OK	7.0145	3.87005	-0.857988	-4.9016	5e-05	0.000386721
PIK3R3	chr1:46505811-46598708	siHNF4A.siGATA6	siNT	OK	3.77188	2.0965	-0.8473	-4.70921	5e-05	0.000386721
SERINC5	chr5:79407049-79551898	siHNF4A.siGATA6	siNT	OK	23.9092	13.3326	-0.842605	-5.11107	5e-05	0.000386721
ELOVL5	chr6:53132195-53213977	siHNF4A.siGATA6	siNT	OK	4.79804	2.69048	-0.834583	-4.16612	5e-05	0.000386721
TSPAN5	chr4:99391517-99579812	siHNF4A.siGATA6	siNT	OK	26.7298	15.0134	-0.832202	-5.29909	5e-05	0.000386721
DENND3	chr8:142138719-142205900	siHNF4A.siGATA6	siNT	OK	3.41711	1.93452	-0.820796	-4.44796	5e-05	0.000386721
SEMA3C	chr7:80371853-80548667	siHNF4A.siGATA6	siNT	OK	15.2215	8.69823	-0.807317	-5.11183	5e-05	0.000386721
PMEPA1	chr20:56223447-56286592	siHNF4A.siGATA6	siNT	OK	12.0034	6.86517	-0.806073	-4.97893	5e-05	0.000386721
NTN4	chr12:96043030-96184536	siHNF4A.siGATA6	siNT	OK	11.8809	6.80182	-0.804655	-4.85451	5e-05	0.000386721
HMGCS2	chr1:120290618-120311555	siHNF4A.siGATA6	siNT	OK	86.2136	49.4745	-0.801232	-5.25563	5e-05	0.000386721
FOXL1	chr16:86612114-86615304	siHNF4A.siGATA6	siNT	OK	1.12404	0.645396	-0.800436	-2.95183	5e-05	0.000386721
ALCAM	chr3:105085556-105295757	siHNF4A.siGATA6	siNT	OK	103.412	59.4804	-0.79792	-5.29256	5e-05	0.000386721
INHBB	chr2:121103718-121109383	siHNF4A.siGATA6	siNT	OK	16.4882	9.49745	-0.795823	-4.89084	5e-05	0.000386721
SLC5A1	chr22:32439018-32509011	siHNF4A.siGATA6	siNT	OK	29.1725	16.805	-0.795718	-5.18459	5e-05	0.000386721
GLCE	chr15:69116302-69564544	siHNF4A.siGATA6	siNT	OK	8.12717	4.70192	-0.789504	-4.11523	5e-05	0.000386721
PCMTD1	chr8:52730139-52811735	siHNF4A.siGATA6	siNT	OK	10.3303	6.00089	-0.78363	-4.73993	5e-05	0.000386721
BCL2L11	chr2:111878490-111926022	siHNF4A.siGATA6	siNT	OK	7.31998	4.26717	-0.778561	-2.98982	5e-05	0.000386721
MMD	chr17:53469973-53499341	siHNF4A.siGATA6	siNT	OK	3.6507	2.14157	-0.769503	-3.6576	5e-05	0.000386721
FBXO32	chr8:124510126-124553493	siHNF4A.siGATA6	siNT	OK	1.62101	0.96476	-0.748652	-3.70633	5e-05	0.000386721
WEE1	chr11:9595227-9611313	siHNF4A.siGATA6	siNT	OK	32.8469	19.557	-0.748073	-4.81813	5e-05	0.000386721
PBX1	chr1:164528596-164821060	siHNF4A.siGATA6	siNT	OK	4.58777	2.73663	-0.745393	-4.12356	5e-05	0.000386721
TMCC1	chr3:129366634-129612419	siHNF4A.siGATA6	siNT	OK	6.28305	3.76307	-0.739556	-4.42943	5e-05	0.000386721
SH3PXD2A	chr10:105353783-105615164	siHNF4A.siGATA6	siNT	OK	8.69371	5.2151	-0.737278	-4.71034	5e-05	0.000386721
GSN	chr9:124030379-124095120	siHNF4A.siGATA6	siNT	OK	79.3287	47.6454	-0.735506	-4.84081	5e-05	0.000386721
ANXA1	chr9:75766780-75785307	siHNF4A.siGATA6	siNT	OK	300.138	180.451	-0.734018	-4.87174	5e-05	0.000386721
FNIP2	chr4:159690181-159956333	siHNF4A.siGATA6	siNT	OK	13.0086	7.82931	-0.732505	-4.63747	5e-05	0.000386721
PRDM1	chr6:106534194-106557814	siHNF4A.siGATA6	siNT	OK	1.16549	0.702393	-0.730582	-3.16641	5e-05	0.000386721
ZNF704	chr8:81540685-81787016	siHNF4A.siGATA6	siNT	OK	5.09959	3.08324	-0.725937	-4.59305	5e-05	0.000386721
DUSP10	chr1:221874763-221915516	siHNF4A.siGATA6	siNT	OK	3.29897	1.99543	-0.725315	-3.34055	5e-05	0.000386721
ZKSCAN1	chr7:99613218-99635403	siHNF4A.siGATA6	siNT	OK	23.6647	14.5077	-0.705915	-4.5854	5e-05	0.000386721
ZNRF3	chr22:29279754-29453476	siHNF4A.siGATA6	siNT	OK	11.5324	7.07678	-0.704534	-4.47201	5e-05	0.000386721
CLDN3	chr7:73183326-73184600	siHNF4A.siGATA6	siNT	OK	42.6339	26.163	-0.704473	-4.31216	5e-05	0.000386721
BHLHE41	chr12:26272958-26278003	siHNF4A.siGATA6	siNT	OK	4.37737	2.70192	-0.69608	-3.72001	5e-05	0.000386721
SPNS2	chr17:4402128-4458681	siHNF4A.siGATA6	siNT	OK	26.9289	16.6594	-0.692817	-3.53547	5e-05	0.000386721
IER5	chr1:181057637-181059979	siHNF4A.siGATA6	siNT	OK	27.6702	17.1554	-0.689667	-4.31239	5e-05	0.000386721
CYR61	chr1:86046443-86049648	siHNF4A.siGATA6	siNT	OK	3.40776	2.11286	-0.689624	-3.13475	5e-05	0.000386721
THBS1	chr15:39873279-39889668	siHNF4A.siGATA6	siNT	OK	24.5862	15.2509	-0.688956	-4.48756	5e-05	0.000386721
MAFB	chr20:39314516-39317876	siHNF4A.siGATA6	siNT	OK	6.35601	3.94773	-0.687096	-3.82091	5e-05	0.000386721
MBOAT2	chr2:8996700-9143876	siHNF4A.siGATA6	siNT	OK	8.70808	5.4222	-0.683478	-4.03725	5e-05	0.000386721
TFAP2C	chr20:55204357-55214338	siHNF4A.siGATA6	siNT	OK	9.43866	5.89855	-0.678222	-3.89994	5e-05	0.000386721
TBC1D2	chr9:100961279-101018003	siHNF4A.siGATA6	siNT	OK	7.19095	4.53162	-0.666154	-3.75836	5e-05	0.000386721
ACSL5	chr10:114133915-114188138	siHNF4A.siGATA6	siNT	OK	15.3365	9.70834	-0.659672	-4.06384	5e-05	0.000386721
OXR1	chr8:107282405-107764921	siHNF4A.siGATA6	siNT	OK	26.5588	16.8167	-0.659294	-4.24271	5e-05	0.000386721
TGFBI	chr5:135364583-135399507	siHNF4A.siGATA6	siNT	OK	4.87888	3.10596	-0.651512	-3.36006	5e-05	0.000386721
HEXIM2	chr17:43238263-43247406	siHNF4A.siGATA6	siNT	OK	4.50264	2.8743	-0.647562	-2.74731	5e-05	0.000386721
CRY2	chr11:45868668-45904799	siHNF4A.siGATA6	siNT	OK	12.5412	8.01821	-0.645321	-3.99229	5e-05	0.000386721
KLHL24	chr3:183353410-183402304	siHNF4A.siGATA6	siNT	OK	4.17727	2.67151	-0.644906	-3.79224	5e-05	0.000386721
GATS	chr7:99775537-99869855	siHNF4A.siGATA6	siNT	OK	7.31556	4.68021	-0.644396	-3.58741	5e-05	0.000386721
GAN	chr16:81348570-81413803	siHNF4A.siGATA6	siNT	OK	5.62649	3.61008	-0.640203	-3.67939	5e-05	0.000386721
GTF2IRD1	chr7:73868119-74016920	siHNF4A.siGATA6	siNT	OK	17.1119	11.0011	-0.637347	-3.97627	5e-05	0.000386721
NRIP1	chr21:16333555-16437126	siHNF4A.siGATA6	siNT	OK	10.34	6.65002	-0.636811	-4.05005	5e-05	0.000386721
ABHD2	chr15:89631380-89745591	siHNF4A.siGATA6	siNT	OK	58.0053	37.3459	-0.635235	-4.22661	5e-05	0.000386721
RNF43	chr17:56378587-56494931	siHNF4A.siGATA6	siNT	OK	43.9057	28.3992	-0.628558	-3.47596	5e-05	0.000386721
MTUS1	chr8:17501302-17658426	siHNF4A.siGATA6	siNT	OK	49.5277	32.1264	-0.624475	-3.97482	5e-05	0.000386721
PAX9	chr14:37126772-37147011	siHNF4A.siGATA6	siNT	OK	1.76482	1.14733	-0.62125	-2.65644	5e-05	0.000386721
NUAK2	chr1:205271190-205290883	siHNF4A.siGATA6	siNT	OK	4.2755	2.79041	-0.615616	-3.22655	5e-05	0.000386721
TGFBR2	chr3:30647993-30735633	siHNF4A.siGATA6	siNT	OK	63.939	41.8862	-0.61022	-4.05696	5e-05	0.000386721
BMP4	chr14:54416454-54423554	siHNF4A.siGATA6	siNT	OK	149.139	97.8708	-0.607704	-4.00901	5e-05	0.000386721
NES	chr1:156638555-156647189	siHNF4A.siGATA6	siNT	OK	8.16649	5.36979	-0.604852	-3.70452	5e-05	0.000386721
TMEM194B	chr2:191371618-191399468	siHNF4A.siGATA6	siNT	OK	2.72207	1.79483	-0.600856	-2.90891	5e-05	0.000386721
DEFB1	chr8:6728096-6735529	siHNF4A.siGATA6	siNT	OK	6.14455	4.06862	-0.594769	-1.66544	0.0043	0.0192793
HBP1	chr7:106809405-107218968	siHNF4A.siGATA6	siNT	OK	15.9032	10.5566	-0.591172	-2.03945	0.00055	0.00333006
MACROD2	chr20:13976145-16033841	siHNF4A.siGATA6	siNT	OK	3.07539	2.05156	-0.58405	-1.87214	0.00175	0.00905359
B4GALT5	chr20:48249482-48330421	siHNF4A.siGATA6	siNT	OK	34.0549	22.7328	-0.583084	-3.81892	5e-05	0.000386721
TRPS1	chr8:116420723-116681228	siHNF4A.siGATA6	siNT	OK	1.4157	0.947127	-0.579886	-3.04943	5e-05	0.000386721
ABLIM2	chr4:7967036-8160559	siHNF4A.siGATA6	siNT	OK	2.65797	1.77839	-0.579749	-2.57284	5e-05	0.000386721
FAIM2	chr12:50260678-50297760	siHNF4A.siGATA6	siNT	OK	6.10942	4.0922	-0.578158	-3.37105	5e-05	0.000386721
SCNN1A	chr12:6456008-6500737	siHNF4A.siGATA6	siNT	OK	66.8906	44.8309	-0.57731	-2.78431	5e-05	0.000386721
ROBO1	chr3:78646387-79817059	siHNF4A.siGATA6	siNT	OK	6.71515	4.50934	-0.574502	-3.49834	5e-05	0.000386721
SORBS1	chr10:97071529-97321171	siHNF4A.siGATA6	siNT	OK	2.43548	1.63665	-0.573462	-2.982	5e-05	0.000386721
FAM133B	chr7:92190071-92219706	siHNF4A.siGATA6	siNT	OK	8.08343	5.46031	-0.565984	-2.73646	5e-05	0.000386721
TLE1	chr9:84198597-84303596	siHNF4A.siGATA6	siNT	OK	23.8209	16.1266	-0.562782	-3.57994	5e-05	0.000386721
BTBD3	chr20:11871476-11907243	siHNF4A.siGATA6	siNT	OK	29.0107	19.7171	-0.557133	-3.6388	5e-05	0.000386721
PMAIP1	chr18:57567191-57571538	siHNF4A.siGATA6	siNT	OK	2.34586	1.59722	-0.554556	-2.25521	0.00015	0.00106581
MAP3K9	chr14:71194853-71275888	siHNF4A.siGATA6	siNT	OK	5.03368	3.43045	-0.553217	-3.23358	5e-05	0.000386721
RABGAP1	chr9:125703287-125867147	siHNF4A.siGATA6	siNT	OK	42.967	29.4455	-0.545184	-3.59756	5e-05	0.000386721
KIAA0195	chr17:73452663-73511627	siHNF4A.siGATA6	siNT	OK	11.5291	7.91497	-0.542626	-2.58691	5e-05	0.000386721
ASAP1	chr8:131064350-131455906	siHNF4A.siGATA6	siNT	OK	14.9627	10.274	-0.542376	-3.46936	5e-05	0.000386721
TNRC6B	chr22:40440820-40731812	siHNF4A.siGATA6	siNT	OK	4.00123	2.75265	-0.539625	-3.4062	5e-05	0.000386721
CUEDC1	chr17:55938603-56032684	siHNF4A.siGATA6	siNT	OK	17.2407	11.9035	-0.534426	-3.36982	5e-05	0.000386721
GADD45B	chr19:2476122-2478257	siHNF4A.siGATA6	siNT	OK	9.55466	6.60775	-0.532046	-2.70134	5e-05	0.000386721
HIVEP3	chr1:41972035-42501596	siHNF4A.siGATA6	siNT	OK	4.31798	2.9873	-0.531514	-1.80639	0.00235	0.0115967
ARHGEF28	chr5:72921982-73237818	siHNF4A.siGATA6	siNT	OK	4.37049	3.02613	-0.53032	-3.06672	5e-05	0.000386721
PAG1	chr8:81880045-82024303	siHNF4A.siGATA6	siNT	OK	6.19471	4.29405	-0.5287	-3.34176	5e-05	0.000386721
GADD45G	chr9:92219926-92221469	siHNF4A.siGATA6	siNT	OK	5.51893	3.82843	-0.527637	-2.23166	0.00025	0.00166122
PROX1	chr1:214161277-214214847	siHNF4A.siGATA6	siNT	OK	1.64827	1.14692	-0.523189	-2.76605	5e-05	0.000386721
NCOA3	chr20:46130600-46285621	siHNF4A.siGATA6	siNT	OK	16.4461	11.4521	-0.522138	-3.42544	5e-05	0.000386721
ZNF367	chr9:99148224-99180669	siHNF4A.siGATA6	siNT	OK	34.2911	23.884	-0.521791	-3.39384	5e-05	0.000386721
PHACTR2	chr6:143929316-144152322	siHNF4A.siGATA6	siNT	OK	8.7748	6.12467	-0.518734	-3.32383	5e-05	0.000386721
PCNXL2	chr1:233119881-233431459	siHNF4A.siGATA6	siNT	OK	2.34021	1.63813	-0.514584	-2.78085	5e-05	0.000386721
RND3	chr2:151324706-151344209	siHNF4A.siGATA6	siNT	OK	26.0182	18.2278	-0.513384	-3.25102	5e-05	0.000386721
SPIRE1	chr18:12446510-12657912	siHNF4A.siGATA6	siNT	OK	7.97808	5.592	-0.512678	-3.14954	5e-05	0.000386721
ABLIM1	chr10:116190868-116444414	siHNF4A.siGATA6	siNT	OK	92.8948	65.1843	-0.511073	-3.39234	5e-05	0.000386721
E2F7	chr12:77415025-77459360	siHNF4A.siGATA6	siNT	OK	8.01773	5.63703	-0.50826	-3.12925	5e-05	0.000386721
ARHGEF3	chr3:56761445-57113336	siHNF4A.siGATA6	siNT	OK	14.7605	10.3863	-0.507053	-3.16394	5e-05	0.000386721
ATL1	chr14:50999799-51099784	siHNF4A.siGATA6	siNT	OK	1.21549	0.85609	-0.505707	-1.86743	0.0013	0.00696665
CCNG2	chr4:78078356-78091213	siHNF4A.siGATA6	siNT	OK	5.68619	4.01243	-0.502985	-2.98053	5e-05	0.000386721
EDN1	chr6:12290528-12297427	siHNF4A.siGATA6	siNT	OK	1.77176	1.25164	-0.501369	-1.93006	0.001	0.00554087
SEPP1	chr5:42756919-42812024	siHNF4A.siGATA6	siNT	OK	7.04	4.97624	-0.500521	-2.61302	5e-05	0.000386721
SCML1	chrX:17755591-17773105	siHNF4A.siGATA6	siNT	OK	11.6753	8.25296	-0.500471	-2.91944	5e-05	0.000386721
PTGES	chr9:132500614-132515344	siHNF4A.siGATA6	siNT	OK	56.684	40.2497	-0.493965	-3.17083	5e-05	0.000386721
SGSM2	chr17:2240805-2284348	siHNF4A.siGATA6	siNT	OK	7.37742	5.24078	-0.493335	-2.95731	5e-05	0.000386721
TRIM2	chr4:154074269-154260474	siHNF4A.siGATA6	siNT	OK	33.0456	23.4833	-0.492827	-3.28377	5e-05	0.000386721
FOXA1	chr14:38058756-38064325	siHNF4A.siGATA6	siNT	OK	38.5521	27.4407	-0.490495	-3.19435	5e-05	0.000386721
ACTN1	chr14:69340839-69446083	siHNF4A.siGATA6	siNT	OK	129.897	92.4865	-0.490051	-3.25872	5e-05	0.000386721
SNTB1	chr8:121547984-121824309	siHNF4A.siGATA6	siNT	OK	78.0615	55.616	-0.489111	-3.25101	5e-05	0.000386721
TTC39B	chr9:15170841-15307358	siHNF4A.siGATA6	siNT	OK	8.79809	6.28155	-0.486071	-2.84674	5e-05	0.000386721
DHRS12	chr13:52342128-52378298	siHNF4A.siGATA6	siNT	OK	8.50605	6.07427	-0.485779	-2.34179	0.0001	0.000735824
LYPD6	chr2:150186498-150330659	siHNF4A.siGATA6	siNT	OK	1.93209	1.38033	-0.485146	-2.2557	5e-05	0.000386721
EPHB1	chr3:134514098-134979307	siHNF4A.siGATA6	siNT	OK	1.16089	0.830201	-0.4837	-2.12026	0.00025	0.00166122
UTRN	chr6:144612872-145174170	siHNF4A.siGATA6	siNT	OK	6.39667	4.58508	-0.480374	-3.06697	5e-05	0.000386721
SYBU	chr8:110586404-110704020	siHNF4A.siGATA6	siNT	OK	4.0859	2.93055	-0.479482	-2.35006	5e-05	0.000386721
SPRY1	chr4:124317949-124324915	siHNF4A.siGATA6	siNT	OK	16.6354	11.9372	-0.478797	-2.90561	5e-05	0.000386721
KIF16B	chr20:16252748-16554079	siHNF4A.siGATA6	siNT	OK	23.0156	16.5272	-0.47777	-3.07772	5e-05	0.000386721
PTPRJ	chr11:48002109-48192394	siHNF4A.siGATA6	siNT	OK	28.3245	20.3513	-0.476928	-3.11806	5e-05	0.000386721
PVRL4	chr1:161040780-161059385	siHNF4A.siGATA6	siNT	OK	24.3782	17.5825	-0.471451	-3.01896	5e-05	0.000386721
NT5E	chr6:86159301-86205509	siHNF4A.siGATA6	siNT	OK	4.65022	3.35411	-0.471371	-2.61339	5e-05	0.000386721
SRGAP1	chr12:64238540-64541613	siHNF4A.siGATA6	siNT	OK	3.8116	2.75044	-0.470734	-2.81002	5e-05	0.000386721
TSC22D1	chr13:45006278-45154568	siHNF4A.siGATA6	siNT	OK	88.1179	63.6207	-0.469938	-3.05312	5e-05	0.000386721
RAPGEF4	chr2:173587917-173917620	siHNF4A.siGATA6	siNT	OK	2.63756	1.90751	-0.467515	-2.37232	0.0001	0.000735824
LURAP1L	chr9:12775011-12823059	siHNF4A.siGATA6	siNT	OK	8.52006	6.16322	-0.467179	-2.65703	5e-05	0.000386721
RAB40B	chr17:80614942-80656598	siHNF4A.siGATA6	siNT	OK	68.6756	49.7018	-0.466499	-3.02405	5e-05	0.000386721
KLK6	chr19:51461886-51472929	siHNF4A.siGATA6	siNT	OK	180	130.4	-0.46505	-3.06375	5e-05	0.000386721
SLC30A1	chr1:211748380-211752099	siHNF4A.siGATA6	siNT	OK	20.3963	14.7788	-0.464778	-2.81545	5e-05	0.000386721
ESYT2	chr7:158523688-158622319	siHNF4A.siGATA6	siNT	OK	35.5983	25.8578	-0.461207	-3.04494	5e-05	0.000386721
LIF	chr22:30636435-30642840	siHNF4A.siGATA6	siNT	OK	7.98169	5.8005	-0.460518	-2.74803	5e-05	0.000386721
IGFBP3	chr7:45951843-45960871	siHNF4A.siGATA6	siNT	OK	1.84277	1.34598	-0.453221	-1.90812	0.0008	0.00457153
MGAT5	chr2:135011829-135212192	siHNF4A.siGATA6	siNT	OK	27.6919	20.26	-0.450827	-2.97996	5e-05	0.000386721
NLK	chr17:26369687-26523404	siHNF4A.siGATA6	siNT	OK	9.3636	6.85342	-0.450238	-2.68733	5e-05	0.000386721
TMEM143	chr19:48835615-48867186	siHNF4A.siGATA6	siNT	OK	6.03128	4.42125	-0.44801	-2.33578	5e-05	0.000386721
TNS3	chr7:47314751-47621742	siHNF4A.siGATA6	siNT	OK	31.3864	23.0339	-0.446381	-2.95303	5e-05	0.000386721
NET1	chr10:5454513-5501019	siHNF4A.siGATA6	siNT	OK	101.755	74.7487	-0.444985	-2.96985	5e-05	0.000386721
GLCCI1	chr7:8008373-8128709	siHNF4A.siGATA6	siNT	OK	1.43814	1.05723	-0.443912	-2.01827	0.0004	0.00252154
KCNAB1	chr3:155838336-156256927	siHNF4A.siGATA6	siNT	OK	1.55557	1.14505	-0.44204	-1.93427	0.0008	0.00457153
NFKBIA	chr14:35870715-35873960	siHNF4A.siGATA6	siNT	OK	41.0394	30.2595	-0.439623	-2.75856	5e-05	0.000386721
SGK223	chr8:8175257-8239257	siHNF4A.siGATA6	siNT	OK	27.6981	20.4487	-0.437775	-2.85316	5e-05	0.000386721
IRS2	chr13:110406183-110438914	siHNF4A.siGATA6	siNT	OK	5.32476	3.94833	-0.431474	-2.61248	5e-05	0.000386721
RNASEL	chr1:182542768-182558394	siHNF4A.siGATA6	siNT	OK	7.33365	5.44308	-0.430108	-2.55507	5e-05	0.000386721
CHD6	chr20:40031169-40247133	siHNF4A.siGATA6	siNT	OK	3.07614	2.28362	-0.429801	-2.56716	5e-05	0.000386721
PLEKHG1	chr6:150920998-151164799	siHNF4A.siGATA6	siNT	OK	5.01039	3.72122	-0.429148	-2.5943	5e-05	0.000386721
PPP1R3B	chr8:8993763-9009152	siHNF4A.siGATA6	siNT	OK	9.56241	7.10892	-0.427744	-2.67211	5e-05	0.000386721
WDFY2	chr13:52158483-52336171	siHNF4A.siGATA6	siNT	OK	4.8924	3.64059	-0.42637	-2.36581	5e-05	0.000386721
MKL2	chr16:14165195-14360630	siHNF4A.siGATA6	siNT	OK	4.58319	3.42416	-0.420602	-2.56548	5e-05	0.000386721
STBD1	chr4:77135192-77232283	siHNF4A.siGATA6	siNT	OK	9.65537	7.2211	-0.419112	-1.87079	0.0013	0.00696665
PDGFB	chr22:39619684-39640957	siHNF4A.siGATA6	siNT	OK	5.79454	4.34394	-0.415689	-2.16976	0.0002	0.00137159
CCND3	chr6:41902670-42016610	siHNF4A.siGATA6	siNT	OK	235.193	176.498	-0.414194	-2.73616	5e-05	0.000386721
RUNX2	chr6:44794466-45518819	siHNF4A.siGATA6	siNT	OK	4.29653	3.22847	-0.412323	-1.7363	0.00275	0.0132594
SNN	chr16:11762288-11836648	siHNF4A.siGATA6	siNT	OK	7.48133	5.64947	-0.405178	-1.53571	0.00875	0.0345269
SPTBN2	chr11:66452719-66488870	siHNF4A.siGATA6	siNT	OK	25.369	19.1799	-0.403469	-2.66086	5e-05	0.000386721
DKK1	chr10:54074040-54077417	siHNF4A.siGATA6	siNT	OK	7.18026	5.42902	-0.403343	-2.07791	0.00035	0.00224282
CENPF	chr1:214776531-214837914	siHNF4A.siGATA6	siNT	OK	15.76	11.9196	-0.40294	-2.63427	5e-05	0.000386721
SHF	chr15:45459411-45493373	siHNF4A.siGATA6	siNT	OK	3.80393	2.87834	-0.402252	-1.95709	0.00075	0.00433574
CNEP1R1	chr16:50059188-50070999	siHNF4A.siGATA6	siNT	OK	4.41025	3.33915	-0.401379	-1.93244	0.0006	0.00357865
SLC9A4	chr2:103089761-103150431	siHNF4A.siGATA6	siNT	OK	7.18823	5.44454	-0.400825	-2.36311	5e-05	0.000386721
GPR157	chr1:9164475-9189229	siHNF4A.siGATA6	siNT	OK	4.30807	3.26878	-0.398289	-1.66162	0.0048	0.0210643
CPLX2	chr5:175223609-175311023	siHNF4A.siGATA6	siNT	OK	15.5627	11.8438	-0.393959	-2.50377	5e-05	0.000386721
CELSR1	chr22:46756730-46933067	siHNF4A.siGATA6	siNT	OK	4.88558	3.72466	-0.391422	-2.44948	5e-05	0.000386721
TBC1D19	chr4:26585545-26756918	siHNF4A.siGATA6	siNT	OK	1.86432	1.422	-0.390726	-1.60504	0.0062	0.026056
MVB12B	chr9:129089122-129269320	siHNF4A.siGATA6	siNT	OK	1.27587	0.973225	-0.390632	-1.69114	0.00295	0.0140815
ZFYVE19	chr15:41060066-41106767	siHNF4A.siGATA6	siNT	OK	15.1112	11.5594	-0.38656	-1.93301	0.001	0.00554087
ZFP36L1	chr14:69254371-69262960	siHNF4A.siGATA6	siNT	OK	76.2392	58.3399	-0.386051	-2.55518	5e-05	0.000386721
LRRC8A	chr9:131644390-131680317	siHNF4A.siGATA6	siNT	OK	52.0435	39.8335	-0.385735	-2.55421	5e-05	0.000386721
FYN	chr6:111981534-112194655	siHNF4A.siGATA6	siNT	OK	6.21999	4.76147	-0.385505	-2.18207	5e-05	0.000386721
MCF2L	chr13:113623534-113754053	siHNF4A.siGATA6	siNT	OK	14.0909	10.7886	-0.385261	-2.4817	5e-05	0.000386721
WNK1	chr12:862088-1020618	siHNF4A.siGATA6	siNT	OK	30.5467	23.4322	-0.382524	-2.53072	5e-05	0.000386721
FDFT1	chr8:11660189-11696818	siHNF4A.siGATA6	siNT	OK	127.818	98.1892	-0.380451	-2.52037	5e-05	0.000386721
NR2F2	chr15:96869156-96883492	siHNF4A.siGATA6	siNT	OK	37.8451	29.0892	-0.379624	-2.45255	5e-05	0.000386721
