# Supplementary material for: Identification of a primitive intestinal transcription factor network shared between esophageal adenocarcinoma and its precancerous precursor state
Source: Genome Res. 2019 May;29(5):723–36. doi: 10.1101/gr.243345.118 (PMC6499311; doi:10.1101/gr.243345.118)
Supplement: Supplemental Material [file supp_gr.243345.118_Supplemental_Table_S6.xlsx]

## Sheet: Legend
Table S6. Differentially accessible regions in Barrett’s patient samples. (A) Coordinates of the top 50,000 genomic regions showing accessibility across normal and Barrett’s samples. (B and C) Coordinates of regions showing >5 fold increase or decrease in accessibility when comparing the average signal in Barrett’s samples B_001-4 to normal tissue N_003, N_005 and N_006 among these 50,000 regions…

## Sheet: S6A Top 50,000 regions
Chr	Start	End
chr1	143913202	143913702
chr20	26188806	26189306
chr4	166248419	166248919
chr16	14580678	14581178
chr20	26188627	26189127
chr21	15755377	15755877
chr3	93698647	93699147
chr3	98620422	98620922
chr8	25315861	25316361
chr8	67579331	67579831
chr10	16859300	16859800
chr3	131100254	131100754
chr11	6255893	6256393
chr2	676658	677158
chr4	83205958	83206458
chr1	244815902	244816402
chr1	171750305	171750805
chr5	41904014	41904514
chr8	110346215	110346715
chr3	33481770	33482270
chr2	163200300	163200800
chr13	50018091	50018591
chr1	120838439	120838939
chr4	141444965	141445465
chr2	176032869	176033369
chr14	53019141	53019641
chr7	36192381	36192881
chr20	26189788	26190288
chr3	98241605	98242105
chr1	85742090	85742590
chr1	184723875	184724375
chr11	105892879	105893379
chr8	74884345	74884845
chr8	110551612	110552112
chr18	11980869	11981369
chr11	125462292	125462792
chr11	43701885	43702385
chr11	124981430	124981930
chr2	54950353	54950853
chr2	197504072	197504572
chr6	20401689	20402189
chr2	48541249	48541749
chr6	75994389	75994889
chr5	108084328	108084828
chr7	112579802	112580302
chr5	137667407	137667907
chr14	82000115	82000615
chr11	94964324	94964824
chr10	28591884	28592384
chr16	81129863	81130363
chr4	159593041	159593541
chr1	206137882	206138382
chr16	5147905	5148405
chr6	122720406	122720906
chr2	198317884	198318384
chr5	168006527	168007027
chr7	106808874	106809374
chr6	151773179	151773679
chr1	241682878	241683378
chr1	170043620	170044120
chr2	30369274	30369774
chr3	75484343	75484843
chr9	104160769	104161269
chr12	88535742	88536242
chr4	52708925	52709425
chr10	91461010	91461510
chr2	105654201	105654701
chr5	36151852	36152352
chr5	74632628	74633128
chr5	34929254	34929754
chr8	73920753	73921253
chr9	102861168	102861668
chr15	49912911	49913411
chr1	186344256	186344756
chr7	134331200	134331700
chr16	50775592	50776092
chr5	150632300	150632800
chr3	43663486	43663986
chr14	59655036	59655536
chr5	145562024	145562524
chr6	80816064	80816564
chr15	98503432	98503932
chr3	172468176	172468676
chr6	116892229	116892729
chr2	208576012	208576512
chr7	92861353	92861853
chr3	179280360	179280860
chr1	185125996	185126496
chr7	11013128	11013628
chr16	77224494	77224994
chr5	102594072	102594572
chr6	80714006	80714506
chr8	57123798	57124298
chr10	25305237	25305737
chr1	65885818	65886318
chr15	49103148	49103648
chr5	122758912	122759412
chr3	113415437	113415937
chr3	167452561	167453061
chr1	244615074	244615574
chr4	39183750	39184250
chr3	88107945	88108445
chr10	112678851	112679351
chr16	53737614	53738114
chr11	105948004	105948504
chr9	82186433	82186933
chr1	221915305	221915805
chr11	85339259	85339759
chr1	243418990	243419490
chr11	82867632	82868132
chr14	66974475	66974975
chr5	151151094	151151594
chr7	92157739	92158239
chr4	123653457	123653957
chr2	88990863	88991363
chr3	67048321	67048821
chr8	92082229	92082729
chr1	9970373	9970873
chr10	27792877	27793377
chr7	42971641	42972141
chr13	98085224	98085724
chr4	53578246	53578746
chr3	66551328	66551828
chr8	41347745	41348245
chr7	127291833	127292333
chr3	99979481	99979981
chr1	89458440	89458940
chr1	227127581	227128081
chr8	103251200	103251700
chr14	78083016	78083516
chr10	58120880	58121380
chr12	39836888	39837388
chr7	102389050	102389550
chr8	38853923	38854423
chr6	151711408	151711908
chr2	65357124	65357624
chr12	54121115	54121615
chr6	56954595	56955095
chr13	53226627	53227127
chr7	148725582	148726082
chr5	114880251	114880751
chr18	48724003	48724503
chr1	228327527	228328027
chr4	108641316	108641816
chr5	5422157	5422657
chr3	5229025	5229525
chr5	34915461	34915961
chr7	94287106	94287606
chr6	167040706	167041206
chr12	75784646	75785146
chr8	77912229	77912729
chr5	86708558	86709058
chr1	244211455	244211955
chr3	113775196	113775696
chr13	96328978	96329478
chr2	64977994	64978494
chr7	137686826	137687326
chr9	123630820	123631320
chr14	20929649	20930149
chr1	164527919	164528419
chr3	120461200	120461700
chr19	42772887	42773387
chr1	151254359	151254859
chr3	37034433	37034933
chr8	109455499	109455999
chr4	48782172	48782672
chr7	132766742	132767242
chr5	102455712	102456212
chr13	50510324	50510824
chr7	75368262	75368762
chr7	30323817	30324317
chr7	100136448	100136948
chr2	24299180	24299680
chr3	156272767	156273267
chr1	236958263	236958763
chr4	128886245	128886745
chr5	61699559	61700059
chr5	32313037	32313537
chr7	124569778	124570278
chr18	77439185	77439685
chr3	114866315	114866815
chr7	77427581	77428081
chr13	60737919	60738419
chr1	70876576	70877076
chr12	122710487	122710987
chr1	231114449	231114949
chr2	58273591	58274091
chr1	68150587	68151087
chr5	82373021	82373521
chr9	4792547	4793047
chr2	37193576	37194076
chr7	32534799	32535299
chr3	38066363	38066863
chr5	33440700	33441200
chr3	119813638	119814138
chr7	112090120	112090620
chr3	133292053	133292553
chr5	159546391	159546891
chr3	50273168	50273668
chr7	152160797	152161297
chr16	9185098	9185598
chr4	83955945	83956445
chr8	104427179	104427679
chr15	81616389	81616889
chr16	72127429	72127929
chr1	159750387	159750887
chr11	108093345	108093845
chr9	74525979	74526479
chr1	31190923	31191423
chr19	50269616	50270116
chr7	23053561	23054061
chr2	215674520	215675020
chrX	20159837	20160337
chr11	82782733	82783233
chr10	3214829	3215329
chr16	72042325	72042825
chr7	77427751	77428251
chr8	41386374	41386874
chr7	7680017	7680517
chr1	89149531	89150031
chr7	21466786	21467286
chr15	89631257	89631757
chr5	74807365	74807865
chr10	38265389	38265889
chr2	240322710	240323210
chr2	208394388	208394888
chr16	78133113	78133613
chr14	74551084	74551584
chr4	166033848	166034348
chr6	52149514	52150014
chr1	193028350	193028850
chr3	195163696	195164196
chr7	138144629	138145129
chr10	97453548	97454048
chr6	146864538	146865038
chr14	21924119	21924619
chr3	136580693	136581193
chr13	25496823	25497323
chr5	145582817	145583317
chr1	54518864	54519364
chr1	172501891	172502391
chr3	197463630	197464130
chr8	9413096	9413596
chr12	56367422	56367922
chr14	62161780	62162280
chr11	14913588	14914088
chr11	30344380	30344880
chr1	220219702	220220202
chr13	73301595	73302095
chr2	84743256	84743756
chr13	20437576	20438076
chr7	38217507	38218007
chr18	9475102	9475602
chr7	87505404	87505904
chr11	6704481	6704981
chr13	111367733	111368233
chr20	25677306	25677806
chr7	45039339	45039839
chr5	143550079	143550579
chr11	122932751	122933251
chr3	190231508	190232008
chr19	19887088	19887588
chr9	77643075	77643575
chr14	54863334	54863834
chr12	14956280	14956780
chr18	29672240	29672740
chr7	66093602	66094102
chr20	13619424	13619924
chr1	244615251	244615751
chr9	96928125	96928625
chr7	86974639	86975139
chr3	88108091	88108591
chr14	81407951	81408451
chr18	71815400	71815900
chr3	125634652	125635152
chr7	111846392	111846892
chr18	65183863	65184363
chr4	68566736	68567236
chr14	23398490	23398990
chr12	31881695	31882195
chr7	76751532	76752032
chrY	10037596	10038096
chr19	19496249	19496749
chr2	62932288	62932788
chr11	134123117	134123617
chr11	59383177	59383677
chr14	73493665	73494165
chr3	100428000	100428500
chr1	67390365	67390865
chr6	144416629	144417129
chr11	3818716	3819216
chr6	155635585	155636085
chrX	16804145	16804645
chr7	120590432	120590932
chr5	68389478	68389978
chr12	117175733	117176233
chr15	45571234	45571734
chr3	57583084	57583584
chr6	89673198	89673698
chr14	23755204	23755704
chr1	100715215	100715715
chr6	90539281	90539781
chr3	38206350	38206850
chr3	182817151	182817651
chr8	28747467	28747967
chr16	46722969	46723469
chr4	170541344	170541844
chr15	77223748	77224248
chr7	21466580	21467080
chr10	92980172	92980672
chrX	14891117	14891617
chr3	121468471	121468971
chr15	101142315	101142815
chr14	97263374	97263874
chr2	179315732	179316232
chr1	236445138	236445638
chr12	49075874	49076374
chr14	76127095	76127595
chr5	44808705	44809205
chr20	39657059	39657559
chr16	53537058	53537558
chr4	17812183	17812683
chr2	74881094	74881594
chr4	47916428	47916928
chr3	155572160	155572660
chr2	33824252	33824752
chr1	114354826	114355326
chr3	16306380	16306880
chr2	135675948	135676448
chr2	88926888	88927388
chr20	17662783	17663283
chr7	44121990	44122490
chr9	130158982	130159482
chr3	131080368	131080868
chr10	85898971	85899471
chr18	60382116	60382616
chr8	86132471	86132971
chr7	149071	149571
chr1	44115440	44115940
chr14	60558414	60558914
chr18	12377129	12377629
chr7	56174009	56174509
chr12	95611178	95611678
chr2	101179074	101179574
chr8	79578048	79578548
chr20	21106399	21106899
chr14	23790119	23790619
chr12	30907615	30908115
chr10	121485186	121485686
chr4	130014536	130015036
chr6	18155320	18155820
chr4	68411057	68411557
chr19	5904270	5904770
chr12	98987181	98987681
chr17	41400760	41401260
chr5	130506278	130506778
chr7	72649373	72649873
chr3	158390251	158390751
chr1	28052069	28052569
chr3	38178499	38178999
chr4	177240751	177241251
chr4	120133535	120134035
chr9	15422505	15423005
chr3	9772791	9773291
chr10	124913493	124913993
chr4	89205642	89206142
chr14	99947313	99947813
chr3	169939942	169940442
chr2	172290383	172290883
chr14	20811208	20811708
chr11	13689838	13690338
chr12	113658854	113659354
chr9	20683950	20684450
chr14	36295252	36295752
chr10	106028595	106029095
chr8	118532619	118533119
chr16	72698696	72699196
chr21	27107074	27107574
chr16	18812736	18813236
chr17	12921164	12921664
chr14	45366099	45366599
chr2	136498977	136499477
chr12	46384309	46384809
chr1	74663644	74664144
chr7	56119087	56119587
chrX	15872756	15873256
chr3	28282757	28283257
chr2	64978205	64978705
chr12	50561037	50561537
chr6	153304102	153304602
chr10	12110568	12111068
chr7	90893486	90893986
chr9	110045075	110045575
chr4	174255438	174255938
chr4	99064445	99064945
chr1	87379933	87380433
chr14	96858023	96858523
chr1	153700117	153700617
chr8	67525451	67525951
chr17	40540357	40540857
chr5	43313543	43314043
chr5	89825266	89825766
chr14	73392801	73393301
chr13	31191609	31192109
chr3	40494542	40495042
chr19	5904390	5904890
chr4	6271204	6271704
chr3	17784066	17784566
chr19	48972187	48972687
chr8	42010071	42010571
chr10	120514402	120514902
chr6	163148609	163149109
chr11	77705716	77706216
chr10	76585954	76586454
chr7	149535176	149535676
chr3	185826770	185827270
chr6	117996306	117996806
chr14	64108491	64108991
chr1	211752395	211752895
chr11	126138658	126139158
chr10	101418857	101419357
chr12	8395558	8396058
chr13	111358392	111358892
chr13	111567381	111567881
chr4	119199539	119200039
chr4	120987818	120988318
chr3	8543150	8543650
chr4	9693199	9693699
chr5	64858781	64859281
chr20	5107257	5107757
chr7	25164834	25165334
chr11	31531013	31531513
chr14	100659159	100659659
chr5	43121364	43121864
chr8	87354459	87354959
chr10	99400144	99400644
chr7	77325408	77325908
chr10	115933826	115934326
chr21	44394161	44394661
chr11	4629248	4629748
chr19	42579906	42580406
chr11	62521482	62521982
chr19	8008472	8008972
chr1	169455020	169455520
chr10	134350765	134351265
chr5	162887258	162887758
chr2	68694301	68694801
chr8	66546278	66546778
chr12	68725984	68726484
chr3	121553745	121554245
chr3	136471239	136471739
chr5	114961629	114962129
chr12	95867590	95868090
chr12	6961416	6961916
chr8	66556646	66557146
chr3	160283206	160283706
chr5	156569674	156570174
chr2	44395422	44395922
chr10	16478657	16479157
chr1	113932704	113933204
chr5	128430062	128430562
chr1	180600814	180601314
chr2	48667579	48668079
chr17	56595209	56595709
chr7	123174920	123175420
chr1	212458300	212458800
chr3	28390377	28390877
chr4	775557	776057
chr2	171785352	171785852
chr14	53196476	53196976
chr4	174291709	174292209
chr21	38639593	38640093
chr4	83821540	83822040
chr4	190861622	190862122
chr11	114309875	114310375
chr18	14132296	14132796
chr1	8021364	8021864
chr16	56485120	56485620
chr5	71604032	71604532
chrX	136520258	136520758
chr7	135194709	135195209
chr12	57472403	57472903
chr3	15642946	15643446
chr14	45431022	45431522
chr2	175351728	175352228
chr1	246729445	246729945
chr7	94287531	94288031
chr13	95253769	95254269
chr4	129208922	129209422
chr1	193090909	193091409
chrX	48660135	48660635
chr19	6424754	6425254
chr6	88299526	88300026
chr8	10697274	10697774
chr1	68962604	68963104
chr8	67340866	67341366
chr2	148778237	148778737
chr14	91526832	91527332
chr11	63953250	63953750
chr11	22851257	22851757
chr8	8085308	8085808
chr4	37687946	37688446
chr1	228353108	228353608
chr13	25875440	25875940
chr12	99038669	99039169
chr13	73355946	73356446
chr1	52831794	52832294
chr10	38146386	38146886
chr10	43048104	43048604
chr11	85780031	85780531
chr10	94050627	94051127
chr13	52158057	52158557
chr11	44586661	44587161
chr5	56469504	56470004
chr7	106809067	106809567
chr7	30544340	30544840
chr5	148737232	148737732
chr2	187454449	187454949
chr19	11485464	11485964
chr6	80246939	80247439
chr4	83933945	83934445
chr11	94226845	94227345
chr2	20251272	20251772
chr2	3605797	3606297
chr17	46969692	46970192
chr7	72298588	72299088
chr11	32605021	32605521
chr2	198364469	198364969
chr7	12250613	12251113
chr17	26662376	26662876
chr18	59854112	59854612
chr17	4870475	4870975
chr11	73881913	73882413
chr2	203879122	203879622
chr3	135969216	135969716
chr3	31573775	31574275
chr3	114865965	114866465
chr14	21944997	21945497
chrX	3732842	3733342
chr17	57184098	57184598
chr2	232378887	232379387
chr2	62932478	62932978
chr2	74685201	74685701
chr14	45603529	45604029
chr2	32390572	32391072
chr1	45139974	45140474
chr1	225965190	225965690
chr7	108209983	108210483
chr15	77712421	77712921
chr14	105219080	105219580
chr2	70141805	70142305
chr10	105991923	105992423
chr2	133029428	133029928
chr5	64919941	64920441
chr4	10118250	10118750
chr1	119683091	119683591
chr4	122791470	122791970
chr7	100183787	100184287
chr1	111506397	111506897
chr9	130533517	130534017
chr4	1340628	1341128
chr4	48832797	48833297
chr4	113152590	113153090
chr7	128864420	128864920
chr2	118571873	118572373
chr4	184580146	184580646
chr11	9482115	9482615
chr8	12051622	12052122
chr11	16759830	16760330
chr8	62627045	62627545
chr16	14013647	14014147
chr15	89089668	89090168
chr12	82752051	82752551
chr12	56753839	56754339
chr16	67840349	67840849
chr9	106856051	106856551
chr5	108745555	108746055
chr16	75498471	75498971
chr1	6673401	6673901
chr1	166845364	166845864
chr2	136288675	136289175
chr6	5003699	5004199
chr4	83295071	83295571
chr19	4471668	4472168
chr2	26256567	26257067
chr13	45915348	45915848
chr3	130745436	130745936
chr6	117923503	117924003
chr20	3869649	3870149
chr16	75018846	75019346
chr11	18655781	18656281
chr5	87564521	87565021
chr1	47779699	47780199
chr9	108006526	108007026
chr12	50134956	50135456
chr20	60813153	60813653
chr9	2014928	2015428
chr18	51750836	51751336
chr10	13203210	13203710
chr4	103749075	103749575
chr1	162530988	162531488
chr4	48343039	48343539
chr17	26368427	26368927
chr5	122847476	122847976
chr13	76123319	76123819
chr18	54305717	54306217
chr2	190648886	190649386
chr14	74959913	74960413
chr14	91527045	91527545
chr8	124084593	124085093
chr7	8008050	8008550
chr10	977525	978025
chr16	74700637	74701137
chr13	41706732	41707232
chr22	41682124	41682624
chr12	64797850	64798350
chr20	20693311	20693811
chr14	105218852	105219352
chr12	82752341	82752841
chr14	39644056	39644556
chr4	17578751	17579251
chr3	155588029	155588529
chr17	41400432	41400932
chr12	133656502	133657002
chr4	113557964	113558464
chr13	73632761	73633261
chr4	2537881	2538381
chr1	233462978	233463478
chr5	31532065	31532565
chr14	74960060	74960560
chr12	56497965	56498465
chr3	180629918	180630418
chr5	70882841	70883341
chr9	127905673	127906173
chr4	467778	468278
chr17	40306882	40307382
chr1	197170322	197170822
chr8	12990643	12991143
chr17	79196663	79197163
chr15	40857073	40857573
chr19	14640033	14640533
chr5	81046801	81047301
chr15	35261787	35262287
chr6	79944205	79944705
chr11	77899522	77900022
chr6	111136466	111136966
chr14	71276198	71276698
chr8	120885695	120886195
chr12	56521639	56522139
chr19	16222234	16222734
chr17	47866336	47866836
chr17	45973235	45973735
chr8	95565541	95566041
chr19	52692772	52693272
chr4	152681981	152682481
chr7	44646205	44646705
chr1	167189670	167190170
chr17	47841470	47841970
chr7	35840415	35840915
chr5	142149629	142150129
chr19	28284628	28285128
chr3	105085323	105085823
chr12	49463567	49464067
chr5	178986377	178986877
chr6	30034521	30035021
chr8	681041	681541
chr13	34116629	34117129
chr22	29999225	29999725
chr3	42632035	42632535
chr2	114647282	114647782
chr1	55230084	55230584
chr12	120105422	120105922
chr7	65337859	65338359
chr7	27702428	27702928
chr6	108279258	108279758
chr7	64126162	64126662
chr10	32049012	32049512
chr6	70506775	70507275
chr3	19988304	19988804
chr7	76009126	76009626
chr9	77703059	77703559
chr12	44152418	44152918
chr2	70141619	70142119
chr3	42845784	42846284
chr4	18023492	18023992
chr7	99746163	99746663
chr7	74508630	74509130
chr21	34914991	34915491
chr8	93977621	93978121
chr5	85913434	85913934
chr7	142985112	142985612
chr2	11295084	11295584
chr9	5437663	5438163
chr2	178077063	178077563
chr8	29940407	29940907
chr7	158497434	158497934
chr5	137878790	137879290
chr4	147866830	147867330
chr1	247373971	247374471
chr9	139685188	139685688
chr6	38670725	38671225
chr5	94982263	94982763
chr11	28129571	28130071
chr7	97501584	97502084
chr20	5100454	5100954
chr10	70883571	70884071
chr19	40476680	40477180
chr7	33168879	33169379
chr1	183604717	183605217
chr13	44715939	44716439
chr7	64023302	64023802
chr2	42067795	42068295
chr15	90931046	90931546
chr17	17875632	17876132
chr17	30228583	30229083
chr1	93645827	93646327
chr12	56211409	56211909
chr7	87849127	87849627
chr18	12947668	12948168
chr5	108063807	108064307
chr7	140714569	140715069
chr19	47551730	47552230
chr2	145089955	145090455
chr14	88237397	88237897
chr13	52027058	52027558
chr19	45393992	45394492
chr7	108166507	108167007
chr2	122494355	122494855
chr14	96000972	96001472
chr11	57424887	57425387
chr5	98108982	98109482
chr3	180707349	180707849
chr6	37225223	37225723
chr2	201390559	201391059
chr11	124823723	124824223
chr1	33502331	33502831
chr8	74790931	74791431
chr7	39989037	39989537
chr7	144532894	144533394
chr4	152020371	152020871
chr2	46925898	46926398
chr19	8454887	8455387
chr17	19281393	19281893
chr6	146285324	146285824
chr17	58754894	58755394
chr4	78077662	78078162
chr1	67895922	67896422
chr1	62902044	62902544
chr19	14247350	14247850
chr9	131843026	131843526
chr3	20227540	20228040
chr6	10723011	10723511
chr2	55277498	55277998
chr2	187350658	187351158
chr6	71122849	71123349
chr16	30381873	30382373
chr19	19174378	19174878
chr13	46626675	46627175
chr2	192542474	192542974
chr16	30759355	30759855
chr1	163291393	163291893
chr1	46598469	46598969
chr3	9690801	9691301
chr2	133025572	133026072
chr12	34175096	34175596
chr4	169931271	169931771
chr8	124286750	124287250
chr17	57232699	57233199
chr2	175113154	175113654
chr19	48018317	48018817
chr17	39942894	39943394
chr6	135375747	135376247
chr10	131908879	131909379
chr2	191184431	191184931
chr14	51706617	51707117
chr16	3450870	3451370
chr14	77564169	77564669
chr5	68462615	68463115
chr1	181998595	181999095
chr18	30050605	30051105
chr2	25264699	25265199
chr15	85923445	85923945
chr8	99838056	99838556
chr17	14204029	14204529
chr19	3572531	3573031
chr6	2765302	2765802
chr15	59063137	59063637
chr6	72130381	72130881
chr10	103578150	103578650
chr18	71959088	71959588
chr4	128982149	128982649
chr1	59012238	59012738
chr10	14879940	14880440
chr2	64371430	64371930
chr10	99258246	99258746
chr3	120314863	120315363
chr4	108910665	108911165
chr7	134001565	134002065
chr2	131100115	131100615
chr2	55920756	55921256
chr18	60189995	60190495
chr14	21737644	21738144
chr2	227700473	227700973
chr20	23338684	23339184
chr11	96122836	96123336
chr7	105925292	105925792
chr11	130786199	130786699
chr13	31736298	31736798
chr21	37528500	37529000
chr16	15982353	15982853
chr5	173314948	173315448
chr9	103173825	103174325
chr1	32859909	32860409
chr2	32288430	32288930
chr17	43394410	43394910
chr2	198380411	198380911
chr13	52586148	52586648
chr11	47788843	47789343
chr1	10092609	10093109
chr11	77531697	77532197
chr7	134896143	134896643
chr20	40246919	40247419
chr5	89705581	89706081
chr7	44621691	44622191
chr3	167813554	167814054
chr2	27008545	27009045
chr2	65283169	65283669
chr18	61034631	61035131
chrX	13670958	13671458
chr1	117602564	117603064
chr7	12726087	12726587
chr7	150754882	150755382
chr8	11659857	11660357
chr11	74204044	74204544
chr18	18691690	18692190
chr3	42003415	42003915
chr4	185655141	185655641
chr2	120124275	120124775
chr8	87520721	87521221
chr3	140660384	140660884
chr6	112408518	112409018
chr12	53773401	53773901
chr15	59041904	59042404
chr5	179125574	179126074
chr14	23564209	23564709
chr3	51975864	51976364
chr9	130007285	130007785
chr2	91847775	91848275
chr19	37861701	37862201
chr3	150264137	150264637
chr11	66725735	66726235
chr2	232329040	232329540
chr3	142297454	142297954
chr16	28961873	28962373
chr1	7843831	7844331
chr4	76649443	76649943
chr2	24270113	24270613
chr6	119214972	119215472
chr11	108464242	108464742
chr14	35515245	35515745
chr18	66382137	66382637
chr8	57123995	57124495
chr13	101327001	101327501
chr2	44395637	44396137
chr12	4430022	4430522
chr12	21654368	21654868
chr11	94706535	94707035
chr4	8160421	8160921
chr9	26956129	26956629
chr16	4303791	4304291
chr5	7868990	7869490
chr19	18314755	18315255
chr20	45318012	45318512
chr11	82997203	82997703
chr19	44172731	44173231
chr1	235667656	235668156
chr20	13975666	13976166
chr1	109968925	109969425
chr12	25403713	25404213
chr1	151762826	151763326
chr20	34204117	34204617
chr11	57435118	57435618
chr8	126010378	126010878
chr10	121356452	121356952
chr6	155635441	155635941
chr12	83080349	83080849
chr8	93978135	93978635
chr17	61699254	61699754
chr13	37633645	37634145
chr2	55844586	55845086
chr5	126366079	126366579
chr18	61089536	61090036
chr19	33165940	33166440
chr20	13975839	13976339
chr2	216176450	216176950
chr14	21979348	21979848
chr1	235491430	235491930
chr17	73285348	73285848
chr18	34408801	34409301
chr7	107531320	107531820
chr7	102003967	102004467
chr17	79818542	79819042
chr4	99916325	99916825
chr14	77923791	77924291
chr19	14228454	14228954
chr1	144932222	144932722
chr15	91260240	91260740
chr1	6052332	6052832
chr1	24969327	24969827
chr12	104323780	104324280
chr2	122512822	122513322
chr5	8457412	8457912
chr6	32163273	32163773
chr14	104181700	104182200
chr14	31495494	31495994
chr2	133104751	133105251
chr19	9945620	9946120
chr7	63767525	63768025
chr1	209920992	209921492
chr3	129158706	129159206
chr16	46865196	46865696
chr10	101190378	101190878
chr3	27525821	27526321
chr13	20207455	20207955
chr1	43232602	43233102
chr16	75551105	75551605
chr12	114403977	114404477
chr2	73460238	73460738
chr20	17949367	17949867
chr9	34989321	34989821
chr4	47487049	47487549
chr1	3773667	3774167
chr5	56205527	56206027
chr11	125932616	125933116
chr22	42486670	42487170
chr6	143771623	143772123
chr11	108337988	108338488
chr18	19320376	19320876
chr10	104677670	104678170
chr5	112312126	112312626
chr9	2843928	2844428
chr7	1499052	1499552
chr2	166810112	166810612
chr1	6845130	6845630
chr19	16606836	16607336
chr19	36422306	36422806
chr17	11900608	11901108
chr2	96931621	96932121
chr7	44163000	44163500
chr9	91925607	91926107
chr11	31391081	31391581
chr1	40506014	40506514
chr3	101443498	101443998
chr18	12991000	12991500
chr3	129830170	129830670
chr5	41925083	41925583
chr13	103248985	103249485
chr3	127842490	127842990
chr2	48133572	48134072
chr7	77166001	77166501
chr12	32831908	32832408
chr16	54962977	54963477
chr4	57301568	57302068
chr15	93425516	93426016
chr19	47852200	47852700
chr16	89556930	89557430
chr10	124133844	124134344
chr4	102268585	102269085
chr4	39528978	39529478
chr5	139780970	139781470
chr16	77756097	77756597
chr2	32852866	32853366
chr12	50505485	50505985
chr3	186288083	186288583
chr16	22201738	22202238
chr13	77565951	77566451
chr17	27139313	27139813
chr2	61991268	61991768
chr1	171282961	171283461
chr9	100395552	100396052
chr21	43916254	43916754
chr19	55850606	55851106
chr18	32820691	32821191
chr12	54674146	54674646
chr11	66383731	66384231
chr11	65819417	65819917
chr3	61236942	61237442
chr1	197115623	197116123
chr6	75953347	75953847
chr14	58764716	58765216
chr8	117778422	117778922
chr9	80911711	80912211
chr2	26101239	26101739
chr5	110848126	110848626
chr1	100598343	100598843
chr11	10830318	10830818
chr4	148538252	148538752
chr10	74033375	74033875
chr5	149339994	149340494
chr8	8085561	8086061
chr9	15307061	15307561
chr6	20212535	20213035
chr3	49823823	49824323
chr4	149363515	149364015
chr11	82996852	82997352
chr3	14989752	14990252
chr2	210867005	210867505
chr6	46620383	46620883
chr3	179322292	179322792
chr7	128379075	128379575
chr12	102224535	102225035
chr5	118604136	118604636
chr3	4534706	4535206
chr6	167412497	167412997
chr13	20532522	20533022
chr7	149321596	149322096
chr12	22777788	22778288
chr20	32580818	32581318
chr6	111580151	111580651
chr15	100882079	100882579
chr12	31811951	31812451
chr7	123174449	123174949
chr22	46431542	46432042
chr2	217276869	217277369
chr15	72564835	72565335
chr4	20701750	20702250
chr11	36615755	36616255
chr2	242295273	242295773
chr13	107187865	107188365
chr3	132441098	132441598
chr1	213188926	213189426
chr9	33264598	33265098
chr5	55290663	55291163
chr19	54641034	54641534
chr10	45454837	45455337
chr12	10364791	10365291
chr1	150601903	150602403
chr6	166796317	166796817
chr10	43133465	43133965
chr4	120221619	120222119
chr12	75905264	75905764
chr21	34852022	34852522
chr2	159313047	159313547
chr3	14692875	14693375
chr14	73925138	73925638
chr11	73490368	73490868
chr18	77793913	77794413
chr12	56367210	56367710
chr3	179065184	179065684
chr9	139685446	139685946
chr6	96969418	96969918
chr10	131909222	131909722
chr10	60028583	60029083
chr4	185570484	185570984
chr19	54640729	54641229
chr15	33486774	33487274
chr7	12726851	12727351
chr19	15529667	15530167
chr1	114447561	114448061
chr9	88356760	88357260
chr7	108166450	108166950
chr1	36689706	36690206
chr10	97320962	97321462
chr18	67873017	67873517
chr5	89705375	89705875
chr10	22292435	22292935
chr2	178976878	178977378
chr6	160183175	160183675
chr1	60280060	60280560
chr2	219134870	219135370
chr3	66271088	66271588
chr5	131132571	131133071
chr4	3957332	3957832
chr6	101329012	101329512
chr2	122406941	122407441
chr10	38299698	38300198
chr17	45726760	45727260
chr3	122102748	122103248
chr4	146540296	146540796
chr14	64009941	64010441
chr1	46152560	46153060
chr1	247241883	247242383
chr5	109024792	109025292
chr7	64254489	64254989
chr11	113644249	113644749
chr1	174128353	174128853
chr9	33473745	33474245
chr9	68726186	68726686
chr3	52570307	52570807
chr5	61601636	61602136
chr7	65215716	65216216
chr16	71323146	71323646
chr8	103424855	103425355
chr10	71930119	71930619
chr5	162932328	162932828
chr15	100273479	100273979
chr12	56693998	56694498
chr10	129845536	129846036
chr13	33112746	33113246
chr11	17297894	17298394
chr11	73309021	73309521
chr12	49716613	49717113
chr1	202317483	202317983
chrX	15353520	15354020
chr1	118472084	118472584
chr14	35008689	35009189
chr2	220094183	220094683
chr4	122744921	122745421
chr16	46917896	46918396
chr1	25071453	25071953
chr7	86781472	86781972
chr11	86748672	86749172
chr1	76251596	76252096
chr3	141456722	141457222
chr9	134000615	134001115
chr1	156736859	156737359
chr3	101394923	101395423
chrX	107334663	107335163
chr6	133135240	133135740
chr4	103940550	103941050
chr2	128784755	128785255
chr2	208030712	208031212
chr19	8943272	8943772
chr11	64684607	64685107
chr18	9136364	9136864
chr19	8590468	8590968
chr15	23034295	23034795
chr2	190525773	190526273
chr17	20946462	20946962
chr19	9929913	9930413
chr1	38397316	38397816
chr11	57092290	57092790
chr3	105587694	105588194
chr1	11322503	11323003
chr11	57479638	57480138
chr1	16543785	16544285
chr2	160143035	160143535
chr11	34460154	34460654
chr9	115983437	115983937
chr6	64282118	64282618
chr10	46167975	46168475
chr19	4402189	4402689
chr6	10747655	10748155
chr9	116163486	116163986
chr3	40350901	40351401
chr11	115374956	115375456
chr19	33462825	33463325
chr3	9438473	9438973
chr4	99182147	99182647
chr3	39447805	39448305
chr10	1095056	1095556
chr1	6844968	6845468
chr17	53828094	53828594
chr4	13485775	13486275
chr5	81267562	81268062
chr20	23401928	23402428
chr15	40074516	40075016
chr11	64546055	64546555
chr21	30365041	30365541
chr15	41624618	41625118
chr3	14166180	14166680
chr11	125439014	125439514
chr2	64067785	64068285
chr12	66695880	66696380
chr18	43547138	43547638
chr1	70686807	70687307
chr7	16685185	16685685
chr12	53399824	53400324
chr6	86388308	86388808
chr14	77589791	77590291
chr8	124428543	124429043
chr17	79980740	79981240
chr4	146101537	146102037
chr1	201139748	201140248
chr14	65006980	65007480
chr11	19138383	19138883
chr17	40761289	40761789
chr2	176866766	176867266
chr9	88969161	88969661
chr16	25042767	25043267
chr19	48867196	48867696
chr2	152684820	152685320
chr17	21117298	21117798
chr17	47492090	47492590
chr2	225450126	225450626
chr7	26904123	26904623
chr20	25371408	25371908
chr5	145826452	145826952
chr11	76155563	76156063
chr13	22177760	22178260
chr8	90914478	90914978
chr14	23388355	23388855
chr10	38299253	38299753
chr12	110011239	110011739
chr12	122985312	122985812
chr10	105677789	105678289
chr15	36871561	36872061
chr20	18488240	18488740
chr6	11232668	11233168
chr19	20162849	20163349
chr3	123303743	123304243
chr9	133587880	133588380
chr13	48611900	48612400
chr10	95256016	95256516
chr19	8477837	8478337
chr9	123476646	123477146
chr19	14062895	14063395
chr1	222817324	222817824
chr6	142468064	142468564
chr19	36545054	36545554
chr2	178937314	178937814
chr8	82633365	82633865
chr14	50778751	50779251
chr7	140179033	140179533
chr15	42867408	42867908
chr15	44719067	44719567
chr15	80215923	80216423
chr6	86352918	86353418
chr10	101380100	101380600
chr12	4647698	4648198
chr5	60704442	60704942
chr5	176074093	176074593
chr15	34393952	34394452
chr9	36190578	36191078
chrX	77359350	77359850
chr1	150669516	150670016
chr8	94766841	94767341
chr7	64466883	64467383
chr20	58515196	58515696
chr19	9929759	9930259
chr3	152878910	152879410
chr11	82611302	82611802
chr4	89513274	89513774
chr6	84569075	84569575
chr10	31321116	31321616
chr5	111496210	111496710
chr7	135661938	135662438
chr5	55007986	55008486
chr1	202310937	202311437
chr9	15552707	15553207
chr19	4968576	4969076
chr12	53845500	53846000
chr7	123197683	123198183
chr14	67707702	67708202
chr14	24583617	24584117
chr14	32545812	32546312
chr4	100871405	100871905
chr10	105881498	105881998
chr15	44829033	44829533
chr19	16770797	16771297
chr14	100070480	100070980
chr5	87437110	87437610
chr8	30891032	30891532
chr19	19030134	19030634
chr7	23145120	23145620
chr16	19566614	19567114
chr3	37901800	37902300
chr2	136288218	136288718
chr5	40835170	40835670
chr1	36614980	36615480
chr5	170814437	170814937
chr4	159131401	159131901
chr5	57878589	57879089
chr3	156392031	156392531
chr16	57769268	57769768
chr4	109541348	109541848
chr7	121784141	121784641
chr5	175874901	175875401
chr1	23694620	23695120
chr22	21271322	21271822
chr11	108535422	108535922
chr19	23433014	23433514
chr9	35604007	35604507
chr17	7518239	7518739
chr14	93260239	93260739
chr19	52097498	52097998
chr19	36605997	36606497
chr7	14030823	14031323
chr9	123605072	123605572
chr6	97345566	97346066
chr11	73472056	73472556
chr9	34329106	34329606
chr3	97540559	97541059
chr3	9791374	9791874
chr2	211341240	211341740
chr1	147071577	147072077
chr2	209130628	209131128
chr2	223725432	223725932
chr5	132201941	132202441
chr1	39325256	39325756
chr11	65686514	65687014
chr3	25706219	25706719
chr6	24402834	24403334
chr3	160167357	160167857
chr10	62537848	62538348
chr17	75954344	75954844
chr1	31769542	31770042
chr16	2273225	2273725
chr5	95297408	95297908
chr10	50746879	50747379
chr3	160473095	160473595
chr5	118406508	118407008
chr2	9771019	9771519
chr7	2883853	2884353
chr6	74230696	74231196
chr2	63815727	63816227
chr1	227975605	227976105
chr1	38157770	38158270
chr5	172483971	172484471
chr7	33102231	33102731
chr7	64498271	64498771
chr19	11545883	11546383
chr3	185303629	185304129
chr3	32147740	32148240
chr19	50528515	50529015
chr11	18417417	18417917
chr10	101380256	101380756
chr3	23958293	23958793
chr3	42641741	42642241
chr19	10981589	10982089
chr19	6110444	6110944
chr12	108908675	108909175
chr20	32398805	32399305
chr5	71615875	71616375
chr17	26645817	26646317
chr11	43380179	43380679
chr10	70480607	70481107
chr5	157158493	157158993
chr16	30669346	30669846
chr8	30890920	30891420
chr15	64455173	64455673
chr4	124040	124540
chr8	56986925	56987425
chr12	57039630	57040130
chr9	79792145	79792645
chr1	160990860	160991360
chr17	47755229	47755729
chr6	131949171	131949671
chr15	89877887	89878387
chr3	51422301	51422801
chr10	91011529	91012029
chr18	56806737	56807237
chr4	184425497	184425997
chr1	54411335	54411835
chr9	117349612	117350112
chr12	53472992	53473492
chr7	75988394	75988894
chr19	47164306	47164806
chr11	118991892	118992392
chr6	11093719	11094219
chr3	3221164	3221664
chr22	41985798	41986298
chr11	8008485	8008985
chr12	74931345	74931845
chr2	67624160	67624660
chr4	69215566	69216066
chr11	59436458	59436958
chr15	49447621	49448121
chr12	54673300	54673800
chr11	102962687	102963187
chr6	99963113	99963613
chr18	158212	158712
chr12	27091081	27091581
chr15	44084133	44084633
chr5	79783705	79784205
chr6	74363561	74364061
chr8	67687163	67687663
chr11	118927807	118928307
chr1	214776238	214776738
chr7	66461507	66462007
chr19	36505021	36505521
chr14	31926444	31926944
chr11	4414723	4415223
chr17	46125302	46125802
chr8	134309356	134309856
chr6	86303425	86303925
chr9	84304489	84304989
chr3	107941105	107941605
chr9	123964039	123964539
chr20	44440900	44441400
chr5	112042910	112043410
chr2	120517049	120517549
chr5	89770389	89770889
chr2	170550748	170551248
chr15	49462089	49462589
chr2	99757516	99758016
chr6	97372278	97372778
chr4	71553747	71554247
chr21	35013917	35014417
chr7	89840792	89841292
chr7	43622246	43622746
chr12	125533988	125534488
chr1	153895289	153895789
chr12	118810592	118811092
chr8	102217775	102218275
chr8	57906253	57906753
chr15	81281964	81282464
chr5	153825190	153825690
chr18	19284560	19285060
chr3	128399391	128399891
chr1	45956733	45957233
chr12	107167766	107168266
chr16	28935915	28936415
chr9	86536173	86536673
chr2	26568578	26569078
chr9	35732251	35732751
chr3	45730477	45730977
chr6	80579257	80579757
chr4	140003953	140004453
chr4	141294444	141294944
chr19	54663387	54663887
chr5	77590342	77590842
chr16	2932523	2933023
chr11	95522746	95523246
chrX	151999146	151999646
chr13	48575257	48575757
chr8	27631675	27632175
chr1	23670702	23671202
chr9	4984552	4985052
chr7	97881321	97881821
chr11	122933050	122933550
chr12	54718548	54719048
chr19	18632872	18633372
chr3	197281500	197282000
chr7	96746651	96747151
chr20	39946148	39946648
chr3	130612614	130613114
chr9	91925556	91926056
chr5	147763198	147763698
chr6	170893543	170894043
chr12	65563034	65563534
chr6	52859901	52860401
chr6	24721301	24721801
chr7	100895454	100895954
chr13	60970282	60970782
chr5	153418202	153418702
chr4	76598429	76598929
chr12	80328754	80329254
chr6	52535633	52536133
chr6	107349170	107349670
chr1	147071423	147071923
chr11	94822720	94823220
chr5	118324062	118324562
chr5	178157507	178158007
chr1	10458722	10459222
chr8	61429166	61429666
chr5	177580743	177581243
chr12	123011391	123011891
chr8	48873166	48873666
chr19	39390162	39390662
chr14	90420948	90421448
chr4	155471363	155471863
chr14	79745367	79745867
chr4	153700773	153701273
chr19	7069121	7069621
chr2	44394949	44395449
chr1	154955468	154955968
chr11	13298869	13299369
chr5	61708251	61708751
chr20	32077481	32077981
chr13	29292925	29293425
chr3	133524351	133524851
chr10	25013420	25013920
chr14	53258059	53258559
chr13	27131469	27131969
chr14	54976250	54976750
chr3	98312316	98312816
chr5	141348433	141348933
chr5	76325924	76326424
chr12	92539689	92540189
chrX	119763812	119764312
chr11	22647180	22647680
chr3	120136031	120136531
chr7	107383933	107384433
chr19	17580856	17581356
chr7	43908924	43909424
chr5	154134422	154134922
chr1	207925087	207925587
chr12	105501259	105501759
chr3	111393177	111393677
chr11	19734080	19734580
chr5	137089894	137090394
chr2	74756759	74757259
chr2	98280385	98280885
chr6	42981546	42982046
chr9	34458378	34458878
chr2	61765608	61766108
chr1	155278254	155278754
chr7	105172349	105172849
chr2	64751155	64751655
chrX	106871349	106871849
chr3	12705446	12705946
chr17	73851371	73851871
chr12	67662789	67663289
chr16	69344900	69345400
chr1	155197167	155197667
chr15	91537675	91538175
chr2	18741758	18742258
chr15	55700328	55700828
chr19	39340887	39341387
chr14	89259007	89259507
chrX	80065233	80065733
chr3	100211080	100211580
chr6	89790134	89790634
chr3	160473037	160473537
chr9	6681085	6681585
chr9	95527019	95527519
chr1	113615491	113615991
chr10	38382964	38383464
chr7	19748479	19748979
chr4	9154544	9155044
chr17	38136630	38137130
chr4	56719508	56720008
chr22	36783927	36784427
chr10	5931781	5932281
chr13	95248246	95248746
chr1	45965584	45966084
chr3	53925687	53926187
chr6	90062322	90062822
chr19	17186131	17186631
chr5	150137994	150138494
chr1	98386375	98386875
chr6	105307583	105308083
chr11	111797437	111797937
chr14	102414297	102414797
chr2	219575326	219575826
chr14	58764922	58765422
chr12	108154757	108155257
chr3	129830433	129830933
chr15	43802839	43803339
chr1	169763888	169764388
chr12	49245786	49246286
chr3	15247417	15247917
chr13	28194551	28195051
chr2	42588435	42588935
chr1	150601483	150601983
chr4	120375720	120376220
chr4	53588337	53588837
chr6	119256063	119256563
chr6	112194492	112194992
chr15	99791266	99791766
chr14	77787468	77787968
chr4	7069670	7070170
chr9	37465569	37466069
chr19	45681387	45681887
chr4	11430460	11430960
chr12	66695999	66696499
chr10	103113547	103114047
chr1	169862868	169863368
chr3	112280971	112281471
chr7	35076920	35077420
chr17	54911117	54911617
chr14	73360688	73361188
chr7	132937481	132937981
chr18	54318222	54318722
chr3	156892688	156893188
chr19	46366253	46366753
chr19	55850877	55851377
chr8	97247602	97248102
chr1	78470286	78470786
chr6	53412668	53413168
chr3	48130213	48130713
chr12	51441742	51442242
chr13	103425936	103426436
chr3	136471068	136471568
chr8	146052552	146053052
chr2	238969316	238969816
chr9	91933478	91933978
chr1	145039691	145040191
chr17	7835140	7835640
chr13	26795773	26796273
chr1	110881697	110882197
chr15	31618543	31619043
chr7	123174588	123175088
chr22	38240178	38240678
chr19	37808424	37808924
chr5	148205779	148206279
chr19	7894668	7895168
chr4	128801756	128802256
chr1	169336849	169337349
chr4	144434269	144434769
chr7	7221877	7222377
chr15	93447286	93447786
chr12	88429039	88429539
chr7	89975697	89976197
chr11	65382695	65383195
chr12	53835149	53835649
chr9	139780587	139781087
chr5	179159444	179159944
chr1	247095029	247095529
chr17	7475666	7476166
chr1	247267466	247267966
chr10	23727720	23728220
chr8	30515570	30516070
chr1	11865849	11866349
chr6	99395744	99396244
chr14	74551285	74551785
chr3	50336729	50337229
chr1	179923566	179924066
chr13	38923426	38923926
chr15	65903338	65903838
chr3	148804122	148804622
chr19	15490447	15490947
chr19	4791334	4791834
chr12	96429225	96429725
chr1	201924314	201924814
chr2	86668204	86668704
chr5	173043538	173044038
chr10	75757540	75758040
chr10	17243188	17243688
chr6	107780571	107781071
chr1	45769115	45769615
chr19	46498289	46498789
chr2	68479594	68480094
chr1	244624462	244624962
chr17	80416232	80416732
chr1	153930919	153931419
chr2	25194624	25195124
chr7	151216945	151217445
chr18	61637543	61638043
chr7	93633471	93633971
chr16	1832545	1833045
chr19	21579607	21580107
chr12	58087509	58088009
chr11	74659958	74660458
chr8	99129194	99129694
chr4	73935347	73935847
chr11	64008649	64009149
chr9	125702932	125703432
chr1	2517739	2518239
chr11	694988	695488
chr2	128785539	128786039
chr12	72148330	72148830
chr17	8338961	8339461
chr11	66405721	66406221
chr19	5680402	5680902
chr17	20058993	20059493
chr3	97483094	97483594
chr5	43515036	43515536
chr3	138312962	138313462
chrX	134232647	134233147
chr12	8395953	8396453
chr14	24616312	24616812
chr1	41826543	41827043
chr12	42538404	42538904
chr2	136633834	136634334
chr14	96968448	96968948
chr20	55043340	55043840
chr3	50396811	50397311
chr1	17380388	17380888
chr19	18747376	18747876
chr11	74459598	74460098
chr4	160023950	160024450
chr1	249132138	249132638
chr16	29984788	29985288
chr9	115141975	115142475
chr6	33385767	33386267
chr17	41400102	41400602
chr1	26324466	26324966
chr4	140374668	140375168
chr6	110501085	110501585
chr8	52811531	52812031
chr1	213031285	213031785
chr4	140222261	140222761
chr21	35287925	35288425
chr8	125486779	125487279
chr18	9102390	9102890
chr5	107717882	107718382
chr22	21212911	21213411
chr9	88555592	88556092
chr18	33552208	33552708
chr11	36768564	36769064
chr3	15643193	15643693
chr1	242010976	242011476
chr20	10015414	10015914
chr5	114505434	114505934
chr21	35014349	35014849
chr12	77157537	77158037
chr22	24256009	24256509
chr2	179344848	179345348
chr4	56261789	56262289
chr19	45505057	45505557
chr16	84538139	84538639
chr5	693307	693807
chr11	71791561	71792061
chr2	203499350	203499850
chr3	49977197	49977697
chr2	113522059	113522559
chr3	141868134	141868634
chr22	37172215	37172715
chr19	17970334	17970834
chr8	101734241	101734741
chr8	135844523	135845023
chr4	25378511	25379011
chr11	114270969	114271469
chr8	71314159	71314659
chr6	49430734	49431234
chr6	88032031	88032531
chr6	42531426	42531926
chr4	95372738	95373238
chr2	238875238	238875738
chr6	53224028	53224528
chr2	46843969	46844469
chr4	128553811	128554311
chr2	27593092	27593592
chr12	54019625	54020125
chr11	57298147	57298647
chr12	2921527	2922027
chr8	17779968	17780468
chr3	141030422	141030922
chr1	241803451	241803951
chr3	127770878	127771378
chr5	94890615	94891115
chr10	64892756	64893256
chr11	67007135	67007635
chr20	56963956	56964456
chr8	8860083	8860583
chr2	98262171	98262671
chr1	154192914	154193414
chr22	41032578	41033078
chr1	171454331	171454831
chr3	125314249	125314749
chr9	95858079	95858579
chr9	140095105	140095605
chr2	198668998	198669498
chr8	133787270	133787770
chr5	176853145	176853645
chr4	186317466	186317966
chr1	59249673	59250173
chr7	36406638	36407138
chr8	38592093	38592593
chr21	26979600	26980100
chr16	3053777	3054277
chr1	17240217	17240717
chr11	117198265	117198765
chr12	120755224	120755724
chr20	54967221	54967721
chr20	18447479	18447979
chr4	44680174	44680674
chr6	33216918	33217418
chr3	13936765	13937265
chr12	62653862	62654362
chr17	46048091	46048591
chr17	4634765	4635265
chr19	54605842	54606342
chr12	121790060	121790560
chr1	185286296	185286796
chr5	96271372	96271872
chr9	5628718	5629218
chr7	82791958	82792458
chr1	26560278	26560778
chr4	3957015	3957515
chr3	140950300	140950800
chr7	23338650	23339150
chr11	18034413	18034913
chr18	48405165	48405665
chr16	11836533	11837033
chr22	17565498	17565998
chr14	100150147	100150647
chr3	101292673	101293173
chr1	87170235	87170735
chr11	62608897	62609397
chr6	144164153	144164653
chr5	157170398	157170898
chr11	129939442	129939942
chr6	33359238	33359738
chr10	99446827	99447327
chr6	160210564	160211064
chr2	60983076	60983576
chr2	219432932	219433432
chr1	86173904	86174404
chr16	46723270	46723770
chr3	193310721	193311221
chr10	18948008	18948508
chr1	93250496	93250996
chr3	119182342	119182842
chr16	11891016	11891516
chr15	41099499	41099999
chr4	48271696	48272196
chr11	6502391	6502891
chr5	162864227	162864727
chr11	113184981	113185481
chrX	55743806	55744306
chr2	99952677	99953177
chr18	23670642	23671142
chr6	41039953	41040453
chr8	37619809	37620309
chr17	57232381	57232881
chr19	49956528	49957028
chr3	101443197	101443697
chr6	117001972	117002472
chr5	52405367	52405867
chr1	207494606	207495106
chr15	25683965	25684465
chr19	19774377	19774877
chr16	15149799	15150299
chr6	110012166	110012666
chr1	33592736	33593236
chr13	33160277	33160777
chr6	33422033	33422533
chr10	75936200	75936700
chr6	46097445	46097945
chr7	66767267	66767767
chr8	55014325	55014825
chr21	40555217	40555717
chr7	64838463	64838963
chr1	28099355	28099855
chr22	41487337	41487837
chr14	50087176	50087676
chr17	79212709	79213209
chr14	57856976	57857476
chr17	6917795	6918295
chr17	43128706	43129206
chrX	30907313	30907813
chr14	20929471	20929971
chr11	6411361	6411861
chr2	88355127	88355627
chr10	104473976	104474476
chr16	87984396	87984896
chr8	144691621	144692121
chr10	127407884	127408384
chr1	89458140	89458640
chr11	3444027	3444527
chr3	143690694	143691194
chr9	26946968	26947468
chr4	2263804	2264304
chr12	56223225	56223725
chr2	204103396	204103896
chr5	121297346	121297846
chr15	26327349	26327849
chr11	93474547	93475047
chr2	61765296	61765796
chr13	31039871	31040371
chr8	64080887	64081387
chr4	77069382	77069882
chr2	110371417	110371917
chr17	10600692	10601192
chr3	13521446	13521946
chr3	100120049	100120549
chr19	2841156	2841656
chr10	7829812	7830312
chr16	84150261	84150761
chr7	143599068	143599568
chr12	64173369	64173869
chr16	29801702	29802202
chr1	173837052	173837552
chr10	105677976	105678476
chr20	8000199	8000699
chr7	63386546	63387046
chr3	139108362	139108862
chr3	32726409	32726909
chr3	69788266	69788766
chr12	107380726	107381226
chr19	54694425	54694925
chr2	190305903	190306403
chr19	13858336	13858836
chr12	120314941	120315441
chr3	27410727	27411227
chr4	2243731	2244231
chr1	59762346	59762846
chr1	117664191	117664691
chr3	81810468	81810968
chr5	60627710	60628210
chr10	33247106	33247606
chr16	57219826	57220326
chr21	44313059	44313559
chr14	81636550	81637050
chr14	105957209	105957709
chr16	88729376	88729876
chr11	17099072	17099572
chr1	236767603	236768103
chr5	80597127	80597627
chr14	36278228	36278728
chr17	61920114	61920614
chr17	61818989	61819489
chr20	37590670	37591170
chr3	184016652	184017152
chr12	102455633	102456133
chr2	219270885	219271385
chr1	114889059	114889559
chr19	40791201	40791701
chr19	10946202	10946702
chr7	91569872	91570372
chr12	131356171	131356671
chr4	110736354	110736854
chr21	47878390	47878890
chr7	148936425	148936925
chr9	123883765	123884265
chr1	33430283	33430783
chr17	42852889	42853389
chr9	38392402	38392902
chr15	66678930	66679430
chr11	134093703	134094203
chrX	153606968	153607468
chr3	183892270	183892770
chr17	34136145	34136645
chr2	196521566	196522066
chr3	44379665	44380165
chr9	4679301	4679801
chr11	75525905	75526405
chr8	141521810	141522310
chr12	2999688	3000188
chr12	38710240	38710740
chr8	97657292	97657792
chr3	158361987	158362487
chr14	31889603	31890103
chr17	21187634	21188134
chr10	124739654	124740154
chr19	11707948	11708448
chr8	97273597	97274097
chr9	99212093	99212593
chr4	24586036	24586536
chr3	129612473	129612973
chr10	27149722	27150222
chr7	22862247	22862747
chr13	53024585	53025085
chr3	139396583	139397083
chr1	166808374	166808874
chr1	114447376	114447876
chr15	83478029	83478529
chr22	24950991	24951491
chrX	119384327	119384827
chr22	30162752	30163252
chr9	101867098	101867598
chr13	41768485	41768985
chr12	123717529	123718029
chr16	22308378	22308878
chr9	99180674	99181174
chrX	154444399	154444899
chr18	45457331	45457831
chr12	123868206	123868706
chr1	17231151	17231651
chr5	77656088	77656588
chr12	46122497	46122997
chr13	103451154	103451654
chr6	32095878	32096378
chr12	9102093	9102593
chr1	186649223	186649723
chr9	37485582	37486082
chr1	173446010	173446510
chr10	116697684	116698184
chr7	104585449	104585949
chr15	55489008	55489508
chr20	42142694	42143194
chr18	29522898	29523398
chr12	7125683	7126183
chr6	83777126	83777626
chr12	6960981	6961481
chr21	30397038	30397538
chr2	113032818	113033318
chr19	55628900	55629400
chr2	197036139	197036639
chr12	94853469	94853969
chr14	35761270	35761770
chr14	23790339	23790839
chr14	65453620	65454120
chr1	33282853	33283353
chr14	67826410	67826910
chr14	39901429	39901929
chr2	97481689	97482189
chrX	80377034	80377534
chr16	30389436	30389936
chr19	20958764	20959264
chr1	120190722	120191222
chrX	130037016	130037516
chr18	48724392	48724892
chr10	70660688	70661188
chr6	52368970	52369470
chr8	95835218	95835718
chr20	2451307	2451807
chr16	27561154	27561654
chr2	61108431	61108931
chr15	41575868	41576368
chr15	102264446	102264946
chr16	67595831	67596331
chr3	14219950	14220450
chr1	85527695	85528195
chr4	331223	331723
chr1	46216137	46216637
chr5	130970867	130971367
chr1	118148279	118148779
chr14	102605880	102606380
chr17	57784698	57785198
chr19	11615857	11616357
chr13	24463365	24463865
chr11	1410720	1411220
chr22	19109832	19110332
chr11	3400198	3400698
chr17	3539435	3539935
chr5	53606228	53606728
chr17	73900863	73901363
chr2	198569832	198570332
chr19	13049018	13049518
chr15	63481361	63481861
chr5	271315	271815
chr1	10270257	10270757
chr6	170863097	170863597
chr14	93673282	93673782
chr16	53164417	53164917
[truncated: 48,001 more rows]

## Sheet: S6B DAR Non_promoter
Chr	Start	End	Annotation	Detailed Annotation	Distance to TSS	Nearest PromoterID	Entrez ID	Nearest Unigene	Nearest Refseq	Nearest Ensembl	Gene Name	Gene Alias	Gene Description	Gene Type	N_003	N_005	N_006	B_001	B_002	B_003	B_004	Log2(Barrett's/Normal)
chr18	10417132	10417632	Intergenic	Intergenic	-3015	NR_110775	101927350	Hs.572523	NR_110775	ENSG00000260913	LINC01254	-	long intergenic non-protein coding RNA 1254	ncRNA	16.51	36.08	6.42	4.59	4.67	1.1	3.47	-2.43158
chr6	152915760	152916260	intron (NM_182961, intron 3 of 145)	L2a|LINE|L2	41976	NM_033071	23345	Hs.12967	NM_015293	ENSG00000131018	SYNE1	8B|ARCA1|C6orf98|CPG2|EDMD4|MYNE1|Nesp1|SCAR8|dJ45H2.2	spectrin repeat containing nuclear envelope protein 1	protein-coding	1.1	1.62	2.27	19.47	15.64	6.77	7.11	2.83889
chr14	90910383	90910883	Intergenic	Intergenic	-10941	NR_033986	400238	Hs.131037	NR_033986	ENSG00000233208	LINC00642	-	long intergenic non-protein coding RNA 642	ncRNA	13.39	35.11	8.39	3.01	3.02	3.3	4.34	-2.32858
chr11	63888382	63888882	intron (NM_014067, intron 3 of 10)	intron (NM_014067, intron 3 of 10)	17270	NM_013280	23769	Hs.584876	NM_013280	ENSG00000126500	FLRT1	SPG68	fibronectin leucine rich transmembrane protein 1	protein-coding	20.36	48.86	10.86	3.01	4.94	4.58	4.16	-2.54397
chr2	193967730	193968230	Intergenic	Intergenic	353409	NR_002769	64002	Hs.546994	NR_002769	ENSG00000227418	PCGEM1	LINC00071|NCRNA00071|PCAT9	PCGEM1, prostate-specific transcript (non-protein coding)	ncRNA	1.28	0.32	1.09	11.87	13.72	7.69	11.1	3.32595
chr21	42527992	42528492	Intergenic	Intergenic	-8251	NR_024100	284835	Hs.106234	NR_024100	ENSG00000226496	LINC00323	C21orf130|NCRNA00323|PRED42	long intergenic non-protein coding RNA 323	ncRNA	2.38	3.24	0.99	12.82	11.53	11.9	22.73	3.01953
chr7	47375680	47376180	intron (NM_022748, intron 20 of 30)	MER63D|DNA|hAT-Blackjack	245812	NM_022748	64759	Hs.520814	NM_022748	ENSG00000136205	TNS3	TEM6|TENS1	tensin 3	protein-coding	4.59	11.33	6.52	1.11	1.37	2.75	1.91	-2.42711
chr7	32376329	32376829	intron (NM_001322059, intron 1 of 17)	intron (NM_001322059, intron 1 of 17)	-37563	NM_001322058	5137	Hs.143821	NM_005020	ENSG00000154678	PDE1C	Hcam3|cam-PDE 1C|hCam-3	phosphodiesterase 1C	protein-coding	13.21	17.31	3.75	1.11	1.65	2.56	1.21	-2.95642
chr3	165573387	165573887	Intergenic	Intergenic	-18377	NR_137635	590	Hs.420483	NM_000055	ENSG00000114200	BCHE	CHE1|CHE2|E1	butyrylcholinesterase	protein-coding	13.57	16.99	5.23	1.58	2.2	2.75	1.21	-2.74377
chr8	37330011	37330511	intron (NR_121620, intron 3 of 6)	intron (NR_121620, intron 3 of 6)	21170	NR_121620	100507420	Hs.105962	NR_121620		LINC01605	-	long intergenic non-protein coding RNA 1605	ncRNA	1.1	2.1	2.37	17.89	7.41	9.15	11.1	2.94779
chr2	192093552	192094052	Intergenic	Intergenic	-16200	NM_001130158	4430	Hs.439620	NM_012223	ENSG00000128641	MYO1B	MMI-alpha|MMIa|MYH-1c|myr1	myosin IB	protein-coding	12.66	23.46	8.79	3.48	4.39	1.28	1.56	-2.73424
chr16	12278371	12278871	intron (NM_032167, intron 13 of 20)	intron (NM_032167, intron 13 of 20)	208030	NM_032167	92017	Hs.458401	NM_032167	ENSG00000048471	SNX29	A-388D4.1|RUNDC2A	sorting nexin 29	protein-coding	8.44	22	3.75	3.48	0.82	1.28	1.73	-2.67283
chr4	36981105	36981605	Intergenic	L2a|LINE|L2	-22046	NR_134669	100508631	Hs.397553	NR_134669	ENSG00000261761	LOC100508631	-	uncharacterized LOC100508631	ncRNA	1.83	1.46	3.36	17.89	23.88	15.2	7.81	2.7327
chr6	14930547	14931047	Intergenic	Intergenic	-315409	NM_004973	3720	Hs.269059	NM_004973	ENSG00000008083	JARID2	JMJ	jumonji and AT-rich interaction domain containing 2	protein-coding	4.22	4.04	1.48	21.05	14.82	9.34	17.87	2.3403
chr6	119630153	119630653	intron (NM_005907, intron 2 of 12)	intron (NM_005907, intron 2 of 12)	40528	NM_005907	4121	Hs.102788	NM_005907	ENSG00000111885	MAN1A1	HUMM3|HUMM9|MAN9	mannosidase alpha class 1A member 1	protein-coding	1.83	1.13	1.78	6.33	19.21	10.25	5.73	2.44104
chr2	134862190	134862690	Intergenic	MamRep488|DNA|hAT	-22256	NR_037450	100500878		NR_037450	ENSG00000263813	MIR3679	mir-3679	microRNA 3679	ncRNA	2.2	2.27	1.78	12.35	6.59	10.07	17.52	2.70278
chr3	40966148	40966648	Intergenic	Intergenic	-274517	NM_001330729	1499	Hs.476018	NM_001904	ENSG00000168036	CTNNB1	CTNNB|MRD19|armadillo	catenin beta 1	protein-coding	1.47	2.1	1.78	15.99	15.64	5.49	5.55	2.8908
chr11	109598683	109599183	Intergenic	Intergenic	306087	NM_207645	399947	Hs.172982	NM_207645	ENSG00000185742	C11orf87	LOH11CR1A|NEURIM1	chromosome 11 open reading frame 87	protein-coding	2.02	2.27	4.25	9.18	19.76	19.41	15.27	2.32963
chr8	59762660	59763160	intron (NM_014729, intron 4 of 8)	MER74B|LTR|ERVL	-190506	NM_003580	8439	Hs.372000	NM_003580	ENSG00000035681	NSMAF	FAN|GRAMD5	neutral sphingomyelinase activation associated factor	protein-coding	13.76	35.76	8	2.53	3.02	2.38	2.78	-2.76576
chr5	82872807	82873307	intron (NM_001164097, intron 12 of 13)	LTR44|LTR|ERV1	-14924	NR_136215	105379054	Hs.643801	NR_136215	ENSG00000249835	VCAN-AS1	-	VCAN antisense RNA 1	ncRNA	0.55	0.97	1.88	6.65	10.98	6.77	5.9	2.5952
chr7	134058979	134059479	Intergenic	MIRc|SINE|MIR	-57402	NM_032826	84912	Hs.490181	NM_032826	ENSG00000205060	SLC35B4	YEA|YEA4	solute carrier family 35 member B4	protein-coding	3.85	2.27	2.77	13.3	12.35	18.68	12.49	2.40679
chr11	80957927	80958427	Intergenic	MIRb|SINE|MIR	-484331	NR_120570	101928944	Hs.547927	NR_120570	ENSG00000255178	LOC101928944	-	uncharacterized LOC101928944	ncRNA	1.28	1.29	1.09	9.18	9.06	6.96	6.94	2.68164
chr5	8462588	8463088	non-coding (NR_039989, exon 2 of 2)	non-coding (NR_039989, exon 2 of 2)	1800	NR_039663	100616142		NR_039663	ENSG00000247516	MIR4458	mir-4458	microRNA 4458	ncRNA	1.28	0.81	2.67	14.72	9.88	10.25	7.81	2.43242
chr1	245663740	245664240	intron (NM_018012, intron 4 of 14)	intron (NM_018012, intron 4 of 14)	345703	NM_018012	55083	Hs.143134	NM_018012	ENSG00000162849	KIF26B	-	kinesin family member 26B	protein-coding	6.97	15.37	6.32	2.22	2.74	3.48	1.21	-2.39488
chr10	114040045	114040545	Intergenic	MIRb|SINE|MIR	-3119	NM_058222	6975	Hs.345485	NM_058222	ENSG00000119913	TECTB	-	tectorin beta	protein-coding	2.75	1.46	1.98	4.91	8.51	8.97	17.7	2.40308
chr3	110752514	110753014	Intergenic	Tigger3b|DNA|TcMar-Tigger	36042	NR_045114	100506555	Hs.535689	NR_045114		PVRL3-AS1	-	PVRL3 antisense RNA 1	ncRNA	1.28	1.13	1.98	9.66	6.86	5.49	10.93	2.47371
chr2	167814097	167814597	intron (NM_001079810, intron 2 of 9)	MamRep137|DNA|TcMar?	69350	NM_152381	129446	Hs.73680	NM_152381	ENSG00000163092	XIRP2	CMYA3	xin actin binding repeat containing 2	protein-coding	0.92	0.97	2.17	12.19	14.27	11.54	12.67	3.31994
chr13	47181819	47182319	intron (NM_001164211, intron 1 of 19)	intron (NM_001164211, intron 1 of 19)	54773	NM_015116	23143	Hs.507971	NM_015116	ENSG00000136141	LRCH1	CHDC1|NP81	leucine rich repeats and calponin homology domain containing 1	protein-coding	3.12	0.97	1.58	15.04	27.17	15.56	17.18	3.47462
chr3	166547699	166548199	Intergenic	Intergenic	-68522	NR_135545	105374194		NR_135545		LOC105374194	inv3q26.1	uncharacterized LOC105374194	ncRNA	1.28	1.46	1.48	15.67	6.31	4.76	7.98	2.66915
chr4	26781236	26781736	Intergenic	Intergenic	80380	NR_134675	105374546	Hs.548859	NR_134673		LOC105374546	-	uncharacterized LOC105374546	ncRNA	13.21	22.97	6.32	3.48	2.2	1.46	1.91	-2.63401
chr6	152598919	152599419	intron (NM_182961, intron 98 of 145)	intron (NM_182961, intron 98 of 145)	-92656	NM_001347701	23345	Hs.12967	NM_015293	ENSG00000131018	SYNE1	8B|ARCA1|C6orf98|CPG2|EDMD4|MYNE1|Nesp1|SCAR8|dJ45H2.2	spectrin repeat containing nuclear envelope protein 1	protein-coding	1.47	3.24	1.48	22.48	17.84	5.31	7.98	3.0192
chr12	19818351	19818851	Intergenic	MSTC-int|LTR|ERVL-MaLR	225086	NM_001267043	121536	Hs.126497	NM_153207	ENSG00000139154	AEBP2	-	AE binding protein 2	protein-coding	25.5	45.14	8.99	2.69	3.84	4.39	2.43	-2.9609
chr10	6260924	6261424	intron (NM_004566, intron 6 of 14)	intron (NM_004566, intron 6 of 14)	16334	NM_001323017	5209	Hs.195471	NM_004566	ENSG00000170525	PFKFB3	IPFK2|PFK2|iPFK-2	6-phosphofructo-2-kinase/fructose-2,6-biphosphatase 3	protein-coding	11.19	30.58	4.54	1.42	2.47	3.11	2.6	-2.57291
chr12	90026516	90027016	intron (NM_001001323, intron 4 of 20)	intron (NM_001001323, intron 4 of 20)	23078	NM_001682	490	Hs.506276	NM_001682	ENSG00000070961	ATP2B1	PMCA1|PMCA1kb	ATPase plasma membrane Ca2+ transporting 1	protein-coding	1.28	0.65	1.98	18.2	10.43	9.15	13.71	3.1566
chr5	159860945	159861445	Intergenic	Intergenic	12278	NM_001282383	9232	Hs.350966	NM_004219	ENSG00000164611	PTTG1	EAP1|HPTTG|PTTG|TUTR1	pituitary tumor-transforming 1	protein-coding	15.96	40.45	7.01	7.28	2.74	2.75	2.95	-2.59132
chr6	168734119	168734619	Intergenic	MSTA|LTR|ERVL-MaLR	-13935	NM_214462	168002	Hs.673059	NM_214462	ENSG00000164488	DACT2	C6orf116|DAPPER2|DPR2|bA503C24.7	dishevelled binding antagonist of beta catenin 2	protein-coding	1.83	0.65	2.27	9.5	10.7	8.79	13.53	2.37193
chr3	95062000	95062500	Intergenic	LTR72B|LTR|ERV1	339787	NR_077228	100287639	Hs.591320	NR_077228	ENSG00000244681	MTHFD2P1	-	methylenetetrahydrofolate dehydrogenase (NADP+ dependent) 2, methenyltetrahydrofolate cyclohydrolase pseudogene 1	pseudo	2.57	1.62	1.58	11.24	22.5	15.93	9.2	2.8317
chr11	102845596	102846096	Intergenic	Intergenic	-19383	NM_002427	4322	Hs.2936	NM_002427	ENSG00000137745	MMP13	CLG3|MANDP1|MDST|MMP-13	matrix metallopeptidase 13	protein-coding	1.1	1.29	1.19	10.6	5.76	8.79	10.06	2.94472
chr4	140809046	140809546	intron (NM_018717, intron 3 of 5)	intron (NM_018717, intron 3 of 5)	222374	NM_002413	4258	Hs.81874	NM_002413	ENSG00000085871	MGST2	GST2|MGST-II	microsomal glutathione S-transferase 2	protein-coding	15.59	15.53	6.72	1.9	3.57	0.92	1.56	-2.92049
chr11	77801507	77802007	Intergenic	LTR22C|LTR|ERVK	-10492	NM_004549	4718	Hs.407860	NM_004549	ENSG00000151366	NDUFC2	B14.5b|CI-B14.5b|HLC-1|NADHDH2	NADH:ubiquinone oxidoreductase subunit C2	protein-coding	2.02	2.75	0.79	7.91	11.25	8.97	11.62	2.57346
chr4	111094123	111094623	intron (NM_001130721, intron 2 of 4)	intron (NM_001130721, intron 2 of 4)	25398	NM_001130721	79071	Hs.412939	NM_024090	ENSG00000170522	ELOVL6	FACE|FAE|LCE	ELOVL fatty acid elongase 6	protein-coding	1.28	3.72	1.78	17.73	11.25	7.51	11.28	2.69061
chr12	97092726	97093226	intron (NM_001306084, intron 45 of 67)	MER51A|LTR|ERV1	-208025	NM_001135177	121441	Hs.270084	NM_152905	ENSG00000139350	NEDD1	GCP-WD|TUBGCP7	neural precursor cell expressed, developmentally down-regulated 1	protein-coding	1.1	1.13	1.48	7.76	16.47	12.82	17.52	4.01651
chr1	232454804	232455304	Intergenic	Intergenic	196300	NM_020808	57568	Hs.745009	NM_020808	ENSG00000116991	SIPA1L2	SPAL2	signal induced proliferation associated 1 like 2	protein-coding	14.86	28.47	6.81	1.27	2.47	3.3	1.21	-3.11673
chr8	26339444	26339944	Intergenic	Intergenic	31789	NM_007257	10687	Hs.591838	NM_007257	ENSG00000240694	PNMA2	MA2|MM2|RGAG2	paraneoplastic Ma antigen 2	protein-coding	1.47	1.62	2.07	9.5	9.61	12.27	13.01	2.61164
chr2	135189948	135190448	intron (NM_002410, intron 14 of 15)	intron (NM_002410, intron 14 of 15)	178368	NM_002410	4249	Hs.4988	NM_002410	ENSG00000152127	MGAT5	GNT-V|GNT-VA	mannosyl (alpha-1,6-)-glycoprotein beta-1,6-N-acetyl-glucosaminyltransferase	protein-coding	1.83	1.94	2.96	16.94	11.8	9.89	12.84	2.46615
chr3	82559270	82559770	Intergenic	MER52A|LTR|ERV1	-748570	NM_000158	2632	Hs.436062	NM_000158	ENSG00000114480	GBE1	APBD|GBE|GSD4	1,4-alpha-glucan branching enzyme 1	protein-coding	16.51	54.85	8.89	3.64	3.84	2.93	1.73	-2.90356
chr8	106861764	106862264	intron (NR_125796, intron 2 of 7)	L1PB1|LINE|L1	210717	NR_125797	102723356	Hs.571413	NR_125796		ZFPM2-AS1	-	ZFPM2 antisense RNA 1	ncRNA	28.07	38.67	10.07	3.48	1.92	2.2	2.78	-3.54029
chr5	147214877	147215377	intron (NM_003122, intron 1 of 4)	intron (NM_003122, intron 1 of 4)	3667	NM_003122	6690	Hs.407856	NM_003122	ENSG00000164266	SPINK1	PCTT|PSTI|Spink3|TATI|TCP	serine peptidase inhibitor, Kazal type 1	protein-coding	0.92	0.49	2.96	13.3	14.82	10.8	15.79	2.98681
chr10	112594472	112595090	intron (NM_001134363, intron 13 of 13)	intron (NM_001134363, intron 13 of 13)	35881	NR_026932	282997	Hs.599931	NR_026932		PDCD4-AS1	-	PDCD4 antisense RNA 1	ncRNA	26.78	40.61	13.04	9.02	4.67	2.38	3.82	-3.54312
chr12	67913475	67913975	promoter-TSS (NR_103861)	promoter-TSS (NR_103861)	-137	NR_103861	100507175	Hs.505986	NR_103861	ENSG00000203585	LOC100507175	-	uncharacterized LOC100507175	ncRNA	13.21	17.96	5.14	1.42	4.67	0.92	2.43	-2.33219
chr1	52442732	52443232	intron (NM_002867, intron 1 of 4)	intron (NM_002867, intron 1 of 4)	13454	NM_002867	5865	Hs.123072	NM_002867	ENSG00000169213	RAB3B	-	RAB3B, member RAS oncogene family	protein-coding	1.47	2.75	3.26	8.86	9.61	18.31	14.57	2.45757
chr10	16201654	16202154	Intergenic	Intergenic	-277038	NM_001261837	9317	Hs.444321	NM_030664	ENSG00000165983	PTER	HPHRP|RPR-1	phosphotriesterase related	protein-coding	1.1	0.81	1.98	28.33	6.86	2.01	12.14	3.26073
chr14	87175043	87175543	Intergenic	MIRc|SINE|MIR	-196829	NR_038445	283585	Hs.381998	NR_038445	ENSG00000258804	LINC01148	-	long intergenic non-protein coding RNA 1148	ncRNA	1.47	0.97	2.37	13.61	15.37	7.69	12.84	2.56171
chr6	154565443	154565943	intron (NM_001130700, intron 5 of 11)	intron (NM_001130700, intron 5 of 11)	85522	NM_001130699	26034	Hs.146100	NM_015553	ENSG00000074706	IPCEF1	PIP3-E	interaction protein for cytohesin exchange factors 1	protein-coding	13.57	17.31	4.54	1.74	1.92	2.2	1.91	-2.40042
chr4	111006263	111006763	intron (NM_001130721, intron 3 of 4)	intron (NM_001130721, intron 3 of 4)	113258	NM_001130721	79071	Hs.412939	NM_024090	ENSG00000170522	ELOVL6	FACE|FAE|LCE	ELOVL fatty acid elongase 6	protein-coding	1.83	3.4	2.47	13.14	15.92	11.54	13.71	2.46126
chr4	91104387	91104887	intron (NM_001145065, intron 1 of 10)	intron (NM_001145065, intron 1 of 10)	-51545	NM_207491	401145	Hs.654735	NM_207491	ENSG00000184305	CCSER1	FAM190A	coiled-coil serine rich protein 1	protein-coding	1.65	0.97	1.88	11.71	9.33	5.13	7.29	2.34412
chr8	42905862	42906362	Intergenic	L1ME3B|LINE|L1	-5330	NR_033698	2339	Hs.370312	NM_002027	ENSG00000168522	FNTA	FPTA|PGGT1A|PTAR2	farnesyltransferase, CAAX box, alpha	protein-coding	1.47	1.94	2.17	12.82	10.43	8.24	10.06	2.79379
chr1	246873071	246873571	Intergenic	Intergenic	-14057	NM_016002	51097	Hs.498397	NM_016002	ENSG00000143653	SCCPDH	CGI-49|NET11	saccharopine dehydrogenase (putative)	protein-coding	2.57	2.1	1.38	12.66	17.84	7.14	8.15	2.56012
chr2	76899863	76900363	Intergenic	L2a|LINE|L2	-312978	NR_110284	101927907	Hs.382185	NR_110284	ENSG00000234653	LOC101927907	-	uncharacterized LOC101927907	ncRNA	1.83	1.46	2.07	12.82	19.49	4.58	3.64	2.57207
chr1	109370981	109371481	intron (NR_049760, intron 9 of 13)	intron (NR_049760, intron 9 of 13)	28495	NM_152763	254268	Hs.729441	NM_152763	ENSG00000162641	AKNAD1	C1orf62	AKNA domain containing 1	protein-coding	13.76	34.62	5.63	3.8	2.47	1.28	2.95	-2.83288
chr4	100173818	100174318	intron (NR_037884, intron 4 of 9)	intron (NR_037884, intron 4 of 9)	-33665	NR_132990	130	Hs.586161	NM_000672	ENSG00000172955	ADH6	ADH-5	alcohol dehydrogenase 6 (class V)	protein-coding	11.19	14.88	5.23	1.58	1.65	3.66	1.56	-2.67197
chr14	86947407	86947907	Intergenic	MIR3|SINE|MIR	-424465	NR_038445	283585	Hs.381998	NR_038445	ENSG00000258804	LINC01148	-	long intergenic non-protein coding RNA 1148	ncRNA	1.1	0.97	1.68	15.51	7.68	8.06	8.67	2.92046
chr17	19610282	19610782	intron (NR_135624, intron 8 of 15)	intron (NR_135624, intron 8 of 15)	9511	NR_135625	146802	Hs.126830	NM_152908	ENSG00000180638	SLC47A2	MATE2|MATE2-B|MATE2-K|MATE2K	solute carrier family 47 member 2	protein-coding	20.54	37.7	7.51	3.8	1.1	3.85	4.51	-2.45258
chr5	159481772	159482272	intron (NM_003314, intron 7 of 7)	intron (NM_003314, intron 7 of 7)	45915	NM_003314	7265	Hs.519718	NM_003314	ENSG00000113312	TTC1	TPR1	tetratricopeptide repeat domain 1	protein-coding	2.02	0.49	1.98	9.02	7.68	5.86	8.85	2.38649
chr18	6203685	6204185	intron (NM_001330559, intron 12 of 18)	intron (NM_001330559, intron 12 of 18)	-52808	NR_110765	101927150		NR_110765		L3MBTL4-AS1	-	L3MBTL4 antisense RNA 1	ncRNA	18.34	25.56	8	2.22	6.04	2.93	3.3	-2.3582
chr18	43890135	43890635	Intergenic	Intergenic	-23802	NM_152470	494470	Hs.501114	NM_152470	ENSG00000141622	RNF165	ARKL2|RNF111L2	ring finger protein 165	protein-coding	8.62	33.98	8.1	2.22	1.65	1.65	2.6	-3.07035
chr4	15559323	15559823	intron (NM_001080522, intron 22 of 37)	intron (NM_001080522, intron 22 of 37)	88084	NM_020785	57545	Hs.590928	NM_020785	ENSG00000048342	CC2D2A	JBTS9|MKS6	coiled-coil and C2 domain containing 2A	protein-coding	0.92	2.59	1.48	10.13	21.13	13	20.99	3.49133
chr1	231045897	231046397	intron (NM_024525, intron 20 of 22)	intron (NM_024525, intron 20 of 22)	35555	NR_110681	101927604	Hs.638929	NR_110681	ENSG00000223393	LOC101927604	-	uncharacterized LOC101927604	ncRNA	6.05	26.21	5.93	0.95	2.74	0.92	2.95	-2.68345
chr11	27313782	27314282	Intergenic	Intergenic	70763	NM_030771	91057	Hs.143733	NM_030771	ENSG00000109881	CCDC34	L15|NY-REN-41|RAMA3	coiled-coil domain containing 34	protein-coding	1.83	1.62	2.07	10.76	12.08	11.9	15.09	2.85702
chr3	97590981	97591481	exon (NM_153605, exon 4 of 22)	exon (NM_153605, exon 4 of 22)	50347	NM_153605	131544	Hs.733378	NM_153605	ENSG00000080200	CRYBG3	DKFZp667G2110|vlAKAP	crystallin beta-gamma domain containing 3	protein-coding	11.56	23.78	4.74	2.85	1.65	1.83	3.3	-2.48887
chr2	104852827	104853327	Intergenic	(TG)n|Simple_repeat|Simple_repeat	171713	NR_037885	100287010	Hs.694603	NR_037885		LOC100287010	-	uncharacterized LOC100287010	ncRNA	2.2	0.32	1.98	10.29	13.72	8.79	17.52	2.88303
chr4	156624968	156625468	intron (NM_001130684, intron 3 of 8)	intron (NM_001130684, intron 3 of 8)	36403	NM_001130684	2982	Hs.24258	NM_000856	ENSG00000164116	GUCY1A3	GC-SA3|GUC1A3|GUCA3|GUCSA3|GUCY1A1|MYMY6	guanylate cyclase 1 soluble subunit alpha	protein-coding	0.73	0.49	0.49	5.54	8.78	7.69	3.99	3.83687
chr13	102769430	102769930	intron (NM_001321945, intron 2 of 5)	intron (NM_001321945, intron 2 of 5)	-71326	NR_039854	100616239		NR_039854	ENSG00000264482	MIR4705	-	microRNA 4705	ncRNA	14.86	23.3	6.22	3.32	2.2	1.46	1.73	-3.17785
chr9	93683251	93683751	Intergenic	Intergenic	93799	NM_001174167	6850	Hs.371720	NM_003177	ENSG00000165025	SYK	p72-Syk	spleen associated tyrosine kinase	protein-coding	9.91	28.31	8.1	0.95	2.74	2.56	2.6	-2.76913
chr6	23728924	23729424	Intergenic	MLT1J|LTR|ERVL-MaLR	-397240	NM_080723	140767	Hs.726270	NM_080723	ENSG00000152954	NRSN1	VMP|p24	neurensin 1	protein-coding	0.92	1.94	2.27	32.92	30.19	10.99	16.83	3.5801
chr1	10123891	10124391	intron (NM_006048, intron 1 of 26)	intron (NM_006048, intron 1 of 26)	31100	NM_006048	10277	Hs.593974	NM_006048	ENSG00000130939	UBE4B	E4|HDNB1|UBOX3|UFD2|UFD2A	ubiquitination factor E4B	protein-coding	8.62	22.97	3.65	0.63	0.82	2.2	1.73	-2.86634
chr3	4181103	4181603	Intergenic	Intergenic	-163635	NM_001320678	6419	Hs.475300	NM_006515	ENSG00000170364	SETMAR	METNASE|Mar1	SET domain and mariner transposase fusion gene	protein-coding	1.1	0.65	1.48	8.23	8.23	5.49	5.38	2.39889
chr5	116099666	116100166	Intergenic	Intergenic	-2011	NR_104678	102467223	Hs.570916	NR_104678		LOC102467223	-	uncharacterized LOC102467223	ncRNA	16.51	30.74	7.6	3.01	2.74	1.1	1.73	-3.23121
chr3	141549340	141549840	Intergenic	Intergenic	-45844	NM_001679	483	Hs.477789	NM_001679	ENSG00000069849	ATP1B3	ATPB-3|CD298	ATPase Na+/K+ transporting subunit beta 3	protein-coding	18.34	27.5	5.73	2.85	1.65	1.1	2.78	-3.02324
chr10	35194840	35195340	Intergenic	Intergenic	90394	NR_108043	100505601	Hs.549790	NR_108043	ENSG00000226386	PARD3-AS1	-	PARD3 antisense RNA 1	ncRNA	13.21	19.09	5.04	2.53	1.37	3.48	2.6	-2.39761
chr7	6443519	6444019	TTS (NM_006908)	TTS (NM_006908)	29643	NM_018890	5879	Hs.413812	NM_006908	ENSG00000136238	RAC1	MIG5|Rac-1|TC-25|p21-Rac1	ras-related C3 botulinum toxin substrate 1 (rho family, small GTP binding protein Rac1)	protein-coding	18.53	37.05	7.31	1.27	1.37	2.56	4.51	-2.94021
chr1	228972114	228972614	Intergenic	Intergenic	101540	NM_021205	58480	Hs.647774	NM_021205	ENSG00000116574	RHOU	ARHU|CDC42L1|G28K|WRCH1|hG28K	ras homolog family member U	protein-coding	1.83	3.4	1.68	8.71	7.41	7.69	13.01	2.51377
chr7	89699517	89700017	intron (NR_110029, intron 2 of 2)	L1PA5|LINE|L1	-48947	NR_003551	442523	Hs.406964	NR_003551	ENSG00000235436	DPY19L2P4	-	DPY19L2 pseudogene 4	pseudo	1.1	4.37	2.67	9.18	19.76	8.61	14.92	2.49624
chr9	88708620	88709120	intron (NM_177937, intron 1 of 9)	intron (NM_177937, intron 1 of 9)	5640	NM_016548	51280	Hs.494337	NM_016548	ENSG00000135052	GOLM1	C9orf155|GOLPH2|GP73|HEL46|PSEC0257|bA379P1.3	golgi membrane protein 1	protein-coding	1.65	4.85	1.98	39.41	26.62	18.68	32.1	3.4927
chr17	59325674	59326174	intron (NM_001330413, intron 23 of 25)	intron (NM_001330413, intron 23 of 25)	119141	NR_136397	101927855	Hs.662123	NR_136397	ENSG00000267131	LOC101927855	-	uncharacterized LOC101927855	ncRNA	0.73	1.46	1.58	5.54	6.31	10.8	5.03	2.55222
chr4	48683047	48683547	intron (NM_015030, intron 3 of 63)	intron (NM_015030, intron 3 of 63)	99019	NM_015030	285527	Hs.595553	NM_015030	ENSG00000075539	FRYL	AF4p12|KIAA0826|MOR2	FRY like transcription coactivator	protein-coding	2.02	0.49	0.89	8.71	9.06	6.59	9.2	2.73728
chr5	145300719	145301219	Intergenic	Intergenic	-15157	NM_152550	153769	Hs.443728	NM_152550	ENSG00000156463	SH3RF2	HEPP1|POSHER|PPP1R39|RNF158	SH3 domain containing ring finger 2	protein-coding	15.23	28.15	5.93	1.74	3.02	1.28	2.6	-2.92789
chr2	20569878	20570378	Intergenic	MLT1H2|LTR|ERVL-MaLR	-19517	NM_015317	23369	Hs.467824	NM_015317	ENSG00000055917	PUM2	PUMH2|PUML2	pumilio RNA binding family member 2	protein-coding	15.78	34.14	6.62	1.58	3.02	2.56	3.12	-2.86775
chr6	84686040	84686956	Intergenic	MER4-int|LTR|ERV1	-56880	NM_001346543	112609	Hs.370055	NM_138409	ENSG00000135324	MRAP2	C6orf117|bA51G5.2	melanocortin 2 receptor accessory protein 2	protein-coding	4.59	6.15	5.04	36.09	18.66	11.72	31.75	2.33379
chr9	1647722	1648222	Intergenic	MLT1F2|LTR|ERVL-MaLR	-367247	NM_001289397	6595	Hs.298990	NM_003070	ENSG00000080503	SMARCA2	BAF190|BRM|NCBRS|SNF2|SNF2L2|SNF2LA|SWI2|Sth1p|hBRM|hSNF2a	SWI/SNF related, matrix associated, actin dependent regulator of chromatin, subfamily a, member 2	protein-coding	10.27	20.87	6.91	2.22	1.65	1.65	2.6	-2.79124
chr20	1699575	1700075	Intergenic	LTR8|LTR|ERV1	60567	NR_037142	100289473	Hs.641525	NR_037142	ENSG00000232528	LOC100289473	-	cytoskeleton associated protein 2-like pseudogene	pseudo	6.05	19.25	5.73	1.11	1.92	3.11	1.91	-2.35434
chr7	69197181	69197681	intron (NM_015570, intron 1 of 18)	intron (NM_015570, intron 1 of 18)	133526	NM_001127231	26053	Hs.21631	NM_015570	ENSG00000158321	AUTS2	FBRSL2|MRD26	autism susceptibility candidate 2	protein-coding	2.2	0.97	1.88	18.52	17.02	7.87	11.97	2.91689
chr2	216394026	216394526	Intergenic	Tigger3c|DNA|TcMar-Tigger	75846	NR_110607	102724849	Hs.116161	NR_110607	ENSG00000225166	LOC102724849	-	uncharacterized LOC102724849	ncRNA	2.38	1.94	2.27	12.35	9.61	11.54	23.08	2.95083
chr3	65996412	65996912	intron (NM_015520, intron 1 of 24)	intron (NM_015520, intron 1 of 24)	27847	NM_015520	9223	Hs.476636	NM_004742	ENSG00000151276	MAGI1	AIP-3|AIP3|BAIAP1|BAP-1|BAP1|MAGI-1|Magi1d|TNRC19|WWP3	membrane associated guanylate kinase, WW and PDZ domain containing 1	protein-coding	12.66	22.33	6.02	1.58	3.29	1.28	2.6	-2.83639
chr2	121932313	121932813	Intergenic	Intergenic	110215	NM_014553	29842	Hs.156471	NM_014553	ENSG00000115112	TFCP2L1	CRTR1|LBP-9|LBP9	transcription factor CP2 like 1	protein-coding	11.92	37.21	8.1	1.58	5.49	2.56	2.78	-2.44062
chr11	129513149	129513749	Intergenic	Intergenic	-26285	NR_120582	101929557	Hs.385785	NR_120582	ENSG00000281097	LINC01395	-	long intergenic non-protein coding RNA 1395	ncRNA	22.38	37.7	8.2	2.06	2.74	4.21	3.3	-2.95668
chr14	89933218	89933718	intron (NM_001085471, intron 1 of 6)	intron (NM_001085471, intron 1 of 6)	49770	NR_036500	400236	Hs.585207	NR_036500	ENSG00000258920	FOXN3-AS1	-	FOXN3 antisense RNA 1	ncRNA	8.8	19.41	7.51	1.9	2.47	3.11	1.21	-2.58119
chr1	244231126	244231626	Intergenic	Intergenic	14869	NM_006352	10472	Hs.69997	NM_006352	ENSG00000179456	ZBTB18	C2H2-171|MRD22|RP58|TAZ-1|ZNF238	zinc finger and BTB domain containing 18	protein-coding	0.55	1.29	2.37	7.12	5.49	4.39	12.32	2.43455
chr2	68667666	68668166	Intergenic	Intergenic	26533	NR_133923	554251	Hs.164117	NM_001024680	ENSG00000204923	FBXO48	-	F-box protein 48	protein-coding	2.93	1.13	2.07	13.45	15.64	5.13	11.28	2.59883
chr4	14890305	14890805	promoter-TSS (NR_126435)	promoter-TSS (NR_126435)	-762	NR_126435	201853	Hs.551051	NR_126435	ENSG00000248360	LINC00504	-	long intergenic non-protein coding RNA 504	ncRNA	9.91	13.1	4.05	2.69	2.47	1.83	1.39	-2.35595
chr1	201280569	201281288	intron (NM_001005337, intron 2 of 13)	intron (NM_001005337, intron 2 of 13)	28349	NM_000299	5317	Hs.497350	NM_000299	ENSG00000081277	PKP1	B6P	plakophilin 1	protein-coding	40.17	82.84	11.95	7.12	6.31	6.77	6.94	-2.6058
chr5	130055989	130056489	Intergenic	Intergenic	444802	NR_073488	3094	Hs.483305	NM_005340	ENSG00000169567	HINT1	HINT|NMAN|PKCI-1|PRKCNH1	histidine triad nucleotide binding protein 1	protein-coding	0.92	1.29	1.19	6.01	4.39	7.51	4.16	2.32255
chr13	80435852	80436352	Intergenic	Intergenic	-10619	NR_120413	101927195	Hs.342412	NR_120413	ENSG00000229175	LINC00382	TCONS_00021500	long intergenic non-protein coding RNA 382	ncRNA	1.47	1.29	1.38	22.63	14.27	10.99	10.93	3.38623
chr16	23435857	23436357	exon (NM_153603, exon 7 of 17)	exon (NM_153603, exon 7 of 17)	28405	NM_153603	91949	Hs.185807	NM_153603	ENSG00000168434	COG7	CDG2E	component of oligomeric golgi complex 7	protein-coding	10.27	25.89	5.23	2.06	1.92	1.46	3.99	-2.37882
chr5	98360966	98361466	Intergenic	Intergenic	96378	NR_036530	100289230	Hs.552095	NR_036530		LOC100289230	-	uncharacterized LOC100289230	ncRNA	1.1	0.81	1.58	11.71	8.23	4.94	8.15	2.53389
chr1	169534873	169535373	intron (NM_000130, intron 3 of 24)	intron (NM_000130, intron 3 of 24)	20646	NM_000130	2153	Hs.30054	NM_000130	ENSG00000198734	F5	FVL|PCCF|RPRGL1|THPH2	coagulation factor V	protein-coding	1.28	1.62	1.58	10.13	9.61	8.61	7.29	2.67461
chr10	85568731	85569231	Intergenic	L2c|LINE|L2	-132136	NR_134317	105378397	Hs.147725	NR_134317		LOC105378397	-	uncharacterized LOC105378397	ncRNA	2.02	1.13	1.38	13.61	8.78	9.34	11.1	3.18038
chr2	221095277	221095777	Intergenic	Intergenic	-324241	NR_036228	100422959		NR_036228	ENSG00000266518	MIR4268	-	microRNA 4268	ncRNA	0.55	2.59	1.58	9.66	7.96	5.13	8.67	2.74101
chr7	21405803	21406303	Intergenic	Intergenic	-61599	NM_001326543	6671	Hs.88013	NM_003112	ENSG00000105866	SP4	HF1B|SPR-1	Sp4 transcription factor	protein-coding	1.28	1.13	0.89	11.08	9.06	4.58	10.06	2.91366
chr9	40791247	40791747	intron (NM_001317916, intron 1 of 4)	intron (NM_001317916, intron 1 of 4)	619	NM_001317916	26149	Hs.522147	NM_033160	ENSG00000274349	ZNF658	-	zinc finger protein 658	protein-coding	5.87	12.78	1.58	2.06	1.37	0.55	0.87	-2.51331
chr16	12124543	12125043	intron (NM_032167, intron 4 of 20)	MamRep38|DNA|hAT	54202	NM_032167	92017	Hs.458401	NM_032167	ENSG00000048471	SNX29	A-388D4.1|RUNDC2A	sorting nexin 29	protein-coding	9.72	28.64	5.14	1.27	1.1	3.3	2.6	-2.49651
chr1	239516768	239517268	Intergenic	Intergenic	-33212	NM_001347716	1131	Hs.7138	NM_000740	ENSG00000133019	CHRM3	EGBRS|HM3|PBS	cholinergic receptor muscarinic 3	protein-coding	0.92	1.94	1.88	18.99	12.9	8.42	6.94	2.81123
chr6	91554923	91555818	Intergenic	Intergenic	-258351	NM_003188	6885	Hs.594838	NM_003188	ENSG00000135341	MAP3K7	CSCF|FMD2|MEKK7|TAK1|TGF1a	mitogen-activated protein kinase kinase kinase 7	protein-coding	29.72	52.74	13.04	5.7	5.49	4.58	6.25	-2.72101
chr2	161695155	161695655	Intergenic	Intergenic	-298061	NM_133484	10010	Hs.132257	NM_004180	ENSG00000136560	TANK	I-TRAF|ITRAF|TRAF2	TRAF family member associated NFKB activator	protein-coding	1.1	0.97	1.28	14.25	8.78	8.24	7.81	3.20767
chr8	131107192	131107692	intron (NM_001247996, intron 25 of 30)	intron (NM_001247996, intron 25 of 30)	-10428	NR_045385	100507117	Hs.106015	NR_045385	ENSG00000280543	ASAP1-IT2	-	ASAP1 intronic transcript 2	ncRNA	2.02	2.91	1.78	12.19	7.41	7.51	11.28	2.34414
chr3	58562877	58563670	5' UTR (NM_001076778, exon 1 of 4)	5' UTR (NM_001076778, exon 1 of 4)	217	NM_001076778	11170	Hs.506357	NM_007177	ENSG00000168309	FAM107A	DRR1|TU3A	family with sequence similarity 107 member A	protein-coding	7.7	39.8	14.91	6.01	6.86	5.13	5.38	-2.3662
chr9	14294464	14294964	intron (NM_001190737, intron 2 of 10)	intron (NM_001190737, intron 2 of 10)	19331	NM_005596	4781	Hs.644095	NM_005596	ENSG00000147862	NFIB	CTF|HMGIC/NFIB|NF-I/B|NF1-B|NFI-B|NFI-RED|NFIB2|NFIB3	nuclear factor I B	protein-coding	1.83	1.13	1.09	13.61	9.61	6.96	7.46	3.08693
chr3	168770647	168771147	Intergenic	Intergenic	93196	NM_001105077	2122	Hs.744090	NM_004991	ENSG00000085276	MECOM	AML1-EVI-1|EVI1|KMT8E|MDS1|MDS1-EVI1|PRDM3|RUSAT2	MDS1 and EVI1 complex locus	protein-coding	11.92	26.37	3.85	0.79	2.2	2.75	1.04	-2.92877
chr12	20365586	20366086	Intergenic	Intergenic	-156343	NM_000921	5139	Hs.386791	NM_000921	ENSG00000172572	PDE3A	CGI-PDE|CGI-PDE A|CGI-PDE-A|HTNB	phosphodiesterase 3A	protein-coding	17.61	35.27	8.39	2.85	5.76	4.21	3.12	-2.38911
chr20	6684717	6685217	Intergenic	Intergenic	-63778	NM_001200	650	Hs.73853	NM_001200	ENSG00000125845	BMP2	BDA2|BMP2A	bone morphogenetic protein 2	protein-coding	3.67	2.43	2.37	17.73	14.55	9.15	9.2	2.38985
chr14	65491634	65492134	intron (NM_001202558, intron 5 of 12)	intron (NM_001202558, intron 5 of 12)	-19522	NR_039855	100616490		NR_039855	ENSG00000266531	MIR4706	mir-4706	microRNA 4706	ncRNA	3.12	19.74	3.85	1.58	0.27	0.92	2.6	-2.85179
chr3	178301892	178302392	intron (NM_001278911, intron 1 of 4)	intron (NM_001278911, intron 1 of 4)	25654	NM_001278911	10242	Hs.478368	NM_005832	ENSG00000197584	KCNMB2	-	potassium calcium-activated channel subfamily M regulatory beta subunit 2	protein-coding	8.44	24.75	5.83	1.11	3.29	2.2	2.08	-2.66912
chr20	53760091	53760591	Intergenic	Intergenic	-279240	NR_110629	102723578	Hs.446269	NR_110629	ENSG00000235166	LINC01440	-	long intergenic non-protein coding RNA 1440	ncRNA	2.57	1.62	1.78	7.76	14	10.07	9.37	2.38362
chr4	74469097	74469597	intron (NM_201431, intron 2 of 10)	intron (NM_201431, intron 2 of 10)	16940	NM_177532	166824	Hs.529677	NM_177532	ENSG00000169435	RASSF6	-	Ras association domain family member 6	protein-coding	1.65	1.78	3.06	9.81	9.06	13.37	22.03	2.32249
chr3	155230624	155231124	intron (NM_001130961, intron 11 of 23)	intron (NM_001130961, intron 11 of 23)	163231	NM_001130961	23007	Hs.567423	NM_014996	ENSG00000114805	PLCH1	PLCL3	phospholipase C eta 1	protein-coding	12.29	14.56	4.35	2.69	2.47	1.83	1.73	-2.53333
chr7	49709222	49710098	Intergenic	Intergenic	-103597	NM_198570	375567	Hs.629302	NM_198570	ENSG00000188730	VWC2	PSST739|UNQ739	von Willebrand factor C domain containing 2	protein-coding	25.5	38.83	11.65	5.54	4.12	3.85	3.12	-2.35892
chr4	37479748	37480248	intron (NM_001104629, intron 1 of 3)	intron (NM_001104629, intron 1 of 3)	24446	NM_001104629	55286	Hs.107527	NM_018302	ENSG00000154274	C4orf19	-	chromosome 4 open reading frame 19	protein-coding	2.38	1.62	1.19	13.93	14.27	4.21	11.1	2.56003
chr8	139272257	139272757	intron (NM_015912, intron 4 of 19)	LTR22B|LTR|ERVK	236558	NM_015912	51059	Hs.126024	NM_015912	ENSG00000147724	FAM135B	C8ORFK32	family with sequence similarity 135 member B	protein-coding	2.02	2.1	2.37	24.69	17.84	15.75	13.71	3.04317
chr2	165794554	165795054	intron (NM_001199148, intron 5 of 10)	MIR|SINE|MIR	17231	NM_001199148	151258	Hs.658702	NM_173512	ENSG00000169507	SLC38A11	AVT2	solute carrier family 38 member 11	protein-coding	0.73	0.49	1.09	12.98	15.92	5.31	7.63	3.47286
chr11	20077589	20078089	intron (NM_001111019, intron 9 of 27)	intron (NM_001111019, intron 9 of 27)	-6990	NR_046672	100874014	Hs.557916	NR_046672	ENSG00000254453	NAV2-AS2	-	NAV2 antisense RNA 2	ncRNA	14.31	17.96	6.42	3.32	3.57	2.75	1.04	-2.43617
chr20	10935060	10935560	Intergenic	Intergenic	-45390	NR_109866	101929413	Hs.385604	NR_109866	ENSG00000232900	LOC101929413	-	uncharacterized LOC101929413	ncRNA	11.92	13.75	4.54	2.69	1.65	1.1	2.95	-2.42873
chr20	50722470	50722970	promoter-TSS (NM_001319146)	promoter-TSS (NM_001319146)	-697	NM_001319146	55734	Hs.473082	NM_018197	ENSG00000020256	ZFP64	ZNF338	ZFP64 zinc finger protein	protein-coding	12.47	29.12	4.35	2.06	2.2	1.65	2.08	-2.85162
chr14	90139168	90139668	Intergenic	Intergenic	-53924	NM_001085471	1112	Hs.434286	NM_005197	ENSG00000053254	FOXN3	C14orf116|CHES1|PRO1635	forkhead box N3	protein-coding	1.65	1.78	2.17	10.13	12.35	5.86	12.14	2.57477
chr15	62480008	62480508	Intergenic	Intergenic	-22776	NM_001007595	388125	Hs.144372	NM_001007595	ENSG00000205502	C2CD4B	FAM148B|NLF2	C2 calcium dependent domain containing 4B	protein-coding	8.62	13.75	4.64	2.22	1.65	1.83	1.21	-2.67971
chr2	53331437	53331937	Intergenic	Intergenic	-401934	NR_039630	100616431		NR_039630	ENSG00000264975	MIR4431	-	microRNA 4431	ncRNA	1.83	0.65	1.88	6.17	16.19	11.54	9.2	2.68018
chr18	25439929	25440429	Intergenic	Intergenic	176370	NM_001308176	1000	Hs.464829	NM_001792	ENSG00000170558	CDH2	CD325|CDHN|CDw325|NCAD	cadherin 2	protein-coding	15.23	14.08	6.72	2.37	4.12	1.46	1.91	-2.39608
chr12	747045	747545	intron (NR_122124, intron 3 of 4)	intron (NR_122124, intron 3 of 4)	5556	NM_001294346	4815	Hs.655804	NM_016533	ENSG00000171840	NINJ2	-	ninjurin 2	protein-coding	10.27	37.21	6.52	2.37	1.65	2.2	2.26	-2.74575
chr8	80366822	80367322	Intergenic	Tigger3c|DNA|TcMar-Tigger	-155977	NM_007029	11075	Hs.521651	NM_007029	ENSG00000104435	STMN2	SCG10|SCGN10	stathmin 2	protein-coding	0.92	0.97	1.68	4.43	11.53	7.14	11.8	2.83272
chr12	68141546	68142365	Intergenic	Intergenic	-18701	NR_110063	101927901	Hs.369609	NR_110063	ENSG00000255970	LOC101927901	-	uncharacterized LOC101927901	ncRNA	3.12	4.53	4.15	29.12	23.05	20.14	27.41	3.1968
chr6	90094916	90095416	intron (NM_021244, intron 2 of 6)	intron (NM_021244, intron 2 of 6)	26829	NM_021244	58528	Hs.31712	NM_021244	ENSG00000025039	RRAGD	RAGD|bA11D8.2.1	Ras related GTP binding D	protein-coding	27.52	67.63	8.2	2.69	3.84	3.3	3.82	-3.05631
chr14	36852796	36853642	Intergenic	Intergenic	-63337	NM_001308110	51562	Hs.368647	NM_016586	ENSG00000151332	MBIP	-	MAP3K12 binding inhibitory protein 1	protein-coding	17.98	49.18	8.79	3.64	3.84	2.75	3.12	-2.69497
chr9	121850263	121850763	Intergenic	Intergenic	281226	NM_014618	1620	Hs.532316	NM_014618	ENSG00000078725	BRINP1	DBC1|DBCCR1|FAM5A	BMP/retinoic acid inducible neural specific 1	protein-coding	5.69	28.8	3.75	1.11	2.47	1.83	1.21	-2.96549
chr16	74885708	74886208	Intergenic	Intergenic	-77229	NM_024306	79152	Hs.461329	NM_024306	ENSG00000103089	FA2H	FAAH|FAH1|FAXDC1|SCS7|SPG35	fatty acid 2-hydroxylase	protein-coding	1.65	0.81	0.99	11.24	6.59	9.15	12.84	2.80275
chr22	41983674	41984174	intron (NM_002676, intron 1 of 7)	intron (NM_002676, intron 1 of 7)	1947	NM_002676	5372	Hs.75835	NM_002676	ENSG00000100417	PMM1	Sec53	phosphomannomutase 1	protein-coding	3.67	1.62	1.09	18.84	24.97	24.54	34.01	3.76167
chr12	59159712	59160212	intron (NR_120452, intron 1 of 7)	L2a|LINE|L2	15536	NR_120452	101927653	Hs.130744	NR_120452	ENSG00000257259	LOC101927653	-	uncharacterized LOC101927653	ncRNA	1.83	2.75	0.79	7.6	12.35	2.93	6.07	2.38048
chr7	150504873	150505373	Intergenic	L1PA6|LINE|L1	-6675	NM_014020	28959	Hs.647090	NM_014020	ENSG00000106565	TMEM176B	LR8|MS4B2	transmembrane protein 176B	protein-coding	0.92	3.88	2.07	12.98	10.43	6.96	11.8	2.41152
chr13	97818041	97818541	Intergenic	Intergenic	13585	NR_125725	103625683	Hs.679591	NR_125725	ENSG00000233124	LINC00456	-	long intergenic non-protein coding RNA 456	ncRNA	0.73	3.4	0.99	11.08	8.78	4.94	8.85	2.40276
chr1	208382637	208383137	intron (NM_025179, intron 3 of 31)	intron (NM_025179, intron 3 of 31)	34778	NM_025179	5362	Hs.497626	NM_025179	ENSG00000076356	PLXNA2	OCT|PLXN2	plexin A2	protein-coding	20.91	43.68	8.59	3.48	3.29	2.01	1.91	-3.12163
chr6	71994433	71994933	Intergenic	MER91A|DNA|hAT-Tip100	-3462	NM_024576	79627	Hs.648434	NM_024576	ENSG00000119900	OGFRL1	dJ331H24.1	opioid growth factor receptor like 1	protein-coding	8.62	17.31	5.33	1.9	1.1	2.56	2.43	-2.32843
chr9	111434780	111435280	Intergenic	Intergenic	183245	NM_006686	10880	Hs.534390	NM_006686	ENSG00000148156	ACTL7B	Tact1	actin like 7B	protein-coding	15.23	29.61	8.59	3.8	3.57	1.28	3.99	-2.56896
chr3	24565754	24566254	Intergenic	Intergenic	-3078	NR_039955	100616448		NR_039955	ENSG00000265028	MIR4792	miR-4792	microRNA 4792	ncRNA	3.67	3.56	2.37	15.83	18.11	16.11	14.75	2.3369
chr2	222581076	222581576	Intergenic	Intergenic	-142404	NM_001304536	2043	Hs.371218	NM_004438	ENSG00000116106	EPHA4	HEK8|SEK|TYRO1	EPH receptor A4	protein-coding	1.28	1.13	1.09	6.65	11.53	8.24	9.72	3.00664
chr15	24005180	24005680	Intergenic	Intergenic	-72980	NM_002487	4692	Hs.50130	NM_002487	ENSG00000182636	NDN	HsT16328|PWCR	necdin, MAGE family member	protein-coding	10.82	16.02	6.72	0.63	1.65	4.03	0.87	-2.81503
chr10	1105657	1106157	intron (NM_014023, intron 1 of 13)	AluSx|SINE|Alu	3131	NM_014023	22884	Hs.188495	NM_014023	ENSG00000047056	WDR37	-	WD repeat domain 37	protein-coding	12.66	23.78	7.31	1.9	1.37	1.83	3.3	-2.78705
chr10	66627253	66627991	Intergenic	MER61E|LTR|ERV1	42337	NR_001446	305	Hs.591361	NR_001446		ANXA2P3	ANX2L3|ANX2P3|LIP2|LPC2C	annexin A2 pseudogene 3	pseudo	2.57	2.43	2.17	28.49	17.84	10.25	13.53	2.49849
chr1	238481505	238482005	Intergenic	Intergenic	167562	NR_015407	339535	Hs.532047	NR_015407	ENSG00000215808	LINC01139	LINKA	long intergenic non-protein coding RNA 1139	ncRNA	1.28	0.81	2.07	10.13	14.27	9.34	7.98	2.93441
chr1	68097344	68097844	Intergenic	Intergenic	-53266	NM_001199741	1647	Hs.80409	NM_001924	ENSG00000116717	GADD45A	DDIT1|GADD45	growth arrest and DNA damage inducible alpha	protein-coding	2.2	4.21	1.58	19.15	29.64	19.41	14.92	3.33551
chr10	8477179	8477679	Intergenic	Intergenic	158925	NR_134492	105376398	Hs.63158	NR_134492		LOC105376398	-	uncharacterized LOC105376398	ncRNA	14.67	42.55	6.81	2.22	1.92	1.46	2.6	-3.12154
chr1	65573525	65574361	Intergenic	Intergenic	-39289	NM_203464	205	Hs.10862	NM_013410	ENSG00000162433	AK4	AK 4|AK3|AK3L1|AK3L2	adenylate kinase 4	protein-coding	2.93	2.43	2.67	30.39	37.87	23.44	44.24	3.45851
chr5	175974797	175975297	intron (NM_001171976, intron 1 of 31)	Tigger3a|DNA|TcMar-Tigger	-1296	NM_017675	54825	Hs.4205	NM_017675	ENSG00000074276	CDHR2	PCDH24|PCLKC	cadherin related family member 2	protein-coding	2.02	5.18	3.26	12.03	13.17	20.51	20.13	2.41997
chr2	60318972	60319472	Intergenic	Intergenic	290949	NR_132991	106660609	Hs.565545	NR_132991	ENSG00000223929	MIR4432HG	-	MIR4432 host gene	ncRNA	1.1	1.94	2.37	13.93	9.61	4.94	8.15	2.42219
chr14	36852796	36853642	Intergenic	Intergenic	-63337	NM_001308110	51562	Hs.368647	NM_016586	ENSG00000151332	MBIP	-	MAP3K12 binding inhibitory protein 1	protein-coding	17.98	49.18	8.79	3.64	3.84	2.75	3.12	-3.24128
chr20	33914883	33915383	intron (NM_001184977, intron 5 of 7)	intron (NM_001184977, intron 5 of 7)	-34908	NM_178468	128876	Hs.592149	NM_178468	ENSG00000125998	FAM83C	C20orf128|dJ614O4.7	family with sequence similarity 83 member C	protein-coding	2.57	1.46	1.68	9.5	6.86	12.63	10.76	2.55946
chr7	12981102	12981602	Intergenic	Intergenic	254441	NM_005738	10124	Hs.245540	NM_005738	ENSG00000122644	ARL4A	ARL4	ADP ribosylation factor like GTPase 4A	protein-coding	8.25	12.13	3.75	3.17	0.82	1.28	1.21	-2.43783
chr21	37425092	37425592	intron (NM_001007259, intron 4 of 6)	MLT1J|LTR|ERVL-MaLR	7320	NM_001007259	54093	Hs.606200	NM_017438	ENSG00000185917	SETD4	C21orf18|C21orf27	SET domain containing 4	protein-coding	9.91	20.22	6.02	1.74	3.57	2.38	2.26	-2.37714
chr3	152356810	152357310	Intergenic	Intergenic	-195422	NM_002563	5028	Hs.79881	NM_002563	ENSG00000169860	P2RY1	P2Y1	purinergic receptor P2Y1	protein-coding	5.14	9.38	3.95	1.27	3.02	1.1	1.21	-2.34355
chr5	147470190	147470878	intron (NM_006846, intron 7 of 32)	intron (NM_006846, intron 7 of 32)	26999	NM_001127699	11005	Hs.331555	NM_006846	ENSG00000133710	SPINK5	LEKTI|LETKI|NETS|NS|VAKTI	serine peptidase inhibitor, Kazal type 5	protein-coding	6.42	2.59	2.86	11.71	14	19.23	21.34	2.52218
chr5	16521552	16522052	intron (NM_001034850, intron 3 of 8)	intron (NM_001034850, intron 3 of 8)	-12695	NM_019000	54463	Hs.481704	NM_019000	ENSG00000154153	FAM134B	JK-1|JK1	family with sequence similarity 134 member B	protein-coding	2.93	1.13	2.27	7.76	21.13	15.75	10.93	2.5849
chr17	17780145	17780645	intron (NM_001288789, intron 4 of 12)	intron (NM_001288789, intron 4 of 12)	-40070	NM_004176	6720	Hs.592123	NM_004176	ENSG00000072310	SREBF1	SREBP-1c|SREBP1|SREBP1a|bHLHd1	sterol regulatory element binding transcription factor 1	protein-coding	9.91	22.65	8.1	1.9	3.84	2.2	1.56	-2.45715
chr3	27402016	27402516	intron (NM_152534, intron 2 of 38)	intron (NM_152534, intron 2 of 38)	8685	NM_199347	152110	Hs.506115	NM_152534	ENSG00000163491	NEK10	-	NIMA related kinase 10	protein-coding	2.93	0.65	1.88	12.98	11.8	4.39	9.89	2.40733
chr16	52485772	52486272	intron (NM_001146188, intron 4 of 7)	intron (NM_001146188, intron 4 of 7)	94784	NM_001080430	27324	Hs.132574	NM_001080430	ENSG00000103460	TOX3	CAGF9|TNRC9	TOX high mobility group box family member 3	protein-coding	0.73	1.78	2.37	9.02	15.37	10.62	12.67	2.7434
chr9	90184904	90185404	intron (NM_001288729, intron 2 of 25)	intron (NM_001288729, intron 2 of 25)	71704	NM_001288729	1612	Hs.380277	NM_004938	ENSG00000196730	DAPK1	DAPK	death associated protein kinase 1	protein-coding	1.28	1.13	0.69	12.19	14.55	9.15	10.06	3.76719
chr3	29106915	29107415	Intergenic	Intergenic	215265	NR_109804	100873979	Hs.99391	NR_109804		RBMS3-AS3	-	RBMS3 antisense RNA 3	ncRNA	12.47	32.2	3.56	4.59	1.65	0.55	4.34	-2.37242
chr12	98967908	98968408	Intergenic	Intergenic	-19245	NM_002635	5250	Hs.290404	NM_002635	ENSG00000075415	SLC25A3	OK/SW-cl.48|PHC|PTP	solute carrier family 25 member 3	protein-coding	2.2	0.97	1.48	14.56	24.43	13	22.73	3.54958
chr1	85308424	85308924	intron (NM_012152, intron 2 of 2)	intron (NM_012152, intron 2 of 2)	50222	NM_012152	23566	Hs.527909	NM_012152	ENSG00000171517	LPAR3	EDG7|Edg-7|GPCR|HOFNH30|LP-A3|LPA3|RP4-678I3	lysophosphatidic acid receptor 3	protein-coding	13.39	29.61	5.53	2.69	1.92	2.01	0.52	-3.32189
chr18	54937284	54937784	Intergenic	Intergenic	-82187	NM_015879	51046	Hs.23172	NM_015879	ENSG00000177511	ST8SIA3	SIAT8C|ST8SiaIII	ST8 alpha-N-acetyl-neuraminide alpha-2,8-sialyltransferase 3	protein-coding	2.2	0.16	1.09	8.23	11.8	7.69	9.37	3.09081
chr15	95067728	95068228	Intergenic	LTR8A|LTR|ERV1	168814	NM_001159644	55784	Hs.33368	NM_018349	ENSG00000140563	MCTP2	-	multiple C2 and transmembrane domain containing 2	protein-coding	2.2	2.1	1.68	7.91	17.29	8.97	13.36	2.65089
chr8	42334202	42334702	intron (NM_006749, intron 1 of 10)	intron (NM_006749, intron 1 of 10)	24526	NM_001257180	6575	Hs.653173	NM_006749	ENSG00000168575	SLC20A2	GLVR-2|GLVR2|IBGC1|IBGC3|MLVAR|PIT-2|PIT2|RAM1|Ram-1	solute carrier family 20 member 2	protein-coding	3.49	2.75	2.37	11.55	14.55	11.72	17.7	2.32263
chr10	105553922	105554422	intron (NM_014631, intron 2 of 13)	intron (NM_014631, intron 2 of 13)	47635	NR_038940	100505839	Hs.655149	NR_038940	ENSG00000280693	SH3PXD2A-AS1	-	SH3PXD2A antisense RNA 1	ncRNA	3.3	7.12	4.84	26.75	18.39	20.32	25.68	2.3878
chr2	147789417	147789917	Intergenic	Intergenic	445042	NR_026904	728773	Hs.334462	NR_026904		PABPC1P2	PABP2|PABP4|PABPCP2|PABPCP4	poly(A) binding protein cytoplasmic 1 pseudogene 2	pseudo	1.47	2.43	1.09	13.45	8.23	11.54	14.57	3.18779
chr8	60304533	60305033	Intergenic	Intergenic	-273016	NM_014729	9760	Hs.491805	NM_014729	ENSG00000198846	TOX	TOX1	thymocyte selection associated high mobility group box	protein-coding	0.18	1.13	1.98	15.35	10.43	12.45	10.76	3.35658
chr4	170106510	170107010	intron (NM_020870, intron 2 of 11)	intron (NM_020870, intron 2 of 11)	85489	NM_020870	57630	Hs.301804	NM_020870	ENSG00000154447	SH3RF1	POSH|RNF142|SH3MD2	SH3 domain containing ring finger 1	protein-coding	2.2	2.27	2.37	14.88	9.88	9.34	11.28	2.41724
chr2	60705999	60706499	intron (NM_138559, intron 2 of 4)	intron (NM_138559, intron 2 of 4)	74384	NM_018014	53335	Hs.370549	NM_018014	ENSG00000119866	BCL11A	BCL11A-L|BCL11A-S|BCL11A-XL|BCL11a-M|CTIP1|DILOS|EVI9|HBFQTL5|ZNF856	B-cell CLL/lymphoma 11A	protein-coding	17.43	27.34	6.12	2.85	2.74	5.31	2.26	-2.43937
chr22	31343101	31343601	intron (NM_014941, intron 6 of 26)	intron (NM_014941, intron 6 of 26)	20922	NM_001303256	22880	Hs.555918	NM_014941	ENSG00000133422	MORC2	CMT2Z|ZCW3|ZCWCC1	MORC family CW-type zinc finger 2	protein-coding	17.06	34.46	5.83	2.85	0.82	2.93	3.47	-2.77799
chr2	190387352	190387852	Intergenic	Intergenic	57935	NM_014585	30061	Hs.643005	NM_014585	ENSG00000138449	SLC40A1	FPN1|HFE4|IREG1|MST079|MSTP079|MTP1|SLC11A3	solute carrier family 40 member 1	protein-coding	2.57	2.91	2.47	19.63	18.66	9.89	9.72	2.59437
chr14	65071575	65072075	Intergenic	Intergenic	55205	NM_172365	145376	Hs.144696	NM_172365	ENSG00000165807	PPP1R36	C14orf50	protein phosphatase 1 regulatory subunit 36	protein-coding	9.91	27.18	3.06	2.37	3.57	1.1	1.21	-2.47049
chr5	16573452	16573952	intron (NM_001034850, intron 1 of 8)	intron (NM_001034850, intron 1 of 8)	-42333	NR_109946	101929524	Hs.734029	NR_109946	ENSG00000246214	LOC101929524	-	uncharacterized LOC101929524	ncRNA	0.55	1.62	2.86	8.23	17.56	12.45	10.24	2.68189
chr2	105505648	105506148	Intergenic	MER61A|LTR|ERV1	-16845	NR_110373	102682016	Hs.638438	NR_110373	ENSG00000229743	LINC01159	linc-Brn1b	long intergenic non-protein coding RNA 1159	ncRNA	2.38	2.59	3.36	13.45	22.23	19.04	7.81	2.51246
chr20	32157583	32158083	intron (NM_001039709, intron 1 of 10)	AluSx|SINE|Alu	7662	NM_005093	9139	Hs.153934	NM_005093	ENSG00000078699	CBFA2T2	EHT|MTGR1|ZMYND3|p85	CBFA2/RUNX1 translocation partner 2	protein-coding	6.24	13.91	2.96	0.16	1.37	2.2	0.69	-2.90495
chr7	73726931	73727431	intron (NM_003388, intron 1 of 16)	intron (NM_003388, intron 1 of 16)	23376	NM_003388	7461	Hs.647018	NM_003388	ENSG00000106665	CLIP2	CLIP|CLIP-115|CYLN2|WBSCR3|WBSCR4|WSCR3|WSCR4	CAP-Gly domain containing linker protein 2	protein-coding	9.91	29.28	5.23	1.42	1.92	3.48	1.21	-2.66372
chr15	36061083	36061583	intron (NR_038251, intron 2 of 2)	intron (NR_038251, intron 2 of 2)	-157724	NR_039735	100616293		NR_039735	ENSG00000265098	MIR4510	mir-4510	microRNA 4510	ncRNA	1.83	0.32	1.28	10.76	4.94	6.04	8.67	2.46058
chr17	55491372	55491872	intron (NM_170721, intron 5 of 9)	L2b|LINE|L2	109336	NR_110808	101927557	Hs.639984	NR_110808	ENSG00000266100	LOC101927557	-	uncharacterized LOC101927557	ncRNA	1.47	4.21	1.78	5.07	15.09	11.17	11.1	2.51367
chr1	222773481	222773981	Intergenic	Intergenic	10430	NR_110614	100506161	Hs.553851	NR_110613	ENSG00000225265	TAF1A-AS1	-	TAF1A antisense RNA 1	ncRNA	2.38	0.81	1.28	15.51	14	8.06	14.4	2.77617
chr5	83707531	83708031	Intergenic	Intergenic	-27096	NM_001278642	10085	Hs.482730	NM_005711	ENSG00000164176	EDIL3	DEL1	EGF like repeats and discoidin domains 3	protein-coding	12.11	21.19	5.73	2.06	2.74	2.38	2.95	-2.33271
chr1	210430948	210431448	Intergenic	Intergenic	-23732	NR_024337	574036	Hs.446946	NR_024337	ENSG00000203706	SERTAD4-AS1	C1orf133	SERTAD4 antisense RNA 1	ncRNA	19.81	42.55	10.37	3.01	5.49	2.38	3.47	-2.71515
chr12	55285794	55286294	Intergenic	Intergenic	37745	NM_058173	118430	Hs.348419	NM_058173	ENSG00000172551	MUCL1	SBEM	mucin like 1	protein-coding	2.02	2.27	1.88	30.55	23.05	12.45	20.99	3.31627
chr14	95935065	95935565	intron (NM_152592, intron 1 of 16)	MIR|SINE|MIR	6858	NM_152592	161176	Hs.41502	NM_024633	ENSG00000176438	SYNE3	C14orf139|C14orf49|LINC00341|NCRNA00341|NET53|Nesp3	spectrin repeat containing nuclear envelope family member 3	protein-coding	2.38	2.27	1.78	13.45	13.17	13.18	15.09	3.21494
chr11	111230859	111231359	intron (NM_006235, intron 1 of 4)	intron (NM_006235, intron 1 of 4)	12627	NR_039712	100616330		NR_039712	ENSG00000264032	MIR4491	mir-4491	microRNA 4491	ncRNA	2.57	3.56	4.64	23.9	29.37	22.89	25.5	2.79081
chr6	51187835	51188335	Intergenic	Intergenic	-298583	NR_125840	101927082	Hs.730296	NR_125840		LOC101927082	-	uncharacterized LOC101927082	ncRNA	12.29	23.3	6.12	1.58	2.2	2.93	3.3	-2.36342
chr4	155450865	155451365	Intergenic	Intergenic	20470	NM_001201564	5356	Hs.249996	NM_002669	ENSG00000171566	PLRG1	Cwc1|PRL1|PRP46|PRPF46|TANGO4	pleiotropic regulator 1	protein-coding	11.37	16.18	5.73	0.47	0.82	3.11	1.39	-2.98355
chr7	92832762	92833262	intron (NM_001346642, intron 4 of 9)	intron (NM_001346642, intron 4 of 9)	15896	NM_198151	253012	Hs.443169	NM_198151	ENSG00000188175	HEPACAM2	MIKI	HEPACAM family member 2	protein-coding	2.02	4.21	2.27	18.68	15.92	16.66	9.72	2.56516
chr1	145246096	145246596	intron (NM_203458, intron 1 of 4)	intron (NM_203458, intron 1 of 4)	37233	NM_203458	388677	Hs.655156	NM_203458	ENSG00000264343	NOTCH2NL	N2N	notch 2 N-terminal like	protein-coding	0.92	0.65	0.89	6.01	4.12	5.68	8.33	2.90851
chr3	16368041	16368541	exon (NM_015150, exon 8 of 10)	exon (NM_015150, exon 8 of 10)	61624	NM_001330670	92106	Hs.655449	NM_138381	ENSG00000154814	OXNAD1	-	oxidoreductase NAD binding domain containing 1	protein-coding	10.82	38.34	5.33	2.85	2.74	1.1	2.43	-3.00509
chr4	74889352	74889852	Intergenic	Intergenic	14888	NM_002090	2921	Hs.89690	NM_002090	ENSG00000163734	CXCL3	CINC-2b|GRO3|GROg|MIP-2b|MIP2B|SCYB3	C-X-C motif chemokine ligand 3	protein-coding	1.1	1.46	1.88	10.45	10.43	7.32	11.62	2.6649
chr4	158753649	158754149	Intergenic	Intergenic	260257	NR_026992	340017	Hs.428275	NR_026992	ENSG00000234111	LOC340017	-	uncharacterized LOC340017	ncRNA	0.73	0.32	1.88	12.19	7.96	3.11	4.16	2.66978
chr15	35292594	35293094	Intergenic	MLT2F|LTR|ERVL	-12347	NM_014106	54989	Hs.744990	NM_014106	ENSG00000198146	ZNF770	PRO1914	zinc finger protein 770	protein-coding	12.11	29.45	7.11	2.37	0.82	2.75	3.64	-2.60908
chr7	85394923	85395423	Intergenic	LTR22B|LTR|ERVK	344735	NR_134240	105375380	Hs.679608	NR_134240	ENSG00000225128	LINC00972	-	long intergenic non-protein coding RNA 972	ncRNA	1.83	1.46	1.19	13.93	17.84	5.31	2.78	3.10225
chr15	78666962	78667815	Intergenic	Intergenic	34723	NM_004378	1381	Hs.346950	NM_004378	ENSG00000166426	CRABP1	CRABP|CRABP-I|CRABPI|RBP5	cellular retinoic acid binding protein 1	protein-coding	7.15	7.6	10.37	27.54	23.6	24.54	30.19	2.45854
chr2	160965708	160966208	intron (NM_001282389, intron 13 of 14)	intron (NM_001282389, intron 13 of 14)	-46832	NM_001007267	22925	Hs.410477	NM_007366	ENSG00000153246	PLA2R1	CLEC13C|PLA2-R|PLA2G1R|PLA2IR|PLA2R	phospholipase A2 receptor 1	protein-coding	13.57	15.05	3.36	2.22	2.2	0.92	1.04	-2.85403
chr12	132039976	132040476	Intergenic	Intergenic	-155406	NM_004592	6433	Hs.308171	NM_004592	ENSG00000061936	SFSWAP	SFRS8|SWAP	splicing factor SWAP homolog	protein-coding	11.74	29.28	9.88	4.27	1.65	2.93	1.56	-2.68353
chr4	102571136	102571636	Intergenic	Intergenic	-140378	NM_017935	55024	Hs.480400	NM_017935	ENSG00000153064	BANK1	BANK	B-cell scaffold protein with ankyrin repeats 1	protein-coding	14.12	22.65	9.48	4.27	1.65	3.48	1.91	-2.61617
chr7	146778699	146779199	non-coding (NR_110829, exon 4 of 4)	non-coding (NR_110829, exon 4 of 4)	15752	NR_110829	101928700	Hs.571218	NR_110829	ENSG00000236795	LOC101928700	-	uncharacterized LOC101928700	ncRNA	1.1	1.94	2.67	17.89	18.11	12.27	9.72	2.95056
chr4	171163595	171164095	intron (NR_125889, intron 1 of 2)	intron (NR_125889, intron 1 of 2)	16103	NR_125889	101928223	Hs.254617	NR_125889		LINC01612	-	long intergenic non-protein coding RNA 1612	ncRNA	9.17	12.13	4.25	2.06	1.1	0.73	2.6	-2.33395
chr2	39731273	39731773	intron (NR_037875, intron 3 of 5)	intron (NR_037875, intron 3 of 5)	66966	NR_037875	728730	Hs.655344	NR_037875	ENSG00000231312	LOC728730	-	uncharacterized LOC728730	ncRNA	2.57	2.43	4.15	17.09	19.76	16.66	14.4	2.45294
chr11	120617819	120618319	intron (NM_001282470, intron 2 of 19)	intron (NM_001282470, intron 2 of 19)	71755	NR_133008	105369532	Hs.694510	NR_133008		LOC105369532	-	uncharacterized LOC105369532	ncRNA	14.12	17.63	4.84	1.9	4.12	2.2	2.6	-2.37083
chr8	82902811	82903311	Intergenic	L1PA6|LINE|L1	-148540	NM_022133	64089	Hs.492121	NM_022133	ENSG00000104497	SNX16	-	sorting nexin 16	protein-coding	0.37	4.21	3.65	13.77	17.56	9.52	11.97	2.37199
chr2	60321613	60322113	Intergenic	Intergenic	288308	NR_132991	106660609	Hs.565545	NR_132991	ENSG00000223929	MIR4432HG	-	MIR4432 host gene	ncRNA	1.83	3.07	3.65	15.83	21.96	15.93	19.43	2.61532
chr10	9866650	9867150	Intergenic	LTR9|LTR|ERV1	-233785	NR_120636	101928298	Hs.385576	NR_120636	ENSG00000224788	LOC101928298	-	uncharacterized LOC101928298	ncRNA	1.83	1.29	2.07	11.55	16.19	11.72	13.71	2.63014
chr8	128719688	128720188	intron (NR_117102, intron 2 of 3)	intron (NR_117102, intron 2 of 3)	26275	NR_117102	100270680	Hs.333720	NR_117101	ENSG00000249375	CASC11	CARLo-7|LINC00990|TCONS_00014535	cancer susceptibility candidate 11 (non-protein coding)	ncRNA	1.28	1.62	2.47	14.88	13.45	10.99	12.49	2.90263
chr8	36931192	36931692	Intergenic	Intergenic	-48029	NR_031672	100302233		NR_031672	ENSG00000221641	MIR1268A	MIR1268|MIRN1268|hsa-mir-1268|hsa-mir-1268a	microRNA 1268a	ncRNA	9.36	21.36	7.01	1.9	1.92	3.11	2.95	-2.42107
chr14	36677860	36678360	Intergenic	Intergenic	-32253	NR_049735	100886964	Hs.742592	NR_049735		PTCSC3	-	papillary thyroid carcinoma susceptibility candidate 3 (non-protein coding)	ncRNA	1.28	0.97	1.58	14.72	11.25	6.41	11.97	2.94424
chr7	144527090	144527590	intron (NM_001042482, intron 2 of 7)	intron (NM_001042482, intron 2 of 7)	5806	NM_022445	27010	Hs.660232	NM_022445	ENSG00000196511	TPK1	HTPK1|PP20|THMD5	thiamin pyrophosphokinase 1	protein-coding	1.65	1.78	1.58	19.31	24.15	13.37	14.75	3.44382
chr11	110176215	110176715	Intergenic	Intergenic	-9028	NM_002906	5962	Hs.263671	NM_002906	ENSG00000137710	RDX	DFNB24	radixin	protein-coding	1.47	1.94	0.89	15.2	24.15	9.52	10.24	3.31675
chr3	152587795	152588295	Intergenic	Intergenic	35563	NM_002563	5028	Hs.79881	NM_002563	ENSG00000169860	P2RY1	P2Y1	purinergic receptor P2Y1	protein-coding	8.99	11	5.53	2.06	1.92	2.75	0.35	-2.71125
chr6	47315999	47316499	Intergenic	Intergenic	-38566	NM_014452	27242	Hs.443577	NM_014452	ENSG00000146072	TNFRSF21	BM-018|CD358|DR6	TNF receptor superfamily member 21	protein-coding	1.83	1.13	1.38	7.28	10.43	8.79	8.85	2.81792
chr6	149498297	149498797	Intergenic	Intergenic	-40513	NM_001292035	23118	Hs.269775	NM_015093	ENSG00000055208	TAB2	CHTD2|MAP3K7IP2|TAB-2	TGF-beta activated kinase 1/MAP3K7 binding protein 2	protein-coding	1.83	1.29	1.19	13.3	12.9	4.39	10.41	2.90545
chr8	143463222	143463722	intron (NM_001291931, intron 1 of 10)	intron (NM_001291931, intron 1 of 10)	21138	NM_001291931	203062	Hs.370931	NM_145003	ENSG00000171045	TSNARE1	-	t-SNARE domain containing 1	protein-coding	17.43	41.9	7.9	4.91	2.74	4.03	2.95	-2.60041
chr4	70698267	70698767	Intergenic	LTR76|LTR|ERV1	27353	NM_005420	6783	Hs.479898	NM_005420	ENSG00000109193	SULT1E1	EST|EST-1|ST1E1|STE	sulfotransferase family 1E member 1	protein-coding	2.93	1.94	2.96	19.31	24.7	10.62	11.1	2.7098
chr2	10368656	10369156	Intergenic	Intergenic	-36109	NR_036222	100422929		NR_036222	ENSG00000265418	MIR4261	-	microRNA 4261	ncRNA	2.38	2.75	3.26	17.89	10.43	13.55	20.3	2.56299
chr4	102177408	102177908	intron (NM_001130691, intron 1 of 12)	intron (NM_001130691, intron 1 of 12)	-15629	NR_107033	102465868		NR_107033	ENSG00000273882	MIR8066	hsa-mir-8066	microRNA 8066	ncRNA	2.2	2.91	1.78	18.68	13.72	11.72	9.89	2.37816
chrX	32285963	32286463	intron (NM_004006, intron 43 of 78)	intron (NM_004006, intron 43 of 78)	-112627	NM_004020	1756	Hs.495912	NM_000109	ENSG00000198947	DMD	BMD|CMD3B|DXS142|DXS164|DXS206|DXS230|DXS239|DXS268|DXS269|DXS270|DXS272|MRX85	dystrophin	protein-coding	1.83	2.59	1.38	10.76	9.06	4.39	14.05	2.39339
chr1	77013500	77014000	intron (NM_152996, intron 3 of 4)	intron (NM_152996, intron 3 of 4)	-319343	NM_001320274	81849	Hs.149201	NM_030965	ENSG00000117069	ST6GALNAC5	SIAT7-E|SIAT7E|ST6GalNAcV	ST6 N-acetylgalactosaminide alpha-2,6-sialyltransferase 5	protein-coding	2.02	2.43	2.37	23.27	32.11	18.31	16.83	3.80036
chr4	57026759	57027259	Intergenic	Intergenic	-9352	NM_020722	57482	Hs.596667	NM_020722	ENSG00000109265	KIAA1211	-	KIAA1211	protein-coding	0.55	0.65	1.78	5.7	10.15	12.27	4.68	2.99519
chr9	120253677	120254177	Intergenic	MER58A|DNA|hAT-Charlie	-76610	NM_014010	23245	Hs.601562	NM_014010	ENSG00000148219	ASTN2	bA67K19.1	astrotactin 2	protein-coding	2.2	1.78	2.37	22.63	13.17	7.87	13.19	2.57836
chr17	36070189	36070689	intron (NM_001304286, intron 5 of 6)	intron (NM_001304286, intron 5 of 6)	34630	NM_001304286	6928	Hs.191144	NM_000458	ENSG00000275410	HNF1B	FJHN|HNF-1-beta|HNF-1B|HNF1beta|HNF2|HPC11|LF-B3|LFB3|MODY5|TCF-2|TCF2|VHNF1	HNF1 homeobox B	protein-coding	1.28	2.91	3.36	13.93	16.47	20.32	20.47	3.09568
chr2	101441863	101442363	intron (NM_002518, intron 1 of 20)	intron (NM_002518, intron 1 of 20)	5500	NM_002518	4862	Hs.156832	NM_002518	ENSG00000170485	NPAS2	MOP4|PASD4|bHLHe9	neuronal PAS domain protein 2	protein-coding	2.93	1.46	2.27	15.83	17.02	9.89	12.84	2.59583
chr5	14977299	14977799	Intergenic	Intergenic	-105662	NM_054027	56172	Hs.156727	NM_054027	ENSG00000154122	ANKH	ANK|CCAL2|CMDJ|CPPDD|HANK|MANK	ANKH inorganic pyrophosphate transport regulator	protein-coding	2.02	1.13	0.69	8.86	11.25	7.69	7.46	2.87872
chr5	31221063	31221563	intron (NM_004932, intron 1 of 11)	intron (NM_004932, intron 1 of 11)	27551	NM_004932	1004	Hs.124776	NM_004932	ENSG00000113361	CDH6	CAD6|KCAD	cadherin 6	protein-coding	2.02	1.94	1.78	30.39	10.43	5.68	12.49	2.96995
chr6	153446078	153446578	intron (NM_012419, intron 1 of 4)	intron (NM_012419, intron 1 of 4)	6061	NM_012419	26575	Hs.166313	NM_012419	ENSG00000091844	RGS17	RGS-17|RGSZ2|hRGS17	regulator of G-protein signaling 17	protein-coding	1.47	0.97	1.78	17.41	6.31	8.06	8.15	2.6186
chr5	147588694	147589194	intron (NM_205841, intron 2 of 3)	intron (NM_205841, intron 2 of 3)	6587	NM_205841	404203	Hs.334274	NM_205841	ENSG00000178172	SPINK6	BUSI2|UNQ844	serine peptidase inhibitor, Kazal type 6	protein-coding	1.47	0.97	1.48	7.91	8.51	3.66	8.15	2.32218
chr8	98375802	98376302	intron (NR_125390, intron 2 of 2)	LTR84a|LTR|ERVL	82673	NR_125390	101927066	Hs.732112	NR_125390		LOC101927066	-	uncharacterized LOC101927066	ncRNA	2.57	1.78	1.19	15.67	7.41	9.7	5.73	2.50894
chrX	107244062	107244562	Intergenic	L1PA16|LINE|L1	-18712	NM_031273	56156	Hs.333130	NM_031273	ENSG00000170925	TEX13B	TGC3B|TSGA5	testis expressed 13B	protein-coding	10.09	35.27	4.64	4.12	1.65	1.1	3.99	-2.57845
chr2	84713392	84713892	Intergenic	Intergenic	-27056	NM_003849	8802	Hs.270428	NM_003849	ENSG00000163541	SUCLG1	GALPHA|MTDPS9|SUCLA1	succinate-CoA ligase alpha subunit	protein-coding	2.75	2.27	1.28	21.21	19.49	8.42	10.24	2.63603
chr8	5032861	5033361	Intergenic	L1ME3|LINE|L1	-180783	NM_033225	64478	Hs.571466	NM_033225	ENSG00000183117	CSMD1	PPP1R24	CUB and Sushi multiple domains 1	protein-coding	7.89	26.21	5.43	2.22	2.2	1.46	3.3	-2.46061
chr1	74688321	74688821	intron (NM_001112808, intron 3 of 26)	intron (NM_001112808, intron 3 of 26)	-12500	NM_015978	51086	Hs.480085	NM_015978	ENSG00000116783	TNNI3K	CARK|CCDD	TNNI3 interacting kinase	protein-coding	0.55	1.46	2.17	12.03	10.15	5.13	8.15	2.46903
chr2	18732397	18732897	Intergenic	L2a|LINE|L2	9312	NM_020905	57665	Hs.120319	NM_020905	ENSG00000240857	RDH14	PAN2|SDR7C4	retinol dehydrogenase 14 (all-trans/9-cis/11-cis)	protein-coding	2.02	1.13	1.19	13.77	6.31	7.87	17.7	2.96129
chr7	91671306	91671806	intron (NM_005751, intron 19 of 49)	intron (NM_005751, intron 19 of 49)	92284	NM_000786	1595	Hs.417077	NM_000786	ENSG00000001630	CYP51A1	CP51|CYP51|CYPL1|LDM|P450-14DM|P450L1	cytochrome P450 family 51 subfamily A member 1	protein-coding	2.75	0.32	1.19	13.3	14.82	14.65	10.58	3.05337
chr7	96357406	96357906	Intergenic	Intergenic	-18453	NM_006304	7979	Hs.489201	NM_006304	ENSG00000127922	SEM1	DSS1|ECD|SHFD1|SHFM1|SHSF1|Shfdg1	SEM1, 26S proteasome complex subunit	protein-coding	8.62	14.72	6.72	1.58	0.82	2.38	0.87	-3.38699
chr15	64311981	64312481	intron (NM_014326, intron 2 of 11)	intron (NM_014326, intron 2 of 11)	26290	NM_014326	23604	Hs.237886	NM_014326	ENSG00000035664	DAPK2	DRP-1|DRP1	death associated protein kinase 2	protein-coding	0.92	3.24	2.57	10.13	8.78	9.34	18.56	2.54334
chr3	137706893	137707393	Intergenic	Intergenic	-10515	NM_001002026	51208	Hs.655324	NM_016369	ENSG00000066405	CLDN18	SFTA5|SFTPJ	claudin 18	protein-coding	4.04	3.24	1.98	23.43	14.55	18.86	14.92	2.43353
chr21	27762491	27762991	Intergenic	Intergenic	-3213	NR_135516	100996571	Hs.570432	NR_135515	ENSG00000197934	CYYR1-AS1	-	cysteine and tyrosine rich 1 antisense RNA 1	ncRNA	15.41	21.84	6.72	1.58	3.84	2.2	2.6	-2.48292
chr6	80082907	80083407	Intergenic	Intergenic	-60056	NR_130915	80078		NR_130915		LCAL1	onco-lncRNA-27	lung cancer associated lncRNA 1	ncRNA	1.83	1.78	2.37	21.84	10.15	9.34	15.09	2.68521
chr7	15707546	15708046	non-coding (NR_134258, exon 1 of 4)	non-coding (NR_134258, exon 1 of 4)	224	NR_134258	105375166	Hs.658822	NR_134258	ENSG00000237070	LOC105375166	-	uncharacterized LOC105375166	ncRNA	0.37	1.94	1.38	7.6	19.76	13.55	7.81	3.56194
chr1	10555961	10556461	intron (NM_004565, intron 2 of 8)	intron (NM_004565, intron 2 of 8)	21208	NM_004565	5195	Hs.149983	NM_004565	ENSG00000142655	PEX14	NAPP2|PBD13A|Pex14p|dJ734G22.2	peroxisomal biogenesis factor 14	protein-coding	17.24	34.46	6.22	3.17	1.92	3.66	4.16	-2.46663
chr17	27908943	27909443	intron (NM_001085454, intron 4 of 20)	intron (NM_001085454, intron 4 of 20)	7417	NM_001085454	28964	Hs.514051	NM_014030	ENSG00000108262	GIT1	-	GIT ArfGAP 1	protein-coding	19.44	41.74	8.2	1.9	2.47	4.94	4.16	-2.59742
chrX	131638948	131639448	Intergenic	Intergenic	-15202	NM_001170704	55796	Hs.105134	NM_018388	ENSG00000076770	MBNL3	CHCR|MBLX|MBLX39|MBXL	muscleblind like splicing regulator 3	protein-coding	1.65	0.49	1.68	13.93	6.31	6.23	7.81	2.84699
chr5	149872114	149872614	Intergenic	Intergenic	-4976	NM_001301063	3340	Hs.222055	NM_001543	ENSG00000070614	NDST1	HSST|MRT46|NST1	N-deacetylase and N-sulfotransferase 1	protein-coding	18.71	32.84	10.37	3.32	3.02	4.39	2.6	-2.53501
chr4	190013709	190014209	Intergenic	MER51B|LTR|ERV1	-566801	NR_121679	101928971	Hs.519164	NR_121679	ENSG00000250739	LINC01262	TCONS_l2_00021807	long intergenic non-protein coding RNA 1262	ncRNA	1.83	1.29	2.27	11.55	5.21	7.51	11.97	2.44248
chr19	57813349	57813849	Intergenic	L1MA5|LINE|L1	-18266	NM_213598	125919	Hs.202544	NM_213598	ENSG00000178229	ZNF543	-	zinc finger protein 543	protein-coding	23.85	60.51	8.79	1.42	5.49	1.83	2.78	-3.31899
chr4	18618258	18618758	Intergenic	AluSq2|SINE|Alu	-595010	NM_153686	254251	Hs.446201	NM_153686	ENSG00000178177	LCORL	MLR1	ligand dependent nuclear receptor corepressor like	protein-coding	7.89	18.12	4.94	0.95	4.12	2.01	1.73	-2.51004
chr18	49434345	49434845	Intergenic	Intergenic	-431947	NM_005215	1630	Hs.162025	NM_005215	ENSG00000187323	DCC	CRC18|CRCR1|IGDCC1|MRMV1|NTN1R1	DCC netrin 1 receptor	protein-coding	1.28	1.29	1.68	10.13	10.7	8.24	9.54	3.18083
chr6	105984738	105985238	Intergenic	Intergenic	-133989	NM_002726	5550	Hs.436564	NM_002726	ENSG00000085377	PREP	PE|PEP	prolyl endopeptidase	protein-coding	7.7	12.78	4.64	0.63	3.29	1.46	1.04	-2.35566
chr3	193274570	193275070	Intergenic	Intergenic	-1909	NM_032279	84239	Hs.674423	NM_032279	ENSG00000127249	ATP13A4	-	ATPase 13A4	protein-coding	1.47	1.78	1.19	11.55	8.51	9.52	5.55	2.65031
chr8	128053887	128054387	Intergenic	Intergenic	28738	NR_045262	100750225	Hs.571530	NR_045262	ENSG00000253438	PCAT1	PCA1|PCAT-1	prostate cancer associated transcript 1 (non-protein coding)	ncRNA	15.78	32.52	4.64	3.01	3.57	1.46	3.47	-2.42919
chr1	212314737	212315237	Intergenic	Intergenic	64032	NR_036068	100422947		NR_036068	ENSG00000264358	MIR3122	mir-3122	microRNA 3122	ncRNA	17.79	15.21	5.93	1.42	1.65	1.46	2.43	-3.10134
chr11	119562700	119563200	intron (NM_203286, intron 1 of 5)	intron (NM_203286, intron 1 of 5)	36485	NM_203286	5818	Hs.334846	NM_002855	ENSG00000110400	NECTIN1	CD111|CLPED1|ED4|HIgR|HV1S|HVEC|OFC7|PRR|PRR1|PVRL1|PVRR|PVRR1|SK-12|nectin-1	nectin cell adhesion molecule 1	protein-coding	20.54	30.9	8.49	3.32	3.02	4.03	3.12	-2.49266
chr1	152140204	152140704	Intergenic	Intergenic	-8750	NM_001122965	126638	Hs.376144	NM_152364	ENSG00000215853	RPTN	-	repetin	protein-coding	14.12	21.84	5.93	3.48	1.92	3.48	2.43	-2.50396
chr13	64306022	64306522	intron (NR_047011, intron 1 of 3)	intron (NR_047011, intron 1 of 3)	-5296	NR_002171	283491	Hs.363054	NR_002171		OR7E156P	-	olfactory receptor family 7 subfamily E member 156 pseudogene	pseudo	1.83	2.75	2.77	18.52	12.9	13.73	9.89	2.38449
chr6	122101474	122101974	Intergenic	MLT1G1|LTR|ERVL-MaLR	345001	NM_000165	2697	Hs.74471	NM_000165	ENSG00000152661	GJA1	AVSD3|CMDR|CX43|EKVP|GJAL|HLHS1|HSS|ODDD|PPKCA	gap junction protein alpha 1	protein-coding	17.06	41.74	11.75	3.32	2.47	1.83	2.78	-3.03916
chr12	52335313	52335813	Intergenic	Intergenic	-9888	NM_004302	91	Hs.438918	NM_004302	ENSG00000135503	ACVR1B	ACTRIB|ACVRLK4|ALK4|SKR2	activin A receptor type 1B	protein-coding	13.57	20.55	6.42	1.58	3.29	2.01	1.21	-2.64239
chr13	80015644	80016144	Intergenic	LTR22A|LTR|ERVK	35450	NR_038991	100505538	Hs.600720	NR_038991	ENSG00000227354	RBM26-AS1	-	RBM26 antisense RNA 1	ncRNA	1.83	1.62	2.77	6.96	16.74	11.72	11.62	2.41952
chr10	95766818	95767318	intron (NM_016341, intron 1 of 32)	intron (NM_016341, intron 1 of 32)	13322	NM_001288989	51196	Hs.655033	NM_016341	ENSG00000138193	PLCE1	NPHS3|PLCE|PPLC	phospholipase C epsilon 1	protein-coding	1.47	1.46	1.58	6.33	12.62	8.61	7.81	2.55872
chr12	73777592	73778092	Intergenic	Intergenic	224872	NR_110130	101928137	Hs.694666	NR_110130	ENSG00000258123	LOC101928137	-	uncharacterized LOC101928137	ncRNA	1.28	0.65	1.38	18.04	18.66	8.61	11.45	3.30632
chr4	122607396	122607896	intron (NM_001154, intron 2 of 12)	intron (NM_001154, intron 2 of 12)	10501	NM_001154	308	Hs.480653	NM_001154	ENSG00000164111	ANXA5	ANX5|ENX2|HEL-S-7|PP4|RPRGL3	annexin A5	protein-coding	2.57	1.46	1.28	14.72	9.06	8.42	15.09	2.75532
chr2	53858390	53858890	Intergenic	Intergenic	-136280	NM_001346127	494143	Hs.585944	NM_001008708	ENSG00000143942	CHAC2	-	ChaC cation transport regulator homolog 2	protein-coding	2.57	1.29	1.58	22	13.17	8.61	26.02	3.176
chr3	35873491	35873991	Intergenic	Intergenic	87773	NR_029824	406916		NR_029824	ENSG00000207625	MIR128-2	MIR128B|MIRN128-2|MIRN128B|mir-128-2|mir-128b	microRNA 128-2	ncRNA	2.38	1.46	2.77	12.82	12.9	9.7	9.89	2.34676
chr2	196204907	196205407	Intergenic	L3|LINE|CR1	-316375	NM_001127257	57181	Hs.650158	NM_020342	ENSG00000196950	SLC39A10	LZT-Hs2	solute carrier family 39 member 10	protein-coding	1.28	0.65	2.07	11.71	8.51	7.87	14.23	2.89555
chr5	14702198	14702698	Intergenic	L2|LINE|L2	-10355	NR_046285	100130744	Hs.660550	NR_046285		LOC100130744	-	uncharacterized LOC100130744	ncRNA	20.54	21.68	7.41	2.37	2.47	2.01	2.43	-2.74964
chr9	110897000	110897500	Intergenic	Intergenic	-645249	NM_004235	9314	Hs.376206	NM_004235	ENSG00000136826	KLF4	EZF|GKLF	Kruppel like factor 4	protein-coding	1.1	1.62	1.48	14.88	11.25	7.51	9.89	3.05911
chr21	37359780	37360280	intron (NR_110418, intron 2 of 5)	intron (NR_110418, intron 2 of 5)	16935	NR_110418	101928269	Hs.589909	NR_110418		LOC101928269	-	uncharacterized LOC101928269	ncRNA	2.38	3.4	2.27	13.45	10.43	8.24	27.07	2.42418
chr2	128953903	128954403	TTS (NR_027671)	TTS (NR_027671)	105371	NR_027671	56886	Hs.743306	NM_020120	ENSG00000136731	UGGT1	HUGT1|UGCGL1|UGT1	UDP-glucose glycoprotein glucosyltransferase 1	protein-coding	1.65	3.56	2.77	11.87	21.13	7.87	12.14	2.32769
chr18	43409039	43409704	intron (NM_213602, intron 1 of 5)	intron (NM_213602, intron 1 of 5)	3827	NM_213602	284266	Hs.287692	NM_213602	ENSG00000197046	SIGLEC15	CD33L3|HsT1361|SIGLEC-15	sialic acid binding Ig like lectin 15	protein-coding	6.6	12.13	5.83	48.12	35.68	32.04	37.82	2.42986
chr14	30218551	30219051	intron (NM_001330069, intron 1 of 18)	intron (NM_001330069, intron 1 of 18)	178098	NM_002742	5587	Hs.508999	NM_002742	ENSG00000184304	PRKD1	PKC-MU|PKCM|PKD|PRKCM	protein kinase D1	protein-coding	2.57	2.43	2.86	18.99	20.58	15.2	19.43	2.79016
chr12	96131848	96132348	intron (NM_001329702, intron 2 of 9)	intron (NM_001329702, intron 2 of 9)	51875	NM_001329702	59277	Hs.201034	NM_021229	ENSG00000074527	NTN4	PRO3091	netrin 4	protein-coding	0.92	3.88	4.64	31.97	16.47	13.92	21.86	2.75153
chr8	120931937	120932437	intron (NM_001283012, intron 1 of 6)	intron (NM_001283012, intron 1 of 6)	46292	NM_022783	64798	Hs.112981	NM_022783	ENSG00000155792	DEPTOR	DEP.6|DEPDC6	DEP domain containing MTOR interacting protein	protein-coding	2.38	2.27	1.48	15.2	7.96	8.97	12.67	2.77354
chr12	28210701	28211201	Intergenic	Intergenic	-86035	NM_198965	5744	Hs.591159	NM_002820	ENSG00000087494	PTHLH	BDE2|HHM|PLP|PTHR|PTHRP	parathyroid hormone like hormone	protein-coding	14.31	29.77	6.81	1.42	1.37	2.56	2.26	-3.26387
chr22	40783674	40784174	intron (NM_015705, intron 1 of 21)	intron (NM_015705, intron 1 of 21)	17358	NM_001301849	27352	Hs.474914	NM_015705	ENSG00000100359	SGSM3	CIP85|MAP|RABGAP5|RUSC3|RUTBC3|RabGAP-5|rabGAPLP	small G protein signaling modulator 3	protein-coding	2.93	5.99	2.27	19.31	15.92	14.83	29.32	2.53598
chr15	32992650	32993150	Intergenic	MER57B2|LTR|ERV1	-17305	NM_001191322	26585	Hs.40098	NM_013372	ENSG00000166923	GREM1	C15DUPq|CKTSF1B1|CRAC1|CRCS4|DAND2|DRM|DUP15q|GREMLIN|HMPS|HMPS1|IHG-2|MPSH|PIG2	gremlin 1, DAN family BMP antagonist	protein-coding	1.1	0.97	2.57	25.01	14	15.38	12.32	3.23497
chr13	73713058	73713558	Intergenic	Intergenic	80378	NM_001730	688	Hs.508234	NM_001730	ENSG00000102554	KLF5	BTEB2|CKLF|IKLF	Kruppel like factor 5	protein-coding	1.65	1.78	1.19	13.61	6.04	6.96	18.74	2.76662
chr14	31931588	31932088	Intergenic	AluJo|SINE|Alu	-5158	NM_080664	112487	Hs.116014	NM_080664	ENSG00000129480	DTD2	C14orf126	D-tyrosyl-tRNA deacylase 2 (putative)	protein-coding	6.42	14.88	2.86	0.95	0.82	0.55	2.26	-3.01863
chr4	10065255	10065755	Intergenic	Intergenic	14811	NR_036090	100423011		NR_036090	ENSG00000264931	MIR3138	mir-3138	microRNA 3138	ncRNA	9.91	32.52	9.58	4.75	1.1	2.01	4.68	-2.32592
chr5	169019873	169020373	intron (NM_001329640, intron 3 of 10)	intron (NM_001329640, intron 3 of 10)	9039	NM_001329640	54908	Hs.368710	NM_017785	ENSG00000040275	SPDL1	CCDC99	spindle apparatus coiled-coil protein 1	protein-coding	1.47	3.24	1.28	8.55	12.35	8.06	13.19	2.56479
chr6	78197772	78198272	Intergenic	Intergenic	-24283	NM_000863	3351	Hs.123016	NM_000863	ENSG00000135312	HTR1B	5-HT-1B|5-HT-1D-beta|5-HT1B|5-HT1DB|HTR1D2|HTR1DB|S12	5-hydroxytryptamine receptor 1B	protein-coding	0	0.16	1.58	19.15	18.11	10.62	21.51	4.74439
chr7	20343899	20344399	intron (NR_110117, intron 3 of 4)	MER67A|LTR|ERV1	7818	NR_110117	101927769	Hs.256080	NR_110117	ENSG00000226097	LOC101927769	-	uncharacterized LOC101927769	ncRNA	1.28	2.1	3.06	9.34	10.98	8.61	15.61	2.43289
chr3	82558180	82558680	Intergenic	MER52A|LTR|ERV1	-747480	NM_000158	2632	Hs.436062	NM_000158	ENSG00000114480	GBE1	APBD|GBE|GSD4	1,4-alpha-glucan branching enzyme 1	protein-coding	15.04	57.43	8.99	1.58	5.49	1.83	3.12	-2.92131
chr5	140098135	140098854	promoter-TSS (NR_026704)	promoter-TSS (NR_026704)	-16	NR_026704	56663		NR_026704	ENSG00000202111	VTRNA1-2	HVG2|VAULTRC2|VR2|hvg-2	vault RNA 1-2	ncRNA	5.69	6.31	5.33	17.89	17.84	26.37	30.54	2.83297
chr20	6671521	6672021	Intergenic	L2b|LINE|L2	-76974	NM_001200	650	Hs.73853	NM_001200	ENSG00000125845	BMP2	BDA2|BMP2A	bone morphogenetic protein 2	protein-coding	2.75	1.78	1.78	16.14	17.56	16.3	11.8	2.827
chr3	108851936	108852436	Intergenic	Intergenic	-3375	NR_033977	401081	Hs.280892	NR_033977	ENSG00000241224	FLJ22763	-	uncharacterized LOC401081	ncRNA	0	0.97	1.58	21.37	19.49	14.28	12.84	4.0408
chr4	22849910	22850410	Intergenic	Arthur1B|DNA|hAT-Tip100	134448	NM_001277225	57733	Hs.653107	NM_020973	ENSG00000249948	GBA3	CBG|CBGL1|GLUC|KLRP	glucosylceramidase beta 3 (gene/pseudogene)	protein-coding	0.73	1.13	1.19	9.02	11.25	6.23	6.25	3.07675
chr3	122037408	122037908	Intergenic	Intergenic	-6353	NM_005213	1475	Hs.518198	NM_005213	ENSG00000121552	CSTA	AREI|PSS4|STF1|STFA	cystatin A	protein-coding	12.66	27.99	3.95	0.79	1.1	3.3	3.82	-2.36637
chr14	100942654	100943154	intron (NM_024515, intron 3 of 6)	intron (NM_024515, intron 3 of 6)	91503	NM_001159531	57596	Hs.211751	NM_020836	ENSG00000183092	BEGAIN	-	brain enriched guanylate kinase associated	protein-coding	1.65	3.88	2.27	10.13	13.72	15.75	19.26	2.7447
chr4	163327730	163328569	Intergenic	Intergenic	-242964	NM_001128427	56884	Hs.32452	NM_020116	ENSG00000168843	FSTL5	-	follistatin like 5	protein-coding	3.85	4.85	3.26	18.52	21.96	16.11	22.38	3.24419
chr14	68008488	68008988	intron (NM_020715, intron 2 of 28)	intron (NM_020715, intron 2 of 28)	8730	NM_020715	57475	Hs.594236	NM_020715	ENSG00000054690	PLEKHH1	-	pleckstrin homology, MyTH4 and FERM domain containing H1	protein-coding	1.28	3.88	1.38	12.19	13.72	15.56	13.53	2.97938
chr5	130233114	130233960	Intergenic	L1PA3|LINE|L1	267504	NR_073488	3094	Hs.483305	NM_005340	ENSG00000169567	HINT1	HINT|NMAN|PKCI-1|PRKCNH1	histidine triad nucleotide binding protein 1	protein-coding	2.93	5.02	4.84	18.04	26.07	12.45	20.47	2.34686
chr1	102511274	102511774	Intergenic	MER50C|LTR|ERV1	-48734	NR_110211	118427	Hs.484475	NM_058170	ENSG00000118733	OLFM3	NOE3|NOELIN3|OPTIMEDIN	olfactomedin 3	protein-coding	1.65	1.29	1.98	20.89	22.23	16.3	9.54	3.59907
chr9	17057630	17058130	Intergenic	MIR|SINE|MIR	-77109	NM_001286985	54875	Hs.435381	NM_017738	ENSG00000044459	CNTLN	C9orf101|C9orf39|bA340N12.1	centlein	protein-coding	1.1	2.27	1.68	4.27	7.96	7.87	15.09	2.52391
chr18	36893863	36894363	intron (NR_024391, intron 3 of 3)	intron (NR_024391, intron 3 of 3)	308026	NR_030628	100126323		NR_030628	ENSG00000283615	MIR924	MIRN924|hsa-mir-924	microRNA 924	ncRNA	1.83	2.43	1.38	14.25	18.66	10.07	6.07	2.97862
chr2	201242385	201242885	intron (NM_001282743, intron 2 of 11)	intron (NM_001282743, intron 2 of 11)	68962	NM_001282744	26010	Hs.120323	NM_015535	ENSG00000196141	SPATS2L	DNAPTP6|SGNP	spermatogenesis associated serine rich 2 like	protein-coding	3.49	3.07	2.77	15.2	14	13.37	16.31	2.32574
chr8	125868911	125869411	Intergenic	Intergenic	-34861	NR_039809	100616255		NR_039809	ENSG00000263735	MIR4662B	-	microRNA 4662b	ncRNA	20.18	42.55	11.85	3.01	7.96	3.48	2.6	-2.44437
chr4	55379297	55379797	Intergenic	Intergenic	93751	NR_134657	339978		NR_134657	ENSG00000250456	LOC339978	-	uncharacterized LOC339978	ncRNA	9.72	28.15	6.42	4.27	0.82	2.56	3.82	-2.36898
chr4	89764437	89764937	intron (NM_014883, intron 7 of 23)	intron (NM_014883, intron 7 of 23)	-20175	NM_001265579	10144	Hs.97270	NM_014883	ENSG00000138640	FAM13A	ARHGAP48|FAM13A1	family with sequence similarity 13 member A	protein-coding	1.65	2.91	0.99	11.08	6.86	6.23	7.81	2.38824
chr10	14592254	14592754	intron (NM_031453, intron 2 of 4)	intron (NM_031453, intron 2 of 4)	-1835	NM_001320739	83641	Hs.446315	NM_031453	ENSG00000065809	FAM107B	C10orf45|HITS	family with sequence similarity 107 member B	protein-coding	2.38	1.62	3.56	11.4	15.64	14.46	21.86	2.47943
chr15	52542640	52543140	intron (NM_018728, intron 13 of 40)	intron (NM_018728, intron 13 of 40)	26507	NR_031670	100302202		NR_031670	ENSG00000221052	MIR1266	MIRN1266|hsa-mir-1266|mir-1266	microRNA 1266	ncRNA	2.38	2.1	4.05	20.89	18.39	20.32	27.59	2.70784
chr3	111329358	111329858	intron (NM_005816, intron 8 of 13)	intron (NM_005816, intron 8 of 13)	-15426	NM_024508	79413	Hs.136912	NM_024508	ENSG00000177494	ZBED2	-	zinc finger BED-type containing 2	protein-coding	25.31	29.93	8.79	2.06	3.29	2.56	2.6	-3.21852
chr10	85938745	85939427	intron (NM_207373, intron 2 of 2)	intron (NM_207373, intron 2 of 2)	5532	NM_207373	387695	Hs.298713	NM_207373	ENSG00000188373	C10orf99	AP-57|CSBF|UNQ1833	chromosome 10 open reading frame 99	protein-coding	41.64	98.37	14.81	5.22	4.94	5.49	6.94	-2.62376
chr3	76998596	76999096	Intergenic	Intergenic	-90448	NM_001290039	6092	Hs.13305	NM_002942	ENSG00000185008	ROBO2	SAX3	roundabout guidance receptor 2	protein-coding	2.2	1.46	1.58	13.3	12.08	7.87	15.44	2.70288
chr16	48284798	48285298	intron (NM_031490, intron 1 of 14)	intron (NM_031490, intron 1 of 14)	6970	NM_001300948	83752	Hs.295923	NM_031490	ENSG00000102910	LONP2	LONP|LONPL|PLON|PSLON	lon peptidase 2, peroxisomal	protein-coding	1.83	1.62	0.49	7.44	8.78	9.89	6.77	2.74558
chr4	93155556	93156056	Intergenic	L1ME5|LINE|L1	42647	NR_125920	101929194	Hs.626389	NR_125920		LNCPRESS2	-	lncRNA p53 regulated and ESC associated 2	ncRNA	2.75	3.24	0.79	11.87	8.51	6.59	8.33	2.38328
chr4	22943586	22944086	Intergenic	LTR79|LTR|ERVL	228124	NM_001277225	57733	Hs.653107	NM_020973	ENSG00000249948	GBA3	CBG|CBGL1|GLUC|KLRP	glucosylceramidase beta 3 (gene/pseudogene)	protein-coding	2.38	2.43	2.27	21.05	10.15	7.14	10.41	2.54433
chr7	112410045	112410545	intron (NR_109840, intron 3 of 3)	intron (NR_109840, intron 3 of 3)	20183	NM_022484	64418	Hs.606345	NM_022484	ENSG00000146802	TMEM168	-	transmembrane protein 168	protein-coding	5.87	12.46	5.53	1.27	1.1	1.46	0.52	-3.08086
chr11	11738861	11739361	Intergenic	Intergenic	-60842	NR_036184	100423026		NR_036184	ENSG00000266645	MIR4299	-	microRNA 4299	ncRNA	6.05	19.09	4.05	1.42	1.92	1.46	2.08	-2.64126
chr13	103733706	103734206	Intergenic	Intergenic	-14760	NM_000452	6555	Hs.194783	NM_000452	ENSG00000125255	SLC10A2	ASBT|IBAT|ISBT|NTCP2|PBAM	solute carrier family 10 member 2	protein-coding	1.65	1.62	1.88	13.45	15.09	9.89	13.19	2.99301
chr2	197379758	197380258	intron (NM_020760, intron 1 of 28)	MER52A|LTR|ERV1	77327	NM_020760	57520	Hs.654742	NM_020760	ENSG00000138411	HECW2	NEDL2	HECT, C2 and WW domain containing E3 ubiquitin protein ligase 2	protein-coding	13.94	16.99	10.77	4.59	1.65	3.11	2.26	-2.40439
chr7	66437197	66437697	Intergenic	Intergenic	23141	NM_016038	51119	Hs.110445	NM_016038	ENSG00000126524	SBDS	CGI-97|SDS|SWDS	SBDS ribosome assembly guanine nucleotide exchange factor	protein-coding	2.2	1.62	1.88	16.78	9.33	9.15	19.78	3.09316
chr13	20820829	20821329	Intergenic	Intergenic	-14545	NM_001110219	10804	Hs.511757	NM_006783	ENSG00000121742	GJB6	CX30|DFNA3|DFNA3B|DFNB1B|ECTD2|ED2|EDH|HED|HED2	gap junction protein beta 6	protein-coding	4.4	20.71	6.62	2.53	1.65	1.46	1.91	-2.51654
chr7	122383248	122383748	intron (NM_001009571, intron 1 of 27)	intron (NM_001009571, intron 1 of 27)	-40477	NM_198085	378925	Hs.675191	NM_198085	ENSG00000235631	RNF148	-	ring finger protein 148	protein-coding	9.91	8.25	3.65	1.42	1.1	1.1	1.56	-3.03789
chr4	142600004	142600504	intron (NR_037840, intron 2 of 7)	intron (NR_037840, intron 2 of 7)	42505	NM_000585	3600	Hs.168132	NM_000585	ENSG00000164136	IL15	IL-15	interleukin 15	protein-coding	3.67	0.97	1.98	22.79	22.5	16.48	19.61	2.87812
chr4	17773021	17773521	intron (NM_015688, intron 1 of 17)	intron (NM_015688, intron 1 of 17)	9864	NM_015688	27146	Hs.744951	NM_015688	ENSG00000047662	FAM184B	-	family with sequence similarity 184 member B	protein-coding	13.21	18.28	7.21	2.69	2.47	2.38	2.43	-2.53349
chr3	101573535	101574035	intron (NM_001005474, intron 7 of 12)	intron (NM_001005474, intron 7 of 12)	5427	NM_031419	64332	Hs.319171	NM_031419	ENSG00000144802	NFKBIZ	IKBZ|INAP|MAIL	NFKB inhibitor zeta	protein-coding	4.04	4.53	2.17	20.26	15.92	8.42	13.01	2.43205
chr4	42462016	42462516	intron (NM_006095, intron 27 of 36)	intron (NM_006095, intron 27 of 36)	62410	NM_001080505	152573	Hs.370904	NM_001080505	ENSG00000178343	SHISA3	hShisa3	shisa family member 3	protein-coding	2.02	1.78	2.07	11.71	15.09	7.14	7.63	2.61103
chr1	240444039	240444539	intron (NM_001305424, intron 8 of 18)	intron (NM_001305424, intron 8 of 18)	189104	NM_020066	56776	Hs.24889	NM_020066	ENSG00000155816	FMN2	-	formin 2	protein-coding	1.1	1.29	2.17	14.25	9.06	5.68	7.81	2.35494
chr8	62646911	62647411	Intergenic	Intergenic	19814	NR_039680	100616484		NR_039680	ENSG00000264408	MIR4470	mir-4470	microRNA 4470	ncRNA	2.57	1.78	0.69	12.82	8.23	6.04	11.8	2.76279
chr2	188649842	188650342	Intergenic	L2a|LINE|L2	-230860	NM_006287	7035	Hs.516578	NM_006287	ENSG00000003436	TFPI	EPI|LACI|TFI|TFPI1	tissue factor pathway inhibitor	protein-coding	0.92	0.49	1.28	19.63	9.06	10.99	12.32	3.66217
chr6	71216796	71217296	intron (NM_001331004, intron 12 of 20)	intron (NM_001331004, intron 12 of 20)	-59579	NM_145267	135154	Hs.418495	NM_145267	ENSG00000154079	SDHAF4	C6orf57|Sdh8	succinate dehydrogenase complex assembly factor 4	protein-coding	1.1	1.13	1.19	8.23	12.35	8.42	9.02	3.20909
chr14	51422041	51422915	Intergenic	LTR88b|LTR|Gypsy?	-11230	NM_002863	5836	Hs.282417	NM_002863	ENSG00000100504	PYGL	GSD6	glycogen phosphorylase L	protein-coding	31.92	39.64	13.04	4.91	9.33	8.61	5.2	-3.04767
chr16	79919142	79919642	Intergenic	Intergenic	90246	NR_104661	101928248	Hs.659802	NR_104660	ENSG00000260876	LINC01229	-	long intergenic non-protein coding RNA 1229	ncRNA	7.52	15.69	4.84	1.58	2.2	1.46	1.21	-2.77448
chr10	71135084	71135948	intron (NM_001322365, intron 12 of 22)	intron (NM_001322365, intron 12 of 22)	41158	NM_001057	6865	Hs.88372	NM_001057	ENSG00000075073	TACR2	NK2R|NKNAR|SKR|TAC2R	tachykinin receptor 2	protein-coding	29.53	77.66	13.63	7.6	4.94	3.48	8.5	-2.53959
chr5	102641484	102641984	Intergenic	Intergenic	46676	NM_001316968	90355	Hs.482976	NM_033211	ENSG00000181751	C5orf30	-	chromosome 5 open reading frame 30	protein-coding	2.02	1.13	3.06	13.93	11.53	11.9	15.61	2.41565
chr14	84932070	84932570	Intergenic	Intergenic	-921299	NR_135155	105370605		NR_135155	ENSG00000258814	LOC105370605	-	uncharacterized LOC105370605	ncRNA	0.55	0.97	2.27	17.89	5.49	18.49	26.72	3.59724
chr6	75244144	75244644	intron (NR_110856, intron 2 of 3)	intron (NR_110856, intron 2 of 3)	465227	NR_110856	101928516	Hs.384600	NR_110856	ENSG00000223786	LOC101928516	-	uncharacterized LOC101928516	ncRNA	1.1	0	2.07	14.56	13.72	8.79	8.33	2.73483
chr17	52984647	52985147	intron (NM_001321176, intron 4 of 16)	intron (NM_001321176, intron 4 of 16)	6845	NM_001321173	10040	Hs.153504	NM_005486	ENSG00000141198	TOM1L1	SRCASM	target of myb1 like 1 membrane trafficking protein	protein-coding	1.65	1.78	0.79	11.24	11.53	6.77	6.94	2.95379
chr2	223923897	223924397	Intergenic	Intergenic	7499	NM_080671	23704	Hs.348522	NM_080671	ENSG00000152049	KCNE4	MIRP3	potassium voltage-gated channel subfamily E regulatory subunit 4	protein-coding	1.47	2.59	2.17	12.03	9.33	5.31	15.96	2.48418
chr4	114562158	114562658	intron (NM_001321576, intron 3 of 17)	MIRb|SINE|MIR	120675	NM_172127	817	Hs.144114	NM_001221	ENSG00000145349	CAMK2D	CAMKD	calcium/calmodulin dependent protein kinase II delta	protein-coding	0.37	1.13	1.88	16.62	11.8	5.86	10.76	3.23126
chr8	53886033	53886767	Intergenic	MLT2B3|LTR|ERVL	33932	NM_005285	2831	Hs.248117	NM_005285	ENSG00000183729	NPBWR1	GPR7	neuropeptides B and W receptor 1	protein-coding	5.32	2.27	3.85	22.16	18.39	26	16.83	3.12418
chr11	36521922	36522422	intron (NM_004620, intron 2 of 6)	L2a|LINE|L2	9691	NM_145803	7189	Hs.444172	NM_004620	ENSG00000175104	TRAF6	MGC:3310|RNF85	TNF receptor associated factor 6	protein-coding	1.83	2.91	2.67	7.28	6.86	12.45	14.4	2.34919
chr4	154140042	154140542	intron (NM_001302693, intron 1 of 2)	intron (NM_001302693, intron 1 of 2)	14726	NM_015271	23321	Hs.435711	NM_015271	ENSG00000109654	TRIM2	CMT2R|RNF86	tripartite motif containing 2	protein-coding	1.83	3.4	1.19	18.99	18.94	18.49	17.52	3.30169
chr7	83651895	83652395	intron (NM_006080, intron 6 of 16)	intron (NM_006080, intron 6 of 16)	172072	NM_006080	10371	Hs.252451	NM_006080	ENSG00000075213	SEMA3A	COLL1|HH16|Hsema-I|Hsema-III|SEMA1|SEMAD|SEMAIII|SEMAL|SemD|coll-1	semaphorin 3A	protein-coding	2.2	1.94	0.89	9.18	14.55	5.31	7.11	2.36714
chr17	41546402	41546902	Intergenic	Intergenic	-14581	NM_001322219	1659	Hs.463105	NM_004941	ENSG00000067596	DHX8	DDX8|HRH1|PRP22|PRPF22	DEAH-box helicase 8	protein-coding	14.31	24.11	4.74	2.53	2.47	1.65	1.56	-2.84733
chr12	39986189	39986689	intron (NM_005164, intron 6 of 9)	intron (NM_005164, intron 6 of 9)	27404	NM_005164	225	Hs.117852	NM_005164	ENSG00000173208	ABCD2	ABC39|ALDL1|ALDR|ALDRP|hALDR	ATP binding cassette subfamily D member 2	protein-coding	1.1	0.81	1.58	12.5	8.51	5.68	13.36	3.02479
chr5	67675420	67675920	Intergenic	Intergenic	87274	NM_001242466	5295	Hs.132225	NM_181504	ENSG00000145675	PIK3R1	AGM7|GRB1|IMD36|p85|p85-ALPHA	phosphoinositide-3-kinase regulatory subunit 1	protein-coding	10.09	15.69	4.84	2.22	1.65	1.65	1.91	-2.37909
chr13	38576728	38577228	Intergenic	Intergenic	-133039	NM_001135958	7223	Hs.262960	NM_003306	ENSG00000133107	TRPC4	HTRP-4|HTRP4|TRP4	transient receptor potential cation channel subfamily C member 4	protein-coding	1.47	2.1	1.58	16.14	7.14	7.69	10.06	2.56967
chr17	1673356	1673856	intron (NM_001329903, intron 3 of 7)	intron (NM_001329903, intron 3 of 7)	-1359	NM_001329905	5176	Hs.532768	NM_002615	ENSG00000132386	SERPINF1	EPC-1|OI12|OI6|PEDF|PIG35	serpin family F member 1	protein-coding	11.74	34.95	6.12	2.53	1.65	4.58	2.95	-2.4348
chr4	102806718	102807218	intron (NM_001127507, intron 4 of 15)	Tigger3a|DNA|TcMar-Tigger	71985	NM_001083907	55024	Hs.480400	NM_017935	ENSG00000153064	BANK1	BANK	B-cell scaffold protein with ankyrin repeats 1	protein-coding	0.73	2.1	1.98	21.05	12.62	10.44	11.97	3.175
chr8	60307234	60307734	Intergenic	Tigger3c|DNA|TcMar-Tigger	-275717	NM_014729	9760	Hs.491805	NM_014729	ENSG00000198846	TOX	TOX1	thymocyte selection associated high mobility group box	protein-coding	2.2	1.46	2.17	32.92	11.25	19.04	30.36	3.66164
chr2	144466216	144466716	intron (NM_018460, intron 13 of 13)	intron (NM_018460, intron 13 of 13)	-228168	NR_110237	101928386	Hs.668251	NR_110237	ENSG00000232377	LOC101928386	-	uncharacterized LOC101928386	ncRNA	1.47	0.97	1.28	20.58	6.59	9.34	9.89	3.20271
chr3	40110132	40110632	intron (NM_001284425, intron 3 of 15)	intron (NM_001284425, intron 3 of 15)	-31120	NM_001284426	25924	Hs.594535	NM_015460	ENSG00000170011	MYRIP	SLAC2-C|SLAC2C	myosin VIIA and Rab interacting protein	protein-coding	11.92	27.02	5.73	3.32	2.2	2.01	2.78	-2.52967
chr2	2743035	2743535	Intergenic	Intergenic	386513	NR_110228	101927554	Hs.638446	NR_110228	ENSG00000234423	LINC01250	-	long intergenic non-protein coding RNA 1250	ncRNA	13.76	21.36	9.78	4.75	2.74	2.38	3.12	-2.40442
chr14	79668149	79668649	TTS (NR_135159)	TTS (NR_135159)	2074	NR_135159	105370586		NR_135159	ENSG00000258419	LOC105370586	-	uncharacterized LOC105370586	ncRNA	0.92	0.81	2.07	8.23	10.43	10.62	4.86	2.62171
chrX	120524080	120524580	Intergenic	Intergenic	19504	NR_037444	100500869		NR_037444	ENSG00000265456	MIR3672	-	microRNA 3672	ncRNA	1.28	0.81	1.38	11.87	4.39	5.68	7.81	2.56083
chr5	107753831	107754331	Intergenic	LTR27B|LTR|ERV1	-36282	NM_001163315	64839	Hs.657225	NM_022824	ENSG00000145743	FBXL17	FBXO13|Fbl17|Fbx13	F-box and leucine rich repeat protein 17	protein-coding	6.6	29.28	7.8	4.91	2.2	2.2	0.52	-2.63238
chr2	209165879	209166379	intron (NM_001178000, intron 9 of 11)	intron (NM_001178000, intron 9 of 11)	35138	NM_015040	200576	Hs.744997	NM_015040	ENSG00000115020	PIKFYVE	CFD|FAB1|HEL37|PIP5K|PIP5K3|ZFYVE29	phosphoinositide kinase, FYVE-type zinc finger containing	protein-coding	10.09	8.74	2.77	1.74	1.37	0.55	1.04	-2.76213
chr14	59164854	59165354	Intergenic	Intergenic	59549	NR_046095	51339	Hs.48950	NM_016651	ENSG00000165617	DACT1	DAPPER|DAPPER1|DPR1|FRODO|HDPR1|THYEX3	dishevelled binding antagonist of beta catenin 1	protein-coding	1.65	0.97	1.58	7.44	6.31	7.87	10.41	2.64959
chr3	111761701	111762201	intron (NM_001042575, intron 2 of 15)	Tigger3a|DNA|TcMar-Tigger	3486	NR_026734	344805	Hs.435490	NM_001042575	ENSG00000176040	TMPRSS7	-	transmembrane protease, serine 7	protein-coding	2.02	11.49	1.98	27.7	10.15	11.35	25.33	2.3439
chr2	241172255	241173419	Intergenic	C-rich|Low_complexity|Low_complexity	-92764	NM_148961	150677	Hs.148586	NM_148961	ENSG00000178602	OTOS	OTOSP	otospiralin	protein-coding	79.24	118.43	18.47	17.41	25.52	13.73	16.31	-2.39328
chr4	97570673	97571173	Intergenic	Intergenic	-717154	NR_102713	101410545	Hs.628520	NR_102713	ENSG00000251620	STPG2-AS1	-	STPG2 antisense RNA 1	ncRNA	0.92	0.32	1.58	9.66	6.31	8.24	6.25	2.69704
chr1	207478191	207478691	Intergenic	L2b|LINE|L2	-16376	NM_000574	1604	Hs.126517	NM_000574	ENSG00000196352	CD55	CR|CROM|DAF|TC	CD55 molecule (Cromer blood group)	protein-coding	3.67	3.4	1.09	7.6	13.45	18.31	23.94	2.6212
chr3	161129826	161130326	Intergenic	Intergenic	-14139	NR_102265	101243545	Hs.737526	NR_102265	ENSG00000240567	LINC02067	-	long intergenic non-protein coding RNA 2067	ncRNA	2.38	1.94	0.69	10.92	8.23	10.07	13.36	2.7745
chr1	165614978	165615631	intron (NM_004528, intron 1 of 5)	intron (NM_004528, intron 1 of 5)	15195	NM_004528	4259	Hs.191734	NM_004528	ENSG00000143198	MGST3	GST-III	microsomal glutathione S-transferase 3	protein-coding	3.12	4.53	2.77	34.98	38.42	22.16	33.48	4.07398
chr17	80793892	80794392	intron (NM_024702, intron 1 of 2)	intron (NM_024702, intron 1 of 2)	3789	NM_024702	79755	Hs.464391	NM_024702	ENSG00000141579	ZNF750	ZFP750	zinc finger protein 750	protein-coding	12.29	38.02	5.73	3.17	1.65	1.46	5.2	-2.47221
chrX	36037202	36037702	intron (NM_001304548, intron 22 of 63)	LTR22B|LTR|ERVK	99601	NM_001304548	286464	Hs.376425	NM_152632	ENSG00000165164	CFAP47	CHDC2|CXorf22|CXorf30|CXorf59	cilia and flagella associated protein 47	protein-coding	1.1	1.78	0.79	19.31	18.11	7.69	5.55	3.8054
chr15	42096515	42097015	intron (NR_049761, intron 3 of 29)	intron (NR_049761, intron 3 of 29)	-23518	NM_001114632	100137047	Hs.198161	NM_001114632	ENSG00000243789	JMJD7	-	jumonji domain containing 7	protein-coding	19.08	36.08	7.9	2.69	1.37	3.66	2.78	-3.10476
chr20	14966495	14967250	intron (NM_080676, intron 5 of 16)	intron (NM_080676, intron 5 of 16)	-56709	NR_037841	100379174	Hs.407533	NR_037841	ENSG00000235914	MACROD2-AS1	BA318C17.1|NCRNA00186	MACROD2 antisense RNA 1	ncRNA	3.3	3.72	3.46	22.79	24.15	17.76	30.19	2.53776
chr7	23799628	23800128	intron (NM_032944, intron 10 of 23)	intron (NM_032944, intron 10 of 23)	49933	NM_001260504	56164	Hs.309767	NM_031414	ENSG00000196335	STK31	SGK396|TDRD8	serine/threonine kinase 31	protein-coding	0.92	1.46	1.48	9.02	8.51	9.15	7.11	2.80613
chr10	45557243	45557743	Intergenic	Intergenic	-61135	NM_001039380	220979	Hs.707791	NM_001039380		C10orf25	-	chromosome 10 open reading frame 25	protein-coding	11.37	24.27	5.14	3.64	2.2	1.1	2.26	-2.7148
chr14	86998556	86999056	Intergenic	LTR16C|LTR|ERVL	-373316	NR_038445	283585	Hs.381998	NR_038445	ENSG00000258804	LINC01148	-	long intergenic non-protein coding RNA 1148	ncRNA	1.28	0.81	1.58	12.66	13.17	6.23	8.67	2.98505
chr3	56110652	56111359	intron (NM_015576, intron 7 of 16)	intron (NM_015576, intron 7 of 16)	-224384	NR_037502	100500875		NR_037502	ENSG00000264013	MIR3938	-	microRNA 3938	ncRNA	17.98	29.28	6.42	3.48	4.39	3.48	3.12	-2.45051
chr5	160314773	160315273	Intergenic	L2a|LINE|L2	-35804	NM_025153	23120	Hs.109358	NM_025153	ENSG00000118322	ATP10B	ATPVB	ATPase phospholipid transporting 10B (putative)	protein-coding	0.92	2.43	2.07	24.22	13.72	14.46	15.44	3.39936
chr4	62421435	62421935	intron (NM_001322402, intron 4 of 25)	MER41A|LTR|ERV1	354711	NM_015236	23284	Hs.28391	NM_015236	ENSG00000150471	ADGRL3	CIRL3|CL3|LEC3|LPHN3	adhesion G protein-coupled receptor L3	protein-coding	4.4	1.13	1.09	13.14	12.9	9.15	17.87	2.41844
chr1	234724798	234725558	Intergenic	Intergenic	20093	NM_182972	359948	Hs.350268	NM_182972	ENSG00000168264	IRF2BP2	-	interferon regulatory factor 2 binding protein 2	protein-coding	19.63	41.09	12.25	5.22	4.39	3.3	5.9	-3.12419
chr6	73497213	73497713	intron (NM_001160133, intron 1 of 14)	intron (NM_001160133, intron 1 of 14)	157240	NR_120503	100507381	Hs.662412	NR_120503	ENSG00000233844	KCNQ5-IT1	-	KCNQ5 intronic transcript 1	ncRNA	17.61	37.7	5.53	3.8	0.82	3.11	2.43	-2.88637
chr4	176812933	176813433	intron (NR_048571, intron 1 of 5)	intron (NR_048571, intron 1 of 5)	-78918	NM_201591	2823	Hs.75819	NM_005277	ENSG00000150625	GPM6A	GPM6|M6A	glycoprotein M6A	protein-coding	0.55	1.46	2.07	8.86	7.96	8.79	5.38	2.57147
chr10	58077352	58077852	Intergenic	LTR27B|LTR|ERV1	43432	NM_007057	11130	Hs.591363	NM_007057	ENSG00000122952	ZWINT	HZwint-1|KNTC2AP|SIP30|ZWINT1	ZW10 interacting kinetochore protein	protein-coding	15.96	27.18	9.38	3.8	4.12	3.66	2.43	-2.38164
chr6	112013582	112014082	intron (NM_002037, intron 12 of 13)	intron (NM_002037, intron 12 of 13)	27433	NM_153047	2534	Hs.390567	NM_002037	ENSG00000010810	FYN	SLK|SYN|p59-FYN	FYN proto-oncogene, Src family tyrosine kinase	protein-coding	3.12	5.99	3.95	22.32	21.68	12.08	15.79	2.53176
chr9	71354640	71355140	intron (NM_001278253, intron 1 of 13)	intron (NM_001278253, intron 1 of 13)	34560	NM_003558	8395	Hs.534371	NM_003558	ENSG00000107242	PIP5K1B	MSS4|STM7	phosphatidylinositol-4-phosphate 5-kinase type 1 beta	protein-coding	3.3	5.82	4.15	35.61	20.58	27.1	29.32	2.76323
chr15	72495703	72496203	intron (NM_001206799, intron 8 of 10)	intron (NM_001206799, intron 8 of 10)	-5817	NM_001012642	196996	Hs.596332	NM_001012642	ENSG00000175318	GRAMD2	-	GRAM domain containing 2	protein-coding	10.09	37.05	8.99	4.91	2.74	2.75	3.3	-2.49414
chr6	80693918	80694547	Intergenic	Intergenic	-20089	NM_003318	7272	Hs.169840	NM_003318	ENSG00000112742	TTK	CT96|ESK|MPH1|MPS1|MPS1L1|PYT	TTK protein kinase	protein-coding	17.43	21.84	8.89	4.43	3.57	5.13	1.39	-2.60294
chr8	37818298	37818798	Intergenic	MIRc|SINE|MIR	5636	NM_000025	155	Hs.2549	NM_000025	ENSG00000188778	ADRB3	BETA3AR	adrenoceptor beta 3	protein-coding	2.02	2.75	2.77	9.66	10.43	13	14.92	2.56165
chr16	75712063	75712563	Intergenic	MER49|LTR|ERV1	30678	NR_144545	54386	Hs.301419	NM_018975	ENSG00000166848	TERF2IP	DRIP5|RAP1	TERF2 interacting protein	protein-coding	1.1	0.49	1.68	11.08	9.33	3.11	6.07	2.94815
chr20	14966495	14967250	intron (NM_080676, intron 5 of 16)	intron (NM_080676, intron 5 of 16)	-56709	NR_037841	100379174	Hs.407533	NR_037841	ENSG00000235914	MACROD2-AS1	BA318C17.1|NCRNA00186	MACROD2 antisense RNA 1	ncRNA	3.3	3.72	3.46	22.79	24.43	17.76	30.19	2.86214
chr1	67603046	67603546	Intergenic	MER77B|LTR|ERVL	-2642	NR_075077	400757	Hs.666621	NM_001013674	ENSG00000203963	C1orf141	-	chromosome 1 open reading frame 141	protein-coding	2.38	3.56	2.37	15.67	15.37	11.35	16.31	2.35917
chr4	111751557	111752057	Intergenic	Intergenic	-188528	NM_001204398	5308	Hs.643588	NM_000325	ENSG00000164093	PITX2	ARP1|Brx1|IDG2|IGDS|IGDS2|IHG2|IRID2|Otlx2|PTX2|RGS|RIEG|RIEG1|RS	paired like homeodomain 2	protein-coding	1.47	0.65	1.38	11.24	6.04	7.87	10.41	2.81181
chr1	88318003	88318503	Intergenic	Intergenic	-480915	NR_038324	100505768	Hs.125247	NR_038324	ENSG00000227290	LINC01364	-	long intergenic non-protein coding RNA 1364	ncRNA	0.55	1.46	2.07	11.08	12.08	9.15	11.1	3.40632
chr16	23290907	23291407	Intergenic	Intergenic	-22434	NM_000336	6338	Hs.414614	NM_000336	ENSG00000168447	SCNN1B	BESC1|ENaCb|ENaCbeta|SCNEB	sodium channel epithelial 1 beta subunit	protein-coding	19.81	25.4	5.73	5.38	2.47	2.2	2.6	-2.56386
chr7	55613121	55613621	intron (NM_030796, intron 1 of 4)	intron (NM_030796, intron 1 of 4)	-7011	NM_001284283	81552	Hs.488307	NM_030796	ENSG00000154978	VOPP1	ECOP|GASP	vesicular, overexpressed in cancer, prosurvival protein 1	protein-coding	22.01	38.83	7.21	2.22	1.37	6.23	5.2	-2.42896
chr1	220292399	220292899	intron (NM_018060, intron 12 of 22)	intron (NM_018060, intron 12 of 22)	-1066	NR_029711	406969		NR_029711	ENSG00000207624	MIR194-1	MIRN194-1|mir-194-1	microRNA 194-1	ncRNA	2.02	0.97	1.09	10.92	16.19	11.9	15.09	3.17044
chrX	28005875	28006375	Intergenic	LTR22A|LTR|ERVK	-6559	NM_001017930	139425	Hs.447365	NM_001017930	ENSG00000226372	DCAF8L1	WDR42B	DDB1 and CUL4 associated factor 8 like 1	protein-coding	2.02	2.27	2.96	17.41	23.88	11.54	25.33	2.95767
chr6	15949491	15949991	Intergenic	Intergenic	-179576	NM_013262	29116	Hs.484738	NM_013262	ENSG00000007944	MYLIP	IDOL|MIR	myosin regulatory light chain interacting protein	protein-coding	2.02	5.18	1.58	25.17	15.09	19.23	14.23	2.97749
chr4	81532434	81532934	intron (NM_001206997, intron 4 of 6)	intron (NM_001206997, intron 4 of 6)	275810	NM_152770	255119	Hs.527104	NM_152770	ENSG00000197826	C4orf22	-	chromosome 4 open reading frame 22	protein-coding	1.1	2.43	1.09	25.8	18.66	11.17	8.5	3.82751
chr20	11887205	11887705	intron (NM_001282550, intron 1 of 4)	intron (NM_001282550, intron 1 of 4)	-11058	NM_001282554	22903	Hs.709366	NM_014962	ENSG00000132640	BTBD3	dJ742J24.1	BTB domain containing 3	protein-coding	1.47	2.27	1.09	7.28	4.67	9.7	7.11	2.34236
chr4	163262492	163262992	Intergenic	Tigger3a|DNA|TcMar-Tigger	-177556	NM_001128427	56884	Hs.32452	NM_020116	ENSG00000168843	FSTL5	-	follistatin like 5	protein-coding	1.47	1.94	1.19	13.14	6.31	6.59	22.9	2.98484
chr1	33686627	33687127	Intergenic	Intergenic	-35297	NM_152493	149076	Hs.743358	NM_152493	ENSG00000160094	ZNF362	RN|lin-29	zinc finger protein 362	protein-coding	22.2	42.23	7.31	5.54	4.94	2.56	1.39	-2.64888
chr11	22174600	22175100	Intergenic	MER102c|DNA|hAT-Charlie	-39872	NM_213599	203859	Hs.154329	NM_213599	ENSG00000171714	ANO5	GDD1|LGMD2L|TMEM16E	anoctamin 5	protein-coding	1.28	3.4	1.68	13.3	13.17	8.24	9.02	2.44652
chr7	127570931	127571431	intron (NM_014390, intron 15 of 23)	Tigger1|DNA|TcMar-Tigger	-66381	NR_027330	27099	Hs.657377	NM_014411	ENSG00000279078	SND1-IT1	C7orf54|NAG8|NSG-X	SND1 intronic transcript 1	ncRNA	0.73	1.29	1.19	8.86	6.59	5.86	6.42	2.63923
chr9	92157525	92158025	Intergenic	Intergenic	-62152	NM_006705	10912	Hs.9701	NM_006705	ENSG00000130222	GADD45G	CR6|DDIT2|GADD45gamma|GRP17	growth arrest and DNA damage inducible gamma	protein-coding	11.74	21.84	8.1	4.12	2.2	2.93	3.47	-2.34207
chr18	72517912	72518412	intron (NM_001146189, intron 3 of 6)	intron (NM_001146189, intron 3 of 6)	175243	NM_001146189	55628	Hs.536490	NM_017757	ENSG00000215421	ZNF407	-	zinc finger protein 407	protein-coding	2.75	4.37	1.09	14.25	13.45	8.24	10.76	2.35834
chr12	84566794	84567294	Intergenic	MER52A|LTR|ERV1	739564	NM_018057	55117	Hs.44424	NM_018057	ENSG00000072041	SLC6A15	NTT73|SBAT1|V7-3|hv7-3	solute carrier family 6 member 15	protein-coding	13.94	17.47	11.85	2.53	5.76	1.65	1.21	-2.47016
chr1	227993321	227993821	Intergenic	L1MEg|LINE|L1	-9847	NM_183062	339501	Hs.97604	NM_183062	ENSG00000185888	PRSS38	MPN2	protease, serine 38	protein-coding	14.31	25.72	4.94	1.11	2.74	1.46	0.69	-3.3761
chr3	183687795	183688295	intron (NM_001320032, intron 11 of 29)	L2a|LINE|L2	-36081	NR_046570	100873982	Hs.570696	NR_046570	ENSG00000223882	ABCC5-AS1	-	ABCC5 antisense RNA 1	ncRNA	10.27	26.05	5.83	1.9	3.57	2.93	1.21	-2.45931
chr2	128212640	128213140	Intergenic	Intergenic	-31696	NR_039944	100616187		NR_039944	ENSG00000264075	MIR4783	-	microRNA 4783	ncRNA	2.93	1.78	1.68	15.51	15.37	10.44	12.84	2.56741
chr12	26209187	26209687	intron (NM_007211, intron 3 of 5)	intron (NM_007211, intron 3 of 5)	3946	NM_001164746	11228	Hs.696433	NM_007211	ENSG00000123094	RASSF8	C12orf2|HOJ1	Ras association domain family member 8	protein-coding	0.55	1.94	1.58	16.3	15.37	7.69	11.28	3.25351
chr2	152801662	152802162	intron (NM_001145798, intron 2 of 12)	AluJb|SINE|Alu	26654	NM_001330118	785	Hs.120725	NM_000726	ENSG00000182389	CACNB4	CAB4|CACNLB4|EA5|EIG9|EJM|EJM4|EJM6	calcium voltage-gated channel auxiliary subunit beta 4	protein-coding	14.12	18.93	6.02	2.85	1.65	3.3	0.52	-2.63511
chr13	32572219	32572719	Intergenic	Intergenic	-32968	NM_023037	10129	Hs.507669	NM_023037	ENSG00000073910	FRY	13CDNA73|214K23.2|C13orf14|CG003|bA207N4.2|bA37E23.1	FRY microtubule binding protein	protein-coding	1.1	1.46	2.37	11.24	12.35	6.77	7.98	2.68682
chr4	171226731	171227231	Intergenic	MIRb|SINE|MIR	79239	NR_125889	101928223	Hs.254617	NR_125889		LINC01612	-	long intergenic non-protein coding RNA 1612	ncRNA	1.65	1.62	1.38	7.28	15.92	7.14	12.49	2.58903
chr6	148584152	148584652	Intergenic	Intergenic	-9010	NM_001346505	23328	Hs.193133	NM_015278	ENSG00000111961	SASH1	SH3D6A|dJ323M4.1	SAM and SH3 domain containing 1	protein-coding	9.91	29.28	6.72	2.22	2.2	3.48	3.47	-2.52498
chr20	4850178	4850678	intron (NM_203327, intron 12 of 16)	intron (NM_203327, intron 12 of 16)	-46137	NM_014737	9770	Hs.631504	NM_014737	ENSG00000101265	RASSF2	CENP-34|RASFADIN	Ras association domain family member 2	protein-coding	2.93	2.59	1.68	6.81	5.21	13.73	16.14	2.32952
chr3	148319908	148320408	Intergenic	Intergenic	-95500	NM_009585	185	Hs.477887	NM_000685	ENSG00000144891	AGTR1	AG2S|AGTR1B|AT1|AT1AR|AT1B|AT1BR|AT1R|AT2R1|HAT1R	angiotensin II receptor type 1	protein-coding	0.18	1.94	2.47	8.86	17.84	5.31	5.2	2.5951
chr1	241355045	241355545	intron (NM_002924, intron 2 of 17)	L1MDa|LINE|L1	59723	NR_036069	100422856		NR_036069	ENSG00000265831	MIR3123	mir-3123	microRNA 3123	ncRNA	1.83	0.65	1.68	20.89	27.72	10.99	21.17	3.72149
chr18	40099947	40100447	intron (NR_046454, intron 6 of 6)	intron (NR_046454, intron 6 of 6)	333564	NR_046457	284260	Hs.652819	NR_046174	ENSG00000267586	LINC00907	-	long intergenic non-protein coding RNA 907	ncRNA	0.73	0	2.17	16.94	12.35	9.15	10.24	3.5171
chr2	31517031	31517531	Intergenic	Intergenic	60401	NM_014600	30845	Hs.368808	NM_014600	ENSG00000013016	EHD3	PAST3	EH domain containing 3	protein-coding	13.57	24.43	5.33	1.74	2.2	2.56	3.3	-2.68374
chr2	138829749	138830249	Intergenic	Intergenic	-29455	NR_135526	105373635		NR_135526	ENSG00000224231	LINC01832	-	long intergenic non-protein coding RNA 1832	ncRNA	24.95	60.67	10.07	2.37	4.12	4.03	1.04	-3.43043
chr4	189910456	189910956	Intergenic	Intergenic	533974	NR_033869	401164	Hs.435756	NR_033869	ENSG00000249378	LINC01060	-	long intergenic non-protein coding RNA 1060	ncRNA	2.93	2.59	0.89	19.79	11.53	10.44	19.78	2.73815
chr4	16142537	16143037	Intergenic	Intergenic	-57164	NM_001145848	8842	Hs.614734	NM_006017	ENSG00000007062	PROM1	AC133|CD133|CORD12|MCDR2|MSTP061|PROML1|RP41|STGD4	prominin 1	protein-coding	1.65	5.82	2.37	17.25	16.74	12.27	14.57	2.40533
chr3	137738519	137739019	intron (NM_016369, intron 1 of 4)	intron (NM_016369, intron 1 of 4)	9763	NM_016369	51208	Hs.655324	NM_016369	ENSG00000066405	CLDN18	SFTA5|SFTPJ	claudin 18	protein-coding	2.93	2.91	2.77	20.42	11.53	9.15	14.05	2.38821
chr6	115682036	115682536	Intergenic	MIR|SINE|MIR	282713	NR_134602	105377962	Hs.571066	NR_134602		LOC105377962	-	uncharacterized LOC105377962	ncRNA	0.92	0.65	2.57	12.19	6.59	9.89	12.84	2.55687
chr8	75306686	75307186	Intergenic	Intergenic	44318	NM_001040875	54332	Hs.168950	NM_018972	ENSG00000104381	GDAP1	CMT4|CMT4A|CMTRIA	ganglioside induced differentiation associated protein 1	protein-coding	4.04	3.56	2.57	25.33	19.21	11.54	17.18	2.49072
chr7	6055307	6055807	intron (NM_006303, intron 2 of 3)	intron (NM_006303, intron 2 of 3)	5201	NM_001326611	7965	Hs.301613	NM_006303	ENSG00000106305	AIMP2	JTV-1|JTV1|P38	aminoacyl tRNA synthetase complex interacting multifunctional protein 2	protein-coding	10.46	27.5	3.75	1.9	2.74	2.2	3.64	-2.43085
chr15	27694122	27694622	intron (NM_033223, intron 5 of 9)	intron (NM_033223, intron 5 of 9)	-287906	NR_120343	101928869	Hs.585699	NR_120343	ENSG00000228740	GABRG3-AS1	-	GABRG3 antisense RNA 1	ncRNA	13.76	20.39	5.23	2.85	2.74	1.65	4.68	-2.38157
chr5	76141595	76142095	Intergenic	Intergenic	-3981	NM_130772	170591	Hs.482563	NM_130772	ENSG00000171643	S100Z	Gm625|S100-zeta	S100 calcium binding protein Z	protein-coding	9.36	12.13	5.23	2.37	1.1	1.65	1.21	-2.62878
chr6	123377901	123378401	intron (NM_001010852, intron 5 of 5)	intron (NM_001010852, intron 5 of 5)	61035	NM_001010852	134829	Hs.486361	NM_001010852	ENSG00000146352	CLVS2	C6orf212|C6orf213|RLBP1L2|bA160A10.4	clavesin 2	protein-coding	1.47	0.97	2.27	13.77	24.97	15.2	16.31	3.34963
chr17	57921286	57921974	Intergenic	AluJb|SINE|Alu	3003	NR_029493	406991	Hs.444569	NR_029493	ENSG00000062716	MIR21	MIRN21|hsa-mir-21|miR-21|miRNA21	microRNA 21	ncRNA	7.52	8.9	4.94	22	21.96	35.16	46.15	2.53393
chr8	124674104	124674604	Intergenic	Intergenic	-9164	NM_001081675	340359	Hs.450252	NM_001081675	ENSG00000175946	KLHL38	C8ORFK36	kelch like family member 38	protein-coding	17.98	31.71	4.54	1.58	3.84	3.11	0.52	-3.08247
chr19	8554399	8554899	TTS (NM_001297418)	TTS (NM_001297418)	12889	NM_032152	84106	Hs.465812	NM_032152	ENSG00000133246	PRAM1	PML-RAR|PRAM-1	PML-RARA regulated adaptor molecule 1	protein-coding	21.28	46.59	6.22	4.91	4.12	2.2	2.78	-2.7551
chr3	40408304	40408804	Intergenic	Intergenic	-20093	NM_001291961	956	Hs.441145	NM_001248	ENSG00000168032	ENTPD3	CD39L3|HB6|NTPDase-3	ectonucleoside triphosphate diphosphohydrolase 3	protein-coding	9.91	11.33	4.54	1.27	0.82	1.46	0.69	-2.96924
chr8	123921692	123922192	intron (NM_014943, intron 2 of 3)	intron (NM_014943, intron 2 of 3)	128041	NM_014943	22882	Hs.377090	NM_014943	ENSG00000178764	ZHX2	AFR1|RAF	zinc fingers and homeoboxes 2	protein-coding	10.64	16.02	5.93	3.48	0.27	3.3	1.73	-2.35549
chr11	13182281	13182781	Intergenic	Intergenic	-116743	NM_001030273	406	Hs.65734	NM_001178	ENSG00000133794	ARNTL	BMAL1|BMAL1c|JAP3|MOP3|PASD3|TIC|bHLHe5	aryl hydrocarbon receptor nuclear translocator like	protein-coding	14.86	19.58	4.64	1.27	1.1	2.75	2.26	-2.82347
chr17	13086043	13086543	Intergenic	Intergenic	-164912	NM_001165962	60528	Hs.434232	NM_018127	ENSG00000006744	ELAC2	COXPD17|ELC2|HPC2	elaC ribonuclease Z 2	protein-coding	0.92	5.66	1.48	15.67	7.68	6.96	8.33	2.42803
chr4	69018118	69018618	Intergenic	Intergenic	-22781	NM_207407	389208	Hs.677557	NM_207407	ENSG00000198092	TMPRSS11F	-	transmembrane protease, serine 11F	protein-coding	11.19	11.65	3.26	1.11	1.1	1.1	1.39	-2.96796
chr5	40411287	40411787	Intergenic	Intergenic	-268495	NM_000958	5734	Hs.199248	NM_000958	ENSG00000171522	PTGER4	EP4|EP4R	prostaglandin E receptor 4	protein-coding	15.41	30.42	6.02	2.53	3.02	1.65	2.6	-2.77455
chr6	47137573	47138073	Intergenic	Intergenic	-127724	NM_153840	266977	Hs.733762	NM_025048	ENSG00000153292	ADGRF1	GPR110|KPG_012|PGR19|hGPCR36	adhesion G protein-coupled receptor F1	protein-coding	13.76	21.36	5.04	0.79	2.2	0.92	3.64	-2.65646
chr15	98546778	98547635	Intergenic	Intergenic	43274	NM_183376	91947	Hs.6093	NM_183376	ENSG00000140450	ARRDC4	-	arrestin domain containing 4	protein-coding	15.41	54.52	11.16	4.43	1.37	6.23	2.78	-3.09565
chr4	23063005	23063505	Intergenic	Intergenic	347543	NM_001277225	57733	Hs.653107	NM_020973	ENSG00000249948	GBA3	CBG|CBGL1|GLUC|KLRP	glucosylceramidase beta 3 (gene/pseudogene)	protein-coding	2.75	1.94	2.37	13.61	12.08	10.07	12.49	2.33805
chr3	129132490	129132990	intron (NM_207307, intron 4 of 8)	Charlie20a|DNA|hAT-Charlie	-14458	NR_003111	132241	Hs.477537	NR_003111	ENSG00000251474	RPL32P3	-	ribosomal protein L32 pseudogene 3	pseudo	2.57	2.27	2.17	8.71	7.41	11.9	18.74	2.42432
chr9	124160587	124161087	Intergenic	ERVL-E-int|LTR|ERVL	-28255	NM_198194	2040	Hs.253903	NM_004099	ENSG00000148175	STOM	BND7|EPB7|EPB72	stomatin	protein-coding	7.89	20.06	4.74	0.47	2.74	0.73	1.04	-3.03983
chr7	95932375	95932875	intron (NR_027662, intron 1 of 16)	intron (NR_027662, intron 1 of 16)	18834	NM_014251	10165	Hs.489190	NM_014251	ENSG00000004864	SLC25A13	ARALAR2|CITRIN|CTLN2	solute carrier family 25 member 13	protein-coding	2.02	2.91	2.27	21.53	12.9	11.17	20.3	2.8583
chr6	82324012	82324512	Intergenic	Intergenic	138166	NM_017633	55603	Hs.10784	NM_017633	ENSG00000112773	FAM46A	C6orf37|XTP11	family with sequence similarity 46 member A	protein-coding	0.73	1.29	1.38	9.66	12.9	5.49	5.55	2.6988
chr6	122081254	122081754	Intergenic	L1P3|LINE|L1	324781	NM_000165	2697	Hs.74471	NM_000165	ENSG00000152661	GJA1	AVSD3|CMDR|CX43|EKVP|GJAL|HLHS1|HSS|ODDD|PPKCA	gap junction protein alpha 1	protein-coding	9.91	17.15	4.05	1.27	2.47	2.56	1.73	-2.34938
chr7	112212622	112213122	Intergenic	Intergenic	-45248	NR_110160	100996249	Hs.561749	NR_110159		LOC100996249	-	uncharacterized LOC100996249	ncRNA	1.28	2.43	1.88	8.71	16.47	11.54	7.11	2.38375
chr2	118484756	118485256	Intergenic	Intergenic	-87249	NM_006773	8886	Hs.744922	NM_006773	ENSG00000088205	DDX18	MrDb	DEAD-box helicase 18	protein-coding	1.83	1.29	0.99	15.83	11.8	5.31	8.33	2.73126
chr11	130619063	130619563	Intergenic	Intergenic	76462	NM_001271983	283171	Hs.376151	NM_001271983		C11orf44	-	chromosome 11 open reading frame 44	protein-coding	1.47	1.13	1.19	16.62	13.45	6.23	12.84	3.37804
chr3	148318747	148319247	Intergenic	ERVL-E-int|LTR|ERVL	-96661	NM_009585	185	Hs.477887	NM_000685	ENSG00000144891	AGTR1	AG2S|AGTR1B|AT1|AT1AR|AT1B|AT1BR|AT1R|AT2R1|HAT1R	angiotensin II receptor type 1	protein-coding	1.28	2.1	2.96	10.29	15.09	9.7	13.53	2.48257
chr3	150018498	150018998	intron (NR_110186, intron 1 of 3)	intron (NR_110186, intron 1 of 3)	22786	NR_110186	101928022	Hs.555199	NR_110186		LINC01214	-	long intergenic non-protein coding RNA 1214	ncRNA	2.2	1.78	1.98	11.71	14.27	10.8	15.79	2.58373
chr12	103643241	103643741	intron (NR_103526, intron 10 of 10)	intron (NR_103526, intron 10 of 10)	97871	NR_126333	101929058	Hs.171310	NR_126333	ENSG00000257860	LOC101929058	-	uncharacterized LOC101929058	ncRNA	0.92	1.29	1.19	18.2	10.7	9.7	15.09	3.55078
chr4	95587034	95587534	3' UTR (NM_001256427, exon 15 of 15)	3' UTR (NM_001256427, exon 15 of 15)	91400	NR_121610	100507012	Hs.128612	NR_121610		BMPR1B-AS1	-	BMPR1B antisense RNA 1 (head to head)	ncRNA	1.1	1.13	1.09	4.43	8.51	16.66	13.53	3.65039
chr12	124716419	124716919	intron (NM_001204299, intron 3 of 4)	intron (NM_001204299, intron 3 of 4)	-57041	NM_181709	144347	Hs.432901	NM_181709	ENSG00000178882	RFLNA	CFM2|FAM101A	refilin A	protein-coding	2.2	5.18	2.67	16.94	8.51	15.56	16.14	2.4195
chr1	38978415	38978915	Intergenic	Intergenic	-298226	NR_038928	339442	Hs.434245	NR_038928	ENSG00000237290	LINC01343	-	long intergenic non-protein coding RNA 1343	ncRNA	11.01	16.5	8.1	1.58	2.74	4.03	1.21	-2.40939
chr3	100332775	100333275	intron (NM_032787, intron 1 of 15)	intron (NM_032787, intron 1 of 15)	4592	NM_032787	84873	Hs.334511	NM_032787	ENSG00000144820	ADGRG7	GPR128	adhesion G protein-coupled receptor G7	protein-coding	1.47	1.29	1.09	12.03	10.15	7.14	5.9	2.59791
chr6	127887179	127887679	Intergenic	Intergenic	-10890	NM_001010905	352999	Hs.226268	NM_001010905	ENSG00000184530	C6orf58	LEG1	chromosome 6 open reading frame 58	protein-coding	1.1	2.75	2.47	12.35	16.74	10.25	21.34	2.91618
chr8	77834650	77835150	Intergenic	MER91A|DNA|hAT-Tip100	44186	NR_130460	100422921		NR_130460	ENSG00000266712	MIR3149	-	microRNA 3149	ncRNA	0.37	0.65	2.17	11.87	6.59	5.68	15.44	2.89899
chr18	40224659	40225159	intron (NR_046174, intron 7 of 9)	MER89|LTR|ERV1	458276	NR_046457	284260	Hs.652819	NR_046174	ENSG00000267586	LINC00907	-	long intergenic non-protein coding RNA 907	ncRNA	1.47	0.65	2.27	24.85	11.25	9.15	18.22	3.26838
chr6	78202230	78202730	Intergenic	Intergenic	-28741	NM_000863	3351	Hs.123016	NM_000863	ENSG00000135312	HTR1B	5-HT-1B|5-HT-1D-beta|5-HT1B|5-HT1DB|HTR1D2|HTR1DB|S12	5-hydroxytryptamine receptor 1B	protein-coding	0.92	0.65	2.86	16.78	10.43	9.15	13.53	2.76851
chr1	88777561	88778061	Intergenic	Intergenic	-372016	NM_001320709	5586	Hs.440833	NM_006256	ENSG00000065243	PKN2	PAK2|PRK2|PRKCL2|PRO2042|Pak-2|STK7	protein kinase N2	protein-coding	1.28	1.13	1.98	16.3	8.51	9.52	13.19	3.40198
chr10	112617960	112618460	Intergenic	L2c|LINE|L2	12452	NR_026932	282997	Hs.599931	NR_026932		PDCD4-AS1	-	PDCD4 antisense RNA 1	ncRNA	1.65	1.94	1.68	19.94	15.64	13.92	9.72	3.13321
chr6	138254874	138255374	Intergenic	Intergenic	-65754	NR_049793	100130476	Hs.598050	NR_049793	ENSG00000237499	LOC100130476	-	uncharacterized LOC100130476	ncRNA	12.66	22.49	4.15	0.63	1.1	0.55	1.39	-3.7576
chr8	102075905	102076405	intron (NR_033962, intron 2 of 2)	intron (NR_033962, intron 2 of 2)	11873	NR_033962	441374	Hs.652045	NR_033962	ENSG00000248599	FLJ42969	-	uncharacterized LOC441374	ncRNA	13.39	33.49	6.52	2.22	1.37	4.39	3.47	-2.69143
chr7	123725183	123725683	Intergenic	Intergenic	-51910	NM_001136002	730130	Hs.450249	NM_001136002	ENSG00000234224	TMEM229A	-	transmembrane protein 229A	protein-coding	2.02	2.1	3.56	27.22	14.55	10.07	11.62	2.33389
chr9	19397871	19398371	Intergenic	Intergenic	-10804	NM_001010887	340485	Hs.41379	NM_001010887	ENSG00000177076	ACER2	ALKCDase2|ASAH3L	alkaline ceramidase 2	protein-coding	2.57	3.07	1.98	31.18	20.31	13.73	39.38	3.39481
chrX	30630452	30630952	Intergenic	Intergenic	-34669	NM_025159	80231	Hs.665009	NM_025159	ENSG00000120280	CXorf21	-	chromosome X open reading frame 21	protein-coding	2.93	2.91	1.28	11.24	12.62	7.87	13.19	2.37107
chr18	59402748	59403248	Intergenic	Intergenic	-12411	NR_103449	100996669	Hs.586981	NR_103449		LINC01544	-	long intergenic non-protein coding RNA 1544	ncRNA	2.02	1.62	1.98	16.14	22.5	11.54	7.81	2.78654
chr8	39918833	39919333	Intergenic	L1M2a1|LINE|L1	-91904	NM_020130	56892	Hs.591849	NM_020130	ENSG00000176907	C8orf4	TC-1|TC1	chromosome 8 open reading frame 4	protein-coding	6.97	12.78	7.6	27.7	46.93	51.63	45.63	2.50424
chr4	67606690	67607190	Intergenic	Intergenic	464398	NR_031673	100302177		NR_031673	ENSG00000221563	MIR1269A	MIR1269|MIRN1269|hsa-mir-1269|hsa-mir-1269a	microRNA 1269a	ncRNA	3.3	9.38	4.05	0.47	0.27	2.38	1.56	-2.33393
chr10	91697036	91697536	intron (NR_110655, intron 3 of 3)	L1PA5|LINE|L1	19844	NR_110655	101926924	Hs.500498	NR_110655	ENSG00000226159	LINC01375	-	long intergenic non-protein coding RNA 1375	ncRNA	14.86	37.05	5.83	4.43	4.39	2.38	2.08	-2.37163
chr4	169019309	169019809	intron (NM_007193, intron 1 of 11)	intron (NM_007193, intron 1 of 11)	5871	NM_007193	11199	Hs.188401	NM_007193	ENSG00000109511	ANXA10	ANX14	annexin A10	protein-coding	1.83	0.97	1.48	14.4	11.25	6.96	19.43	3.14491
chr14	80848171	80848671	intron (NR_038355, intron 4 of 8)	intron (NR_038355, intron 4 of 8)	-151024	NM_000793	1734	Hs.202354	NM_000793	ENSG00000211448	DIO2	5DII|D2|DIOII|SelY|TXDI2	iodothyronine deiodinase 2	protein-coding	8.8	14.88	7.6	0.63	3.29	2.56	2.26	-2.94432
chr13	20894967	20895467	Intergenic	Intergenic	-88683	NM_001110219	10804	Hs.511757	NM_006783	ENSG00000121742	GJB6	CX30|DFNA3|DFNA3B|DFNB1B|ECTD2|ED2|EDH|HED|HED2	gap junction protein beta 6	protein-coding	7.7	16.34	6.02	2.06	0.55	2.56	2.08	-2.53443
chr7	132563262	132563762	intron (NR_133671, intron 6 of 10)	L2a|LINE|L2	119782	NR_134332	100506937	Hs.98247	NR_134332	ENSG00000225881	LOC100506937	-	uncharacterized LOC100506937	ncRNA	2.38	1.13	0.49	6.81	11.25	3.66	8.15	2.51816
chr3	177995355	177995855	Intergenic	Intergenic	-141384	NR_046786	100874330	Hs.201902	NR_046786	ENSG00000223941	LINC01014	KCNMB2-IT1	long intergenic non-protein coding RNA 1014	ncRNA	2.2	0.65	2.07	18.99	16.47	8.79	9.02	3.09143
chr7	139650841	139651341	intron (NM_001130966, intron 9 of 16)	L3|LINE|CR1	112430	NM_022750	64761	Hs.12646	NM_022750	ENSG00000059378	PARP12	ARTD12|MST109|MSTP109|ZC3H1|ZC3HDC1	poly(ADP-ribose) polymerase family member 12	protein-coding	1.1	2.75	0.99	10.29	7.41	13.37	13.88	2.85361
chr2	32554161	32554661	Intergenic	Intergenic	-27685	NM_016252	57448	Hs.150107	NM_016252	ENSG00000115760	BIRC6	APOLLON|BRUCE	baculoviral IAP repeat containing 6	protein-coding	2.57	1.78	1.09	8.39	18.94	11.54	9.72	2.76777
chr5	36481442	36481942	Intergenic	Intergenic	-124765	NM_001166696	6507	Hs.481918	NM_004172	ENSG00000079215	SLC1A3	EA6|EAAT1|GLAST|GLAST1	solute carrier family 1 member 3	protein-coding	8.99	9.71	6.22	2.22	1.65	2.56	1.39	-2.36658
chr10	30128766	30129266	Intergenic	Intergenic	-103086	NM_001323599	6840	Hs.499209	NM_003174	ENSG00000197321	SVIL	-	supervillin	protein-coding	17.06	36.89	4.74	3.8	3.02	3.66	1.04	-2.67861
chr2	227426650	227427150	Intergenic	Intergenic	96609	NR_049887	100847053		NR_049887	ENSG00000263363	MIR5702	-	microRNA 5702	ncRNA	1.83	0.49	2.67	9.97	8.78	8.24	11.1	2.445
chr9	126440872	126441372	intron (NM_024820, intron 5 of 20)	intron (NM_024820, intron 5 of 20)	-193221	NR_106972	102465688		NR_106972	ENSG00000274932	MIR7150	hsa-mir-7150	microRNA 7150	ncRNA	0.73	2.43	2.37	15.35	10.43	7.87	11.97	3.06032
chr8	106860490	106860990	intron (NR_125796, intron 2 of 7)	L1M3de|LINE|L1	211991	NR_125797	102723356	Hs.571413	NR_125796		ZFPM2-AS1	-	ZFPM2 antisense RNA 1	ncRNA	16.69	19.74	6.22	2.85	2.47	0.92	2.26	-2.81409
chr6	48744982	48745482	Intergenic	L1MA2|LINE|L1	685809	NM_000255	4594	Hs.485527	NM_000255	ENSG00000146085	MUT	MCM	methylmalonyl-CoA mutase	protein-coding	17.98	19.25	9.18	2.53	3.57	2.56	1.56	-2.7472
chr12	12556512	12557012	intron (NM_001300742, intron 2 of 3)	intron (NM_001300742, intron 2 of 3)	46749	NM_058169	118426	Hs.504805	NM_058169	ENSG00000165714	BORCS5	LOH12CR1|LOH1CR12	BLOC-1 related complex subunit 5	protein-coding	1.83	4.69	0.69	5.07	11.53	10.44	11.1	2.33623
chr12	70424772	70425272	Intergenic	Intergenic	205919	NM_182530	196446	Hs.253773	NM_182530	ENSG00000166268	MYRFL	C12orf15|C12orf28|bcm1377	myelin regulatory factor-like	protein-coding	9.17	20.71	5.14	0.63	1.1	1.46	2.6	-3.0308
chr22	45933508	45934008	intron (NM_006486, intron 8 of 16)	intron (NM_006486, intron 8 of 16)	35039	NM_001996	2192	Hs.24601	NM_001996	ENSG00000077942	FBLN1	FBLN|FIBL1	fibulin 1	protein-coding	22.01	41.74	8.3	3.8	1.92	3.85	3.99	-2.81135
chr4	165457951	165458451	Intergenic	Intergenic	-153794	NM_001166373	55016	Hs.592804	NM_017923	ENSG00000145416	MARCH1	MARCH-I|RNF171	membrane associated ring-CH-type finger 1	protein-coding	17.43	35.11	8.59	2.22	1.92	2.93	2.6	-3.2497
chr2	157045621	157046121	intron (NR_110250, intron 1 of 3)	intron (NR_110250, intron 1 of 3)	65572	NR_110249	101929378	Hs.171192	NR_110249	ENSG00000226383	LINC01876	-	long intergenic non-protein coding RNA 1876	ncRNA	2.93	1.78	2.86	24.38	14.82	8.06	10.24	2.42031
chr4	37701408	37701908	Intergenic	Intergenic	-13659	NM_001085400	768211	Hs.283378	NM_001085399	ENSG00000181826	RELL1	-	RELT like 1	protein-coding	2.2	1.13	3.26	18.04	16.19	7.14	19.26	2.49537
chr1	232428472	232428972	Intergenic	Intergenic	222632	NM_020808	57568	Hs.745009	NM_020808	ENSG00000116991	SIPA1L2	SPAL2	signal induced proliferation associated 1 like 2	protein-coding	16.69	23.14	6.72	0.63	3.02	2.01	2.78	-2.96741
chr15	22939030	22939530	intron (NM_001287810, intron 11 of 31)	intron (NM_001287810, intron 11 of 31)	-16475	NM_001033028	23191	Hs.26704	NM_014608	ENSG00000273749	CYFIP1	P140SRA-1|SHYC|SRA-1|SRA1	cytoplasmic FMR1 interacting protein 1	protein-coding	0	2.1	1.28	7.91	7.14	4.39	21.34	3.5655
chr13	101088310	101088810	intron (NM_001127692, intron 19 of 22)	MER51A|LTR|ERV1	44709	NR_047686	100885777	Hs.662554	NR_047686		PCCA-AS1	-	PCCA antisense RNA 1	ncRNA	2.2	0.65	2.17	9.97	9.06	12.45	6.42	2.36446
chr5	90245459	90245959	intron (NR_003149, intron 83 of 89)	intron (NR_003149, intron 83 of 89)	364510	NR_103548	100505994	Hs.628363	NR_103548	ENSG00000248323	LUCAT1	SCAL1	lung cancer associated transcript 1 (non-protein coding)	ncRNA	1.28	0.97	1.98	6.49	9.33	5.86	12.14	2.70373
chr6	73651452	73651952	intron (NM_001160133, intron 1 of 14)	intron (NM_001160133, intron 1 of 14)	25774	NR_036244	100423005		NR_036244	ENSG00000266180	MIR4282	-	microRNA 4282	ncRNA	2.57	1.62	1.38	26.91	9.06	2.56	12.84	2.5789
chr8	135029598	135030098	Intergenic	Intergenic	131109	NR_125424	101927822	Hs.129114	NR_125424	ENSG00000253593	LOC101927822	-	uncharacterized LOC101927822	ncRNA	2.02	1.94	0.89	22.16	11.25	8.61	19.61	3.45753
chr21	43013834	43014334	Intergenic	Intergenic	-85378	NR_024367	54090	Hs.570442	NR_024367		LINC00111	C21orf21|NCRNA00111	long intergenic non-protein coding RNA 111	ncRNA	1.1	2.43	2.67	17.09	10.15	6.77	14.57	2.67639
chr13	85568649	85569149	Intergenic	Intergenic	153293	NR_126383	104355140		NR_126383	ENSG00000226370	LINC00375	-	long intergenic non-protein coding RNA 375	ncRNA	2.38	0.49	0.2	13.14	13.72	5.86	8.33	3.09834
chr5	41817656	41818156	intron (NM_000436, intron 7 of 16)	intron (NM_000436, intron 7 of 16)	-52226	NR_046635	100874002	Hs.375537	NR_046635	ENSG00000248668	OXCT1-AS1	-	OXCT1 antisense RNA 1	ncRNA	1.1	1.29	1.78	8.86	18.66	5.49	2.78	2.54529
chr5	19880847	19881347	intron (NM_001291957, intron 1 of 12)	intron (NM_001291957, intron 1 of 12)	5284	NM_001291957	1016	Hs.317632	NM_004934	ENSG00000145526	CDH18	CDH14|CDH14L|CDH24	cadherin 18	protein-coding	0.92	0.81	1.09	24.22	9.61	4.03	9.72	3.47501
chr11	106337463	106337963	Intergenic	Intergenic	215579	NR_120551	101928535	Hs.409078	NR_120551	ENSG00000254811	LOC101928535	-	uncharacterized LOC101928535	ncRNA	1.47	3.88	1.38	10.29	9.33	4.94	7.46	2.35226
chr2	14675209	14675709	Intergenic	Intergenic	-97348	NR_144632	151354	Hs.260855	NM_145175	ENSG00000162981	FAM84A	NSE1|PP11517	family with sequence similarity 84 member A	protein-coding	18.71	46.43	12.64	4.43	3.29	4.03	1.73	-2.92355
chr11	126624650	126625150	intron (NM_032531, intron 1 of 16)	intron (NM_032531, intron 1 of 16)	98919	NR_120533	101929427	Hs.600341	NR_120532	ENSG00000254607	LOC101929427	-	uncharacterized LOC101929427	ncRNA	1.65	0.32	2.17	21.53	11.25	7.51	17.18	3.51376
chr7	80785003	80785503	Intergenic	Intergenic	-236586	NM_006379	10512	Hs.269109	NM_006379	ENSG00000075223	SEMA3C	SEMAE|SemE	semaphorin 3C	protein-coding	0.92	1.46	1.68	11.71	8.23	8.97	6.77	2.79223
chr18	7926490	7926990	intron (NM_001105244, intron 5 of 32)	intron (NM_001105244, intron 5 of 32)	359426	NM_001105244	5797	Hs.49774	NM_002845	ENSG00000173482	PTPRM	PTPRL1|R-PTP-MU|RPTPM|RPTPU|hR-PTPu	protein tyrosine phosphatase, receptor type M	protein-coding	0.73	0.65	1.48	7.6	10.15	5.68	8.67	2.78164
chr8	118628779	118629279	Intergenic	Intergenic	96077	NM_080651	90390	Hs.492612	NM_080651	ENSG00000164758	MED30	MED30S|THRAP6|TRAP25	mediator complex subunit 30	protein-coding	1.28	1.94	1.78	8.23	8.51	8.42	10.06	2.569
chr8	95926427	95926927	Intergenic	Tigger10|DNA|TcMar-Tigger	-19195	NM_057749	9134	Hs.521693	NM_004702	ENSG00000175305	CCNE2	CYCE2	cyclin E2	protein-coding	2.2	2.59	3.46	18.04	10.43	11.17	18.56	2.36741
chr2	231959279	231959779	intron (NR_034059, intron 15 of 23)	HERVK22-int|LTR|ERVK	30295	NM_000867	3357	Hs.421649	NM_000867	ENSG00000135914	HTR2B	5-HT(2B)|5-HT-2B|5-HT2B	5-hydroxytryptamine receptor 2B	protein-coding	3.67	1.94	0.89	7.91	11.8	5.31	13.01	2.34441
chr6	20274467	20274967	Intergenic	L2b|LINE|L2	-62022	NM_001080480	154141	Hs.377830	NM_001080480	ENSG00000172197	MBOAT1	LPEAT1|LPLAT|LPLAT 1|LPSAT|OACT1|dJ434O11.1	membrane bound O-acyltransferase domain containing 1	protein-coding	2.75	0.97	2.37	16.14	6.04	7.51	16.66	2.40209
chr3	110462035	110462535	Intergenic	Intergenic	326521	NR_045114	100506555	Hs.535689	NR_045114		PVRL3-AS1	-	PVRL3 antisense RNA 1	ncRNA	1.47	0.32	0.79	15.99	10.43	6.04	7.98	3.10433
chr10	33485492	33485992	TTS (NM_001024629)	TTS (NM_001024629)	138091	NM_001330068	8829	Hs.131704	NM_003873	ENSG00000099250	NRP1	BDCA4|CD304|NP1|NRP|VEGF165R	neuropilin 1	protein-coding	2.75	3.07	3.46	20.1	18.11	11.9	15.79	2.50498
chr9	28916290	28916790	intron (NM_001258282, intron 2 of 6)	MER4D1|LTR|ERV1	-27587	NR_030618	100126316		NR_030618	ENSG00000215939	MIR873	MIRN873|hsa-mir-873|mir-873	microRNA 873	ncRNA	2.2	0.97	2.57	11.71	12.9	11.17	9.89	2.35289
chr9	7433976	7434476	Intergenic	L1PA15-16|LINE|L1	365580	NM_001318058	90871	Hs.7517	NM_033428	ENSG00000137038	TMEM261	C9orf123	transmembrane protein 261	protein-coding	21.83	27.02	9.98	3.64	3.02	2.01	3.99	-2.86036
chr16	75977929	75978429	Intergenic	Intergenic	296544	NR_144545	54386	Hs.301419	NM_018975	ENSG00000166848	TERF2IP	DRIP5|RAP1	TERF2 interacting protein	protein-coding	0.73	2.1	1.09	5.22	7.96	13.37	5.38	2.73909
chr4	138966082	138966582	intron (NR_037866, intron 8 of 10)	MER61D|LTR|ERV1	-43836	NR_038380	641364	Hs.570846	NR_038380	ENSG00000250033	SLC7A11-AS1	-	SLC7A11 antisense RNA 1	ncRNA	8.44	9.71	6.72	2.06	2.2	1.28	1.04	-2.80237
chr16	80971822	80972322	Intergenic	MLT1I|LTR|ERVL-MaLR	-45579	NR_131948	100996425	Hs.125350	NR_131947	ENSG00000260896	PRCAT47	-	prostate cancer-associated 47	ncRNA	8.25	16.99	5.83	1.27	2.2	1.65	2.26	-2.57638
chr14	68509211	68509711	intron (NM_001321809, intron 7 of 11)	intron (NM_001321809, intron 7 of 11)	219152	NM_001321815	5890	Hs.172587	NM_002877	ENSG00000182185	RAD51B	R51H2|RAD51L1|REC2	RAD51 paralog B	protein-coding	12.11	16.02	3.56	1.74	2.2	1.1	1.39	-2.85993
chr2	88557673	88558173	Intergenic	Intergenic	85265	NM_018271	55258	Hs.739080	NM_018271	ENSG00000144115	THNSL2	SOFAT|THS2|TSH2	threonine synthase like 2	protein-coding	11.74	16.5	6.02	1.9	3.02	3.66	1.73	-2.39091
chr9	27626193	27626693	Intergenic	Intergenic	-52579	NM_001256054	203228	Hs.493639	NM_018325	ENSG00000147894	C9orf72	ALSFTD|DENNL72|FTDALS|FTDALS1	chromosome 9 open reading frame 72	protein-coding	2.2	2.75	2.27	14.25	15.37	10.25	20.13	2.68698
chr4	24350767	24351267	intron (NM_001330752, intron 1 of 13)	L1PB1|LINE|L1	123435	NM_001330751	10891	Hs.527078	NM_013261	ENSG00000109819	PPARGC1A	LEM6|PGC-1(alpha)|PGC-1alpha|PGC-1v|PGC1|PGC1A|PPARGC1	PPARG coactivator 1 alpha	protein-coding	12.66	11.81	7.6	3.01	1.1	2.56	1.39	-2.66793
chr7	69988545	69989045	intron (NM_015570, intron 5 of 18)	intron (NM_015570, intron 5 of 18)	-608728	NM_022479	64409	Hs.488591	NM_022479	ENSG00000185274	WBSCR17	GALNACT17|GALNT16|GALNT20|GALNTL3|GalNAc-T5L	Williams-Beuren syndrome chromosome region 17	protein-coding	8.25	18.28	5.63	2.69	2.47	2.75	1.21	-2.58837
chr11	27817765	27818553	Intergenic	Intergenic	-74554	NM_170731	627	Hs.502182	NM_001709	ENSG00000176697	BDNF	ANON2|BULN2	brain derived neurotrophic factor	protein-coding	6.05	6.63	7.8	22.95	38.15	26.55	30.54	2.98639
chr5	138750959	138751459	intron (NM_152686, intron 7 of 7)	intron (NM_152686, intron 7 of 7)	-11433	NM_194296	202051	Hs.373612	NM_194296	ENSG00000170469	SPATA24	CCDC161|T6441	spermatogenesis associated 24	protein-coding	9.91	30.9	7.21	3.01	2.2	1.46	2.78	-2.66824
chr2	216054039	216054539	Intergenic	L2c|LINE|L2	-51138	NR_103740	26154	Hs.134585	NM_015657	ENSG00000144452	ABCA12	ARCI4A|ARCI4B|ICR2B|LI2	ATP binding cassette subfamily A member 12	protein-coding	15.41	13.59	7.01	2.53	2.2	3.3	2.95	-2.39809
chr5	145358760	145359260	intron (NM_152550, intron 2 of 9)	MIRb|SINE|MIR	42884	NM_152550	153769	Hs.443728	NM_152550	ENSG00000156463	SH3RF2	HEPP1|POSHER|PPP1R39|RNF158	SH3 domain containing ring finger 2	protein-coding	3.49	1.13	1.48	15.67	12.62	10.44	7.81	2.86821
chr3	52140954	52141454	intron (NM_015426, intron 9 of 10)	intron (NM_015426, intron 9 of 10)	-42076	NR_027331	100128378	Hs.640106	NM_001123039		LINC00696	C3orf74	long intergenic non-protein coding RNA 696	ncRNA	14.12	23.62	6.22	2.06	1.92	2.38	4.16	-2.45257
chr1	209589280	209589780	Intergenic	Intergenic	-12638	NM_001104548	642587	Hs.510543	NM_001104548		MIR205HG	LINC00510	MIR205 host gene	protein-coding	19.26	29.77	7.7	1.9	3.84	1.65	3.64	-3.21621
chr12	95711907	95712407	Intergenic	Intergenic	8458	NR_037456	100500802		NR_037456	ENSG00000265917	MIR3685	-	microRNA 3685	ncRNA	1.47	1.29	2.07	13.61	10.43	7.14	11.8	2.71768
chr16	17163918	17164418	Intergenic	Intergenic	-64193	NR_135179	102723692	Hs.737758	NR_135179	ENSG00000261448	LOC102723692	-	uncharacterized LOC102723692	ncRNA	9.72	26.86	4.05	3.17	3.29	0.92	0.17	-2.87159
chr10	105517414	105517914	intron (NM_014631, intron 3 of 13)	intron (NM_014631, intron 3 of 13)	11127	NR_038940	100505839	Hs.655149	NR_038940	ENSG00000280693	SH3PXD2A-AS1	-	SH3PXD2A antisense RNA 1	ncRNA	13.57	22.65	7.11	4.43	1.1	3.66	2.43	-2.34505
chr9	112069576	112070076	intron (NM_018424, intron 1 of 15)	intron (NM_018424, intron 1 of 15)	13418	NM_018424	54566	Hs.591901	NM_018424	ENSG00000095203	EPB41L4B	CG1|EHM2	erythrocyte membrane protein band 4.1 like 4B	protein-coding	1.47	3.07	2.17	8.86	14	17.94	8.33	2.76775
chr6	11273089	11273589	intron (NM_001142393, intron 2 of 7)	intron (NM_001142393, intron 2 of 7)	-40424	NM_001271033	4739	Hs.37982	NM_006403	ENSG00000111859	NEDD9	CAS-L|CAS2|CASL|CASS2|HEF1	neural precursor cell expressed, developmentally down-regulated 9	protein-coding	1.47	1.62	1.98	8.07	11.8	10.07	6.94	2.49718
chr2	38947621	38948121	intron (NM_138801, intron 4 of 6)	MLT1G3|LTR|ERVL-MaLR	30765	NM_001031684	6432	Hs.309090	NM_006276	ENSG00000115875	SRSF7	9G8|AAG3|SFRS7	serine and arginine rich splicing factor 7	protein-coding	6.79	21.52	6.22	1.58	0	2.56	1.39	-3.03667
chr17	30925063	30925563	intron (NM_001303279, intron 21 of 21)	AluSz6|SINE|Alu	111208	NM_003885	8851	Hs.500015	NM_003885	ENSG00000176749	CDK5R1	CDK5P35|CDK5R|NCK5A|p23|p25|p35|p35nck5a	cyclin dependent kinase 5 regulatory subunit 1	protein-coding	8.44	13.91	5.23	2.37	1.65	1.28	2.08	-2.52296
chr3	151637147	151637647	intron (NR_110203, intron 1 of 2)	intron (NR_110203, intron 1 of 2)	8566	NR_110203	101928142	Hs.680207	NR_110202		AADACL2-AS1	-	AADACL2 antisense RNA 1	ncRNA	20.73	27.02	8.99	1.9	4.39	1.65	2.95	-2.76618
chr18	52434285	52434785	Intergenic	Intergenic	-61173	NM_004163	5874	Hs.25318	NM_004163	ENSG00000041353	RAB27B	C25KG	RAB27B, member RAS oncogene family	protein-coding	1.28	0.97	1.38	11.87	10.7	7.32	10.76	2.90376
chr1	241413689	241414189	intron (NM_002924, intron 2 of 17)	intron (NM_002924, intron 2 of 17)	106591	NM_002924	6000	Hs.655739	NM_002924	ENSG00000182901	RGS7	-	regulator of G-protein signaling 7	protein-coding	1.28	1.62	2.57	15.04	11.8	9.7	7.29	2.53172
chr5	131780825	131781325	intron (NR_045116, intron 2 of 3)	L2c|LINE|L2	34610	NR_045116	441108	Hs.658288	NM_001013717	ENSG00000197536	C5orf56	-	chromosome 5 open reading frame 56	ncRNA	9.91	16.66	3.95	1.58	0	2.01	1.73	-2.76346
chr4	85964940	85965440	Intergenic	L1PA7|LINE|L1	77219	NR_015359	404201	Hs.720920	NM_205857	ENSG00000180769	WDFY3-AS2	C4orf12|FBI4|NCRNA00247	WDFY3 antisense RNA 2	ncRNA	2.2	3.4	4.44	13.45	25.8	16.66	14.23	2.4589
chr6	147880039	147880539	intron (NM_001030060, intron 1 of 1)	intron (NM_001030060, intron 1 of 1)	50461	NM_001030060	389432	Hs.567973	NM_001030060	ENSG00000203727	SAMD5	dJ875H10.1	sterile alpha motif domain containing 5	protein-coding	1.65	0.97	1.38	10.13	10.7	7.14	6.25	2.47311
chr15	32312366	32312866	Intergenic	L1MC5|LINE|L1	-10070	NM_000746	1139	Hs.511772	NM_000746	ENSG00000175344	CHRNA7	CHRNA7-2|NACHRA7	cholinergic receptor nicotinic alpha 7 subunit	protein-coding	1.83	2.27	1.88	14.09	15.37	10.07	7.81	2.44832
chr4	15160222	15160722	intron (NR_125911, intron 2 of 5)	L1PB1|LINE|L1	156174	NM_001177381	132864	Hs.656937	NM_182485	ENSG00000137449	CPEB2	CPE-BP2|CPEB-2|hCPEB-2	cytoplasmic polyadenylation element binding protein 2	protein-coding	10.64	20.71	8.69	1.74	1.37	0.73	3.12	-3.18715
chr3	118930043	118930543	TTS (NM_212543)	TTS (NM_212543)	-15040	NR_046574	100874201	Hs.721307	NR_046574	ENSG00000240254	B4GALT4-AS1	-	B4GALT4 antisense RNA 1	ncRNA	3.3	2.1	1.98	14.56	13.72	10.62	16.31	2.51551
chr12	15865663	15866163	intron (NM_004447, intron 1 of 20)	intron (NM_004447, intron 1 of 20)	76597	NM_004447	2059	Hs.591160	NM_004447	ENSG00000151491	EPS8	DFNB102	epidermal growth factor receptor pathway substrate 8	protein-coding	0.73	1.62	1.88	13.45	18.39	11.17	16.83	3.28266
chr18	9688274	9688774	Intergenic	Intergenic	-19704	NM_006868	11031	Hs.99528	NM_006868	ENSG00000168461	RAB31	Rab22B	RAB31, member RAS oncogene family	protein-coding	11.01	25.89	8.79	1.11	1.92	3.3	2.08	-2.84959
chr3	111480247	111480747	intron (NM_001134437, intron 1 of 17)	MER5A|DNA|hAT-Charlie	29170	NM_001134437	90102	Hs.603252	NM_145753	ENSG00000144824	PHLDB2	LL5b|LL5beta	pleckstrin homology like domain family B member 2	protein-coding	11.19	23.94	5.93	4.43	2.47	2.2	2.26	-2.3855
chr3	11571497	11571997	intron (NM_001136031, intron 17 of 17)	intron (NM_001136031, intron 17 of 17)	38651	NM_001128221	9686	Hs.740389	NM_014667	ENSG00000144560	VGLL4	VGL-4	vestigial like family member 4	protein-coding	7.89	22.65	6.42	1.58	2.74	2.2	0.69	-2.90778
chr3	182106772	182107603	Intergenic	Intergenic	96962	NR_040105	401103	Hs.591304	NR_040105	ENSG00000241098	LINC01994	-	long intergenic non-protein coding RNA 1994	ncRNA	20.91	21.03	8.39	13.14	10.98	7.87	9.2	-2.54553
chr9	71355446	71355946	intron (NM_001278253, intron 1 of 13)	intron (NM_001278253, intron 1 of 13)	35366	NM_003558	8395	Hs.534371	NM_003558	ENSG00000107242	PIP5K1B	MSS4|STM7	phosphatidylinositol-4-phosphate 5-kinase type 1 beta	protein-coding	3.49	5.82	1.78	20.42	16.47	13.92	19.95	2.45204
chr9	90524619	90525119	Intergenic	Intergenic	-8008	NM_001145124	441452	Hs.652956	NM_001145124		SPATA31C1	FAM75C1|SPATA31C2	SPATA31 subfamily C member 1	protein-coding	1.47	6.96	4.94	25.8	20.31	20.69	26.2	2.63708
chr3	95985584	95986084	Intergenic	MLT1E|LTR|ERVL-MaLR	-92974	NR_107027	102465864		NR_107027	ENSG00000278103	MIR8060	hsa-mir-8060	microRNA 8060	ncRNA	1.47	2.27	1.38	5.86	10.15	14.46	13.88	2.83133
chr2	163444163	163444663	intron (NM_173162, intron 2 of 7)	intron (NM_173162, intron 2 of 7)	-181033	NR_110258	101929570	Hs.470445	NR_110258	ENSG00000237750	LOC101929570	-	uncharacterized LOC101929570	ncRNA	0.92	2.27	1.48	13.3	8.78	7.51	17.52	3.12626
chr12	105347085	105347585	Intergenic	Intergenic	-24863	NM_032148	84102	Hs.577463	NM_032148	ENSG00000136052	SLC41A2	SLC41A1-L1	solute carrier family 41 member 2	protein-coding	2.02	1.29	2.07	15.51	11.25	6.96	14.57	2.45294
chr1	234668803	234669303	Intergenic	Intergenic	-1528	NR_038426	100506795	Hs.448989	NR_038426	ENSG00000231768	LINC01354	-	long intergenic non-protein coding RNA 1354	ncRNA	9.54	22.16	6.62	2.69	1.65	0.92	3.82	-2.61702
chr2	223660706	223661206	Intergenic	Intergenic	-64776	NM_004457	2181	Hs.655772	NM_004457	ENSG00000123983	ACSL3	ACS3|FACL3|PRO2194	acyl-CoA synthetase long-chain family member 3	protein-coding	0.73	3.4	1.48	20.74	19.49	8.06	14.92	3.5534
chr9	16824423	16824923	intron (NM_017637, intron 1 of 6)	intron (NM_017637, intron 1 of 6)	46113	NM_017637	54796	Hs.656581	NM_017637	ENSG00000173068	BNC2	BSN2	basonuclin 2	protein-coding	14.67	40.77	8.69	3.17	3.02	2.38	2.26	-2.81714
chr15	37584090	37584590	Intergenic	Tigger3b|DNA|TcMar-Tigger	-190840	NM_001220482	4212	Hs.510989	NM_002399	ENSG00000134138	MEIS2	HsT18361|MRG1	Meis homeobox 2	protein-coding	0.92	0.81	1.58	13.93	7.41	5.31	10.41	3.16426
chr6	2259197	2259697	intron (NR_046229, intron 2 of 6)	intron (NR_046229, intron 2 of 6)	13460	NR_046229	100508120	Hs.188825	NR_046229		GMDS-AS1	-	GMDS antisense RNA 1 (head to head)	ncRNA	1.83	2.43	1.98	16.14	10.7	3.48	15.96	2.47645
chr2	168953908	168954408	intron (NM_013233, intron 10 of 17)	AluJr|SINE|Alu	149947	NM_013233	27347	Hs.276271	NM_013233	ENSG00000198648	STK39	DCHT|PASK|SPAK	serine/threonine kinase 39	protein-coding	10.27	16.83	6.12	0.95	2.2	2.93	1.39	-2.62871
chr11	124952782	124953282	intron (NM_198277, intron 10 of 18)	intron (NM_198277, intron 10 of 18)	20019	NM_198277	219855	Hs.352661	NM_198277	ENSG00000134955	SLC37A2	pp11662	solute carrier family 37 member 2	protein-coding	15.96	34.46	11.36	3.8	0	2.56	4.86	-2.79336
chr21	30609324	30609824	intron (NR_027072, intron 1 of 1)	intron (NR_027072, intron 1 of 1)	43759	NR_027072	193629	Hs.720711	NM_138968	ENSG00000215533	LINC00189	C21orf109|NCRNA00189	long intergenic non-protein coding RNA 189	ncRNA	4.95	22.65	7.11	2.37	3.57	1.28	0.69	-2.36215
chr11	6273281	6273781	Intergenic	Intergenic	-7373	NM_001318029	887	Hs.203	NM_176875	ENSG00000110148	CCKBR	CCK-B|CCK2R|GASR	cholecystokinin B receptor	protein-coding	3.85	2.43	3.65	41	16.74	5.68	13.88	2.46256
chr14	53917540	53918040	Intergenic	Intergenic	297718	NR_110062	101927620		NR_110062	ENSG00000258731	LOC101927620	-	uncharacterized LOC101927620	ncRNA	1.65	1.13	1.68	9.34	10.7	6.41	6.42	2.34971
chr13	100119985	100120485	Intergenic	Intergenic	31325	NR_110731	102725509	Hs.648968	NR_110731		LINC01232	TCONS_00021520	long intergenic non-protein coding RNA 1232	ncRNA	2.2	0.97	0.59	7.44	7.96	8.42	10.24	2.53182
chr4	55350476	55350976	Intergenic	Intergenic	122572	NR_134657	339978		NR_134657	ENSG00000250456	LOC339978	-	uncharacterized LOC339978	ncRNA	17.24	38.18	6.52	3.64	1.92	3.11	3.99	-2.83664
chr2	49451701	49452201	Intergenic	Intergenic	-70285	NM_181446	2492	Hs.1428	NM_000145	ENSG00000170820	FSHR	FSHR1|FSHRO|LGR1|ODG1	follicle stimulating hormone receptor	protein-coding	12.29	17.47	4.54	2.37	2.74	1.1	1.56	-2.63927
chr1	237963073	237963573	intron (NM_001035, intron 97 of 104)	intron (NM_001035, intron 97 of 104)	-62152	NR_027247	100130331	Hs.661736	NR_027247	ENSG00000237250	LOC100130331	-	POTE ankyrin domain family, member F pseudogene	pseudo	3.12	1.62	2.77	17.41	19.21	10.25	15.44	2.39024
chr3	179514913	179515413	3' UTR (NM_001256750, exon 15 of 15)	3' UTR (NM_001256750, exon 15 of 15)	-100819	NR_110059	101928790	Hs.667247	NR_110059	ENSG00000244302	PEX5L-AS2	-	PEX5L antisense RNA 2	ncRNA	1.83	0.49	1.48	18.04	5.49	3.85	6.25	2.40333
chr2	20690446	20690946	Intergenic	Intergenic	43864	NM_004040	388	Hs.502876	NM_004040	ENSG00000143878	RHOB	ARH6|ARHB|MST081|MSTP081|RHOH6	ras homolog family member B	protein-coding	12.66	37.53	7.7	3.96	1.37	2.75	4.51	-2.45969
chr16	88554540	88555040	intron (NM_153813, intron 2 of 9)	CpG	19464	NR_049821	100847057		NR_049821	ENSG00000263456	MIR5189	mir-5189	microRNA 5189	ncRNA	3.12	5.34	3.26	18.36	18.39	19.23	22.73	2.43962
chr2	235277374	235277874	Intergenic	Intergenic	128069	NM_005737	10123	Hs.111554	NM_005737	ENSG00000188042	ARL4C	ARL7|LAK	ADP ribosylation factor like GTPase 4C	protein-coding	14.86	18.93	5.14	2.53	3.29	2.2	3.3	-2.43604
chr19	36640843	36641343	TTS (NM_001864)	TTS (NM_001864)	2678	NM_001864	1346	Hs.421621	NM_001864	ENSG00000161281	COX7A1	COX7A|COX7AH|COX7AM	cytochrome c oxidase subunit 7A1	protein-coding	19.99	39.48	10.57	3.64	4.12	3.3	2.78	-2.82254
chr10	74439494	74439994	Intergenic	Intergenic	-12145	NR_073062	90550	Hs.591366	NM_138357	ENSG00000156026	MCU	C10orf42|CCDC109A|HsMCU	mitochondrial calcium uniporter	protein-coding	1.28	1.62	1.68	8.07	8.78	8.42	16.14	3.01543
chr4	140752619	140753119	intron (NM_018717, intron 3 of 5)	intron (NM_018717, intron 3 of 5)	165947	NM_002413	4258	Hs.81874	NM_002413	ENSG00000085871	MGST2	GST2|MGST-II	microsomal glutathione S-transferase 2	protein-coding	1.47	2.91	1.38	11.08	11.25	9.89	7.46	2.53907
chr13	20837518	20838018	Intergenic	HAL1|LINE|L1	-31234	NM_001110219	10804	Hs.511757	NM_006783	ENSG00000121742	GJB6	CX30|DFNA3|DFNA3B|DFNB1B|ECTD2|ED2|EDH|HED|HED2	gap junction protein beta 6	protein-coding	2.02	0.97	0.99	6.96	7.14	7.51	6.59	2.34329
chr6	148628492	148628992	intron (NM_001346505, intron 1 of 19)	intron (NM_001346505, intron 1 of 19)	-34987	NM_001346506	23328	Hs.193133	NM_015278	ENSG00000111961	SASH1	SH3D6A|dJ323M4.1	SAM and SH3 domain containing 1	protein-coding	13.76	17.47	3.36	2.37	1.92	1.46	1.73	-2.97602
chr5	81931354	81931854	Intergenic	Intergenic	-204370	NR_039773	100616297		NR_039773	ENSG00000283359	MIR3977	-	microRNA 3977	ncRNA	1.47	1.46	1.88	12.82	10.7	10.99	15.44	3.01589
chr6	7561384	7562235	intron (NM_001008844, intron 4 of 23)	intron (NM_001008844, intron 4 of 23)	20002	NM_004415	1832	Hs.519873	NM_004415	ENSG00000096696	DSP	DCWHKTA|DP	desmoplakin	protein-coding	8.07	7.6	4.25	36.72	27.99	16.3	19.95	2.40488
chr8	57493122	57493622	Intergenic	Intergenic	-20990	NR_038236	100507632	Hs.583755	NR_038236	ENSG00000246430	LINC00968	-	long intergenic non-protein coding RNA 968	ncRNA	10.64	19.9	5.83	1.27	3.84	2.38	2.95	-2.33691
chr2	15006976	15007476	Intergenic	Intergenic	232011	NM_001291410	151354	Hs.260855	NM_145175	ENSG00000162981	FAM84A	NSE1|PP11517	family with sequence similarity 84 member A	protein-coding	2.38	1.94	1.78	15.83	12.9	7.14	9.37	2.54602
chr1	222299374	222299874	Intergenic	Intergenic	-285616	NR_125989	101929771	Hs.557001	NR_125989	ENSG00000227925	LINC01655	-	long intergenic non-protein coding RNA 1655	ncRNA	1.83	0.16	1.48	12.66	8.78	5.86	7.98	2.82215
chr2	169053320	169053820	intron (NM_013233, intron 1 of 17)	L2a|LINE|L2	50535	NM_013233	27347	Hs.276271	NM_013233	ENSG00000198648	STK39	DCHT|PASK|SPAK	serine/threonine kinase 39	protein-coding	2.75	2.27	2.57	20.1	12.08	10.62	11.45	2.61484
chr12	75523001	75523501	intron (NM_001260497, intron 2 of 4)	intron (NM_001260497, intron 2 of 4)	80277	NM_001260498	3747	Hs.27214	NM_139136	ENSG00000166006	KCNC2	KV3.2	potassium voltage-gated channel subfamily C member 2	protein-coding	2.02	0.97	2.67	18.36	14.55	8.06	13.01	2.74898
chr4	16723186	16723686	intron (NM_001130834, intron 2 of 8)	intron (NM_001130834, intron 2 of 8)	176996	NM_001290	9079	Hs.714330	NM_001290	ENSG00000169744	LDB2	CLIM1|LDB-2|LDB1	LIM domain binding 2	protein-coding	1.83	0.65	1.98	13.3	14.82	7.14	7.29	2.52682
chr11	113776791	113777713	intron (NM_006028, intron 1 of 8)	intron (NM_006028, intron 1 of 8)	1734	NM_006028	9177	Hs.241377	NM_006028	ENSG00000149305	HTR3B	5-HT3B	5-hydroxytryptamine receptor 3B	protein-coding	0.73	3.88	2.96	22.32	23.6	17.94	11.1	2.67386
chr18	21405901	21406401	intron (NM_001127717, intron 21 of 73)	intron (NM_001127717, intron 21 of 73)	-46833	NM_001127718	3909	Hs.436367	NM_000227	ENSG00000053747	LAMA3	BM600|E170|LAMNA|LOCS	laminin subunit alpha 3	protein-coding	5.69	18.28	9.98	2.69	1.37	2.56	1.73	-2.68758
chr5	107075335	107075835	Intergenic	MIR|SINE|MIR	-68989	NM_001962	1946	Hs.288741	NM_001962	ENSG00000184349	EFNA5	AF1|EFL5|EPLG7|GLC1M|LERK7|RAGS	ephrin A5	protein-coding	1.1	0.49	3.16	19.31	17.29	7.87	15.79	2.83029
chr1	201280569	201281288	intron (NM_001005337, intron 2 of 13)	intron (NM_001005337, intron 2 of 13)	28349	NM_000299	5317	Hs.497350	NM_000299	ENSG00000081277	PKP1	B6P	plakophilin 1	protein-coding	39.99	82.84	11.95	6.96	6.31	6.77	6.94	-2.65545
chr1	106206966	106207660	Intergenic	ERVL-B4-int|LTR|ERVL	-45756	NR_125955	101928476	Hs.563856	NR_125954	ENSG00000230768	LINC01676	-	long intergenic non-protein coding RNA 1676	ncRNA	2.02	0.97	4.25	15.51	17.56	11.17	11.8	2.88965
chr12	57489817	57490317	TTS (NM_005967)	TTS (NM_005967)	7390	NM_001330305	4665	Hs.159223	NM_005967	ENSG00000166886	NAB2	MADER	NGFI-A binding protein 2	protein-coding	33.02	52.26	9.88	2.69	6.04	4.94	7.63	-2.42131
chr10	101651609	101652109	intron (NM_001318327, intron 8 of 13)	SVA_F|Other|Other	21990	NM_001318327	23268	Hs.500771	NM_015221	ENSG00000107554	DNMBP	ARHGEF36|TUBA	dynamin binding protein	protein-coding	1.83	1.46	1.88	9.18	6.86	8.06	6.94	2.43417
chr6	128551648	128552148	intron (NM_001135648, intron 5 of 30)	intron (NM_001135648, intron 5 of 30)	202888	NR_125849	101928140	Hs.656779	NR_125849		LOC101928140	-	uncharacterized LOC101928140	ncRNA	1.28	2.75	1.88	9.5	12.62	6.77	9.02	2.38507
chr8	107405099	107405599	intron (NM_001198533, intron 2 of 16)	intron (NM_001198533, intron 2 of 16)	-54803	NM_001198532	55074	Hs.127286	NM_018002	ENSG00000164830	OXR1	Nbla00307|TLDC3	oxidation resistance 1	protein-coding	2.57	1.13	1.19	11.24	8.23	7.87	10.58	2.61791
chr4	4204129	4204629	intron (NM_177998, intron 3 of 5)	intron (NM_177998, intron 3 of 5)	24242	NM_177998	133060	Hs.534544	NM_177998	ENSG00000163982	OTOP1	-	otopetrin 1	protein-coding	8.99	26.21	4.64	1.27	3.57	2.93	2.08	-2.45631
chr3	171470762	171471262	intron (NM_002662, intron 1 of 26)	intron (NM_002662, intron 1 of 26)	57272	NM_001130081	5337	Hs.382865	NM_002662	ENSG00000075651	PLD1	-	phospholipase D1	protein-coding	23.3	51.13	10.07	5.07	6.04	4.03	3.64	-2.37731
chr11	121457402	121457902	intron (NM_003105, intron 27 of 47)	MER5B|DNA|hAT-Charlie	134740	NM_003105	6653	Hs.368592	NM_003105	ENSG00000137642	SORL1	C11orf32|LR11|LRP9|SORLA|SorLA-1|gp250	sortilin related receptor 1	protein-coding	2.2	1.94	1.88	11.55	18.66	11.35	2.6	2.71288
chr8	134441213	134441713	Intergenic	Intergenic	-131916	NM_006096	10397	Hs.372914	NM_006096	ENSG00000104419	NDRG1	CAP43|CMT4D|DRG-1|DRG1|GC4|HMSNL|NDR1|NMSL|PROXY1|RIT42|RTP|TARG1|TDD5	N-myc downstream regulated 1	protein-coding	3.67	3.72	2.17	29.28	20.86	24.9	19.95	3.01067
chr8	114117369	114117869	intron (NM_052900, intron 4 of 68)	L1MEc|LINE|L1	271763	NM_198124	114788	Hs.91381	NM_052900	ENSG00000164796	CSMD3	-	CUB and Sushi multiple domains 3	protein-coding	1.83	1.62	0.49	9.18	6.86	13	9.54	2.90982
chr2	215971921	215972817	intron (NR_103740, intron 2 of 54)	intron (NR_103740, intron 2 of 54)	30782	NM_173076	26154	Hs.134585	NM_015657	ENSG00000144452	ABCA12	ARCI4A|ARCI4B|ICR2B|LI2	ATP binding cassette subfamily A member 12	protein-coding	16.88	35.27	11.85	3.17	4.67	3.66	5.55	-2.36737
chr15	94020266	94020766	Intergenic	L2b|LINE|L2	-379273	NR_120321	101927153	Hs.371900	NR_120321		LOC101927153	-	uncharacterized LOC101927153	ncRNA	12.66	17.8	6.42	0.79	2.2	3.11	2.26	-2.6993
chr10	93316365	93316865	intron (NR_024467, intron 1 of 4)	intron (NR_024467, intron 1 of 4)	54602	NR_024467	100188947	Hs.535293	NR_024467		HECTD2-AS1	-	HECTD2 antisense RNA 1	ncRNA	4.04	2.91	1.88	19.31	20.03	13.73	15.96	2.50578
chr8	101690847	101691347	Intergenic	Intergenic	24155	NR_106992	102466854		NR_106992	ENSG00000070756	MIR7705	hsa-mir-7705	microRNA 7705	ncRNA	11.92	19.9	3.06	1.9	1.37	2.2	2.6	-2.62524
chr7	10855112	10855612	Intergenic	L2a|LINE|L2	124451	NM_002489	4697	Hs.50098	NM_002489	ENSG00000189043	NDUFA4	CI-9k|CI-MLRQ|MLRQ	NDUFA4, mitochondrial complex associated	protein-coding	2.75	1.46	2.07	12.35	22.78	12.08	19.61	2.83645
chr1	24611675	24612175	Intergenic	Intergenic	-33887	NM_198173	57822	Hs.657920	NM_021180	ENSG00000158055	GRHL3	SOM|TFCP2L4|VWS2	grainyhead like transcription factor 3	protein-coding	17.79	34.78	9.09	2.22	3.57	3.85	3.64	-2.7458
chr1	241778760	241779260	intron (NM_014322, intron 1 of 3)	intron (NM_014322, intron 1 of 3)	20222	NM_001821	1122	Hs.654545	NM_001821	ENSG00000203668	CHML	REP2	CHM like, Rab escort protein 2	protein-coding	2.38	2.27	3.26	15.83	15.92	8.06	15.09	2.33252
chr12	85833991	85834491	Intergenic	LTR40b|LTR|ERVL	160205	NM_006982	8092	Hs.41683	NM_006982	ENSG00000180318	ALX1	CART1|FND3|HEL23	ALX homeobox 1	protein-coding	2.02	2.1	0.99	16.62	11.8	9.34	11.45	2.81946
chr1	182057105	182057605	Intergenic	Intergenic	-26508	NM_001009992	127665	Hs.684328	NM_001009992	ENSG00000179930	ZNF648	-	zinc finger protein 648	protein-coding	22.56	66.82	11.56	4.43	4.67	2.93	2.78	-3.03629
chr3	17522618	17523118	intron (NM_014744, intron 3 of 21)	MER52A|LTR|ERV1	218644	NM_001134381	9779	Hs.475629	NM_014744	ENSG00000131374	TBC1D5	-	TBC1 domain family member 5	protein-coding	12.47	37.53	10.07	5.7	6.31	0.73	2.43	-2.37965
chr15	77359687	77360187	intron (NM_005724, intron 1 of 6)	intron (NM_005724, intron 1 of 6)	3633	NM_001168412	10099	Hs.744863	NM_005724	ENSG00000140391	TSPAN3	TM4-A|TM4SF8|TSPAN-3	tetraspanin 3	protein-coding	2.75	2.27	1.38	10.29	12.62	12.63	18.04	2.72174
chr1	68643543	68644043	intron (NM_001193334, intron 1 of 10)	intron (NM_001193334, intron 1 of 10)	5500	NR_031664	100302279		NR_031664	ENSG00000221203	MIR1262	MIRN1262|hsa-mir-1262|mir-1262	microRNA 1262	ncRNA	0.92	1.46	2.37	12.5	13.45	7.14	7.63	2.6744
chr3	5740983	5741958	Intergenic	Intergenic	-449531	NR_039953	100616334		NR_039953	ENSG00000265180	MIR4790	-	microRNA 4790	ncRNA	6.42	1.94	3.65	11.08	17.29	16.11	18.91	2.32701
chr15	27724658	27725158	intron (NM_033223, intron 5 of 9)	intron (NM_033223, intron 5 of 9)	-318442	NR_120343	101928869	Hs.585699	NR_120343	ENSG00000228740	GABRG3-AS1	-	GABRG3 antisense RNA 1	ncRNA	13.02	18.93	6.22	2.53	1.1	2.38	1.04	-2.95351
chr13	95780237	95781038	intron (NM_001105515, intron 19 of 20)	intron (NM_001105515, intron 19 of 20)	168343	NR_047487	100861544	Hs.48706	NR_047487	ENSG00000260962	LINC00557	-	long intergenic non-protein coding RNA 557	ncRNA	6.6	4.37	5.14	37.51	17.56	19.04	31.92	2.48353
chr3	54356375	54356875	intron (NM_018398, intron 3 of 37)	MIRb|SINE|MIR	199932	NM_018398	55799	Hs.656687	NM_018398	ENSG00000157445	CACNA2D3	HSA272268	calcium voltage-gated channel auxiliary subunit alpha2delta 3	protein-coding	1.65	2.27	1.98	28.65	6.59	8.61	8.15	2.58848
chr16	54881069	54881569	non-coding (NR_134971, exon 2 of 2)	non-coding (NR_134971, exon 2 of 2)	826	NR_134971	101927480	Hs.499208	NR_134971	ENSG00000245694	LOC101927480	-	uncharacterized LOC101927480	ncRNA	10.46	25.56	4.44	0.95	1.65	3.11	2.26	-2.81671
chr6	86284926	86285426	intron (NM_001304479, intron 1 of 28)	Tigger6a|DNA|TcMar-Tigger	18698	NM_153816	57231	Hs.485871	NM_020468	ENSG00000135317	SNX14	RGS-PX2|SCAR20	sorting nexin 14	protein-coding	1.28	0.65	2.27	15.35	12.35	13.18	18.22	3.22133
chr7	89817594	89818094	intron (NR_110029, intron 2 of 2)	LTR38|LTR|ERV1	23105	NR_110029	100874100	Hs.573339	NR_110029	ENSG00000227646	STEAP2-AS1	-	STEAP2 antisense RNA 1	ncRNA	1.65	0.65	1.88	16.3	14.82	6.04	10.41	2.87462
chr20	11331038	11331538	Intergenic	Intergenic	-77257	NR_038972	339593	Hs.434320	NR_038972		LOC339593	-	uncharacterized LOC339593	ncRNA	11.19	18.44	4.44	1.9	2.47	2.2	2.26	-2.35854
chr8	86509055	86509555	Intergenic	MER57A1|LTR|ERV1	58600	NR_003594	100288527	Hs.535056	NR_003594		REXO1L2P	-	REX1, RNA exonuclease 1 homolog-like 2, pseudogene	pseudo	1.28	1.78	1.98	5.86	8.78	8.97	7.29	2.49355
chr16	34542957	34543457	Intergenic	Intergenic	-54580	NR_027080	283914	Hs.385772	NR_027079	ENSG00000259841	LINC01566	-	long intergenic non-protein coding RNA 1566	ncRNA	18.71	18.93	10.86	4.59	3.57	4.21	1.56	-2.34098
chr6	7975166	7975783	intron (NR_037616, intron 4 of 12)	intron (NR_037616, intron 4 of 12)	-10860	NR_027712	206426	Hs.676966	NR_027712		PIP5K1P1	-	phosphatidylinositol-4-phosphate 5-kinase type 1 pseudogene 1	pseudo	4.4	11.33	6.12	19.47	20.03	11.35	19.78	3.28982
chr6	9400067	9400567	Intergenic	Intergenic	747875	NR_004855	728655	Hs.214343	NR_004855	ENSG00000251164	HULC	HCCAT1|LINC00078|NCRNA00078	hepatocellular carcinoma up-regulated long non-coding RNA	ncRNA	1.28	0.65	1.48	9.34	8.78	6.23	5.38	2.68595
chr12	10513642	10514142	Intergenic	LTR9B|LTR|ERV1	-2476	NR_120430	101928100	Hs.638425	NR_120430	ENSG00000245648	LOC101928100	-	uncharacterized LOC101928100	ncRNA	22.75	31.87	6.72	4.59	4.94	2.38	3.99	-2.39522
chr4	175255638	175256138	Intergenic	MLT1H|LTR|ERVL-MaLR	-50486	NM_012180	26269	Hs.76917	NM_012180	ENSG00000164117	FBXO8	DC10|FBS|FBX8	F-box protein 8	protein-coding	9.36	9.22	5.14	1.58	1.65	2.01	1.73	-2.52145
chr6	145693689	145694189	Intergenic	MER57C2|LTR|ERV1	-362066	NR_038246	100507557	Hs.124537	NR_038244	ENSG00000235652	LOC100507557	-	uncharacterized LOC100507557	ncRNA	1.65	2.27	4.35	12.19	15.09	12.45	15.27	2.54359
chr5	79252155	79252655	intron (NR_131226, intron 2 of 2)	intron (NR_131226, intron 2 of 2)	20003	NR_131226	105616916	Hs.590325	NR_131226	ENSG00000250888	LINC01455	MDONA|TCONS_00009433	long intergenic non-protein coding RNA 1455	ncRNA	18.16	79.44	10.96	2.85	1.92	3.66	3.12	-3.41588
chr11	17994462	17994962	intron (NM_012139, intron 8 of 10)	intron (NM_012139, intron 8 of 10)	39997	NM_012139	26297	Hs.32470	NM_012139	ENSG00000129158	SERGEF	DELGEF|Gnefr	secretion regulating guanine nucleotide exchange factor	protein-coding	8.62	32.03	6.22	3.17	3.02	2.2	3.47	-2.36917
chr1	47077363	47077863	intron (NM_201403, intron 2 of 3)	intron (NM_201403, intron 2 of 3)	3192	NM_145279	148932	Hs.632401	NM_145279	ENSG00000142961	MOB3C	MOB1E|MOBKL2C	MOB kinase activator 3C	protein-coding	16.69	42.71	7.7	2.53	3.57	3.3	5.03	-2.50324
chr2	46872865	46873365	Intergenic	Intergenic	28804	NM_014171	9419	Hs.133998	NM_014171	ENSG00000119878	CRIPT	HSPC139|SSMDF	CXXC repeat containing interactor of PDZ3 domain	protein-coding	9.36	17.15	5.14	1.58	0.55	3.11	1.39	-2.52144
chr12	125564415	125564915	intron (NM_023928, intron 3 of 17)	intron (NM_023928, intron 3 of 17)	14752	NM_001319839	65985	Hs.656073	NM_023928	ENSG00000081760	AACS	ACSF1|SUR-5	acetoacetyl-CoA synthetase	protein-coding	14.12	22.16	6.22	1.58	2.47	0.73	2.95	-2.73215
chr6	141702208	141702708	Intergenic	Intergenic	697507	NR_039675	100616180		NR_039675	ENSG00000264390	MIR4465	-	microRNA 4465	ncRNA	2.2	0.65	1.48	11.24	12.9	10.62	11.8	2.89091
chr2	224873201	224873701	intron (NM_006216, intron 1 of 8)	intron (NM_006216, intron 1 of 8)	22744	NR_073116	5270	Hs.38449	NM_006216	ENSG00000135919	SERPINE2	GDN|GDNPF|PI-7|PI7|PN-1|PN1|PNI	serpin family E member 2	protein-coding	1.65	0.65	1.98	8.86	14.55	5.86	4.16	2.44955
chr6	96252955	96253455	Intergenic	Intergenic	-210640	NM_006581	10690	Hs.49117	NM_006581	ENSG00000172461	FUT9	Fuc-TIX	fucosyltransferase 9	protein-coding	1.1	0.81	2.17	14.88	15.37	10.44	14.92	3.08289
chr6	12343829	12344329	Intergenic	Intergenic	53550	NM_001955	1906	Hs.511899	NM_001955	ENSG00000078401	EDN1	ARCND3|ET1|HDLCQ7|PPET1|QME	endothelin 1	protein-coding	2.02	3.56	2.37	19.94	15.09	9.34	11.62	2.80187
chr3	161607899	161608399	Intergenic	LTR1D|LTR|ERV1	393553	NM_001080440	131149	Hs.585021	NM_001080440	ENSG00000182447	OTOL1	C1QTNF15	otolin 1	protein-coding	8.99	2.43	3.16	53.97	31.56	25.08	23.6	2.69112
chr1	213862487	213862987	Intergenic	Intergenic	-235355	NR_046189	100861504	Hs.742586	NR_046189		LINC00538	PROX1UT|Yiya	long intergenic non-protein coding RNA 538	ncRNA	19.63	34.95	8.99	2.53	3.84	2.56	1.91	-2.981
chr14	59800386	59800886	intron (NM_001270520, intron 15 of 24)	intron (NM_001270520, intron 15 of 24)	70477	NM_014992	23002	Hs.19156	NM_014992	ENSG00000100592	DAAM1	-	dishevelled associated activator of morphogenesis 1	protein-coding	7.89	16.5	4.74	2.37	1.92	1.46	2.08	-2.43074
chr18	45694239	45694739	intron (NM_001318841, intron 3 of 4)	intron (NM_001318841, intron 3 of 4)	-30809	NM_001039360	201501	Hs.515388	NM_001039360	ENSG00000184828	ZBTB7C	APM-1|APM1|ZBTB36|ZNF857C	zinc finger and BTB domain containing 7C	protein-coding	1.47	2.27	3.85	15.51	14.82	10.62	13.53	2.40372
chr13	87983360	87983860	Intergenic	Intergenic	287385	NR_039722	100616182		NR_039722	ENSG00000266052	MIR4500	-	microRNA 4500	ncRNA	8.25	15.53	6.62	1.42	2.47	0.37	2.26	-2.9937
chr14	56298680	56299180	Intergenic	Intergenic	-35538	NR_026797	645687	Hs.569345	NR_026796		LINC00520	C14orf34	long intergenic non-protein coding RNA 520	ncRNA	2.93	1.94	2.17	13.14	12.35	10.44	13.53	2.34214
chr3	124691290	124691790	intron (NM_020733, intron 16 of 16)	intron (NM_020733, intron 16 of 16)	-37945	NM_033049	56667	Hs.5940	NM_033049	ENSG00000173702	MUC13	DRCC1|MUC-13	mucin 13, cell surface associated	protein-coding	1.1	0.97	1.98	10.13	10.15	7.87	10.76	2.54036
chr7	71682047	71682547	intron (NM_001017440, intron 2 of 5)	intron (NM_001017440, intron 2 of 5)	119911	NM_001017440	83698	Hs.592750	NM_031468	ENSG00000183166	CALN1	CABP8	calneuron 1	protein-coding	13.21	26.37	6.91	3.32	3.02	2.2	2.6	-2.52379
chr10	62749064	62749564	intron (NR_024555, intron 1 of 11)	intron (NR_024555, intron 1 of 11)	11422	NR_024554	9886	Hs.737374	NM_014836	ENSG00000072422	RHOBTB1	-	Rho related BTB domain containing 1	protein-coding	1.65	3.56	3.16	10.92	13.72	8.06	23.6	2.50617
chr2	225876308	225876808	intron (NM_014689, intron 1 of 55)	intron (NM_014689, intron 1 of 55)	-1301	NR_039641	100616207		NR_039641	ENSG00000263828	MIR4439	-	microRNA 4439	ncRNA	9.17	15.05	5.33	1.11	1.65	1.28	1.21	-3.1937
chr14	35312269	35312769	intron (NM_013448, intron 3 of 26)	MLT1H2|LTR|ERVL-MaLR	32334	NM_182648	11177	Hs.509140	NM_013448	ENSG00000198604	BAZ1A	ACF1|WALp1|WCRF180|hACF1	bromodomain adjacent to zinc finger domain 1A	protein-coding	15.04	18.61	5.83	2.85	0.55	3.85	4.16	-2.34239
chr1	46684095	46684595	intron (NM_001013615, intron 1 of 1)	intron (NM_001013615, intron 1 of 1)	1632	NM_001243766	55624	Hs.525134	NM_017739	ENSG00000085998	POMGNT1	GNTI.2|GnT I.2|LGMD2O|MEB|MGAT1.2|RP76|gnT-I.2	protein O-linked mannose N-acetylglucosaminyltransferase 1 (beta 1,2-)	protein-coding	16.14	23.78	5.93	3.01	0.82	3.11	1.56	-2.78173
chr12	58424622	58425122	Intergenic	MLT1F|LTR|ERVL-MaLR	-56803	NR_135022	105369785	Hs.539353	NR_135022	ENSG00000257541	LOC105369785	-	uncharacterized LOC105369785	ncRNA	12.47	17.15	4.74	0.79	3.29	2.38	3.12	-2.49363
chr11	101591967	101592467	Intergenic	Intergenic	-137558	NM_004621	7225	Hs.159003	NM_004621	ENSG00000137672	TRPC6	FSGS2|TRP6	transient receptor potential cation channel subfamily C member 6	protein-coding	9.36	14.24	5.73	2.53	1.37	2.56	1.21	-2.459
chr11	113776791	113777713	intron (NM_006028, intron 1 of 8)	intron (NM_006028, intron 1 of 8)	1734	NM_006028	9177	Hs.241377	NM_006028	ENSG00000149305	HTR3B	5-HT3B	5-hydroxytryptamine receptor 3B	protein-coding	0.73	3.88	2.96	22.32	23.6	17.94	11.1	2.79376
chr11	128161619	128162119	Intergenic	Intergenic	230336	NM_005238	2113	Hs.369438	NM_005238	ENSG00000134954	ETS1	ETS-1|EWSR2|c-ets-1|p54	ETS proto-oncogene 1, transcription factor	protein-coding	2.2	1.62	1.78	13.14	12.35	6.96	11.1	2.64943
chr1	16107021	16107521	intron (NM_001024216, intron 4 of 4)	intron (NM_001024216, intron 4 of 4)	15812	NM_001024216	54751	Hs.530101	NM_017556	ENSG00000162458	FBLIM1	CAL|FBLP-1|FBLP1	filamin binding LIM protein 1	protein-coding	3.12	0.97	2.47	10.6	12.9	15.56	21.17	2.47942
chr18	43779433	43779933	intron (NM_145055, intron 1 of 4)	MLT2F|LTR|ERVL	25695	NM_145055	147339	Hs.116486	NM_145055	ENSG00000152242	C18orf25	ARKL1|RNF111L1	chromosome 18 open reading frame 25	protein-coding	1.83	2.1	1.78	14.72	6.04	6.77	14.23	2.38507
chr3	182478586	182479086	Intergenic	Intergenic	-32455	NM_014616	23200	Hs.478429	NM_014616	ENSG00000058063	ATP11B	ATPIF|ATPIR	ATPase phospholipid transporting 11B (putative)	protein-coding	2.02	1.62	1.58	13.45	7.14	9.89	11.28	2.46355
chr12	20183697	20184197	intron (NR_040098, intron 2 of 2)	intron (NR_040098, intron 2 of 2)	16328	NR_040098	100506393	Hs.658356	NR_040098	ENSG00000256287	LOC100506393	-	uncharacterized LOC100506393	ncRNA	1.47	1.29	0.99	14.4	10.43	3.66	9.37	2.69124
chr4	80956440	80956940	intron (NM_001145794, intron 8 of 15)	intron (NM_001145794, intron 8 of 15)	37787	NM_001145794	118429	Hs.162963	NM_058172	ENSG00000163297	ANTXR2	CMG-2|CMG2|HFS|ISH|JHF	anthrax toxin receptor 2	protein-coding	1.83	2.59	1.28	16.14	10.43	7.69	8.5	2.51889
chr2	225502933	225503718	Intergenic	Intergenic	-53212	NM_001257197	8452	Hs.372286	NM_003590	ENSG00000036257	CUL3	CUL-3|PHA2E	cullin 3	protein-coding	2.57	4.04	2.77	24.69	15.64	13.92	18.22	2.59579
chr1	43487180	43488017	Intergenic	Intergenic	-62752	NM_006516	6513	Hs.473721	NM_006516	ENSG00000117394	SLC2A1	CSE|DYT17|DYT18|DYT9|EIG12|GLUT|GLUT-1|GLUT1|GLUT1DS|HTLVR|PED|SDCHCN	solute carrier family 2 member 1	protein-coding	28.98	55.01	12.25	4.75	4.94	6.04	3.82	-2.41462
chr1	168082158	168082658	intron (NM_001267611, intron 1 of 5)	intron (NM_001267611, intron 1 of 5)	23266	NM_001267612	23432	Hs.271809	NM_007369	ENSG00000143147	GPR161	RE2	G protein-coupled receptor 161	protein-coding	7.15	23.62	4.25	1.42	1.65	1.65	2.43	-2.54933
chr1	119558149	119558649	Intergenic	L2a|LINE|L2	-14371	NR_135035	105378933	Hs.599652	NR_135034	ENSG00000226172	LOC105378933	-	uncharacterized LOC105378933	ncRNA	1.1	1.78	0.99	14.72	6.86	8.06	9.72	3.13677
chr7	143169286	143169786	intron (NR_033897, intron 2 of 4)	LTR14C|LTR|ERVK	-5430	NM_176883	259287	Hs.650648	NM_176883	ENSG00000221855	TAS2R41	T2R41|T2R59	taste 2 receptor member 41	protein-coding	4.59	4.04	2.77	19.79	17.56	17.21	26.02	2.38827
chr13	24422691	24423191	intron (NM_005932, intron 10 of 18)	intron (NM_005932, intron 10 of 18)	-40087	NM_001014442	542767	Hs.642624	NM_001014442		C1QTNF9B-AS1	PCOTH	C1QTNF9B antisense RNA 1	protein-coding	6.97	15.21	6.52	1.9	4.39	1.1	1.21	-2.48006
chr16	4995529	4996029	Intergenic	Intergenic	-8643	NM_002705	5493	Hs.192233	NM_002705	ENSG00000118898	PPL	-	periplakin	protein-coding	16.69	28.8	12.05	1.42	2.47	4.39	4.34	-2.57407
chr5	44002606	44003106	Intergenic	L2b|LINE|L2	385928	NM_004465	2255	Hs.248049	NM_004465	ENSG00000070193	FGF10	-	fibroblast growth factor 10	protein-coding	1.47	1.46	2.17	20.26	17.56	8.79	13.71	3.26538
chr13	103544824	103545324	intron (NR_026965, intron 3 of 3)	intron (NR_026965, intron 3 of 3)	12625	NR_026965	121952	Hs.660773	NR_026965	ENSG00000250878	METTL21EP	METTL21CP1	methyltransferase like 21E, pseudogene	pseudo	0.73	1.62	1.28	9.02	14.55	6.41	10.58	3.07836
chr7	121354559	121355387	Intergenic	Intergenic	-158186	NM_001206838	5803	Hs.489824	NM_002851	ENSG00000106278	PTPRZ1	HPTPZ|HPTPzeta|PTP-ZETA|PTP18|PTPRZ|PTPZ|R-PTP-zeta-2|RPTPB|RPTPbeta|phosphacan	protein tyrosine phosphatase, receptor type Z1	protein-coding	3.3	2.27	2.86	33.24	23.05	14.83	20.99	3.66537
chr7	55176950	55177450	promoter-TSS (NM_001346900)	promoter-TSS (NM_001346900)	-310	NM_001346900	1956	Hs.488293	NM_005228	ENSG00000146648	EGFR	ERBB|ERBB1|HER1|NISBD2|PIG61|mENA	epidermal growth factor receptor	protein-coding	25.13	15.69	5.23	3.8	2.47	2.56	1.56	-2.81899
chr15	79223138	79223638	intron (NM_004390, intron 7 of 11)	intron (NM_004390, intron 7 of 11)	14052	NM_004390	1512	Hs.148641	NM_004390	ENSG00000103811	CTSH	ACC-4|ACC-5|ACC4|ACC5|CPSB	cathepsin H	protein-coding	15.41	37.37	8	2.69	3.84	4.03	3.99	-2.44991
chr2	215971921	215972817	intron (NR_103740, intron 2 of 54)	intron (NR_103740, intron 2 of 54)	30782	NM_173076	26154	Hs.134585	NM_015657	ENSG00000144452	ABCA12	ARCI4A|ARCI4B|ICR2B|LI2	ATP binding cassette subfamily A member 12	protein-coding	16.88	35.27	11.85	3.17	4.67	3.66	5.55	-2.48012
chr13	108806624	108807124	Intergenic	Intergenic	60256	NM_002312	3981	Hs.166091	NM_002312	ENSG00000174405	LIG4	LIG4S	DNA ligase 4	protein-coding	1.47	1.78	2.17	34.35	26.35	19.96	18.74	3.79997
chr16	81801580	81802248	Intergenic	L1ME1|LINE|L1	-10949	NM_002661	5336	Hs.372303	NM_002661	ENSG00000197943	PLCG2	APLAID|FCAS3|PLC-IV|PLC-gamma-2	phospholipase C gamma 2	protein-coding	2.57	3.4	3.16	19.15	14	16.11	18.56	3.11525
chrX	6942864	6943364	Intergenic	Intergenic	-122179	NM_001320750	412	Hs.522578	NM_000351	ENSG00000101846	STS	ARSC|ARSC1|ASC|ES|SSDD|XLI	steroid sulfatase (microsomal), isozyme S	protein-coding	7.15	22.65	2.17	2.06	1.92	0	2.43	-2.70514
chr14	99782551	99783281	Intergenic	Intergenic	-44866	NM_001282237	64919	Hs.709690	NM_022898	ENSG00000127152	BCL11B	ATL1|ATL1-alpha|ATL1-beta|ATL1-delta|ATL1-gamma|CTIP-2|CTIP2|IMD49|RIT1|ZNF856B|hRIT1-alpha	B-cell CLL/lymphoma 11B	protein-coding	4.22	7.77	5.14	32.45	28.82	26	39.9	3.38536
chr18	12470645	12471145	intron (NM_001128626, intron 10 of 16)	intron (NM_001128626, intron 10 of 16)	38122	NR_136514	105371998	Hs.515283	NR_136514		LOC105371998	-	uncharacterized LOC105371998	ncRNA	9.17	15.05	4.94	1.74	2.2	2.56	1.91	-2.53131
chr4	103541700	103542506	Intergenic	Intergenic	-118460	NR_136202	105377621	Hs.15833	NR_136202		LOC105377621	-	uncharacterized LOC105377621	ncRNA	6.97	6.15	5.23	18.36	22.23	10.07	16.14	2.71241
chr6	103301098	103301776	Intergenic	MIR|SINE|MIR	1454576	NM_021956	2898	Hs.98262	NM_021956	ENSG00000164418	GRIK2	EAA4|GLR6|GLUK6|GLUR6|GluK2|MRT6	glutamate ionotropic receptor kainate type subunit 2	protein-coding	1.28	2.43	3.46	28.97	12.08	5.68	21.51	2.86767
chr15	89694088	89694588	intron (NM_152924, intron 3 of 10)	intron (NM_152924, intron 3 of 10)	62957	NM_152924	11057	Hs.122337	NM_007011	ENSG00000140526	ABHD2	HS1-2|LABH2|PHPS1-2	abhydrolase domain containing 2	protein-coding	2.75	4.04	1.78	16.3	11.25	14.65	19.95	2.65161
chr1	27317046	27317546	Intergenic	L2a|LINE|L2	-2899	NM_001013642	388610	Hs.355747	NM_001013642	ENSG00000253368	TRNP1	C1orf225|TNRP	TMF1-regulated nuclear protein 1	protein-coding	1.65	1.78	2.47	13.3	11.53	12.27	21.69	3.05298
chr8	7246893	7247393	Intergenic	Intergenic	-26653	NM_001164457	100131980	Hs.528391	NM_001164457	ENSG00000215372	ZNF705G	-	zinc finger protein 705G	protein-coding	0.92	1.13	1.19	9.5	11.53	7.14	8.15	3.16621
chr1	54559927	54560427	intron (NR_130900, intron 3 of 4)	L2b|LINE|L2	40425	NR_039942	100616315		NR_039942	ENSG00000116205	MIR4781	mir-4781	microRNA 4781	ncRNA	1.28	2.91	3.16	15.35	9.88	10.62	17.18	2.51135
chr10	61483776	61484276	Intergenic	Intergenic	-14189	NM_001323977	220963	Hs.499709	NM_194298	ENSG00000165449	SLC16A9	C10orf36|MCT9	solute carrier family 16 member 9	protein-coding	1.1	2.91	3.75	18.52	20.58	13.55	13.19	2.53523
chr15	39566204	39566704	Intergenic	Intergenic	23584	NM_001302797	400360	Hs.376109	NM_207445		C15orf54	-	chromosome 15 open reading frame 54	ncRNA	1.47	1.78	2.47	27.22	9.88	12.82	15.61	2.83566
chr2	230024740	230025448	intron (NM_001100818, intron 1 of 2)	MIRc|SINE|MIR	71714	NM_001330156	55022	Hs.745038	NM_017933	ENSG00000153823	PID1	HMFN2073|NYGGF4|P-CLI1|PCLI1	phosphotyrosine interaction domain containing 1	protein-coding	2.02	2.75	4.74	26.59	25.8	17.03	19.26	2.51292
chr17	66560603	66561269	intron (NM_017565, intron 1 of 10)	intron (NM_017565, intron 1 of 10)	-6368	NR_027751	54757	Hs.268874	NM_017565	ENSG00000108950	FAM20A	AI1G|AIGFS|FP2747	FAM20A, golgi associated secretory pathway pseudokinase	protein-coding	22.2	52.9	8.79	5.86	3.57	2.75	3.47	-3.35382
chr4	120086817	120087317	intron (NM_016599, intron 5 of 5)	intron (NM_016599, intron 5 of 5)	30128	NM_016599	51778	Hs.732122	NM_016599	ENSG00000172399	MYOZ2	C4orf5|CMH16|CS-1	myozenin 2	protein-coding	0.92	2.27	1.48	13.45	3.02	4.03	9.37	2.36916
chr14	68604371	68604871	intron (NM_001321809, intron 7 of 11)	Eulor6D|DNA?|DNA?	314312	NM_001321815	5890	Hs.172587	NM_002877	ENSG00000182185	RAD51B	R51H2|RAD51L1|REC2	RAD51 paralog B	protein-coding	18.53	36.08	5.33	2.22	3.29	1.83	2.6	-2.99026
chr12	84543870	84544370	Intergenic	AluJo|SINE|Alu	762488	NM_018057	55117	Hs.44424	NM_018057	ENSG00000072041	SLC6A15	NTT73|SBAT1|V7-3|hv7-3	solute carrier family 6 member 15	protein-coding	5.69	19.74	4.64	1.74	0.55	1.83	3.3	-2.41579
chr4	26828295	26828795	Intergenic	Intergenic	33321	NR_134675	105374546	Hs.548859	NR_134673		LOC105374546	-	uncharacterized LOC105374546	ncRNA	2.75	1.94	2.96	13.3	23.05	13.55	11.62	2.5573
chr2	46173083	46173583	intron (NM_005400, intron 2 of 14)	intron (NM_005400, intron 2 of 14)	294290	NM_005400	5581	Hs.580351	NM_005400	ENSG00000171132	PRKCE	PKCE|nPKC-epsilon	protein kinase C epsilon	protein-coding	1.28	2.91	2.86	15.2	9.33	7.32	17.18	2.47611
chr7	84158616	84159116	Intergenic	Intergenic	-2926	NR_110080	101927378	Hs.539042	NR_110079	ENSG00000235139	LOC101927378	-	uncharacterized LOC101927378	ncRNA	2.2	0.97	1.38	20.58	8.51	6.41	6.94	2.70424
chr2	167813122	167813622	intron (NM_001079810, intron 2 of 9)	MLT1J|LTR|ERVL-MaLR	68375	NM_152381	129446	Hs.73680	NM_152381	ENSG00000163092	XIRP2	CMYA3	xin actin binding repeat containing 2	protein-coding	1.47	0.32	1.19	12.98	8.78	9.7	9.89	3.08789
chr9	6779822	6780322	intron (NM_015061, intron 1 of 21)	intron (NM_015061, intron 1 of 21)	22431	NM_001304341	23081	Hs.709425	NM_015061	ENSG00000107077	KDM4C	GASC1|JHDM3C|JMJD2C|TDRD14C	lysine demethylase 4C	protein-coding	1.1	1.13	1.58	10.45	6.04	8.61	16.31	3.52297
chr3	173850163	173850663	intron (NM_014932, intron 4 of 6)	L2b|LINE|L2	-211827	NR_046664	100874010	Hs.624265	NR_046664	ENSG00000228213	NLGN1-AS1	-	NLGN1 antisense RNA 1	ncRNA	0.92	1.29	2.07	7.44	15.64	6.23	4.34	2.71695
chr5	14660346	14660846	Intergenic	AluJr4|SINE|Alu	-4158	NM_138348	90268	Hs.406335	NM_138348	ENSG00000154124	OTULIN	AIPDS|FAM105B|GUM	OTU deubiquitinase with linear linkage specificity	protein-coding	17.98	25.4	3.06	2.69	1.65	1.46	1.56	-3.14159
chr9	4497877	4498377	intron (NM_004170, intron 1 of 11)	intron (NM_004170, intron 1 of 11)	7700	NM_004170	6505	Hs.444915	NM_004170	ENSG00000106688	SLC1A1	DCBXA|EAAC1|EAAT3|SCZD18	solute carrier family 1 member 1	protein-coding	1.83	0.97	1.68	3.96	17.02	12.45	7.81	2.88511
chr7	110333334	110333834	intron (NM_001244606, intron 6 of 6)	L2a|LINE|L2	-397478	NM_001099658	54674	Hs.3781	NM_018334	ENSG00000173114	LRRN3	FIGLER5|NLRR-3|NLRR3	leucine rich repeat neuronal 3	protein-coding	2.57	1.62	1.68	12.66	21.68	6.59	5.03	2.69501
chr3	197121413	197121913	Intergenic	Intergenic	-95520	NM_001290983	1739	Hs.292549	NM_004087	ENSG00000075711	DLG1	DLGH1|SAP-97|SAP97|dJ1061C18.1.1|hdlg	discs large MAGUK scaffold protein 1	protein-coding	17.79	46.43	8.1	5.7	3.57	3.3	2.08	-2.46786
chr12	78513141	78513641	exon (NM_001024383, exon 15 of 40)	exon (NM_001024383, exon 15 of 40)	240135	NR_135021	105369860	Hs.156898	NR_135021	ENSG00000258220	LOC105369860	-	uncharacterized LOC105369860	ncRNA	7.89	15.05	5.53	1.74	0.27	2.01	2.26	-2.65861
chr10	50279221	50279721	intron (NM_001031746, intron 4 of 7)	intron (NM_001031746, intron 4 of 7)	44106	NM_144984	196740	Hs.522928	NM_144984	ENSG00000165633	VSTM4	C10orf72	V-set and transmembrane domain containing 4	protein-coding	14.12	26.86	8.1	1.9	3.29	3.48	3.64	-2.47108
chr11	57446820	57447320	intron (NM_015457, intron 2 of 11)	intron (NM_015457, intron 2 of 11)	11596	NM_015457	25921	Hs.27239	NM_015457	ENSG00000156599	ZDHHC5	DHHC5|ZNF375	zinc finger DHHC-type containing 5	protein-coding	17.61	27.02	7.21	1.27	0.55	3.3	2.78	-2.95045
chr2	64713107	64713607	Intergenic	Intergenic	32030	NM_014181	29094	Hs.372208	NM_014181	ENSG00000119862	LGALSL	GRP|HSPC159	galectin like	protein-coding	7.15	26.21	4.44	1.11	1.65	2.2	3.64	-2.36478
chr8	120779826	120780326	intron (NM_003184, intron 18 of 25)	L1PA15-16|LINE|L1	64998	NM_003184	6873	Hs.122752	NM_003184	ENSG00000064313	TAF2	CIF150|MRT40|TAF2B|TAFII150	TATA-box binding protein associated factor 2	protein-coding	3.67	10.35	4.94	40.36	33.48	30.39	27.24	2.61007
chr9	1462464	1463144	Intergenic	Intergenic	412184	NM_181872	10655	Hs.59506	NM_006557	ENSG00000173253	DMRT2	-	doublesex and mab-3 related transcription factor 2	protein-coding	4.4	4.53	5.43	11.87	18.39	22.34	18.04	2.38016
chr6	114140560	114141060	Intergenic	Intergenic	-37704	NM_002356	4082	Hs.519909	NM_002356	ENSG00000277443	MARCKS	80K-L|MACS|PKCSL|PRKCSL	myristoylated alanine rich protein kinase C substrate	protein-coding	1.47	0.32	0.79	5.7	10.98	9.52	7.11	2.83647
chr8	4195704	4196204	intron (NM_033225, intron 3 of 69)	intron (NM_033225, intron 3 of 69)	656374	NM_033225	64478	Hs.571466	NM_033225	ENSG00000183117	CSMD1	PPP1R24	CUB and Sushi multiple domains 1	protein-coding	0.92	0.97	1.68	34.35	30.46	21.97	27.24	4.4546
chr1	25494882	25495382	Intergenic	LTR22B|LTR|ERVK	63881	NM_015484	25949	Hs.20013	NM_015484	ENSG00000117614	SYF2	CBPIN|NTC31|P29|fSAP29	SYF2 pre-mRNA splicing factor	protein-coding	0.92	1.46	1.58	8.07	9.33	11.17	9.37	3.05145
chr9	121181501	121182001	Intergenic	Intergenic	715298	NM_138554	7099	Hs.174312	NM_003266	ENSG00000136869	TLR4	ARMD10|CD284|TLR-4|TOLL	toll like receptor 4	protein-coding	0	1.29	2.67	4.75	1.65	9.89	13.53	2.32488
chr18	3051601	3052448	Intergenic	AluSz6|SINE|Alu	-40080	NM_014646	9663	Hs.132342	NM_014646	ENSG00000101577	LPIN2	-	lipin 2	protein-coding	4.95	4.53	3.26	17.89	18.66	13.55	22.21	2.34421
chr16	69430505	69431005	Intergenic	Intergenic	-10864	NM_005652	7014	Hs.63335	NM_005652	ENSG00000132604	TERF2	TRBF2|TRF2	telomeric repeat binding factor 2	protein-coding	0.73	1.46	1.38	12.5	7.68	9.15	11.45	3.14038
chr12	38518141	38518641	Intergenic	HERVK11D-int|LTR|ERVK	-192166	NM_001308340	144245	Hs.259305	NM_001013620	ENSG00000175548	ALG10B	ALG10|KCR1	ALG10B, alpha-1,2-glucosyltransferase	protein-coding	1.47	2.59	0.69	17.73	12.62	8.24	11.45	2.96722
chr2	226336162	226336662	intron (NM_020864, intron 2 of 5)	MIRb|SINE|MIR	70810	NM_020864	57624	Hs.224409	NM_020864	ENSG00000144460	NYAP2	KIAA1486	neuronal tyrosine-phosphorylated phosphoinositide-3-kinase adaptor 2	protein-coding	2.93	0.81	2.17	21.05	18.94	8.97	8.5	2.53942
chr13	106781634	106782134	Intergenic	Intergenic	-247027	NR_034119	728192	Hs.559194	NR_034119		LINC00460	-	long intergenic non-protein coding RNA 460	ncRNA	1.1	0.65	1.78	18.68	9.06	7.32	22.21	3.41667
chr11	39511584	39512084	Intergenic	Intergenic	802846	NR_047674	57689	Hs.745123	NM_020929	ENSG00000148948	LRRC4C	NGL-1|NGL1	leucine rich repeat containing 4C	protein-coding	1.65	0.65	2.86	15.99	4.67	17.76	13.53	2.61906
chr5	22649200	22649700	intron (NM_004061, intron 1 of 14)	MIRb|SINE|MIR	204281	NM_004061	1010	Hs.113684	NM_004061	ENSG00000154162	CDH12	CDHB	cadherin 12	protein-coding	2.57	3.88	2.37	23.11	22.23	13.73	15.09	2.62109
chr13	28123383	28124098	intron (NM_153371, intron 9 of 9)	MIR|SINE|MIR	70979	NM_153371	222484	Hs.132359	NM_153371	ENSG00000139517	LNX2	PDZRN1	ligand of numb-protein X 2	protein-coding	1.28	2.1	2.86	21.37	14.82	16.48	18.74	3.77351
chr5	157987212	157987712	Intergenic	Intergenic	-150681	NR_109888	101927697	Hs.483960	NR_109888	ENSG00000276778	LOC101927697	-	uncharacterized LOC101927697	ncRNA	2.2	2.91	2.57	35.93	12.35	15.38	17.35	3.15202
chr1	18643196	18643696	intron (NM_032880, intron 3 of 9)	L2a|LINE|L2	-163978	NM_152375	127707	Hs.406913	NM_152375	ENSG00000179023	KLHDC7A	-	kelch domain containing 7A	protein-coding	1.28	3.72	2.37	12.82	4.39	15.2	26.54	2.82785
chr2	223397004	223397504	intron (NM_152386, intron 4 of 4)	intron (NM_152386, intron 4 of 4)	108028	NM_001320833	130367	Hs.210043	NM_152386	ENSG00000163082	SGPP2	SPP2|SPPase2	sphingosine-1-phosphate phosphatase 2	protein-coding	12.66	21.19	8.2	2.53	4.94	2.01	2.6	-2.48625
chrX	78580682	78581182	Intergenic	L1P3|LINE|L1	42117	NM_004867	9452	Hs.17109	NM_004867	ENSG00000078596	ITM2A	BRICD2A|E25A	integral membrane protein 2A	protein-coding	1.28	4.04	1.48	15.99	8.23	5.86	8.15	2.37481
chr2	178171196	178171696	intron (NR_026966, intron 8 of 8)	intron (NR_026966, intron 8 of 8)	7164	NR_106767	102465255		NR_106767	ENSG00000278418	MIR6512	hsa-mir-6512|mir-6512	microRNA 6512	ncRNA	10.27	12.3	3.85	0.32	1.65	2.75	1.04	-2.58234
chr7	142640875	142641375	intron (NM_000420, intron 13 of 18)	intron (NM_000420, intron 13 of 18)	4522	NM_178829	135927	Hs.239676	NM_178829	ENSG00000165131	C7orf34	ctm-1	chromosome 7 open reading frame 34	protein-coding	19.99	37.7	11.36	6.65	3.57	4.39	2.78	-2.39324
chr1	81918949	81919449	Intergenic	Intergenic	104188	NR_125943	101927434	Hs.130394	NR_125943	ENSG00000234953	LOC101927434	-	uncharacterized LOC101927434	ncRNA	2.75	0.97	2.07	16.46	16.74	6.96	8.5	2.3684
chr9	79249248	79250175	intron (NM_001330680, intron 7 of 10)	intron (NM_001330680, intron 7 of 10)	57619	NM_001330680	158471	Hs.262857	NM_015225	ENSG00000106772	PRUNE2	BMCC1|BNIPXL|C9orf65|KIAA0367	prune homolog 2	protein-coding	2.57	2.43	4.94	36.25	30.74	21.24	37.3	3.30825
chr1	15528536	15529036	intron (NM_018022, intron 1 of 2)	intron (NM_018022, intron 1 of 2)	-30666	NM_001278502	727684	Hs.667584	NM_001278501		C1orf195	-	chromosome 1 open reading frame 195	protein-coding	2.57	1.78	2.57	16.3	20.86	15.38	13.36	2.8022
chr6	121364302	121365246	Intergenic	HERVK11D-int|LTR|ERVK	290872	NR_104452	221322	Hs.121396	NM_152730	ENSG00000146350	TBC1D32	BROMI|C6orf170|C6orf171|bA301B7.2|bA57L9.1|dJ310J6.1	TBC1 domain family member 32	protein-coding	5.87	4.85	5.53	37.99	38.7	19.04	33.66	3.13913
chr14	65768601	65769101	Intergenic	MER89|LTR|ERV1	33050	NR_039857	100616176		NR_039857	ENSG00000266740	MIR4708	mir-4708	microRNA 4708	ncRNA	2.02	5.5	2.67	14.72	17.02	8.61	23.77	2.50815
chr10	69251998	69252743	intron (NM_001127384, intron 5 of 17)	L2a|LINE|L2	-89203	NR_106973	102466814		NR_106973	ENSG00000276866	MIR7151	hsa-mir-7151	microRNA 7151	ncRNA	2.38	1.62	2.77	22.95	26.07	17.39	18.56	2.95523
chr18	9638754	9639254	Intergenic	Intergenic	23742	NR_110774	101927323	Hs.151204	NR_110773	ENSG00000263627	PPP4R1-AS1	-	PPP4R1 antisense RNA 1	ncRNA	7.52	22.33	6.42	1.58	1.92	2.93	3.47	-2.38856
chr7	78922883	78923383	intron (NM_001301128, intron 1 of 20)	L2b|LINE|L2	-159140	NR_038346	100505881	Hs.31474	NR_038343	ENSG00000234456	MAGI2-AS3	-	MAGI2 antisense RNA 3	ncRNA	1.83	2.91	2.27	37.51	26.07	18.13	26.89	3.57281
chr15	90572257	90572757	intron (NM_198526, intron 1 of 4)	intron (NM_198526, intron 1 of 4)	22520	NR_036135	100422841		NR_036135	ENSG00000265871	MIR3174	-	microRNA 3174	ncRNA	1.83	1.46	1.88	13.3	6.31	9.7	11.1	2.4187
chr15	89158452	89158952	Intergenic	Intergenic	-3547	NR_039867	100616238		NR_039867	ENSG00000283484	MIR3529	mir-3529	microRNA 3529	ncRNA	1.65	1.29	1.38	7.28	12.08	13.73	13.19	3.24927
chr4	5774914	5775414	intron (NM_153717, intron 11 of 20)	MLT1H|LTR|ERVL-MaLR	62240	NM_001306090	2121	Hs.646899	NM_014556	ENSG00000072840	EVC	DWF-1|EVC1|EVCL	EvC ciliary complex subunit 1	protein-coding	17.79	25.89	8.69	3.01	4.39	3.48	2.08	-2.72198
chr14	65693831	65694331	Intergenic	Intergenic	-5016	NR_103769	100128233	Hs.497323	NR_103769	ENSG00000255002	LOC100128233	-	uncharacterized LOC100128233	ncRNA	3.85	6.63	3.36	21.05	11.25	25.63	32.79	2.38318
chr15	38194269	38194769	Intergenic	MER5B|DNA|hAT-Charlie	-32289	NM_001330255	145942	Hs.179646	NM_152453	ENSG00000166069	TMCO5A	TMCO5	transmembrane and coiled-coil domains 5A	protein-coding	2.75	0.65	1.19	25.33	13.72	7.32	11.45	3.14137
chr6	28915609	28916109	Intergenic	Intergenic	4298	NR_103538	729583	Hs.453549	NR_103538		LINC01556	C6orf100|dJ25J6.5	long intergenic non-protein coding RNA 1556	ncRNA	3.49	2.27	2.57	13.45	10.43	11.72	18.22	2.56793
chr5	93621756	93622256	intron (NM_001145678, intron 20 of 20)	L2c|LINE|L2	-174602	NM_001163418	83989	Hs.600086	NM_032042	ENSG00000113391	FAM172A	C5orf21	family with sequence similarity 172 member A	protein-coding	2.93	1.46	2.27	25.33	10.43	4.21	10.41	2.38854
chr8	42147710	42148210	intron (NM_001556, intron 4 of 21)	intron (NM_001556, intron 4 of 21)	19140	NR_033818	3551	Hs.597664	NM_001556	ENSG00000104365	IKBKB	IKK-beta|IKK2|IKKB|IMD15|NFKBIKB	inhibitor of nuclear factor kappa B kinase subunit beta	protein-coding	26.6	55.66	9.78	4.12	4.12	4.39	5.2	-2.49418
chr12	47377201	47378145	Intergenic	L1PA8|LINE|L1	-95713	NM_001281429	91523	Hs.560100	NM_138371	ENSG00000179715	PCED1B	FAM113B	PC-esterase domain containing 1B	protein-coding	17.61	34.46	14.72	9.34	7.14	6.77	9.2	-2.48057
chr11	107279391	107279891	intron (NM_152434, intron 10 of 17)	intron (NM_152434, intron 10 of 17)	48931	NM_152434	143884	Hs.212140	NM_152434	ENSG00000152404	CWF19L2	-	CWF19-like 2, cell cycle control (S. pombe)	protein-coding	1.28	1.46	0.59	10.13	15.37	5.68	5.2	3.31763
chr2	208103878	208104378	intron (NR_110283, intron 2 of 3)	intron (NR_110283, intron 2 of 3)	14912	NR_110283	101927865	Hs.574609	NR_110283		LOC101927865	-	uncharacterized LOC101927865	ncRNA	14.31	31.06	7.41	3.96	3.29	3.66	2.6	-2.39932
chr1	100045928	100046428	Intergenic	Intergenic	-65253	NM_017734	54873	Hs.483993	NM_017734	ENSG00000099260	PALMD	C1orf11|PALML	palmdelphin	protein-coding	22.38	49.51	10.96	4.12	2.74	2.38	5.03	-2.95194
chr5	98621241	98621741	Intergenic	MLT1F2|LTR|ERVL-MaLR	-248203	NR_110562	102724855	Hs.519477	NR_110562		LINC02113	CTD-2151A2.1	long intergenic non-protein coding RNA 2113	ncRNA	2.02	0.97	1.58	30.55	4.67	4.03	6.42	2.59705
chr3	184208712	184209212	Intergenic	Intergenic	65744	NR_046593	100874079	Hs.574899	NR_046593	ENSG00000230215	LINC01840	EIF2B5-AS1	long intergenic non-protein coding RNA 1840	ncRNA	3.12	3.88	3.56	17.41	13.45	21.06	22.03	2.57473
chr1	204270232	204270732	intron (NM_014935, intron 1 of 22)	intron (NM_014935, intron 1 of 22)	58575	NM_014935	22874	Hs.253146	NM_014935	ENSG00000143850	PLEKHA6	PEPP-3|PEPP3	pleckstrin homology domain containing A6	protein-coding	11.19	25.24	5.14	1.27	3.29	0.55	2.78	-2.69995
chr2	37048386	37048886	Intergenic	Intergenic	124803	NM_001177969	5212	Hs.137415	NM_053276	ENSG00000205221	VIT	-	vitrin	protein-coding	0.92	4.53	2.37	10.13	26.9	11.72	9.02	2.44955
chr20	49511637	49512137	intron (NM_015339, intron 4 of 4)	Tigger3|DNA|TcMar-Tigger	14441	NM_001282532	23394	Hs.293736	NM_015339	ENSG00000101126	ADNP	ADNP1|HVDAS|MRD28	activity dependent neuroprotector homeobox	protein-coding	1.1	0.97	1.09	13.61	8.78	10.07	10.41	3.34554
chr5	56731400	56731900	Intergenic	Intergenic	46986	NM_001017992	345651	Hs.482167	NM_001017992	ENSG00000169067	ACTBL2	ACT	actin, beta like 2	protein-coding	0.92	0.81	1.98	12.82	14.27	11.35	14.57	3.21205
chr1	208111305	208111805	Intergenic	MER57C2|LTR|ERV1	-26872	NM_001773	947	Hs.374990	NM_001773	ENSG00000174059	CD34	-	CD34 molecule	protein-coding	2.2	1.94	1.28	9.97	7.96	8.79	12.67	2.36499
chr11	120765257	120765757	promoter-TSS (NR_132790)	promoter-TSS (NR_132790)	-1	NR_132790	101929227	Hs.627156	NR_132790	ENSG00000250493	LOC101929227	-	uncharacterized LOC101929227	ncRNA	7.34	33.81	5.04	1.9	2.2	2.38	2.6	-2.406
chr10	2369231	2369731	Intergenic	Intergenic	-12213	NR_038884	399708	Hs.521270	NR_038884		LINC00701	-	long intergenic non-protein coding RNA 701	ncRNA	0.73	1.94	2.77	5.86	9.61	14.46	13.53	2.56365
chr2	114779802	114780302	Intergenic	MLT2C2|LTR|ERVL	-42491	NR_034130	100499194	Hs.662336	NR_034130		LOC100499194	-	uncharacterized LOC100499194	ncRNA	2.2	2.43	2.67	13.93	10.15	13.92	13.88	2.47962
chr3	169107250	169107929	intron (NM_004991, intron 1 of 16)	intron (NM_004991, intron 1 of 16)	-58065	NR_134932	105374205		NR_134932	ENSG00000241479	LOC105374205	-	uncharacterized LOC105374205	ncRNA	2.75	2.43	4.44	16.78	20.86	19.23	21.51	2.35369
chr4	175547412	175548179	Intergenic	Intergenic	-103747	NM_000860	3248	Hs.596913	NM_000860	ENSG00000164120	HPGD	15-PGDH|PGDH|PGDH1|PHOAR1|SDR36C1	hydroxyprostaglandin dehydrogenase 15-(NAD)	protein-coding	2.38	1.94	3.16	29.76	19.49	13	12.67	2.95298
chr3	89228743	89229243	intron (NM_182644, intron 2 of 6)	intron (NM_182644, intron 2 of 6)	72319	NM_182644	2042	Hs.123642	NM_005233	ENSG00000044524	EPHA3	EK4|ETK|ETK1|HEK|HEK4|TYRO4	EPH receptor A3	protein-coding	12.66	7.77	4.05	1.74	1.37	0.92	2.26	-2.77684
chr18	72148203	72148703	Intergenic	Intergenic	-15047	NM_018235	55748	Hs.149185	NM_018235	ENSG00000133313	CNDP2	CN2|CPGL|HEL-S-13|HsT2298|PEPA	CNDP dipeptidase 2 (metallopeptidase M20 family)	protein-coding	1.65	1.29	1.28	23.58	18.66	10.62	17.52	3.9831
chr16	81678920	81679420	intron (NM_030629, intron 3 of 20)	intron (NM_030629, intron 3 of 20)	-19789	NR_045112	100129617	Hs.657151	NR_045112		LOC100129617	-	uncharacterized LOC100129617	ncRNA	11.92	63.26	7.51	3.8	6.04	2.56	2.43	-2.71734
chr2	118843196	118843696	Intergenic	Intergenic	-2548	NM_001321330	51141	Hs.7089	NM_016133	ENSG00000125629	INSIG2	INSIG-2	insulin induced gene 2	protein-coding	1.28	0.97	1.38	11.24	11.8	5.68	8.15	2.86577
chr7	7139979	7140479	Intergenic	Intergenic	-3812	NR_034022	100131257	Hs.551110	NR_034022		LOC100131257	-	zinc finger protein 655 pseudogene	pseudo	18.16	31.55	8.39	1.42	3.57	4.03	2.08	-3.1333
chr1	236635860	236636360	intron (NM_145861, intron 5 of 5)	MIRb|SINE|MIR	-45404	NM_201545	3964	Hs.4082	NM_006499	ENSG00000116977	LGALS8	Gal-8|PCTA-1|PCTA1|Po66-CBP	galectin 8	protein-coding	7.7	30.58	6.02	2.06	0.55	3.3	2.78	-2.64864
chr20	22597677	22598177	Intergenic	Intergenic	-9772	NR_109883	101929685	Hs.563018	NR_109883	ENSG00000237396	LINC01384	-	long intergenic non-protein coding RNA 1384	ncRNA	2.57	2.75	4.15	24.22	25.52	21.97	19.95	2.78416
chr3	7369983	7370483	intron (NM_000844, intron 4 of 9)	MLT1J|LTR|ERVL-MaLR	206738	NR_046606	100873937	Hs.570608	NR_046606	ENSG00000236202	GRM7-AS1	-	GRM7 antisense RNA 1	ncRNA	2.02	2.43	3.16	13.77	19.76	13.92	12.14	2.59838
chr12	10813865	10814365	intron (NM_018423, intron 1 of 10)	intron (NM_018423, intron 1 of 10)	12776	NM_018423	55359	Hs.24979	NM_018423	ENSG00000060140	STYK1	NOK|SuRTK106	serine/threonine/tyrosine kinase 1	protein-coding	3.12	0.97	1.88	19.94	24.97	8.61	12.32	2.76595
chr1	180126834	180127334	intron (NM_001004128, intron 1 of 12)	intron (NM_001004128, intron 1 of 12)	3116	NM_001004128	5768	Hs.744925	NM_002826	ENSG00000116260	QSOX1	Q6|QSCN6	quiescin sulfhydryl oxidase 1	protein-coding	2.02	3.07	4.05	21.84	23.88	14.65	19.08	2.87865
chr3	36961211	36961711	intron (NM_001329998, intron 1 of 23)	intron (NM_001329998, intron 1 of 23)	25087	NM_001329998	9881	Hs.170999	NM_014831	ENSG00000168016	TRANK1	LBA1	tetratricopeptide repeat and ankyrin repeat containing 1	protein-coding	1.83	1.62	0.89	14.4	12.35	11.54	7.98	3.25636
chr16	80299536	80300036	intron (NR_120307, intron 2 of 5)	intron (NR_120307, intron 2 of 5)	-274845	NM_001305017	83657	Hs.98849	NM_130897	ENSG00000168589	DYNLRB2	DNCL2B|DNLC2B|ROBLD2	dynein light chain roadblock-type 2	protein-coding	1.28	2.59	2.27	8.39	9.88	11.17	11.62	2.32514
chr6	134378599	134379099	Intergenic	Intergenic	-5060	NM_145176	154091	Hs.486508	NM_145176	ENSG00000146411	SLC2A12	GLUT12|GLUT8	solute carrier family 2 member 12	protein-coding	14.12	19.25	2.57	1.27	1.65	0.73	1.56	-3.16096
chr10	88373629	88374129	Intergenic	Intergenic	-40435	NM_001030015	94233	Hs.283922	NM_033282	ENSG00000122375	OPN4	MOP	opsin 4	protein-coding	12.84	22.97	5.53	2.06	3.29	2.75	2.6	-2.39257
chr16	78282959	78283459	intron (NM_001291997, intron 4 of 7)	intron (NM_001291997, intron 4 of 7)	149899	NM_001291997	51741	Hs.461453	NM_016373	ENSG00000186153	WWOX	D16S432E|EIEE28|FOR|FRA16D|HHCMA56|PRO0128|SCAR12|SDR41C1|WOX1	WW domain containing oxidoreductase	protein-coding	2.2	5.02	1.48	14.56	16.47	6.59	7.98	2.4136
chr2	31526007	31526507	Intergenic	Intergenic	69377	NM_014600	30845	Hs.368808	NM_014600	ENSG00000013016	EHD3	PAST3	EH domain containing 3	protein-coding	16.14	28.8	6.42	3.48	2.2	3.3	4.16	-2.37562
chr5	83074927	83075427	Intergenic	MSTD|LTR|ERVL-MaLR	-58281	NM_001884	1404	Hs.2799	NM_001884	ENSG00000145681	HAPLN1	CRT1|CRTL1	hyaluronan and proteoglycan link protein 1	protein-coding	1.1	2.1	2.37	20.74	22.5	17.94	23.25	3.84201
chr15	96714076	96714576	intron (NR_125738, intron 3 of 4)	intron (NR_125738, intron 3 of 4)	-154831	NM_001145155	7026	Hs.347991	NM_021005	ENSG00000185551	NR2F2	ARP1|CHTD4|COUPTFB|COUPTFII|NF-E3|NR2F1|SVP40|TFCOUP2	nuclear receptor subfamily 2 group F member 2	protein-coding	2.2	0.97	0.79	10.76	14	5.31	6.07	2.77712
chr17	4090354	4090854	intron (NR_047571, intron 10 of 23)	intron (NR_047571, intron 10 of 23)	43689	NM_001254755	124936	Hs.513871	NM_144611	ENSG00000167740	CYB5D2	-	cytochrome b5 domain containing 2	protein-coding	12.84	30.74	3.65	0.32	4.12	1.28	3.3	-2.58974
chr3	89523560	89524060	intron (NM_005233, intron 16 of 16)	intron (NM_005233, intron 16 of 16)	367136	NM_182644	2042	Hs.123642	NM_005233	ENSG00000044524	EPHA3	EK4|ETK|ETK1|HEK|HEK4|TYRO4	EPH receptor A3	protein-coding	1.28	0.32	1.09	23.58	2.47	4.03	10.06	3.33178
chr10	14596024	14596524	intron (NM_001282695, intron 2 of 5)	intron (NM_001282695, intron 2 of 5)	1905	NM_001320738	83641	Hs.446315	NM_031453	ENSG00000065809	FAM107B	C10orf45|HITS	family with sequence similarity 107 member B	protein-coding	3.12	5.66	3.16	17.57	21.68	15.75	26.54	2.49322
chr8	122438989	122439489	Intergenic	Intergenic	-212347	NR_002835	594842	Hs.668686	NR_002835		HAS2-AS1	HAS2-AS|HAS2AS|HASNT|NCRNA00077	HAS2 antisense RNA 1	ncRNA	1.28	5.02	2.37	20.42	14	7.87	8.5	2.35412
chr18	6476836	6477336	Intergenic	Intergenic	-34329	NR_120518	100130480	Hs.646267	NM_001243517	ENSG00000265944	LINC01387	C18orf64	long intergenic non-protein coding RNA 1387	ncRNA	15.78	32.52	4.84	3.8	1.92	3.3	3.3	-2.37984
chr8	2274823	2275323	Intergenic	L2c|LINE|L2	205380	NR_125423	101927815	Hs.571467	NR_125423	ENSG00000254319	LOC101927815	-	uncharacterized LOC101927815	ncRNA	3.3	1.62	3.56	26.28	16.47	25.45	30.88	2.86642
chr7	17245817	17246317	Intergenic	MIRb|SINE|MIR	-92209	NM_001621	196	Hs.171189	NM_001621	ENSG00000106546	AHR	bHLHe76	aryl hydrocarbon receptor	protein-coding	2.02	1.29	1.19	4.75	10.15	10.25	16.83	2.80581
chr16	47808498	47808998	Intergenic	L1P2|LINE|L1	-83744	NR_110650	101927132	Hs.589404	NR_110650	ENSG00000261231	LINC02133	-	long intergenic non-protein coding RNA 2133	ncRNA	2.02	3.56	2.86	13.14	10.98	10.44	12.84	2.3302
chr9	80204293	80204793	intron (NM_004297, intron 1 of 6)	intron (NM_004297, intron 1 of 6)	58689	NM_004297	9630	Hs.657795	NM_004297	ENSG00000156049	GNA14	-	G protein subunit alpha 14	protein-coding	4.4	4.69	2.77	20.1	22.23	16.3	27.59	2.38456
chr2	23350303	23350803	Intergenic	Intergenic	-257745	NM_052920	114818	Hs.130593	NM_025067	ENSG00000119771	KLHL29	KBTBD9	kelch like family member 29	protein-coding	2.57	1.94	2.96	46.38	51.32	23.25	31.92	3.73168
chr1	165614978	165615631	intron (NM_004528, intron 1 of 5)	intron (NM_004528, intron 1 of 5)	15195	NM_004528	4259	Hs.191734	NM_004528	ENSG00000143198	MGST3	GST-III	microsomal glutathione S-transferase 3	protein-coding	3.12	4.53	2.77	34.98	38.42	22.16	33.48	2.69818
chr2	106002209	106002709	intron (NM_001318899, intron 3 of 7)	intron (NM_001318899, intron 3 of 7)	13116	NM_001039492	2274	Hs.443687	NM_001450	ENSG00000115641	FHL2	AAG11|DRAL|FHL-2|SLIM-3|SLIM3	four and a half LIM domains 2	protein-coding	2.38	3.07	2.96	15.35	17.02	13.18	20.47	2.87181
chr2	155304153	155304653	intron (NM_001301627, intron 11 of 11)	LTR87|LTR|ERVL?	9547	NM_001256368	100144595	Hs.683952	NM_001256368		LOC100144595	-	uncharacterized LOC100144595	protein-coding	1.47	0.97	1.58	16.62	11.25	4.39	7.11	2.67591
chr3	30330725	30331225	Intergenic	Intergenic	-317019	NM_001024847	7048	Hs.82028	NM_003242	ENSG00000163513	TGFBR2	AAT3|FAA3|LDS1B|LDS2|LDS2B|MFS2|RIIC|TAAD2|TGFR-2|TGFbeta-RII	transforming growth factor beta receptor 2	protein-coding	1.83	0.97	1.19	10.6	6.59	5.86	8.85	2.33407
chr8	49991186	49991686	Intergenic	L2a|LINE|L2	6536	NM_001256597	492307	Hs.49890	NM_001007176	ENSG00000168333	C8orf22	-	chromosome 8 open reading frame 22	protein-coding	1.47	3.07	2.27	18.68	10.43	10.62	7.81	3.1912
chr12	63154462	63154962	intron (NM_020700, intron 4 of 9)	intron (NM_020700, intron 4 of 9)	157246	NR_029661	406891		NR_029661	ENSG00000199179	MIRLET7I	LET7I|MIRNLET7I|hsa-let-7i|let-7i	microRNA let-7i	ncRNA	1.65	1.46	1.78	17.41	11.53	6.77	7.29	2.547
chr17	55059685	55060185	intron (NM_021626, intron 2 of 12)	intron (NM_021626, intron 2 of 12)	4467	NM_021626	59342	Hs.514950	NM_021626	ENSG00000121064	SCPEP1	HSCP1|RISC	serine carboxypeptidase 1	protein-coding	8.44	15.86	4.54	0.79	2.47	2.38	1.04	-2.53103
chr13	70998583	70999083	Intergenic	LTR9|LTR|ERV1	-316208	NM_001286725	57626	Hs.508201	NM_020866	ENSG00000150361	KLHL1	MRP2	kelch like family member 1	protein-coding	1.65	0.97	1.88	14.56	13.17	5.68	12.49	2.64365
chrX	123343612	123344112	Intergenic	L2a|LINE|L2	-136270	NM_002351	4068	Hs.349094	NM_002351	ENSG00000183918	SH2D1A	DSHP|EBVS|IMD5|LYP|MTCP1|SAP|SAP/SH2D1A|XLP|XLPD|XLPD1	SH2 domain containing 1A	protein-coding	1.1	2.91	1.09	15.51	4.67	3.11	12.67	2.39474
chr14	58454248	58454748	Intergenic	LTR33|LTR|ERVL	-121906	NM_001206920	341880	Hs.28280	NM_001080455	ENSG00000151812	SLC35F4	C14orf36|c14_5373	solute carrier family 35 member F4	protein-coding	13.76	15.69	5.63	3.48	1.1	1.83	2.26	-2.40367
chr2	181544432	181544932	Intergenic	ERV3-16A3_LTR|LTR|ERVL	-12149	NR_104322	101669767		NR_104319	ENSG00000281131	SCHLAP1	LINC00913|PCAT11|PCAT114	SWI/SNF complex antagonist associated with prostate cancer 1 (non-protein coding)	ncRNA	15.78	18.93	5.63	0.79	0.82	2.38	2.43	-3.11856
chr8	110619985	110620485	promoter-TSS (NM_001330596)	promoter-TSS (NM_001330596)	56	NM_001330596	55638	Hs.390738	NM_017786	ENSG00000147642	SYBU	GOLSYN|OCSYN|SNPHL	syntabulin	protein-coding	3.67	4.21	2.17	48.43	30.74	18.86	36.09	3.49689
chr18	68044019	68044519	Intergenic	Intergenic	7558	NR_110764	101060542	Hs.586967	NR_110764	ENSG00000266278	LINC01910	-	long intergenic non-protein coding RNA 1910	ncRNA	1.1	0.97	2.37	14.88	17.29	13.55	22.9	3.20955
chr19	45950132	45950632	Intergenic	Intergenic	10470	NR_106736	102464836		NR_106736	ENSG00000275726	MIR6088	hsa-mir-6088	microRNA 6088	ncRNA	19.44	25.72	5.73	1.9	3.02	2.75	3.64	-2.58937
chr10	35974344	35974844	Intergenic	Intergenic	-44232	NM_031866	8325	Hs.302634	NM_031866	ENSG00000177283	FZD8	FZ-8|hFZ8	frizzled class receptor 8	protein-coding	1.28	0.32	1.48	9.02	7.41	5.68	5.2	2.44055
chr7	23114526	23115026	Intergenic	Intergenic	30546	NR_046220	100775104		NR_046220	ENSG00000230658	KLHL7-AS1	PLATAK	KLHL7 antisense RNA 1 (head to head)	ncRNA	1.28	2.27	0.89	19.15	15.37	10.8	6.07	3.19328
chr4	86791758	86792258	intron (NM_001287805, intron 1 of 7)	intron (NM_001287805, intron 1 of 7)	42962	NM_001287805	83478	Hs.444229	NM_031305	ENSG00000138639	ARHGAP24	FILGAP|RC-GAP72|RCGAP72|p73|p73RhoGAP	Rho GTPase activating protein 24	protein-coding	0.92	2.91	0.89	14.88	7.96	4.58	16.48	3.01011
chr1	63173018	63173518	Intergenic	L2c|LINE|L2	-19229	NM_033407	85440	Hs.744927	NM_033407	ENSG00000116641	DOCK7	EIEE23|ZIR2	dedicator of cytokinesis 7	protein-coding	0.92	0.97	1.48	13.3	6.59	6.04	13.88	2.75329
chr9	85175245	85175745	Intergenic	Intergenic	502548	NM_152573	158158	Hs.129136	NM_152573	ENSG00000165105	RASEF	RAB45	RAS and EF-hand domain containing	protein-coding	3.3	3.88	1.48	23.9	12.9	7.51	15.09	2.57291
chr1	45346873	45347373	intron (NM_001166588, intron 7 of 9)	intron (NM_001166588, intron 7 of 9)	-38507	NM_003738	8643	Hs.591497	NM_003738	ENSG00000117425	PTCH2	PTC2	patched 2	protein-coding	11.92	22.16	5.53	0.47	1.65	1.46	5.03	-2.48167
chr6	51478284	51478784	Intergenic	Intergenic	-8134	NR_125840	101927082	Hs.730296	NR_125840		LOC101927082	-	uncharacterized LOC101927082	ncRNA	1.65	1.78	1.98	23.27	15.09	9.34	15.96	3.23003
chr4	88330441	88330941	Intergenic	Intergenic	-13037	NM_001248011	53343	Hs.149500	NM_024047	ENSG00000170502	NUDT9	NUDT10	nudix hydrolase 9	protein-coding	1.1	1.13	1.88	15.83	18.66	7.51	9.72	3.1414
chr20	11668254	11668754	Intergenic	Intergenic	182859	NR_110635	728450	Hs.560990	NR_110635	ENSG00000228422	LINC00687	C20orf61|dJ1012F16.1	long intergenic non-protein coding RNA 687	ncRNA	2.2	1.29	2.47	11.24	12.08	6.77	11.45	2.63491
chr9	4933221	4933721	Intergenic	Intergenic	-51615	NM_001322194	3717	Hs.656213	NM_004972	ENSG00000096968	JAK2	JTK10|THCYT3	Janus kinase 2	protein-coding	16.69	32.68	6.02	1.58	2.47	1.46	1.39	-3.36537
chr1	231369714	231370214	intron (NM_152379, intron 2 of 6)	intron (NM_152379, intron 2 of 6)	-6955	NM_014236	8443	Hs.498028	NM_014236	ENSG00000116906	GNPAT	DAP-AT|DAPAT|DHAPAT|RCDP2	glyceronephosphate O-acyltransferase	protein-coding	1.1	2.75	2.37	12.66	21.68	15.01	26.2	3.32189
chr18	45576066	45577049	intron (NM_001318841, intron 3 of 4)	intron (NM_001318841, intron 3 of 4)	87122	NM_001039360	201501	Hs.515388	NM_001039360	ENSG00000184828	ZBTB7C	APM-1|APM1|ZBTB36|ZNF857C	zinc finger and BTB domain containing 7C	protein-coding	36.69	60.02	17.38	10.76	11.53	9.7	5.73	-2.72992
chr6	24196365	24196865	intron (NM_016356, intron 8 of 9)	(TAGA)n|Simple_repeat|Simple_repeat	70201	NM_080723	140767	Hs.726270	NM_080723	ENSG00000152954	NRSN1	VMP|p24	neurensin 1	protein-coding	1.83	0.65	1.19	18.2	15.64	8.79	20.3	3.60608
chr9	112239785	112240285	intron (NM_001145368, intron 1 of 24)	intron (NM_001145368, intron 1 of 24)	20558	NM_002829	5774	Hs.436429	NM_002829	ENSG00000070159	PTPN3	PTP-H1|PTPH1	protein tyrosine phosphatase, non-receptor type 3	protein-coding	2.38	7.93	7.9	35.14	20.58	24.17	35.39	2.32559
chr8	86465091	86465591	Intergenic	Intergenic	-88197	NR_121630	100996348	Hs.606624	NR_121630	ENSG00000253549	CA3-AS1	-	CA3 antisense RNA 1	ncRNA	0.37	0	1.58	14.4	4.39	7.51	9.72	2.95544
chr13	38473805	38474305	Intergenic	L1MDa|LINE|L1	-30116	NM_001135958	7223	Hs.262960	NM_003306	ENSG00000133107	TRPC4	HTRP-4|HTRP4|TRP4	transient receptor potential cation channel subfamily C member 4	protein-coding	0.73	1.29	1.28	7.76	10.15	8.61	6.42	3.2167
chr17	72565395	72566089	Intergenic	Intergenic	-2260	NM_001324076	100130520		NM_001324073		LOC100130520	CD300H|CD300Hs	CD300c molecule-like	protein-coding	37.6	79.76	13.33	4.43	5.49	7.14	7.98	-2.96216
chr7	96415410	96415910	Intergenic	Intergenic	-76457	NM_006304	7979	Hs.489201	NM_006304	ENSG00000127922	SEM1	DSS1|ECD|SHFD1|SHFM1|SHSF1|Shfdg1	SEM1, 26S proteasome complex subunit	protein-coding	6.97	23.94	6.32	2.37	1.65	2.2	2.26	-2.50189
chr3	78451854	78452354	Intergenic	L2b|LINE|L2	616505	NM_001145845	6091	Hs.744218	NM_002941	ENSG00000169855	ROBO1	DUTT1|SAX3	roundabout guidance receptor 1	protein-coding	11.74	25.4	5.63	1.42	3.57	1.28	1.56	-2.83624
chr8	56838629	56839129	intron (NM_002350, intron 1 of 12)	intron (NM_002350, intron 1 of 12)	46493	NM_002350	4067	Hs.491767	NM_002350	ENSG00000254087	LYN	JTK8|p53Lyn|p56Lyn	LYN proto-oncogene, Src family tyrosine kinase	protein-coding	1.47	2.27	0.99	23.58	21.13	22.89	19.43	3.75014
chr4	153406875	153407375	intron (NM_001257069, intron 2 of 3)	Tigger3b|DNA|TcMar-Tigger	3443	NR_036092	100422896		NR_036092	ENSG00000264678	MIR3140	mir-3140	microRNA 3140	ncRNA	2.93	2.1	0.89	15.04	7.41	9.52	17.18	2.63864
chr5	156226133	156226633	Intergenic	Intergenic	-51166	NR_038443	153743	Hs.567727	NM_206858	ENSG00000231989	PPP1R2P3	-	protein phosphatase 1 regulatory inhibitor subunit 2 pseudogene 3	pseudo	1.47	1.29	2.17	10.92	15.09	5.86	7.63	2.41217
chr8	119890693	119891193	Intergenic	Intergenic	73440	NM_002546	4982	Hs.81791	NM_002546	ENSG00000164761	TNFRSF11B	OCIF|OPG|PDB5|TR1	TNF receptor superfamily member 11b	protein-coding	1.1	0.49	1.98	13.14	17.02	13.73	13.71	3.32959
chr2	231035172	231035672	exon (NM_004509, exon 17 of 18)	exon (NM_004509, exon 17 of 18)	49405	NM_004510	3431	Hs.145150	NM_004509	ENSG00000135899	SP110	IFI41|IFI75|IPR1|VODI	SP110 nuclear body protein	protein-coding	0.92	2.27	3.16	8.55	15.09	13.37	8.15	2.33689
chr1	177939026	177939526	promoter-TSS (NM_033127)	promoter-TSS (NM_033127)	-226	NM_033127	89866	Hs.149540	NM_033127	ENSG00000120341	SEC16B	LZTR2|PGPR-p117|RGPR|SEC16S	SEC16 homolog B, endoplasmic reticulum export factor	protein-coding	4.59	3.24	3.95	33.87	36.78	19.04	32.27	2.9764
chr18	53089253	53089753	5' UTR (NM_001243233, exon 1 of 16)	5' UTR (NM_001243233, exon 1 of 16)	220	NM_001243233	6925	Hs.605153	NM_003199	ENSG00000196628	TCF4	E2-2|FECD3|ITF-2|ITF2|PTHS|SEF-2|SEF2|SEF2-1|SEF2-1A|SEF2-1B|SEF2-1D|TCF-4|bHLHb19	transcription factor 4	protein-coding	6.42	9.55	3.26	0.47	0.27	1.28	2.08	-2.71033
chr12	117400729	117401229	intron (NM_153348, intron 4 of 10)	intron (NM_153348, intron 4 of 10)	24163	NR_103809	100506551	Hs.657861	NR_103809	ENSG00000257279	LOC100506551	-	uncharacterized LOC100506551	ncRNA	4.04	1.94	2.57	13.14	9.88	13.92	19.26	2.40862
chr3	5418389	5418889	Intergenic	L1PA6|LINE|L1	-126699	NR_039953	100616334		NR_039953	ENSG00000265180	MIR4790	-	microRNA 4790	ncRNA	1.47	6.96	5.23	42.26	26.35	19.59	30.19	2.78871
chr6	148030514	148031014	Intergenic	Intergenic	200936	NM_001030060	389432	Hs.567973	NM_001030060	ENSG00000203727	SAMD5	dJ875H10.1	sterile alpha motif domain containing 5	protein-coding	0.73	1.78	2.57	21.68	13.72	10.44	13.36	2.9331
chrX	140901932	140902432	Intergenic	L1MA1|LINE|L1	-23920	NM_138702	139081	Hs.356870	NM_138702	ENSG00000165509	MAGEC3	CT7.2|HCA2|MAGE-C3|MAGEC4	MAGE family member C3	protein-coding	0.37	2.59	1.68	29.44	4.12	2.01	7.11	2.90818
chr3	63177924	63178424	Intergenic	Intergenic	-85740	NM_001130003	132204	Hs.648668	NM_144642	ENSG00000163630	SYNPR	SPO	synaptoporin	protein-coding	2.02	0.97	1.48	5.07	8.23	8.42	8.33	2.52205
chr1	163641035	163641535	Intergenic	Intergenic	-248304	NR_104294	100422212	Hs.556898	NR_104294		LOC100422212	-	eukaryotic translation initiation factor 3 subunit J pseudogene	pseudo	2.93	2.27	3.26	33.08	15.37	13.73	18.91	2.96134
chr16	10173769	10174704	intron (NM_000833, intron 3 of 13)	intron (NM_000833, intron 3 of 13)	101687	NM_001134408	2903	Hs.411472	NM_000833	ENSG00000183454	GRIN2A	EPND|FESD|GluN2A|LKS|NMDAR2A|NR2A	glutamate ionotropic receptor NMDA type subunit 2A	protein-coding	7.34	9.38	7.01	30.07	18.66	19.41	24.64	2.41814
chr7	120947159	120947659	Intergenic	Intergenic	-18012	NM_016087	51384	Hs.272375	NM_016087	ENSG00000002745	WNT16	-	Wnt family member 16	protein-coding	12.11	13.91	5.43	1.27	0.82	1.1	1.39	-3.13606
chr14	89297594	89298094	intron (NM_198310, intron 2 of 13)	MER66C|LTR|ERV1	7347	NM_001288782	123016	Hs.303055	NM_144596	ENSG00000165533	TTC8	BBS8|RP51	tetratricopeptide repeat domain 8	protein-coding	6.6	21.19	5.33	1.42	2.74	1.28	1.56	-2.95454
chr3	190251280	190251780	intron (NM_001167929, intron 1 of 10)	intron (NM_001167929, intron 1 of 10)	19690	NM_001167931	3556	Hs.478673	NM_002182	ENSG00000196083	IL1RAP	C3orf13|IL-1RAcP|IL1R3	interleukin 1 receptor accessory protein	protein-coding	14.49	14.88	8.59	3.01	1.65	2.56	2.43	-2.66756
chr6	31155502	31156002	Intergenic	Intergenic	-9785	NR_026791	253018	Hs.659818	NR_026791	ENSG00000206344	HCG27	bCX101P6.9|bPG299F13.9|bQB115I13.2	HLA complex group 27 (non-protein coding)	ncRNA	1.83	1.62	1.38	11.08	4.94	9.52	11.1	2.73942
chr2	224725697	224726581	Intergenic	Intergenic	-23820	NR_110905	130340	Hs.632555	NM_178814	ENSG00000152056	AP1S3	PSORS15	adaptor related protein complex 1 sigma 3 subunit	protein-coding	4.04	4.53	5.14	21.84	19.49	16.11	20.99	3.06359
chr2	50816109	50816609	intron (NM_001135659, intron 9 of 23)	intron (NM_001135659, intron 9 of 23)	107041	NR_130470	103504737		NR_130470	ENSG00000216191	MIR8485	hsa-mir-8485	microRNA 8485	ncRNA	3.49	3.72	2.27	1.11	5.76	1.46	55	2.68245
chr1	78579695	78580474	intron (NM_017655, intron 3 of 5)	intron (NM_017655, intron 3 of 5)	68496	NM_017655	54810	Hs.603818	NM_017655	ENSG00000137960	GIPC2	SEMCAP-2|SEMCAP2	GIPC PDZ domain containing family member 2	protein-coding	21.1	44.33	11.36	9.81	12.62	7.14	10.58	-2.57486
chr3	129200451	129200951	intron (NM_001280546, intron 12 of 27)	intron (NM_001280546, intron 12 of 27)	-41679	NM_001276272	8930	Hs.35947	NM_003925	ENSG00000129071	MBD4	MED1	methyl-CpG binding domain 4, DNA glycosylase	protein-coding	17.98	44.01	9.68	4.75	3.29	3.48	2.6	-2.58136
chr12	51823883	51824383	intron (NM_001258403, intron 1 of 16)	intron (NM_001258403, intron 1 of 16)	5232	NM_001258403	9498	Hs.4749	NM_004858	ENSG00000050438	SLC4A8	NBC3|NDCBE	solute carrier family 4 member 8	protein-coding	2.75	1.78	1.78	12.19	6.31	3.66	12.84	2.60113
chr16	75561814	75562314	TTS (NM_024533)	TTS (NM_024533)	7004	NM_024533	23563	Hs.745424	NM_012126	ENSG00000135702	CHST5	I-GlcNAc-6-ST|I-GlcNAc6ST|glcNAc6ST-3|gn6st-3|hIGn6ST	carbohydrate sulfotransferase 5	protein-coding	0.92	2.43	1.58	10.6	22.23	13.73	21.86	3.88404
chr11	124704374	124704874	TTS (NR_103862)	TTS (NR_103862)	-30681	NM_022370	64221	Hs.435621	NM_022370	ENSG00000154134	ROBO3	HGPPS|HGPS|RBIG1|RIG1	roundabout guidance receptor 3	protein-coding	1.28	0.81	1.09	12.03	16.74	9.15	13.53	3.66335
chr2	147935011	147935511	Intergenic	Intergenic	590636	NR_026904	728773	Hs.334462	NR_026904		PABPC1P2	PABP2|PABP4|PABPCP2|PABPCP4	poly(A) binding protein cytoplasmic 1 pseudogene 2	pseudo	3.85	3.07	1.28	17.57	9.61	10.25	19.26	2.51763
chr13	97578156	97578656	Intergenic	Intergenic	58020	NR_051966	100887754	Hs.617003	NR_051966		LINC00359	-	long intergenic non-protein coding RNA 359	ncRNA	1.47	1.78	1.19	15.2	12.35	9.7	6.42	3.16233
chr2	114588720	114589220	non-coding (NR_110174, exon 5 of 5)	non-coding (NR_110174, exon 5 of 5)	-58541	NR_102318	10096	Hs.433512	NM_005721	ENSG00000115091	ACTR3	ARP3	ARP3 actin related protein 3 homolog	protein-coding	4.95	26.7	4.94	1.58	0.82	2.2	1.56	-2.77039
chr5	144923523	144924023	Intergenic	Intergenic	291159	NM_138492	153768	Hs.314261	NM_138492	ENSG00000186314	PRELID2	-	PRELI domain containing 2	protein-coding	2.02	1.62	2.17	15.83	16.19	13.55	14.23	2.74285
chr2	135441014	135441514	intron (NM_030923, intron 2 of 7)	intron (NM_030923, intron 2 of 7)	35307	NM_030923	81615	Hs.369471	NM_030923	ENSG00000152128	TMEM163	DC29|SV31	transmembrane protein 163	protein-coding	0.92	2.1	1.88	18.04	12.62	12.08	17.7	3.12195
chr11	59729141	59729641	intron (NR_130719, intron 3 of 8)	MER49|LTR|ERV1	19039	NR_130719	255649	Hs.722773	NR_130719	ENSG00000214788	OOSP1	-	oocyte secreted protein 1, pseudogene	pseudo	1.83	0.97	1.58	15.99	11.53	6.96	9.72	2.98071
chr22	26889533	26890033	intron (NM_012143, intron 14 of 14)	intron (NM_012143, intron 14 of 14)	9933	NM_001013694	402055	Hs.709914	NM_001013694	ENSG00000100104	SRRD	HC/HCC|SRR1L	SRR1 domain containing	protein-coding	17.43	25.24	6.81	1.42	4.67	3.85	3.3	-2.37053
chr10	85938745	85939427	intron (NM_207373, intron 2 of 2)	intron (NM_207373, intron 2 of 2)	5532	NM_207373	387695	Hs.298713	NM_207373	ENSG00000188373	C10orf99	AP-57|CSBF|UNQ1833	chromosome 10 open reading frame 99	protein-coding	41.64	98.37	14.81	5.22	4.94	5.49	6.94	-3.13084
chr2	67264823	67265323	Intergenic	Intergenic	-48505	NR_110564	102800447	Hs.144196	NR_110564		LINC01828	-	long intergenic non-protein coding RNA 1828	ncRNA	1.1	3.24	2.17	9.97	13.72	8.06	7.29	2.61487
chr4	141264393	141264893	promoter-TSS (NM_001153635)	promoter-TSS (NM_001153635)	28	NM_001153585	60592	Hs.480815	NM_032547	ENSG00000153130	SCOC	HRIHFB2072|SCOCO|UNC-69	short coiled-coil protein	protein-coding	2.75	2.27	3.56	25.8	17.29	13	16.48	2.4706
chr7	142123238	142123738	Intergenic	L2b|LINE|L2	-151420	NR_036483	207147	Hs.604069	NR_036483	ENSG00000186163	TRY2P	-	trypsinogen-like pseudogene	pseudo	3.85	3.4	3.16	17.57	24.15	14.46	23.25	2.46371
chr7	118395081	118395581	Intergenic	LTR45C|LTR|ERV1	530619	NM_019644	56311	Hs.729340	NM_019644	ENSG00000106013	ANKRD7	TSA806	ankyrin repeat domain 7	protein-coding	10.82	24.43	3.46	2.22	1.92	2.2	1.91	-2.56748
chr3	56662997	56663497	intron (NM_001112736, intron 18 of 23)	intron (NM_001112736, intron 18 of 23)	34827	NM_015224	23272	Hs.116877	NM_015224	ENSG00000163946	FAM208A	C3orf63|RAP140|TASOR|se89-1	family with sequence similarity 208 member A	protein-coding	1.83	1.62	2.27	13.61	19.49	10.99	12.32	2.61098
chr11	85498811	85499311	intron (NM_032943, intron 1 of 18)	intron (NM_032943, intron 1 of 18)	23141	NM_032943	54843	Hs.369520	NM_032379	ENSG00000137501	SYTL2	CHR11SYT|EXO4|PPP1R151|SGA72M|SLP2|SLP2A	synaptotagmin like 2	protein-coding	2.75	2.1	0.99	16.3	21.13	13.37	16.83	3.4917
chr12	103508440	103508940	Intergenic	Intergenic	-36930	NR_126333	101929058	Hs.171310	NR_126333	ENSG00000257860	LOC101929058	-	uncharacterized LOC101929058	ncRNA	2.02	1.13	2.37	14.72	9.33	6.41	8.85	2.38329
chr2	28456176	28456676	intron (NR_137440, intron 7 of 13)	intron (NR_137440, intron 7 of 13)	-26598	NR_120504	100505736	Hs.659540	NR_120504		LOC100505736	-	uncharacterized LOC100505736	ncRNA	1.83	2.91	1.09	10.92	5.49	10.99	11.45	2.68756
chr9	14107976	14108476	intron (NM_001282787, intron 9 of 10)	intron (NM_001282787, intron 9 of 10)	72575	NM_001282787	4781	Hs.644095	NM_005596	ENSG00000147862	NFIB	CTF|HMGIC/NFIB|NF-I/B|NF1-B|NFI-B|NFI-RED|NFIB2|NFIB3	nuclear factor I B	protein-coding	0.37	0.32	1.88	12.19	4.39	7.14	12.67	2.96826
chr9	8287498	8287998	Intergenic	Intergenic	446198	NM_001171025	5789	Hs.446083	NM_002839	ENSG00000153707	PTPRD	HPTP|HPTPD|HPTPDELTA|PTPD|RPTPDELTA	protein tyrosine phosphatase, receptor type D	protein-coding	1.83	1.29	1.48	15.99	4.94	8.97	7.29	2.47353
chr11	113255224	113255724	Intergenic	Intergenic	-3039	NM_178510	255239	Hs.448473	NM_178510	ENSG00000170209	ANKK1	PKK2	ankyrin repeat and kinase domain containing 1	protein-coding	14.49	32.2	8.39	3.17	2.74	1.28	1.56	-3.10228
chr16	46934298	46934798	intron (NM_001142466, intron 3 of 11)	intron (NM_001142466, intron 3 of 11)	15522	NM_001142466	84706	Hs.460693	NM_133443	ENSG00000166123	GPT2	ALT2|GPT 2|MRT49	glutamic--pyruvic transaminase 2	protein-coding	22.75	46.59	9.58	4.43	4.12	3.3	7.46	-2.34138
chr4	94763756	94764256	Intergenic	Intergenic	13928	NM_005172	474	Hs.532680	NM_005172	ENSG00000172238	ATOH1	ATH1|HATH1|MATH-1|bHLHa14	atonal bHLH transcription factor 1	protein-coding	2.02	2.1	2.17	27.86	20.03	8.06	15.61	3.19706
chr21	16512794	16513294	Intergenic	Intergenic	-75918	NM_003489	8204	Hs.155017	NM_003489	ENSG00000180530	NRIP1	RIP140	nuclear receptor interacting protein 1	protein-coding	4.59	2.1	3.46	30.55	20.03	17.03	23.25	2.69947
chrX	25542221	25542721	Intergenic	Intergenic	-508406	NM_139058	170302	Hs.300304	NM_139058	ENSG00000004848	ARX	CT121|EIEE1|ISSX|MRX29|MRX32|MRX33|MRX36|MRX38|MRX43|MRX54|MRX76|MRX87|MRXS1|PRTS	aristaless related homeobox	protein-coding	1.47	1.62	1.38	7.6	6.04	3.66	11.8	2.52852
chr1	43514265	43514765	Intergenic	Intergenic	-89668	NM_006516	6513	Hs.473721	NM_006516	ENSG00000117394	SLC2A1	CSE|DYT17|DYT18|DYT9|EIG12|GLUT|GLUT-1|GLUT1|GLUT1DS|HTLVR|PED|SDCHCN	solute carrier family 2 member 1	protein-coding	13.76	31.55	8.49	0.95	3.02	3.48	3.3	-2.72418
chr15	37311983	37312483	intron (NM_170677, intron 8 of 12)	intron (NM_170677, intron 8 of 12)	-47131	NR_107030	102466875		NR_107030	ENSG00000277202	MIR8063	hsa-mir-8063	microRNA 8063	ncRNA	2.57	2.1	1.28	12.03	10.7	7.14	10.41	2.48648
chr4	140164529	140165029	Intergenic	Intergenic	36713	NM_032623	84709	Hs.710036	NM_032623	ENSG00000137463	MGARP	C4orf49|CESP-1|HUMMR|OSAP	mitochondria localized glutamic acid rich protein	protein-coding	11.74	23.3	4.44	1.58	1.65	2.38	1.39	-2.96496
chr14	95354387	95354887	Intergenic	Intergenic	117658	NR_144432	108868751		NR_144432		DIGIT	-	divergent to GSC, Induced by TGF-b family signaling	ncRNA	1.1	3.56	2.77	15.35	11.8	13.37	9.72	2.60774
chr1	177867931	177868431	Intergenic	Intergenic	70869	NM_033127	89866	Hs.149540	NM_033127	ENSG00000120341	SEC16B	LZTR2|PGPR-p117|RGPR|SEC16S	SEC16 homolog B, endoplasmic reticulum export factor	protein-coding	3.12	3.07	3.85	22.32	11.53	15.01	20.99	2.38446
chr10	48342671	48343171	Intergenic	L1MB4|LINE|L1	-10724	NR_134500	107001062	Hs.576719	NR_134500		LOC107001062	-	uncharacterized LOC107001062	ncRNA	10.64	19.25	4.84	1.74	3.29	1.65	1.39	-2.56434
chr7	31987649	31988149	intron (NM_001322059, intron 3 of 17)	intron (NM_001322059, intron 3 of 17)	122575	NM_001191057	5137	Hs.143821	NM_005020	ENSG00000154678	PDE1C	Hcam3|cam-PDE 1C|hCam-3	phosphodiesterase 1C	protein-coding	0.37	3.24	2.57	24.53	25.25	10.99	14.23	3.32261
chr2	70191569	70192069	intron (NR_033872, intron 9 of 10)	intron (NR_033872, intron 9 of 10)	-2422	NM_152792	151516	Hs.516253	NM_152792	ENSG00000244617	ASPRV1	MUNO|SASP|SASPase|Taps	aspartic peptidase, retroviral-like 1	protein-coding	2.75	3.4	2.67	17.25	23.33	16.3	21.86	2.94211
chr2	190406736	190407236	Intergenic	Intergenic	38551	NM_014585	30061	Hs.643005	NM_014585	ENSG00000138449	SLC40A1	FPN1|HFE4|IREG1|MST079|MSTP079|MTP1|SLC11A3	solute carrier family 40 member 1	protein-coding	3.67	1.62	3.46	23.74	19.76	18.86	17.35	2.5449
chr18	18970861	18971559	intron (NM_001142966, intron 4 of 32)	Tigger3b|DNA|TcMar-Tigger	149007	NM_001142966	80000	Hs.149020	NM_024935	ENSG00000141449	GREB1L	C18orf6|KIAA1772	growth regulation by estrogen in breast cancer 1 like	protein-coding	3.49	2.59	3.75	12.82	3.57	15.75	29.32	2.34532
chr6	94612171	94612671	Intergenic	AluSx|SINE|Alu	195620	NR_015362	643432	Hs.509936	NR_015362		TSG1	-	tumor suppressor TSG1	ncRNA	1.65	1.29	1.09	13.77	14.27	2.56	9.72	2.81885
chr3	33397073	33397573	intron (NM_001171713, intron 2 of 13)	intron (NM_001171713, intron 2 of 13)	78386	NM_001171713	25827	Hs.475872	NM_012157	ENSG00000153558	FBXL2	FBL2|FBL3	F-box and leucine rich repeat protein 2	protein-coding	3.12	2.91	1.09	18.36	17.84	13.55	12.49	2.74255
chr3	5252519	5253019	intron (NM_014674, intron 9 of 11)	intron (NM_014674, intron 9 of 11)	23410	NM_014674	9695	Hs.224616	NM_014674	ENSG00000134109	EDEM1	EDEM	ER degradation enhancing alpha-mannosidase like protein 1	protein-coding	1.28	2.1	1.88	12.98	6.86	6.96	11.8	2.40611
chr15	92437823	92438323	intron (NR_135775, intron 1 of 10)	intron (NR_135775, intron 1 of 10)	40543	NR_135775	28232	Hs.311187	NM_013272	ENSG00000176463	SLCO3A1	OATP-D|OATP-RP3|OATP3A1|OATPD|OATPRP3|SLC21A11	solute carrier organic anion transporter family member 3A1	protein-coding	7.7	18.93	5.33	1.9	2.47	1.28	0.52	-2.80011
chr8	98077103	98077603	intron (NM_016134, intron 6 of 7)	intron (NM_016134, intron 6 of 7)	212823	NM_033512	85453	Hs.173094	NM_033512	ENSG00000180543	TSPYL5	-	TSPY like 5	protein-coding	1.1	2.27	2.07	7.76	14.27	12.08	13.88	3.08084
chr8	4188967	4189467	intron (NM_033225, intron 3 of 69)	intron (NM_033225, intron 3 of 69)	663111	NM_033225	64478	Hs.571466	NM_033225	ENSG00000183117	CSMD1	PPP1R24	CUB and Sushi multiple domains 1	protein-coding	0.92	0.97	1.88	10.29	6.86	8.42	7.98	2.56223
chr3	98164718	98165218	Intergenic	Intergenic	-23356	NM_001004736	26339	Hs.621533	NM_001004736	ENSG00000232382	OR5K1	HSHTPCRX10|HTPCRX10|OR3-8	olfactory receptor family 5 subfamily K member 1	protein-coding	16.51	21.36	6.91	3.64	2.47	1.28	3.12	-2.76911
chr9	81735417	81735917	Intergenic	Intergenic	24914	NR_109771	101927450	Hs.738041	NR_109771	ENSG00000260995	LOC101927450	-	uncharacterized LOC101927450	ncRNA	14.86	17.15	8.69	3.64	2.74	3.11	1.73	-2.42302
chr9	7811593	7812093	Intergenic	Intergenic	-12037	NM_033428	90871	Hs.7517	NM_033428	ENSG00000137038	TMEM261	C9orf123	transmembrane protein 261	protein-coding	0.73	1.62	1.19	8.07	6.31	4.39	6.77	2.4317
chr6	77500020	77500520	Intergenic	MSTA-int|LTR|ERVL-MaLR	673469	NM_000863	3351	Hs.123016	NM_000863	ENSG00000135312	HTR1B	5-HT-1B|5-HT-1D-beta|5-HT1B|5-HT1DB|HTR1D2|HTR1DB|S12	5-hydroxytryptamine receptor 1B	protein-coding	2.2	0.65	1.98	8.71	14.82	6.96	4.86	2.35775
chr7	141851858	141852358	intron (NM_001293626, intron 15 of 47)	intron (NM_001293626, intron 15 of 47)	40559	NM_001293626	93432	Hs.647098	NM_001008748	ENSG00000257743	MGAM2	-	maltase-glucoamylase 2 (putative)	protein-coding	0.92	0.49	1.58	11.08	8.51	5.68	6.25	2.79127
chr8	52432750	52433551	intron (NM_144651, intron 4 of 22)	intron (NM_144651, intron 4 of 22)	288854	NM_144651	137902	Hs.444882	NM_144651	ENSG00000147485	PXDNL	PMR1|PRM1|VPO2	peroxidasin like	protein-coding	14.12	20.71	10.17	7.6	4.67	4.94	3.64	-2.4967
chr6	64492938	64493438	intron (NM_001292009, intron 39 of 43)	MLT1J1|LTR|ERVL-MaLR	136757	NM_015153	23469	Hs.348921	NM_015153	ENSG00000118482	PHF3	-	PHD finger protein 3	protein-coding	2.2	2.43	1.78	21.53	21.41	10.62	7.81	2.7659
chr3	170984826	170985326	intron (NM_001161560, intron 2 of 31)	intron (NM_001161560, intron 2 of 31)	-160528	NR_030295	693154		NR_030295	ENSG00000207963	MIR569	MIRN569|hsa-mir-569	microRNA 569	ncRNA	9.17	19.41	4.64	1.27	2.2	1.65	1.56	-2.61388
chr8	95203990	95204490	intron (NM_004063, intron 2 of 17)	intron (NM_004063, intron 2 of 17)	16575	NM_004063	1015	Hs.591853	NM_004063	ENSG00000079112	CDH17	CDH16|HPT-1|HPT1	cadherin 17	protein-coding	1.65	1.29	1.68	6.96	16.74	12.27	9.54	3.29859
chr10	76593620	76594120	intron (NM_012330, intron 1 of 17)	intron (NM_012330, intron 1 of 17)	7699	NM_012330	23522	Hs.35758	NM_012330	ENSG00000156650	KAT6B	GTPTS|MORF|MOZ2|MYST4|ZC2HC6B|qkf|querkopf	lysine acetyltransferase 6B	protein-coding	5.69	14.72	3.36	1.11	1.37	2.38	1.04	-2.63366
chr3	157291769	157292269	intron (NM_001130002, intron 4 of 4)	intron (NM_001130002, intron 4 of 4)	30886	NM_001130002	152078	Hs.259046	NM_001099777	ENSG00000174899	PQLC2L	C3orf55	PQ loop repeat containing 2 like	protein-coding	1.1	1.62	1.78	12.66	15.37	4.39	11.8	2.74326
chr10	127160714	127161214	Intergenic	Intergenic	-101976	NR_023362	100169752	Hs.652647	NR_023362	ENSG00000237675	TEX36-AS1	-	TEX36 antisense RNA 1	ncRNA	2.2	2.27	3.26	12.03	10.98	12.45	21.34	2.55557
chr5	150999252	150999752	Intergenic	Intergenic	-50997	NM_001447	2196	Hs.591255	NM_001447	ENSG00000086570	FAT2	CDHF8|CDHR9|HFAT2|MEGF1	FAT atypical cadherin 2	protein-coding	12.47	27.02	6.62	3.17	3.57	3.11	1.56	-2.32578
chr17	63060439	63060939	Intergenic	Intergenic	-7769	NM_006572	10672	Hs.515018	NM_006572	ENSG00000120063	GNA13	G13	G protein subunit alpha 13	protein-coding	15.41	24.43	6.22	1.9	2.2	2.93	3.64	-2.63098
chr4	111828887	111829387	Intergenic	MIRb|SINE|MIR	-265858	NM_001204398	5308	Hs.643588	NM_000325	ENSG00000164093	PITX2	ARP1|Brx1|IDG2|IGDS|IGDS2|IHG2|IRID2|Otlx2|PTX2|RGS|RIEG|RIEG1|RS	paired like homeodomain 2	protein-coding	0.73	2.43	1.58	8.86	14	6.77	5.38	2.41678
chr8	30505212	30505712	intron (NM_002095, intron 2 of 7)	L2b|LINE|L2	9345	NM_001206847	100507341	Hs.659493	NM_001206847	ENSG00000253457	SMIM18	-	small integral membrane protein 18	protein-coding	1.1	3.24	2.37	12.19	9.06	9.7	11.1	2.324
chr12	94441414	94441914	Intergenic	Intergenic	-100835	NM_005761	10154	Hs.584845	NM_005761	ENSG00000136040	PLXNC1	CD232|PLXN-C1|VESPR	plexin C1	protein-coding	11.19	30.58	8	2.06	3.29	2.93	2.26	-2.57294
chr1	232817921	232818421	Intergenic	Intergenic	60290	NR_110683	101927683	Hs.520568	NR_110683	ENSG00000236497	LINC01744	-	long intergenic non-protein coding RNA 1744	ncRNA	0.92	1.62	1.78	12.5	11.53	10.44	11.97	3.49918
chr8	8549341	8549841	Intergenic	Intergenic	-10075	NM_194284	137075	Hs.183617	NM_194284	ENSG00000253958	CLDN23	CLDNL|hCG1646163	claudin 23	protein-coding	2.75	1.78	2.07	10.45	5.76	9.15	9.72	2.47407
chr5	40734180	40734809	intron (NM_012382, intron 2 of 4)	intron (NM_012382, intron 2 of 4)	21577	NM_012382	23548	Hs.348915	NM_012382	ENSG00000113638	TTC33	OSRF	tetratricopeptide repeat domain 33	protein-coding	2.2	2.27	3.16	16.46	15.92	7.69	9.2	2.35891
chr7	33032329	33032829	intron (NM_001284341, intron 7 of 10)	intron (NM_001284341, intron 7 of 10)	13493	NM_001284343	11328	Hs.103934	NM_007270	ENSG00000122642	FKBP9	FKBP60|FKBP63|PPIase	FK506 binding protein 9	protein-coding	1.83	1.78	1.88	12.03	11.25	12.08	16.66	2.67507
chr4	62406565	62407065	intron (NM_001322402, intron 4 of 25)	intron (NM_001322402, intron 4 of 25)	339841	NM_015236	23284	Hs.28391	NM_015236	ENSG00000150471	ADGRL3	CIRL3|CL3|LEC3|LPHN3	adhesion G protein-coupled receptor L3	protein-coding	3.85	1.78	1.78	25.8	26.9	16.48	17.7	2.99479
chr8	35578322	35578822	intron (NM_080872, intron 8 of 16)	intron (NM_080872, intron 8 of 16)	-10734	NR_125819	101929550	Hs.583803	NR_125819		LOC101929550	-	uncharacterized LOC101929550	ncRNA	0.55	1.46	1.58	23.58	31.29	26.18	16.31	4.70127
chr3	101957112	101957612	Intergenic	Charlie17a|DNA|hAT-Charlie	74813	NR_135549	101929411	Hs.506540	NR_135549		LOC101929411	-	uncharacterized LOC101929411	ncRNA	4.22	3.4	3.16	33.71	26.07	23.07	16.14	2.695
chr6	162479405	162479905	intron (NM_004562, intron 4 of 11)	intron (NM_004562, intron 4 of 11)	587646	NR_134594	105378098	Hs.691066	NR_134593		LOC105378098	-	uncharacterized LOC105378098	ncRNA	2.57	4.37	4.74	36.41	30.74	7.14	22.38	2.58069
chr9	140708614	140709114	intron (NM_024757, intron 21 of 26)	CpG	-24007	NR_030333	693187		NR_030333	ENSG00000207693	MIR602	MIRN602|hsa-mir-602	microRNA 602	ncRNA	10.64	39.96	7.41	2.85	0.27	2.38	3.47	-2.89746
chr2	151071095	151071595	Intergenic	UCON27|Unknown|Unknown	272864	NM_005168	390	Hs.6838	NM_005168	ENSG00000115963	RND3	ARHE|Rho8|RhoE|memB	Rho family GTPase 3	protein-coding	0.92	0.65	2.17	16.62	15.09	11.35	13.71	3.23932
chr20	14074236	14074736	intron (NM_080676, intron 3 of 16)	L2c|LINE|L2	98340	NM_080676	140733	Hs.661576	NM_080676	ENSG00000172264	MACROD2	C20orf133	MACRO domain containing 2	protein-coding	2.57	1.29	2.17	18.84	9.88	8.61	9.2	2.42029
chr8	27340647	27341147	Intergenic	ERVL-E-int|LTR|ERVL	-4084	NM_001347708	1135	Hs.57718	NM_000742	ENSG00000120903	CHRNA2	-	cholinergic receptor nicotinic alpha 2 subunit	protein-coding	9.91	18.61	3.46	2.06	0.55	2.75	1.73	-2.48282
chr4	46658073	46658573	Intergenic	Intergenic	252929	NM_130902	170712	Hs.479656	NM_130902	ENSG00000170516	COX7B2	-	cytochrome c oxidase subunit 7B2	protein-coding	2.93	1.29	1.28	15.67	30.74	13.92	5.2	3.40206
chr5	40784285	40784785	intron (NM_006251, intron 1 of 8)	intron (NM_006251, intron 1 of 8)	13762	NM_206907	5562	Hs.43322	NM_006251	ENSG00000132356	PRKAA1	AMPK|AMPKa1	protein kinase AMP-activated catalytic subunit alpha 1	protein-coding	1.1	1.62	1.38	8.71	13.45	6.59	14.57	2.75515
chr6	884558	885058	Intergenic	Intergenic	16310	NR_110853	101927691	Hs.552556	NR_110853		LOC101927691	-	uncharacterized LOC101927691	ncRNA	3.49	3.4	2.37	9.66	14.55	13.73	13.01	2.43701
chr9	74769471	74769971	intron (NM_004293, intron 1 of 13)	intron (NM_004293, intron 1 of 13)	5454	NM_004293	9615	Hs.494163	NM_004293	ENSG00000119125	GDA	CYPIN|GUANASE|NEDASIN	guanine deaminase	protein-coding	0.73	3.4	2.67	13.14	13.72	10.8	10.93	2.79794
chr9	89347412	89347912	Intergenic	Intergenic	214442	NM_002048	2619	Hs.65029	NM_002048	ENSG00000180447	GAS1	-	growth arrest specific 1	protein-coding	7.52	15.21	5.23	2.22	1.37	1.28	2.08	-2.52568
chr7	86476090	86476590	intron (NM_000840, intron 4 of 5)	LTR40b|LTR|ERVL	118951	NM_152748	222223	Hs.208093	NM_152748	ENSG00000164659	KIAA1324L	EIG121L	KIAA1324 like	protein-coding	2.57	1.13	2.77	21.84	13.17	9.7	12.67	2.41782
chr5	41182739	41183239	intron (NM_000065, intron 6 of 17)	intron (NM_000065, intron 6 of 17)	30706	NM_000065	729	Hs.481992	NM_000065	ENSG00000039537	C6	-	complement C6	protein-coding	1.83	0.81	1.68	27.54	16.19	17.76	24.98	3.82547
chr7	12853623	12854123	Intergenic	Intergenic	126962	NM_005738	10124	Hs.245540	NM_005738	ENSG00000122644	ARL4A	ARL4	ADP ribosylation factor like GTPase 4A	protein-coding	13.02	17.47	7.01	0.95	3.02	0.92	2.08	-3.0502
chr5	36452373	36452873	Intergenic	Intergenic	-150612	NM_145000	202151	Hs.199777	NM_145000	ENSG00000164188	RANBP3L	-	RAN binding protein 3 like	protein-coding	8.8	15.05	5.43	1.27	1.65	2.56	2.08	-2.52391
chr3	169107250	169107929	intron (NM_004991, intron 1 of 16)	intron (NM_004991, intron 1 of 16)	-58065	NR_134932	105374205		NR_134932	ENSG00000241479	LOC105374205	-	uncharacterized LOC105374205	ncRNA	2.75	2.43	4.44	16.78	20.86	19.23	21.51	2.42127
chr10	59463499	59463999	Intergenic	MER82|DNA|TcMar-Tigger	-399430	NR_037490	100500834		NR_037490	ENSG00000264747	MIR3924	-	microRNA 3924	ncRNA	2.75	1.62	1.09	15.04	9.06	6.41	10.06	2.72
chr9	27371218	27371931	intron (NM_024761, intron 2 of 3)	intron (NM_024761, intron 2 of 3)	-74438	NM_020641	54586	Hs.163070	NM_020641	ENSG00000120160	EQTN	AFAF|C9orf11|SPACA8	equatorin	protein-coding	6.79	6.8	4.15	21.21	21.13	21.61	24.98	2.54208
chr5	32254952	32255646	intron (NM_001040446, intron 8 of 15)	intron (NM_001040446, intron 8 of 15)	57815	NM_001040446	54545	Hs.481836	NM_019061	ENSG00000150712	MTMR12	3-PAP|PIP3AP	myotubularin related protein 12	protein-coding	18.53	33.33	9.09	5.38	5.76	2.01	2.6	-2.68308
chr2	213963286	213963786	intron (NM_016260, intron 3 of 7)	intron (NM_016260, intron 3 of 7)	51522	NM_016260	22807	Hs.604950	NM_016260	ENSG00000030419	IKZF2	ANF1A2|HELIOS|ZNF1A2|ZNFN1A2	IKAROS family zinc finger 2	protein-coding	9.17	10.35	5.63	1.9	0.82	0.73	2.78	-2.60492
chr9	95478087	95478587	intron (NM_015250, intron 6 of 7)	intron (NM_015250, intron 6 of 7)	-45790	NM_022755	64768	Hs.459896	NM_022755	ENSG00000127080	IPPK	C9orf12|INSP5K2|IP5K|IPK1|bA476B13.1	inositol-pentakisphosphate 2-kinase	protein-coding	27.52	54.36	10.96	3.64	4.94	4.21	5.38	-2.66417
chr16	49962388	49962888	Intergenic	L2c|LINE|L2	-70808	NM_001271620	23090	Hs.443715	NM_015069	ENSG00000102935	ZNF423	Ebfaz|JBTS19|NPHP14|OAZ|Roaz|ZFP423|Zfp104|hOAZ	zinc finger protein 423	protein-coding	11.92	29.45	9.18	2.85	3.29	3.85	3.3	-2.45413
chr8	134781153	134781653	Intergenic	Intergenic	8192	NR_125422	101927798	Hs.615036	NR_125422	ENSG00000253165	LOC101927798	-	uncharacterized LOC101927798	ncRNA	17.43	44.01	7.31	0.95	5.76	6.23	1.91	-2.46022
chr7	52214908	52215408	Intergenic	Intergenic	-830600	NM_001287436	23242	Hs.99141	NM_015198	ENSG00000106078	COBL	-	cordon-bleu WH2 repeat protein	protein-coding	1.47	0.81	1.68	10.76	10.98	6.96	10.24	2.60008
chr8	27530576	27531076	TTS (NM_016240)	TTS (NM_016240)	-28368	NR_037417	100500858		NR_037417	ENSG00000279302	MIR3622A	mir-3622a	microRNA 3622a	ncRNA	20.54	27.5	6.52	3.96	1.1	5.49	3.47	-2.54262
chr9	104116677	104117177	Intergenic	MLT1A0-int|LTR|ERVL-MaLR	28874	NM_001127610	570	Hs.284712	NM_001701	ENSG00000136881	BAAT	BACAT|BAT	bile acid-CoA:amino acid N-acyltransferase	protein-coding	2.57	3.88	1.68	12.98	12.62	9.89	15.09	2.36558
chr12	89466653	89467153	Intergenic	Intergenic	-53434	NR_038385	728084	Hs.132563	NR_038385	ENSG00000246363	LOC728084	-	uncharacterized LOC728084	ncRNA	2.02	4.04	1.88	13.45	14.27	8.79	17	2.36321
chr1	84367139	84367639	intron (NM_024686, intron 18 of 20)	L2a|LINE|L2	-40710	NR_119375	101927587	Hs.621230	NR_119375	ENSG00000233008	LINC01725	-	long intergenic non-protein coding RNA 1725	ncRNA	0.92	1.94	1.88	12.98	10.15	8.24	8.15	2.64685
chr11	134367473	134367973	intron (NR_033852, intron 5 of 5)	intron (NR_033852, intron 5 of 5)	61347	NR_033852	283177	Hs.504390	NR_033852		LOC283177	-	uncharacterized LOC283177	ncRNA	2.02	4.37	3.36	19.47	20.86	9.89	9.02	2.36906
chr14	52774054	52774554	Intergenic	Intergenic	-6712	NM_000956	5732	Hs.2090	NM_000956	ENSG00000125384	PTGER2	EP2	prostaglandin E receptor 2	protein-coding	2.38	3.72	2.37	30.71	16.19	8.24	18.91	2.768
chr12	90333215	90333715	Intergenic	Intergenic	-8005	NR_135019	105369891	Hs.148998	NR_135019	ENSG00000257725	LOC105369891	-	uncharacterized LOC105369891	ncRNA	1.83	0.81	0.69	7.12	10.98	8.61	11.1	2.97253
chr11	112204961	112205461	intron (NR_126004, intron 2 of 3)	intron (NR_126004, intron 2 of 3)	63739	NR_126004	283140	Hs.651827	NR_126004	ENSG00000250303	LOC283140	-	uncharacterized LOC283140	ncRNA	15.78	30.58	7.11	5.54	2.2	2.2	3.82	-2.474
chr8	53142857	53143357	intron (NM_014682, intron 2 of 25)	intron (NM_014682, intron 2 of 25)	36185	NR_134310	101929341	Hs.147170	NR_134310	ENSG00000253551	LOC101929341	-	uncharacterized LOC101929341	ncRNA	1.47	0.32	0.59	4.75	6.59	5.86	8.33	2.80561
chr11	105073611	105074111	Intergenic	X3_LINE|LINE|RTE-BovB	-63400	NM_021571	59082	Hs.56279	NM_021571	ENSG00000255501	CARD18	ICEBERG|UNQ5804|pseudo-ICE	caspase recruitment domain family member 18	protein-coding	1.65	1.29	1.88	7.44	15.37	8.06	7.81	2.40801
chr15	92496522	92497022	intron (NM_013272, intron 2 of 9)	intron (NM_013272, intron 2 of 9)	99242	NR_135775	28232	Hs.311187	NM_013272	ENSG00000176463	SLCO3A1	OATP-D|OATP-RP3|OATP3A1|OATPD|OATPRP3|SLC21A11	solute carrier organic anion transporter family member 3A1	protein-coding	13.39	23.14	8.3	4.12	3.29	1.28	3.47	-2.40596
chr2	237933671	237934171	Intergenic	L2a|LINE|L2	30889	NR_135202	93463	Hs.652810	NR_135202	ENSG00000124835	LOC93463	-	uncharacterized LOC93463	ncRNA	1.83	4.53	1.78	10.6	8.23	16.11	15.44	2.38682
chr1	168812122	168812622	Intergenic	Intergenic	56193	NR_024160	79100	Hs.250624	NR_024160	ENSG00000225826	LINC00626	-	long intergenic non-protein coding RNA 626	ncRNA	1.65	1.29	1.28	7.28	9.06	3.85	8.85	2.80535
chr21	16513855	16514355	Intergenic	Intergenic	-76979	NM_003489	8204	Hs.155017	NM_003489	ENSG00000180530	NRIP1	RIP140	nuclear receptor interacting protein 1	protein-coding	2.38	3.88	2.37	14.4	12.35	11.35	10.06	2.37366
chr9	16267314	16267814	intron (NR_073471, intron 1 of 3)	intron (NR_073471, intron 1 of 3)	8747	NR_073471	100129385	Hs.586441	NM_001271829	ENSG00000205549	C9orf92	Em:AL513424.1	chromosome 9 open reading frame 92	protein-coding	1.47	2.43	1.78	33.87	9.88	3.85	5.73	3.01836
chr4	138882203	138882703	Intergenic	MLT1N2|LTR|ERVL-MaLR	-127715	NR_038380	641364	Hs.570846	NR_038380	ENSG00000250033	SLC7A11-AS1	-	SLC7A11 antisense RNA 1	ncRNA	8.44	14.72	4.25	1.9	1.92	1.46	2.43	-2.47999
chr11	23380777	23381277	Intergenic	Intergenic	59709	NR_107021	102465860		NR_107021	ENSG00000275868	MIR8054	hsa-mir-8054	microRNA 8054	ncRNA	1.28	0.32	1.19	9.02	9.61	5.31	4.51	2.93854
chr6	40682382	40682882	Intergenic	Intergenic	-127429	NM_020737	57497	Hs.250015	NM_020737	ENSG00000156564	LRFN2	FIGLER2|KIAA1246|SALM1	leucine rich repeat and fibronectin type III domain containing 2	protein-coding	3.85	8.74	5.23	31.5	24.97	23.8	37.48	2.46872
chr6	74375523	74376023	Intergenic	Intergenic	-12036	NM_012434	26503	Hs.597422	NM_012434	ENSG00000119899	SLC17A5	AST|ISSD|NSD|SD|SIALIN|SIASD|SLD	solute carrier family 17 member 5	protein-coding	3.12	1.13	1.88	21.05	22.23	10.44	17.52	3.29648
chr17	693202	693702	intron (NM_018146, intron 3 of 3)	intron (NM_018146, intron 3 of 3)	-7881	NM_016080	51031	Hs.279061	NM_016080	ENSG00000167699	GLOD4	C17orf25|CGI-150|HC71	glyoxalase domain containing 4	protein-coding	15.96	37.7	5.14	3.01	2.47	1.83	2.26	-2.77707
chr19	23586249	23586749	intron (NR_126448, intron 4 of 5)	LTR22A|LTR|ERVK	-8137	NM_003430	7644	Hs.58834	NM_003430	ENSG00000167232	ZNF91	HPF7|HTF10	zinc finger protein 91	protein-coding	2.2	2.43	2.47	7.6	14.27	15.75	15.79	2.56216
chr8	141163834	141164334	intron (NM_031466, intron 17 of 22)	L2b|LINE|L2	-53450	NR_144431	359809	Hs.26814	NR_144431		PEG13	-	paternally expressed 13	ncRNA	1.28	3.4	1.88	7.91	12.08	12.82	7.63	2.53014
chr14	70059643	70060143	Intergenic	Intergenic	-18293	NM_001271507	56936	Hs.458319	NM_020181	ENSG00000267909	CCDC177	C14orf162|PLPL	coiled-coil domain containing 177	protein-coding	11.74	21.19	5.93	2.06	1.92	2.01	3.47	-2.54864
chr10	27003710	27004210	intron (NM_014317, intron 5 of 11)	intron (NM_014317, intron 5 of 11)	17607	NM_014317	23590	Hs.558468	NM_014317	ENSG00000148459	PDSS1	COQ1|COQ10D2|DPS|SPS|TPRT|TPT|TPT 1|hDPS1	decaprenyl diphosphate synthase subunit 1	protein-coding	1.65	2.75	2.17	9.5	12.35	12.08	5.9	2.54848
chr8	124969725	124970225	intron (NM_001039112, intron 2 of 40)	intron (NM_001039112, intron 2 of 40)	83048	NR_040044	439941	Hs.683919	NM_001038706	ENSG00000181171	FER1L6-AS1	C8orf54	FER1L6 antisense RNA 1	ncRNA	1.83	5.18	2.77	19.63	13.17	18.49	24.12	2.71522
chr2	182451266	182451766	intron (NM_001030311, intron 2 of 13)	intron (NM_001030311, intron 2 of 13)	70318	NM_001160277	375298	Hs.732358	NM_201548	ENSG00000188452	CERKL	RP26	ceramide kinase like	protein-coding	1.47	1.29	1.98	13.3	13.17	6.59	8.67	2.56696
chr8	53252720	53253220	intron (NM_014682, intron 2 of 25)	intron (NM_014682, intron 2 of 25)	69469	NM_014682	9705	Hs.655499	NM_014682	ENSG00000147488	ST18	NZF3|ZC2H2C3|ZC2HC10|ZNF387	ST18, C2H2C-type zinc finger	protein-coding	1.28	3.88	2.96	17.57	15.37	20.87	17	2.65171
chr2	188554040	188554540	Intergenic	L2b|LINE|L2	-135058	NM_006287	7035	Hs.516578	NM_006287	ENSG00000003436	TFPI	EPI|LACI|TFI|TFPI1	tissue factor pathway inhibitor	protein-coding	1.65	0.32	1.48	11.08	13.17	5.31	8.85	2.68015
chr8	32103695	32104195	intron (NM_013962, intron 1 of 4)	MER31-int|LTR|ERV1	-194317	NR_047475	100874286	Hs.147060	NR_047475	ENSG00000254049	NRG1-IT3	-	NRG1 intronic transcript 3	ncRNA	4.4	9.06	4.64	2.06	0.27	1.1	1.21	-2.56647
chr5	55816638	55817138	intron (NM_001287053, intron 4 of 5)	intron (NM_001287053, intron 4 of 5)	-39292	NR_104664	102467147	Hs.650177	NR_104664	ENSG00000248727	LINC01948	-	long intergenic non-protein coding RNA 1948	ncRNA	10.64	22.49	5.63	2.53	1.1	2.01	3.82	-2.50748
chr20	25317071	25317571	intron (NM_001042472, intron 2 of 12)	intron (NM_001042472, intron 2 of 12)	54297	NM_015600	26090	Hs.441550	NM_015600	ENSG00000100997	ABHD12	ABHD12A|BEM46L2|C20orf22|PHARC|dJ965G21.2	abhydrolase domain containing 12	protein-coding	10.09	19.09	6.02	2.06	1.37	2.75	2.43	-2.44418
chr1	118643495	118643995	intron (NM_206996, intron 5 of 48)	L2c|LINE|L2	84103	NM_206996	200162	Hs.528821	NM_206996	ENSG00000155761	SPAG17	CT143|PF6	sperm associated antigen 17	protein-coding	2.2	3.56	1.58	36.56	29.91	19.04	15.09	3.50177
chr8	66629482	66629982	3' UTR (NM_001242318, exon 13 of 13)	3' UTR (NM_001242318, exon 13 of 13)	47624	NM_001145838	9650	Hs.584788	NM_014637	ENSG00000066855	MTFR1	CHPPR|FAM54A2	mitochondrial fission regulator 1	protein-coding	2.57	3.88	3.85	29.92	17.84	17.94	20.82	2.52121
chr8	62224228	62225045	intron (NM_173519, intron 2 of 5)	intron (NM_173519, intron 2 of 5)	24112	NM_173519	157807	Hs.591874	NM_173519	ENSG00000177182	CLVS1	CRALBPL|RLBP1L1	clavesin 1	protein-coding	3.3	1.46	5.14	25.17	21.96	19.96	9.2	2.66834
chr4	68590813	68591313	Intergenic	Intergenic	24067	NR_015439	550112	Hs.479879	NR_015439	ENSG00000248049	UBA6-AS1	-	UBA6 antisense RNA 1 (head to head)	ncRNA	8.62	18.28	5.93	1.74	2.2	3.11	1.39	-2.52098
chr1	247079709	247080209	intron (NR_136586, intron 2 of 36)	intron (NR_136586, intron 2 of 36)	14767	NM_015446	25909	Hs.300887	NM_015446	ENSG00000153207	AHCTF1	ELYS|MST108|MSTP108|TMBS62	AT-hook containing transcription factor 1	protein-coding	1.1	0	1.48	9.18	5.21	3.48	7.81	2.37127
chr16	22325920	22326420	intron (NR_047581, intron 8 of 20)	intron (NR_047581, intron 8 of 20)	17474	NR_047581	55718	Hs.460298	NM_018119	ENSG00000058600	POLR3E	RPC5|SIN	RNA polymerase III subunit E	protein-coding	15.41	18.77	6.02	2.06	2.2	3.48	4.51	-2.32276
chr14	76298290	76298790	intron (NM_015072, intron 28 of 31)	L2c|LINE|L2	149825	NM_003239	7043	Hs.592317	NM_003239	ENSG00000119699	TGFB3	ARVD|ARVD1|LDS5|RNHF|TGF-beta3	transforming growth factor beta 3	protein-coding	2.38	2.59	1.98	14.4	6.59	9.7	10.93	2.40545
chr1	99340412	99340912	Intergenic	L1MC3|LINE|L1	-129170	NR_033940	100129620	Hs.588631	NR_033940	ENSG00000232825	LOC100129620	-	uncharacterized LOC100129620	ncRNA	0.55	2.43	2.86	14.72	10.98	7.69	4.51	2.3755
chr16	46898151	46898651	Intergenic	AluJr|SINE|Alu	-19891	NM_133443	84706	Hs.460693	NM_133443	ENSG00000166123	GPT2	ALT2|GPT 2|MRT49	glutamic--pyruvic transaminase 2	protein-coding	2.57	1.46	2.57	9.97	10.7	8.24	9.72	2.35277
chr11	132574667	132575167	intron (NM_001319104, intron 1 of 6)	intron (NM_001319104, intron 1 of 6)	238615	NM_001319106	4978	Hs.4817	NM_002545	ENSG00000183715	OPCML	IGLON1|OBCAM|OPCM	opioid binding protein/cell adhesion molecule like	protein-coding	1.47	0.65	1.88	31.18	2.2	1.46	6.25	2.93406
chr5	102846851	102847351	Intergenic	Intergenic	30585	NR_104670	102467212	Hs.641885	NR_104670	ENSG00000248757	LINC02115	-	long intergenic non-protein coding RNA 2115	ncRNA	1.28	0.97	1.48	12.98	4.94	4.94	15.27	2.85943
chr4	57479196	57479696	Intergenic	Intergenic	43242	NM_001145459	84525	Hs.619396	NM_032495	ENSG00000171476	HOPX	CAMEO|HOD|HOP|LAGY|NECC1|OB1|SMAP31|TOTO	HOP homeobox	protein-coding	14.67	31.71	9.38	2.53	2.2	4.58	3.3	-2.72856
chr5	106276636	106277136	intron (NR_104671, intron 2 of 3)	L2c|LINE|L2	69829	NR_104671	102467213	Hs.570923	NR_104671	ENSG00000251027	LINC01950	-	long intergenic non-protein coding RNA 1950	ncRNA	1.1	3.4	3.16	19.94	15.09	9.15	15.44	2.59098
chr4	135096591	135097091	Intergenic	AluSx|SINE|Alu	26062	NM_001114734	132430	Hs.49889	NM_001114734	ENSG00000254535	PABPC4L	-	poly(A) binding protein cytoplasmic 4 like	protein-coding	7.34	12.46	4.54	0.63	1.92	0.37	1.39	-3.18926
chr15	100762198	100762698	intron (NM_139057, intron 7 of 21)	intron (NM_139057, intron 7 of 21)	119762	NM_139057	170691	Hs.513200	NM_139057	ENSG00000140470	ADAMTS17	-	ADAM metallopeptidase with thrombospondin type 1 motif 17	protein-coding	11.37	42.71	8.49	3.64	2.2	2.2	3.12	-2.72748
chr10	119126181	119126681	intron (NM_173791, intron 1 of 4)	MIRb|SINE|MIR	8547	NM_173791	118987	Hs.501149	NM_173791	ENSG00000165650	PDZD8	PDZK8	PDZ domain containing 8	protein-coding	2.02	2.43	1.48	11.87	11.8	8.06	11.97	2.41315
chr12	22428707	22429207	intron (NM_003034, intron 2 of 4)	intron (NM_003034, intron 2 of 4)	58691	NM_001304450	6489	Hs.408614	NM_003034	ENSG00000111728	ST8SIA1	GD3S|SIAT8|SIAT8-A|SIAT8A|ST8SiaI	ST8 alpha-N-acetyl-neuraminide alpha-2,8-sialyltransferase 1	protein-coding	19.44	62.45	12.35	5.22	4.94	4.03	3.99	-2.64547
chr1	239376107	239376607	Intergenic	Intergenic	-173873	NM_001347716	1131	Hs.7138	NM_000740	ENSG00000133019	CHRM3	EGBRS|HM3|PBS	cholinergic receptor muscarinic 3	protein-coding	1.28	2.1	1.98	17.25	9.06	8.42	15.96	2.65853
chr4	38771848	38772348	Intergenic	MLT2A2|LTR|ERVL	12513	NM_001017388	81793	Hs.120551	NM_030956	ENSG00000174123	TLR10	CD290	toll like receptor 10	protein-coding	10.09	21.19	4.44	2.69	1.1	1.28	1.04	-2.94994
chr3	181764074	181764574	Intergenic	Intergenic	94172	NR_104146	100996490	Hs.606987	NR_104146	ENSG00000242512	LINC01206	-	long intergenic non-protein coding RNA 1206	ncRNA	10.64	15.69	6.22	2.22	0.55	1.1	3.47	-2.91161
chr5	74616662	74617162	Intergenic	Intergenic	-16081	NM_000859	3156	Hs.628096	NM_000859	ENSG00000113161	HMGCR	LDLCQ3	3-hydroxy-3-methylglutaryl-CoA reductase	protein-coding	13.02	23.62	5.23	2.22	0.55	2.75	3.99	-2.49144
chr16	54707220	54707720	Intergenic	MER81|DNA|hAT-Blackjack	174675	NR_134971	101927480	Hs.499208	NR_134971	ENSG00000245694	LOC101927480	-	uncharacterized LOC101927480	ncRNA	1.83	0.97	1.38	6.65	6.31	10.8	11.8	2.50563
chr3	18108630	18109130	intron (NM_001257177, intron 4 of 4)	MLT1A1|LTR|ERVL-MaLR	104816	NM_001257177	339862	Hs.652981	NM_001257177		LOC339862	-	uncharacterized LOC339862	protein-coding	12.11	19.09	3.46	2.69	0.82	1.65	1.91	-2.99904
chr4	1909503	1910003	intron (NM_001042424, intron 3 of 21)	intron (NM_001042424, intron 3 of 21)	7400	NM_133334	7468	Hs.113876	NM_007331	ENSG00000109685	NSD2	KMT3F|KMT3G|MMSET|REIIBP|TRX5|WHS|WHSC1	nuclear receptor binding SET domain protein 2	protein-coding	13.76	31.87	4.54	2.22	1.1	2.2	3.47	-2.97887
chr11	57555795	57556295	intron (NM_001085467, intron 1 of 16)	intron (NM_001085467, intron 1 of 16)	26811	NM_001085467	1500	Hs.166011	NM_001331	ENSG00000198561	CTNND1	CAS|CTNND|P120CAS|P120CTN|p120|p120(CAS)|p120(CTN)	catenin delta 1	protein-coding	14.49	16.02	6.81	1.27	2.47	2.38	1.73	-2.78883
chr12	22741669	22742169	TTS (NR_135030)	TTS (NR_135030)	36061	NR_135031	105369691	Hs.556287	NR_135030		LOC105369691	-	uncharacterized LOC105369691	ncRNA	0.73	2.59	1.38	16.62	22.23	13.37	17	3.73527
chr8	33937047	33937547	Intergenic	L2c|LINE|L2	-479673	NM_024025	78986	Hs.8719	NM_024025	ENSG00000133878	DUSP26	DSP-4|DUSP24|LDP-4|MKP-8|MKP8|NATA1|NEAP|SKRP3	dual specificity phosphatase 26	protein-coding	2.02	0.49	2.47	16.46	8.23	7.51	7.63	2.39321
chr1	119901233	119901733	Intergenic	Intergenic	-9916	NM_016527	51179	Hs.659767	NM_016527	ENSG00000116882	HAO2	GIG16|HAOX2	hydroxyacid oxidase 2	protein-coding	12.66	16.34	7.21	2.06	3.84	1.65	1.56	-2.4567
chr9	108080955	108081455	intron (NM_001330731, intron 3 of 15)	intron (NM_001330731, intron 3 of 15)	74311	NM_001286730	23446	Hs.573495	NM_022109	ENSG00000070214	SLC44A1	CD92|CDW92|CHTL1|CTL1	solute carrier family 44 member 1	protein-coding	1.83	2.1	1.88	23.58	17.56	19.96	19.61	3.63202
chr2	74166528	74167028	intron (NM_001318859, intron 2 of 4)	intron (NM_001318859, intron 2 of 4)	12825	NR_134897	1716	Hs.469022	NM_001929	ENSG00000114956	DGUOK	MTDPS3|NCPH|PEOB4|dGK	deoxyguanosine kinase	protein-coding	14.49	33.81	4.84	1.9	0	1.65	1.73	-3.78682
chr6	116269062	116269562	intron (NM_002031, intron 5 of 7)	MLT1F2|LTR|ERVL-MaLR	-90582	NR_027338	728402	Hs.729953	NR_027338		TPI1P3	-	triosephosphate isomerase 1 pseudogene 3	pseudo	1.47	2.75	2.67	16.46	12.62	6.96	10.58	2.5813
chr3	37271121	37271621	Intergenic	Intergenic	-13311	NM_002078	2803	Hs.344151	NM_002078	ENSG00000144674	GOLGA4	CRPF46|GCP2|GOLG|MU-RMS-40.18|p230	golgin A4	protein-coding	1.47	1.94	1.19	8.39	12.08	9.34	10.41	2.59121
chr5	151710440	151710940	Intergenic	MIRb|SINE|MIR	74150	NM_020167	56923	Hs.731911	NM_020167	ENSG00000132911	NMUR2	FM-4|FM4|NMU-R2|NMU2R|TGR-1|TGR1	neuromedin U receptor 2	protein-coding	0.18	0.97	2.67	19.79	6.86	4.58	13.01	2.93358
chr2	225792260	225793045	intron (NM_014689, intron 2 of 55)	intron (NM_014689, intron 2 of 55)	19129	NM_001290263	55619	Hs.46578	NM_014689	ENSG00000135905	DOCK10	DRIP2|Nbla10300|ZIZ3	dedicator of cytokinesis 10	protein-coding	6.6	8.57	5.93	27.38	13.72	9.52	28.28	2.42921
chr14	24353214	24353714	Intergenic	LTR51|LTR|ERV1	-69480	NM_001282988	10901	Hs.528385	NM_021004	ENSG00000157326	DHRS4	CR|NRDR|PHCR|PSCD|SCAD-SRL|SDR-SRL|SDR25C1|SDR25C2	dehydrogenase/reductase 4	protein-coding	1.65	1.62	1.78	8.71	10.43	7.51	9.02	2.38686
chr7	107773055	107773555	Intergenic	Intergenic	-2504	NM_001318048	22798	Hs.62022	NM_007356	ENSG00000091128	LAMB4	-	laminin subunit beta 4	protein-coding	15.41	23.46	7.11	2.53	1.1	3.11	0.87	-2.90027
chr1	202198346	202198846	intron (NM_001017404, intron 3 of 15)	intron (NM_001017404, intron 3 of 15)	15313	NM_001017404	59352	Hs.497402	NM_021636	ENSG00000133067	LGR6	GPCR|VTS20631	leucine rich repeat containing G protein-coupled receptor 6	protein-coding	11.01	30.58	7.11	3.96	2.47	2.01	3.3	-2.37217
chr21	18834691	18835191	Intergenic	Intergenic	23733	NR_037585	100505929	Hs.46707	NM_001005521	ENSG00000232560	LINC01549	C21orf37	long intergenic non-protein coding RNA 1549	ncRNA	3.67	1.13	1.28	34.98	25.52	17.21	20.99	3.53506
chr6	106944587	106945087	Intergenic	Intergenic	-14893	NM_001624	202	Hs.724262	NM_001624	ENSG00000112297	AIM1	CRYBG1|ST4	absent in melanoma 1	protein-coding	8.8	23.78	5.63	1.74	2.2	1.28	0.69	-2.8958
chr11	9532276	9532776	intron (NM_003442, intron 12 of 15)	intron (NM_003442, intron 12 of 15)	50014	NM_001282656	7702	Hs.523471	NM_003442	ENSG00000166478	ZNF143	SBF|STAF|pHZ-1	zinc finger protein 143	protein-coding	1.47	2.1	0.3	8.86	9.88	6.23	12.49	3.18397
chr17	8435370	8435870	intron (NM_001256012, intron 16 of 42)	intron (NM_001256012, intron 16 of 42)	96450	NM_030808	81565	Hs.372123	NM_030808	ENSG00000166579	NDEL1	EOPA|MITAP1|NDE1L1|NDE2|NUDEL	nudE neurodevelopment protein 1 like 1	protein-coding	2.93	2.27	2.67	13.45	20.58	14.28	15.09	2.73565
chr2	30440421	30441167	Intergenic	Intergenic	-13603	NM_030915	81606	Hs.567598	NM_030915	ENSG00000213626	LBH	-	limb bud and heart development	protein-coding	5.69	12.62	7.01	38.94	38.97	31.13	38.17	2.4876
chr3	151976090	151976590	Intergenic	Intergenic	-9917	NM_001314057	4154	Hs.201858	NM_021038	ENSG00000152601	MBNL1	EXP|MBNL	muscleblind like splicing regulator 1	protein-coding	7.52	19.58	5.63	2.85	1.1	1.65	2.95	-2.33588
chr11	100646848	100647348	intron (NM_152432, intron 2 of 23)	intron (NM_152432, intron 2 of 23)	-88412	NR_133571	100128386	Hs.635125	NR_133571	ENSG00000248027	LOC100128386	-	uncharacterized LOC100128386	ncRNA	3.49	2.59	2.07	24.69	24.43	18.86	21.86	3.1195
chr7	97685795	97686295	Intergenic	Intergenic	-50152	NM_014916	22853	Hs.444179	NM_014916	ENSG00000164715	LMTK2	AATYK2|BREK|KPI-2|KPI2|LMR2|PPP1R100|cprk|hBREK	lemur tyrosine kinase 2	protein-coding	14.67	20.22	8.99	3.48	4.12	2.93	2.08	-2.34971
chr2	182484097	182484597	intron (NM_001030311, intron 1 of 13)	intron (NM_001030311, intron 1 of 13)	37487	NM_001160277	375298	Hs.732358	NM_201548	ENSG00000188452	CERKL	RP26	ceramide kinase like	protein-coding	1.47	0.16	2.27	11.24	20.31	7.14	6.07	2.72085
chr1	223829173	223829673	intron (NM_001143962, intron 2 of 16)	L2|LINE|L2	24013	NM_001143962	388743	Hs.291487	NM_001143962	ENSG00000203697	CAPN8	nCL-2	calpain 8	protein-coding	2.38	3.24	2.47	19.15	17.02	10.44	12.14	2.65016
chr6	10048595	10049095	Intergenic	Intergenic	-363706	NR_033910	100130275	Hs.661431	NR_033910		TFAP2A-AS1	-	TFAP2A antisense RNA 1	ncRNA	2.57	1.46	2.57	20.26	12.62	7.69	14.23	2.43922
chr17	30948559	30949059	intron (NM_001303279, intron 20 of 21)	MLT1A|LTR|ERVL-MaLR	134704	NM_003885	8851	Hs.500015	NM_003885	ENSG00000176749	CDK5R1	CDK5P35|CDK5R|NCK5A|p23|p25|p35|p35nck5a	cyclin dependent kinase 5 regulatory subunit 1	protein-coding	15.23	14.56	4.05	2.69	2.2	1.46	2.26	-2.49367
chr2	3352489	3353407	intron (NM_001330530, intron 2 of 9)	intron (NM_001330530, intron 2 of 9)	28755	NM_001330531	7260	Hs.502770	NM_003310	ENSG00000032389	TSSC1	EIPR1	tumor suppressing subtransferable candidate 1	protein-coding	18.16	42.87	16	7.12	4.39	4.94	5.38	-2.37693
chr5	118272979	118273479	intron (NM_173666, intron 3 of 5)	MER73|LTR|ERVL	-37052	NR_036262	100422885		NR_036262	ENSG00000283498	MIR1244-2	-	microRNA 1244-2	ncRNA	1.47	2.91	0.69	7.28	6.59	8.24	12.49	2.68985
chr6	52193004	52193504	Intergenic	Intergenic	-33672	NM_133367	85315	Hs.239388	NM_133367	ENSG00000170915	PAQR8	C6orf33|LMPB1|MPRB	progestin and adipoQ receptor family member 8	protein-coding	3.67	2.59	2.77	16.78	15.37	13.55	23.08	2.36015
chr2	108917893	108918393	intron (NM_176825, intron 5 of 8)	L2c|LINE|L2	13048	NM_176825	6819	Hs.436123	NM_001056	ENSG00000198203	SULT1C2	ST1C1|ST1C2|SULT1C1|humSULTC2	sulfotransferase family 1C member 2	protein-coding	1.1	1.29	1.88	16.46	17.02	24.35	33.66	3.97774
chr11	123461202	123461702	intron (NM_001330396, intron 4 of 19)	intron (NM_001330396, intron 4 of 19)	30482	NM_001286564	57476	Hs.144725	NM_020716	ENSG00000023171	GRAMD1B	-	GRAM domain containing 1B	protein-coding	5.87	8.25	8.39	56.51	50.22	30.03	31.06	2.43
chr5	111066723	111067223	intron (NM_001142474, intron 3 of 3)	intron (NM_001142474, intron 3 of 3)	24975	NM_001142483	9315	Hs.36053	NM_004772	ENSG00000134986	NREP	C5orf13|D4S114|P311|PRO1873|PTZ17|SEZ17	neuronal regeneration related protein	protein-coding	1.83	2.1	1.19	14.4	12.35	4.21	4.51	2.53724
chr9	2170689	2171189	intron (NM_003070, intron 29 of 33)	intron (NM_003070, intron 29 of 33)	12483	NM_001289400	6595	Hs.298990	NM_003070	ENSG00000080503	SMARCA2	BAF190|BRM|NCBRS|SNF2|SNF2L2|SNF2LA|SWI2|Sth1p|hBRM|hSNF2a	SWI/SNF related, matrix associated, actin dependent regulator of chromatin, subfamily a, member 2	protein-coding	17.06	34.3	8.89	3.96	1.65	2.56	2.26	-2.95294
chr12	26922104	26922604	intron (NM_002223, intron 2 of 56)	intron (NM_002223, intron 2 of 56)	63777	NM_002223	3709	Hs.512235	NM_002223	ENSG00000123104	ITPR2	ANHD|CFAP48|INSP3R2|IP3R2	inositol 1,4,5-trisphosphate receptor type 2	protein-coding	0.73	1.94	1.88	12.66	11.25	7.14	10.76	3.22774
chr18	49965744	49966244	intron (NM_005215, intron 1 of 28)	intron (NM_005215, intron 1 of 28)	99452	NM_005215	1630	Hs.162025	NM_005215	ENSG00000187323	DCC	CRC18|CRCR1|IGDCC1|MRMV1|NTN1R1	DCC netrin 1 receptor	protein-coding	0.92	1.78	0.89	16.78	5.49	4.03	9.72	3.11101
chr11	66453795	66454610	intron (NM_006946, intron 35 of 36)	intron (NM_006946, intron 35 of 36)	-8811	NM_001286135	83759	Hs.618713	NM_031492	ENSG00000173914	RBM4B	RBM30|RBM4L|ZCCHC15|ZCCHC21B|ZCRB3B	RNA binding motif protein 4B	protein-coding	36.5	101.28	12.94	2.22	4.67	8.79	6.77	-2.78078
chr15	25726485	25726985	Intergenic	Intergenic	-42560	NM_130839	7337	Hs.598862	NM_000462	ENSG00000114062	UBE3A	ANCR|AS|E6-AP|EPVE6AP|HPVE6A	ubiquitin protein ligase E3A	protein-coding	21.46	48.21	9.68	4.91	6.04	4.21	4.86	-2.35948
chr15	48677626	48678126	Intergenic	Intergenic	53511	NM_001948	1854	Hs.527980	NM_001948	ENSG00000128951	DUT	dUTPase	deoxyuridine triphosphatase	protein-coding	11.56	22.81	5.33	1.42	1.37	1.83	1.56	-3.16559
chr3	160385244	160385744	Intergenic	L2b|LINE|L2	-9454	NM_025047	80117	Hs.287702	NM_025047	ENSG00000179674	ARL14	ARF7	ADP ribosylation factor like GTPase 14	protein-coding	2.38	1.46	1.98	14.4	19.21	8.79	14.75	2.91335
chr3	170719951	170720451	intron (NM_001278659, intron 7 of 9)	intron (NM_001278659, intron 7 of 9)	24567	NM_001278658	6514	Hs.167584	NM_000340	ENSG00000163581	SLC2A2	GLUT2	solute carrier family 2 member 2	protein-coding	1.83	1.78	1.98	14.72	16.47	12.82	17.35	2.8615
chr4	174307383	174307883	Intergenic	Intergenic	12764	NM_007281	11341	Hs.7122	NM_007281	ENSG00000164106	SCRG1	SCRG-1	stimulator of chondrogenesis 1	protein-coding	1.1	1.78	1.09	4.75	9.88	5.49	13.88	2.5627
chr12	107370002	107370502	TTS (NM_025198)	TTS (NM_025198)	10692	NM_025198	80298	Hs.5009	NM_025198	ENSG00000120832	MTERF2	MTERFD3|mTERFL	mitochondrial transcription termination factor 2	protein-coding	2.02	2.91	1.98	5.86	12.9	8.42	13.01	2.41651
chr8	1878691	1879191	intron (NM_001308153, intron 26 of 29)	intron (NM_001308153, intron 26 of 29)	-40622	NR_126346	104266957	Hs.734498	NR_126346	ENSG00000253696	KBTBD11-OT1	-	KBTBD11 overlapping transcript 1	ncRNA	4.04	7.44	3.75	38.94	37.05	44.31	42.16	3.02088
chr7	89401537	89402037	Intergenic	Intergenic	-346927	NR_003551	442523	Hs.406964	NR_003551	ENSG00000235436	DPY19L2P4	-	DPY19L2 pseudogene 4	pseudo	1.1	0.32	0.2	18.36	11.25	5.31	8.5	4.0221
chr14	91686837	91687337	intron (NM_001286471, intron 13 of 13)	intron (NM_001286471, intron 13 of 13)	23765	NM_001177676	8111	Hs.8882	NM_003485	ENSG00000119714	GPR68	AI2A6|GPR12A|OGR1	G protein-coupled receptor 68	protein-coding	25.5	67.63	10.96	2.85	1.37	4.58	4.68	-3.07202
chr2	3976980	3977480	Intergenic	Intergenic	44392	NR_037881	100505964	Hs.190267	NR_037881	ENSG00000237401	LINC01304	-	long intergenic non-protein coding RNA 1304	ncRNA	0.92	3.07	2.96	11.24	18.39	4.58	14.05	2.47025
chr10	77561971	77562471	intron (NM_032024, intron 1 of 5)	intron (NM_032024, intron 1 of 5)	19702	NM_032024	83938	Hs.118161	NM_032024	ENSG00000148655	C10orf11	CDA017	chromosome 10 open reading frame 11	protein-coding	1.28	0.49	1.98	9.81	12.35	3.48	11.8	2.8128
chr18	30764099	30764599	intron (NM_198995, intron 19 of 21)	intron (NM_198995, intron 19 of 21)	255696	NM_001308126	374864	Hs.115461	NM_198995	ENSG00000166960	CCDC178	C18orf34	coiled-coil domain containing 178	protein-coding	1.65	0.97	1.78	10.45	12.9	7.51	12.49	2.66803
chr1	231162831	231163331	intron (NM_198552, intron 1 of 1)	intron (NM_198552, intron 1 of 1)	-7411	NR_031593	100302132		NR_031593	ENSG00000182118	MIR1182	MIRN1182|hsa-mir-1182	microRNA 1182	ncRNA	10.46	27.5	7.51	3.48	1.65	2.2	2.43	-2.5598
chr20	22471368	22471868	Intergenic	Intergenic	-70337	NR_027089	284788	Hs.651993	NR_027089	ENSG00000204684	LOC284788	-	uncharacterized LOC284788	ncRNA	1.65	6.8	2.96	23.11	14.55	19.23	20.13	2.71884
chr20	23080976	23081476	Intergenic	Intergenic	-14249	NM_012072	22918	Hs.97199	NM_012072	ENSG00000125810	CD93	C1QR1|C1qR(P)|C1qRP|CDw93|ECSM3|MXRA4|dJ737E23.1	CD93 molecule	protein-coding	18.16	37.37	7.6	3.01	3.29	4.21	2.08	-2.6317
chr13	78641376	78641876	intron (NR_047001, intron 1 of 5)	intron (NR_047001, intron 1 of 5)	12636	NR_047001	100874222	Hs.493062	NR_047001	ENSG00000234377	RNF219-AS1	POU4F1-AS1	RNF219 antisense RNA 1	ncRNA	1.47	0.97	1.09	22.79	20.58	11.17	11.1	3.56489
chr12	115912424	115912924	Intergenic	Intergenic	673785	NR_030351	693205		NR_030351	ENSG00000207967	MIR620	MIRN620|hsa-mir-620	microRNA 620	ncRNA	3.3	2.59	3.65	12.82	18.66	22.34	16.83	2.47532
chr12	71557026	71557526	Intergenic	Intergenic	-5497	NM_004616	7103	Hs.170563	NM_004616	ENSG00000127324	TSPAN8	CO-029|TM4SF3	tetraspanin 8	protein-coding	0.37	1.13	1.58	22	18.11	16.11	18.56	4.18423
chr16	47769045	47769545	Intergenic	Intergenic	-123197	NR_110650	101927132	Hs.589404	NR_110650	ENSG00000261231	LINC02133	-	long intergenic non-protein coding RNA 2133	ncRNA	2.02	1.13	2.67	33.56	22.5	15.01	13.36	3.44459
chr4	11733753	11734253	Intergenic	Intergenic	-303466	NM_005114	9957	Hs.507348	NM_005114	ENSG00000002587	HS3ST1	3OST|3OST1	heparan sulfate-glucosamine 3-sulfotransferase 1	protein-coding	0.37	3.4	2.17	28.02	11.53	14.46	19.95	3.36285
chr2	86876259	86876759	intron (NM_001198954, intron 2 of 7)	L1MEc|LINE|L1	-25509	NM_005667	7844	Hs.469199	NM_005667	ENSG00000239305	RNF103	HKF-1|KF-1|KF1|ZFP-103|ZFP103	ring finger protein 103	protein-coding	2.57	2.43	1.19	12.03	13.45	10.8	20.13	2.87782
chr8	124965197	124965697	intron (NM_001039112, intron 1 of 40)	intron (NM_001039112, intron 1 of 40)	87576	NR_040044	439941	Hs.683919	NM_001038706	ENSG00000181171	FER1L6-AS1	C8orf54	FER1L6 antisense RNA 1	ncRNA	2.2	2.43	2.57	11.87	9.88	14.65	23.08	2.74796
chr22	47022939	47023735	intron (NM_015124, intron 2 of 18)	intron (NM_015124, intron 2 of 18)	7038	NM_015124	23151	Hs.475150	NM_015124	ENSG00000075240	GRAMD4	DIP|dA59H18.1|dJ439F8.1	GRAM domain containing 4	protein-coding	37.42	47.24	10.07	4.75	4.39	4.94	6.59	-2.7904
chr9	92776632	92777132	Intergenic	Intergenic	8935	NR_036253	100422963		NR_036253	ENSG00000263967	MIR4290	-	microRNA 4290	ncRNA	11.56	21.68	5.93	3.8	1.65	1.65	2.6	-2.45679
chr15	80977037	80977537	Intergenic	Intergenic	-10365	NM_021214	58489	Hs.459072	NM_021214	ENSG00000136379	ABHD17C	FAM108C1	abhydrolase domain containing 17C	protein-coding	1.28	1.62	1.98	5.86	11.25	8.97	15.27	2.61024
chr3	193561701	193562201	Intergenic	Intergenic	150076	NR_027764	100128023	Hs.730112	NR_027764		DPPA2P3	-	developmental pluripotency associated 2 pseudogene 3	pseudo	3.49	1.46	1.68	16.46	15.92	8.79	14.57	2.71668
chr17	5679408	5679908	intron (NR_040000, intron 1 of 3)	MLT1H|LTR|ERVL-MaLR	4104	NR_040000	339166	Hs.736088	NR_040000	ENSG00000179314	LOC339166	-	uncharacterized LOC339166	ncRNA	11.56	21.36	4.54	3.8	2.47	2.01	1.21	-2.64972
chr1	105340567	105341067	Intergenic	ERV3-16A3_I-int|LTR|ERVL	725172	NR_033990	100129138	Hs.514487	NR_033990	ENSG00000215869	LOC100129138	-	THAP domain containing, apoptosis associated protein 3 pseudogene	pseudo	1.47	0.97	1.78	9.5	12.62	6.77	4.68	2.32473
chr12	83908101	83908601	Intergenic	Intergenic	827417	NM_001320321	160335	Hs.577775	NM_152588	ENSG00000179104	TMTC2	IBDBP1	transmembrane and tetratricopeptide repeat containing 2	protein-coding	1.65	1.78	1.09	13.93	10.15	10.44	11.45	3.18373
chr3	164857610	164858110	Intergenic	L1PA5|LINE|L1	55930	NM_001318810	22865	Hs.101745	NM_014926	ENSG00000121871	SLITRK3	-	SLIT and NTRK like family member 3	protein-coding	1.28	2.91	4.15	18.68	13.45	7.32	15.79	2.40486
chr7	1099060	1099726	TTS (NM_001303473)	TTS (NM_001303473)	4482	NM_001303474	115330	Hs.585007	NM_138445	ENSG00000164849	GPR146	PGR8	G protein-coupled receptor 146	protein-coding	25.86	74.58	5.83	7.76	9.88	5.49	7.63	-2.72658
chr10	71135084	71135948	intron (NM_001322365, intron 12 of 22)	intron (NM_001322365, intron 12 of 22)	41158	NM_001057	6865	Hs.88372	NM_001057	ENSG00000075073	TACR2	NK2R|NKNAR|SKR|TAC2R	tachykinin receptor 2	protein-coding	29.53	77.66	13.63	7.6	4.94	3.48	8.5	-2.50335
chr4	69598486	69599141	Intergenic	MER61F|LTR|ERV1	-62320	NM_001076	7366	Hs.150207	NM_001076	ENSG00000196620	UGT2B15	HLUG4|UDPGT 2B8|UDPGT2B15|UDPGTH3|UGT2B8	UDP glucuronosyltransferase family 2 member B15	protein-coding	2.93	1.78	3.16	19.47	22.5	13.55	25.16	3.23736
chr9	97864176	97864676	intron (NM_001243743, intron 14 of 14)	intron (NM_001243743, intron 14 of 14)	-16050	NR_036109	100422842		NR_036109	ENSG00000207617	MIR3074	mir-3074	microRNA 3074	ncRNA	17.98	32.03	5.73	1.74	2.2	3.66	1.21	-2.93634
chrX	53162456	53162956	intron (NR_110456, intron 2 of 2)	intron (NR_110456, intron 2 of 2)	39367	NR_110456	102723508	Hs.633244	NR_110456		KANTR	LINC01155|Spasm	KDM5C adjacent non-coding transcript	ncRNA	6.42	16.02	3.26	1.74	1.1	1.28	1.21	-2.725
chr2	48274510	48275010	Intergenic	MLT2F|LTR|ERVL	-141828	NM_001190274	80204	Hs.352677	NM_012167	ENSG00000138081	FBXO11	FBX11|PRMT9|UBR6|UG063H01|VIT1	F-box protein 11	protein-coding	11.56	15.69	3.36	1.27	3.02	1.65	0.69	-2.45069
chr11	39563385	39563885	Intergenic	L1M3b|LINE|L1	751045	NR_047674	57689	Hs.745123	NM_020929	ENSG00000148948	LRRC4C	NGL-1|NGL1	leucine rich repeat containing 4C	protein-coding	2.75	4.37	3.56	22.48	4.94	14.1	30.19	2.62684
chr5	36522223	36522723	Intergenic	Intergenic	-83984	NM_001166696	6507	Hs.481918	NM_004172	ENSG00000079215	SLC1A3	EA6|EAAT1|GLAST|GLAST1	solute carrier family 1 member 3	protein-coding	10.46	33	7.11	2.69	2.74	3.85	1.56	-2.40344
chr1	56897828	56898328	Intergenic	Intergenic	147179	NM_003713	8613	Hs.405156	NM_003713	ENSG00000162407	PLPP3	Dri42|LPP3|PAP2B|PPAP2B|VCIP	phospholipid phosphatase 3	protein-coding	16.33	26.7	5.93	3.64	2.47	2.01	1.91	-2.96
chr14	25510547	25511047	intron (NM_001304476, intron 1 of 6)	intron (NM_001304476, intron 1 of 6)	7409	NM_001304477	29091	Hs.508958	NM_014178	ENSG00000168952	STXBP6	HSPC156|amisyn	syntaxin binding protein 6	protein-coding	2.93	1.94	1.09	13.77	10.7	7.87	19.26	2.72352
chr12	89900934	89901434	intron (NM_172240, intron 2 of 11)	intron (NM_172240, intron 2 of 11)	17399	NM_003774	8693	Hs.25130	NM_003774	ENSG00000257594	GALNT4	GALNAC-T4|GALNACT4	polypeptide N-acetylgalactosaminyltransferase 4	protein-coding	2.2	2.59	0.99	14.72	9.88	8.79	14.75	2.67825
chr2	175837226	175837726	intron (NR_038133, intron 1 of 11)	intron (NR_038133, intron 1 of 11)	32505	NM_001822	1123	Hs.380138	NM_001822	ENSG00000128656	CHN1	ARHGAP2|CHN|DURS2|NC|RHOGAP2	chimerin 1	protein-coding	1.83	0.49	1.68	7.44	10.7	6.23	4.86	2.3412
chr11	60425816	60426316	intron (NR_026946, intron 5 of 6)	intron (NR_026946, intron 5 of 6)	-40981	NM_031457	83661	Hs.150878	NM_031457	ENSG00000166959	MS4A8	4SPAN4|CD20L5|MS4A4|MS4A8B	membrane spanning 4-domains A8	protein-coding	0.73	2.43	2.86	17.89	4.67	4.94	11.45	2.60457
chr18	2147857	2148357	Intergenic	MLT1H2|LTR|ERVL-MaLR	423395	NM_022840	64863	Hs.126888	NM_022840	ENSG00000101574	METTL4	HsT661	methyltransferase like 4	protein-coding	12.66	26.7	6.91	1.58	2.74	3.48	2.08	-2.78287
chr9	79920471	79920971	intron (NM_001018037, intron 33 of 70)	intron (NM_001018037, intron 33 of 70)	-127888	NR_026668	100286938	Hs.662256	NR_026668	ENSG00000232998	VPS13A-AS1	-	VPS13A antisense RNA 1	ncRNA	13.02	18.28	4.54	1.11	1.65	2.75	0.69	-3.01139
chr15	34358076	34358576	Intergenic	Intergenic	-27023	NM_020371	57099	Hs.555966	NM_020371	ENSG00000169857	AVEN	PDCD12	apoptosis and caspase activation inhibitor	protein-coding	11.37	23.62	5.63	1.27	1.92	3.11	1.21	-2.88206
chr6	78544247	78544747	intron (NM_001282136, intron 4 of 4)	LTR22B|LTR|ERVK	181726	NM_001322247	101928601	Hs.544538	NM_001282136	ENSG00000269964	MEI4	-	meiotic double-stranded break formation protein 4	protein-coding	2.75	2.1	2.07	18.84	20.31	12.27	8.85	2.64917
chr1	201258656	201259156	intron (NM_001005337, intron 1 of 13)	intron (NM_001005337, intron 1 of 13)	6326	NM_000299	5317	Hs.497350	NM_000299	ENSG00000081277	PKP1	B6P	plakophilin 1	protein-coding	18.16	29.93	6.52	3.48	3.29	2.93	3.47	-2.42929
chr18	20681659	20682159	Intergenic	Intergenic	-32619	NM_001256438	91768	Hs.11108	NM_138375	ENSG00000134508	CABLES1	CABL1|CABLES|HsT2563|IK3-1	Cdk5 and Abl enzyme substrate 1	protein-coding	1.47	0.97	1.28	9.81	9.88	5.49	15.27	3.0796
chr1	64206107	64206607	Intergenic	L1MA3|LINE|L1	-33333	NM_005012	4919	Hs.128753	NM_005012	ENSG00000185483	ROR1	NTRKR1|dJ537F10.1	receptor tyrosine kinase like orphan receptor 1	protein-coding	8.07	25.4	8	2.06	0.82	2.01	3.3	-2.6216
chr8	129283756	129284256	Intergenic	Intergenic	121644	NR_031613	100302281		NR_031613	ENSG00000221261	MIR1208	MIRN1208|hsa-mir-1208	microRNA 1208	ncRNA	2.75	1.13	1.68	7.76	11.8	14.28	8.15	2.40063
chr15	68998516	68999016	intron (NM_001190456, intron 3 of 11)	intron (NM_001190456, intron 3 of 11)	64924	NM_001324015	10391	Hs.551213	NM_006091	ENSG00000103647	CORO2B	CLIPINC	coronin 2B	protein-coding	9.72	15.37	6.32	2.06	1.37	2.2	2.08	-2.54119
chr20	52956706	52957206	Intergenic	Intergenic	132454	NM_002623	5203	Hs.91161	NM_002623	ENSG00000101132	PFDN4	C1|PFD4	prefoldin subunit 4	protein-coding	1.1	2.27	1.88	11.71	6.59	5.49	7.63	2.35291
chr1	73312240	73312740	Intergenic	Intergenic	-459363	NR_110677	101927295	Hs.436589	NR_110676	ENSG00000233973	LINC01360	-	long intergenic non-protein coding RNA 1360	ncRNA	1.1	1.29	1.98	20.89	4.67	1.65	15.61	2.50231
chr4	92934567	92935067	Intergenic	LTR22B|LTR|ERVK	263636	NR_125920	101929194	Hs.626389	NR_125920		LNCPRESS2	-	lncRNA p53 regulated and ESC associated 2	ncRNA	3.12	2.27	1.98	18.36	24.15	13.37	17.18	2.8424
chr3	156052899	156053399	intron (NM_172159, intron 1 of 13)	intron (NM_172159, intron 1 of 13)	44323	NM_001308222	7881	Hs.654519	NM_003471	ENSG00000169282	KCNAB1	AKR6A3|KCNA1B|KV-BETA-1|Kvb1.3|hKvBeta3|hKvb3	potassium voltage-gated channel subfamily A member regulatory beta subunit 1	protein-coding	3.12	2.43	1.28	14.4	16.47	10.8	11.45	2.53792
chr2	211381820	211382478	intron (NM_001122633, intron 1 of 38)	intron (NM_001122633, intron 1 of 38)	-39174	NM_001875	1373	Hs.149252	NM_001875	ENSG00000021826	CPS1	CPSASE1|PHN	carbamoyl-phosphate synthase 1	protein-coding	1.28	0.97	1.98	12.66	29.91	16.85	11.97	3.31744
chr3	152530103	152530603	Intergenic	Intergenic	-22129	NM_002563	5028	Hs.79881	NM_002563	ENSG00000169860	P2RY1	P2Y1	purinergic receptor P2Y1	protein-coding	1.1	0.97	1.78	9.97	7.96	5.49	6.07	2.68182
chr1	183962210	183962710	intron (NM_001303421, intron 1 of 11)	intron (NM_001303421, intron 1 of 11)	44444	NM_001303420	23127	Hs.387995	NM_015101	ENSG00000198756	COLGALT2	C1orf17|GLT25D2	collagen beta(1-O)galactosyltransferase 2	protein-coding	1.47	2.27	2.37	14.09	14	6.96	12.84	2.73348
chr11	94867622	94868122	Intergenic	Intergenic	-15831	NR_110303	101929295	Hs.735838	NR_110303	ENSG00000245552	LOC101929295	-	uncharacterized LOC101929295	ncRNA	13.57	27.83	6.52	2.22	2.47	0.92	2.6	-3.15553
chr1	109805815	109806647	intron (NM_001408, intron 8 of 33)	intron (NM_001408, intron 8 of 33)	13590	NM_001408	1952	Hs.57652	NM_001408	ENSG00000143126	CELSR2	ADGRC2|CDHF10|EGFL2|Flamingo1|MEGF3	cadherin EGF LAG seven-pass G-type receptor 2	protein-coding	37.79	107.59	18.37	18.52	21.68	15.75	25.85	-2.43729
chr3	188572224	188572724	intron (NM_001167671, intron 8 of 10)	intron (NM_001167671, intron 8 of 10)	92954	NR_046873	100874043	Hs.616287	NR_046873	ENSG00000234076	TPRG1-AS1	-	TPRG1 antisense RNA 1	ncRNA	11.01	26.21	4.74	0.79	0.82	3.48	2.43	-2.63695
chr2	30009204	30009704	intron (NM_004304, intron 1 of 28)	L2c|LINE|L2	135023	NM_004304	238	Hs.654469	NM_004304	ENSG00000171094	ALK	CD246|NBLST3	anaplastic lymphoma receptor tyrosine kinase	protein-coding	0.92	1.46	1.38	8.71	8.51	6.96	8.85	2.82267
chr18	55691326	55691826	Intergenic	Intergenic	-20034	NM_015277	23327	Hs.185677	NM_015277	ENSG00000049759	NEDD4L	NEDD4-2|NEDD4.2|PVNH7|RSP5|hNEDD4-2	neural precursor cell expressed, developmentally down-regulated 4-like, E3 ubiquitin protein ligase	protein-coding	1.1	1.62	0.99	6.81	7.14	6.96	5.2	2.39316
chr16	8569054	8569554	Intergenic	Intergenic	18524	NM_001290098	283953	Hs.150849	NM_001146336	ENSG00000232258	TMEM114	-	transmembrane protein 114	protein-coding	0	3.56	1.48	12.03	5.76	7.51	8.5	2.56205
chrX	135357678	135358178	Intergenic	Intergenic	-19287	NM_001173516	79649	Hs.446275	NM_024597	ENSG00000129680	MAP7D3	MDP3	MAP7 domain containing 3	protein-coding	1.83	5.5	1.28	15.67	17.56	7.87	17	2.68733
chr2	95999674	96000174	intron (NM_013434, intron 2 of 8)	intron (NM_013434, intron 2 of 8)	-12844	NM_001034914	30818	Hs.437376	NM_013434	ENSG00000115041	KCNIP3	CSEN|DREAM|KCHIP3	potassium voltage-gated channel interacting protein 3	protein-coding	6.42	23.78	8.2	3.01	1.37	3.85	0.87	-2.60152
chr8	39956370	39956870	Intergenic	Intergenic	-54367	NM_020130	56892	Hs.591849	NM_020130	ENSG00000176907	C8orf4	TC-1|TC1	chromosome 8 open reading frame 4	protein-coding	3.3	3.24	2.27	9.02	12.08	14.83	18.04	2.41031
chr17	38646579	38647079	intron (NM_032865, intron 2 of 12)	intron (NM_032865, intron 2 of 12)	11025	NM_032865	84951	Hs.438292	NM_032865	ENSG00000131746	TNS4	CTEN|PP14434	tensin 4	protein-coding	18.71	33.65	7.8	1.42	1.1	3.85	3.47	-2.8279
chr13	33787514	33788014	intron (NM_001243476, intron 5 of 17)	intron (NM_001243476, intron 5 of 17)	-7577	NM_001243474	90627	Hs.156551	NM_052851	ENSG00000133121	STARD13	ARHGAP37|DLC2|GT650|LINC00464	StAR related lipid transfer domain containing 13	protein-coding	11.37	14.24	6.22	1.27	2.2	2.01	2.43	-2.50663
chr9	95532641	95533341	Intergenic	Intergenic	-5908	NM_001003800	23299	Hs.436939	NM_015250	ENSG00000185963	BICD2	SMALED2|bA526D8.1	BICD cargo adaptor 2	protein-coding	25.86	79.44	12.54	8.07	8.78	5.86	5.55	-2.62384
chr8	62718013	62718513	Intergenic	ERVL-E-int|LTR|ERVL	90916	NR_039680	100616484		NR_039680	ENSG00000264408	MIR4470	mir-4470	microRNA 4470	ncRNA	1.65	2.59	2.86	9.81	10.98	8.97	13.01	2.39332
chrX	120732190	120732690	Intergenic	MLT2A2|LTR|ERVL	227614	NR_037444	100500869		NR_037444	ENSG00000265456	MIR3672	-	microRNA 3672	ncRNA	0.92	2.91	1.38	8.07	4.94	8.61	6.42	2.37543
chr2	210296361	210296861	intron (NM_001039538, intron 1 of 14)	intron (NM_001039538, intron 1 of 14)	7840	NM_001039538	4133	Hs.368281	NM_002374	ENSG00000078018	MAP2	MAP2A|MAP2B|MAP2C	microtubule associated protein 2	protein-coding	11.37	22.81	6.52	3.48	4.67	1.65	1.21	-2.35115
chr4	149460567	149461067	Intergenic	LTR33|LTR|ERVL	-97145	NM_001166104	4306	Hs.163924	NM_000901	ENSG00000151623	NR3C2	MCR|MLR|MR|NR3C2VIT	nuclear receptor subfamily 3 group C member 2	protein-coding	1.28	1.46	2.17	10.29	13.17	7.69	12.49	2.58514
chr13	52130822	52131322	Intergenic	L2c|LINE|L2	4347	NR_039852	100616423		NR_039852	ENSG00000266611	MIR4703	-	microRNA 4703	ncRNA	9.91	22.33	6.81	2.37	2.47	1.65	1.91	-2.88928
chr9	95417177	95417677	intron (NM_022755, intron 3 of 12)	intron (NM_022755, intron 3 of 12)	15120	NM_022755	64768	Hs.459896	NM_022755	ENSG00000127080	IPPK	C9orf12|INSP5K2|IP5K|IPK1|bA476B13.1	inositol-pentakisphosphate 2-kinase	protein-coding	21.1	56.63	10.86	3.32	5.21	2.38	2.78	-2.86377
chr7	122849756	122850256	Intergenic	MER49|LTR|ERV1	-9981	NM_022444	6561	Hs.489849	NM_022444	ENSG00000081800	SLC13A1	NAS1|NaSi-1	solute carrier family 13 member 1	protein-coding	2.38	1.13	3.36	19.79	13.17	7.51	10.41	2.34973
chr1	201465023	201465523	intron (NM_001193570, intron 2 of 5)	intron (NM_001193570, intron 2 of 5)	428	NM_001193572	1465	Hs.108080	NM_004078	ENSG00000159176	CSRP1	CRP|CRP1|CSRP|CYRP|D1S181E|HEL-141|HEL-S-286	cysteine and glycine rich protein 1	protein-coding	12.66	25.08	6.81	2.53	3.02	2.38	2.43	-2.40443
chr15	68564235	68564735	Intergenic	Intergenic	-5656	NM_015322	10116	Hs.362733	NM_015322	ENSG00000169018	FEM1B	F1A-ALPHA|F1AA|FEM1-beta	fem-1 homolog B	protein-coding	16.14	49.83	9.58	3.17	2.2	4.39	4.51	-2.68994
chr1	241788137	241788637	intron (NM_014322, intron 1 of 3)	L2b|LINE|L2	10845	NM_001821	1122	Hs.654545	NM_001821	ENSG00000203668	CHML	REP2	CHM like, Rab escort protein 2	protein-coding	2.93	2.1	1.88	14.25	18.94	12.45	10.58	2.66271
chr1	89554138	89554638	Intergenic	HERVKC4-int|LTR|ERVK	-23345	NM_002053	2633	Hs.62661	NM_002053	ENSG00000117228	GBP1	-	guanylate binding protein 1	protein-coding	1.65	3.24	1.68	16.94	8.51	5.86	10.41	2.42006
chr7	36894895	36895395	non-coding (NR_038120, exon 6 of 6)	non-coding (NR_038120, exon 6 of 6)	63892	NR_031604	100302113		NR_031604	ENSG00000221325	MIR1200	MIRN1200|hsa-mir-1200	microRNA 1200	ncRNA	13.94	41.9	8.99	3.32	2.74	4.39	3.3	-2.50729
chr12	59762056	59762556	Intergenic	Intergenic	-227515	NM_001270622	9194	Hs.88156	NM_004731	ENSG00000118596	SLC16A7	MCT2	solute carrier family 16 member 7	protein-coding	0.92	1.13	1.58	24.22	7.41	5.13	7.29	2.93192
chr15	95217378	95217878	Intergenic	Intergenic	-180964	NR_077061	440311	Hs.745156	NR_077061	ENSG00000260521	LOC440311	-	glioma tumor suppressor candidate region gene 2 pseudogene	pseudo	10.27	31.23	5.83	2.69	3.02	2.56	2.26	-2.59731
chr17	14748764	14749264	Intergenic	Intergenic	-169108	NR_135638	101928475	Hs.638944	NR_135638	ENSG00000232058	LOC101928475	-	uncharacterized LOC101928475	ncRNA	14.67	22.16	4.94	2.37	1.65	3.11	2.78	-2.39181
chr13	20979764	20980264	intron (NM_015974, intron 6 of 7)	intron (NM_015974, intron 6 of 7)	27971	NR_039721	100616304		NR_039721	ENSG00000263978	MIR4499	-	microRNA 4499	ncRNA	12.11	24.59	6.42	2.69	3.29	3.11	1.04	-2.41867
chr1	48275409	48275909	intron (NM_001194986, intron 2 of 6)	L2a|LINE|L2	186903	NM_001194986	388630	Hs.61504	NM_001194986	ENSG00000269113	TRABD2B	TIKI2	TraB domain containing 2B	protein-coding	0.92	3.24	0.89	20.1	12.08	13	19.43	3.7592
chr19	40449813	40450313	Intergenic	MER84-int|LTR|ERV1	-9530	NM_003890	8857	Hs.111732	NM_003890	ENSG00000275395	FCGBP	FC(GAMMA)BP	Fc fragment of IgG binding protein	protein-coding	2.57	2.27	1.19	13.77	8.78	10.44	18.39	2.53701
chr13	70884805	70885305	Intergenic	Intergenic	-202430	NM_001286725	57626	Hs.508201	NM_020866	ENSG00000150361	KLHL1	MRP2	kelch like family member 1	protein-coding	1.28	1.46	1.58	11.08	7.41	6.59	4.68	2.50689
chr5	106810563	106811063	intron (NM_001962, intron 1 of 4)	intron (NM_001962, intron 1 of 4)	195783	NM_001962	1946	Hs.288741	NM_001962	ENSG00000184349	EFNA5	AF1|EFL5|EPLG7|GLC1M|LERK7|RAGS	ephrin A5	protein-coding	2.02	6.63	3.36	23.58	11.8	15.56	27.24	2.48371
chr6	109639473	109639973	Intergenic	Intergenic	24217	NR_028595	221262	Hs.373914	NR_028595	ENSG00000203799	CCDC162P	C6orf184|C6orf185|CCDC162|bA425D10.3|bA425D10.7	coiled-coil domain containing 162, pseudogene	pseudo	1.65	4.37	2.27	10.6	14	12.63	16.83	2.42411
chr5	108791357	108791857	Intergenic	Intergenic	-45932	NM_014819	9867	Hs.483036	NM_014819	ENSG00000198961	PJA2	Neurodap1|RNF131	praja ring finger ubiquitin ligase 2	protein-coding	17.79	53.55	9.98	6.33	2.74	2.01	7.81	-2.36343
chr3	137707817	137708317	Intergenic	Intergenic	-9591	NM_001002026	51208	Hs.655324	NM_016369	ENSG00000066405	CLDN18	SFTA5|SFTPJ	claudin 18	protein-coding	2.57	2.27	6.02	33.56	26.62	32.23	37.65	3.06023
chr1	108115474	108115974	3' UTR (NM_001079874, exon 10 of 10)	3' UTR (NM_001079874, exon 10 of 10)	115402	NM_001079874	10451	Hs.267659	NM_006113	ENSG00000134215	VAV3	-	vav guanine nucleotide exchange factor 3	protein-coding	22.2	18.77	6.32	0.63	3.84	1.46	3.64	-2.68509
chr7	33298150	33298650	intron (NM_001033604, intron 6 of 21)	intron (NM_001033604, intron 6 of 21)	129248	NM_014451	27241	Hs.372360	NM_014451	ENSG00000122507	BBS9	B1|C18|D1|PTHB1	Bardet-Biedl syndrome 9	protein-coding	1.1	0.32	1.28	16.3	6.86	3.11	9.2	3.24653
chr3	181568751	181569251	Intergenic	Intergenic	-101151	NR_104146	100996490	Hs.606987	NR_104146	ENSG00000242512	LINC01206	-	long intergenic non-protein coding RNA 1206	ncRNA	0.18	0.49	1.28	12.03	10.7	7.32	6.59	3.84896
chr2	8633368	8633868	Intergenic	UCON8|Unknown|Unknown	90304	NR_110257	101929567	Hs.634706	NR_110257	ENSG00000236008	LINC01814	-	long intergenic non-protein coding RNA 1814	ncRNA	3.3	4.53	1.28	11.71	17.29	15.01	10.93	2.78604
chr3	27626857	27627357	Intergenic	Intergenic	-101196	NM_001321103	9497	Hs.250072	NM_003615	ENSG00000033867	SLC4A7	NBC2|NBC3|NBCN1|SBC2|SLC4A6	solute carrier family 4 member 7	protein-coding	12.11	21.68	7.8	2.53	2.2	2.56	1.73	-2.69761
chr2	172410287	172410787	intron (NM_024843, intron 3 of 3)	MER51A|LTR|ERV1	31671	NM_001127383	79901	Hs.221941	NM_024843	ENSG00000071967	CYBRD1	CYB561A2|DCYTB|FRRS3	cytochrome b reductase 1	protein-coding	0.92	1.94	1.58	5.54	15.09	10.62	10.06	2.8486
chr4	103994408	103994908	intron (NM_001300754, intron 1 of 10)	intron (NM_001300754, intron 1 of 10)	3272	NM_178833	133308	Hs.546482	NM_178833	ENSG00000164038	SLC9B2	NHA2|NHE10|NHEDC2	solute carrier family 9 member B2	protein-coding	1.28	0.65	1.38	12.98	12.9	9.52	15.09	3.43264
chr14	42898219	42898719	Intergenic	LTR77|LTR|ERV1	822410	NM_152447	145581	Hs.136893	NM_152447	ENSG00000165379	LRFN5	C14orf146|FIGLER8|SALM5	leucine rich repeat and fibronectin type III domain containing 5	protein-coding	10.82	15.21	5.73	2.06	1.37	2.01	0.87	-2.95793
chr6	105073341	105073841	Intergenic	Intergenic	233830	NM_001321084	57531	Hs.434340	NM_020771	ENSG00000085382	HACE1	SPPRS	HECT domain and ankyrin repeat containing E3 ubiquitin protein ligase 1	protein-coding	10.46	23.94	7.21	2.69	2.47	4.03	2.26	-2.51608
chr1	96514149	96514649	Intergenic	MLT2B2|LTR|ERVL	56775	NR_125991	102723661	Hs.143911	NR_125991	ENSG00000237435	LOC102723661	-	uncharacterized LOC102723661	ncRNA	17.43	22.65	5.83	2.69	3.84	2.75	1.56	-2.63658
chr13	31496627	31497127	intron (NM_032849, intron 4 of 4)	intron (NM_032849, intron 4 of 4)	9868	NR_038288	100507064	Hs.654878	NR_038287	ENSG00000224743	TEX26-AS1	LINC00447	TEX26 antisense RNA 1	ncRNA	11.74	16.34	4.84	3.01	1.1	2.01	1.73	-2.63518
chr17	30130688	30131188	Intergenic	Intergenic	55155	NM_001330176	55352	Hs.462729	NM_018405	ENSG00000172301	COPRS	C17orf79|COPR5|HSA272196|TTP1	coordinator of PRMT5 and differentiation stimulator	protein-coding	2.02	2.1	1.19	6.17	10.43	9.7	13.36	2.58219
chr11	120609095	120609802	intron (NM_001282470, intron 2 of 19)	intron (NM_001282470, intron 2 of 19)	80375	NR_133008	105369532	Hs.694510	NR_133008		LOC105369532	-	uncharacterized LOC105369532	ncRNA	11.92	27.5	9.68	5.7	2.2	5.31	5.03	-2.44118
chr12	43671338	43671838	Intergenic	MLT1K|LTR|ERVL-MaLR	274136	NM_025003	80070	Hs.287554	NM_025003	ENSG00000173157	ADAMTS20	ADAM-TS20|ADAMTS-20|GON-1	ADAM metallopeptidase with thrombospondin type 1 motif 20	protein-coding	1.83	1.13	1.68	9.97	13.17	6.96	5.38	2.57083
chr12	11168389	11168889	intron (NM_001291314, intron 2 of 6)	LTR36|LTR|ERV1	6580	NM_176888	259294	Hs.687025	NM_176888	ENSG00000212124	TAS2R19	MSTP058|T2R19|T2R23|T2R48|TAS2R23|TAS2R48	taste 2 receptor member 19	protein-coding	1.28	1.78	2.07	9.81	15.92	7.51	9.02	2.5674
chr5	9467596	9468096	intron (NM_003966, intron 1 of 22)	intron (NM_003966, intron 1 of 22)	-43599	NR_109935	101929338	Hs.675861	NR_109935	ENSG00000251370	SEMA5A-AS1	CTD-2201E9.1	SEMA5A antisense RNA 1	ncRNA	17.43	33.65	8.49	1.9	2.2	2.38	1.39	-3.70287
chr1	17624368	17624868	Intergenic	Intergenic	-10072	NM_012387	23569	Hs.522969	NM_012387	ENSG00000159339	PADI4	PAD|PAD4|PADI5|PDI4|PDI5	peptidyl arginine deiminase 4	protein-coding	8.25	21.52	4.35	2.06	1.65	1.46	2.08	-2.63709
chrX	108524634	108525134	Intergenic	Intergenic	200401	NM_001522	2986	Hs.123074	NM_001522	ENSG00000101890	GUCY2F	CYGF|GC-F|GUC2DL|GUC2F|RETGC-2|ROS-GC2	guanylate cyclase 2F, retinal	protein-coding	0.92	2.1	2.77	18.2	15.64	5.13	11.62	2.47825
chrX	12628109	12628609	intron (NM_014728, intron 3 of 16)	intron (NM_014728, intron 3 of 16)	-181115	NM_002765	5634	Hs.654581	NM_002765	ENSG00000101911	PRPS2	PRSII	phosphoribosyl pyrophosphate synthetase 2	protein-coding	11.56	23.14	3.56	3.64	1.92	1.1	1.21	-2.77068
chr18	41065481	41065981	Intergenic	HERVL18-int|LTR|ERVL	-208116	NM_020783	6860	Hs.8059	NM_020783	ENSG00000132872	SYT4	HsT1192	synaptotagmin 4	protein-coding	2.38	2.91	2.86	45.59	15.37	8.61	10.24	3.01946
chr10	27069891	27070603	intron (NM_001012750, intron 2 of 10)	HERVL40-int|LTR|ERVL	79769	NM_001012750	10006	Hs.508148	NM_005470	ENSG00000136754	ABI1	ABI-1|ABLBP4|E3B1|NAP1BP|SSH3BP|SSH3BP1	abl interactor 1	protein-coding	21.1	36.89	9.38	4.75	3.02	3.48	4.16	-3.2448
chr3	32654666	32655166	Intergenic	Intergenic	-42500	NM_001329135	51143	Hs.529495	NM_016141	ENSG00000144635	DYNC1LI1	DLC-A|DNCLI1|LIC1	dynein cytoplasmic 1 light intermediate chain 1	protein-coding	9.17	10.52	4.15	2.69	0.55	1.1	1.39	-2.61564
chr6	12332016	12332516	Intergenic	Intergenic	41737	NM_001955	1906	Hs.511899	NM_001955	ENSG00000078401	EDN1	ARCND3|ET1|HDLCQ7|PPET1|QME	endothelin 1	protein-coding	2.2	4.69	1.58	18.36	9.06	12.82	22.55	2.68441
chr2	113634769	113635269	Intergenic	Intergenic	-35529	NM_173203	27178	Hs.166371	NM_014439	ENSG00000125571	IL37	FIL1|FIL1(ZETA)|FIL1Z|IL-1F7|IL-1H|IL-1H4|IL-1RP1|IL-37|IL1F7|IL1H4|IL1RP1	interleukin 37	protein-coding	9.36	18.44	7.21	4.43	1.37	2.2	1.21	-2.42528
chr4	165674956	165675456	promoter-TSS (NR_038834)	promoter-TSS (NR_038834)	-77	NR_038834	100505989	Hs.328236	NR_038834	ENSG00000248771	LINC01207	-	long intergenic non-protein coding RNA 1207	ncRNA	1.47	1.46	3.85	21.84	16.19	13.37	16.31	2.76371
chr3	143313005	143313505	intron (NM_173653, intron 6 of 15)	MIRb|SINE|MIR	252167	NR_048544	100885796	Hs.581618	NR_048544	ENSG00000240012	SLC9A9-AS1	-	SLC9A9 antisense RNA 1	ncRNA	1.65	1.13	1.19	13.3	11.8	6.41	7.46	2.8578
chr6	94677744	94678244	Intergenic	LTR79|LTR|ERVL	261193	NR_015362	643432	Hs.509936	NR_015362		TSG1	-	tumor suppressor TSG1	ncRNA	0.73	1.94	1.58	13.93	13.72	16.3	9.02	3.12918
chr16	19819488	19819988	intron (NR_130968, intron 7 of 8)	intron (NR_130968, intron 7 of 8)	76495	NM_016235	51704	Hs.148685	NM_016235	ENSG00000167191	GPRC5B	RAIG-2|RAIG2	G protein-coupled receptor class C group 5 member B	protein-coding	2.38	3.07	1.68	18.84	9.33	9.34	18.74	2.61293
chr1	220097642	220098142	intron (NM_018713, intron 2 of 3)	intron (NM_018713, intron 2 of 3)	4101	NM_018713	55532	Hs.284450	NM_018713	ENSG00000196660	SLC30A10	HMDPC|HMNDYT1|ZNT10|ZNT8|ZRC1|ZnT-10	solute carrier family 30 member 10	protein-coding	2.02	3.07	2.67	12.03	17.84	15.56	17.18	2.66581
chr1	48485248	48485748	Intergenic	Intergenic	-22936	NM_001194986	388630	Hs.61504	NM_001194986	ENSG00000269113	TRABD2B	TIKI2	TraB domain containing 2B	protein-coding	20.36	23.14	11.16	3.17	1.1	3.48	3.12	-2.76787
chr5	17445267	17445767	intron (NR_134270, intron 1 of 2)	intron (NR_134270, intron 1 of 2)	1398	NR_134270	102723526		NR_134270	ENSG00000249662	LOC102723526	-	uncharacterized LOC102723526	ncRNA	0.37	2.59	2.86	29.12	23.6	21.06	28.11	3.83497
chr9	124398719	124399219	intron (NM_032552, intron 1 of 16)	intron (NM_032552, intron 1 of 16)	69588	NM_032552	153090	Hs.522378	NM_032552	ENSG00000136848	DAB2IP	AF9Q34|AIP-1|AIP1|DIP1/2	DAB2 interacting protein	protein-coding	15.23	52.74	11.16	3.48	4.94	3.66	4.51	-2.42994
chr9	20236591	20237091	Intergenic	Intergenic	174395	NR_039684	100616229		NR_039684	ENSG00000263790	MIR4473	-	microRNA 4473	ncRNA	5.69	24.27	5.23	2.69	1.65	1.46	3.64	-2.49169
chr3	96679727	96680227	intron (NM_001080448, intron 2 of 17)	HERV16-int|LTR|ERVL	146552	NM_001278301	285220	Hs.272208	NM_173655	ENSG00000080224	EPHA6	EHK-2|EHK2|EK12|EPA6|HEK12|PRO57066	EPH receptor A6	protein-coding	18.89	17.63	7.11	2.22	2.2	0.92	2.08	-3.12642
chr20	11497037	11497537	Intergenic	Intergenic	-243256	NR_038972	339593	Hs.434320	NR_038972		LOC339593	-	uncharacterized LOC339593	ncRNA	2.75	0.65	0.69	10.76	6.86	10.25	8.67	2.72677
chr8	128872065	128872565	intron (NR_003367, intron 1 of 8)	intron (NR_003367, intron 1 of 8)	64107	NR_031609	100302185		NR_031609	ENSG00000249859	MIR1204	hsa-mir-1204	microRNA 1204	ncRNA	17.43	60.19	11.06	2.53	2.2	5.68	1.21	-3.3327
chr6	120699699	120700199	Intergenic	Intergenic	363624	NR_036098	100422951		NR_036098	ENSG00000265725	MIR3144	mir-3144	microRNA 3144	ncRNA	2.02	0.97	0.99	10.13	10.15	6.77	7.98	2.90573
chr8	11486136	11486636	Intergenic	Intergenic	-48042	NM_001308094	2626	Hs.243987	NM_002052	ENSG00000136574	GATA4	ASD2|TACHD|TOF|VSD1	GATA binding protein 4	protein-coding	2.57	2.43	4.05	12.66	12.62	16.66	17.35	2.33215
chr8	87014879	87015379	Intergenic	MER44B|DNA|TcMar-Tigger	66797	NM_033126	85481	Hs.566854	NM_033126	ENSG00000147613	PSKH2	-	protein serine kinase H2	protein-coding	10.64	26.7	4.35	2.22	1.65	2.38	2.08	-2.81305
chr15	52018488	52018988	intron (NM_001143917, intron 1 of 2)	intron (NM_001143917, intron 1 of 2)	11582	NM_153374	256586	Hs.603629	NM_153374	ENSG00000140280	LYSMD2	-	LysM domain containing 2	protein-coding	15.41	28.8	7.21	3.48	2.74	3.3	2.95	-2.52376
chr9	10228105	10228605	intron (NM_002839, intron 3 of 45)	intron (NM_002839, intron 3 of 45)	384368	NM_002839	5789	Hs.446083	NM_002839	ENSG00000153707	PTPRD	HPTP|HPTPD|HPTPDELTA|PTPD|RPTPDELTA	protein tyrosine phosphatase, receptor type D	protein-coding	0.73	1.78	1.19	17.25	18.66	9.52	7.81	3.47751
chr12	60660024	60660766	Intergenic	Tigger3b|DNA|TcMar-Tigger	577277	NR_073056	9194	Hs.88156	NM_004731	ENSG00000118596	SLC16A7	MCT2	solute carrier family 16 member 7	protein-coding	0.73	1.46	0.89	15.51	18.66	15.93	19.43	4.02312
chr9	85747609	85748109	Intergenic	Intergenic	-69816	NM_152573	158158	Hs.129136	NM_152573	ENSG00000165105	RASEF	RAB45	RAS and EF-hand domain containing	protein-coding	1.28	0.97	1.88	10.92	3.02	4.94	12.67	2.57932
chr7	32709675	32710175	intron (NR_036680, intron 5 of 16)	intron (NR_036680, intron 5 of 16)	48855	NR_036680	100129460	Hs.633705	NR_036680		DPY19L1P1	-	DPY19L1 pseudogene 1	pseudo	0.73	1.13	1.58	4.91	4.67	8.61	8.15	2.47374
chr18	43409039	43409704	intron (NM_213602, intron 1 of 5)	intron (NM_213602, intron 1 of 5)	3827	NM_213602	284266	Hs.287692	NM_213602	ENSG00000197046	SIGLEC15	CD33L3|HsT1361|SIGLEC-15	sialic acid binding Ig like lectin 15	protein-coding	6.6	12.13	5.83	48.12	35.68	32.04	37.82	2.47629
chr16	74030730	74031230	Intergenic	Intergenic	218440	NR_104657	101928035	Hs.39557	NR_104657	ENSG00000261404	LOC101928035	-	uncharacterized LOC101928035	ncRNA	2.75	1.13	2.17	21.37	18.39	13.73	13.88	2.84033
chr6	22056633	22057133	non-coding (NR_015410, exon 8 of 12)	non-coding (NR_015410, exon 8 of 12)	90539	NR_034143	729177	Hs.730673	NR_034143	ENSG00000260455	NBAT1	CASC14|NBAT-1	neuroblastoma associated transcript 1	ncRNA	16.14	43.2	5.83	2.22	3.29	4.03	1.91	-2.7036
chr2	236617760	236618260	intron (NM_001037131, intron 2 of 17)	intron (NM_001037131, intron 2 of 17)	203615	NR_131900	100506749	Hs.684184	NR_131900	ENSG00000235529	AGAP1-IT1	-	AGAP1 intronic transcript 1	ncRNA	3.3	6.8	3.95	17.73	26.35	27.46	30.01	2.55074
chr8	59942944	59943444	intron (NM_014729, intron 1 of 8)	intron (NM_014729, intron 1 of 8)	88573	NM_014729	9760	Hs.491805	NM_014729	ENSG00000198846	TOX	TOX1	thymocyte selection associated high mobility group box	protein-coding	1.83	1.29	2.47	11.08	15.92	11.9	6.77	2.43177
chr2	76235071	76235571	Intergenic	LTR9|LTR|ERV1	-297210	NM_001201335	6936	Hs.303808	NM_003203	ENSG00000005436	GCFC2	C2orf3|DNABF|GCF|TCF9	GC-rich sequence DNA-binding factor 2	protein-coding	1.47	4.37	3.75	27.7	19.76	18.49	12.14	2.55887
chr5	7879176	7879676	intron (NR_134482, intron 4 of 13)	intron (NR_134482, intron 4 of 13)	10209	NR_134481	4552	Hs.481551	NM_002454	ENSG00000124275	MTRR	MSR|cblE	5-methyltetrahydrofolate-homocysteine methyltransferase reductase	protein-coding	2.38	0.65	1.48	10.6	14.82	6.04	10.58	2.51518
chr5	135458959	135459459	Intergenic	Intergenic	-9325	NM_001001419	4090	Hs.167700	NM_005903	ENSG00000113658	SMAD5	DWFC|JV5-1|MADH5	SMAD family member 5	protein-coding	3.3	8.41	2.77	15.2	21.13	16.3	26.72	2.38988
chr1	14627728	14628228	Intergenic	Intergenic	-297235	NM_015209	23254	Hs.368823	NM_015209	ENSG00000189337	KAZN	KAZ	kazrin, periplakin interacting protein	protein-coding	14.67	30.25	10.37	3.17	4.67	3.48	1.21	-2.48986
chr2	206640149	206640649	intron (NM_201266, intron 15 of 16)	intron (NM_201266, intron 15 of 16)	93175	NM_201264	8828	Hs.471200	NM_003872	ENSG00000118257	NRP2	NP2|NPN2|PRO2714|VEGF165R2	neuropilin 2	protein-coding	14.86	23.94	4.64	1.58	1.37	2.2	1.56	-3.06421
chr10	8832300	8832800	Intergenic	Intergenic	-107402	NR_131944	105755953	Hs.564146	NR_131944	ENSG00000234752	LOC105755953	-	uncharacterized LOC105755953	ncRNA	1.28	1.29	1.68	15.35	7.14	2.56	5.9	2.51607
chr4	45296355	45296855	Intergenic	MER58A|DNA|hAT-Charlie	-567954	NM_138335	132789	Hs.21398	NM_138335	ENSG00000163281	GNPDA2	GNP2|SB52	glucosamine-6-phosphate deaminase 2	protein-coding	1.1	0.65	2.07	27.54	5.49	7.32	13.88	3.5991
chr13	52532211	52532711	exon (NM_001243182, exon 9 of 22)	exon (NM_001243182, exon 9 of 22)	53169	NM_001330578	540	Hs.492280	NM_000053	ENSG00000123191	ATP7B	PWD|WC1|WD|WND	ATPase copper transporting beta	protein-coding	3.49	5.99	1.28	19.31	16.74	16.66	20.13	2.53313
chr3	37987563	37988063	intron (NM_001008392, intron 1 of 7)	intron (NM_001008392, intron 1 of 7)	-23082	NR_029499	407015		NR_029499	ENSG00000199075	MIR26A1	MIR26A|MIRN26A1|mir-26a-1	microRNA 26a-1	ncRNA	18.34	41.09	9.38	3.64	2.2	5.49	4.86	-2.39375
chr6	130698961	130699461	intron (NM_001258276, intron 1 of 1)	L2a|LINE|L2	11785	NM_001258276	114801	Hs.591341	NM_052913	ENSG00000164484	TMEM200A	KIAA1913|TTMA|TTMC	transmembrane protein 200A	protein-coding	2.2	4.04	3.06	13.45	32.38	18.68	7.29	2.44618
chr4	174325567	174326067	intron (NM_001329597, intron 2 of 3)	intron (NM_001329597, intron 2 of 3)	-5420	NM_007281	11341	Hs.7122	NM_007281	ENSG00000164106	SCRG1	SCRG-1	stimulator of chondrogenesis 1	protein-coding	1.47	0.81	0.69	7.44	11.53	6.23	4.86	2.8843
chr2	193989528	193990028	Intergenic	MLT1A0|LTR|ERVL-MaLR	375207	NR_002769	64002	Hs.546994	NR_002769	ENSG00000227418	PCGEM1	LINC00071|NCRNA00071|PCAT9	PCGEM1, prostate-specific transcript (non-protein coding)	ncRNA	1.1	1.62	2.07	13.3	10.43	10.07	9.72	2.88785
chr1	179899974	179900474	Intergenic	Intergenic	-23684	NM_014810	9857	Hs.413045	NM_014810	ENSG00000135837	CEP350	CAP350|GM133	centrosomal protein 350	protein-coding	0.73	1.62	1.19	6.81	5.76	6.41	8.67	2.35873
chr5	39448073	39448573	Intergenic	Intergenic	-22988	NM_001244871	1601	Hs.696631	NM_001343	ENSG00000153071	DAB2	DOC-2|DOC2	DAB2, clathrin adaptor protein	protein-coding	2.2	1.94	1.78	16.62	7.14	11.9	12.14	2.48781
chr5	156120115	156120615	intron (NM_001128209, intron 6 of 7)	MIRc|SINE|MIR	-157184	NR_038443	153743	Hs.567727	NM_206858	ENSG00000231989	PPP1R2P3	-	protein phosphatase 1 regulatory inhibitor subunit 2 pseudogene 3	pseudo	1.1	0.65	1.48	8.71	7.14	5.68	7.63	2.38203
chr18	68095683	68096183	Intergenic	MIR|SINE|MIR	-44106	NR_110764	101060542	Hs.586967	NR_110764	ENSG00000266278	LINC01910	-	long intergenic non-protein coding RNA 1910	ncRNA	1.1	0.65	2.57	16.14	13.72	7.14	14.92	3.22544
chr7	77022535	77023035	intron (NM_017439, intron 5 of 30)	L2a|LINE|L2	-21730	NR_110073	101927243	Hs.547753	NR_110073		LOC101927243	-	uncharacterized LOC101927243	ncRNA	15.04	20.39	5.23	3.01	1.65	2.38	3.3	-2.41697
chr4	48605349	48605849	intron (NM_015030, intron 11 of 63)	intron (NM_015030, intron 11 of 63)	113330	NM_175619	326340	Hs.276457	NM_175619	ENSG00000182223	ZAR1	Z3CXXC6	zygote arrest 1	protein-coding	0.73	1.29	1.58	10.92	7.14	5.31	8.15	2.88162
chr11	20586305	20586805	Intergenic	Intergenic	-34391	NM_001318369	9152	Hs.136557	NM_004211	ENSG00000165970	SLC6A5	GLYT-2|GLYT2|HKPX3|NET1	solute carrier family 6 member 5	protein-coding	1.1	0.81	2.07	13.61	18.94	8.24	8.5	3.08461
chr12	68104297	68104797	intron (NR_110063, intron 4 of 4)	intron (NR_110063, intron 4 of 4)	18708	NR_110063	101927901	Hs.369609	NR_110063	ENSG00000255970	LOC101927901	-	uncharacterized LOC101927901	ncRNA	3.49	4.37	2.86	13.61	19.49	14.83	17.35	2.63459
chr6	123439913	123440413	Intergenic	Tigger3b|DNA|TcMar-Tigger	123047	NM_001010852	134829	Hs.486361	NM_001010852	ENSG00000146352	CLVS2	C6orf212|C6orf213|RLBP1L2|bA160A10.4	clavesin 2	protein-coding	2.75	1.29	2.57	27.38	15.64	18.13	20.82	3.01731
chr4	182457877	182458573	Intergenic	Intergenic	-377923	NR_033918	728081	Hs.535735	NR_033918	ENSG00000248197	LINC00290	NCRNA00290	long intergenic non-protein coding RNA 290	ncRNA	1.1	1.29	2.57	19.31	38.7	18.13	2.08	3.20317
chr8	95210672	95211172	intron (NM_001144663, intron 1 of 17)	intron (NM_001144663, intron 1 of 17)	9893	NM_004063	1015	Hs.591853	NM_004063	ENSG00000079112	CDH17	CDH16|HPT-1|HPT1	cadherin 17	protein-coding	0.55	1.29	1.98	9.66	6.31	9.7	7.63	3.08017
chr8	42358537	42359037	5' UTR (NM_001257180, exon 1 of 11)	5' UTR (NM_001257180, exon 1 of 11)	191	NM_001257180	6575	Hs.653173	NM_006749	ENSG00000168575	SLC20A2	GLVR-2|GLVR2|IBGC1|IBGC3|MLVAR|PIT-2|PIT2|RAM1|Ram-1	solute carrier family 20 member 2	protein-coding	9.54	17.63	6.81	1.58	2.47	2.75	2.95	-2.37196
chr11	15640119	15640619	Intergenic	Intergenic	-25062	NM_001293172	102724957	Hs.512245	NM_001293172	ENSG00000254695	LOC102724957	-	uncharacterized LOC102724957	protein-coding	1.28	2.1	1.58	23.43	15.92	10.25	19.26	3.42805
chr7	16886887	16887387	Intergenic	Intergenic	34476	NM_176813	155465	Hs.100686	NM_176813	ENSG00000173467	AGR3	AG-3|AG3|BCMP11|HAG3|PDIA18|hAG-3	anterior gradient 3, protein disulphide isomerase family member	protein-coding	3.49	5.02	2.37	20.42	19.21	12.45	22.9	2.35125
chr19	20343904	20344404	Intergenic	MER92B|LTR|ERV1	66131	NM_052852	90649	Hs.590991	NM_052852	ENSG00000256229	ZNF486	KRBO2	zinc finger protein 486	protein-coding	1.47	0.65	1.09	14.88	10.15	5.13	5.73	3.05155
chr8	128582523	128583023	Intergenic	Intergenic	-88389	NR_024393	727677	Hs.673248	NR_024393	ENSG00000246228	CASC8	CARLo-1|LINC00860	cancer susceptibility candidate 8 (non-protein coding)	ncRNA	2.93	3.56	2.57	14.88	18.66	12.45	11.45	2.40642
chr9	1558571	1559071	Intergenic	L1PA4|LINE|L1	-456398	NM_001289397	6595	Hs.298990	NM_003070	ENSG00000080503	SMARCA2	BAF190|BRM|NCBRS|SNF2|SNF2L2|SNF2LA|SWI2|Sth1p|hBRM|hSNF2a	SWI/SNF related, matrix associated, actin dependent regulator of chromatin, subfamily a, member 2	protein-coding	10.82	11.33	4.74	3.96	2.2	0.55	1.56	-2.4216
chr2	88444314	88445033	Intergenic	Intergenic	-17024	NM_001443	2168	Hs.380135	NM_001443	ENSG00000163586	FABP1	FABPL|L-FABP	fatty acid binding protein 1	protein-coding	3.49	2.59	2.07	10.13	20.58	14.83	10.58	2.77735
chr15	60912817	60913317	intron (NM_002943, intron 1 of 10)	intron (NM_002943, intron 1 of 10)	6662	NM_002943	6095	Hs.560343	NM_002943	ENSG00000069667	RORA	NR1F1|ROR1|ROR2|ROR3|RZR-ALPHA|RZRA	RAR related orphan receptor A	protein-coding	10.64	34.14	4.94	3.32	2.74	2.2	3.64	-2.38289
chr1	159940755	159941255	intron (NR_038849, intron 1 of 2)	MER77B|LTR|ERVL	9991	NR_038849	100505633	Hs.445045	NR_038849	ENSG00000224259	LINC01133	-	long intergenic non-protein coding RNA 1133	ncRNA	3.3	3.07	2.96	9.5	24.7	13.73	9.72	2.44696
chr12	105666598	105667098	Intergenic	MLT1K|LTR|ERVL-MaLR	-36840	NM_001251904	55198	Hs.506603	NM_018171	ENSG00000136044	APPL2	DIP13B	adaptor protein, phosphotyrosine interacting with PH domain and leucine zipper 2	protein-coding	11.74	15.37	2.96	0.32	3.02	2.01	0.52	-2.7235
chr10	80778280	80778780	intron (NR_015429, intron 3 of 7)	intron (NR_015429, intron 3 of 7)	48675	NR_024429	283050	Hs.309176	NR_015429	ENSG00000224596	ZMIZ1-AS1	-	ZMIZ1 antisense RNA 1	ncRNA	11.01	25.24	6.22	3.32	2.2	2.01	3.12	-2.32923
chr4	144146368	144146868	Intergenic	Intergenic	40548	NM_032557	84640	Hs.480848	NM_032557	ENSG00000170185	USP38	HP43.8KD	ubiquitin specific peptidase 38	protein-coding	1.47	0.81	2.47	12.82	23.88	8.79	9.02	2.68445
chr4	175525307	175525807	Intergenic	Intergenic	-81508	NM_000860	3248	Hs.596913	NM_000860	ENSG00000164120	HPGD	15-PGDH|PGDH|PGDH1|PHOAR1|SDR36C1	hydroxyprostaglandin dehydrogenase 15-(NAD)	protein-coding	1.65	1.62	1.19	14.56	5.49	6.77	11.1	2.71166
chr4	78097741	78098241	Intergenic	Intergenic	19634	NM_004354	901	Hs.740456	NM_004354	ENSG00000138764	CCNG2	-	cyclin G2	protein-coding	9.72	29.12	8.69	1.42	2.47	2.93	2.95	-2.72752
chr2	219176891	219177391	intron (NM_015488, intron 2 of 9)	MLT1L|LTR|ERVL-MaLR	-10761	NM_022572	25953	Hs.98475	NM_015488	ENSG00000127838	PNKD	BRP17|DYT8|FKSG19|FPD1|KIPP1184|MR-1|MR1|PDC|PKND1|TAHCCP2	paroxysmal nonkinesigenic dyskinesia	protein-coding	2.57	1.46	2.47	35.77	18.11	15.01	23.42	3.63291
chr12	27833559	27834059	intron (NM_001198916, intron 19 of 27)	intron (NM_001198916, intron 19 of 27)	-15619	NM_001029874	387849	Hs.269836	NM_001029874	ENSG00000174236	REP15	RAB15EP	RAB15 effector protein	protein-coding	1.65	1.62	0.4	13.93	10.43	16.11	20.65	3.80146
chr2	165567752	165568252	intron (NM_001278461, intron 6 of 12)	intron (NM_001278461, intron 6 of 12)	-23715	NR_033309	100337591	Hs.664357	NR_033309	ENSG00000206869	SNORA70F	U70F	small nucleolar RNA, H/ACA box 70F	snoRNA	1.28	0.97	0.49	13.3	16.74	10.8	15.61	3.73169
chr10	71097340	71097840	intron (NM_001322367, intron 1 of 16)	intron (NM_001322367, intron 1 of 16)	18987	NM_000188	3098	Hs.370365	NM_000188	ENSG00000156515	HK1	HK|HK1-ta|HK1-tb|HK1-tc|HKD|HKI|HMSNR|HXK1|hexokinase	hexokinase 1	protein-coding	21.1	35.59	6.42	5.07	2.74	3.3	3.12	-2.82855
chr11	23034434	23034934	Intergenic	Tigger1a_Art|DNA|TcMar-Tigger	-152712	NM_001195637	100500938	Hs.555029	NM_001195637	ENSG00000255359	CCDC179	-	coiled-coil domain containing 179	protein-coding	0.55	0.49	0.99	12.66	9.88	7.32	7.63	3.69128
chr12	112629548	112630048	intron (NM_001109662, intron 59 of 75)	intron (NM_001109662, intron 59 of 75)	-28673	NR_106921	102465519		NR_106921	ENSG00000173064	MIR6861	hsa-mir-6861	microRNA 6861	ncRNA	14.31	20.39	5.73	1.9	1.65	3.85	1.39	-2.87119
chr2	35523556	35524056	Intergenic	Intergenic	-172665	NR_039629	100616475		NR_039629	ENSG00000265301	MIR548AD	-	microRNA 548ad	ncRNA	9.36	20.22	5.23	2.06	1.92	2.01	2.08	-2.76692
chr5	148329558	148330058	Intergenic	Intergenic	112929	NM_024577	79628	Hs.483784	NM_024577	ENSG00000169247	SH3TC2	CMT4C|MNMN	SH3 domain and tetratricopeptide repeats 2	protein-coding	14.67	22.97	5.83	2.06	5.21	1.46	2.43	-2.41412
chr3	159903463	159903963	intron (NR_108088, intron 3 of 9)	intron (NR_108088, intron 3 of 9)	21166	NR_108088	101928376	Hs.565865	NR_108088	ENSG00000244040	IL12A-AS1	-	IL12A antisense RNA 1	ncRNA	2.57	3.07	2.47	32.76	25.8	19.04	26.2	3.31114
chr4	114823041	114823541	3' UTR (NM_024590, exon 2 of 2)	3' UTR (NM_024590, exon 2 of 2)	77587	NM_024590	79642	Hs.22895	NM_024590	ENSG00000180801	ARSJ	-	arylsulfatase family member J	protein-coding	2.57	1.94	3.06	22.95	18.11	6.04	13.88	2.48018
chr13	71430796	71431296	Intergenic	Intergenic	-158227	NR_047699	100885781	Hs.372660	NR_047699	ENSG00000226846	LINC00348	-	long intergenic non-protein coding RNA 348	ncRNA	0.73	2.27	2.37	18.2	27.44	13.73	14.05	3.2297
chr2	169349683	169350183	intron (NM_203463, intron 1 of 9)	MIR|SINE|MIR	37174	NM_001256126	253782	Hs.506829	NM_203463	ENSG00000172292	CERS6	CERS5|LASS6	ceramide synthase 6	protein-coding	1.28	1.29	1.28	12.35	7.41	7.69	7.81	2.71991
chr11	94335794	94336294	intron (NM_152431, intron 12 of 19)	intron (NM_152431, intron 12 of 19)	35570	NM_152431	143689	Hs.660188	NM_152431	ENSG00000134627	PIWIL4	HIWI2|MIWI2	piwi like RNA-mediated gene silencing 4	protein-coding	2.38	2.1	0.99	10.13	19.49	13.18	11.62	2.77685
chr15	47958248	47958748	intron (NM_001198999, intron 4 of 19)	intron (NM_001198999, intron 4 of 19)	-52188	NM_153619	80031	Hs.511265	NM_020858	ENSG00000137872	SEMA6D	-	semaphorin 6D	protein-coding	11.56	9.06	3.16	1.58	2.74	2.56	0.35	-2.48853
chr2	29946105	29946605	intron (NM_004304, intron 1 of 28)	L2a|LINE|L2	198122	NM_004304	238	Hs.654469	NM_004304	ENSG00000171094	ALK	CD246|NBLST3	anaplastic lymphoma receptor tyrosine kinase	protein-coding	2.75	2.27	3.16	13.61	13.45	15.01	25.5	2.46995
chr6	79520434	79520934	Intergenic	MLT1H|LTR|ERVL-MaLR	-56577	NM_001010844	134728	Hs.656212	NM_001010844	ENSG00000146243	IRAK1BP1	AIP70|SIMPL	interleukin 1 receptor associated kinase 1 binding protein 1	protein-coding	11.56	10.52	7.9	2.85	1.37	2.56	2.95	-2.38392
chr1	220091093	220091593	intron (NM_018713, intron 3 of 3)	AluSx|SINE|Alu	10650	NM_018713	55532	Hs.284450	NM_018713	ENSG00000196660	SLC30A10	HMDPC|HMNDYT1|ZNT10|ZNT8|ZRC1|ZnT-10	solute carrier family 30 member 10	protein-coding	2.57	1.29	2.77	8.55	6.86	10.62	16.66	2.4003
chr6	30778524	30779099	Intergenic	MER74A|LTR|ERVL	19624	NR_130726	401247		NR_130726	ENSG00000214894	LINC00243	C6orf214|NCRNA00243	long intergenic non-protein coding RNA 243	ncRNA	25.31	49.83	5.93	3.96	5.49	2.2	3.3	-3.6631
chr17	63103510	63104010	intron (NR_110801, intron 2 of 2)	MSTD|LTR|ERVL-MaLR	6830	NR_110801	100507002	Hs.729924	NR_110801		LOC100507002	-	uncharacterized LOC100507002	ncRNA	10.46	10.35	5.73	0.79	1.1	1.1	1.39	-2.89766
chr1	67604750	67605250	Intergenic	MIR|SINE|MIR	-4346	NR_075077	400757	Hs.666621	NM_001013674	ENSG00000203963	C1orf141	-	chromosome 1 open reading frame 141	protein-coding	1.28	0.32	1.58	15.83	14.82	13	17.18	3.93995
chr1	162148854	162149354	intron (NM_014697, intron 2 of 9)	MIR|SINE|MIR	22207	NR_039798	100616386		NR_039798	ENSG00000266144	MIR4654	mir-4654	microRNA 4654	ncRNA	0.55	2.91	1.58	10.76	6.59	10.99	10.58	3.09059
chr1	220295455	220295955	intron (NM_018060, intron 12 of 22)	intron (NM_018060, intron 12 of 22)	-4122	NR_029711	406969		NR_029711	ENSG00000207624	MIR194-1	MIRN194-1|mir-194-1	microRNA 194-1	ncRNA	1.65	0.16	1.48	12.66	13.45	6.41	5.9	2.66379
chr7	123438095	123438595	Intergenic	Intergenic	-7580	NR_125730	103625684		NR_125730	ENSG00000207357	RNU6-2	U6-2	RNA, U6 small nuclear 2	snRNA	2.57	5.99	1.68	21.68	15.37	11.35	23.25	2.80884
chr6	105820154	105821085	intron (NM_002726, intron 5 of 14)	intron (NM_002726, intron 5 of 14)	30379	NM_002726	5550	Hs.436564	NM_002726	ENSG00000085377	PREP	PE|PEP	prolyl endopeptidase	protein-coding	15.23	13.43	6.32	26.43	35.4	27.65	25.5	3.4092
chr5	97840109	97840609	Intergenic	Intergenic	-264640	NM_001012761	285704	Hs.526902	NM_173670	ENSG00000174136	RGMB	DRAGON	repulsive guidance molecule family member b	protein-coding	1.1	1.29	1.78	15.51	10.43	4.03	6.77	2.42484
chr8	116750819	116751319	Intergenic	L2c|LINE|L2	-69814	NM_001330599	7227	Hs.657018	NM_014112	ENSG00000104447	TRPS1	GC79|LGCR	transcriptional repressor GATA binding 1	protein-coding	16.51	34.14	7.7	2.53	3.29	2.93	2.95	-2.58981
chr6	8158018	8158518	Intergenic	LTR49|LTR|ERV1	-55440	NM_004280	9521	Hs.602353	NM_004280	ENSG00000124802	EEF1E1	AIMP3|P18	eukaryotic translation elongation factor 1 epsilon 1	protein-coding	1.47	0	1.09	23.43	20.03	18.68	14.92	4.25239
chr9	14652717	14653217	intron (NM_178566, intron 7 of 9)	intron (NM_178566, intron 7 of 9)	40513	NM_178566	340481	Hs.649522	NM_178566	ENSG00000175893	ZDHHC21	9130404H11Rik|DHHC-21|DHHC21|DNZ1|HSPC097	zinc finger DHHC-type containing 21	protein-coding	1.1	1.46	1.09	5.7	4.94	6.96	6.42	2.48738
chr16	87823549	87824049	Intergenic	Intergenic	-11045	NR_120309	102724467	Hs.587857	NR_120309		LOC102724467	-	uncharacterized LOC102724467	ncRNA	17.79	44.01	7.7	3.01	2.74	2.38	3.47	-2.86751
chr3	133473241	133473741	exon (NM_001063, exon 4 of 17)	exon (NM_001063, exon 4 of 17)	8514	NM_001063	7018	Hs.518267	NM_001063	ENSG00000091513	TF	HEL-S-71p|PRO1557|PRO2086|TFQTL1	transferrin	protein-coding	20.18	44.98	11.36	4.59	4.39	2.38	4.68	-2.77202
chr7	92573809	92574309	Intergenic	Intergenic	-108118	NM_001145306	1021	Hs.119882	NM_001259	ENSG00000105810	CDK6	MCPH12|PLSTIRE	cyclin dependent kinase 6	protein-coding	5.32	18.28	4.44	1.9	1.37	3.48	0.52	-2.48431
chr4	96152893	96153393	intron (NM_003728, intron 7 of 15)	intron (NM_003728, intron 7 of 15)	140501	NM_001256794	658	Hs.598475	NM_001203	ENSG00000138696	BMPR1B	ALK-6|ALK6|AMDD|BDA1D|BDA2|CDw293	bone morphogenetic protein receptor type 1B	protein-coding	0.73	2.27	0.79	6.49	7.41	8.61	5.55	2.62526
chr9	79200974	79201474	Intergenic	L1ME3|LINE|L1	85675	NM_001097636	2650	Hs.521568	NM_001490	ENSG00000187210	GCNT1	C2GNT|C2GNT-L|C2GNT1|G6NT|NACGT2|NAGCT2	glucosaminyl (N-acetyl) transferase 1, core 2	protein-coding	1.65	0.49	1.58	13.14	11.25	12.08	10.58	2.96425
chr7	83176848	83177348	intron (NM_012431, intron 1 of 16)	intron (NM_012431, intron 1 of 16)	93649	NM_001178129	9723	Hs.528721	NM_012431	ENSG00000170381	SEMA3E	M-SEMAH|M-SemaK|SEMAH|coll-5	semaphorin 3E	protein-coding	4.04	4.21	2.77	30.39	19.49	12.63	13.88	2.3868
chr15	55533335	55533835	intron (NM_183234, intron 1 of 6)	intron (NM_183234, intron 1 of 6)	28899	NM_183234	5873	Hs.626665	NM_004580	ENSG00000069974	RAB27A	GS2|HsT18676|RAB27|RAM	RAB27A, member RAS oncogene family	protein-coding	1.1	0.32	0.99	8.23	4.39	4.94	6.59	2.48661
chr4	173959603	173960103	intron (NM_001034845, intron 12 of 12)	intron (NM_001034845, intron 12 of 12)	-130051	NM_017423	51809	Hs.548088	NM_017423	ENSG00000109586	GALNT7	GALNAC-T7|GalNAcT7	polypeptide N-acetylgalactosaminyltransferase 7	protein-coding	1.28	3.07	2.67	16.62	12.9	9.34	14.05	2.68418
chr13	106500811	106501311	Intergenic	Intergenic	141882	NR_046391	144920	Hs.567700	NR_046391		LINC00343	LINC00344|NCRNA00343|NCRNA00344	long intergenic non-protein coding RNA 343	ncRNA	9.54	19.58	4.54	0.95	2.2	1.28	1.21	-3.10119
chr2	49227911	49228411	intron (NM_000145, intron 4 of 9)	MIRc|SINE|MIR	-58581	NR_107011	102465854		NR_107011	ENSG00000212036	MIR548BA	hsa-mir-548ba	microRNA 548ba	ncRNA	0.73	1.46	1.88	22	10.15	5.31	15.09	3.50149
chr13	77370080	77370580	Intergenic	Intergenic	90210	NM_138444	115207	Hs.644125	NM_138444	ENSG00000178695	KCTD12	C13orf2|PFET1|PFETIN	potassium channel tetramerization domain containing 12	protein-coding	1.83	1.94	1.09	11.4	6.59	8.42	9.2	2.80305
chr4	153179810	153180570	Intergenic	Intergenic	-78617	NR_104273	102191832	Hs.712524	NR_104273	ENSG00000270751	FBXW7-AS1	DEAR|DEspR	FBXW7 antisense RNA 1	pseudo	18.71	24.59	9.58	4.91	6.04	4.94	5.9	-2.35174
chr4	119181374	119181874	Intergenic	MLT2B1|LTR|ERVL	-18293	NR_003584	100093630	Hs.535762	NR_003584	ENSG00000269893	SNHG8	LINC00060|NCRNA00060	small nucleolar RNA host gene 8	ncRNA	1.83	1.94	0.89	13.3	10.15	5.86	5.38	2.568
chr18	3305257	3305757	Intergenic	Tigger3c|DNA|TcMar-Tigger	42790	NM_001144945	103910	Hs.190086	NM_033546	ENSG00000118680	MYL12B	MLC-B|MRLC2	myosin light chain 12B	protein-coding	9.91	34.3	6.32	2.69	2.2	1.65	4.51	-2.54623
chr6	15133037	15133537	Intergenic	Intergenic	-112919	NM_004973	3720	Hs.269059	NM_004973	ENSG00000008083	JARID2	JMJ	jumonji and AT-rich interaction domain containing 2	protein-coding	11.37	24.43	5.53	2.69	1.65	3.48	2.95	-2.49249
chr2	159749557	159750057	Intergenic	Intergenic	-75339	NM_001145909	85461	Hs.61590	NM_033394	ENSG00000115183	TANC1	ROLSB|TANC	tetratricopeptide repeat, ankyrin repeat and coiled-coil containing 1	protein-coding	14.12	24.43	7.51	2.53	2.2	1.65	4.16	-2.46245
chr11	27410493	27410993	intron (NM_018490, intron 4 of 17)	intron (NM_018490, intron 4 of 17)	-25948	NM_080654	91057	Hs.143733	NM_030771	ENSG00000109881	CCDC34	L15|NY-REN-41|RAMA3	coiled-coil domain containing 34	protein-coding	3.12	0.65	0.89	8.86	12.08	11.54	7.63	2.3769
chr2	196409105	196409605	Intergenic	L2c|LINE|L2	-112177	NM_001127257	57181	Hs.650158	NM_020342	ENSG00000196950	SLC39A10	LZT-Hs2	solute carrier family 39 member 10	protein-coding	1.1	0.81	1.38	16.46	16.47	14.65	16.14	3.58024
chr2	177861797	177862297	Intergenic	Intergenic	-215375	NM_001330247	220988	Hs.516539	NM_194247	ENSG00000170144	HNRNPA3	2610510D13Rik|D10S102|FBRNP|HNRPA3	heterogeneous nuclear ribonucleoprotein A3	protein-coding	1.65	1.62	3.36	17.73	9.88	13	17.7	2.49906
chr9	74577149	74577649	intron (NM_182505, intron 2 of 3)	intron (NM_182505, intron 2 of 3)	50976	NM_182505	138241	Hs.534190	NM_182505	ENSG00000155621	C9orf85	-	chromosome 9 open reading frame 85	protein-coding	1.1	1.78	0.89	15.35	16.47	8.79	11.1	3.48613
chr8	138615292	138615792	Intergenic	L2b|LINE|L2	-189711	NR_125428	101927915	Hs.695851	NR_125428		LOC101927915	-	uncharacterized LOC101927915	ncRNA	6.97	11	4.94	2.53	1.1	1.83	1.21	-2.34592
chr2	219095545	219096045	intron (NM_005731, intron 3 of 9)	intron (NM_005731, intron 3 of 9)	13675	NM_005731	10109	Hs.529303	NM_005731	ENSG00000163466	ARPC2	ARC34|PNAS-139|PRO2446|p34-Arc	actin related protein 2/3 complex subunit 2	protein-coding	3.49	2.27	2.67	17.41	17.29	13.92	14.4	2.51318
chr4	90819353	90819853	intron (NM_007351, intron 1 of 7)	intron (NM_007351, intron 1 of 7)	3551	NM_007351	22915	Hs.268107	NM_007351	ENSG00000138722	MMRN1	ECM|EMILIN4|GPIa*|MMRN	multimerin 1	protein-coding	2.02	1.46	3.06	29.6	18.39	12.82	15.61	3.0218
chr7	16649371	16649871	intron (NM_020319, intron 6 of 9)	intron (NM_020319, intron 6 of 9)	35821	NM_020319	57037	Hs.157378	NM_020319	ENSG00000106524	ANKMY2	ZMYND20	ankyrin repeat and MYND domain containing 2	protein-coding	1.47	0.97	1.68	15.51	12.62	7.69	10.06	3.05517
chr14	57322450	57322950	intron (NR_029385, intron 1 of 3)	intron (NR_029385, intron 1 of 3)	42799	NR_029385	100309464	Hs.637962	NR_029385	ENSG00000248550	OTX2-AS1	OTX2OS1	OTX2 antisense RNA 1 (head to head)	ncRNA	1.83	1.29	2.17	11.08	10.7	6.04	6.77	2.4695
chr18	20406629	20407129	Intergenic	Intergenic	-40079	NR_110782	101927571	Hs.335020	NR_110782	ENSG00000266850	LOC101927571	-	uncharacterized LOC101927571	ncRNA	12.29	21.68	3.36	1.27	0.27	0.92	1.04	-4.44216
chr5	97250755	97251255	Intergenic	MIR|SINE|MIR	410605	NR_105028	102546227	Hs.582516	NR_105028	ENSG00000250331	LINC01340	-	long intergenic non-protein coding RNA 1340	ncRNA	1.1	1.62	1.68	11.24	12.08	7.32	2.78	2.33745
chr5	75771754	75772254	intron (NM_006633, intron 2 of 35)	intron (NM_006633, intron 2 of 35)	-71230	NM_001285460	10788	Hs.291030	NM_006633	ENSG00000145703	IQGAP2	-	IQ motif containing GTPase activating protein 2	protein-coding	2.57	2.91	2.77	16.94	11.25	13.18	12.32	2.44164
chr21	44930488	44930988	Intergenic	Intergenic	-31324	NR_136540	102724354	Hs.592161	NR_136540	ENSG00000280191	LINC01669	-	long intergenic non-protein coding RNA 1669	ncRNA	15.04	37.21	8	3.01	3.57	3.11	5.73	-2.35592
chr18	51773413	51773913	Intergenic	Intergenic	-22186	NM_007195	11201	Hs.438533	NM_007195	ENSG00000101751	POLI	RAD30B|RAD3OB	DNA polymerase iota	protein-coding	19.44	20.06	6.91	2.85	2.74	2.56	2.78	-2.50324
chr7	117130007	117130507	intron (NM_000492, intron 1 of 26)	MIRb|SINE|MIR	10240	NM_000492	1080	Hs.489786	NM_000492	ENSG00000001626	CFTR	ABC35|ABCC7|CF|CFTR/MRP|MRP7|TNR-CFTR|dJ760C5.1	cystic fibrosis transmembrane conductance regulator	protein-coding	1.47	2.27	0.89	11.24	14	10.25	7.98	3.19171
chr6	86099775	86100275	promoter-TSS (NR_134634)	promoter-TSS (NR_134634)	-121	NR_134634	101928820	Hs.587370	NR_134633	ENSG00000234155	LOC101928820	-	uncharacterized LOC101928820	ncRNA	1.28	1.94	2.47	9.66	23.88	9.52	8.67	2.58697
chr11	27076592	27077092	intron (NR_125768, intron 3 of 3)	intron (NR_125768, intron 3 of 3)	14333	NM_003986	8424	Hs.591996	NM_003986	ENSG00000129151	BBOX1	BBH|BBOX|G-BBH|gamma-BBH	gamma-butyrobetaine hydroxylase 1	protein-coding	1.28	0.65	2.07	15.67	14.82	12.08	10.76	3.36226
chr1	86037462	86037962	intron (NM_001134445, intron 1 of 6)	intron (NM_001134445, intron 1 of 6)	6334	NM_001134445	23576	Hs.713411	NM_012137	ENSG00000153904	DDAH1	DDAH|DDAH-1|DDAHI|HEL-S-16	dimethylarginine dimethylaminohydrolase 1	protein-coding	6.24	25.4	5.43	2.37	0	3.66	1.56	-2.69516
chr3	122417057	122417557	intron (NM_017554, intron 5 of 16)	intron (NM_017554, intron 5 of 16)	17635	NM_017554	54625	Hs.518203	NM_017554	ENSG00000173193	PARP14	ARTD8|BAL2|PARP-14|pART8	poly(ADP-ribose) polymerase family member 14	protein-coding	6.24	10.19	3.26	1.58	0.82	0.37	1.56	-2.67464
chr12	48257218	48257718	intron (NM_001017536, intron 4 of 9)	intron (NM_001017536, intron 4 of 9)	41346	NM_001017536	7421	Hs.524368	NM_000376	ENSG00000111424	VDR	NR1I1|PPP1R163	vitamin D (1,25- dihydroxyvitamin D3) receptor	protein-coding	16.51	24.11	9.09	3.64	2.47	4.03	2.08	-2.54247
chr21	40275688	40276188	intron (NR_120405, intron 2 of 3)	intron (NR_120405, intron 2 of 3)	34415	NR_120405	400867	Hs.689509	NR_120405		LOC400867	-	uncharacterized LOC400867	ncRNA	19.63	33.65	6.32	4.12	1.65	3.85	2.08	-2.71504
chr2	228786252	228786752	intron (NR_138459, intron 13 of 13)	intron (NR_138459, intron 13 of 13)	50410	NR_138459	164781	Hs.424594	NM_178821	ENSG00000123977	DAW1	ODA16|WDR69	dynein assembly factor with WD repeats 1	protein-coding	1.1	1.29	2.37	12.35	14	10.07	7.98	3.26264
chr1	220488373	220488873	Intergenic	Intergenic	-42780	NM_012414	25782	Hs.654849	NM_012414	ENSG00000118873	RAB3GAP2	RAB3-GAP150|RAB3GAP150|SPG69|WARBM2|p150	RAB3 GTPase activating non-catalytic protein subunit 2	protein-coding	6.24	11.97	3.95	1.42	1.92	2.2	0.87	-2.38375
chr12	88054662	88055162	Intergenic	MLT1F|LTR|ERVL-MaLR	123576	NR_033410	400058	Hs.572212	NR_033410		MKRN9P	MKRN5|MKRN9|MKRNP6|RNF65|ZNF127L3	makorin ring finger protein 9, pseudogene	pseudo	7.34	15.86	8.1	2.85	2.74	2.01	2.78	-2.39939
chr1	106175242	106175931	Intergenic	LTR38B|LTR|ERV1	-14030	NR_125955	101928476	Hs.563856	NR_125954	ENSG00000230768	LINC01676	-	long intergenic non-protein coding RNA 1676	ncRNA	4.4	2.1	4.94	14.88	13.45	9.89	10.41	2.91157
chr18	71892342	71892842	Intergenic	MER49|LTR|ERV1	66659	NM_001914	1528	Hs.465413	NM_001914	ENSG00000166347	CYB5A	CYB5|MCB5	cytochrome b5 type A	protein-coding	2.57	2.1	2.96	15.67	14.27	12.27	12.32	2.37383
chr13	106748232	106748732	Intergenic	Intergenic	-280429	NR_034119	728192	Hs.559194	NR_034119		LINC00460	-	long intergenic non-protein coding RNA 460	ncRNA	1.83	1.62	1.88	8.23	12.35	4.76	11.1	2.33391
chr1	43487180	43488017	Intergenic	Intergenic	-62752	NM_006516	6513	Hs.473721	NM_006516	ENSG00000117394	SLC2A1	CSE|DYT17|DYT18|DYT9|EIG12|GLUT|GLUT-1|GLUT1|GLUT1DS|HTLVR|PED|SDCHCN	solute carrier family 2 member 1	protein-coding	28.98	55.01	12.25	4.75	4.94	6.04	3.82	-2.53544
chr6	132302056	132302556	Intergenic	Intergenic	-29788	NM_001901	1490	Hs.410037	NM_001901	ENSG00000118523	CTGF	CCN2|HCS24|IGFBP8|NOV2	connective tissue growth factor	protein-coding	1.28	0.97	1.58	13.93	20.31	12.45	12.14	3.27379
chr5	91688808	91689308	Intergenic	Intergenic	-1009868	NR_138072	57561	Hs.24684	NM_020801	ENSG00000113369	ARRDC3	TLIMP	arrestin domain containing 3	protein-coding	0.37	0.32	1.48	14.88	6.86	6.41	9.02	3.52119
chr9	47196545	47197045	Intergenic	Intergenic	353126	NR_126050	103908605	Hs.721139	NR_126050		LOC103908605	-	uncharacterized LOC103908605	ncRNA	0.73	0.65	0.89	7.91	13.72	3.3	1.73	2.94508
chr2	113436980	113437480	Intergenic	MLT1H1|LTR|ERVL-MaLR	33796	NM_005415	6574	Hs.187946	NM_005415	ENSG00000144136	SLC20A1	GLVR1|Glvr-1|PIT1|PiT-1	solute carrier family 20 member 1	protein-coding	6.6	32.36	6.52	2.22	3.57	2.2	2.26	-2.39461
chr3	116143943	116144443	intron (NM_002338, intron 1 of 6)	intron (NM_002338, intron 1 of 6)	20192	NM_002338	4045	Hs.26409	NM_002338	ENSG00000185565	LSAMP	IGLON3|LAMP	limbic system-associated membrane protein	protein-coding	2.02	1.62	1.48	10.29	20.58	15.2	10.24	2.95983
chr1	19360408	19360908	Intergenic	Intergenic	-77832	NM_001136265	126917	Hs.466625	NM_001136265	ENSG00000169991	IFFO2	-	intermediate filament family orphan 2	protein-coding	17.24	48.21	7.51	2.06	3.02	4.94	2.08	-2.79126
chr15	94110002	94110502	Intergenic	Intergenic	-289537	NR_120321	101927153	Hs.371900	NR_120321		LOC101927153	-	uncharacterized LOC101927153	ncRNA	16.69	44.82	7.11	1.74	4.94	4.21	3.64	-2.48251
chr5	35185611	35186111	intron (NM_000949, intron 1 of 9)	intron (NM_000949, intron 1 of 9)	44830	NM_000949	5618	Hs.368587	NM_000949	ENSG00000113494	PRLR	HPRL|MFAB|hPRLrI	prolactin receptor	protein-coding	1.83	2.1	2.07	25.8	13.17	5.13	13.71	3.05255
chr5	139599164	139599664	intron (NM_032412, intron 2 of 2)	intron (NM_032412, intron 2 of 2)	44761	NM_032412	84418	Hs.529798	NM_032412	ENSG00000120306	CYSTM1	C5orf32|ORF1-FL49	cysteine rich transmembrane module containing 1	protein-coding	0.92	2.59	1.38	25.96	16.19	10.07	20.3	3.95724
chr16	30921896	30922396	Intergenic	Intergenic	-12230	NM_001282351	54620	Hs.152149	NM_019085	ENSG00000099364	FBXL19	CXXC11|Fbl19|JHDM1C	F-box and leucine rich repeat protein 19	protein-coding	9.17	38.83	8.2	2.53	2.47	3.66	2.95	-2.46271
chr8	95315845	95316345	Intergenic	Intergenic	-41548	NM_005261	2669	Hs.654463	NM_005261	ENSG00000164949	GEM	KIR	GTP binding protein overexpressed in skeletal muscle	protein-coding	10.09	53.55	9.98	1.9	5.76	3.48	5.73	-2.47176
chr10	1474330	1474830	intron (NM_018702, intron 1 of 9)	intron (NM_018702, intron 1 of 9)	-94245	NR_033387	642394	Hs.568831	NM_001098830	ENSG00000205696	ADARB2-AS1	C10orf109|NCRNA00168|bA466B20.1	ADARB2 antisense RNA 1	ncRNA	1.28	0.97	1.38	12.5	5.76	4.03	6.77	2.43926
chr3	167695862	167696362	Intergenic	Intergenic	82376	NR_033843	646168	Hs.390443	NR_033843	ENSG00000244227	LINC01330	-	long intergenic non-protein coding RNA 1330	pseudo	2.38	2.43	2.86	13.93	19.21	14.65	8.5	2.42394
chr5	19322773	19323273	Intergenic	MLT1H|LTR|ERVL-MaLR	563358	NM_001291957	1016	Hs.317632	NM_004934	ENSG00000145526	CDH18	CDH14|CDH14L|CDH24	cadherin 18	protein-coding	10.27	15.53	4.94	1.42	1.1	2.01	2.08	-2.78897
chr1	15556276	15556776	Intergenic	MER20|DNA|hAT-Charlie	-17242	NM_052929	114827	Hs.659997	NM_052929	ENSG00000142621	FHAD1	-	forkhead associated phosphopeptide binding domain 1	protein-coding	1.1	2.91	1.88	16.3	12.9	10.07	23.6	3.3488
chr5	127293958	127294729	Intergenic	Intergenic	124422	NR_015360	644873	Hs.340623	NR_015360	ENSG00000245937	LINC01184	-	long intergenic non-protein coding RNA 1184	ncRNA	5.5	8.57	3.36	28.02	20.86	18.13	27.59	2.38866
chr1	50940463	50940963	intron (NM_007051, intron 18 of 18)	L3|LINE|CR1	-51594	NM_032110	63950	Hs.334481	NM_032110	ENSG00000142700	DMRTA2	-	DMRT like family A2	protein-coding	2.2	0.81	1.98	17.41	8.78	6.59	11.1	2.38649
chr13	71932298	71932798	Intergenic	Intergenic	343275	NR_047699	100885781	Hs.372660	NR_047699	ENSG00000226846	LINC00348	-	long intergenic non-protein coding RNA 348	ncRNA	0.37	0.49	1.48	6.49	9.06	5.13	12.14	3.29807
chr2	158252248	158252748	Intergenic	Intergenic	48106	NM_004288	9595	Hs.270	NM_004288	ENSG00000115165	CYTIP	B3-1|CASP|CYBR|CYTHIP|HE|PSCDBP	cytohesin 1 interacting protein	protein-coding	0.55	0.65	1.58	12.19	11.8	6.96	16.48	3.42735
chr2	214726264	214726764	intron (NR_047660, intron 9 of 14)	intron (NR_047660, intron 9 of 14)	103723	NR_039640	100616375		NR_039640	ENSG00000265734	MIR4438	-	microRNA 4438	ncRNA	2.57	0	1.58	13.45	19.49	5.49	5.03	2.45748
chr3	152814524	152815024	Intergenic	LTR8|LTR|ERV1	-65227	NM_002886	5912	Hs.98643	NM_002886	ENSG00000181467	RAP2B	-	RAP2B, member of RAS oncogene family	protein-coding	2.2	0.81	2.07	13.93	9.88	9.15	10.41	2.39246
chr8	53013267	53013988	Intergenic	Intergenic	-93294	NR_134310	101929341	Hs.147170	NR_134310	ENSG00000253551	LOC101929341	-	uncharacterized LOC101929341	ncRNA	5.69	8.41	7.01	24.38	28.54	13.55	13.88	2.5251
chr2	40952167	40952667	Intergenic	Intergenic	-212842	NM_001112802	6546	Hs.31961	NM_021097	ENSG00000183023	SLC8A1	NCX1	solute carrier family 8 member A1	protein-coding	6.97	15.21	5.14	2.53	0	1.83	1.56	-2.86783
chr11	27417023	27417523	intron (NM_001346432, intron 1 of 16)	intron (NM_001346432, intron 1 of 16)	-32478	NM_080654	91057	Hs.143733	NM_030771	ENSG00000109881	CCDC34	L15|NY-REN-41|RAMA3	coiled-coil domain containing 34	protein-coding	1.1	1.29	1.68	10.45	15.37	8.61	11.1	2.90349
chr1	220907782	220908282	Intergenic	Intergenic	-13556	NM_001317338	54996	Hs.369042	NM_017898	ENSG00000117791	MARC2	MOSC2	mitochondrial amidoxime reducing component 2	protein-coding	2.2	1.78	1.58	7.91	12.62	6.77	6.42	2.63979
chr1	223423643	223424143	intron (NM_001037175, intron 5 of 5)	MIRb|SINE|MIR	-107269	NM_003268	7100	Hs.604542	NM_003268	ENSG00000187554	TLR5	MELIOS|SLE1|SLEB1|TIL3	toll like receptor 5	protein-coding	12.47	22.81	5.73	4.75	2.2	1.46	1.56	-2.43031
chr6	82547635	82548135	Intergenic	Intergenic	-23976	NR_126363	101928770	Hs.586239	NR_126363	ENSG00000224995	LINC01526	Lnc-FAM46A-1	long intergenic non-protein coding RNA 1526	ncRNA	1.83	1.13	0.99	20.1	14.55	13.37	17.7	3.50641
chr9	109829964	109830464	intron (NR_126029, intron 3 of 4)	MER57B2|LTR|ERV1	35055	NR_126029	340512	Hs.432529	NR_126029	ENSG00000230782	LOC340512	-	uncharacterized LOC340512	ncRNA	1.65	2.43	2.96	32.61	18.94	14.46	16.14	2.95146
chr6	80318496	80318996	Intergenic	Intergenic	-22076	NM_031469	83699	Hs.302772	NM_031469	ENSG00000198478	SH3BGRL2	-	SH3 domain binding glutamate rich protein like 2	protein-coding	2.75	2.1	3.85	24.85	25.25	14.1	22.9	2.97353
chr9	32426995	32427495	intron (NM_002197, intron 11 of 20)	intron (NM_002197, intron 11 of 20)	42644	NM_002197	48	Hs.567229	NM_002197	ENSG00000122729	ACO1	ACONS|HEL60|IREB1|IREBP|IREBP1|IRP1	aconitase 1	protein-coding	1.28	1.94	1.78	15.99	12.62	3.3	8.67	2.49025
chr10	79708892	79709392	Intergenic	Intergenic	22572	NR_024585	100128292	Hs.547908	NR_024585		DLG5-AS1	-	DLG5 antisense RNA 1	ncRNA	12.47	37.05	5.53	2.06	1.65	1.83	6.25	-2.62667
chr9	100924941	100925441	intron (NM_052820, intron 1 of 11)	intron (NM_052820, intron 1 of 11)	9983	NM_003389	7464	Hs.113094	NM_003389	ENSG00000106789	CORO2A	CLIPINB|IR10|WDR2	coronin 2A	protein-coding	16.51	39.96	8.69	4.43	4.12	3.48	3.3	-2.43093
chr12	22715049	22715549	Intergenic	L2|LINE|L2	-17819	NM_014802	9847	Hs.271014	NM_014802	ENSG00000111731	C2CD5	CDP138|KIAA0528	C2 calcium dependent domain containing 5	protein-coding	2.2	1.29	0.79	12.03	9.61	7.14	12.49	2.64973
chr12	101006335	101006835	intron (NM_001303130, intron 5 of 8)	intron (NM_001303130, intron 5 of 8)	19189	NM_001303131	283431	Hs.20575	NM_174942	ENSG00000139354	GAS2L3	G2L3	growth arrest specific 2 like 3	protein-coding	2.38	1.78	2.17	11.4	21.13	9.15	10.06	2.73323
chr8	96112578	96113632	Intergenic	MIRc|SINE|MIR	-27695	NR_132986	105375650	Hs.665518	NR_132986	ENSG00000245080	LOC105375650	-	uncharacterized LOC105375650	ncRNA	9.17	6.31	4.74	38.94	29.64	24.17	39.9	2.37821
chr1	234783430	234783930	intron (NR_125944, intron 1 of 3)	intron (NR_125944, intron 1 of 3)	1645	NR_125944	101927787	Hs.520658	NR_125944	ENSG00000228044	LOC101927787	-	uncharacterized LOC101927787	ncRNA	9.91	15.53	4.94	1.27	3.84	2.01	1.21	-2.60321
chr2	151166147	151166647	Intergenic	L1PA12|LINE|L1	177812	NM_005168	390	Hs.6838	NM_005168	ENSG00000115963	RND3	ARHE|Rho8|RhoE|memB	Rho family GTPase 3	protein-coding	3.85	5.66	3.65	24.22	24.43	17.58	14.57	2.42754
chr13	74595511	74596011	intron (NM_007249, intron 1 of 7)	MER63A|DNA|hAT-Blackjack	112305	NM_007249	11278	Hs.373857	NM_007249	ENSG00000118922	KLF12	AP-2rep|AP2REP|HSPC122	Kruppel like factor 12	protein-coding	1.65	1.46	1.98	15.51	13.17	5.49	10.06	2.61355
chr3	177806646	177807146	Intergenic	Intergenic	272243	NR_110826	102724550	Hs.570526	NR_110826	ENSG00000231574	LINC02015	KCCAT211	long intergenic non-protein coding RNA 2015	ncRNA	2.02	0	1.48	7.91	14	8.24	5.03	2.58142
chr2	230918721	230919221	intron (NM_152527, intron 2 of 4)	intron (NM_152527, intron 2 of 4)	14744	NM_152527	151473	Hs.504317	NM_152527	ENSG00000163053	SLC16A14	MCT14	solute carrier family 16 member 14	protein-coding	10.27	17.63	3.36	1.42	2.2	3.66	1.91	-2.55561
chr12	115821428	115821928	Intergenic	Intergenic	-699709	NM_005996	6926	Hs.744016	NM_005996	ENSG00000135111	TBX3	TBX3-ISO|UMS|XHL	T-box 3	protein-coding	13.02	42.87	5.33	3.8	3.29	2.01	2.95	-2.7278
chr18	49424230	49424730	Intergenic	MLT1I|LTR|ERVL-MaLR	-442062	NM_005215	1630	Hs.162025	NM_005215	ENSG00000187323	DCC	CRC18|CRCR1|IGDCC1|MRMV1|NTN1R1	DCC netrin 1 receptor	protein-coding	2.75	0.81	1.58	6.49	16.74	9.34	9.72	2.4111
chr1	65573525	65574361	Intergenic	Intergenic	-39289	NM_203464	205	Hs.10862	NM_013410	ENSG00000162433	AK4	AK 4|AK3|AK3L1|AK3L2	adenylate kinase 4	protein-coding	2.93	2.43	2.67	30.39	37.87	23.44	44.24	3.43559
chr6	47427935	47428435	Intergenic	Intergenic	-17340	NM_012120	23607	Hs.485518	NM_012120	ENSG00000198087	CD2AP	CMS	CD2 associated protein	protein-coding	2.2	4.53	2.47	33.4	25.8	12.08	24.64	2.9913
chr6	168662456	168663177	non-coding (NR_110870, exon 5 of 5)	non-coding (NR_110870, exon 5 of 5)	19199	NR_110870	101929420	Hs.571211	NR_110870	ENSG00000234647	LOC101929420	-	uncharacterized LOC101929420	ncRNA	2.75	7.44	4.64	22.79	12.62	11.72	20.65	2.50578
chr13	109480277	109480777	intron (NM_001198950, intron 9 of 34)	intron (NM_001198950, intron 9 of 34)	198956	NM_001198950	23026	Hs.656587	NM_015011	ENSG00000041515	MYO16	MYAP3|MYR8|Myo16b|NYAP3|PPP1R107	myosin XVI	protein-coding	1.83	0.32	2.37	18.99	9.88	6.04	8.33	2.77547
chr15	86879200	86879700	intron (NM_152336, intron 17 of 24)	intron (NM_152336, intron 17 of 24)	-19251	NR_046012	727915	Hs.451281	NR_046012	ENSG00000260125	AGBL1-AS1	-	AGBL1 antisense RNA 1	ncRNA	16.51	21.03	6.72	1.9	2.47	2.2	2.08	-2.69164
chr2	47537239	47537739	intron (NR_110207, intron 1 of 2)	intron (NR_110207, intron 1 of 2)	34724	NR_110207	101927043	Hs.515976	NR_110207	ENSG00000234690	LOC101927043	-	uncharacterized LOC101927043	ncRNA	2.2	3.4	2.57	13.14	22.78	15.93	24.46	3.00682
chr6	45581344	45581844	Intergenic	Intergenic	191280	NM_001278478	860	Hs.535845	NM_004348	ENSG00000124813	RUNX2	AML3|CBF-alpha-1|CBFA1|CCD|CCD1|CLCD|OSF-2|OSF2|PEA2aA|PEBP2aA	runt related transcription factor 2	protein-coding	16.33	23.14	5.53	2.69	3.84	1.46	2.95	-2.52719
chr3	43220428	43220928	Intergenic	Intergenic	-73103	NM_032806	84892	Hs.745002	NM_032806	ENSG00000144647	POMGNT2	AGO61|C3orf39|GTDC2|MDDGA8	protein O-linked mannose N-acetylglucosaminyltransferase 2 (beta 1,4-)	protein-coding	2.75	4.04	3.95	10.76	16.74	16.66	21.34	2.33594
chr1	162843752	162844252	Intergenic	Intergenic	-5397	NM_178550	339512	Hs.407631	NM_178550	ENSG00000185860	CCDC190	C1orf110	coiled-coil domain containing 190	protein-coding	1.83	1.13	1.38	20.26	18.94	10.62	23.77	4.0524
chr2	206839993	206840493	Intergenic	Intergenic	110663	NM_017759	54891	Hs.445036	NM_017759	ENSG00000114933	INO80D	-	INO80 complex subunit D	protein-coding	2.57	2.27	2.47	21.84	26.62	10.8	19.08	3.15554
chr3	12800671	12801317	promoter-TSS (NM_001284407)	promoter-TSS (NM_001284407)	-186	NM_018306	55287	Hs.475502	NM_018306	ENSG00000088726	TMEM40	-	transmembrane protein 40	protein-coding	26.97	61.32	13.04	8.23	7.14	4.58	6.94	-2.36516
chr2	159618135	159618635	Intergenic	Intergenic	-26871	NR_135242	100129029	Hs.630724	NR_135242	ENSG00000204380	PKP4-AS1	-	PKP4 antisense RNA 1	ncRNA	19.99	50.64	6.32	3.32	1.65	2.93	1.73	-3.40613
chr5	10202449	10202949	Intergenic	Intergenic	47322	NR_047669	134145	Hs.481569	NM_199133	ENSG00000150756	FAM173B	JS-2	family with sequence similarity 173 member B	protein-coding	8.25	15.05	4.05	3.01	0.27	1.1	1.91	-2.4715
chr9	15333336	15333836	Intergenic	Intergenic	-26228	NM_152574	158219	Hs.563630	NM_152574	ENSG00000155158	TTC39B	C9orf52	tetratricopeptide repeat domain 39B	protein-coding	4.4	2.27	1.88	17.09	19.21	11.54	14.57	2.50622
chr4	171147330	171147830	promoter-TSS (NR_125889)	promoter-TSS (NR_125889)	-162	NR_125889	101928223	Hs.254617	NR_125889		LINC01612	-	long intergenic non-protein coding RNA 1612	ncRNA	2.38	3.56	2.96	32.45	29.64	12.08	4.51	3.01619
chr5	72950286	72950786	intron (NM_001177693, intron 1 of 35)	intron (NM_001177693, intron 1 of 35)	28553	NM_001080479	64283	Hs.482521	NM_001080479	ENSG00000214944	ARHGEF28	RGNEF|RIP2|p190RHOGEF	Rho guanine nucleotide exchange factor 28	protein-coding	17.24	27.83	6.22	1.74	1.1	3.3	3.3	-2.75316
chr10	71145116	71145616	intron (NM_001322365, intron 17 of 22)	intron (NM_001322365, intron 17 of 22)	31308	NM_001057	6865	Hs.88372	NM_001057	ENSG00000075073	TACR2	NK2R|NKNAR|SKR|TAC2R	tachykinin receptor 2	protein-coding	21.65	42.71	7.01	6.17	5.21	2.2	3.82	-2.42504
chr3	100633015	100633515	intron (NM_015429, intron 2 of 34)	intron (NM_015429, intron 2 of 34)	79069	NM_015429	25890	Hs.477015	NM_015429	ENSG00000154175	ABI3BP	NESHBP|TARSH	ABI family member 3 binding protein	protein-coding	10.64	16.83	6.02	2.06	2.74	1.65	2.78	-2.40139
chr5	177407822	177408322	Intergenic	Intergenic	15171	NM_006261	5626	Hs.158301	NM_006261	ENSG00000175325	PROP1	CPHD2|PROP-1	PROP paired-like homeobox 1	protein-coding	11.01	36.24	6.91	4.75	2.47	3.48	2.95	-2.33157
chr6	92084892	92085392	Intergenic	L2|LINE|L2	-146236	NR_039786	100616174		NR_039786	ENSG00000263734	MIR4643	-	microRNA 4643	ncRNA	0.73	0.32	1.38	9.5	21.68	6.96	16.83	3.83275
chr12	121352551	121353051	Intergenic	Intergenic	10303	NR_131215	105500240	Hs.742757	NR_131215		XLOC_009911	-	uncharacterized LOC105500240	ncRNA	11.92	17.31	3.56	1.27	2.47	0.73	1.21	-2.86485
chr12	75013605	75014105	Intergenic	MLT2B3|LTR|ERVL	82304	NM_001136262	552889	Hs.744849	NM_001136262	ENSG00000253719	ATXN7L3B	lnc-SCA7	ataxin 7 like 3B	protein-coding	0.73	1.94	2.07	12.19	9.88	5.68	9.89	2.47008
chr7	101372679	101373179	Intergenic	Intergenic	-86255	NM_001913	1523	Hs.191482	NM_001913	ENSG00000257923	CUX1	CASP|CDP|CDP/Cut|CDP1|COY1|CUTL1|CUX|Clox|Cux/CDP|GOLIM6|Nbla10317|p100|p110|p200|p75	cut like homeobox 1	protein-coding	3.67	5.5	3.06	14.72	11.53	15.38	30.54	2.53192
chr15	73867909	73868723	intron (NM_001161364, intron 3 of 7)	intron (NM_001161364, intron 3 of 7)	-6432	NR_103844	101241892	Hs.656678	NR_103844	ENSG00000281183	NPTN-IT1	lncRNA-LET	NPTN intronic transcript 1	ncRNA	17.98	30.25	8.59	5.7	3.02	4.94	2.43	-2.55037
chr4	175459928	175460428	Intergenic	Intergenic	-16129	NM_000860	3248	Hs.596913	NM_000860	ENSG00000164120	HPGD	15-PGDH|PGDH|PGDH1|PHOAR1|SDR36C1	hydroxyprostaglandin dehydrogenase 15-(NAD)	protein-coding	8.62	15.53	4.25	2.22	1.1	3.3	1.21	-2.4031
chr2	30173361	30173861	Intergenic	Intergenic	-29134	NM_004304	238	Hs.654469	NM_004304	ENSG00000171094	ALK	CD246|NBLST3	anaplastic lymphoma receptor tyrosine kinase	protein-coding	15.41	23.3	5.63	2.69	2.74	2.56	3.12	-2.56168
chr9	78664239	78664739	intron (NM_006200, intron 5 of 20)	intron (NM_006200, intron 5 of 20)	158929	NM_001190482	5125	Hs.368542	NM_006200	ENSG00000099139	PCSK5	PC5|PC6|PC6A|SPC6	proprotein convertase subtilisin/kexin type 5	protein-coding	1.1	2.59	3.16	32.61	24.97	15.01	18.91	3.1931
chr16	30501464	30501964	intron (NM_002209, intron 11 of 30)	MER74B|LTR|ERVL	-13526	NR_039743	100616405		NR_039743	ENSG00000266305	MIR4518	mir-4518	microRNA 4518	ncRNA	12.29	19.41	3.16	1.58	2.2	2.2	2.26	-2.35227
chr4	173927338	173927838	intron (NM_001034845, intron 10 of 12)	intron (NM_001034845, intron 10 of 12)	-162316	NM_017423	51809	Hs.548088	NM_017423	ENSG00000109586	GALNT7	GALNAC-T7|GalNAcT7	polypeptide N-acetylgalactosaminyltransferase 7	protein-coding	1.65	2.27	1.58	8.23	5.49	8.06	6.07	2.74314
chr5	146520105	146520605	Intergenic	LTR22|LTR|ERVK	-59272	NM_001271899	5521	Hs.627618	NM_181674	ENSG00000156475	PPP2R2B	B55BETA|PP2AB55BETA|PP2ABBETA|PP2APR55B|PP2APR55BETA|PR2AB55BETA|PR2ABBETA|PR2APR55BETA|PR52B|PR55-BETA|PR55BETA|SCA12	protein phosphatase 2 regulatory subunit Bbeta	protein-coding	2.02	2.91	1.58	9.5	13.72	6.41	6.94	2.44325
chr12	89769358	89769858	Intergenic	Intergenic	-22972	NM_022652	1848	Hs.298654	NM_001946	ENSG00000139318	DUSP6	HH19|MKP3|PYST1	dual specificity phosphatase 6	protein-coding	5.14	8.09	3.46	21.53	14	17.94	32.1	2.42414
chr14	104048559	104049059	intron (NM_001302653, intron 4 of 5)	intron (NM_001302653, intron 4 of 5)	19515	NR_126431	84334	Hs.598441	NM_032374	ENSG00000256053	APOPT1	APOP|APOP1|C14orf153	apoptogenic 1, mitochondrial	protein-coding	16.69	26.37	7.51	1.58	1.1	4.03	3.47	-2.85018
chr6	135147969	135148469	Intergenic	Intergenic	123041	NM_170771	64577	Hs.486520	NM_022568	ENSG00000118514	ALDH8A1	ALDH12|DJ352A20.2	aldehyde dehydrogenase 8 family member A1	protein-coding	15.96	23.14	6.22	2.69	3.29	2.38	1.73	-2.58846
chr1	119503180	119503680	intron (NM_152380, intron 1 of 7)	intron (NM_152380, intron 1 of 7)	27046	NM_001330677	6913	Hs.146196	NM_152380	ENSG00000092607	TBX15	TBX14	T-box 15	protein-coding	2.57	2.59	3.36	26.43	32.38	21.06	24.12	3.14632
chr3	177017840	177018340	intron (NR_047465, intron 1 of 1)	intron (NR_047465, intron 1 of 1)	5860	NR_047465	100820709	Hs.518409	NR_047465	ENSG00000203645	LINC00501	-	long intergenic non-protein coding RNA 501	ncRNA	3.3	5.82	4.84	26.75	35.4	19.41	22.73	2.5321
chr9	111113841	111114341	Intergenic	Intergenic	504184	NM_006686	10880	Hs.534390	NM_006686	ENSG00000148156	ACTL7B	Tact1	actin like 7B	protein-coding	9.72	18.93	3.65	1.74	3.02	2.2	1.39	-2.35615
chr7	17134516	17135016	Intergenic	Intergenic	-203510	NM_001621	196	Hs.171189	NM_001621	ENSG00000106546	AHR	bHLHe76	aryl hydrocarbon receptor	protein-coding	16.69	23.62	7.7	3.32	4.67	2.38	1.73	-2.3493
chr4	34734842	34735342	Intergenic	L2|LINE|L2	-693577	NR_125902	101928622	Hs.631687	NR_125902	ENSG00000250954	LOC101928622	-	uncharacterized LOC101928622	ncRNA	1.47	1.46	2.07	22.16	21.41	7.32	6.25	3.05427
chr3	3884009	3884509	intron (NM_001324188, intron 2 of 2)	intron (NM_001324188, intron 2 of 2)	43144	NM_020873	57633	Hs.163244	NM_020873	ENSG00000175928	LRRN1	FIGLER3|NLRR-1	leucine rich repeat neuronal 1	protein-coding	1.1	0.97	1.78	11.08	8.78	6.96	6.77	2.43691
chr8	139288330	139288830	intron (NM_015912, intron 3 of 19)	intron (NM_015912, intron 3 of 19)	220485	NM_015912	51059	Hs.126024	NM_015912	ENSG00000147724	FAM135B	C8ORFK32	family with sequence similarity 135 member B	protein-coding	2.2	4.85	3.85	33.56	27.72	10.25	7.81	2.62115
chr21	18899398	18900120	intron (NM_001207063, intron 1 of 4)	intron (NM_001207063, intron 1 of 4)	14535	NM_001207063	1525	Hs.627078	NM_001338	ENSG00000154639	CXADR	CAR|CAR4/6|HCAR	coxsackie virus and adenovirus receptor	protein-coding	2.02	1.78	2.57	24.69	15.37	10.8	19.26	2.90662
chr3	167694824	167695324	Intergenic	Intergenic	81338	NR_033843	646168	Hs.390443	NR_033843	ENSG00000244227	LINC01330	-	long intergenic non-protein coding RNA 1330	pseudo	1.65	1.94	2.37	10.29	13.45	7.51	10.41	2.73524
chr10	59388299	59388799	Intergenic	Intergenic	-324230	NR_037490	100500834		NR_037490	ENSG00000264747	MIR3924	-	microRNA 3924	ncRNA	0.92	0.65	2.27	9.97	14.82	7.51	6.94	3.07081
chr17	12439242	12439742	Intergenic	Intergenic	-13793	NR_034145	284034	Hs.376614	NR_034144	ENSG00000179136	LINC00670	-	long intergenic non-protein coding RNA 670	ncRNA	0.92	2.1	2.27	24.69	10.15	5.13	11.28	2.99347
chr4	26060075	26060575	Intergenic	Intergenic	144511	NM_001145432	389203	Hs.479386	NM_001145432	ENSG00000250317	SMIM20	C4orf52|MITRAC7	small integral membrane protein 20	protein-coding	13.57	32.03	6.81	4.59	4.39	1.83	2.78	-2.43684
chr1	96133680	96134180	Intergenic	L1ME2|LINE|L1	158258	NR_110622	100996635	Hs.639548	NR_110621	ENSG00000228971	LOC100996635	-	uncharacterized LOC100996635	ncRNA	1.65	1.62	1.19	7.91	12.08	8.24	6.59	2.49546
chr12	21597062	21597562	intron (NM_024854, intron 2 of 11)	L2a|LINE|L2	6774	NM_024854	79912	Hs.709545	NM_024854	ENSG00000121350	PYROXD1	MFM8	pyridine nucleotide-disulphide oxidoreductase domain 1	protein-coding	1.47	0.81	1.19	16.78	8.78	10.07	17	3.44157
chr6	113964185	113964685	intron (NR_125844, intron 1 of 2)	intron (NR_125844, intron 1 of 2)	6842	NR_125844	101927686	Hs.402044	NR_125844	ENSG00000230943	LOC101927686	-	uncharacterized LOC101927686	ncRNA	1.28	2.27	1.98	24.22	18.66	14.83	17.87	3.97846
chr8	135814425	135814925	Intergenic	Intergenic	-1825	NR_029666	407030		NR_029666	ENSG00000207582	MIR30B	MIRN30B|mir-30b	microRNA 30b	ncRNA	0.92	1.46	1.28	4.75	14	9.15	7.98	3.04623
chr16	80185619	80186119	Intergenic	Intergenic	356723	NR_104661	101928248	Hs.659802	NR_104660	ENSG00000260876	LINC01229	-	long intergenic non-protein coding RNA 1229	ncRNA	1.1	3.24	1.78	5.22	13.45	11.9	3.99	2.33771
chr4	97514597	97515097	Intergenic	Intergenic	753608	NM_005390	5161	Hs.131361	NM_005390	ENSG00000163114	PDHA2	PDHAL	pyruvate dehydrogenase (lipoamide) alpha 2	protein-coding	0.37	0.81	2.96	18.99	10.98	5.68	5.2	2.43819
chr14	90114837	90115337	Intergenic	Intergenic	-29593	NM_001085471	1112	Hs.434286	NM_005197	ENSG00000053254	FOXN3	C14orf116|CHES1|PRO1635	forkhead box N3	protein-coding	1.28	0.97	1.28	9.34	11.25	8.06	12.67	3.0683
chr15	38940264	38940764	Intergenic	Intergenic	-48285	NM_207444	400359	Hs.448785	NM_207444	ENSG00000175779	C15orf53	-	chromosome 15 open reading frame 53	protein-coding	7.34	14.4	3.46	1.58	1.1	0.92	1.56	-2.7109
chr9	114111081	114111581	Intergenic	LTR44|LTR|ERV1	-20618	NM_205859	26248	Hs.381312	NM_205859	ENSG00000171133	OR2K2	HSHTPCRH06|HTPCRH06|OR2AN1P|OR2AR1P	olfactory receptor family 2 subfamily K member 2	protein-coding	1.47	1.94	1.09	20.58	17.84	12.63	13.71	3.48453
chr10	129955182	129955682	Intergenic	Intergenic	-30964	NM_001145966	4288	Hs.80976	NM_002417	ENSG00000148773	MKI67	KIA|MIB-|MIB-1|PPP1R105	marker of proliferation Ki-67	protein-coding	1.65	3.4	3.85	19.47	18.39	12.82	11.62	2.40255
chr9	2570705	2571205	intron (NR_015375, intron 1 of 3)	intron (NR_015375, intron 1 of 3)	-50819	NM_001018056	7436	Hs.370422	NM_003383	ENSG00000147852	VLDLR	CAMRQ1|CARMQ1|CHRMQ1|VLDL-R|VLDLRCH	very low density lipoprotein receptor	protein-coding	3.12	2.59	2.27	12.82	15.64	6.41	14.23	2.34987
chr3	173429344	173429844	intron (NM_014932, intron 3 of 6)	intron (NM_014932, intron 3 of 6)	208992	NR_046664	100874010	Hs.624265	NR_046664	ENSG00000228213	NLGN1-AS1	-	NLGN1 antisense RNA 1	ncRNA	3.3	0.65	1.58	18.52	15.92	15.75	18.91	3.06107
chr7	155411362	155411862	Intergenic	Intergenic	25488	NR_126344	100506302	Hs.87856	NR_126344	ENSG00000216895	LOC100506302	-	uncharacterized LOC100506302	ncRNA	3.12	2.43	2.57	30.07	23.88	17.21	29.32	3.18265
chr7	98827529	98828029	Intergenic	L1PA15|LINE|L1	-22667	NM_001145715	402569	Hs.253050	NM_001145715	ENSG00000185467	KPNA7	IPOA8	karyopherin subunit alpha 7	protein-coding	3.12	2.59	1.98	13.61	9.06	7.69	22.73	2.60191
chr1	26050629	26051129	intron (NM_020379, intron 2 of 11)	intron (NM_020379, intron 2 of 11)	-75788	NM_020451	57190	Hs.323396	NM_020451	ENSG00000162430	SELENON	CFTD|MDRS1|RSMD1|RSS|SELN|SEPN1	selenoprotein N	protein-coding	12.66	33.33	5.14	1.9	1.65	2.38	3.82	-2.56217
chr13	44733656	44734156	intron (NM_024058, intron 2 of 2)	intron (NM_024058, intron 2 of 2)	1487	NM_024058	79024	Hs.730073	NM_024058	ENSG00000139656	SMIM2	C13orf44	small integral membrane protein 2	protein-coding	7.7	22.33	5.23	1.9	0	0.92	2.6	-3.32135
chr20	57623009	57623509	Intergenic	L2c|LINE|L2	-5358	NM_016045	51012	Hs.656865	NM_016045	ENSG00000101166	PRELID3B	C20orf45|SLMO2|dJ543J19.5	PRELI domain containing 3B	protein-coding	4.04	1.29	3.06	18.36	12.62	13.92	20.82	2.38216
chr7	103032626	103033126	intron (NR_135801, intron 9 of 17)	intron (NR_135801, intron 9 of 17)	44905	NM_001204453	5701	Hs.437366	NM_002803	ENSG00000161057	PSMC2	MSS1|Nbla10058|S7	proteasome 26S subunit, ATPase 2	protein-coding	1.65	1.62	1.38	9.5	7.41	8.97	18.04	2.93835
chr7	140612886	140613386	intron (NM_004333, intron 1 of 17)	L2a|LINE|L2	11428	NM_004333	673	Hs.550061	NM_004333	ENSG00000157764	BRAF	B-RAF1|B-raf|BRAF1|NS7|RAFB1	B-Raf proto-oncogene, serine/threonine kinase	protein-coding	2.02	4.37	1.48	18.36	10.15	9.52	16.48	2.53623
chr6	105493375	105493875	intron (NM_001004317, intron 3 of 3)	intron (NM_001004317, intron 3 of 3)	88702	NM_001004317	389421	Hs.23616	NM_001004317	ENSG00000187772	LIN28B	CSDD2	lin-28 homolog B	protein-coding	1.28	0.81	1.09	4.59	1.37	9.34	12.14	2.81724
chr8	82555984	82556484	Intergenic	Intergenic	42355	NM_005536	3612	Hs.656694	NM_005536	ENSG00000133731	IMPA1	IMP|IMPA	inositol monophosphatase 1	protein-coding	2.57	2.75	1.68	24.85	27.17	12.08	19.26	3.2947
chr21	16673289	16673789	Intergenic	LTR18A|LTR|ERVL	-236413	NM_003489	8204	Hs.155017	NM_003489	ENSG00000180530	NRIP1	RIP140	nuclear receptor interacting protein 1	protein-coding	10.27	16.5	5.43	0.79	0.55	0.92	3.12	-2.92839
chr9	93732862	93733362	Intergenic	Intergenic	104302	NR_033912	100129316	Hs.458154	NR_033912		LOC100129316	-	uncharacterized LOC100129316	ncRNA	10.09	22.16	8.1	1.9	3.84	3.11	1.73	-2.33662
chr3	186358188	186358688	exon (NM_001308079, exon 1 of 5)	exon (NM_001308079, exon 1 of 5)	289	NM_014375	26998	Hs.81073	NM_014375	ENSG00000090512	FETUB	16G2|Gugu|IRL685	fetuin B	protein-coding	20.73	19.9	6.62	3.8	3.57	4.21	1.21	-2.32839
chr2	3527225	3527725	Intergenic	LTR40b|LTR|ERVL	-4125	NM_018269	55256	Hs.502773	NM_018269	ENSG00000182551	ADI1	APL1|ARD|Fe-ARD|HMFT1638|MTCBP1|Ni-ARD|SIPL|mtnD	acireductone dioxygenase 1	protein-coding	2.2	1.94	1.68	19.47	12.9	6.41	13.88	2.95169
chr3	149973105	149973734	Intergenic	Intergenic	16933	NR_110167	101927992	Hs.534682	NR_110167	ENSG00000244541	LINC01213	-	long intergenic non-protein coding RNA 1213	ncRNA	19.44	40.61	11.65	5.38	4.94	3.85	4.34	-3.08088
chr6	50817995	50818495	Intergenic	CpG	31806	NM_003221	7021	Hs.33102	NM_003221	ENSG00000008196	TFAP2B	AP-2B|AP2-B|PDA2	transcription factor AP-2 beta	protein-coding	19.08	50.8	12.44	4.59	2.74	3.11	3.47	-2.76963
chr7	49709222	49710098	Intergenic	Intergenic	-103597	NM_198570	375567	Hs.629302	NM_198570	ENSG00000188730	VWC2	PSST739|UNQ739	von Willebrand factor C domain containing 2	protein-coding	25.5	38.83	11.65	5.54	4.12	3.85	3.12	-2.70315
chr8	74219759	74220259	intron (NM_172037, intron 2 of 5)	intron (NM_172037, intron 2 of 5)	13172	NM_172037	157506	Hs.244940	NM_172037	ENSG00000121039	RDH10	SDR16C4	retinol dehydrogenase 10	protein-coding	4.22	0.65	1.88	15.35	15.37	11.72	14.4	2.34644
chr6	53191353	53191853	intron (NM_001242830, intron 1 of 6)	intron (NM_001242830, intron 1 of 6)	10812	NR_046241	647190	Hs.520189	NR_046241		RPS16P5	RPS16_3_702	ribosomal protein S16 pseudogene 5	pseudo	8.62	26.53	7.11	3.17	2.2	2.56	1.56	-2.34639
chr10	9867284	9867784	Intergenic	MER61E|LTR|ERV1	-233151	NR_120636	101928298	Hs.385576	NR_120636	ENSG00000224788	LOC101928298	-	uncharacterized LOC101928298	ncRNA	3.3	1.62	2.37	25.96	24.97	15.2	20.13	3.06694
chr6	75701476	75701976	Intergenic	Intergenic	213897	NM_080645	1303	Hs.101302	NM_004370	ENSG00000111799	COL12A1	BA209D8.1|BTHLM2|COL12A1L|DJ234P15.1|UCMD2	collagen type XII alpha 1 chain	protein-coding	17.24	16.99	4.74	4.43	2.2	2.38	2.26	-2.33172
chr4	176872907	176873407	intron (NR_048571, intron 1 of 5)	MLT2D|LTR|ERVL	50685	NM_005277	2823	Hs.75819	NM_005277	ENSG00000150625	GPM6A	GPM6|M6A	glycoprotein M6A	protein-coding	3.67	0.97	2.27	18.84	7.96	10.44	13.71	2.3977
chr9	111449687	111450187	Intergenic	Intergenic	168338	NM_006686	10880	Hs.534390	NM_006686	ENSG00000148156	ACTL7B	Tact1	actin like 7B	protein-coding	8.07	27.83	2.77	3.64	1.37	0.92	2.08	-2.6505
chr11	87602531	87603031	Intergenic	Intergenic	-172478	NR_135090	105369423	Hs.125442	NR_135090	ENSG00000255183	LOC105369423	-	uncharacterized LOC105369423	ncRNA	1.28	2.59	2.17	13.14	10.7	5.31	6.77	2.41994
chr9	124088416	124088916	intron (NM_001127667, intron 13 of 18)	intron (NM_001127667, intron 13 of 18)	26587	NM_000177	2934	Hs.522373	NM_000177	ENSG00000148180	GSN	ADF|AGEL	gelsolin	protein-coding	16.69	84.45	15.7	4.27	5.49	4.21	4.51	-2.90554
chr13	28208285	28208785	intron (NM_152705, intron 1 of 2)	intron (NM_152705, intron 1 of 2)	12619	NM_015972	51082	Hs.507584	NM_015972	ENSG00000186184	POLR1D	AC19|POLR1C|RPA16|RPA9|RPAC2|RPC16|RPO1-3|TCS2	RNA polymerase I subunit D	protein-coding	15.41	23.3	6.42	3.01	3.02	0.92	1.04	-2.99858
chr11	94427538	94428038	intron (NR_135094, intron 1 of 3)	intron (NR_135094, intron 1 of 3)	45733	NR_135093	105369438	Hs.568921	NR_135093	ENSG00000255929	LOC105369438	-	uncharacterized LOC105369438	ncRNA	8.62	16.83	4.64	0.32	3.84	2.56	1.91	-2.39511
chr6	137426549	137427049	Intergenic	MLT1J1-int|LTR|ERVL-MaLR	-60482	NM_014432	53832	Hs.445868	NM_014432	ENSG00000016402	IL20RA	CRF2-8|IL-20R-alpha|IL-20R1|IL-20RA	interleukin 20 receptor subunit alpha	protein-coding	13.02	30.25	5.23	3.64	3.29	1.83	2.78	-2.41949
chr16	70595478	70595978	intron (NM_012426, intron 17 of 25)	intron (NM_012426, intron 17 of 25)	-18070	NM_001172771	146433	Hs.461214	NM_152456	ENSG00000157368	IL34	C16orf77|IL-34	interleukin 34	protein-coding	6.79	15.21	3.16	1.42	1.65	1.28	0.52	-2.68704
chr13	91348886	91349386	Intergenic	Intergenic	203594	NR_120414	101927224	Hs.385801	NR_120414		LINC01049	-	long intergenic non-protein coding RNA 1049	ncRNA	1.83	1.29	1.28	9.34	10.98	7.14	7.63	2.35835
chr2	12078280	12078780	Intergenic	Intergenic	-68712	NR_110197	100506457	Hs.197824	NR_110196	ENSG00000224184	MIR3681HG	-	MIR3681 host gene	ncRNA	11.92	26.7	7.01	5.38	1.65	2.01	2.08	-2.51598
chr2	161076912	161077412	Intergenic	LTR50|LTR|ERVL	-20338	NM_001282388	3694	Hs.470399	NM_000888	ENSG00000115221	ITGB6	AI1H	integrin subunit beta 6	protein-coding	17.98	40.77	6.52	2.69	1.92	5.49	2.78	-2.64263
chr7	122831045	122831748	intron (NM_001324400, intron 1 of 17)	intron (NM_001324400, intron 1 of 17)	8628	NM_001324400	6561	Hs.489849	NM_022444	ENSG00000081800	SLC13A1	NAS1|NaSi-1	solute carrier family 13 member 1	protein-coding	2.38	2.59	2.67	17.09	12.35	10.99	15.44	2.67616
chr20	20584019	20584519	intron (NM_020343, intron 15 of 39)	MLT1H|LTR|ERVL-MaLR	108997	NM_020343	57186	Hs.472285	NM_020343	ENSG00000188559	RALGAPA2	AS250|C20orf74|bA287B20.1|dJ1049G11|dJ1049G11.4|p220	Ral GTPase activating protein catalytic alpha subunit 2	protein-coding	12.11	18.61	8.39	4.27	1.92	1.83	1.91	-2.77978
chr6	49635927	49636427	Intergenic	Intergenic	-31590	NM_000324	6005	Hs.120950	NM_000324	ENSG00000112077	RHAG	CD241|OHS|OHST|RH2|RH50A|Rh50|Rh50GP|SLC42A1	Rh-associated glycoprotein	protein-coding	1.47	1.29	1.28	17.25	3.84	7.51	11.8	3.20782
chr9	31045771	31046271	Intergenic	Intergenic	335467	NR_135134	101929620	Hs.547175	NR_135134	ENSG00000260720	LINC01243	-	long intergenic non-protein coding RNA 1243	ncRNA	1.65	1.29	1.38	23.11	10.43	7.14	8.5	2.9668
chr1	193228713	193229213	Intergenic	L2a|LINE|L2	-44912	NR_125789	101929184	Hs.146728	NR_125789	ENSG00000232077	LINC01031	TCONS_00000361	long intergenic non-protein coding RNA 1031	ncRNA	0.92	1.29	1.38	13.77	15.09	6.41	23.6	3.93438
chr4	48670606	48671106	intron (NM_015030, intron 3 of 63)	intron (NM_015030, intron 3 of 63)	111460	NM_015030	285527	Hs.595553	NM_015030	ENSG00000075539	FRYL	AF4p12|KIAA0826|MOR2	FRY like transcription coactivator	protein-coding	1.83	1.46	0.79	3.64	3.57	7.69	11.45	2.57241
chr18	60087833	60088524	Intergenic	L3|LINE|CR1	95659	NM_001270949	8792	Hs.204044	NM_003839	ENSG00000141655	TNFRSF11A	CD265|FEO|LOH18CR1|ODFR|OFE|OPTB7|OSTS|PDB2|RANK|TRANCER	TNF receptor superfamily member 11a	protein-coding	5.14	11.33	4.74	24.85	22.5	15.75	27.59	2.3439
chr3	170048846	170049346	Intergenic	Intergenic	-26377	NM_001145098	6498	Hs.536655	NM_005414	ENSG00000136603	SKIL	SNO|SnoA|SnoI|SnoN	SKI like proto-oncogene	protein-coding	5.14	1.46	1.98	15.51	11.8	12.45	18.74	2.39206
chr12	63476789	63477289	Intergenic	Intergenic	69551	NM_000706	552	Hs.2131	NM_000706	ENSG00000166148	AVPR1A	AVPR V1a|AVPR1|V1aR	arginine vasopressin receptor 1A	protein-coding	1.65	0.16	1.28	13.14	6.59	11.72	11.45	3.4631
chr11	27209482	27209982	intron (NR_125766, intron 2 of 4)	L2a|LINE|L2	30583	NR_125768	103695435	Hs.196133	NR_125766	ENSG00000254560	BBOX1-AS1	-	BBOX1 antisense RNA 1	ncRNA	1.1	1.46	2.47	9.02	12.08	5.68	9.37	2.33025
chr13	110228531	110229177	Intergenic	Intergenic	-151767	NR_103846	101409253	Hs.578072	NR_103846	ENSG00000234854	LINC00676	-	long intergenic non-protein coding RNA 676	ncRNA	2.75	5.5	3.56	37.35	17.29	17.21	33.66	3.23014
chr13	103552409	103552909	Intergenic	Intergenic	20210	NR_026965	121952	Hs.660773	NR_026965	ENSG00000250878	METTL21EP	METTL21CP1	methyltransferase like 21E, pseudogene	pseudo	1.47	1.94	0.89	15.04	12.9	12.63	8.85	3.42625
chr8	119560692	119561493	intron (NM_001101676, intron 2 of 4)	L1PA3|LINE|L1	-72147	NR_038210	552860	Hs.571527	NR_038210	ENSG00000281641	SAMD12-AS1	C8orf26|NCRNA00252	SAMD12 antisense RNA 1	ncRNA	3.3	2.59	3.95	10.6	24.43	16.85	17.7	2.43136
chr15	101714362	101714862	Intergenic	Intergenic	77525	NM_014918	22856	Hs.110488	NM_014918	ENSG00000131873	CHSY1	CHSY|CSS1|ChSy-1|TPBS	chondroitin sulfate synthase 1	protein-coding	16.51	23.3	6.81	2.69	4.39	3.66	1.39	-2.34485
chr6	64206089	64206589	Intergenic	Intergenic	-75578	NM_003463	7803	Hs.227777	NM_003463	ENSG00000112245	PTP4A1	HH72|PRL-1|PRL1|PTP(CAAX1)|PTPCAAX1	protein tyrosine phosphatase type IVA, member 1	protein-coding	2.93	1.46	0.89	10.45	15.37	6.96	12.49	2.74276
chr2	167041277	167041777	intron (NR_110260, intron 3 of 11)	L2a|LINE|L2	-35885	NM_001202435	6323	Hs.22654	NM_006920	ENSG00000144285	SCN1A	EIEE6|FEB3|FEB3A|FHM3|GEFSP2|HBSCI|NAC1|Nav1.1|SCN1|SMEI	sodium voltage-gated channel alpha subunit 1	protein-coding	7.34	16.02	5.23	2.22	1.1	2.2	1.56	-2.72583
chr16	52598766	52599266	intron (NR_033920, intron 2 of 3)	intron (NR_033920, intron 2 of 3)	-17302	NM_001146188	27324	Hs.132574	NM_001080430	ENSG00000103460	TOX3	CAGF9|TNRC9	TOX high mobility group box family member 3	protein-coding	1.1	1.13	2.37	10.45	6.59	6.23	16.31	2.71315
chr6	91545267	91545767	Intergenic	MIR|SINE|MIR	-248497	NM_003188	6885	Hs.594838	NM_003188	ENSG00000135341	MAP3K7	CSCF|FMD2|MEKK7|TAK1|TGF1a	mitogen-activated protein kinase kinase kinase 7	protein-coding	1.1	0.97	2.07	11.71	8.78	11.35	5.38	2.36972
chr17	67729738	67730238	intron (NR_109972, intron 3 of 4)	intron (NR_109972, intron 3 of 4)	139860	NR_109972	101928122	Hs.579342	NR_109971	ENSG00000227517	LINC01483	-	long intergenic non-protein coding RNA 1483	ncRNA	13.57	34.95	7.11	3.96	2.2	4.03	3.12	-2.61756
chr9	111365341	111365841	Intergenic	Intergenic	252684	NM_006686	10880	Hs.534390	NM_006686	ENSG00000148156	ACTL7B	Tact1	actin like 7B	protein-coding	15.41	36.89	8	3.96	4.39	4.21	3.64	-2.36996
chr2	230024740	230025448	intron (NM_001100818, intron 1 of 2)	MIRc|SINE|MIR	71714	NM_001330156	55022	Hs.745038	NM_017933	ENSG00000153823	PID1	HMFN2073|NYGGF4|P-CLI1|PCLI1	phosphotyrosine interaction domain containing 1	protein-coding	2.02	2.75	4.74	26.59	25.8	17.03	19.26	3.23866
chr6	157814156	157814656	intron (NM_153746, intron 1 of 8)	intron (NM_153746, intron 1 of 8)	11849	NM_024630	79683	Hs.596214	NM_024630	ENSG00000175048	ZDHHC14	NEW1CP	zinc finger DHHC-type containing 14	protein-coding	0.92	1.62	1.98	6.49	8.23	9.34	9.37	2.64491
chr7	142607267	142607767	intron (NM_019841, intron 13 of 14)	L3|LINE|CR1	23303	NM_019841	56302	Hs.283369	NM_019841	ENSG00000127412	TRPV5	CAT2|ECAC1|OTRPC3	transient receptor potential cation channel subfamily V member 5	protein-coding	3.3	4.85	1.78	16.94	17.02	9.15	15.44	2.33727
chr15	56210074	56210574	promoter-TSS (NM_001284338)	promoter-TSS (NM_001284338)	-995	NM_001284338	4734	Hs.1565	NM_006154	ENSG00000069869	NEDD4	NEDD4-1|RPF1	neural precursor cell expressed, developmentally down-regulated 4, E3 ubiquitin protein ligase	protein-coding	1.28	0.97	1.48	18.2	10.43	8.97	10.41	3.08584
chr3	48636406	48637039	intron (NM_003365, intron 12 of 12)	intron (NM_003365, intron 12 of 12)	-4130	NM_000094	1294	Hs.476218	NM_000094	ENSG00000114270	COL7A1	EBD1|EBDCT|EBR1|NDNC8	collagen type VII alpha 1 chain	protein-coding	31.37	77.33	9.38	3.48	7.14	5.49	8.33	-2.38484
chr13	30141580	30142080	intron (NM_003045, intron 1 of 12)	intron (NM_003045, intron 1 of 12)	27995	NM_003045	6541	Hs.14846	NM_003045	ENSG00000139514	SLC7A1	ATRC1|CAT-1|ERR|HCAT1|REC1L	solute carrier family 7 member 1	protein-coding	20.73	46.43	8.2	3.32	3.57	3.66	4.34	-2.61592
chr13	71730624	71731124	intron (NR_047699, intron 2 of 3)	intron (NR_047699, intron 2 of 3)	141601	NR_047699	100885781	Hs.372660	NR_047699	ENSG00000226846	LINC00348	-	long intergenic non-protein coding RNA 348	ncRNA	1.28	1.29	3.95	15.04	13.45	12.45	8.33	2.38064
chr12	93708245	93708745	intron (NR_040096, intron 2 of 4)	intron (NR_040096, intron 2 of 4)	63017	NR_040096	643339	Hs.741299	NR_040096		LOC643339	-	uncharacterized LOC643339	ncRNA	3.85	3.4	2.86	19.31	20.58	20.69	25.16	2.6342
chr15	80872370	80872870	promoter-TSS (NR_049837)	promoter-TSS (NR_049837)	-824	NR_049837	100847042		NR_049837	ENSG00000172379	MIR5572	-	microRNA 5572	ncRNA	15.04	39.15	9.48	2.53	3.29	4.94	3.3	-2.73399
chr8	120983999	120984499	intron (NM_022783, intron 4 of 8)	MER68B|LTR|ERVL	98354	NM_022783	64798	Hs.112981	NM_022783	ENSG00000155792	DEPTOR	DEP.6|DEPDC6	DEP domain containing MTOR interacting protein	protein-coding	2.57	1.13	2.47	15.51	16.47	8.97	10.06	2.49126
chr1	80211550	80212050	Intergenic	Tigger1|DNA|TcMar-Tigger	-739305	NM_022159	64123	Hs.132314	NM_022159	ENSG00000162618	ADGRL4	ELTD1|ETL|KPG_003	adhesion G protein-coupled receptor L4	protein-coding	0.37	0.65	1.48	20.1	11.8	6.77	13.36	4.14725
chr11	66453795	66454610	intron (NM_006946, intron 35 of 36)	intron (NM_006946, intron 35 of 36)	-8811	NM_001286135	83759	Hs.618713	NM_031492	ENSG00000173914	RBM4B	RBM30|RBM4L|ZCCHC15|ZCCHC21B|ZCRB3B	RNA binding motif protein 4B	protein-coding	36.5	101.12	12.94	2.22	4.67	8.61	6.77	-2.95808

## Sheet: S6C DAR Promoter
Chr	Start	End	Annotation	Detailed Annotation	Distance to TSS	Nearest PromoterID	Entrez ID	Nearest Unigene	Nearest Refseq	Nearest Ensembl	Gene Name	Gene Alias	Gene Description	Gene Type	N_003	N_005	N_006	B_001	B_002	B_003	B_004	Log2(Barrett's/Normal)
chr6	51952160	51952660	promoter-TSS (NM_138694)	promoter-TSS (NM_138694)	13	NM_170724	5314	Hs.662050	NM_138694	ENSG00000170927	PKHD1	ARPKD|FCYT|TIGM1	polycystic kidney and hepatic disease 1 (autosomal recessive)	protein-coding	2.02	2.59	1.68	11.08	11.53	9.52	9.54	2.52413
chr1	110230119	110230619	promoter-TSS (NM_000561)	promoter-TSS (NM_000561)	-49	NM_146421	2944	Hs.301961	NM_000561	ENSG00000134184	GSTM1	GST1|GSTM1-1|GSTM1a-1a|GSTM1b-1b|GTH4|GTM1|H-B|MU|MU-1	glutathione S-transferase mu 1	protein-coding	0	34.3	0	0	0	0	0	inf
chr5	180325733	180326233	promoter-TSS (NM_001159709)	promoter-TSS (NM_001159709)	-94	NM_001159709	79908	Hs.189109	NM_024850	ENSG00000113303	BTNL8	BTN9.2	butyrophilin like 8	protein-coding	2.2	3.4	2.77	11.08	9.61	15.01	9.72	2.48481
chr10	118380150	118380650	promoter-TSS (NM_005396)	promoter-TSS (NM_005396)	-65	NR_103727	5408	Hs.423598	NM_005396	ENSG00000266200	PNLIPRP2	PLRP2	pancreatic lipase related protein 2 (gene/pseudogene)	protein-coding	2.38	5.99	3.65	21.37	20.58	12.45	6.42	2.33105
chr4	106473409	106473909	promoter-TSS (NM_017700)	promoter-TSS (NM_017700)	-118	NM_017700	54848	Hs.585224	NM_017700	ENSG00000236699	ARHGEF38	-	Rho guanine nucleotide exchange factor 38	protein-coding	9.17	16.02	6.32	50.33	51.6	42.11	39.9	2.50361
chr6	82956784	82958546	promoter-TSS (NM_001300906)	promoter-TSS (NM_001300906)	-194	NM_001300906	25998	Hs.306425	NM_015525	ENSG00000005700	IBTK	BTBD26|BTKI	inhibitor of Bruton tyrosine kinase	protein-coding	39.62	70.54	37.73	82.78	85.63	50.9	86.57	2.48822
chr1	27240555	27241055	promoter-TSS (NM_021969)	promoter-TSS (NM_021969)	-238	NM_021969	8431	Hs.427055	NM_021969	ENSG00000131910	NR0B2	SHP|SHP1	nuclear receptor subfamily 0 group B member 2	protein-coding	4.04	4.04	3.36	27.7	24.43	22.16	37.65	2.96932
chr1	64013152	64013652	intron (NM_032437, intron 7 of 13)	MLT1H|LTR|ERVL-MaLR	-1249	NR_002771	79469	Hs.659291	NR_002771		DLEU2L	BCMSUNL	deleted in lymphocytic leukemia 2-like	pseudo	8.07	20.06	5.53	1.27	1.65	2.01	3.12	-2.38061
chr20	42983740	42984525	promoter-TSS (NM_001030004)	promoter-TSS (NM_001030004)	-308	NM_001287184	3172	Hs.116462	NM_000457	ENSG00000101076	HNF4A	FRTS4|HNF4|HNF4a7|HNF4a8|HNF4a9|HNF4alpha|MODY|MODY1|NR2A1|NR2A21|TCF|TCF14	hepatocyte nuclear factor 4 alpha	protein-coding	4.95	9.71	5.53	17.73	18.66	22.89	27.59	2.59346
chr4	169013386	169013886	promoter-TSS (NM_007193)	promoter-TSS (NM_007193)	-52	NM_007193	11199	Hs.188401	NM_007193	ENSG00000109511	ANXA10	ANX14	annexin A10	protein-coding	0.73	0.97	1.68	26.43	20.58	9.89	19.95	3.97176
chr3	108015036	108015536	promoter-TSS (NM_001282556)	promoter-TSS (NM_001282556)	-51	NM_001282556	11148	Hs.225968	NM_007072	ENSG00000114455	HHLA2	B7-H5|B7-H7|B7H7|B7y	HERV-H LTR-associating 2	protein-coding	3.85	2.59	1.38	13.14	9.88	10.99	12.14	2.38088
chr10	118349340	118349840	promoter-TSS (NM_006229)	promoter-TSS (NM_006229)	-881	NM_006229	5407	Hs.73923	NM_006229	ENSG00000187021	PNLIPRP1	PLRP1	pancreatic lipase related protein 1	protein-coding	2.02	2.59	1.98	18.04	16.19	17.21	6.94	2.76802
chr7	39605116	39605616	promoter-TSS (NM_020192)	promoter-TSS (NM_020192)	-609	NM_020192	57002	Hs.72168	NM_020192	ENSG00000241127	YAE1D1	C7orf36|GK003	Yae1 domain containing 1	protein-coding	1.83	1.29	3.26	11.87	17.02	12.45	13.19	2.52984
chr19	39303489	39303989	promoter-TSS (NM_006149)	promoter-TSS (NM_006149)	1	NM_006149	3960	Hs.5302	NM_006149	ENSG00000171747	LGALS4	GAL4|L36LBP	galectin 4	protein-coding	6.42	7.6	3.06	18.2	21.96	17.03	24.29	2.35938
chr14	94382832	94383332	intron (NR_027004, intron 6 of 10)	MER51A|LTR|ERV1	-2158	NM_138344	90050	Hs.525550	NM_138344	ENSG00000140067	FAM181A	C14orf152	family with sequence similarity 181 member A	protein-coding	3.49	4.53	2.37	23.74	17.84	5.68	18.39	2.52905
chr12	7819141	7819641	promoter-TSS (NM_005889)	promoter-TSS (NM_005889)	-892	NM_001644	339	Hs.560	NM_001644	ENSG00000111701	APOBEC1	APOBEC-1|BEDP|CDAR1|HEPR	apolipoprotein B mRNA editing enzyme catalytic subunit 1	protein-coding	2.38	2.27	0.69	8.86	12.62	8.24	6.94	3.26966
chr7	23275476	23275976	Intergenic	Intergenic	-10590	NM_002510	10457	Hs.190495	NM_002510	ENSG00000136235	GPNMB	HGFIN|NMB	glycoprotein nmb	protein-coding	16.69	33.17	5.93	1.74	2.74	2.75	3.47	-2.61779
chr12	8974843	8975343	promoter-TSS (NM_144670)	promoter-TSS (NM_144670)	25	NM_144670	144568	Hs.620532	NM_144670	ENSG00000166535	A2ML1	CPAMD9|p170	alpha-2-macroglobulin like 1	protein-coding	15.04	25.56	3.56	3.17	0.82	1.83	2.95	-2.48311
chr19	51978392	51978892	Intergenic	Intergenic	-3255	NM_001278392	729767	Hs.653111	NM_001080405	ENSG00000213822	CEACAM18	-	carcinoembryonic antigen related cell adhesion molecule 18	protein-coding	2.02	1.13	1.88	8.71	11.53	9.52	16.66	2.88933
chr5	110072360	110072860	Intergenic	L2a|LINE|L2	-1227	NM_001303250	91137	Hs.75639	NM_138773	ENSG00000164209	SLC25A46	HMSN6B	solute carrier family 25 member 46	protein-coding	2.2	0.97	0.99	16.46	15.37	8.24	15.61	3.33939
chr6	73974096	73974596	intron (NM_001251874, intron 2 of 4)	intron (NM_001251874, intron 2 of 4)	-1427	NM_030568	80759	Hs.433062	NM_030568	ENSG00000135314	KHDC1	C6orf147|C6orf148|Em:AC019205.8|NDG1|bA257K9.4	KH homology domain containing 1	protein-coding	17.98	58.89	10.67	5.22	4.94	4.21	3.47	-2.33149
chr16	56641153	56641653	Intergenic	Intergenic	-1075	NM_005953	4502	Hs.534330	NM_005953	ENSG00000125148	MT2A	MT2	metallothionein 2A	protein-coding	10.09	42.39	11.95	3.32	0.27	1.65	4.86	-2.64533
chr4	47486098	47486598	Intergenic	Intergenic	-1062	NM_020453	57205	Hs.437241	NM_020453	ENSG00000145246	ATP10D	ATPVD	ATPase phospholipid transporting 10D (putative)	protein-coding	18.89	35.27	5.53	2.85	5.21	2.56	1.39	-2.44885
chr3	120400864	120401364	5' UTR (NM_000187, exon 1 of 14)	5' UTR (NM_000187, exon 1 of 14)	304	NM_000187	3081	Hs.368254	NM_000187	ENSG00000113924	HGD	AKU|HGO	homogentisate 1,2-dioxygenase	protein-coding	1.47	1.78	2.57	10.76	8.51	10.44	13.01	2.3722
chr7	87856248	87856748	promoter-TSS (NM_001256892)	promoter-TSS (NM_001256892)	-190	NM_198901	6717	Hs.489040	NM_003130	ENSG00000075142	SRI	CP-22|CP22|SCN|V19	sorcin	protein-coding	3.67	3.88	1.78	38.78	30.19	22.16	30.54	3.786
chr14	21523748	21524248	intron (NM_001282211, intron 1 of 14)	intron (NM_001282211, intron 1 of 14)	-1983	NM_138331	122665	Hs.553572	NM_138331	ENSG00000173431	RNASE8	RAE2	ribonuclease A family member 8	protein-coding	3.3	2.59	2.86	15.2	12.62	10.8	11.97	2.33613
chr16	21244712	21245212	promoter-TSS (NM_145865)	promoter-TSS (NM_145865)	-54	NM_145865	257629	Hs.115959	NM_145865	ENSG00000175311	ANKS4B	HARP	ankyrin repeat and sterile alpha motif domain containing 4B	protein-coding	1.65	1.62	1.28	7.76	5.49	8.24	7.29	2.59034
chr3	137717215	137717715	promoter-TSS (NM_001002026)	promoter-TSS (NM_001002026)	-193	NM_001002026	51208	Hs.655324	NM_016369	ENSG00000066405	CLDN18	SFTA5|SFTPJ	claudin 18	protein-coding	2.93	3.56	3.36	50.97	24.15	22.7	38.52	3.56043
chr1	167059577	167060077	promoter-TSS (NM_005814)	promoter-TSS (NM_005814)	41	NM_005814	10223	Hs.651244	NM_005814	ENSG00000143167	GPA33	A33	glycoprotein A33	protein-coding	1.83	2.59	4.35	13.77	31.01	19.41	18.22	2.78882
[truncated: 6 more rows]
