# Supplementary material for: Identification of a primitive intestinal transcription factor network shared between esophageal adenocarcinoma and its precancerous precursor state
Source: Genome Res. 2019 May;29(5):723–36. doi: 10.1101/gr.243345.118 (PMC6499311; doi:10.1101/gr.243345.118)
Supplement: Supplemental Material [file supp_gr.243345.118_Supplemental_Table_S8.xlsx]

## Sheet: Legend
Table S8. Differentially accessible regions in Barrett’s patient samples. (A) Coordinates of the top 50,000 genomic regions showing accessibility across Het1A and Het1A-HNF4A cells treated with doxycycline for 2 days. (B and C) Coordinates of regions showing >5 fold increase (B) or decrease (C) in accessibility when comparing the signal in Het1A compared to Het1A-HNF4A cells. (D) Coordinates of t…

## Sheet: S8A HNF4A Top 50,000 regions
Chr	Start	End
chr20	62313738	62314238
chr15	98503427	98503927
chr15	89631218	89631718
chr15	89877872	89878372
chr1	143913202	143913702
chr15	89631008	89631508
chr5	159546389	159546889
chr7	30544379	30544879
chr5	145562030	145562530
chr1	44115453	44115953
chr3	131100338	131100838
chr15	85259152	85259652
chr15	85259465	85259965
chr5	145582822	145583322
chr15	93447263	93447763
chr10	76585781	76586281
chr5	178986375	178986875
chr7	30323794	30324294
chr15	77223745	77224245
chr10	76585987	76586487
chr14	64108514	64109014
chr20	44622045	44622545
chr7	134331227	134331727
chr15	101142485	101142985
chr15	59063151	59063651
chr5	168006515	168007015
chr14	78083022	78083522
chr20	45317974	45318474
chr19	42772869	42773369
chr6	158185528	158186028
chr15	63400129	63400629
chr15	65903359	65903859
chr1	85742078	85742578
chr20	52740064	52740564
chr3	11641919	11642419
chr8	67579313	67579813
chr11	73881952	73882452
chr6	155635609	155636109
chr5	179125566	179126066
chr7	157102674	157103174
chr1	20987835	20988335
chr14	51561694	51562194
chr14	102438684	102439184
chr14	102414393	102414893
chr15	85455430	85455930
chr15	75932392	75932892
chr15	85923427	85923927
chr5	137667368	137667868
chr5	151151081	151151581
chr5	151150782	151151282
chr14	105957254	105957754
chr1	24743430	24743930
chr5	176853122	176853622
chr14	74551065	74551565
chr6	151773166	151773666
chr8	110346225	110346725
chr14	53019108	53019608
chr14	74416733	74417233
chr14	66974486	66974986
chr16	67840388	67840888
chr5	139780511	139781011
chr1	16939852	16940352
chr5	179159504	179160004
chr3	43663478	43663978
chr7	102389023	102389523
chr20	49039624	49040124
chr15	89181844	89182344
chr15	93425481	93425981
chr20	30181059	30181559
chr20	39958097	39958597
chr3	33481782	33482282
chr14	54976217	54976717
chr14	73392820	73393320
chr14	36295271	36295771
chr15	91260257	91260757
chr14	100659141	100659641
chrX	15353604	15354104
chr6	160183156	160183656
chr20	45962764	45963264
chr5	157158506	157159006
chr14	73493617	73494117
chr15	90708922	90709422
chr15	67546753	67547253
chr15	81616422	81616922
chr7	155744410	155744910
chr6	159274503	159275003
chr20	43321591	43322091
chr5	175815789	175816289
chr14	104181596	104182096
chr14	96000993	96001493
chr17	73285332	73285832
chr8	74884314	74884814
chr1	33564841	33565341
chr2	65357091	65357591
chr14	95731654	95732154
chr14	65453616	65454116
chr17	73900898	73901398
chr20	43321433	43321933
chr5	150632341	150632841
chr17	80416222	80416722
chr2	64978001	64978501
chr7	7680016	7680516
chr5	122758898	122759398
chr14	102990884	102991384
chr20	49262061	49262561
chr5	74632583	74633083
chr17	16931413	16931913
chr14	73925114	73925614
chr14	59655053	59655553
chr14	20929653	20930153
chr15	59041954	59042454
chr15	59664864	59665364
chr17	8534041	8534541
chr19	55850578	55851078
chr5	132201996	132202496
chr17	4634766	4635266
chr1	8021376	8021876
chr15	72564849	72565349
chr5	168777642	168778142
chr15	96971823	96972323
chr15	74833105	74833605
chr9	102861171	102861671
chr20	44440911	44441411
chr5	149696726	149697226
chr15	76195963	76196463
chr5	139780966	139781466
chr5	43313585	43314085
chr6	169470567	169471067
chr3	38178505	38179005
chr10	97453548	97454048
chr3	93698650	93699150
chr5	43121376	43121876
chr15	78799514	78800014
chr15	90701097	90701597
chr15	93374911	93375411
chr15	82425009	82425509
chr5	179285669	179286169
chr1	43672433	43672933
chr14	77923800	77924300
chr5	108084371	108084871
chr3	185826755	185827255
chr15	89089688	89090188
chr14	105956848	105957348
chr6	159290771	159291271
chr1	25757006	25757506
chr14	65380829	65381329
chrX	13670951	13671451
chr14	105219087	105219587
chr7	137686626	137687126
chr14	65007088	65007588
chr15	57778022	57778522
chr19	19887087	19887587
chr5	37771730	37772230
chr20	54967199	54967699
chr7	100183766	100184266
chr2	74685186	74685686
chr1	24969341	24969841
chr3	121468399	121468899
chr3	136580694	136581194
chr3	179280433	179280933
chr5	10551458	10551958
chr3	50273166	50273666
chr15	72978268	72978768
chr7	137686834	137687334
chr3	172468219	172468719
chr9	114804006	114804506
chr5	126366067	126366567
chr15	71184612	71185112
chr10	114833488	114833988
chr21	38639554	38640054
chr7	156803237	156803737
chr14	91526829	91527329
chr7	25164809	25165309
chr1	23694698	23695198
chr5	149339991	149340491
chr5	172483951	172484451
chrX	16804137	16804637
chr5	148381551	148382051
chr7	155021873	155022373
chr20	60813180	60813680
chr2	70141541	70142041
chr3	114866325	114866825
chr10	105991927	105992427
chr15	96816921	96817421
chr1	17231162	17231662
chr15	59576042	59576542
chr21	43460548	43461048
chr1	151254347	151254847
chr5	41903992	41904492
chr1	19229140	19229640
chr3	141456831	141457331
chr5	137878861	137879361
chrX	13752594	13753094
chr6	52149535	52150035
chr2	28022088	28022588
chr1	185125982	185126482
chr1	16532948	16533448
chr3	119813618	119814118
chr15	91537701	91538201
chr1	45139961	45140461
chr8	145159037	145159537
chr20	59761205	59761705
chr3	9791391	9791891
chr20	42219310	42219810
chr3	197463622	197464122
chr15	74715271	74715771
chr1	47779668	47780168
chr14	58764725	58765225
chr15	56311513	56312013
chr21	34914979	34915479
chr5	33440689	33441189
chr15	58762015	58762515
chr1	53791768	53792268
chr15	99440170	99440670
chr5	156569671	156570171
chrX	3732851	3733351
chr3	112372312	112372812
chr17	19281439	19281939
chr5	130506388	130506888
chr6	150390084	150390584
chr15	99663773	99664273
chr1	184723866	184724366
chr20	62496224	62496724
chr15	75660087	75660587
chr14	93509702	93510202
chr11	66383739	66384239
chr6	136571207	136571707
chr1	89458457	89458957
chr6	7389723	7390223
chr16	87984402	87984902
chr5	140027038	140027538
chr1	86072786	86073286
chr14	67707623	67708123
chr14	55239992	55240492
chr12	95867558	95868058
chr7	138915634	138916134
chr3	98620397	98620897
chr15	85143900	85144400
chr3	134146189	134146689
chr15	101142288	101142788
chr8	142164164	142164664
chr7	155744092	155744592
chr17	20946455	20946955
chrX	15353452	15353952
chr11	124981439	124981939
chr1	206137900	206138400
chr7	155090507	155091007
chr14	82000143	82000643
chr3	167452659	167453159
chr15	76603578	76604078
chr15	75110895	75111395
chr14	55239815	55240315
chr6	146285323	146285823
chr14	91527065	91527565
chr14	77787090	77787590
chr17	76588384	76588884
chr14	99947380	99947880
chr5	150137971	150138471
chr20	43965223	43965723
chr3	37034431	37034931
chr6	159420666	159421166
chr14	103851376	103851876
chr15	75744089	75744589
chr15	93347043	93347543
chr15	65809892	65810392
chr7	44646183	44646683
chr14	81999998	82000498
chr14	65006831	65007331
chr5	173314923	173315423
chrX	8836439	8836939
chr2	27008527	27009027
chr15	75230157	75230657
chr1	70876540	70877040
chr3	135969212	135969712
chr10	101380303	101380803
chr7	25901832	25902332
chr3	127842485	127842985
chr15	75953333	75953833
chr15	49912902	49913402
chr5	34915442	34915942
chr17	79212690	79213190
chr14	20811230	20811730
chr20	49157336	49157836
chr3	48646890	48647390
chr17	4870478	4870978
chr8	124084584	124085084
chr6	31795030	31795530
chr10	94050612	94051112
chr2	54950346	54950846
chr3	42632040	42632540
chr1	45139609	45140109
chr6	155635420	155635920
chr15	89089550	89090050
chr15	80189133	80189633
chr3	38206353	38206853
chr21	38711224	38711724
chr2	240322734	240323234
chr20	40246902	40247402
chr5	141595354	141595854
chr11	82867646	82868146
chr3	98241543	98242043
chr5	159592534	159593034
chr3	138640545	138641045
chr5	141348435	141348935
chr15	59397042	59397542
chr1	227127568	227128068
chr20	56963985	56964485
chr9	130007289	130007789
chr9	130158944	130159444
chr2	198317946	198318446
chr7	25902021	25902521
chr15	64648152	64648652
chr15	90930995	90931495
chr2	88990872	88991372
chr15	78357711	78358211
chr3	150264270	150264770
chr9	117314195	117314695
chr3	42003418	42003918
chr8	104427156	104427656
chr1	24285919	24286419
chr6	151381263	151381763
chr14	105218792	105219292
chr1	201139717	201140217
chr1	17560207	17560707
chr6	30034516	30035016
chr20	48937786	48938286
chr6	37225240	37225740
chr7	44121982	44122482
chr20	44485853	44486353
chr10	103113569	103114069
chr14	36295761	36296261
chr5	134240171	134240671
chr19	52692791	52693291
chr1	225965218	225965718
chr5	172141713	172142213
chr16	53537256	53537756
chr19	40476701	40477201
chr17	79196634	79197134
chr1	45272862	45273362
chr5	148737236	148737736
chr5	1555449	1555949
chr20	42142783	42143283
chr14	77787494	77787994
chrX	14891186	14891686
chr16	72127423	72127923
chr15	98503598	98504098
chr5	173191337	173191837
chr17	61699224	61699724
chr3	183735534	183736034
chr7	100183913	100184413
chr16	3450859	3451359
chr15	64673514	64674014
chr7	134001536	134002036
chr7	155711638	155712138
chr6	135230168	135230668
chr5	142149622	142150122
chr16	70749052	70749552
chr5	131725265	131725765
chr14	50329443	50329943
chr15	70785003	70785503
chr3	101443183	101443683
chr15	52018511	52019011
chr2	61765295	61765795
chr1	249132248	249132748
chr3	169939939	169940439
chr20	50366678	50367178
chr2	47426164	47426664
chr14	53196608	53197108
chr5	167126393	167126893
chr17	21117295	21117795
chr7	155089167	155089667
chr20	61283446	61283946
chr16	77224503	77225003
chr9	100985446	100985946
chr11	63953279	63953779
chr21	35287947	35288447
chr6	32163321	32163821
chr10	104473951	104474451
chr14	50359441	50359941
chr1	59221021	59221521
chr21	43916301	43916801
chr3	183602463	183602963
chr10	101190407	101190907
chr17	3539432	3539932
chr10	124913592	124914092
chr3	136471240	136471740
chr21	44299411	44299911
chr10	121356456	121356956
chr3	52704770	52705270
chr11	125462317	125462817
chr2	47261112	47261612
chr7	143533553	143534053
chr3	42003624	42004124
chr12	133484882	133485382
chr8	103250956	103251456
chr20	39657039	39657539
chr7	154958337	154958837
chr20	45034735	45035235
chr10	43133469	43133969
chr5	143550051	143550551
chr3	171871024	171871524
chr3	33840315	33840815
chr3	51422286	51422786
chr15	59949531	59950031
chr8	93978121	93978621
chr6	167412486	167412986
chr12	121790046	121790546
chr19	36545062	36545562
chr1	55894846	55895346
chr2	46925955	46926455
chr3	9438482	9438982
chr17	65821269	65821769
chr15	64455238	64455738
chr15	77712421	77712921
chr6	170747415	170747915
chr3	124781922	124782422
chr16	50775617	50776117
chr14	51706640	51707140
chr3	126422689	126423189
chr10	112678832	112679332
chr7	38217518	38218018
chr17	73389846	73390346
chr7	11013117	11013617
chr20	57607311	57607811
chr11	82782671	82783171
chr16	29955253	29955753
chr10	121356318	121356818
chr19	33667855	33668355
chr9	114803866	114804366
chr19	19030128	19030628
chr3	197281515	197282015
chr5	175875105	175875605
chr17	79818376	79818876
chr20	57198876	57199376
chr19	11485434	11485934
chr19	47164494	47164994
chr2	30369254	30369754
chr15	55489011	55489511
chr17	54776757	54777257
chr9	80911724	80912224
chr1	170043609	170044109
chr16	53737589	53738089
chr3	155572229	155572729
chr9	131843055	131843555
chr17	7307236	7307736
chr14	39644061	39644561
chr15	63340377	63340877
chr3	120461189	120461689
chr6	170863094	170863594
chr5	40518460	40518960
chr5	140044131	140044631
chr3	184279228	184279728
chr3	129158857	129159357
chr15	74249072	74249572
chr9	74525952	74526452
chr14	64009920	64010420
chr5	157158140	157158640
chr6	5003706	5004206
chr7	158611105	158611605
chr5	167372559	167373059
chr6	32145739	32146239
chr14	69162056	69162556
chr3	49507406	49507906
chr16	2932519	2933019
chr1	171750304	171750804
chr11	75525922	75526422
chr8	62627061	62627561
chr6	160210637	160211137
chr5	159592048	159592548
chr2	45236526	45237026
chr16	72042355	72042855
chr15	52436061	52436561
chr19	8454903	8455403
chr1	9970384	9970884
chr6	52859885	52860385
chr1	62696377	62696877
chr15	91497809	91498309
chr5	38872266	38872766
chr3	101443497	101443997
chr3	5229053	5229553
chr19	12662170	12662670
chr19	19496274	19496774
chr19	7894486	7894986
chrX	15872723	15873223
chr15	79280760	79281260
chr17	74260956	74261456
chr7	26904032	26904532
chr7	55253871	55254371
chr14	65879054	65879554
chr11	57078739	57079239
chr11	64546043	64546543
chr5	43313363	43313863
chr10	116066275	116066775
chr11	74204066	74204566
chr17	45726706	45727206
chr3	8543125	8543625
chr15	61848164	61848664
chr3	42845815	42846315
chr5	5422140	5422640
chr3	159175833	159176333
chr14	50778734	50779234
chr5	112312138	112312638
chr5	9059960	9060460
chr20	47663058	47663558
chr3	49977180	49977680
chr5	14190397	14190897
chr6	44205128	44205628
chr19	36606000	36606500
chr3	37034657	37035157
chr9	125693664	125694164
chr6	160211141	160211641
chr6	153323618	153324118
chr3	49131447	49131947
chr3	197121429	197121929
chr6	10723009	10723509
chr3	195163539	195164039
chr15	81281932	81282432
chr6	32862243	32862743
chr14	50087207	50087707
chr16	58663729	58664229
chr17	79068630	79069130
chr1	169454994	169455494
chr3	49711137	49711637
chr17	5419320	5419820
chr9	133587883	133588383
chr7	21466831	21467331
chr1	67895926	67896426
chr10	106028569	106029069
chr3	67048409	67048909
chr1	54518866	54519366
chr20	47894796	47895296
chr1	43232645	43233145
chr1	244815904	244816404
chr10	101726061	101726561
chr1	159750424	159750924
chr7	100136517	100137017
chr2	113998430	113998930
chr5	148205728	148206228
chr1	235491395	235491895
chr15	66084504	66085004
chr11	108093438	108093938
chr7	156685809	156686309
chr5	141303127	141303627
chr16	89556902	89557402
chr1	230220248	230220748
chr2	62932532	62933032
chr15	70787116	70787616
chr2	64978231	64978731
chr1	28764337	28764837
chr7	158807996	158808496
chr20	42584018	42584518
chr3	139108379	139108879
chr9	139685488	139685988
chr20	49976892	49977392
chr1	150601898	150602398
chr15	75315648	75316148
chr20	55787504	55788004
chr16	46917903	46918403
chr10	70660692	70661192
chr15	63481329	63481829
chr6	42531436	42531936
chr1	93250488	93250988
chr8	97273570	97274070
chrY	21728880	21729380
chr12	133484979	133485479
chr9	130323942	130324442
chr1	150601491	150601991
chr5	176874859	176875359
chr2	88927070	88927570
chr20	55362669	55363169
chr7	101526040	101526540
chr7	45026026	45026526
chr2	74756656	74757156
chr17	72869120	72869620
chr5	140070753	140071253
chr6	163148597	163149097
chr1	223888548	223889048
chrX	9530867	9531367
chr17	26662477	26662977
chr20	45035055	45035555
chr17	79818502	79819002
chr2	65058303	65058803
chr10	91461019	91461519
chr14	81407924	81408424
chr5	169998404	169998904
chr8	67036031	67036531
chr5	7868990	7869490
chr14	64805308	64805808
chr6	33422005	33422505
chr20	47894477	47894977
chr12	2921492	2921992
chr17	12921163	12921663
chr1	26632938	26633438
chr10	93392774	93393274
chr3	167813570	167814070
chr5	271315	271815
chr8	93977646	93978146
chr15	99270717	99271217
chr17	8338984	8339484
chr19	42579909	42580409
chr7	6116680	6117180
chr10	99205604	99206104
chr5	86708502	86709002
chr14	75469283	75469783
chr14	53196449	53196949
chr20	47804807	47805307
chr14	96968463	96968963
chr15	80215911	80216411
chr20	60877638	60878138
chr17	73975387	73975887
chr14	74959865	74960365
chr12	109232108	109232608
chr14	71276287	71276787
chr10	95506525	95507025
chr16	56485112	56485612
chr17	19281209	19281709
chr1	25071590	25072090
chr9	140506580	140507080
chr16	1832639	1833139
chr11	59383154	59383654
chr3	128399379	128399879
chr17	79633454	79633954
chr15	64679688	64680188
chr17	73120376	73120876
chr15	71087608	71088108
chr17	61850896	61851396
chr12	133706711	133707211
chr1	247241903	247242403
chr3	142695337	142695837
chr9	131397509	131398009
chr16	75339153	75339653
chr15	93425759	93426259
chr15	65133393	65133893
chr8	67525461	67525961
chr1	201924295	201924795
chr8	67340834	67341334
chr16	56279854	56280354
chr10	99400165	99400665
chr10	88159570	88160070
chr15	52471377	52471877
chr20	42142665	42143165
chrX	8700038	8700538
chr2	101179083	101179583
chr6	32806371	32806871
chr12	113658935	113659435
chr10	131909215	131909715
chr3	182817172	182817672
chr7	139025070	139025570
chr1	40506038	40506538
chr3	114865941	114866441
chr14	96571033	96571533
chr14	45366121	45366621
chr20	49126511	49127011
chr10	43932008	43932508
chr9	104160709	104161209
chr5	130970860	130971360
chr5	32852520	32853020
chr8	120885699	120886199
chr7	47826134	47826634
chr15	56199876	56200376
chr1	25010072	25010572
chr9	123605071	123605571
chr9	134000605	134001105
chr21	32931269	32931769
chr6	153304150	153304650
chr15	83418966	83419466
chr3	100120055	100120555
chr1	67390370	67390870
chr7	44163020	44163520
chr7	102004030	102004530
chr17	57232616	57233116
chr5	135393982	135394482
chr2	97481688	97482188
chr7	155411830	155412330
chr2	136499001	136499501
chr1	111506362	111506862
chr15	93352281	93352781
chr1	149223615	149224115
chr10	47057702	47058202
chr6	150038645	150039145
chr2	171785321	171785821
chr8	126010313	126010813
chr7	27702412	27702912
chr6	31707404	31707904
chr6	166970250	166970750
chr14	45431025	45431525
chr17	1619580	1620080
chr10	105156129	105156629
chr15	55582259	55582759
chr1	24592931	24593431
chr11	73309040	73309540
chr5	118604083	118604583
chr5	134073926	134074426
chr12	2921827	2922327
chr5	38845712	38846212
chr15	64385873	64386373
chr1	202310934	202311434
chr10	73526513	73527013
chr1	46598487	46598987
chr7	33102536	33103036
chr1	39325247	39325747
chr1	43672686	43673186
chr6	20401684	20402184
chr5	171433732	171434232
chr15	101253604	101254104
chr14	65569065	65569565
chr11	64808313	64808813
chr10	126812202	126812702
chr5	162864194	162864694
chr19	10828380	10828880
chr9	127962518	127963018
chr7	23053527	23054027
chr7	12726070	12726570
chr8	66546227	66546727
chr7	134464038	134464538
chr19	5904215	5904715
chr12	115371208	115371708
chr12	1799837	1800337
chr14	76127115	76127615
chr5	131132655	131133155
chr17	74667649	74668149
chr14	50052986	50053486
chr6	42951846	42952346
chr7	44887462	44887962
chr1	152020346	152020846
chr11	62521449	62521949
chr7	55200379	55200879
chr15	56285596	56286096
chr5	39100913	39101413
chr6	3826115	3826615
chr5	132073050	132073550
chr3	15642935	15643435
chr12	133170467	133170967
chr21	37802178	37802678
chr1	193028349	193028849
chr8	95487128	95487628
chr2	61991282	61991782
chr1	246729410	246729910
chr15	84401929	84402429
chr8	92082251	92082751
chr6	146864552	146865052
chr19	6424759	6425259
chrY	22737259	22737759
chr12	117175772	117176272
chr9	100818540	100819040
chr6	151711395	151711895
chr17	18086523	18087023
chr1	45956814	45957314
chr14	64854649	64855149
chr2	74881142	74881642
chr15	68878476	68878976
chr20	58515181	58515681
chr3	51975870	51976370
chr17	73042856	73043356
chr17	57970172	57970672
chr11	77705703	77706203
chr19	506898	507398
chr5	125758876	125759376
chr2	28806750	28807250
chr6	32163142	32163642
chr10	96122504	96123004
chr14	37130771	37131271
chr3	156272780	156273280
chr1	42928627	42929127
chr12	115122015	115122515
chr15	70488820	70489320
chr13	50018115	50018615
chr16	19566610	19567110
chr5	153418198	153418698
chr16	23568726	23569226
chr3	100427975	100428475
chr6	116892221	116892721
chr4	83205970	83206470
chr5	149877078	149877578
chr8	142237936	142238436
chr15	63189164	63189664
chr16	46723271	46723771
chr1	210057951	210058451
chr14	23790117	23790617
chr12	104323674	104324174
chr12	95611228	95611728
chr14	62162002	62162502
chr17	73936985	73937485
chr15	59225724	59226224
chr5	9046736	9047236
chr1	36614986	36615486
chr2	85822537	85823037
chr2	131100142	131100642
chr6	42981582	42982082
chr20	48532074	48532574
chr6	155055083	155055583
chr15	90931249	90931749
chr14	71276222	71276722
chr19	4791358	4791858
chr5	153825150	153825650
chr8	103251410	103251910
chr16	46722981	46723481
chr7	100209510	100210010
chr8	124286761	124287261
chr1	38478011	38478511
chr1	47874943	47875443
chr14	60558424	60558924
chr2	62932282	62932782
chr3	14166216	14166716
chr8	99838083	99838583
chr16	81129831	81130331
chr1	46152568	46153068
chr9	130600632	130601132
chr5	32313067	32313567
chr7	157283128	157283628
chr21	47878373	47878873
chr11	85339245	85339745
chr19	5680391	5680891
chr9	116172428	116172928
chr14	21944981	21945481
chr3	190231491	190231991
chr2	128784755	128785255
chr17	40540330	40540830
chr21	15755304	15755804
chr9	136344036	136344536
chr11	82996841	82997341
chr22	35985377	35985877
chr19	4342548	4343048
chr1	56184518	56185018
chr14	23398501	23399001
chr15	52971357	52971857
chr16	69373343	69373843
chr16	50058802	50059302
chr8	103251190	103251690
chr21	30365091	30365591
chr6	144164188	144164688
chr1	43232559	43233059
chr3	12804734	12805234
chr2	197504075	197504575
chr5	82373018	82373518
chr3	122102734	122103234
chr1	44793464	44793964
chr15	75744323	75744823
chr14	54718696	54719196
chr3	48130256	48130756
chr5	114880248	114880748
chr15	74753346	74753846
chr19	13001523	13002023
chr6	142468141	142468641
chr12	122710397	122710897
chr16	84884738	84885238
chr1	44412084	44412584
chr14	73360701	73361201
chr17	15902812	15903312
chr6	166970356	166970856
chr19	39340888	39341388
chr3	155572014	155572514
chr1	28695945	28696445
chrX	15511208	15511708
chr10	75936242	75936742
chr16	68344609	68345109
chr22	40894457	40894957
chr15	67417855	67418355
chr15	80188828	80189328
chr17	47492065	47492565
chr8	144691641	144692141
chr3	15677550	15678050
chr14	58764927	58765427
chr15	89644973	89645473
chr15	99791246	99791746
chr15	67341743	67342243
chr3	49044516	49045016
chr5	14036084	14036584
chr6	136610890	136611390
chr20	49982582	49983082
chr3	195163684	195164184
chr15	74666558	74667058
chr5	148930883	148931383
chr15	57179154	57179654
chr15	102264442	102264942
chr16	30441258	30441758
chr21	35014327	35014827
chr3	139021032	139021532
chr17	46125295	46125795
chr14	58711311	58711811
chr3	185303644	185304144
chr12	1459384	1459884
chr10	131908868	131909368
chr3	100119726	100120226
chr2	47261336	47261836
chr19	50269614	50270114
chr8	66556667	66557167
chr7	100895473	100895973
chr5	147763236	147763736
chr2	27592981	27593481
chr1	10270209	10270709
chr2	220094162	220094662
chr14	74353203	74353703
chr5	150460420	150460920
chr5	179159348	179159848
chr2	74709911	74710411
chr1	11322428	11322928
chr17	2952093	2952593
chr15	90118277	90118777
chr5	102455671	102456171
chr12	96613487	96613987
chr11	69311914	69312414
chr15	101817469	101817969
chr8	73920737	73921237
chr15	75986642	75987142
chr14	76114648	76115148
chr3	160283217	160283717
chr1	23670736	23671236
chr5	143569519	143570019
chr20	42291937	42292437
chr17	7835158	7835658
chr6	159420990	159421490
chr6	136571376	136571876
chr1	117602563	117603063
chr1	226850411	226850911
chr15	90293834	90294334
chr5	148724696	148725196
chr16	9185119	9185619
chr6	159063195	159063695
chr2	47270647	47271147
chr3	9772767	9773267
chr16	88729351	88729851
chr15	74488498	74488998
chr2	42067840	42068340
chr22	38054270	38054770
chr11	43701874	43702374
chr6	28303168	28303668
chr11	77705614	77706114
chr1	186344290	186344790
chr5	153008444	153008944
chr1	55008063	55008563
chr3	88107924	88108424
chr14	94492409	94492909
chr3	52570321	52570821
chr19	4471603	4472103
chr3	151022808	151023308
chr10	105667924	105668424
chr15	67341997	67342497
chr21	27107104	27107604
chr6	170101988	170102488
chr10	104261756	104262256
chr5	149897136	149897636
chr17	58754898	58755398
chr1	89458148	89458648
chr19	8578496	8578996
chr1	231114456	231114956
chr5	141303458	141303958
chr1	244267594	244268094
chr15	65809420	65809920
chr14	102771313	102771813
chr1	46216120	46216620
chr15	81605444	81605944
chr15	75165171	75165671
chr2	172290338	172290838
chr16	69364303	69364803
chr2	208575981	208576481
chr15	69849570	69850070
chr3	51428283	51428783
chr19	45394009	45394509
chr1	145039699	145040199
chr7	135661959	135662459
chr15	56657355	56657855
chr5	180649995	180650495
chr20	35807177	35807677
chr1	208357631	208358131
chr8	131074155	131074655
chr19	12847734	12848234
chr11	65819404	65819904
chr7	36155112	36155612
chr19	36248641	36249141
chr14	105154113	105154613
chr19	19174403	19174903
chr15	78857551	78858051
chr5	108745614	108746114
chr7	100136344	100136844
chr6	144537311	144537811
chr1	19337391	19337891
chr17	5322798	5323298
chr19	11546061	11546561
chr2	88926836	88927336
chr5	148345357	148345857
chr21	30397066	30397566
chr17	26368402	26368902
chr3	49823799	49824299
chr5	141488035	141488535
chr14	75725635	75726135
chr14	100842382	100842882
chr15	56199996	56200496
chr15	85901137	85901637
chr3	33482114	33482614
chrX	16737502	16738002
chr5	127270372	127270872
chr9	71746538	71747038
chr1	120838414	120838914
chr22	41682108	41682608
chr9	82186402	82186902
chr21	37802308	37802808
chr3	189655271	189655771
chr19	48972223	48972723
chr21	32931574	32932074
chr5	177505155	177505655
chr14	54863392	54863892
chr6	24775295	24775795
chr11	61129466	61129966
chr6	32095885	32096385
chr14	74769449	74769949
chr16	28961848	28962348
chr5	135389206	135389706
chr6	52368620	52369120
chr19	46366245	46366745
chr1	161135938	161136438
chr2	44395389	44395889
chr15	85874191	85874691
chr14	21737679	21738179
chr7	30066177	30066677
chr15	51057380	51057880
chr16	69760198	69760698
chr19	49956539	49957039
chr20	49057228	49057728
chr20	34542096	34542596
chr9	130324136	130324636
chrX	9534244	9534744
chr13	53226611	53227111
chr15	71587626	71588126
chr2	44394988	44395488
chr9	114393331	114393831
chr10	74033379	74033879
chr12	104359417	104359917
chr6	168408111	168408611
chr11	73309387	73309887
chr7	156686041	156686541
chr19	42829332	42829832
chr15	69452653	69453153
chr1	43147741	43148241
chr19	15529649	15530149
chr5	172628795	172629295
chr15	68238221	68238721
chr17	5389535	5390035
chr19	28284611	28285111
chr5	133561827	133562327
chr9	104295808	104296308
chr15	83023518	83024018
chr3	53925854	53926354
chr10	95218436	95218936
chr6	122720389	122720889
chr1	43123732	43124232
chr5	125936345	125936845
chr16	5147928	5148428
chr1	10458750	10459250
chr3	105085291	105085791
chr3	112280989	112281489
chr15	65117723	65118223
chr15	74286787	74287287
chr11	134123123	134123623
chr1	235530435	235530935
chr19	14247331	14247831
chr19	54663382	54663882
chr15	90895217	90895717
chr5	175874877	175875377
chr2	48667556	48668056
chr11	105948053	105948553
chr1	22109490	22109990
chr3	67697738	67698238
chr14	75760642	75761142
chr1	59012211	59012711
chr5	131430346	131430846
chr22	38240171	38240671
chr7	42971633	42972133
chr17	70680054	70680554
chr2	96931652	96932152
chr6	32821633	32822133
chr10	121651935	121652435
chr1	205253795	205254295
chr20	42142420	42142920
chr3	111793751	111794251
chr17	73150492	73150992
chr6	13724364	13724864
chrX	20159824	20160324
chr3	48955938	48956438
chr20	56273183	56273683
chr1	202317508	202318008
chr19	20162840	20163340
chr16	24680687	24681187
chr16	31470514	31471014
chr7	25896543	25897043
chr6	46620387	46620887
chr15	90118433	90118933
chr15	73925668	73926168
chr9	79792126	79792626
chr3	113775185	113775685
chr3	133524356	133524856
chr1	41469282	41469782
chr5	148345290	148345790
chr14	101159407	101159907
chr22	37172238	37172738
chr19	10679567	10680067
chr3	160473105	160473605
chr11	118991990	118992490
chr17	18266603	18267103
chr4	2263768	2264268
chr1	221915307	221915807
chr3	134045623	134046123
chr3	57583137	57583637
chr11	105892864	105893364
chr7	55141553	55142053
chr1	39338902	39339402
chr15	91203682	91204182
chr20	50104380	50104880
chr9	139780593	139781093
chr10	72416240	72416740
chr17	7155132	7155632
chr22	46409343	46409843
chr15	56757135	56757635
chr21	15399392	15399892
chr5	178157480	178157980
chr3	122920421	122920921
chr5	137090181	137090681
chr5	149318486	149318986
chr2	118614017	118614517
chr5	131430148	131430648
chr5	145155591	145156091
chr5	6378428	6378928
chr8	90996195	90996695
chrX	16737320	16737820
chr7	155049850	155050350
chr17	76183044	76183544
chr1	153700125	153700625
chr5	149415999	149416499
chr1	84971712	84972212
chr5	176074206	176074706
chr11	66725723	66726223
chr6	143206372	143206872
chr10	75757372	75757872
chr2	131130007	131130507
chr17	57784724	57785224
chr1	227975593	227976093
chr21	43429856	43430356
chr12	120314930	120315430
chr7	56119074	56119574
chr1	150208363	150208863
chr6	151772983	151773483
chr1	24349144	24349644
chr11	64577913	64578413
chr22	21271315	21271815
chr15	74890538	74891038
chr3	124781732	124782232
chr15	84048241	84048741
chr22	35985253	35985753
chr2	74967709	74968209
chr19	6424898	6425398
chr17	76879200	76879700
chr3	50329680	50330180
chr19	51161295	51161795
chr20	30326716	30327216
chr15	74823614	74824114
chr5	70882838	70883338
chr6	168408355	168408855
chr12	109535579	109536079
chr3	32726463	32726963
chr5	170948291	170948791
chr20	34542293	34542793
chr8	75262413	75262913
chr3	67048262	67048762
chr5	118406543	118407043
chr6	52528875	52529375
chr5	137800549	137801049
chr2	74425442	74425942
chr17	76858063	76858563
chr11	18405222	18405722
chr6	170893534	170894034
chr21	37692109	37692609
chr2	65283162	65283662
chr17	57232730	57233230
chr6	31830546	31831046
chr20	55043336	55043836
chr8	118859781	118860281
chr11	62608877	62609377
chr4	83955978	83956478
chr15	67175734	67176234
chr15	67399164	67399664
chr9	95527039	95527539
chr9	128469281	128469781
chr5	159402387	159402887
chr10	103892447	103892947
chr1	172501725	172502225
chr14	52013879	52014379
chr6	33808168	33808668
chr1	155278254	155278754
chr20	42218998	42219498
chr21	40752056	40752556
chr5	14156622	14157122
chr12	110011165	110011665
chr8	129121151	129121651
chr2	39102838	39103338
chr19	57018864	57019364
chr4	166248427	166248927
chr5	96270804	96271304
chr17	75251461	75251961
chr15	66678947	66679447
chr20	42816024	42816524
chr22	17652243	17652743
chr17	17875818	17876318
chr8	128961785	128962285
chr7	138793972	138794472
chr3	47018025	47018525
chr20	42285957	42286457
chr15	67095426	67095926
chr20	35579896	35580396
chr22	46692401	46692901
chr5	175815421	175815921
chr20	44992435	44992935
chr14	76002163	76002663
chr5	168588115	168588615
chr16	2885802	2886302
chr15	59664616	59665116
chr3	50396819	50397319
chr6	86303422	86303922
chr6	31588007	31588507
chr12	53773363	53773863
chr2	32390570	32391070
chr7	156685624	156686124
chr19	46087521	46088021
chr2	118571855	118572355
chr2	55746510	55747010
chr2	172949845	172950345
chr7	66461543	66462043
chr15	93346856	93347356
chr6	36853411	36853911
chr16	23568500	23569000
chr9	116037675	116038175
chr10	105128207	105128707
chr19	5904397	5904897
chr1	47184690	47185190
chrX	20009097	20009597
chr5	141016240	141016740
chr6	146056156	146056656
chr17	6917792	6918292
chr16	74700603	74701103
chr2	110371411	110371911
chr17	8042133	8042633
chr6	64237448	64237948
chr10	75757553	75758053
chr3	171858297	171858797
chr3	131068741	131069241
chr14	78105015	78105515
chr1	236958276	236958776
chr5	122847468	122847968
chr19	59055238	59055738
chr3	150264119	150264619
chr1	114354802	114355302
chr15	56311205	56311705
chr15	65588188	65588688
chr5	133747405	133747905
chr14	21979330	21979830
chr5	114505456	114505956
chr2	46542514	46543014
chr19	36119541	36120041
chr16	58664171	58664671
chr10	95255983	95256483
chr5	141228218	141228718
chr11	125757212	125757712
chr1	26560317	26560817
chr6	52431696	52432196
chr17	46969704	46970204
chr7	33168895	33169395
chr8	25315865	25316365
chr15	101261877	101262377
chr15	74343686	74344186
chr8	98930590	98931090
chr15	60383337	60383837
chr1	68036040	68036540
chr11	62320811	62321311
chr9	127580877	127581377
chr1	21348687	21349187
chr2	61765612	61766112
chr17	73092096	73092596
chr10	124133905	124134405
chr7	8008073	8008573
chr15	81248046	81248546
chr3	31573756	31574256
chr10	104004856	104005356
chr17	57184132	57184632
chr17	39942894	39943394
chr19	33462791	33463291
chr16	4852719	4853219
chr14	95949469	95949969
chr8	110551614	110552114
chr14	24711651	24712151
chr10	134346218	134346718
chr1	3773675	3774175
chr7	5631041	5631541
chr7	143598844	143599344
chr14	53258006	53258506
chr17	57906556	57907056
chr17	74998162	74998662
chr19	46498263	46498763
chr11	57479633	57480133
chr5	40755792	40756292
chr15	93447500	93448000
chr5	31532048	31532548
chr6	7058595	7059095
chr6	20212517	20213017
chr17	79995371	79995871
chr15	63389219	63389719
chr15	100273478	100273978
chr3	123303695	123304195
chr6	11093728	11094228
chr5	171433431	171433931
chr7	6116792	6117292
chr19	46195542	46196042
chr19	9945618	9946118
chr5	94982272	94982772
chr11	105947871	105948371
chr17	66097561	66098061
chr14	75919680	75920180
chr16	75018813	75019313
chr5	177580670	177581170
chr1	59762329	59762829
chr15	83735876	83736376
chr17	44271184	44271684
chr20	55363274	55363774
chr10	70480600	70481100
chr1	33116484	33116984
chr15	74907791	74908291
chr14	24911694	24912194
chr15	90777024	90777524
chr19	16606904	16607404
chr6	144416569	144417069
chr15	75248901	75249401
chr15	67397591	67398091
chr14	81636539	81637039
chr7	32534813	32535313
chr3	180319684	180320184
chr5	162932300	162932800
chr10	88281342	88281842
chr5	172313921	172314421
chr11	129013147	129013647
chr10	105677733	105678233
chr14	23790347	23790847
chr17	57232353	57232853
chr6	29690839	29691339
chr11	62389308	62389808
chr3	67697858	67698358
chr6	170151438	170151938
chr1	40399920	40400420
chr14	69445905	69446405
chr11	65382721	65383221
chr10	97320956	97321456
chr3	141944179	141944679
chr3	16306369	16306869
chr1	244615035	244615535
chr1	55894603	55895103
chr20	39631923	39632423
chr6	33807720	33808220
chr1	43311992	43312492
chr3	132136091	132136591
chr10	79176135	79176635
chr15	62352496	62352996
chr14	55118879	55119379
chr14	76127370	76127870
chr20	48782535	48783035
chr2	232645795	232646295
chr3	159572461	159572961
chr3	141085900	141086400
chr2	191184452	191184952
chr1	17240201	17240701
chr14	93260180	93260680
chr5	174771356	174771856
chr11	57545847	57546347
chr12	121124484	121124984
chr16	30933791	30934291
chr3	48229761	48230261
chr1	92764306	92764806
chr1	39657733	39658233
chr11	66056466	66056966
chr8	145550380	145550880
chr19	47551724	47552224
chr1	26324450	26324950
chr1	59616648	59617148
chr11	86195151	86195651
chr19	36422344	36422844
chr1	207494606	207495106
chr16	3053737	3054237
chr1	218669872	218670372
chr6	42306302	42306802
chr1	155579619	155580119
chr3	49761261	49761761
chr7	156433063	156433563
chr17	17494911	17495411
chr6	31926593	31927093
chr11	77899506	77900006
chr14	39901892	39902392
chr6	19472350	19472850
chr14	74960071	74960571
chr9	134608972	134609472
chr15	64455054	64455554
chr12	56497952	56498452
chr3	49059209	49059709
chr1	33502307	33502807
chr2	232328997	232329497
chr7	30323994	30324494
chr6	137143440	137143940
chr21	44144288	44144788
chr6	26457882	26458382
chr1	145542666	145543166
chr3	189721342	189721842
chr6	1481508	1482008
chr1	11865766	11866266
chr3	101395852	101396352
chr15	90776425	90776925
chr3	149530712	149531212
chr17	16189202	16189702
chr1	247095010	247095510
chr20	43150498	43150998
chr10	43951078	43951578
chr10	97068367	97068867
chr5	177631178	177631678
chr11	94226863	94227363
chr1	169862868	169863368
chr16	18812701	18813201
chr17	14204011	14204511
chr1	117664191	117664691
chr6	52368983	52369483
chr5	57185331	57185831
chr5	145826346	145826846
chr16	75279279	75279779
chr6	33359285	33359785
chr7	140326029	140326529
chr20	58824421	58824921
chr1	39644119	39644619
chr8	92082105	92082605
chr17	67323014	67323514
chr6	164166869	164167369
chr7	1068395	1068895
chr1	213031294	213031794
chr10	96989433	96989933
chr22	46084612	46085112
chr14	90420977	90421477
chr6	27440607	27441107
chr11	82997193	82997693
chr1	119683101	119683601
chr12	122985295	122985795
chr6	52149381	52149881
chr11	18548246	18548746
chr17	17875640	17876140
chr16	14013618	14014118
chr1	144931901	144932401
chr17	73975057	73975557
chr2	133173888	133174388
chr20	43490147	43490647
chrX	15287612	15288112
chr9	86536068	86536568
chr1	155197171	155197671
chr16	30381835	30382335
chr5	43121001	43121501
chr14	65569332	65569832
chr11	114270905	114271405
chr22	42486665	42487165
chr6	149353105	149353605
chr6	90348259	90348759
chr14	73131825	73132325
chr14	89029093	89029593
chr9	96928161	96928661
chr5	36151840	36152340
chr15	78286286	78286786
chr16	67595842	67596342
chr14	53173617	53174117
chr16	67207994	67208494
chr2	176032943	176033443
chr1	59314430	59314930
chr1	43824358	43824858
chr14	104387730	104388230
chr1	19536699	19537199
chr14	102605782	102606282
chr5	34838993	34839493
chr1	59398429	59398929
chr17	1587960	1588460
chr22	41032535	41033035
chr15	99417013	99417513
chr5	130599461	130599961
chr5	169122939	169123439
chr2	219134899	219135399
chr3	37217608	37218108
chr1	16499898	16500398
chr19	50143550	50144050
chr8	86132453	86132953
chr3	28282711	28283211
chr6	26421358	26421858
chr10	45454823	45455323
chr14	67826439	67826939
chr10	127407853	127408353
chr3	39447792	39448292
chr2	46843930	46844430
chr14	79745368	79745868
chr19	4791136	4791636
chr1	244327265	244327765
chr7	139026251	139026751
chr19	10946661	10947161
chr15	101667960	101668460
chr19	4471799	4472299
chr15	65282129	65282629
chr20	42568009	42568509
chr22	40440347	40440847
chr5	36502674	36503174
chr6	170615510	170616010
chr6	24721331	24721831
chr15	64338492	64338992
chr5	167241779	167242279
chr11	57435147	57435647
chr6	157342473	157342973
chr6	135375732	135376232
chr6	24666901	24667401
chr10	114847009	114847509
chr9	99212147	99212647
chr20	48531812	48532312
chr1	16508292	16508792
chr19	36705327	36705827
chr3	187121469	187121969
chr1	95537982	95538482
chr1	17380358	17380858
chr20	42086228	42086728
chr15	65579077	65579577
chr12	127610456	127610956
chr1	6844921	6845421
chr14	52924536	52925036
chr15	64524560	64525060
chr3	186857088	186857588
chr3	172428741	172429241
chr19	12511876	12512376
chr15	55700315	55700815
chr1	54303996	54304496
chrX	21816954	21817454
chr12	109085249	109085749
chr10	62537905	62538405
chr2	73460258	73460758
chr1	44435304	44435804
chr9	140024014	140024514
chr3	11609539	11610039
chr1	154155561	154156061
chr6	167040845	167041345
chr15	85131174	85131674
chr3	32612163	32612663
chr17	31562147	31562647
chr21	34144145	34144645
chr3	113233801	113234301
chr17	74068394	74068894
chr19	8008432	8008932
chr14	71221668	71222168
chrY	15016490	15016990
chr15	83680177	83680677
chr15	51057640	51058140
chr12	120875549	120876049
chr10	118706604	118707104
chr14	93799138	93799638
chr17	26645825	26646325
chr7	135194718	135195218
chr14	97263368	97263868
chr20	48788776	48789276
chr14	90849358	90849858
chr5	170041656	170042156
chr15	88308047	88308547
chr20	44992810	44993310
chr3	9690811	9691311
chr1	235667688	235668188
chr12	96429265	96429765
chr7	148725489	148725989
chr6	30685005	30685505
chr1	31769557	31770057
chr1	63988801	63989301
chr11	62608663	62609163
chr1	38061366	38061866
chr9	127905663	127906163
chr6	42858371	42858871
chr17	14641471	14641971
chr3	100755118	100755618
chr10	51572082	51572582
chr17	79995074	79995574
chr8	143808323	143808823
chr1	151881787	151882287
chr6	160321201	160321701
chr5	178692537	178693037
chr20	45443422	45443922
chr5	71604004	71604504
chr14	94839991	94840491
chr5	98108958	98109458
chr3	186288071	186288571
chr8	79578054	79578554
chr16	27561187	27561687
chr7	158497451	158497951
chr9	95527505	95528005
chr22	31503465	31503965
chr20	62289737	62290237
chr1	38157733	38158233
chr2	191184325	191184825
chr19	10828156	10828656
chr7	44613408	44613908
chr15	60666808	60667308
chr14	70233511	70234011
chr3	119217046	119217546
chr8	143464467	143464967
chr14	75348291	75348791
chr20	56122299	56122799
chr6	52217201	52217701
chr2	86421945	86422445
chr5	133304133	133304633
chr1	212458274	212458774
chr11	64684606	64685106
chr15	78591827	78592327
chr6	143771591	143772091
chr11	122932727	122933227
chr9	139795778	139796278
chr1	39864228	39864728
chr8	95907706	95908206
chr5	150169762	150170262
chr10	48332018	48332518
chr5	8829281	8829781
chr6	53191244	53191744
chr15	80216103	80216603
chr1	110881235	110881735
chr17	15602682	15603182
chr5	60597484	60597984
chr5	126112312	126112812
chr8	124054403	124054903
chr17	78428325	78428825
chr12	120524743	120525243
chr9	131873348	131873848
chr15	55700055	55700555
chrX	15756065	15756565
chr20	39969240	39969740
chr9	125702901	125703401
chr11	76155522	76156022
chr6	42306450	42306950
chr3	107941071	107941571
chr6	143223714	143224214
chr20	39946128	39946628
chr7	101372677	101373177
chr11	73490364	73490864
chr1	155931661	155932161
chr14	77428182	77428682
chr19	11485080	11485580
chr17	56595322	56595822
chr9	130341240	130341740
chr2	37995557	37996057
chr15	66648775	66649275
chr1	43824218	43824718
chr12	121124036	121124536
chr1	85156073	85156573
chr8	131495557	131496057
chr9	74526165	74526665
chr3	179322281	179322781
chr2	238969331	238969831
chr20	43513977	43514477
chr19	18303437	18303937
chr8	118532622	118533122
chr16	78133071	78133571
chr6	158461431	158461931
chr3	183735087	183735587
chr19	8943147	8943647
chr22	42466652	42467152
chr14	50999136	50999636
chr17	73851395	73851895
chr3	48701289	48701789
chr3	45052468	45052968
chr6	3209317	3209817
chr16	70415104	70415604
chr11	85885025	85885525
chr6	149887053	149887553
chr20	30467312	30467812
chr1	22196295	22196795
chr2	28615442	28615942
chr7	155061848	155062348
chr21	44816620	44817120
chr9	116163499	116163999
chr2	63815596	63816096
chr17	47841464	47841964
chr7	106808861	106809361
chr11	64037334	64037834
chr6	2765076	2765576
chr1	52195121	52195621
chr2	69828190	69828690
chr19	11707951	11708451
chr1	17454850	17455350
chr5	139936814	139937314
chr6	159141464	159141964
chr21	33984611	33985111
chr5	154237168	154237668
chr3	142297464	142297964
chr14	24616293	24616793
chr3	45730453	45730953
chr14	75086367	75086867
chr6	41039948	41040448
chr6	10452045	10452545
chr5	176973198	176973698
chr3	141030418	141030918
chr20	61905160	61905660
chr3	47554703	47555203
chr6	2765321	2765821
chr19	58838415	58838915
chr9	35657719	35658219
chr15	79223148	79223648
chr11	14913575	14914075
chr10	60616205	60616705
chr5	134094086	134094586
chr17	43138233	43138733
chr7	100303303	100303803
chr8	94766824	94767324
chr11	44883764	44884264
chr5	1385794	1386294
chr22	39101572	39102072
chr19	34850010	34850510
chr10	74057598	74058098
chr9	129676776	129677276
chr12	120105406	120105906
chr3	48594298	48594798
chr2	208103877	208104377
chr10	60028618	60029118
chr15	71055836	71056336
chr20	61371501	61372001
chr6	64282146	64282646
chr14	101539510	101540010
chr2	36608104	36608604
chr2	119966383	119966883
chr3	20095887	20096387
chr20	47154915	47155415
chr1	150533741	150534241
chr17	5094992	5095492
chr5	138940655	138941155
chr15	83478014	83478514
chr17	47841383	47841883
chr10	102772544	102773044
chr1	22351697	22352197
chr17	18218131	18218631
chr1	243419013	243419513
chr1	154955464	154955964
chr12	51441724	51442224
chr2	227700484	227700984
chr5	145826581	145827081
chr14	73109935	73110435
chr3	120067960	120068460
chr2	106020596	106021096
chr17	27139308	27139808
chr17	73696459	73696959
chr3	112280611	112281111
chr2	32581985	32582485
chr12	123236878	123237378
chr2	105654208	105654708
chr15	75198952	75199452
chr2	239772835	239773335
chr17	43138375	43138875
chr1	23345567	23346067
chr14	74262690	74263190
chr5	13985701	13986201
chr7	77427555	77428055
chr14	23755224	23755724
chr17	3571597	3572097
chr17	7475760	7476260
chr14	88851741	88852241
chr10	91403576	91404076
chr5	33049947	33050447
chr7	100450013	100450513
chr8	125384581	125385081
chr3	105587636	105588136
chr17	56595026	56595526
chr7	26198820	26199320
chr1	44820808	44821308
chr17	7760678	7761178
chr15	65349396	65349896
chr3	17784078	17784578
chr8	67525271	67525771
chr6	30719972	30720472
chr17	47270029	47270529
chr9	136739313	136739813
chr14	68066743	68067243
chr5	139944038	139944538
chr14	100150120	100150620
chr20	42839459	42839959
chr6	157744037	157744537
chr14	59198118	59198618
chr20	44462105	44462605
chr1	228327491	228327991
chr15	100890223	100890723
chr12	121837528	121838028
chr3	49395667	49396167
chr5	172286017	172286517
chr15	79603237	79603737
chr14	62020474	62020974
chr1	228353512	228354012
chr6	137113486	137113986
chr16	30934433	30934933
chr14	21924100	21924600
chr15	86337960	86338460
chr8	128911669	128912169
chr17	76836679	76837179
chr15	81282117	81282617
chr15	99644918	99645418
chr20	34204108	34204608
chr3	20227528	20228028
chr5	162887289	162887789
chr3	98312316	98312816
chr15	89878147	89878647
chr3	141868129	141868629
chr2	43822949	43823449
chr9	128508239	128508739
chr8	125551086	125551586
chr14	74111409	74111909
chr1	76190126	76190626
chr5	64858753	64859253
chr10	104677689	104678189
chr4	775469	775969
chr10	95205197	95205697
chr2	64067774	64068274
chr5	95297428	95297928
chr7	39989065	39989565
chr11	62358963	62359463
chr1	36022769	36023269
chr19	39390209	39390709
chr9	117349619	117350119
chr1	201244362	201244862
chr8	141319651	141320151
chr9	128003636	128004136
chr15	52684415	52684915
chr20	44407502	44408002
chr14	62228815	62229315
chr1	40505455	40505955
chr3	134082913	134083413
chr19	37742416	37742916
chr16	31085364	31085864
chr21	40555221	40555721
chr11	66103940	66104440
chr6	33216964	33217464
chr16	57219794	57220294
chr17	17942338	17942838
chr2	32288290	32288790
chr5	74807377	74807877
chr12	133656605	133657105
chr20	52390300	52390800
chr3	180629897	180630397
chr16	30759375	30759875
chr15	64828306	64828806
chr22	29999190	29999690
chr6	32812211	32812711
chr5	110848172	110848672
chr2	127415354	127415854
chr1	40480829	40481329
chr8	110552096	110552596
chr2	232378874	232379374
chr20	49961938	49962438
chr6	150185230	150185730
chr10	99258351	99258851
chr8	64080906	64081406
chr16	84565894	84566394
chr16	9141471	9141971
chr15	67134614	67135114
chr5	176778690	176779190
chr3	48700939	48701439
chr15	70778933	70779433
chr2	55459179	55459679
chr15	63449483	63449983
chr5	96271338	96271838
chrX	9498961	9499461
chr9	117670295	117670795
chr3	44379658	44380158
chr10	121065576	121066076
chr3	52188535	52189035
chr10	115933830	115934330
chr8	134045416	134045916
chr11	64863934	64864434
chr3	134076600	134077100
chr3	183088525	183089025
chr1	22196147	22196647
chr7	140396236	140396736
chr11	63741643	63742143
chr5	81267564	81268064
chr5	176944022	176944522
chr2	190648883	190649383
chr17	47866339	47866839
chr21	38361996	38362496
chr1	36235365	36235865
chr1	94203814	94204314
chr17	6938998	6939498
chr1	23730281	23730781
chr15	91999408	91999908
chr1	14075619	14076119
chr9	125667527	125668027
chr3	194991723	194992223
chr11	66738189	66738689
chr17	21029971	21030471
chr14	23058079	23058579
chr17	79017699	79018199
chr21	35013874	35014374
chr15	70005342	70005842
chr7	44621640	44622140
chr6	42952019	42952519
chr5	172160626	172161126
chr1	235061439	235061939
chr14	31495514	31496014
chr3	121553751	121554251
chr14	69865129	69865629
chr3	88108126	88108626
chr16	15993484	15993984
chr1	41826558	41827058
chr11	112096805	112097305
chr3	107241564	107242064
chr3	8485974	8486474
chr3	101394922	101395422
chr19	58873691	58874191
chr7	155137537	155138037
chr20	49982910	49983410
chr8	95565529	95566029
chr1	174968568	174969068
chr12	2999671	3000171
chr15	73075963	73076463
chr5	93954048	93954548
chr16	53537054	53537554
chr7	56173985	56174485
chr15	97310873	97311373
chr19	11849669	11850169
chr15	55582617	55583117
chr5	40835172	40835672
chr12	56367421	56367921
chr5	136957830	136958330
chr15	96705536	96706036
chr15	78200763	78201263
chr9	100818756	100819256
chr2	73298275	73298775
chr16	66906980	66907480
chr5	132012808	132013308
chr10	104677539	104678039
chr14	102746300	102746800
chr3	192597466	192597966
chr3	57678148	57678648
chr19	7894706	7895206
chr16	70323190	70323690
chr7	51113385	51113885
chrX	9498850	9499350
chr19	36193147	36193647
chr12	121562188	121562688
chr6	43596789	43597289
chr19	41283713	41284213
chr2	46300530	46301030
chr10	101380563	101381063
chr3	27575263	27575763
chr3	27410728	27411228
chr12	112563034	112563534
chr2	120124274	120124774
chr11	13689868	13690368
chr9	86536235	86536735
chr8	96036995	96037495
chr15	89786929	89787429
chr2	69664368	69664868
chr12	124118118	124118618
chr1	172501935	172502435
chr15	92396283	92396783
chr12	113277131	113277631
chr20	47662480	47662980
chr17	72565577	72566077
chr1	41157607	41158107
chr3	47866178	47866678
chr14	95973511	95974011
chr15	82338267	82338767
chr21	30374876	30375376
chr7	44835912	44836412
chr9	130477788	130478288
chr1	109968895	109969395
chr1	12079271	12079771
chr12	105501301	105501801
chr6	30685133	30685633
chr11	76288201	76288701
chr3	111521956	111522456
chr3	66551300	66551800
chr7	39662882	39663382
chr9	88969128	88969628
chr2	48541239	48541739
chr7	100888125	100888625
chr11	108368286	108368786
chr1	22257530	22258030
chr10	102132961	102133461
chr17	1419802	1420302
chr11	6255697	6256197
chr15	99995039	99995539
chr3	125314190	125314690
chr14	36278213	36278713
chr3	123679966	123680466
chr8	126442249	126442749
chr17	71307977	71308477
chr13	114830684	114831184
chr5	957354	957854
chr20	34330221	34330721
chr3	97540546	97541046
chr1	226111786	226112286
chr15	57998560	57999060
chr9	112555461	112555961
chr19	55677796	55678296
chr7	100887841	100888341
chr10	120840189	120840689
chr10	77118572	77119072
chr6	80714013	80714513
chr5	149522765	149523265
chrX	13416565	13417065
[truncated: 48,001 more rows]

## Sheet: S8B Het1A-HNF4A 2d 5x open
Chr	Start	End	Annotation	Detailed Annotation	Distance to TSS	Nearest PromoterID	Entrez ID	Nearest Unigene	Nearest Refseq	Nearest Ensembl	Gene Name	Gene Alias	Gene Description	Gene Type	Log2(Het1a-HNF4A 2d/Het1a +dox)
chr6	90958733	90959233	intron (NM_001170794, intron 1 of 6)	intron (NM_001170794, intron 1 of 6)	47644	NM_021813	60468	Hs.269764	NM_021813	ENSG00000112182	BACH2	BTBD25	BTB domain and CNC homolog 2	protein-coding	2.32602
chr18	20679513	20680013	Intergenic	Intergenic	-34765	NM_001256438	91768	Hs.11108	NM_138375	ENSG00000134508	CABLES1	CABL1|CABLES|HsT2563|IK3-1	Cdk5 and Abl enzyme substrate 1	protein-coding	3.09382
chr15	62762374	62762874	Intergenic	Intergenic	127396	NR_106733	102464834		NR_106733	ENSG00000275451	MIR6085	hsa-mir-6085	microRNA 6085	ncRNA	3.32176
chr6	158826464	158826964	intron (NM_001007466, intron 1 of 12)	LTR14B|LTR|ERVK	93022	NM_020245	56995	Hs.486993	NM_020245	ENSG00000130338	TULP4	TUSP	tubby like protein 4	protein-coding	2.70784
chr11	72906243	72906743	Intergenic	Intergenic	-22850	NM_176072	5029	Hs.339	NM_002564	ENSG00000175591	P2RY2	HP2U|P2RU1|P2U|P2U1|P2UR|P2Y2|P2Y2R	purinergic receptor P2Y2	protein-coding	2.5855
chr8	91704890	91705582	Intergenic	Intergenic	-47103	NM_001146273	169200	Hs.567759	NM_001008495	ENSG00000180694	TMEM64	-	transmembrane protein 64	protein-coding	2.8066
chr6	3527154	3527654	Intergenic	Intergenic	-70611	NM_015482	63027	Hs.713588	NM_015482	ENSG00000137266	SLC22A23	C6orf85	solute carrier family 22 member 23	protein-coding	4.01432
chr12	110065474	110065974	Intergenic	Intergenic	54224	NM_001114185	4598	Hs.130607	NM_000431	ENSG00000110921	MVK	LRBP|MK|MVLK|POROK3	mevalonate kinase	protein-coding	3.88147
chr19	41468245	41468909	Intergenic	Intergenic	-28627	NM_000767	1555	Hs.1360	NM_000767	ENSG00000197408	CYP2B6	CPB6|CYP2B|CYP2B7|CYP2B7P|CYPIIB6|EFVM|IIB1|P450	cytochrome P450 family 2 subfamily B member 6	protein-coding	2.78444
chr1	19248828	19249766	intron (NM_001136265, intron 1 of 8)	MIR3|SINE|MIR	-20004	NM_003748	8659	Hs.77448	NM_003748	ENSG00000159423	ALDH4A1	ALDH4|P5CD|P5CDh	aldehyde dehydrogenase 4 family member A1	protein-coding	4.62608
chr3	46153676	46154176	Intergenic	HERVP71A-int|LTR|ERV1	-84947	NM_005283	2829	Hs.128375	NM_005283	ENSG00000173578	XCR1	CCXCR1|GPR5	X-C motif chemokine receptor 1	protein-coding	3.2695
chr14	94788816	94789316	intron (NM_001756, intron 1 of 4)	intron (NM_001756, intron 1 of 4)	622	NM_001756	866	Hs.532635	NM_001756	ENSG00000170099	SERPINA6	CBG	serpin family A member 6	protein-coding	3.30336
chrX	73471229	73471729	intron (NR_028379, intron 5 of 6)	MER21C|LTR|ERVL	-33026	NR_030620	100126317		NR_030620	ENSG00000212027	MIR374B	MIRN374B|mir-374b	microRNA 374b	ncRNA	3.7302
chr10	126008627	126009127	Intergenic	Intergenic	98668	NM_001322968	4942	Hs.523332	NM_000274	ENSG00000065154	OAT	GACR|HOGA|OATASE|OKT	ornithine aminotransferase	protein-coding	5.60559
chr6	35487410	35487910	Intergenic	Intergenic	-6945	NM_003322	7287	Hs.485208	NM_003322	ENSG00000112041	TULP1	LCA15|RP14|TUBL1	tubby like protein 1	protein-coding	3.07557
chr3	62859227	62860088	intron (NM_183394, intron 1 of 27)	CpG	1406	NM_003716	8618	Hs.654933	NM_003716	ENSG00000163618	CADPS	CADPS1|CAPS|CAPS1|UNC-31	calcium dependent secretion activator	protein-coding	3.22453
chr10	73003596	73004457	intron (NM_170744, intron 1 of 16)	intron (NM_170744, intron 1 of 16)	-26042	NR_038453	728978	Hs.646725	NR_038453	ENSG00000237512	UNC5B-AS1	-	UNC5B antisense RNA 1	ncRNA	4.35556
chr7	155156285	155156785	intron (NR_103545, intron 1 of 5)	intron (NR_103545, intron 1 of 5)	4093	NR_103545	338436	Hs.521326	NR_103545	ENSG00000204960	BLACE	-	B-cell acute lymphoblastic leukemia expressed	ncRNA	5.89556
chrX	102892820	102893320	Intergenic	Intergenic	9178	NM_001006639	9338	Hs.95243	NM_004780	ENSG00000172465	TCEAL1	SIIR|WEX9|p21|pp21	transcription elongation factor A like 1	protein-coding	3.3143
chr15	61044729	61045229	intron (NM_134261, intron 1 of 10)	intron (NM_134261, intron 1 of 10)	71211	NR_120318	100996876	Hs.511626	NR_120318		RORA-AS2	-	RORA antisense RNA 2	ncRNA	3.93159
chr12	121605919	121606419	intron (NM_002562, intron 8 of 12)	AluSz|SINE|Alu	35538	NR_033955	5027	Hs.729169	NM_002562	ENSG00000089041	P2RX7	P2X7	purinergic receptor P2X 7	protein-coding	3.99816
chr2	62688810	62689310	Intergenic	Intergenic	44544	NM_198276	200728	Hs.308028	NM_198276	ENSG00000186889	TMEM17	-	transmembrane protein 17	protein-coding	3.27936
chr7	46669554	46670054	Intergenic	Intergenic	66916	NR_134575	730338	Hs.640207	NR_134575	ENSG00000233539	LOC730338	-	uncharacterized LOC730338	ncRNA	4.73548
chr11	76746462	76746962	intron (NM_138706, intron 1 of 4)	intron (NM_138706, intron 1 of 4)	1327	NM_138706	192134	Hs.352622	NM_138706	ENSG00000198488	B3GNT6	B3Gn-T6|BGnT-6|beta-1,3-Gn-T6|beta3Gn-T6	UDP-GlcNAc:betaGal beta-1,3-N-acetylglucosaminyltransferase 6	protein-coding	4.15297
chr14	89527971	89528471	Intergenic	L2c|LINE|L2	237724	NM_001288782	123016	Hs.303055	NM_144596	ENSG00000165533	TTC8	BBS8|RP51	tetratricopeptide repeat domain 8	protein-coding	4.11838
chr14	65705727	65706587	Intergenic	Intergenic	-17092	NR_103769	100128233	Hs.497323	NR_103769	ENSG00000255002	LOC100128233	-	uncharacterized LOC100128233	ncRNA	4.1219
chr1	52102378	52103149	intron (NM_148906, intron 1 of 22)	intron (NM_148906, intron 1 of 22)	20218	NM_148906	114883	Hs.21938	NM_024586	ENSG00000117859	OSBPL9	ORP-9|ORP9	oxysterol binding protein like 9	protein-coding	2.4698
chr9	139795777	139796277	intron (NM_021138, intron 4 of 10)	L1MB3|LINE|L1	14842	NR_039697	100616480		NR_039697	ENSG00000266507	MIR4479	-	microRNA 4479	ncRNA	2.8917
chr20	48988541	48989041	Intergenic	MLT1J|LTR|ERVL-MaLR	-50912	NR_109950	101927586	Hs.637665	NR_109950	ENSG00000233077	LINC01271	-	long intergenic non-protein coding RNA 1271	ncRNA	3.21581
chr19	4145688	4146188	Intergenic	Intergenic	-7660	NM_001271995	84699	Hs.247744	NM_032607	ENSG00000060566	CREB3L3	CREB-H|CREBH|HYST1481	cAMP responsive element binding protein 3 like 3	protein-coding	4.04414
chr1	234129310	234129810	intron (NM_173508, intron 2 of 7)	intron (NM_173508, intron 2 of 7)	89102	NM_173508	148641	Hs.158748	NM_173508	ENSG00000183780	SLC35F3	-	solute carrier family 35 member F3	protein-coding	2.66313
chr7	30072255	30072863	intron (NM_001197027, intron 1 of 13)	intron (NM_001197027, intron 1 of 13)	4582	NM_001197027	84725	Hs.233495	NM_032639	ENSG00000106086	PLEKHA8	FAPP2	pleckstrin homology domain containing A8	protein-coding	3.18031
chr1	179899382	179899882	Intergenic	Intergenic	-24276	NM_014810	9857	Hs.413045	NM_014810	ENSG00000135837	CEP350	CAP350|GM133	centrosomal protein 350	protein-coding	3.3354
chr15	79349248	79349748	intron (NM_002891, intron 3 of 27)	MER45C|DNA|hAT-Tip100	33717	NM_001145648	5923	Hs.459035	NM_002891	ENSG00000058335	RASGRF1	CDC25|CDC25L|GNRP|GRF1|GRF55|H-GRF55|PP13187|ras-GRF1	Ras protein specific guanine nucleotide releasing factor 1	protein-coding	3.96472
chr1	20070797	20071297	intron (NM_181719, intron 10 of 15)	L2b|LINE|L2	55363	NM_181719	255104	Hs.656313	NM_181719	ENSG00000162542	TMCO4	-	transmembrane and coiled-coil domains 4	protein-coding	4.23076
chr15	31588844	31589344	Intergenic	Intergenic	-29964	NM_001302461	51621	Hs.376443	NM_015995	ENSG00000169926	KLF13	BTEB3|FKLF2|NSLP1|RFLAT-1|RFLAT1	Kruppel like factor 13	protein-coding	4.19868
chr1	25695690	25696190	intron (NM_001330430, intron 8 of 8)	intron (NM_001330430, intron 8 of 8)	31151	NM_014313	23585	Hs.705699	NM_014313	ENSG00000183726	TMEM50A	IFNRC|SMP1	transmembrane protein 50A	protein-coding	3.34327
chr20	44076892	44077392	Intergenic	L2a|LINE|L2	-21252	NM_006103	10406	Hs.2719	NM_006103	ENSG00000101443	WFDC2	EDDM4|HE4|WAP5|dJ461P17.6	WAP four-disulfide core domain 2	protein-coding	3.04837
chr8	8191329	8191829	intron (NM_001080826, intron 4 of 6)	intron (NM_001080826, intron 4 of 6)	47765	NM_001080826	157285	Hs.583863	NM_001080826	ENSG00000275342	PRAG1	NACK|PEAK2|PRAGMIN|SGK223	PEAK1 related kinase activating pseudokinase 1	protein-coding	3.07606
chr1	20187422	20188283	Intergenic	Intergenic	-21035	NM_015207	23252	Hs.374987	NM_015207	ENSG00000169914	OTUD3	DUBA4	OTU deubiquitinase 3	protein-coding	3.85467
chr20	47489439	47489939	Intergenic	Intergenic	-45269	NM_020820	57580	Hs.153310	NM_020820	ENSG00000124126	PREX1	P-REX1	phosphatidylinositol-3,4,5-trisphosphate dependent Rac exchange factor 1	protein-coding	3.73748
chr4	124399891	124400391	Intergenic	Intergenic	79496	NM_005841	10252	Hs.744854	NM_005841	ENSG00000164056	SPRY1	hSPRY1	sprouty RTK signaling antagonist 1	protein-coding	3.54988
chr17	40718888	40719987	intron (NM_170607, intron 1 of 7)	CpG	360	NM_198204	6945	Hs.383019	NM_170607	ENSG00000108788	MLX	MAD7|MXD7|TCFL4|TF4|bHLHd13	MLX, MAX dimerization protein	protein-coding	2.46787
chr7	130671787	130672287	intron (NR_109855, intron 2 of 4)	L2a|LINE|L2	73814	NR_109780	100506860	Hs.635013	NR_109780		LINC00513	-	long intergenic non-protein coding RNA 513	ncRNA	2.94252
chr6	29732424	29732924	Intergenic	Intergenic	-13749	NR_001590	340198	Hs.450189	NR_001590	ENSG00000235821	IFITM4P	dJ377H14.5	interferon induced transmembrane protein 4 pseudogene	pseudo	2.97543
chr20	33140953	33141453	intron (NM_181509, intron 2 of 4)	intron (NM_181509, intron 2 of 4)	-5298	NM_032514	84557	Hs.632273	NM_032514	ENSG00000101460	MAP1LC3A	ATG8E|LC3|LC3A|MAP1ALC3|MAP1BLC3	microtubule associated protein 1 light chain 3 alpha	protein-coding	3.22617
chr8	144600989	144601813	intron (NM_015117, intron 3 of 11)	intron (NM_015117, intron 3 of 11)	22219	NM_015117	23144	Hs.521915	NM_015117	ENSG00000014164	ZC3H3	ZC3HDC3	zinc finger CCCH-type containing 3	protein-coding	4.03074
chr2	173345089	173345980	intron (NM_001079818, intron 11 of 24)	L1MA3|LINE|L1	53252	NM_001079818	3655	Hs.133397	NM_000210	ENSG00000091409	ITGA6	CD49f|ITGA6B|VLA-6	integrin subunit alpha 6	protein-coding	3.6124
chr9	139538806	139539734	Intergenic	Intergenic	-14038	NR_046367	51162	Hs.91481	NM_016215	ENSG00000172889	EGFL7	NEU1|VE-STATIN|ZNEU1	EGF like domain multiple 7	protein-coding	2.43002
chr1	156039792	156040292	exon (NM_020387, exon 5 of 5)	exon (NM_020387, exon 5 of 5)	9102	NR_133653	57111	Hs.632469	NM_020387	ENSG00000132698	RAB25	CATX-8|RAB11C	RAB25, member RAS oncogene family	protein-coding	3.49972
chr14	50347072	50347572	Intergenic	MER21C|LTR|ERVL	-12414	NM_001663	382	Hs.525330	NM_001663	ENSG00000165527	ARF6	-	ADP ribosylation factor 6	protein-coding	3.74801
chr5	40996283	40996783	Intergenic	MLT1F|LTR|ERVL-MaLR	74911	NM_173489	133558	Hs.97714	NM_173489	ENSG00000171495	MROH2B	HEATR7B2	maestro heat like repeat family member 2B	protein-coding	4.65016
chr15	81331219	81331719	Intergenic	L2c|LINE|L2	38174	NM_022566	59274	Hs.513071	NM_022566	ENSG00000140406	MESDC1	-	mesoderm development candidate 1	protein-coding	4.60585
chr4	2364997	2365497	intron (NM_001172657, intron 1 of 6)	MER70B|LTR|ERVL	1357	NM_001172660	57732	Hs.292056	NM_020972	ENSG00000159733	ZFYVE28	LST2|LYST2	zinc finger FYVE-type containing 28	protein-coding	4.2479
chr22	25362142	25362642	Intergenic	Intergenic	-27078	NM_001001663	255349	Hs.329040	NM_001001663	ENSG00000206069	TMEM211	bA9F11.1	transmembrane protein 211	protein-coding	2.71737
chr12	124080240	124080740	intron (NM_001321445, intron 4 of 4)	AluJr|SINE|Alu	-6134	NR_135104	57696	Hs.286173	NM_020936	ENSG00000111364	DDX55	-	DEAD-box helicase 55	protein-coding	3.30999
chr7	2741469	2741969	intron (NM_001321766, intron 2 of 6)	intron (NM_001321766, intron 2 of 6)	13883	NM_001321766	155185	Hs.42221	NM_133463	ENSG00000174945	AMZ1	-	archaelysin family metallopeptidase 1	protein-coding	5.24353
chr3	48110316	48110816	intron (NM_001134364, intron 1 of 17)	intron (NM_001134364, intron 1 of 17)	20203	NM_030885	4134	Hs.517949	NM_002375	ENSG00000047849	MAP4	-	microtubule associated protein 4	protein-coding	2.50315
chr8	143758255	143758755	intron (NR_033343, intron 1 of 2)	intron (NR_033343, intron 1 of 2)	-3369	NM_005672	8000	Hs.652235	NM_005672	ENSG00000167653	PSCA	PRO232	prostate stem cell antigen	protein-coding	2.74279
chr1	19413834	19414334	intron (NM_020765, intron 99 of 105)	intron (NM_020765, intron 99 of 105)	122662	NM_020765	23352	Hs.148078	NM_020765	ENSG00000127481	UBR4	RBAF600|ZUBR1|p600	ubiquitin protein ligase E3 component n-recognin 4	protein-coding	4.5554
chr15	66580317	66580817	Intergenic	Intergenic	-5028	NM_001323937	115752	Hs.446251	NM_133375	ENSG00000166938	DIS3L	DIS3L1	DIS3 like exosome 3'-5' exoribonuclease	protein-coding	5.01845
chr14	105267640	105268140	exon (NM_001137601, exon 1 of 1)	exon (NM_001137601, exon 1 of 1)	372	NM_001137601	100128927	Hs.170853	NM_001137601	ENSG00000179627	ZBTB42	LCCS6|ZNF925	zinc finger and BTB domain containing 42	protein-coding	3.81549
chr8	143743532	143744032	3' UTR (NM_003724, exon 3 of 3)	3' UTR (NM_003724, exon 3 of 3)	7630	NM_003724	8629	Hs.535903	NM_003724	ENSG00000234616	JRK	JH8|jerky	Jrk helix-turn-helix protein	protein-coding	2.45633
chr3	134028789	134029289	Intergenic	Intergenic	57665	NR_106885	102466744		NR_106885	ENSG00000277723	MIR6827	hsa-mir-6827	microRNA 6827	ncRNA	3.12738
chr19	33532014	33532715	intron (NM_033103, intron 2 of 14)	intron (NM_033103, intron 2 of 14)	23459	NM_033103	85415	Hs.466435	NM_033103	ENSG00000131941	RHPN2	P76RBE|RHOBP	rhophilin Rho GTPase binding protein 2	protein-coding	2.58286
chr5	91888279	91888881	Intergenic	Intergenic	1018469	NR_109825	441094	Hs.457407	NR_015369	ENSG00000237187	NR2F1-AS1	-	NR2F1 antisense RNA 1	ncRNA	3.10185
chr8	58432866	58433366	Intergenic	Intergenic	176770	NR_125818	101929488	Hs.407557	NR_125818	ENSG00000253871	LOC101929488	-	uncharacterized LOC101929488	ncRNA	3.30365
chr11	45951209	45951709	TTS (NM_001300722)	TTS (NM_001300722)	7232	NM_001300721	120071	Hs.86543	NM_152312	ENSG00000165905	LARGE2	GYLTL1B|PP5656	LARGE xylosyl- and glucuronyltransferase 2	protein-coding	4.91788
chr17	716997	717497	intron (NM_022463, intron 5 of 7)	AluSx1|SINE|Alu	-31676	NM_016080	51031	Hs.279061	NM_016080	ENSG00000167699	GLOD4	C17orf25|CGI-150|HC71	glyoxalase domain containing 4	protein-coding	2.90763
chr11	62657361	62657861	Intergenic	MER77B|LTR|ERVL	8440	NR_037193	6520	Hs.502769	NM_002394	ENSG00000168003	SLC3A2	4F2|4F2HC|4T2HC|CD98|CD98HC|MDU1|NACAE	solute carrier family 3 member 2	protein-coding	2.75943
chr17	60706748	60707248	intron (NM_006039, intron 1 of 29)	intron (NM_006039, intron 1 of 29)	2236	NM_006039	9902	Hs.7835	NM_006039	ENSG00000011028	MRC2	CD280|CLEC13E|ENDO180|UPARAP	mannose receptor C type 2	protein-coding	3.23451
chr15	101979523	101980210	intron (NM_138322, intron 3 of 10)	intron (NM_138322, intron 3 of 10)	50320	NM_138323	5046	Hs.498494	NM_002570	ENSG00000140479	PCSK6	PACE4|SPC4	proprotein convertase subtilisin/kexin type 6	protein-coding	4.29212
chr3	123359418	123360319	intron (NM_053027, intron 27 of 32)	intron (NM_053027, intron 27 of 32)	-20415	NM_053032	4638	Hs.477375	NM_005965	ENSG00000065534	MYLK	AAT7|KRP|MLCK|MLCK1|MLCK108|MLCK210|MSTP083|MYLK1|smMLCK	myosin light chain kinase	protein-coding	4.70046
chr1	169029213	169029713	intron (NR_104091, intron 2 of 4)	intron (NR_104091, intron 2 of 4)	26780	NR_104091	101978719	Hs.517849	NR_104091	ENSG00000203601	LINC00970	-	long intergenic non-protein coding RNA 970	ncRNA	2.9346
chr8	89721146	89721646	Intergenic	LTR35B|LTR|ERV1	-381679	NM_005941	4325	Hs.492187	NM_005941	ENSG00000156103	MMP16	C8orf57|MMP-X2|MT-MMP2|MT-MMP3|MT3-MMP	matrix metallopeptidase 16	protein-coding	3.77699
chr8	121821874	121822374	intron (NM_021021, intron 1 of 6)	intron (NM_021021, intron 1 of 6)	2185	NM_021021	6641	Hs.46701	NM_021021	ENSG00000172164	SNTB1	59-DAP|A1B|BSYN2|DAPA1B|SNT2|SNT2B1|TIP-43	syntrophin beta 1	protein-coding	4.61846
chr17	56612727	56613227	intron (NM_001198713, intron 1 of 11)	intron (NM_001198713, intron 1 of 11)	-3532	NM_080416	5414	Hs.287518	NM_004574	ENSG00000108387	2004-09-01	ARTS|BRADEION|CE5B3|H5|MART|PNUTL2|SEP4|hCDCREL-2|hucep-7	septin 4	protein-coding	3.40154
chr11	70058517	70059017	Intergenic	Intergenic	9498	NM_003824	8772	Hs.86131	NM_003824	ENSG00000168040	FADD	GIG3|MORT1	Fas associated via death domain	protein-coding	4.37265
chr10	105305093	105305593	intron (NM_004210, intron 1 of 5)	intron (NM_004210, intron 1 of 5)	-28144	NR_120675	102724341	Hs.599425	NR_120675	ENSG00000235470	NEURL1-AS1	-	NEURL1 antisense RNA 1	ncRNA	4.17561
chr8	8402598	8403098	Intergenic	Intergenic	-156818	NM_194284	137075	Hs.183617	NM_194284	ENSG00000253958	CLDN23	CLDNL|hCG1646163	claudin 23	protein-coding	3.37207
chr2	241308107	241308607	Intergenic	Intergenic	-66758	NM_002081	2817	Hs.328232	NM_002081	ENSG00000063660	GPC1	glypican	glypican 1	protein-coding	4.58607
chr10	112087044	112087544	Intergenic	Intergenic	-22587	NM_005871	10285	Hs.632093	NM_005871	ENSG00000119953	SMNDC1	SMNR|SPF30|TDRD16C	survival motor neuron domain containing 1	protein-coding	4.91105
chr17	58650402	58651144	intron (NR_126009, intron 2 of 3)	intron (NR_126009, intron 2 of 3)	8866	NR_126009	388406	Hs.368309	NR_126009	ENSG00000267772	LINC01999	-	long intergenic non-protein coding RNA 1999	ncRNA	2.90534
chr10	111725178	111725678	intron (NR_038943, intron 2 of 4)	intron (NR_038943, intron 2 of 4)	-30680	NM_001320591	120	Hs.501012	NM_001121	ENSG00000148700	ADD3	ADDL|CPSQ3	adducin 3	protein-coding	2.74617
chr16	28598707	28599207	intron (NM_138414, intron 4 of 9)	intron (NM_138414, intron 4 of 9)	8844	NM_177528	6799	Hs.546304	NM_001054	ENSG00000197165	SULT1A2	HAST4|P-PST|ST1A2|STP2|TSPST2	sulfotransferase family 1A member 2	protein-coding	2.80586
chr20	62728689	62729189	intron (NM_001318855, intron 1 of 2)	MER5A|DNA|hAT-Charlie	4898	NM_001318855	4987	Hs.2859	NM_000913	ENSG00000125510	OPRL1	KOR-3|NOCIR|NOP|NOPr|OOR|ORL1	opioid related nociceptin receptor 1	protein-coding	3.4133
chr5	55298931	55299431	non-coding (NR_102755, exon 2 of 2)	non-coding (NR_102755, exon 2 of 2)	8186	NR_102755	441072	Hs.482141	NR_102755	ENSG00000227908	FLJ31104	-	uncharacterized LOC441072	ncRNA	2.85176
chr12	65507320	65507820	intron (NM_007191, intron 2 of 9)	intron (NM_007191, intron 2 of 9)	7776	NM_007191	11197	Hs.284122	NM_007191	ENSG00000156076	WIF1	WIF-1	WNT inhibitory factor 1	protein-coding	4.76709
chr7	13781729	13782229	Intergenic	Intergenic	244160	NM_001163150	2115	Hs.22634	NM_004956	ENSG00000006468	ETV1	ER81	ETS variant 1	protein-coding	3.3719
chr8	144382758	144383258	TTS (NM_030895)	TTS (NM_030895)	9449	NM_030895	79943	Hs.512740	NM_030895	ENSG00000185730	ZNF696	-	zinc finger protein 696	protein-coding	3.51202
chr11	125979612	125980598	Intergenic	Intergenic	-46918	NM_001243597	50937	Hs.38034	NM_016952	ENSG00000064309	CDON	CDO|CDON1|HPE11|ORCAM	cell adhesion associated, oncogene regulated	protein-coding	3.03041
chr14	93452572	93453072	intron (NM_001142593, intron 5 of 10)	intron (NM_001142593, intron 5 of 10)	63377	NM_001275	1113	Hs.150793	NM_001275	ENSG00000100604	CHGA	CGA	chromogranin A	protein-coding	2.57085
chr21	36423505	36424258	Intergenic	Intergenic	-2287	NM_001754	861	Hs.149261	NM_001754	ENSG00000159216	RUNX1	AML1|AML1-EVI-1|AMLCR1|CBF2alpha|CBFA2|EVI-1|PEBP2aB|PEBP2alpha	runt related transcription factor 1	protein-coding	3.10217
chr14	62768568	62769068	Intergenic	LTR79|LTR|ERVL	-162127	NR_104063	101954204	Hs.607093	NR_104063	ENSG00000259142	LINC00644	-	long intergenic non-protein coding RNA 644	ncRNA	2.74437
chr15	70097456	70097956	Intergenic	Intergenic	-29867	NR_026764	414926	Hs.569502	NR_026764	ENSG00000259703	LINC00593	C15orf50	long intergenic non-protein coding RNA 593	ncRNA	3.49271
chrX	17421390	17421890	intron (NM_001291867, intron 1 of 8)	intron (NM_001291867, intron 1 of 8)	-22364	NR_039925	100616249		NR_039925	ENSG00000265465	MIR4768	-	microRNA 4768	ncRNA	4.95895
chr8	92039337	92039837	intron (NM_018710, intron 1 of 6)	ERVL-E-int|LTR|ERVL	13616	NM_018710	55529	Hs.202517	NM_018710	ENSG00000155099	TMEM55A	-	transmembrane protein 55A	protein-coding	3.44651
chr20	43489949	43490646	Intergenic	Intergenic	-23942	NM_139323	7529	Hs.643544	NM_003404	ENSG00000166913	YWHAB	GW128|HEL-S-1|HS1|KCIP-1|YWHAA	tyrosine 3-monooxygenase/tryptophan 5-monooxygenase activation protein beta	protein-coding	5.19628
chr2	69794273	69794773	intron (NM_014911, intron 2 of 21)	L2b|LINE|L2	-47220	NR_003705	100124535	Hs.693447	NR_003705	ENSG00000207016	SNORA36C	-	small nucleolar RNA, H/ACA box 36C	snoRNA	2.41722
chr15	61619111	61619800	Intergenic	Intergenic	-97954	NM_134261	6095	Hs.560343	NM_002943	ENSG00000069667	RORA	NR1F1|ROR1|ROR2|ROR3|RZR-ALPHA|RZRA	RAR related orphan receptor A	protein-coding	4.51008
chr8	142539738	142540238	Intergenic	Intergenic	-22658	NR_102364	389690	Hs.689547	NM_207414	ENSG00000226807	MROH5	-	maestro heat like repeat family member 5	protein-coding	5.03448
chr12	91076129	91076629	Intergenic	Intergenic	-235421	NR_038868	439916	Hs.350600	NM_001039384	ENSG00000196243	LINC00615	C12orf37	long intergenic non-protein coding RNA 615	ncRNA	2.75759
chr3	284785	285406	intron (NR_045572, intron 1 of 2)	intron (NR_045572, intron 1 of 2)	45770	NR_045572	10752	Hs.148909	NM_006614	ENSG00000134121	CHL1	CALL|L1CAM2	cell adhesion molecule L1 like	protein-coding	3.81046
chr5	95336933	95337433	intron (NR_130776, intron 1 of 4)	intron (NR_130776, intron 1 of 4)	-39408	NM_012081	22936	Hs.192221	NM_012081	ENSG00000118985	ELL2	-	elongation factor for RNA polymerase II 2	protein-coding	4.5436
chr3	27358525	27359025	intron (NM_152534, intron 7 of 38)	intron (NM_152534, intron 7 of 38)	52176	NM_199347	152110	Hs.506115	NM_152534	ENSG00000163491	NEK10	-	NIMA related kinase 10	protein-coding	4.7098
chr1	20537913	20538413	Intergenic	Intergenic	-25184	NR_110078	101928017	Hs.550803	NR_110078	ENSG00000225986	UBXN10-AS1	-	UBXN10 antisense RNA 1	ncRNA	2.37843
chr10	72568916	72569416	Intergenic	Intergenic	-6538	NM_003901	8879	Hs.499984	NM_003901	ENSG00000166224	SGPL1	S1PL|SPL	sphingosine-1-phosphate lyase 1	protein-coding	4.0419
chr17	39572118	39572618	Intergenic	MIRb|SINE|MIR	8454	NM_003770	8688	Hs.673852	NM_003770	ENSG00000108417	KRT37	HA7|K37|KRTHA7	keratin 37	protein-coding	2.43006
chr1	52402139	52402639	intron (NM_002867, intron 3 of 4)	L2c|LINE|L2	54047	NM_002867	5865	Hs.123072	NM_002867	ENSG00000169213	RAB3B	-	RAB3B, member RAS oncogene family	protein-coding	3.07741
chr22	50585220	50585720	promoter-TSS (NM_001164106)	promoter-TSS (NM_001164106)	-14	NM_001164106	54456	Hs.62880	NM_018995	ENSG00000073146	MOV10L1	CHAMP|DJ402G11.8	Mov10 RISC complex RNA helicase like 1	protein-coding	2.54471
chr11	116434052	116434552	Intergenic	Intergenic	-75837	NR_135069	101929011	Hs.733911	NR_135069	ENSG00000237937	LOC101929011	-	uncharacterized LOC101929011	ncRNA	2.75489
chr1	28623289	28623789	Intergenic	Intergenic	-31974	NM_001127350	54797	Hs.479911	NM_017638	ENSG00000130772	MED18	p28b	mediator complex subunit 18	protein-coding	3.95598
chr14	64876781	64877581	intron (NM_005956, intron 2 of 27)	AluJo|SINE|Alu	22422	NM_005956	4522	Hs.652308	NM_005956	ENSG00000100714	MTHFD1	MTHFC|MTHFD	methylenetetrahydrofolate dehydrogenase, cyclohydrolase and formyltetrahydrofolate synthetase 1	protein-coding	2.51217
chr7	36479139	36479639	intron (NM_001284302, intron 20 of 22)	intron (NM_001284302, intron 20 of 22)	-49655	NM_001100425	23366	Hs.6224	NM_015314	ENSG00000164542	KIAA0895	-	KIAA0895	protein-coding	4.54955
chr9	77418214	77418714	intron (NM_001177310, intron 15 of 38)	intron (NM_001177310, intron 15 of 38)	83799	NM_001177311	140803	Hs.272225	NM_017662	ENSG00000119121	TRPM6	CHAK2|HMGX|HOMG|HOMG1|HSH	transient receptor potential cation channel subfamily M member 6	protein-coding	3.73993
chr15	68135999	68136499	Intergenic	Intergenic	-3866	NR_125730	103625684		NR_125730	ENSG00000207357	RNU6-2	U6-2	RNA, U6 small nuclear 2	snRNA	4.06936
chr22	37914477	37914977	intron (NM_014550, intron 1 of 19)	intron (NM_014550, intron 1 of 19)	483	NM_014550	29775	Hs.57973	NM_014550	ENSG00000100065	CARD10	BIMP1|CARMA3	caspase recruitment domain family member 10	protein-coding	2.72915
chr5	154403598	154404098	Intergenic	MLT1H|LTR|ERVL-MaLR	10533	NM_001099293	285643	Hs.567824	NM_001099293	ENSG00000226650	KIF4B	-	kinesin family member 4B	protein-coding	3.93136
chr7	155082683	155083183	Intergenic	L2|LINE|L2	-6549	NM_001346590	3638	Hs.520819	NM_005542	ENSG00000186480	INSIG1	CL6	insulin induced gene 1	protein-coding	2.4109
chr22	40404627	40405127	intron (NM_138435, intron 1 of 4)	intron (NM_138435, intron 1 of 4)	13924	NM_138435	113828	Hs.197680	NM_138435	ENSG00000133477	FAM83F	-	family with sequence similarity 83 member F	protein-coding	2.77956
chr5	172628602	172629294	Intergenic	Intergenic	33367	NM_001166175	1482	Hs.54473	NM_004387	ENSG00000183072	NKX2-5	CHNG5|CSX|CSX1|HLHS2|NKX2.5|NKX2E|NKX4-1|VSD3	NK2 homeobox 5	protein-coding	3.68311
chr3	107725043	107725543	Intergenic	Intergenic	84642	NM_198793	961	Hs.446414	NM_001777	ENSG00000196776	CD47	IAP|MER6|OA3	CD47 molecule	protein-coding	3.02032
chr10	75725009	75725509	Intergenic	AluSx|SINE|Alu	-32613	NM_003373	7414	Hs.643896	NM_003373	ENSG00000035403	VCL	CMD1W|CMH15|HEL114|MV|MVCL	vinculin	protein-coding	3.50679
chr11	44730266	44731190	Intergenic	Intergenic	-55248	NM_130783	90139	Hs.385634	NM_130783	ENSG00000157570	TSPAN18	TSPAN	tetraspanin 18	protein-coding	2.57682
chr6	137568808	137569308	Intergenic	Intergenic	-28491	NM_000416	3459	Hs.520414	NM_000416	ENSG00000027697	IFNGR1	CD119|IFNGR|IMD27A|IMD27B	interferon gamma receptor 1	protein-coding	inf
chr9	38443144	38444119	Intergenic	MER112|DNA|hAT-Charlie	-19188	NM_001007563	347252	Hs.349705	NM_001007563	ENSG00000137142	IGFBPL1	IGFBP-RP4|IGFBPRP4|bA113O24.1	insulin like growth factor binding protein like 1	protein-coding	2.79906
chr5	171492535	171493035	intron (NM_005990, intron 12 of 18)	MLT1K|LTR|ERVL-MaLR	-58908	NM_033645	23291	Hs.484138	NM_012300	ENSG00000072803	FBXW11	BTRC2|BTRCP2|FBW1B|FBXW1B|Fbw11|Hos	F-box and WD repeat domain containing 11	protein-coding	3.14668
chr20	2012728	2013228	Intergenic	Intergenic	-38047	NM_024411	5173	Hs.22584	NM_024411	ENSG00000101327	PDYN	ADCA|PENKB|SCA23	prodynorphin	protein-coding	2.35657
chr1	61635945	61636445	intron (NM_001145511, intron 2 of 10)	intron (NM_001145511, intron 2 of 10)	82995	NR_104180	645030	Hs.632410	NR_104180	ENSG00000237853	NFIA-AS1	-	NFIA antisense RNA 1	ncRNA	4.25629
chr11	32102539	32103039	Intergenic	MLT1H|LTR|ERVL-MaLR	-9688	NM_002901	5954	Hs.97887	NM_002901	ENSG00000049449	RCN1	HEL-S-84|PIG20|RCAL|RCN	reticulocalbin 1	protein-coding	3.97823
chr16	25017734	25018234	intron (NM_018054, intron 1 of 18)	MER58A|DNA|hAT-Charlie	8715	NM_001006634	55114	Hs.373793	NM_018054	ENSG00000140750	ARHGAP17	MST066|MST110|MSTP038|MSTP066|MSTP110|NADRIN|PP367|PP4534|RICH-1|RICH1|WBP15	Rho GTPase activating protein 17	protein-coding	3.57043
chr10	52271187	52272024	intron (NM_147156, intron 3 of 10)	X7A_LINE|LINE|CR1	112131	NM_147156	259230	Hs.654698	NM_147156	ENSG00000198964	SGMS1	MOB|MOB1|SMS1|TMEM23|hmob33	sphingomyelin synthase 1	protein-coding	2.44895
chr19	6744274	6745368	exon (NM_001288962, exon 9 of 15)	exon (NM_001288962, exon 9 of 15)	5128	NR_110231	9322	Hs.515094	NM_004240	ENSG00000125733	TRIP10	CIP4|HSTP|STOT|STP|TRIP-10	thyroid hormone receptor interactor 10	protein-coding	2.81028
chr2	101972093	101972593	intron (NM_153836, intron 2 of 3)	LTR1C|LTR|ERV1	31622	NM_153836	200407	Hs.732289	NM_153836	ENSG00000175874	CREG2	-	cellular repressor of E1A stimulated genes 2	protein-coding	3.84799
chr20	35212333	35212833	intron (NM_001199535, intron 2 of 4)	intron (NM_001199535, intron 2 of 4)	9626	NM_001199515	60436	Hs.632264	NM_021809	ENSG00000118707	TGIF2	-	TGFB induced factor homeobox 2	protein-coding	4.80989
chr5	96050504	96051004	intron (NM_173060, intron 1 of 28)	intron (NM_173060, intron 1 of 28)	12390	NM_001042444	831	Hs.436186	NM_001750	ENSG00000153113	CAST	BS-17|PLACK	calpastatin	protein-coding	3.30157
chr17	40681781	40682281	Intergenic	AluSz|SINE|Alu	-5920	NM_000263	4669	Hs.50727	NM_000263	ENSG00000108784	NAGLU	CMT2V|MPS-IIIB|MPS3B|NAG|UFHSD	N-acetyl-alpha-glucosaminidase	protein-coding	3.58423
chr19	2059819	2060319	Intergenic	Intergenic	-8826	NM_017572	2872	Hs.515032	NM_017572	ENSG00000099875	MKNK2	GPRK7|MNK2	MAP kinase interacting serine/threonine kinase 2	protein-coding	3.0107
chr2	101736983	101737483	intron (NR_138475, intron 1 of 18)	intron (NR_138475, intron 1 of 18)	30676	NM_001102426	11138	Hs.442657	NM_007063	ENSG00000204634	TBC1D8	AD3|GRAMD8|HBLP1|TBC1D8A|VRP	TBC1 domain family member 8	protein-coding	3.78287
chr11	63655796	63656529	5' UTR (NM_017490, exon 1 of 18)	5' UTR (NM_017490, exon 1 of 18)	176	NM_017490	2011	Hs.567261	NM_004954	ENSG00000072518	MARK2	EMK-1|EMK1|PAR-1|Par-1b|Par1b	microtubule affinity regulating kinase 2	protein-coding	2.73876
chr11	15074623	15075389	Intergenic	Intergenic	-20140	NM_000728	797	Hs.534305	NM_000728	ENSG00000175868	CALCB	CALC2|CGRP-II|CGRP2	calcitonin related polypeptide beta	protein-coding	3.35909
chr20	50359244	50359963	intron (NM_006045, intron 1 of 27)	intron (NM_006045, intron 1 of 27)	25346	NM_006045	10079	Hs.649234	NM_006045	ENSG00000054793	ATP9A	ATPIIA	ATPase phospholipid transporting 9A (putative)	protein-coding	2.51987
chr20	33914899	33915623	intron (NM_001184977, intron 5 of 7)	MIRc|SINE|MIR	-35036	NM_178468	128876	Hs.592149	NM_178468	ENSG00000125998	FAM83C	C20orf128|dJ614O4.7	family with sequence similarity 83 member C	protein-coding	2.58986
chr17	73868947	73869447	Intergenic	Intergenic	5459	NM_033452	91107	Hs.293660	NM_033452	ENSG00000132481	TRIM47	GOA|RNF100	tripartite motif containing 47	protein-coding	2.69015
chr6	144059390	144059890	intron (NM_001100165, intron 2 of 11)	AluJb|SINE|Alu	60538	NM_001100165	9749	Hs.102471	NM_014721	ENSG00000112419	PHACTR2	C6orf56	phosphatase and actin regulator 2	protein-coding	3.25181
chr2	65772964	65773464	Intergenic	L2b|LINE|L2	-113558	NM_181784	200734	Hs.59332	NM_181784	ENSG00000198369	SPRED2	Spred-2	sprouty related EVH1 domain containing 2	protein-coding	2.95532
chr1	171429258	171429758	Intergenic	Intergenic	-25158	NM_015172	23215	Hs.494614	NM_015172	ENSG00000117523	PRRC2C	BAT2-iso|BAT2D1|BAT2L2|XTP2	proline rich coiled-coil 2C	protein-coding	3.60955
chr8	122782474	122782974	Intergenic	L2b|LINE|L2	-129094	NM_005328	3037	Hs.159226	NM_005328	ENSG00000170961	HAS2	-	hyaluronan synthase 2	protein-coding	3.64015
chr21	37574479	37574979	intron (NM_005128, intron 4 of 36)	intron (NM_005128, intron 4 of 36)	37890	NM_005128	9980	Hs.204575	NM_005128	ENSG00000142197	DOPEY2	21orf5|C21orf5	dopey family member 2	protein-coding	4.53221
chr15	100752272	100752772	intron (NM_139057, intron 7 of 21)	intron (NM_139057, intron 7 of 21)	129688	NM_139057	170691	Hs.513200	NM_139057	ENSG00000140470	ADAMTS17	-	ADAM metallopeptidase with thrombospondin type 1 motif 17	protein-coding	3.0586
chr20	55154287	55154787	non-coding (NR_136537, exon 3 of 6)	non-coding (NR_136537, exon 3 of 6)	1918	NR_136537	105372682	Hs.517135	NR_136537	ENSG00000225657	LINC01716	-	long intergenic non-protein coding RNA 1716	ncRNA	5.21619
chr15	63766273	63766773	Intergenic	Intergenic	-30187	NR_046341	9960	Hs.458499	NM_006537	ENSG00000140455	USP3	SIH003|UBP	ubiquitin specific peptidase 3	protein-coding	2.86697
chr14	22859046	22859990	Intergenic	Intergenic	198625	NM_001344	1603	Hs.82890	NM_001344	ENSG00000129562	DAD1	OST2	defender against cell death 1	protein-coding	4.03137
chr12	91406	91906	TTS (NR_130745)	TTS (NR_130745)	17931	NR_130745	100288778	Hs.459573	NR_130745	ENSG00000226210	LOC100288778	-	WAS protein family homolog 1 pseudogene	pseudo	3.12909
chr3	190103689	190104529	Intergenic	Intergenic	-1552	NM_006580	10686	Hs.251391	NM_006580	ENSG00000113946	CLDN16	HOMG3|PCLN1	claudin 16	protein-coding	2.53548
chr12	127769479	127770134	Intergenic	Intergenic	54810	NR_110057	101927616	Hs.637827	NR_110057	ENSG00000256362	LOC101927616	-	uncharacterized LOC101927616	ncRNA	4.00615
chrX	153769172	153769672	intron (NM_001042351, intron 2 of 12)	intron (NM_001042351, intron 2 of 12)	-1033	NM_001321396	8517	Hs.43505	NM_003639	ENSG00000269335	IKBKG	AMCBX1|FIP-3|FIP3|Fip3p|IKK-gamma|IKKAP1|IKKG|IMD33|IP|IP1|IP2|IPD2|NEMO|ZC2HC9	inhibitor of kappa light polypeptide gene enhancer in B-cells, kinase gamma	protein-coding	3.22545
chr15	86975967	86976467	intron (NM_152336, intron 18 of 24)	intron (NM_152336, intron 18 of 24)	-116018	NR_046012	727915	Hs.451281	NR_046012	ENSG00000260125	AGBL1-AS1	-	AGBL1 antisense RNA 1	ncRNA	6.03824
chr20	46558119	46558619	Intergenic	Intergenic	-53601	NR_109942	101060004	Hs.129970	NR_109942		LINC01523	-	long intergenic non-protein coding RNA 1523	ncRNA	3.42271
chr17	43308102	43308602	intron (NM_005892, intron 2 of 26)	intron (NM_005892, intron 2 of 26)	9060	NM_005892	752	Hs.100217	NM_005892	ENSG00000184922	FMNL1	C17orf1|C17orf1B|FHOD4|FMNL|KW-13	formin like 1	protein-coding	4.98872
chr21	37809642	37810471	Intergenic	AluSq2|SINE|Alu	28682	NM_012130	23562	Hs.660278	NM_012130	ENSG00000159261	CLDN14	DFNB29	claudin 14	protein-coding	2.33162
chrY	14465804	14466304	Intergenic	Intergenic	67335	NR_033667	352887	Hs.546221	NR_033667	ENSG00000206159	GYG2P1	GYG2P	glycogenin 2 pseudogene 1	pseudo	4.39265
chr8	103743149	103743649	Intergenic	L2a|LINE|L2	-75269	NM_005655	7071	Hs.435001	NM_005655	ENSG00000155090	KLF10	EGR-alpha|EGRA|TIEG|TIEG1	Kruppel like factor 10	protein-coding	2.41447
chr8	40457909	40458409	intron (NM_001135731, intron 4 of 5)	intron (NM_001135731, intron 4 of 5)	297184	NM_024645	79698	Hs.591850	NM_024645	ENSG00000165061	ZMAT4	-	zinc finger matrin-type 4	protein-coding	3.036
chr1	117079926	117080426	intron (NR_026665, intron 2 of 5)	intron (NR_026665, intron 2 of 5)	33539	NR_026665	965	Hs.34341	NM_001779	ENSG00000116815	CD58	LFA-3|LFA3|ag3	CD58 molecule	protein-coding	2.45246
chr22	27442062	27442562	Intergenic	Intergenic	14168	NM_001318329	284898	Hs.350813	NM_001318329		LOC284898	-	uncharacterized LOC284898	protein-coding	2.41792
chr1	34451951	34452451	intron (NM_001281956, intron 3 of 70)	intron (NM_001281956, intron 3 of 70)	117644	NR_038372	402779	Hs.666207	NR_038372	ENSG00000231163	CSMD2-AS1	-	CSMD2 antisense RNA 1	ncRNA	2.88431
chr7	30725638	30726138	intron (NM_001202475, intron 2 of 12)	intron (NM_001202475, intron 2 of 12)	-3747	NM_001202483	1395	Hs.546246	NM_001883	ENSG00000106113	CRHR2	CRF-RB|CRF2|CRFR2|HM-CRF	corticotropin releasing hormone receptor 2	protein-coding	4.40221
chr1	202081879	202082379	Intergenic	Intergenic	-9900	NM_004767	9283	Hs.132049	NM_004767	ENSG00000170075	GPR37L1	ET(B)R-LP-2|ETBR-LP-2	G protein-coupled receptor 37 like 1	protein-coding	3.42495
chr1	23585241	23585741	Intergenic	AluJb|SINE|Alu	26520	NR_110616	100996511	Hs.99836	NR_110616		LINC01355	-	long intergenic non-protein coding RNA 1355	ncRNA	2.42419
chr20	38544824	38545324	Intergenic	Intergenic	-88029	NR_109936	100505663	Hs.559348	NR_109936	ENSG00000237767	LINC01370	HI-LNC25|HILNC25	long intergenic non-protein coding RNA 1370	ncRNA	3.85939
chr16	54381822	54382322	Intergenic	AluJr|SINE|Alu	22298	NR_134922	100996345	Hs.112680	NR_134922	ENSG00000261803	LINC02140	-	long intergenic non-protein coding RNA 2140	ncRNA	3.96098
chr5	39015861	39016361	intron (NM_152756, intron 3 of 37)	Tigger15a|DNA|TcMar-Tigger	58399	NM_001285440	253260	Hs.407926	NM_152756	ENSG00000164327	RICTOR	AVO3|PIA|hAVO3	RPTOR independent companion of MTOR complex 2	protein-coding	3.08265
chr5	133562467	133562967	promoter-TSS (NM_002715)	promoter-TSS (NM_002715)	-767	NM_002715	5515	Hs.105818	NM_002715	ENSG00000113575	PPP2CA	PP2Ac|PP2CA|PP2Calpha|RP-C	protein phosphatase 2 catalytic subunit alpha	protein-coding	2.45311
chr8	68623030	68623530	intron (NM_020361, intron 1 of 10)	intron (NM_020361, intron 1 of 10)	35340	NM_020361	57094	Hs.658850	NM_020361	ENSG00000165078	CPA6	CPAH|ETL5|FEB11	carboxypeptidase A6	protein-coding	5.26276
chr10	105208441	105208941	intron (NR_024552, intron 3 of 3)	intron (NR_024552, intron 3 of 3)	3471	NR_024552	51063	Hs.241545	NM_015916	ENSG00000138172	CALHM2	FAM26B	calcium homeostasis modulator 2	protein-coding	2.3559
chr17	33047685	33048185	Intergenic	Intergenic	140167	NM_001304438	124842	Hs.310482	NM_207313	ENSG00000181291	TMEM132E	DFNB99	transmembrane protein 132E	protein-coding	3.29905
chr16	67487777	67488277	intron (NM_004691, intron 1 of 7)	intron (NM_004691, intron 1 of 7)	22991	NM_000196	3291	Hs.1376	NM_000196	ENSG00000176387	HSD11B2	AME|AME1|HSD11K|HSD2|SDR9C3	hydroxysteroid 11-beta dehydrogenase 2	protein-coding	4.66935
chr11	128603536	128604036	intron (NM_002017, intron 1 of 8)	intron (NM_002017, intron 1 of 8)	-37868	NR_038908	100507392	Hs.657715	NR_038908	ENSG00000254703	SENCR	FLI1-AS1|lncRNA9	smooth muscle and endothelial cell enriched migration/differentiation-associated long non-coding RNA	ncRNA	4.04437
chr14	68465468	68466431	intron (NM_001321809, intron 7 of 11)	L1MEc|LINE|L1	175641	NM_001321815	5890	Hs.172587	NM_002877	ENSG00000182185	RAD51B	R51H2|RAD51L1|REC2	RAD51 paralog B	protein-coding	4.97322
chr3	32433107	32433996	exon (NM_181472, exon 1 of 4)	exon (NM_181472, exon 1 of 4)	389	NM_181472	112616	Hs.440494	NM_138410	ENSG00000153551	CMTM7	CKLFSF7	CKLF like MARVEL transmembrane domain containing 7	protein-coding	2.9266
chr6	159260791	159261291	Intergenic	Intergenic	17623	NR_028496	202459	Hs.487035	NM_145303	ENSG00000243775	OSTCP1	DC2L|OSTCL	oligosaccharyltransferase complex subunit pseudogene 1	pseudo	3.62027
chrX	8836070	8836938	Intergenic	Intergenic	-67080	NM_174951	171482	Hs.382062	NM_174951	ENSG00000183304	FAM9A	TEX39A	family with sequence similarity 9 member A	protein-coding	2.33978
chr19	34300783	34301283	intron (NM_024076, intron 5 of 6)	intron (NM_024076, intron 5 of 6)	13282	NM_024076	79047	Hs.221873	NM_024076	ENSG00000153885	KCTD15	-	potassium channel tetramerization domain containing 15	protein-coding	3.69161
chr10	72459418	72459918	intron (NM_080722, intron 2 of 21)	intron (NM_080722, intron 2 of 21)	27406	NM_080722	140766	Hs.352156	NM_080722	ENSG00000138316	ADAMTS14	-	ADAM metallopeptidase with thrombospondin type 1 motif 14	protein-coding	3.80072
chr12	69401266	69401766	Intergenic	Intergenic	-44496	NM_001874	1368	Hs.654387	NM_001874	ENSG00000135678	CPM	-	carboxypeptidase M	protein-coding	3.06054
chr17	73992817	73993317	intron (NR_037709, intron 3 of 9)	intron (NR_037709, intron 3 of 9)	-3920	NM_001258	1018	Hs.706766	NM_001258	ENSG00000250506	CDK3	-	cyclin dependent kinase 3	protein-coding	4.7602
chr20	58173307	58174009	intron (NM_001199505, intron 1 of 12)	intron (NM_001199505, intron 1 of 12)	-5944	NM_080672	116154	Hs.473218	NM_080672	ENSG00000087495	PHACTR3	C20orf101|H17739|PPP1R123|SCAPIN1|SCAPININ	phosphatase and actin regulator 3	protein-coding	3.33518
chr5	14208157	14209123	intron (NM_007118, intron 1 of 56)	L1ME1|LINE|L1	64829	NM_007118	7204	Hs.130031	NM_007118	ENSG00000038382	TRIO	ARHGEF23|MEBAS|MRD44|tgat	trio Rho guanine nucleotide exchange factor	protein-coding	2.39877
chr5	892484	893649	promoter-TSS (NM_001166260)	promoter-TSS (NM_001166260)	98	NM_004237	9319	Hs.436187	NM_004237	ENSG00000071539	TRIP13	16E1BP	thyroid hormone receptor interactor 13	protein-coding	2.52791
chr12	124770804	124771304	intron (NM_001204299, intron 3 of 4)	intron (NM_001204299, intron 3 of 4)	-2656	NM_181709	144347	Hs.432901	NM_181709	ENSG00000178882	RFLNA	CFM2|FAM101A	refilin A	protein-coding	3.62868
chr1	160095334	160096002	intron (NM_000702, intron 7 of 22)	intron (NM_000702, intron 7 of 22)	10148	NM_000702	477	Hs.34114	NM_000702	ENSG00000018625	ATP1A2	FHM2|MHP2	ATPase Na+/K+ transporting subunit alpha 2	protein-coding	3.40617
chr20	56135793	56136293	promoter-TSS (NM_002591)	promoter-TSS (NM_002591)	-94	NM_002591	5105	Hs.1872	NM_002591	ENSG00000124253	PCK1	PEPCK-C|PEPCK1|PEPCKC	phosphoenolpyruvate carboxykinase 1	protein-coding	4.17675
chr7	132201142	132201642	intron (NM_181775, intron 2 of 4)	L2b|LINE|L2	59931	NM_020911	91584	Hs.511454	NM_020911	ENSG00000221866	PLXNA4	FAYV2820|PLEXA4|PLXNA4A|PLXNA4B|PRO34003	plexin A4	protein-coding	3.1076
chr11	60779832	60780332	intron (NM_001254751, intron 6 of 10)	intron (NM_001254751, intron 6 of 10)	40969	NM_001254750	923	Hs.744366	NM_006725	ENSG00000013725	CD6	TP120	CD6 molecule	protein-coding	2.44457
chr5	110120990	110121490	Intergenic	Intergenic	46567	NM_138773	91137	Hs.75639	NM_138773	ENSG00000164209	SLC25A46	HMSN6B	solute carrier family 25 member 46	protein-coding	4.38901
chr2	180137029	180137529	Intergenic	Intergenic	-7929	NM_178123	91404	Hs.30977	NM_178123	ENSG00000187231	SESTD1	SOLO	SEC14 and spectrin domain containing 1	protein-coding	2.55977
chr8	28506130	28506630	Intergenic	FLAM_A|SINE|Alu	52601	NR_126027	101929402	Hs.667366	NR_126027	ENSG00000246339	EXTL3-AS1	C8orf50	EXTL3 antisense RNA 1	ncRNA	4.10676
chr11	59624749	59625249	intron (NM_001062, intron 5 of 8)	L2c|LINE|L2	9042	NM_001062	6947	Hs.2012	NM_001062	ENSG00000134827	TCN1	HC|TC-1|TC1|TCI	transcobalamin 1	protein-coding	2.349
chr21	33814875	33815672	intron (NM_001320744, intron 1 of 5)	(GGGA)n|Simple_repeat|Simple_repeat	30529	NR_104472	59271	Hs.208358	NM_058187	ENSG00000166979	EVA1C	B18|B19|C21orf63|C21orf64|FAM176C|PRED34|SUE21	eva-1 homolog C	protein-coding	2.36087
chrX	8816887	8817925	Intergenic	AluJo|SINE|Alu	-47982	NM_174951	171482	Hs.382062	NM_174951	ENSG00000183304	FAM9A	TEX39A	family with sequence similarity 9 member A	protein-coding	3.04803
chr6	45682411	45683362	Intergenic	Intergenic	222447	NR_045674	53405	Hs.485489	NM_016929	ENSG00000112782	CLIC5	DFNB102|DFNB103|MST130|MSTP130	chloride intracellular channel 5	protein-coding	3.01944
chr12	113199328	113199828	intron (NM_001347952, intron 1 of 21)	intron (NM_001347952, intron 1 of 21)	-29765	NM_001347953	22895	Hs.21239	NM_014954	ENSG00000089169	RPH3A	-	rabphilin 3A	protein-coding	4.81075
chr1	244493239	244493739	Intergenic	MER21B|LTR|ERVL	-22448	NM_001276349	200159	Hs.442703	NM_001012970	ENSG00000173728	C1orf100	-	chromosome 1 open reading frame 100	protein-coding	2.98421
chr17	36769423	36769923	Intergenic	Intergenic	-7490	NM_025248	80725	Hs.448872	NM_025248	ENSG00000277363	SRCIN1	P140|SNIP	SRC kinase signaling inhibitor 1	protein-coding	3.70751
chr7	43801427	43801927	intron (NM_001253823, intron 2 of 8)	intron (NM_001253823, intron 2 of 8)	3405	NM_001253823	644	Hs.488143	NM_000712	ENSG00000106605	BLVRA	BLVR|BVR|BVRA	biliverdin reductase A	protein-coding	4.93158
chr14	59333162	59333662	intron (NR_110547, intron 1 of 5)	L2b|LINE|L2	38406	NR_110547	102723742	Hs.232734	NR_110547	ENSG00000258583	LINC01500	-	long intergenic non-protein coding RNA 1500	ncRNA	3.0315
chr2	183237291	183237791	intron (NM_001003683, intron 2 of 14)	intron (NM_001003683, intron 2 of 14)	54234	NM_001258313	5136	Hs.191046	NM_005019	ENSG00000115252	PDE1A	CAM-PDE-1A|HCAM-1|HCAM1|HSPDE1A	phosphodiesterase 1A	protein-coding	2.57893
chr1	33181386	33181886	Intergenic	Intergenic	-13275	NM_030786	81493	Hs.712631	NM_030786	ENSG00000162520	SYNC	SYNC1|SYNCOILIN	syncoilin, intermediate filament protein	protein-coding	3.91952
chr22	39862624	39863124	intron (NM_002409, intron 1 of 1)	intron (NM_002409, intron 1 of 1)	9549	NM_002409	4248	Hs.276808	NM_002409	ENSG00000128268	MGAT3	GNT-III|GNT3	mannosyl (beta-1,4-)-glycoprotein beta-1,4-N-acetylglucosaminyltransferase	protein-coding	4.28918
chr16	56691257	56691935	promoter-TSS (NM_001301272)	promoter-TSS (NM_001301272)	-259	NM_001301272	4494	Hs.513626	NM_005949	ENSG00000198417	MT1F	MT1	metallothionein 1F	protein-coding	2.74232
chr9	90326640	90327140	Intergenic	Intergenic	-14084	NM_001257973	1514	Hs.731507	NM_001912	ENSG00000135047	CTSL	CATL|CTSL1|MEP	cathepsin L	protein-coding	2.57324
chr1	235574995	235575495	intron (NM_001079515, intron 3 of 16)	L2|LINE|L2	44570	NM_001079515	6905	Hs.744998	NM_003193	ENSG00000116957	TBCE	HRD|KCS|KCS1|PEAMO|pac2	tubulin folding cofactor E	protein-coding	3.50864
chr7	26198819	26199319	intron (NM_004289, intron 1 of 3)	intron (NM_004289, intron 1 of 3)	7222	NM_004289	9603	Hs.404741	NM_004289	ENSG00000050344	NFE2L3	NRF3	nuclear factor, erythroid 2 like 3	protein-coding	2.63769
chr10	95984382	95984882	intron (NM_016341, intron 4 of 32)	intron (NM_016341, intron 4 of 32)	62195	NR_033969	100128054	Hs.677562	NR_033969	ENSG00000268894	PLCE1-AS1	-	PLCE1 antisense RNA 1	ncRNA	2.90732
chr21	36986904	36987404	Intergenic	LTR40b|LTR|ERVL	-34092	NR_073512	100506403	Hs.536609	NR_073512	ENSG00000159216	LOC100506403	-	uncharacterized LOC100506403	ncRNA	3.77457
chr5	151101533	151102033	Intergenic	MLT1J|LTR|ERVL-MaLR	-35168	NM_001309444	6678	Hs.111779	NM_003118	ENSG00000113140	SPARC	BM-40|OI17|ON	secreted protein acidic and cysteine rich	protein-coding	2.5449
chrX	139122435	139123039	Intergenic	L1M1|LINE|L1	-51089	NM_001271560	389895	Hs.127679	NM_001271560		LOC389895	-	chromosome 16 open reading frame 72-like	protein-coding	3.53994
chr2	139411962	139412462	Intergenic	L2a|LINE|L2	125599	NM_007226	11249	Hs.435019	NM_007226	ENSG00000144227	NXPH2	NPH2	neurexophilin 2	protein-coding	5.04139
chr19	41664928	41665428	Intergenic	MER77|LTR|ERVL	-33934	NM_030622	29785	Hs.98370	NM_030622	ENSG00000167600	CYP2S1	CYPIIS1	cytochrome P450 family 2 subfamily S member 1	protein-coding	3.52005
chr17	74546869	74547369	Intergenic	MIRb|SINE|MIR	-6727	NR_038111	100507246	Hs.288215	NR_038108	ENSG00000163597	SNHG16	Nbla10727|Nbla12061|ncRAN	small nucleolar RNA host gene 16	ncRNA	3.89579
chr6	10453775	10454275	intron (NR_132993, intron 3 of 3)	intron (NR_132993, intron 3 of 3)	14075	NR_049872	100846998		NR_049872	ENSG00000263705	MIR5689	-	microRNA 5689	ncRNA	3.62452
chrY	14331211	14331711	Intergenic	Intergenic	201928	NR_033667	352887	Hs.546221	NR_033667	ENSG00000206159	GYG2P1	GYG2P	glycogenin 2 pseudogene 1	pseudo	4.05908
chr11	102200862	102201362	intron (NM_182962, intron 6 of 9)	intron (NM_182962, intron 6 of 9)	12931	NM_001165	330	Hs.127799	NM_001165	ENSG00000023445	BIRC3	AIP1|API2|CIAP2|HAIP1|HIAP1|MALT2|MIHC|RNF49|c-IAP2	baculoviral IAP repeat containing 3	protein-coding	4.11588
chr2	208744152	208744652	intron (NM_001080475, intron 6 of 7)	intron (NM_001080475, intron 6 of 7)	-110259	NM_003468	7855	Hs.17631	NM_003468	ENSG00000163251	FZD5	C2orf31|HFZ5	frizzled class receptor 5	protein-coding	4.02034
chr17	19622510	19623010	promoter-TSS (NR_135624)	promoter-TSS (NR_135624)	-468	NR_135624	146802	Hs.126830	NM_152908	ENSG00000180638	SLC47A2	MATE2|MATE2-B|MATE2-K|MATE2K	solute carrier family 47 member 2	protein-coding	2.32277
chr20	34732216	34732716	intron (NM_001258330, intron 3 of 20)	intron (NM_001258330, intron 3 of 20)	-10196	NM_012156	2036	Hs.437422	NM_012156	ENSG00000088367	EPB41L1	4.1N|MRD11	erythrocyte membrane protein band 4.1 like 1	protein-coding	3.04438
chr10	129835321	129835821	intron (NM_001323354, intron 1 of 19)	intron (NM_001323354, intron 1 of 19)	-10242	NM_130435	5791	Hs.127022	NM_006504	ENSG00000132334	PTPRE	HPTPE|PTPE|R-PTP-EPSILON	protein tyrosine phosphatase, receptor type E	protein-coding	3.54371
chr9	98143471	98143971	Intergenic	Intergenic	-63730	NM_001243744	2176	Hs.494529	NM_000136	ENSG00000158169	FANCC	FA3|FAC|FACC	Fanconi anemia complementation group C	protein-coding	2.40371
chr22	26985093	26985593	intron (NM_003595, intron 1 of 6)	intron (NM_003595, intron 1 of 6)	746	NM_003595	8459	Hs.632768	NM_003595	ENSG00000128294	TPST2	TANGO13B	tyrosylprotein sulfotransferase 2	protein-coding	2.91202
chr1	17525302	17526003	Intergenic	Intergenic	-5968	NM_013358	29943	Hs.412941	NM_013358	ENSG00000142623	PADI1	HPAD10|PAD1|PDI|PDI1	peptidyl arginine deiminase 1	protein-coding	3.93094
chr1	53555081	53555581	intron (NR_109858, intron 9 of 10)	intron (NR_109858, intron 9 of 10)	27607	NM_001199081	127435	Hs.586141	NM_153703	ENSG00000174348	PODN	PCAN|SLRR5A	podocan	protein-coding	4.12287
chr9	138261139	138261639	Intergenic	Intergenic	26294	NM_173520	157927	Hs.559511	NM_173520		C9orf62	-	chromosome 9 open reading frame 62	protein-coding	2.54173
chr6	43552743	43553243	intron (NM_001291969, intron 2 of 8)	MER21B|LTR|ERVL	9115	NM_006502	5429	Hs.655467	NM_006502	ENSG00000170734	POLH	RAD30|RAD30A|XP-V|XPV	DNA polymerase eta	protein-coding	3.0343
chr6	18382567	18383067	Intergenic	AluSz|SINE|Alu	-4764	NM_182757	255488	Hs.148741	NM_182757	ENSG00000137393	RNF144B	IBRDC2|PIR2|bA528A10.3|p53RFP	ring finger protein 144B	protein-coding	2.40537
chr3	124388277	124388777	intron (NM_001024660, intron 47 of 59)	MER2|DNA|TcMar-Tigger	-60686	NM_000373	7372	Hs.2057	NM_000373	ENSG00000114491	UMPS	OPRT	uridine monophosphate synthetase	protein-coding	2.50287
chr12	2277906	2278406	intron (NM_001129830, intron 3 of 47)	intron (NM_001129830, intron 3 of 47)	54491	NR_046578	100874234	Hs.372570	NR_046578	ENSG00000256025	CACNA1C-AS4	-	CACNA1C antisense RNA 4	ncRNA	2.36783
chr1	17563529	17564242	exon (NM_013358, exon 12 of 16)	exon (NM_013358, exon 12 of 16)	-11707	NM_016233	51702	Hs.149195	NM_016233	ENSG00000142619	PADI3	PAD3|PDI3	peptidyl arginine deiminase 3	protein-coding	2.89335
chr15	89279468	89279968	Intergenic	Intergenic	-66956	NM_001135	176	Hs.2159	NM_001135	ENSG00000157766	ACAN	AGC1|AGCAN|CSPG1|CSPGCP|MSK16|SEDK	aggrecan	protein-coding	3.45376
chr17	17484004	17484504	intron (NM_001267551, intron 1 of 6)	intron (NM_001267551, intron 1 of 6)	1491	NM_007169	10400	Hs.714193	NM_007169	ENSG00000133027	PEMT	PEAMT|PEMPT|PEMT2|PLMT|PNMT	phosphatidylethanolamine N-methyltransferase	protein-coding	5.34424
chr1	9299646	9300146	promoter-TSS (NM_001282587)	promoter-TSS (NM_001282587)	-7	NM_001282587	9563	Hs.463511	NM_004285	ENSG00000049239	H6PD	CORTRD1|G6PDH|GDH	hexose-6-phosphate dehydrogenase/glucose 1-dehydrogenase	protein-coding	2.46872
chr1	228918575	228919075	Intergenic	Intergenic	48001	NM_021205	58480	Hs.647774	NM_021205	ENSG00000116574	RHOU	ARHU|CDC42L1|G28K|WRCH1|hG28K	ras homolog family member U	protein-coding	3.22728
chr14	70125337	70125949	intron (NM_014734, intron 2 of 5)	intron (NM_014734, intron 2 of 5)	47333	NM_014734	9766	Hs.440025	NM_014734	ENSG00000100647	SUSD6	DRAGO|KIAA0247	sushi domain containing 6	protein-coding	4.12987
chr1	17407803	17408303	intron (NM_007365, intron 10 of 15)	intron (NM_007365, intron 10 of 15)	-27388	NM_003000	6390	Hs.465924	NM_003000	ENSG00000117118	SDHB	CWS2|IP|PGL4|SDH|SDH1|SDH2|SDHIP	succinate dehydrogenase complex iron sulfur subunit B	protein-coding	4.18555
chr6	158208061	158208561	Intergenic	MLT2B4|LTR|ERVL	-35892	NM_016224	51429	Hs.191213	NM_016224	ENSG00000130340	SNX9	SDP1|SH3PX1|SH3PXD3A|WISP	sorting nexin 9	protein-coding	3.87577
chr3	188400694	188401194	intron (NM_001167671, intron 6 of 10)	intron (NM_001167671, intron 6 of 10)	-5625	NR_029502	407020		NR_029502	ENSG00000207651	MIR28	MIRN28|hsa-mir-28|miR-28	microRNA 28	ncRNA	3.52154
chr10	123906297	123906869	intron (NM_206862, intron 7 of 22)	L1MC3|LINE|L1	-16358	NM_206860	10579	Hs.501252	NM_006997	ENSG00000138162	TACC2	AZU-1|ECTACC	transforming acidic coiled-coil containing protein 2	protein-coding	2.46738
chr15	44085262	44085762	TTS (NR_031695)	TTS (NR_031695)	445	NR_031695	100302254		NR_031695	ENSG00000221792	MIR1282	MIRN1282|hsa-mir-1282	microRNA 1282	ncRNA	3.67479
chr8	142695577	142696077	Intergenic	Intergenic	171847	NR_031636	100302147		NR_031636	ENSG00000221768	MIR1302-7	MIRN1302-7|hsa-mir-1302-7	microRNA 1302-7	ncRNA	4.16586
chr1	205416781	205417443	TTS (NR_029893)	TTS (NR_029893)	414	NR_029893	442891		NR_029893	ENSG00000199059	MIR135B	MIRN135B|mir-135b	microRNA 135b	ncRNA	2.49428
chr6	13873697	13874500	Intergenic	CpG	-50578	NM_001165034	221687	Hs.111164	NM_152737	ENSG00000180537	RNF182	-	ring finger protein 182	protein-coding	2.72588
chr5	17441392	17441892	non-coding (NR_134275, exon 2 of 2)	non-coding (NR_134275, exon 2 of 2)	-2477	NR_134271	102723526		NR_134270	ENSG00000249662	LOC102723526	-	uncharacterized LOC102723526	ncRNA	3.69495
chr1	48341812	48342312	intron (NM_001194986, intron 2 of 6)	intron (NM_001194986, intron 2 of 6)	120500	NM_001194986	388630	Hs.61504	NM_001194986	ENSG00000269113	TRABD2B	TIKI2	TraB domain containing 2B	protein-coding	3.30536
chr11	128212366	128212866	Intergenic	Intergenic	179589	NM_005238	2113	Hs.369438	NM_005238	ENSG00000134954	ETS1	ETS-1|EWSR2|c-ets-1|p54	ETS proto-oncogene 1, transcription factor	protein-coding	2.78422
chr20	47847169	47847669	intron (NM_017895, intron 9 of 20)	intron (NM_017895, intron 9 of 20)	-11587	NM_001319135	6780	Hs.596704	NM_004602	ENSG00000124214	STAU1	PPP1R150|STAU	staufen double-stranded RNA binding protein 1	protein-coding	2.57503
chr20	48840979	48841479	Intergenic	Intergenic	-32623	NR_125739	101927559	Hs.442486	NR_125739	ENSG00000277449	CEBPB-AS1	-	CEBPB antisense RNA 1	ncRNA	2.35613
chr15	69433659	69434159	intron (NR_031680, intron 3 of 4)	intron (NR_031680, intron 3 of 4)	-19027	NM_015554	26035	Hs.183006	NM_015554	ENSG00000138604	GLCE	HSEPI	glucuronic acid epimerase	protein-coding	2.5522
chr3	139812577	139813339	intron (NM_022131, intron 1 of 16)	intron (NM_022131, intron 1 of 16)	158931	NM_022131	64084	Hs.158529	NM_022131	ENSG00000158258	CLSTN2	ALC-GAMMA|CDHR13|CS2|CSTN2|alcagamma	calsyntenin 2	protein-coding	2.86598
chr15	59846134	59846634	Intergenic	Intergenic	-57598	NM_004751	9245	Hs.194710	NM_004751	ENSG00000140297	GCNT3	C2/4GnT|C24GNT|C2GNT2|C2GNTM|GNTM	glucosaminyl (N-acetyl) transferase 3, mucin type	protein-coding	2.45022
chr18	43772964	43773464	intron (NM_145055, intron 1 of 4)	intron (NM_145055, intron 1 of 4)	19226	NM_145055	147339	Hs.116486	NM_145055	ENSG00000152242	C18orf25	ARKL1|RNF111L1	chromosome 18 open reading frame 25	protein-coding	3.09709
chr6	152128832	152129332	exon (NM_001291230, exon 2 of 9)	exon (NM_001291230, exon 2 of 9)	268	NM_000125	2099	Hs.208124	NM_000125	ENSG00000091831	ESR1	ER|ESR|ESRA|ESTRR|Era|NR3A1	estrogen receptor 1	protein-coding	3.48005
chr22	47689889	47690389	Intergenic	Intergenic	-51182	NR_144462	339685	Hs.434351	NR_038922		LOC339685	-	uncharacterized LOC339685	ncRNA	3.49105
chr3	8667591	8668091	intron (NR_046358, intron 10 of 12)	intron (NR_046358, intron 10 of 12)	18643	NR_046358	51066	Hs.736935	NM_015931	ENSG00000125046	SSUH2	C3orf32|SSU-2|fls485	ssu-2 homolog (C. elegans)	protein-coding	4.4853
chr20	31786698	31787198	intron (NR_026760, intron 2 of 8)	L2a|LINE|L2	5537	NR_026760	317716	Hs.434194	NM_173859	ENSG00000183566	BPIFA4P	BASE	BPI fold containing family A member 4, pseudogene	pseudo	5.05948
chr21	46574508	46575008	intron (NM_001346687, intron 1 of 11)	intron (NM_001346687, intron 1 of 11)	2313	NM_001346687	104	Hs.474018	NM_001112	ENSG00000197381	ADARB1	ADAR2|DRABA2|DRADA2|RED1	adenosine deaminase, RNA specific B1	protein-coding	3.63394
chr5	62348740	62349240	Intergenic	Intergenic	474428	NM_181506	100130733	Hs.721348	NM_181506	ENSG00000186105	LRRC70	SLRN	leucine rich repeat containing 70	protein-coding	inf
chr3	9920359	9920859	promoter-TSS (NM_001199623)	promoter-TSS (NM_001199623)	-113	NM_001199623	63924	Hs.567562	NM_022094	ENSG00000187288	CIDEC	CIDE-3|CIDE3|FPLD5|FSP27	cell death inducing DFFA like effector c	protein-coding	5.18784
chr8	121827373	121827873	Intergenic	MIR3|SINE|MIR	-3314	NM_021021	6641	Hs.46701	NM_021021	ENSG00000172164	SNTB1	59-DAP|A1B|BSYN2|DAPA1B|SNT2|SNT2B1|TIP-43	syntrophin beta 1	protein-coding	4.68896
chr1	115059907	115060407	Intergenic	MER77|LTR|ERVL	-6376	NM_033020	51592	Hs.26837	NM_015906	ENSG00000197323	TRIM33	ECTO|PTC7|RFG7|TF1G|TIF1G|TIF1GAMMA|TIFGAMMA	tripartite motif containing 33	protein-coding	3.27956
chr4	113473766	113474266	intron (NM_018392, intron 22 of 27)	MLT1H|LTR|ERVL-MaLR	-36688	NM_024019	63973	Hs.744415	NM_024019	ENSG00000178403	NEUROG2	Atoh4|Math4A|NGN2|bHLHa8|ngn-2	neurogenin 2	protein-coding	2.98064
chr1	65805604	65806104	intron (NM_001256864, intron 1 of 18)	intron (NM_001256864, intron 1 of 18)	30636	NM_001256864	9829	Hs.647643	NM_014787	ENSG00000116675	DNAJC6	DJC6|PARK19	DnaJ heat shock protein family (Hsp40) member C6	protein-coding	3.13391
chr3	15033694	15034194	intron (NM_003298, intron 1 of 14)	intron (NM_003298, intron 1 of 14)	-43996	NR_046251	100505641	Hs.517821	NR_046251	ENSG00000225733	FGD5-AS1	-	FGD5 antisense RNA 1	ncRNA	4.52787
chr1	244394422	244394922	Intergenic	Intergenic	-121265	NM_001276349	200159	Hs.442703	NM_001012970	ENSG00000173728	C1orf100	-	chromosome 1 open reading frame 100	protein-coding	2.9723
chr3	72286787	72287287	Intergenic	L2b|LINE|L2	86629	NR_038221	201617	Hs.382623	NR_038221	ENSG00000243083	LINC00870	-	long intergenic non-protein coding RNA 870	ncRNA	4.51653
chr17	80674984	80675484	intron (NM_024619, intron 1 of 5)	CpG	652	NM_024619	79672	Hs.31431	NM_024619	ENSG00000141560	FN3KRP	FN3KL	fructosamine 3 kinase related protein	protein-coding	2.41522
chr3	43301073	43301573	Intergenic	Intergenic	-26681	NM_017719	54861	Hs.476052	NM_017719	ENSG00000163788	SNRK	HSNFRK	SNF related kinase	protein-coding	3.42594
chr14	93538936	93539436	TTS (NR_002808)	TTS (NR_002808)	5389	NR_002808	319085	Hs.612888	NR_002808	ENSG00000258730	ITPK1-AS1	C14orf85|ITPK1-AS|ITPK1AS|NCRNA00203	ITPK1 antisense RNA 1	ncRNA	3.20109
chr1	6419649	6420149	promoter-TSS (NM_181866)	promoter-TSS (NM_181866)	865	NM_181865	11332	Hs.126137	NM_007274	ENSG00000097021	ACOT7	ACH1|ACT|BACH|CTE-II|LACH|LACH1|hBACH	acyl-CoA thioesterase 7	protein-coding	3.95927
chr15	80061339	80061839	Intergenic	MER20|DNA|hAT-Charlie	127750	NR_037654	10588	Hs.194294	NM_006441	ENSG00000136371	MTHFS	HsT19268	methenyltetrahydrofolate synthetase	protein-coding	4.03616
chr10	72177960	72178460	intron (NM_004096, intron 1 of 2)	intron (NM_004096, intron 1 of 2)	14349	NM_004096	1979	Hs.621200	NM_004096	ENSG00000148730	EIF4EBP2	4EBP2|PHASII	eukaryotic translation initiation factor 4E binding protein 2	protein-coding	3.12005
chrX	106175614	106176325	Intergenic	Intergenic	12364	NM_020384	9075	Hs.522746	NM_020384	ENSG00000165376	CLDN2	-	claudin 2	protein-coding	4.68369
chr5	31161830	31162330	Intergenic	Intergenic	-31682	NM_004932	1004	Hs.124776	NM_004932	ENSG00000113361	CDH6	CAD6|KCAD	cadherin 6	protein-coding	3.09273
chr11	123101904	123102404	Intergenic	Intergenic	-36141	NM_024769	79827	Hs.591949	NM_024769	ENSG00000166250	CLMP	ACAM|ASAM|CSBM|CSBS	CXADR like membrane protein	protein-coding	4.80011
chr20	43987833	43988809	Intergenic	Intergenic	-2256	NM_001197129	90196	Hs.655055	NM_033542	ENSG00000204070	SYS1	C20orf169|dJ453C12.4|dJ453C12.4.1	SYS1, golgi trafficking protein	protein-coding	3.58503
chr11	78532656	78533156	intron (NM_001098816, intron 12 of 33)	L3|LINE|CR1	-246997	NM_024678	79731	Hs.503389	NM_024678	ENSG00000137513	NARS2	DFNB94|SLM5|asnRS	asparaginyl-tRNA synthetase 2, mitochondrial (putative)	protein-coding	inf
chrX	21818583	21819083	Intergenic	Intergenic	-38823	NM_015884	51360	Hs.443490	NM_015884	ENSG00000012174	MBTPS2	BRESEK|IFAP|KFSD|KFSDX|OLMSX|S2P	membrane bound transcription factor peptidase, site 2	protein-coding	2.44865
chr4	57331665	57332165	Intergenic	L2b|LINE|L2	-1847	NM_001267722	6731	Hs.237825	NM_006947	ENSG00000174780	SRP72	BMFF|BMFS1|HEL103	signal recognition particle 72	protein-coding	3.34407
chr10	71028374	71028874	Intergenic	AluSz|SINE|Alu	-1132	NM_033500	3098	Hs.370365	NM_000188	ENSG00000156515	HK1	HK|HK1-ta|HK1-tb|HK1-tc|HKD|HKI|HMSNR|HXK1|hexokinase	hexokinase 1	protein-coding	2.59592
chr11	123461232	123461732	intron (NM_001330396, intron 4 of 19)	intron (NM_001330396, intron 4 of 19)	30512	NM_001286564	57476	Hs.144725	NM_020716	ENSG00000023171	GRAMD1B	-	GRAM domain containing 1B	protein-coding	2.83317
chr14	91845522	91846022	intron (NM_001080414, intron 3 of 29)	intron (NM_001080414, intron 3 of 29)	38416	NM_001080414	440193	Hs.525536	NM_001080414	ENSG00000015133	CCDC88C	DAPLE|HKRP2|KIAA1509|SCA40	coiled-coil domain containing 88C	protein-coding	4.24652
chr1	229846224	229846942	Intergenic	L1MEc|LINE|L1	84620	NM_001314021	9816	Hs.533628	NM_014777	ENSG00000135763	URB2	KIAA0133|NET10|NPA2	URB2 ribosome biogenesis 2 homolog (S. cerevisiae)	protein-coding	3.73931
chr17	48210323	48210823	TTS (NM_032595)	TTS (NM_032595)	-3327	NM_001257359	201191	Hs.567769	NM_174920	ENSG00000167100	SAMD14	-	sterile alpha motif domain containing 14	protein-coding	3.07173
chr16	75340116	75340616	intron (NM_006324, intron 5 of 6)	intron (NM_006324, intron 5 of 6)	-38415	NM_001170715	9564	Hs.479747	NM_014567	ENSG00000050820	BCAR1	CAS|CAS1|CASS1|CRKAS|P130Cas	BCAR1, Cas family scaffolding protein	protein-coding	4.17975
chr20	43089572	43090072	TTS (NR_132342)	TTS (NR_132342)	4162	NR_132343	140834	Hs.357589	NM_001287807	ENSG00000168746	LINC01620	C20orf62|dJ1013A22.3	long intergenic non-protein coding RNA 1620	ncRNA	3.73701
chr17	62987043	62987543	Intergenic	MLT1A|LTR|ERVL-MaLR	-15590	NR_026903	201283	Hs.396447	NM_153032	ENSG00000214174	AMZ2P1	-	archaelysin family metallopeptidase 2 pseudogene 1	pseudo	3.79808
chr1	120216132	120217086	Intergenic	LTR64|LTR|ERV1	-26219	NM_001080470	90874	Hs.381105	NM_001080470	ENSG00000143067	ZNF697	-	zinc finger protein 697	protein-coding	3.18832
chr17	511702	512202	intron (NM_001128159, intron 11 of 21)	AluJr|SINE|Alu	106144	NM_001128159	55275	Hs.461819	NM_018289	ENSG00000141252	VPS53	HCCS1|PCH2E|hVps53L|pp13624	VPS53, GARP complex subunit	protein-coding	inf
chr1	226369395	226369895	intron (NM_022735, intron 1 of 7)	intron (NM_022735, intron 1 of 7)	4778	NM_022735	64746	Hs.520207	NM_022735	ENSG00000182827	ACBD3	GCP60|GOCAP1|GOLPH1|PAP7	acyl-CoA binding domain containing 3	protein-coding	3.65641
chr10	47074094	47074594	Intergenic	MLT1H2|LTR|ERVL-MaLR	-9190	NM_005972	5540	Hs.524719	NM_005972	ENSG00000204174	NPY4R	NPY4-R|PP1|PPYR1|Y4	neuropeptide Y receptor Y4	protein-coding	2.60016
chr20	42554345	42555060	intron (NM_001098796, intron 1 of 8)	intron (NM_001098796, intron 1 of 8)	9921	NM_001098796	84969	Hs.26608	NM_032883	ENSG00000124191	TOX2	C20orf100|GCX-1|GCX1|dJ1108D11.2|dJ495O3.1	TOX high mobility group box family member 2	protein-coding	4.21886
chr14	75700848	75701623	Intergenic	Intergenic	-44245	NM_005252	2353	Hs.25647	NM_005252	ENSG00000170345	FOS	AP-1|C-FOS|p55	Fos proto-oncogene, AP-1 transcription factor subunit	protein-coding	3.34797
chr16	1908319	1908898	intron (NM_152764, intron 5 of 12)	L2|LINE|L2	13493	NM_152764	254528	Hs.729604	NM_152764	ENSG00000162039	MEIOB	C16orf73|gs129	meiosis specific with OB domains	protein-coding	2.35176
chr1	53856250	53856750	Intergenic	L2c|LINE|L2	49193	NR_002314	163742	Hs.99394	NR_002314	ENSG00000236253	SLC25A3P1	-	solute carrier family 25 member 3 pseudogene 1	pseudo	4.4963
chr5	143800928	143801428	intron (NM_020768, intron 3 of 3)	intron (NM_020768, intron 3 of 3)	250741	NM_020768	57528	Hs.7093	NM_020768	ENSG00000183775	KCTD16	-	potassium channel tetramerization domain containing 16	protein-coding	3.32832
chr20	45728288	45728788	intron (NM_005244, intron 9 of 15)	L2c|LINE|L2	-67071	NR_037410	100500814		NR_037410	ENSG00000264901	MIR3616	mir-3616	microRNA 3616	ncRNA	3.4932
chr1	17389971	17390471	Intergenic	Intergenic	-9556	NM_003000	6390	Hs.465924	NM_003000	ENSG00000117118	SDHB	CWS2|IP|PGL4|SDH|SDH1|SDH2|SDHIP	succinate dehydrogenase complex iron sulfur subunit B	protein-coding	2.64232
chr7	134040692	134041192	Intergenic	Intergenic	-39115	NM_032826	84912	Hs.490181	NM_032826	ENSG00000205060	SLC35B4	YEA|YEA4	solute carrier family 35 member B4	protein-coding	4.11478
chr10	104283335	104283835	intron (NM_016169, intron 2 of 11)	L2a|LINE|L2	19866	NM_016169	51684	Hs.404089	NM_016169	ENSG00000107882	SUFU	PRO1280|SUFUH|SUFUXL	SUFU negative regulator of hedgehog signaling	protein-coding	5.27402
chr1	17591664	17592164	intron (NM_016233, intron 3 of 15)	intron (NM_016233, intron 3 of 15)	-12470	NR_039768	100616188		NR_039768	ENSG00000266634	MIR3972	-	microRNA 3972	ncRNA	3.97399
chr12	105332160	105332660	Intergenic	MLT1I|LTR|ERVL-MaLR	-9938	NM_032148	84102	Hs.577463	NM_032148	ENSG00000136052	SLC41A2	SLC41A1-L1	solute carrier family 41 member 2	protein-coding	4.07905
chr1	17448823	17449323	Intergenic	MIR|SINE|MIR	-3125	NM_007365	11240	Hs.33455	NM_007365	ENSG00000117115	PADI2	PAD-H19|PAD2|PDI2	peptidyl arginine deiminase 2	protein-coding	4.25478
chr16	2319231	2319731	intron (NR_132988, intron 1 of 2)	intron (NR_132988, intron 1 of 2)	817	NR_132988	106660606	Hs.729989	NR_132988	ENSG00000260778	LOC106660606	-	uncharacterized LOC106660606	ncRNA	2.59826
chr3	193136762	193137262	intron (NM_032279, intron 25 of 29)	L1MA6|LINE|L1	-40498	NM_198505	344905	Hs.658032	NM_198505	ENSG00000187527	ATP13A5	-	ATPase 13A5	protein-coding	4.77455
chr9	116267020	116267520	intron (NM_130795, intron 1 of 15)	intron (NM_130795, intron 1 of 15)	3563	NM_001276261	5998	Hs.494875	NM_017790	ENSG00000138835	RGS3	C2PA|RGP3	regulator of G-protein signaling 3	protein-coding	6.96262
chr19	39481544	39482383	Intergenic	Intergenic	-15511	NR_104026	115290	Hs.531770	NM_024907	ENSG00000269190	FBXO17	FBG4|FBX26|FBXO26|Fbx17	F-box protein 17	protein-coding	4.78373
chr1	15322585	15323085	intron (NM_001017999, intron 2 of 7)	L2b|LINE|L2	50420	NM_001017999	23254	Hs.368823	NM_015209	ENSG00000189337	KAZN	KAZ	kazrin, periplakin interacting protein	protein-coding	2.54128
chr5	148835484	148835984	Intergenic	Intergenic	25525	NR_029686	406937		NR_029686	ENSG00000276365	MIR145	MIRN145|miR-145|miRNA145	microRNA 145	ncRNA	2.80728
chr1	36668965	36669874	Intergenic	Intergenic	-20593	NM_001321471	9967	Hs.744057	NM_005119	ENSG00000054118	THRAP3	TRAP150	thyroid hormone receptor associated protein 3	protein-coding	3.0705
chr3	148932469	148932969	intron (NR_046371, intron 1 of 17)	intron (NR_046371, intron 1 of 17)	7113	NM_000096	1356	Hs.558314	NM_000096	ENSG00000047457	CP	CP-2	ceruloplasmin	protein-coding	5.40459
chrX	20077802	20078302	intron (NM_152780, intron 3 of 15)	intron (NM_152780, intron 3 of 15)	-42747	NR_037414	100500809		NR_037414	ENSG00000264566	MIR23C	hsa-mir-23c|mir-23c	microRNA 23c	ncRNA	2.42843
chr17	39686964	39687464	Intergenic	Intergenic	-2573	NM_002276	3880	Hs.654568	NM_002276	ENSG00000171345	KRT19	CK19|K19|K1CS	keratin 19	protein-coding	3.95568
chr15	63150469	63150969	Intergenic	L2c|LINE|L2	34563	NR_029709	406965		NR_029709	ENSG00000211137	MIR190A	MIR190|MIRN190|hsa-mir-190a|miR-190|mir-190a	microRNA 190a	ncRNA	5.17866
chr21	44860651	44861415	Intergenic	Intergenic	-8871	NR_026960	284836	Hs.146127	NM_194309	ENSG00000188660	LINC00319	C21orf125|NCRNA00319|PRED49	long intergenic non-protein coding RNA 319	ncRNA	2.8787
chr14	78952453	78952953	intron (NM_004796, intron 1 of 16)	intron (NM_004796, intron 1 of 16)	82629	NM_004796	9369	Hs.368307	NM_004796	ENSG00000021645	NRXN3	C14orf60	neurexin 3	protein-coding	3.63045
chr16	68529629	68530129	Intergenic	AluSx|SINE|Alu	-43237	NM_001305207	146198	Hs.461074	NM_133458	ENSG00000184939	ZFP90	FIK|NK10|ZNF756|zfp-90	ZFP90 zinc finger protein	protein-coding	2.35067
chr14	68827811	68828311	intron (NM_001321809, intron 8 of 11)	MIRc|SINE|MIR	267443	NR_135816	100996664		NR_135816		LOC100996664	-	uncharacterized LOC100996664	ncRNA	3.82893
chr9	138624619	138625119	intron (NM_020822, intron 2 of 30)	intron (NM_020822, intron 2 of 30)	30838	NM_001272003	57582	Hs.104950	NM_020822	ENSG00000107147	KCNT1	EIEE14|ENFL5|KCa4.1|SLACK|Slo2.2|bA100C15.2	potassium sodium-activated channel subfamily T member 1	protein-coding	4.63431
chr4	2862456	2862956	intron (NM_001286645, intron 1 of 17)	L2a|LINE|L2	16829	NM_001286645	118	Hs.183706	NM_001119	ENSG00000087274	ADD1	ADDA	adducin 1	protein-coding	4.78899
chr5	133434202	133434702	Intergenic	Intergenic	-15937	NM_003202	6932	Hs.573153	NM_003202	ENSG00000081059	TCF7	TCF-1	transcription factor 7 (T-cell specific, HMG-box)	protein-coding	5.13452
chr19	45227057	45227557	Intergenic	Intergenic	-24671	NM_005178	602	Hs.31210	NM_005178	ENSG00000069399	BCL3	BCL4|D19S37	B-cell CLL/lymphoma 3	protein-coding	2.35678
chr2	102577553	102578053	Intergenic	Intergenic	-22124	NR_103791	100506328	Hs.516245	NR_103791		LINC01127	-	long intergenic non-protein coding RNA 1127	ncRNA	3.49609
chr6	112013710	112014210	intron (NM_002037, intron 12 of 13)	intron (NM_002037, intron 12 of 13)	27305	NM_153047	2534	Hs.390567	NM_002037	ENSG00000010810	FYN	SLK|SYN|p59-FYN	FYN proto-oncogene, Src family tyrosine kinase	protein-coding	4.36405
chr5	142361472	142362466	intron (NM_015071, intron 11 of 22)	intron (NM_015071, intron 11 of 22)	-113494	NR_046680	100874239	Hs.570896	NR_046680	ENSG00000226272	ARHGAP26-AS1	-	ARHGAP26 antisense RNA 1	ncRNA	2.3597
chrX	19776672	19777172	intron (NM_031892, intron 2 of 17)	intron (NM_031892, intron 2 of 17)	40995	NM_001024666	30011	Hs.726365	NM_031892	ENSG00000147010	SH3KBP1	CD2BP3|CIN85|GIG10|HSB-1|HSB1|MIG18	SH3 domain containing kinase binding protein 1	protein-coding	2.3827
chr1	118797141	118797641	Intergenic	L3|LINE|CR1	-69543	NM_206996	200162	Hs.528821	NM_206996	ENSG00000155761	SPAG17	CT143|PF6	sperm associated antigen 17	protein-coding	4.33335
chr2	133197389	133197889	intron (NM_001508, intron 1 of 1)	intron (NM_001508, intron 1 of 1)	23492	NM_001508	2863	Hs.432395	NM_001508	ENSG00000183840	GPR39	-	G protein-coupled receptor 39	protein-coding	5.00448
chr20	60717054	60717892	intron (NM_002792, intron 1 of 6)	intron (NM_002792, intron 1 of 6)	1041	NM_002792	5688	Hs.233952	NM_002792	ENSG00000101182	PSMA7	C6|HEL-S-276|HSPC|RC6-1|XAPC7	proteasome subunit alpha 7	protein-coding	2.37166
chr20	35437009	35437609	intron (NM_080627, intron 7 of 14)	intron (NM_080627, intron 7 of 14)	-35079	NM_001145318	79980	Hs.632268	NM_024918	ENSG00000149636	DSN1	C20orf172|KNL3|MIS13|dJ469A13.2|hKNL-3	DSN1 homolog, MIS12 kinetochore complex component	protein-coding	2.83381
chr14	75768520	75769020	Intergenic	AluJb|SINE|Alu	7663	NR_038421	731223	Hs.534624	NR_038421		LINC01220	-	long intergenic non-protein coding RNA 1220	ncRNA	3.47184
chr6	53875569	53876069	Intergenic	Intergenic	-7895	NM_138569	90523	Hs.449276	NM_138569	ENSG00000146147	MLIP	C6orf142|CIP	muscular LMNA interacting protein	protein-coding	4.02795
chr15	90001593	90002269	Intergenic	Intergenic	37883	NM_001321041	51458	Hs.459284	NM_016321	ENSG00000140519	RHCG	C15orf6|PDRC2|RHGK|SLC42A3	Rh family C glycoprotein	protein-coding	2.35059
chr5	38556017	38557013	promoter-TSS (NR_103553)	promoter-TSS (NR_103553)	233	NM_001127671	3977	Hs.133421	NM_002310	ENSG00000113594	LIFR	CD118|LIF-R|SJS2|STWS|SWS	leukemia inhibitory factor receptor alpha	protein-coding	2.63047
chr1	48337377	48338197	intron (NM_001194986, intron 2 of 6)	intron (NM_001194986, intron 2 of 6)	124775	NM_001194986	388630	Hs.61504	NM_001194986	ENSG00000269113	TRABD2B	TIKI2	TraB domain containing 2B	protein-coding	3.58969
chr1	173999550	174000050	Intergenic	AluJo|SINE|Alu	-37590	NM_001300850	149041	Hs.30258	NM_172071	ENSG00000135870	RC3H1	RNF198|ROQUIN	ring finger and CCCH-type domains 1	protein-coding	4.91502
chr12	113037555	113038055	intron (NM_001347952, intron 1 of 21)	MIRb|SINE|MIR	24904	NM_001347952	22895	Hs.21239	NM_014954	ENSG00000089169	RPH3A	-	rabphilin 3A	protein-coding	4.103
chr2	159810375	159810875	Intergenic	Intergenic	-14521	NM_001145909	85461	Hs.61590	NM_033394	ENSG00000115183	TANC1	ROLSB|TANC	tetratricopeptide repeat, ankyrin repeat and coiled-coil containing 1	protein-coding	2.91019
chr6	42089073	42089573	intron (NM_001164446, intron 2 of 4)	intron (NM_001164446, intron 2 of 4)	21392	NM_001164446	647024	Hs.444277	NM_001164446	ENSG00000188112	C6orf132	bA7K24.2	chromosome 6 open reading frame 132	protein-coding	3.82994
chr1	2343292	2344709	promoter-TSS (NM_002617)	promoter-TSS (NM_002617)	9	NM_002617	5192	Hs.732228	NM_002617	ENSG00000157911	PEX10	NALD|PBD6A|PBD6B|RNF69	peroxisomal biogenesis factor 10	protein-coding	3.48038
chr10	76649055	76649555	intron (NM_012330, intron 3 of 17)	intron (NM_012330, intron 3 of 17)	-23239	NR_134476	101929165	Hs.670533	NR_134476		LOC101929165	-	uncharacterized LOC101929165	ncRNA	2.56153
chr1	207414676	207415367	Intergenic	Intergenic	-79795	NM_000574	1604	Hs.126517	NM_000574	ENSG00000196352	CD55	CR|CROM|DAF|TC	CD55 molecule (Cromer blood group)	protein-coding	3.44416
chr16	84536153	84536653	intron (NM_020947, intron 1 of 7)	AluSz|SINE|Alu	1885	NM_020947	57707	Hs.288274	NM_020947	ENSG00000140950	TLDC1	KIAA1609	TBC/LysM-associated domain containing 1	protein-coding	3.8493
chr5	112489145	112489645	intron (NM_001085377, intron 3 of 18)	intron (NM_001085377, intron 3 of 18)	141217	NM_002387	4163	Hs.593171	NM_002387	ENSG00000171444	MCC	MCC1	mutated in colorectal cancers	protein-coding	4.84751
chr5	173656950	173657450	Intergenic	L2b|LINE|L2	-106157	NR_125806	101928176	Hs.436014	NR_125806	ENSG00000249306	LINC01411	-	long intergenic non-protein coding RNA 1411	ncRNA	2.33483
chr14	74855405	74855905	Intergenic	Intergenic	37150	NM_001105579	646658	Hs.12400	NM_001105579	ENSG00000183379	SYNDIG1L	CAPUCIN|DSPC1|IFITMD4|TMEM90A	synapse differentiation inducing 1 like	protein-coding	3.75916
chr1	54930249	54930749	Intergenic	Intergenic	-58431	NM_018070	23648	Hs.476706	NM_018070	ENSG00000157216	SSBP3	CSDP|SSDP|SSDP1	single stranded DNA binding protein 3	protein-coding	2.888
chr12	121582166	121582666	intron (NR_033953, intron 1 of 10)	MIRb|SINE|MIR	11785	NR_033955	5027	Hs.729169	NM_002562	ENSG00000089041	P2RX7	P2X7	purinergic receptor P2X 7	protein-coding	4.37993
chr9	117877741	117878241	intron (NM_002160, intron 1 of 27)	intron (NM_002160, intron 1 of 27)	2545	NM_002160	3371	Hs.143250	NM_002160	ENSG00000041982	TNC	150-225|DFNA56|GMEM|GP|HXB|JI|TN|TN-C	tenascin C	protein-coding	3.87612
chr16	28890476	28891588	promoter-TSS (NM_001286075)	promoter-TSS (NM_001286075)	210	NR_046290	100289092	Hs.666631	NR_046287	ENSG00000260442	ATP2A1-AS1	-	ATP2A1 antisense RNA 1	ncRNA	3.43279
chr11	67034929	67035429	intron (NM_001619, intron 1 of 20)	intron (NM_001619, intron 1 of 20)	1274	NM_001619	156	Hs.83636	NM_001619	ENSG00000173020	GRK2	ADRBK1|BARK1|BETA-ARK1	G protein-coupled receptor kinase 2	protein-coding	3.02635
chr7	103020774	103021274	intron (NR_135801, intron 12 of 17)	intron (NR_135801, intron 12 of 17)	33053	NM_001204453	5701	Hs.437366	NM_002803	ENSG00000161057	PSMC2	MSS1|Nbla10058|S7	proteasome 26S subunit, ATPase 2	protein-coding	3.5592
chr17	79800709	79801447	TTS (NM_000918)	TTS (NM_000918)	-8152	NM_001007533	116729	Hs.454720	NM_001007533	ENSG00000182676	PPP1R27	DYSFIP1	protein phosphatase 1 regulatory subunit 27	protein-coding	3.76706
chr17	79038856	79039356	intron (NM_017451, intron 3 of 14)	intron (NM_017451, intron 3 of 14)	30159	NM_006340	10458	Hs.128316	NM_006340	ENSG00000175866	BAIAP2	BAP2|FLAF3|IRSP53	BAI1 associated protein 2	protein-coding	3.11757
chr1	12696364	12697313	Intergenic	Intergenic	-7727	NM_001013630	343066	Hs.209954	NM_001013630	ENSG00000204518	AADACL4	-	arylacetamide deacetylase like 4	protein-coding	3.02579
chr7	43597574	43598074	intron (NM_015052, intron 29 of 29)	intron (NM_015052, intron 29 of 29)	-24868	NM_004760	9263	Hs.709489	NM_004760	ENSG00000164543	STK17A	DRAK1	serine/threonine kinase 17a	protein-coding	3.27186
chr15	86916983	86917483	intron (NM_152336, intron 17 of 24)	intron (NM_152336, intron 17 of 24)	-57034	NR_046012	727915	Hs.451281	NR_046012	ENSG00000260125	AGBL1-AS1	-	AGBL1 antisense RNA 1	ncRNA	inf
chr12	120680101	120680601	intron (NM_001080855, intron 1 of 11)	intron (NM_001080855, intron 1 of 11)	7613	NM_025157	5829	Hs.446336	NM_002859	ENSG00000089159	PXN	-	paxillin	protein-coding	4.59981
chr10	102456354	102457251	Intergenic	Intergenic	-38663	NM_001304569	5076	Hs.155644	NM_000278	ENSG00000075891	PAX2	FSGS7|PAPRS	paired box 2	protein-coding	4.88135
chr7	132135404	132135904	intron (NM_001105543, intron 3 of 3)	intron (NM_001105543, intron 3 of 3)	125669	NM_020911	91584	Hs.511454	NM_020911	ENSG00000221866	PLXNA4	FAYV2820|PLEXA4|PLXNA4A|PLXNA4B|PRO34003	plexin A4	protein-coding	4.83853
chr6	114466096	114466596	intron (NR_125845, intron 6 of 9)	intron (NR_125845, intron 6 of 9)	-82305	NM_153612	222537	Hs.645477	NM_153612	ENSG00000249853	HS3ST5	3-OST-5|3OST5|HS3OST5|NBLA04021	heparan sulfate-glucosamine 3-sulfotransferase 5	protein-coding	3.0826
chr12	96619833	96620333	intron (NM_005230, intron 2 of 4)	intron (NM_005230, intron 2 of 4)	-29155	NM_001303511	2004	Hs.46523	NM_005230	ENSG00000111145	ELK3	ERP|NET|SAP-2|SAP2	ELK3, ETS transcription factor	protein-coding	4.03131
chr5	160154279	160154779	intron (NM_025153, intron 2 of 25)	MER77B|LTR|ERVL	124690	NM_025153	23120	Hs.109358	NM_025153	ENSG00000118322	ATP10B	ATPVB	ATPase phospholipid transporting 10B (putative)	protein-coding	5.15893
chr8	129912826	129913326	Intergenic	Intergenic	-336151	NR_121672	101927774	Hs.628730	NR_121672		LINC00824	LINC01263	long intergenic non-protein coding RNA 824	ncRNA	3.06186
chr22	37897643	37898143	intron (NM_014550, intron 11 of 19)	intron (NM_014550, intron 11 of 19)	-15415	NM_002405	4242	Hs.517603	NM_002405	ENSG00000100060	MFNG	-	MFNG O-fucosylpeptide 3-beta-N-acetylglucosaminyltransferase	protein-coding	3.25625
chr3	50649073	50650020	promoter-TSS (NM_145071)	promoter-TSS (NM_145071)	254	NM_001243926	7867	Hs.234521	NM_004635	ENSG00000114738	MAPKAPK3	3PK|MAPKAP-K3|MAPKAP3|MAPKAPK-3|MDPT3|MK-3	mitogen-activated protein kinase-activated protein kinase 3	protein-coding	2.95829
chr20	43987833	43988809	Intergenic	Intergenic	-2256	NM_001197129	90196	Hs.655055	NM_033542	ENSG00000204070	SYS1	C20orf169|dJ453C12.4|dJ453C12.4.1	SYS1, golgi trafficking protein	protein-coding	2.42481
chr11	72916690	72917190	Intergenic	Intergenic	-12403	NM_176072	5029	Hs.339	NM_002564	ENSG00000175591	P2RY2	HP2U|P2RU1|P2U|P2U1|P2UR|P2Y2|P2Y2R	purinergic receptor P2Y2	protein-coding	4.09005
chr22	22973677	22974177	TTS (NR_024591)	TTS (NR_024591)	13085	NR_024591	25812	Hs.367764	NR_024591		POM121L1P	POM121L1	POM121 transmembrane nucleoporin like 1, pseudogene	pseudo	2.85543
chr1	36952385	36952885	Intergenic	Intergenic	-3720	NM_156039	1441	Hs.524517	NM_000760	ENSG00000119535	CSF3R	CD114|GCSFR|SCN7	colony stimulating factor 3 receptor	protein-coding	4.10667
chr19	3983909	3984409	exon (NM_001961, exon 2 of 15)	exon (NM_001961, exon 2 of 15)	1302	NM_001961	1938	Hs.515070	NM_001961	ENSG00000167658	EEF2	EEF-2|EF-2|EF2|SCA26	eukaryotic translation elongation factor 2	protein-coding	2.88506
chr17	1612609	1613109	exon (NM_001164407, exon 3 of 4)	exon (NM_001164407, exon 3 of 4)	803	NM_001164407	727910	Hs.531005	NM_001164407	ENSG00000185561	TLCD2	-	TLC domain containing 2	protein-coding	2.94436
chr16	4606128	4606628	promoter-TSS (NM_001145011)	promoter-TSS (NM_001145011)	-113	NM_001145011	342346	Hs.684212	NM_001145011	ENSG00000205832	C16orf96	-	chromosome 16 open reading frame 96	protein-coding	3.14635
chr1	54372975	54373475	intron (NM_001039715, intron 2 of 2)	intron (NM_001039715, intron 2 of 2)	13365	NM_213593	1733	Hs.251415	NM_000792	ENSG00000211452	DIO1	5DI|TXDI1	iodothyronine deiodinase 1	protein-coding	4.54716
chr15	91210237	91210915	intron (NR_120372, intron 2 of 3)	intron (NR_120372, intron 2 of 3)	7111	NR_120371	101929765	Hs.615348	NR_120371	ENSG00000245479	LINC01585	-	long intergenic non-protein coding RNA 1585	ncRNA	3.05414
chr15	99212085	99213011	intron (NM_000875, intron 1 of 20)	intron (NM_000875, intron 1 of 20)	-18098	NR_126453	104472848	Hs.349049	NR_126453		IRAIN	IGF1R-AS	IGF1R antisense imprinted non-protein coding RNA	ncRNA	3.37879
chr16	56723059	56723559	Intergenic	Intergenic	6927	NM_005952	4501	Hs.374950	NM_005952	ENSG00000187193	MT1X	MT-1l|MT1	metallothionein 1X	protein-coding	3.91112
chr12	63154423	63154923	intron (NM_020700, intron 4 of 9)	intron (NM_020700, intron 4 of 9)	157207	NR_029661	406891		NR_029661	ENSG00000199179	MIRLET7I	LET7I|MIRNLET7I|hsa-let-7i|let-7i	microRNA let-7i	ncRNA	2.55654
chr12	105873963	105874463	Intergenic	LTR40c|LTR|ERVL	149799	NM_001145199	387882	Hs.368938	NM_207376	ENSG00000235162	C12orf75	AGD3|OCC-1|OCC1	chromosome 12 open reading frame 75	protein-coding	2.74967
chr10	118507519	118508019	intron (NM_001330164, intron 2 of 12)	intron (NM_001330164, intron 2 of 12)	-5684	NM_025015	259217	Hs.648448	NM_025015	ENSG00000165868	HSPA12A	-	heat shock protein family A (Hsp70) member 12A	protein-coding	3.40261
chr13	41078153	41078841	Intergenic	Intergenic	-23354	NR_024506	646982	Hs.287664	NR_024505	ENSG00000215483	LINC00598	-	long intergenic non-protein coding RNA 598	ncRNA	2.99049
chr8	124512226	124512726	3' UTR (NM_058229, exon 9 of 9)	3' UTR (NM_058229, exon 9 of 9)	31907	NM_148177	114907	Hs.403933	NM_058229	ENSG00000156804	FBXO32	Fbx32|MAFbx	F-box protein 32	protein-coding	4.45146
chr7	70067002	70067502	intron (NM_015570, intron 5 of 18)	intron (NM_015570, intron 5 of 18)	-530271	NM_022479	64409	Hs.488591	NM_022479	ENSG00000185274	WBSCR17	GALNACT17|GALNT16|GALNT20|GALNTL3|GalNAc-T5L	Williams-Beuren syndrome chromosome region 17	protein-coding	inf
chr17	17620213	17620713	intron (NM_030665, intron 1 of 5)	intron (NM_030665, intron 1 of 5)	35676	NM_030665	10743	Hs.655395	NM_030665	ENSG00000108557	RAI1	SMCR|SMS	retinoic acid induced 1	protein-coding	4.97728
chr12	131438173	131438673	promoter-TSS (NM_198827)	promoter-TSS (NM_198827)	-29	NM_198827	283383	Hs.719239	NM_198827	ENSG00000111452	ADGRD1	GPR133|PGR25	adhesion G protein-coupled receptor D1	protein-coding	2.77796
chr18	67664535	67665035	Intergenic	Intergenic	-40373	NM_006566	10666	Hs.660130	NM_006566	ENSG00000150637	CD226	DNAM-1|DNAM1|PTA1|TLiSA1	CD226 molecule	protein-coding	inf
chr22	46501652	46502152	intron (NR_027033, intron 4 of 5)	intron (NR_027033, intron 4 of 5)	-6727	NR_029478	406883		NR_029478	ENSG00000197182	MIRLET7A3	LET7A3|MIRNLET7A3|let-7a-3	microRNA let-7a-3	ncRNA	3.5769
chr2	119430130	119430630	Intergenic	MIR3|SINE|MIR	-69838	NR_110272	101927709	Hs.274529	NR_110272		LOC101927709	-	uncharacterized LOC101927709	ncRNA	2.58913
chr1	92970593	92971093	Intergenic	Intergenic	-18410	NM_005263	2672	Hs.73172	NM_005263	ENSG00000162676	GFI1	GFI-1|GFI1A|SCN2|ZNF163	growth factor independent 1 transcriptional repressor	protein-coding	3.4211
chr1	54055353	54055853	intron (NM_147193, intron 3 of 9)	intron (NM_147193, intron 3 of 9)	130531	NM_033067	63948	Hs.131654	NM_033067	ENSG00000143006	DMRTB1	-	DMRT like family B with proline rich C-terminal 1	protein-coding	4.05984
chr2	111936466	111936966	Intergenic	Intergenic	58225	NM_001204111	10018	Hs.469658	NM_006538	ENSG00000153094	BCL2L11	BAM|BIM|BOD	BCL2 like 11	protein-coding	4.66268
chr10	89395225	89395934	Intergenic	HERVL-int|LTR|ERVL	-23896	NM_004670	9060	Hs.524491	NM_004670	ENSG00000198682	PAPSS2	ATPSK2|BCYM4|SK2	3'-phosphoadenosine 5'-phosphosulfate synthase 2	protein-coding	2.76352
chr11	57269502	57270002	intron (NM_001198810, intron 2 of 14)	MIRb|SINE|MIR	12606	NM_001198810	8501	Hs.591952	NM_003627	ENSG00000149150	SLC43A1	LAT3|PB39|POV1|R00504	solute carrier family 43 member 1	protein-coding	5.61717
chr3	123967226	123968005	intron (NM_001024660, intron 3 of 59)	intron (NM_001024660, intron 3 of 59)	115840	NR_049798	100847021		NR_049798	ENSG00000266383	MIR5002	-	microRNA 5002	ncRNA	2.62701
chr11	95831029	95831621	intron (NM_032427, intron 1 of 4)	intron (NM_032427, intron 1 of 4)	-173954	NM_016156	8898	Hs.181326	NM_016156	ENSG00000087053	MTMR2	CMT4B|CMT4B1	myotubularin related protein 2	protein-coding	3.82565
chr1	145743470	145743970	intron (NM_002614, intron 2 of 9)	intron (NM_002614, intron 2 of 9)	16054	NM_001201326	5174	Hs.444751	NM_002614	ENSG00000174827	PDZK1	CAP70|CLAMP|NHERF-3|NHERF3|PDZD1	PDZ domain containing 1	protein-coding	3.50036
chr1	156349034	156349534	intron (NR_046115, intron 5 of 10)	intron (NR_046115, intron 5 of 10)	10304	NR_046115	57127	Hs.131835	NM_020407	ENSG00000132677	RHBG	SLC42A2	Rh family B glycoprotein (gene/pseudogene)	protein-coding	3.23427
chr2	236617714	236618214	intron (NM_001037131, intron 2 of 17)	intron (NM_001037131, intron 2 of 17)	203569	NR_131900	100506749	Hs.684184	NR_131900	ENSG00000235529	AGAP1-IT1	-	AGAP1 intronic transcript 1	ncRNA	2.41468
chr1	22237847	22238347	intron (NM_001291860, intron 1 of 96)	intron (NM_001291860, intron 1 of 96)	25693	NM_001291860	3339	Hs.562227	NM_005529	ENSG00000142798	HSPG2	HSPG|PLC|PRCAN|SJA|SJS|SJS1	heparan sulfate proteoglycan 2	protein-coding	4.34404
chr10	100053389	100054073	Intergenic	Intergenic	-25724	NM_032211	84171	Hs.306814	NM_032211	ENSG00000138131	LOXL4	LOXC	lysyl oxidase like 4	protein-coding	4.96046
chr10	99681382	99681882	intron (NM_018058, intron 4 of 14)	intron (NM_018058, intron 4 of 14)	71637	NM_001010917	401647	Hs.567524	NM_001010917	ENSG00000155265	GOLGA7B	C10orf132|C10orf133|bA451M19.3|bA459F3.4	golgin A7 family member B	protein-coding	3.62473
chr2	226153813	226154313	Intergenic	LTR16C|LTR|ERVL	-111539	NM_020864	57624	Hs.224409	NM_020864	ENSG00000144460	NYAP2	KIAA1486	neuronal tyrosine-phosphorylated phosphoinositide-3-kinase adaptor 2	protein-coding	2.99906
chr14	97966408	97966908	intron (NR_110166, intron 1 of 4)	intron (NR_110166, intron 1 of 4)	41505	NR_110166	101929241	Hs.650839	NR_110165	ENSG00000246084	LOC101929241	-	uncharacterized LOC101929241	ncRNA	3.34396
chr6	42081698	42082198	intron (NM_001164446, intron 2 of 4)	intron (NM_001164446, intron 2 of 4)	28767	NM_001164446	647024	Hs.444277	NM_001164446	ENSG00000188112	C6orf132	bA7K24.2	chromosome 6 open reading frame 132	protein-coding	3.72686
chr22	29168399	29169608	promoter-TSS (NM_001284265)	promoter-TSS (NM_001284265)	-121	NM_001284265	150275	Hs.406460	NM_173510	ENSG00000159873	CCDC117	dJ366L4.1	coiled-coil domain containing 117	protein-coding	2.32741
chr5	132792395	132792895	intron (NM_015082, intron 3 of 15)	intron (NM_015082, intron 3 of 15)	-29247	NR_031621	100302134		NR_031621	ENSG00000221287	MIR1289-2	MIRN1289-2|hsa-mir-1289-2	microRNA 1289-2	ncRNA	3.15954
chr1	210757671	210758336	intron (NM_001122834, intron 9 of 11)	intron (NM_001122834, intron 9 of 11)	255364	NM_001170580	55733	Hs.58650	NM_018194	ENSG00000054392	HHAT	MART2|SKI1|Skn	hedgehog acyltransferase	protein-coding	3.83148
chr1	153724985	153725485	intron (NM_023015, intron 8 of 29)	intron (NM_023015, intron 8 of 29)	-22533	NM_024330	11000	Hs.438723	NM_024330	ENSG00000143554	SLC27A3	ACSVL3|FATP3|VLCS-3	solute carrier family 27 member 3	protein-coding	3.2691
chr1	155668068	155668568	intron (NM_033657, intron 1 of 12)	HERVK14C-int|LTR|ERVK	9433	NM_004632	7818	Hs.516746	NM_004632	ENSG00000132676	DAP3	DAP-3|MRP-S29|MRPS29|bMRP-10	death associated protein 3	protein-coding	3.39873
chr6	39265724	39266224	TTS (NM_001135111)	TTS (NM_001135111)	16262	NM_031460	89822	Hs.162282	NM_031460	ENSG00000124780	KCNK17	K2p17.1|TALK-2|TALK2|TASK-4|TASK4	potassium two pore domain channel subfamily K member 17	protein-coding	4.70769
chr21	39450448	39450948	intron (NM_005867, intron 2 of 2)	intron (NM_005867, intron 2 of 2)	42756	NM_005867	10281	Hs.23251	NM_005867	ENSG00000184029	DSCR4	DCRB|DSCRB	Down syndrome critical region 4	protein-coding	3.07941
chr17	17843598	17844098	intron (NM_001288789, intron 1 of 12)	intron (NM_001288789, intron 1 of 12)	31936	NM_001082968	146691	Hs.462379	NM_144678	ENSG00000175662	TOM1L2	-	target of myb1 like 2 membrane trafficking protein	protein-coding	3.25475
chr22	45072515	45073168	5' UTR (NM_015366, exon 1 of 9)	5' UTR (NM_015366, exon 1 of 9)	154	NM_001017530	55615	Hs.102336	NM_015366	ENSG00000186654	PRR5	FLJ20185k|PP610|PROTOR-1|PROTOR1	proline rich 5	protein-coding	3.94372
chr11	78519956	78520456	intron (NM_001098816, intron 14 of 33)	intron (NM_001098816, intron 14 of 33)	-234297	NM_024678	79731	Hs.503389	NM_024678	ENSG00000137513	NARS2	DFNB94|SLM5|asnRS	asparaginyl-tRNA synthetase 2, mitochondrial (putative)	protein-coding	5.25378
chr10	99291144	99291644	intron (NM_024954, intron 1 of 2)	intron (NM_024954, intron 1 of 2)	32755	NM_024954	80019	Hs.500724	NM_024954	ENSG00000165886	UBTD1	-	ubiquitin domain containing 1	protein-coding	3.15236
chr2	238498978	238499995	non-coding (NR_033308, exon 1 of 5)	non-coding (NR_033308, exon 1 of 5)	282	NM_022449	64284	Hs.44278	NM_022449	ENSG00000124839	RAB17	-	RAB17, member RAS oncogene family	protein-coding	3.10159
chr20	62588300	62588800	promoter-TSS (NR_126526)	promoter-TSS (NR_126526)	-750	NM_017859	54963	Hs.504998	NM_017859	ENSG00000198276	UCKL1	UCK1L|URKL1	uridine-cytidine kinase 1 like 1	protein-coding	2.44886
chr18	3710862	3711362	intron (NM_001308390, intron 4 of 10)	intron (NM_001308390, intron 4 of 10)	107377	NR_119377	84777	Hs.659053	NM_032691		DLGAP1-AS2	-	DLGAP1 antisense RNA 2	ncRNA	2.61726
chr1	14435342	14435842	Intergenic	Intergenic	359716	NM_001007257	7799	Hs.371823	NM_012231	ENSG00000116731	PRDM2	HUMHOXY1|KMT8|KMT8A|MTB-ZF|RIZ|RIZ1|RIZ2	PR/SET domain 2	protein-coding	4.4886
chr10	93349143	93349643	intron (NR_024467, intron 1 of 4)	intron (NR_024467, intron 1 of 4)	21824	NR_024467	100188947	Hs.535293	NR_024467		HECTD2-AS1	-	HECTD2 antisense RNA 1	ncRNA	4.09617
chr17	42993316	42993816	promoter-TSS (NM_001131019)	promoter-TSS (NM_001131019)	-646	NM_001242376	2670	Hs.514227	NM_002055	ENSG00000131095	GFAP	ALXDRD	glial fibrillary acidic protein	protein-coding	3.58573
chr2	192512585	192513085	Intergenic	Intergenic	-29963	NM_001254736	64859	Hs.591610	NM_022837	ENSG00000173559	NABP1	OBFC2A|SOSS-B2|SSB2	nucleic acid binding protein 1	protein-coding	2.40875
chr9	139753763	139754263	intron (NM_206920, intron 25 of 26)	intron (NM_206920, intron 25 of 26)	6775	NM_153200	8721	Hs.174050	NM_003792	ENSG00000107223	EDF1	CFAP280|EDF-1|MBF1	endothelial differentiation related factor 1	protein-coding	3.60579
chr10	86068478	86068978	Intergenic	Intergenic	-19617	NM_001284240	54462	Hs.461988	NM_018999	ENSG00000107771	CCSER2	FAM190B|Gcap14|KIAA1128|bA486O22.1	coiled-coil serine rich protein 2	protein-coding	2.73408
chr1	57590433	57590933	intron (NM_021080, intron 6 of 16)	MIRb|SINE|MIR	-158870	NM_001278544	732	Hs.391835	NM_000066	ENSG00000021852	C8B	C82	complement C8 beta chain	protein-coding	3.78327
chr2	75070970	75071470	intron (NM_000189, intron 1 of 17)	intron (NM_000189, intron 1 of 17)	11438	NM_000189	3099	Hs.406266	NM_000189	ENSG00000159399	HK2	HKII|HXK2	hexokinase 2	protein-coding	3.83676
chr13	96133296	96133796	intron (NR_046533, intron 3 of 3)	intron (NR_046533, intron 3 of 3)	47693	NM_001160100	9071	Hs.534377	NM_006984	ENSG00000134873	CLDN10	CPETRL3|OSP-L	claudin 10	protein-coding	3.25938
chr7	30016278	30016778	intron (NM_001145514, intron 1 of 7)	intron (NM_001145514, intron 1 of 7)	12897	NM_001145515	9805	Hs.520740	NM_014766	ENSG00000136193	SCRN1	SES1	secernin 1	protein-coding	4.84031
chr19	38457493	38457993	intron (NM_015073, intron 1 of 21)	MLT1C|LTR|ERVL-MaLR	59882	NM_015073	23094	Hs.655502	NM_015073	ENSG00000105738	SIPA1L3	CTRCT45|SPAL3|SPAR3	signal induced proliferation associated 1 like 3	protein-coding	2.87828
chr7	3951226	3951943	intron (NM_152744, intron 5 of 44)	L2c|LINE|L2	-217732	NM_001079653	221935	Hs.653013	NM_152744	ENSG00000146555	SDK1	-	sidekick cell adhesion molecule 1	protein-coding	2.34903
chr11	119238990	119239684	intron (NM_001243759, intron 1 of 11)	intron (NM_001243759, intron 1 of 11)	-4445	NM_171997	9099	Hs.524085	NM_004205	ENSG00000036672	USP2	UBP41|USP9	ubiquitin specific peptidase 2	protein-coding	3.40472
chr15	65946392	65946892	3' UTR (NM_001301031, exon 8 of 8)	3' UTR (NM_001301031, exon 8 of 8)	11399	NM_001254740	9187	Hs.173092	NM_004727	ENSG00000074621	SLC24A1	CSNB1D|HsT17412|NCKX|NCKX1|RODX	solute carrier family 24 member 1	protein-coding	5.8936
chr17	74496787	74497879	intron (NM_024599, intron 1 of 18)	CpG	176	NM_024599	79651	Hs.464157	NM_024599	ENSG00000129667	RHBDF2	RHBDL5|RHBDL6|TEC|TOC|TOCG|iRhom2	rhomboid 5 homolog 2	protein-coding	3.39611
chr5	176423431	176423931	intron (NM_001199298, intron 1 of 14)	L1M4b|LINE|L1	9762	NM_016290	51720	Hs.232721	NM_016290	ENSG00000087206	UIMC1	RAP80|X2HRIP110	ubiquitin interaction motif containing 1	protein-coding	2.98261
chr1	229199989	229200489	Intergenic	Intergenic	110309	NR_039659	100616234		NR_039659	ENSG00000283468	MIR4454	-	microRNA 4454	ncRNA	3.79007
chr11	76480678	76481178	Intergenic	Intergenic	-12429	NM_001258210	25987	Hs.8361	NM_015516	ENSG00000182704	TSKU	E2IG4|LRRC54|TSK	tsukushi, small leucine rich proteoglycan	protein-coding	2.75958
chr17	8323580	8324080	Intergenic	Intergenic	-15340	NM_001025579	81565	Hs.372123	NM_030808	ENSG00000166579	NDEL1	EOPA|MITAP1|NDE1L1|NDE2|NUDEL	nudE neurodevelopment protein 1 like 1	protein-coding	4.26684
chr11	107028532	107029032	Intergenic	MER21-int|LTR|ERVL	-139611	NM_001256424	2977	Hs.24321	NM_000855	ENSG00000152402	GUCY1A2	GC-SA2|GUC1A2	guanylate cyclase 1 soluble subunit alpha 2	protein-coding	2.3567
chr8	41093057	41093557	Intergenic	Intergenic	35355	NR_049801	100847068		NR_049801	ENSG00000263372	MIR548AO	-	microRNA 548ao	ncRNA	3.52004
chr11	6659125	6659625	intron (NM_003737, intron 2 of 20)	intron (NM_003737, intron 2 of 20)	17705	NM_003737	8642	Hs.199850	NM_003737	ENSG00000166341	DCHS1	CDH19|CDH25|CDHR6|FIB1|MVP2|PCDH16|VMLDS1	dachsous cadherin-related 1	protein-coding	2.35288
chr1	205882469	205882969	3' UTR (NM_052934, exon 21 of 21)	3' UTR (NM_052934, exon 21 of 21)	29869	NM_134325	115019	Hs.164073	NM_052934	ENSG00000174502	SLC26A9	-	solute carrier family 26 member 9	protein-coding	5.51679
chr6	138195284	138195784	intron (NM_006290, intron 2 of 8)	intron (NM_006290, intron 2 of 8)	-6164	NR_049793	100130476	Hs.598050	NR_049793	ENSG00000237499	LOC100130476	-	uncharacterized LOC100130476	ncRNA	4.35784
chr1	20084804	20085304	intron (NM_181719, intron 6 of 15)	intron (NM_181719, intron 6 of 15)	41356	NM_181719	255104	Hs.656313	NM_181719	ENSG00000162542	TMCO4	-	transmembrane and coiled-coil domains 4	protein-coding	2.49147
chr11	57060403	57060903	Intergenic	Intergenic	31760	NM_033396	85456	Hs.530730	NM_033396	ENSG00000149115	TNKS1BP1	TAB182	tankyrase 1 binding protein 1	protein-coding	2.85016
chr1	15031202	15031875	intron (NM_201628, intron 1 of 14)	MLT1B|LTR|ERVL-MaLR	106326	NM_201628	23254	Hs.368823	NM_015209	ENSG00000189337	KAZN	KAZ	kazrin, periplakin interacting protein	protein-coding	2.94332
chr5	151087650	151088150	Intergenic	Intergenic	-21285	NM_001309444	6678	Hs.111779	NM_003118	ENSG00000113140	SPARC	BM-40|OI17|ON	secreted protein acidic and cysteine rich	protein-coding	3.16628
chr1	4744195	4744695	intron (NM_001042478, intron 1 of 5)	intron (NM_001042478, intron 1 of 5)	29340	NM_018836	55966	Hs.12473	NM_018836	ENSG00000196581	AJAP1	MOT8|SHREW-1|SHREW1	adherens junctions associated protein 1	protein-coding	2.93453
chr14	68023747	68024247	exon (NM_020715, exon 4 of 29)	exon (NM_020715, exon 4 of 29)	23989	NM_020715	57475	Hs.594236	NM_020715	ENSG00000054690	PLEKHH1	-	pleckstrin homology, MyTH4 and FERM domain containing H1	protein-coding	2.39369
chr14	103844518	103845254	Intergenic	MIRb|SINE|MIR	-6815	NM_001128919	4140	Hs.35828	NM_002376	ENSG00000075413	MARK3	CTAK1|KP78|PAR1A|Par-1a	microtubule affinity regulating kinase 3	protein-coding	4.33502
chr9	124507140	124507640	intron (NM_138709, intron 1 of 13)	intron (NM_138709, intron 1 of 13)	2326	NM_138709	153090	Hs.522378	NM_032552	ENSG00000136848	DAB2IP	AF9Q34|AIP-1|AIP1|DIP1/2	DAB2 interacting protein	protein-coding	2.58071
chr17	19301687	19302187	Intergenic	Intergenic	-11405	NM_001198695	4239	Hs.296049	NM_002404	ENSG00000166482	MFAP4	-	microfibrillar associated protein 4	protein-coding	4.68314
chr2	74775665	74776352	promoter-TSS (NM_001197260)	promoter-TSS (NM_001197260)	-138	NM_001197260	1796	Hs.103854	NM_001381	ENSG00000115325	DOK1	P62DOK|pp62	docking protein 1	protein-coding	2.48108
chr9	130286503	130287180	intron (NM_001035534, intron 4 of 13)	MIRb|SINE|MIR	44554	NM_022833	64855	Hs.522401	NM_022833	ENSG00000136830	FAM129B	C9orf88|MEG-3|MINERVA|OC58|bA356B19.6	family with sequence similarity 129 member B	protein-coding	2.7684
chr1	41111983	41112483	intron (NM_014747, intron 2 of 7)	intron (NM_014747, intron 2 of 7)	19091	NM_014747	9783	Hs.654808	NM_014747	ENSG00000117016	RIMS3	NIM3|RIM3	regulating synaptic membrane exocytosis 3	protein-coding	4.17914
chr15	53004115	53004615	Intergenic	MLT1G3|LTR|ERVL-MaLR	-33534	NM_019600	56204	Hs.152385	NM_019600	ENSG00000047346	FAM214A	KIAA1370	family with sequence similarity 214 member A	protein-coding	6.71312
chr8	143283129	143283629	intron (NR_024378, intron 1 of 2)	intron (NR_024378, intron 1 of 2)	3662	NR_024378	619434	Hs.393308	NR_024378	ENSG00000254008	LINC00051	C8orf43|NCRNA00051	long intergenic non-protein coding RNA 51	ncRNA	4.35594
chr1	156719421	156719921	5' UTR (NM_001319188, exon 2 of 7)	5' UTR (NM_001319188, exon 2 of 7)	1414	NM_001319188	3068	Hs.743948	NM_004494	ENSG00000143321	HDGF	HMG1L2	hepatoma-derived growth factor	protein-coding	3.63027
chr2	113427078	113427578	Intergenic	AluSx1|SINE|Alu	23894	NM_005415	6574	Hs.187946	NM_005415	ENSG00000144136	SLC20A1	GLVR1|Glvr-1|PIT1|PiT-1	solute carrier family 20 member 1	protein-coding	3.85081
chr3	11237459	11237959	intron (NM_001098212, intron 1 of 1)	intron (NM_001098212, intron 1 of 1)	-29960	NM_001098211	3269	Hs.1570	NM_000861	ENSG00000196639	HRH1	H1-R|H1R|HH1R|hisH1	histamine receptor H1	protein-coding	2.46801
chr5	31910136	31910636	intron (NM_178140, intron 2 of 24)	AluSx|SINE|Alu	25879	NR_036241	100422874		NR_036241	ENSG00000266243	MIR4279	-	microRNA 4279	ncRNA	3.93379
chr14	53968077	53968758	Intergenic	Intergenic	348346	NR_110062	101927620		NR_110062	ENSG00000258731	LOC101927620	-	uncharacterized LOC101927620	ncRNA	3.16143
chr11	44322297	44322797	intron (NM_021926, intron 1 of 3)	L2b|LINE|L2	9169	NM_021926	60529	Hs.436055	NM_021926	ENSG00000052850	ALX4	CRS5|FND2	ALX homeobox 4	protein-coding	2.4432
chr2	27286381	27286881	intron (NR_138023, intron 11 of 15)	intron (NR_138023, intron 11 of 15)	7936	NM_001134693	100128731	Hs.502948	NM_001134693	ENSG00000228474	OST4	-	oligosaccharyltransferase complex subunit 4, non-catalytic	protein-coding	4.50461
chr8	128938479	128938979	intron (NR_003367, intron 2 of 8)	LTR16A1|LTR|ERVL	22240	NR_103558	641384	Hs.629674	NM_001037234	ENSG00000280055	TMEM75	-	transmembrane protein 75	ncRNA	2.7211
chr6	159088040	159088540	intron (NM_001318745, intron 2 of 14)	intron (NM_001318745, intron 2 of 14)	3855	NM_001318745	94120	Hs.436977	NM_001009991	ENSG00000164674	SYTL3	SLP3	synaptotagmin like 3	protein-coding	5.31164
chr9	100908343	100908843	intron (NM_052820, intron 2 of 11)	intron (NM_052820, intron 2 of 11)	26581	NM_003389	7464	Hs.113094	NM_003389	ENSG00000106789	CORO2A	CLIPINB|IR10|WDR2	coronin 2A	protein-coding	4.61307
chr19	39481544	39482383	Intergenic	Intergenic	-15511	NR_104026	115290	Hs.531770	NM_024907	ENSG00000269190	FBXO17	FBG4|FBX26|FBXO26|Fbx17	F-box protein 17	protein-coding	2.88012
chr7	30329796	30330296	promoter-TSS (NR_037513)	promoter-TSS (NR_037513)	-540	NR_037513	100500883		NR_037513	ENSG00000283237	MIR550B1	-	microRNA 550b-1	ncRNA	2.94984
chr10	101804113	101804613	intron (NM_001308, intron 8 of 8)	AluJb|SINE|Alu	-34653	NM_015221	23268	Hs.500771	NM_015221	ENSG00000107554	DNMBP	ARHGEF36|TUBA	dynamin binding protein	protein-coding	2.56582
chr10	101096931	101097431	intron (NR_144311, intron 1 of 10)	L2c|LINE|L2	8325	NM_001345889	26507	Hs.274579	NM_020348	ENSG00000119946	CNNM1	ACDP1|CLP-1	cyclin and CBS domain divalent metal cation transport mediator 1	protein-coding	4.03798
chrX	8381280	8381780	Intergenic	Intergenic	-51341	NM_001001888	425054	Hs.279737	NM_001001888	ENSG00000205642	VCX3B	VCX-C|VCXC	variable charge, X-linked 3B	protein-coding	3.45911
chr22	46773405	46773905	intron (NM_014246, intron 23 of 34)	intron (NM_014246, intron 23 of 34)	42357	NM_001282783	55687	Hs.439524	NM_018006	ENSG00000100416	TRMU	LCAL3|MTO2|MTU1|TRMT|TRMT1|TRNT1	tRNA 5-methylaminomethyl-2-thiouridylate methyltransferase	protein-coding	2.73327
chr2	169868614	169869114	intron (NM_003742, intron 5 of 27)	intron (NM_003742, intron 5 of 27)	18969	NM_003742	8647	Hs.658439	NM_003742	ENSG00000073734	ABCB11	ABC16|BRIC2|BSEP|PFIC-2|PFIC2|PGY4|SPGP	ATP binding cassette subfamily B member 11	protein-coding	2.8582
chr6	31838799	31839299	intron (NM_025257, intron 9 of 20).3	intron (NM_025257, intron 9 of 20).3	6399	NM_001178045	80736	Hs.335355	NM_025257	ENSG00000204385	SLC44A4	C6orf29|CTL4|NG22|TPPT	solute carrier family 44 member 4	protein-coding	2.83675
chr6	45677876	45678376	Intergenic	Intergenic	227208	NR_045674	53405	Hs.485489	NM_016929	ENSG00000112782	CLIC5	DFNB102|DFNB103|MST130|MSTP130	chloride intracellular channel 5	protein-coding	3.25703
chr3	187570754	187571254	Intergenic	L2c|LINE|L2	-107491	NM_001706	604	Hs.478588	NM_001706	ENSG00000113916	BCL6	BCL5|BCL6A|LAZ3|ZBTB27|ZNF51	B-cell CLL/lymphoma 6	protein-coding	4.53209
chr17	66308669	66309169	intron (NM_001267727, intron 2 of 11)	intron (NM_001267727, intron 2 of 11)	21283	NM_001267727	22901	Hs.437249	NM_014960	ENSG00000141337	ARSG	-	arylsulfatase G	protein-coding	3.19708
chr6	149775041	149775963	intron (NM_207360, intron 4 of 5)	intron (NM_207360, intron 4 of 5)	30646	NM_207360	340152	Hs.632618	NM_207360	ENSG00000178199	ZC3H12D	C6orf95|MCPIP4|TFL|dJ281H8.1|p34	zinc finger CCCH-type containing 12D	protein-coding	3.37117
chr8	101774008	101774508	Intergenic	Intergenic	-39943	NM_002568	26986	Hs.387804	NM_002568	ENSG00000070756	PABPC1	PAB1|PABP|PABP1|PABPC2|PABPL1	poly(A) binding protein cytoplasmic 1	protein-coding	3.12556
chr17	12185316	12185816	Intergenic	Intergenic	200350	NR_030613	100126313		NR_030613	ENSG00000266297	MIR744	MIRN744|hsa-mir-744|mir-744	microRNA 744	ncRNA	2.3861
chr1	145455271	145456238	TTS (NM_032305)	TTS (NM_032305)	14653	NM_001330685	84265	Hs.591456	NM_032305	ENSG00000121851	POLR3GL	RPC32HOM|flj32422	RNA polymerase III subunit G like	protein-coding	3.12729
chr4	681441	681941	intron (NM_032219, intron 1 of 9)	intron (NM_032219, intron 1 of 9)	1539	NM_032219	84179	Hs.567612	NM_032219	ENSG00000169026	MFSD7	LP2561	major facilitator superfamily domain containing 7	protein-coding	2.36465
chr12	110024220	110024720	intron (NM_001114185, intron 6 of 10)	intron (NM_001114185, intron 6 of 10)	12970	NM_001114185	4598	Hs.130607	NM_000431	ENSG00000110921	MVK	LRBP|MK|MVLK|POROK3	mevalonate kinase	protein-coding	3.54443
chr4	187686776	187687508	Intergenic	Intergenic	-42155	NM_005245	2195	Hs.481371	NM_005245	ENSG00000083857	FAT1	CDHF7|CDHR8|FAT|ME5|hFat1	FAT atypical cadherin 1	protein-coding	3.47716
chr14	97846912	97847412	Intergenic	Intergenic	-77991	NR_110165	101929241	Hs.650839	NR_110165	ENSG00000246084	LOC101929241	-	uncharacterized LOC101929241	ncRNA	3.55154
chr7	37941443	37942141	Intergenic	Intergenic	14733	NM_003014	6424	Hs.658169	NM_003014	ENSG00000106483	SFRP4	FRP-4|FRPHE|PYL|sFRP-4	secreted frizzled related protein 4	protein-coding	4.03277
chr3	111407225	111407725	intron (NM_001185106, intron 1 of 4)	MER77|LTR|ERVL	-11195	NR_046733	100874115	Hs.626740	NR_046733		PLCXD2-AS1	-	PLCXD2 antisense RNA 1	ncRNA	4.20777
chr1	6168831	6169707	intron (NM_015557, intron 38 of 41)	intron (NM_015557, intron 38 of 41)	63095	NM_001199863	8514	Hs.440497	NM_003636	ENSG00000069424	KCNAB2	AKR6A5|HKvbeta2|HKvbeta2.1|HKvbeta2.2|KCNA2B|KV-BETA-2	potassium voltage-gated channel subfamily A regulatory beta subunit 2	protein-coding	2.70826
chr12	118301170	118301670	intron (NM_173598, intron 1 of 19)	MLT1D|LTR|ERVL-MaLR	104608	NM_173598	283455	Hs.375836	NM_173598	ENSG00000171435	KSR2	-	kinase suppressor of ras 2	protein-coding	2.34233
chr3	187342307	187342807	Intergenic	Intergenic	45644	NM_001048	6750	Hs.12409	NM_001048	ENSG00000157005	SST	SMST	somatostatin	protein-coding	3.05809
chr6	52182510	52183010	Intergenic	Intergenic	-33081	NM_001270472	4172	Hs.179565	NM_002388	ENSG00000112118	MCM3	HCC5|P1-MCM3|P1.h|RLFB	minichromosome maintenance complex component 3	protein-coding	3.43244
chr7	155172097	155172597	Intergenic	Intergenic	-11719	NR_103545	338436	Hs.521326	NR_103545	ENSG00000204960	BLACE	-	B-cell acute lymphoblastic leukemia expressed	ncRNA	4.51579
chr7	11579957	11580457	intron (NM_015204, intron 6 of 26)	MIR3|SINE|MIR	291617	NM_015204	221981	Hs.120855	NM_015204	ENSG00000005108	THSD7A	-	thrombospondin type 1 domain containing 7A	protein-coding	2.63106
chr22	43343049	43343549	promoter-TSS (NM_007229)	promoter-TSS (NM_007229)	-252	NM_007229	11252	Hs.162877	NM_007229	ENSG00000100266	PACSIN2	SDPII	protein kinase C and casein kinase substrate in neurons 2	protein-coding	3.0238
chr11	116735163	116735663	intron (NM_025164, intron 14 of 23)	intron (NM_025164, intron 14 of 23)	-26747	NM_001318021	335	Hs.93194	NM_000039	ENSG00000118137	APOA1	apo(a)	apolipoprotein A1	protein-coding	4.42941
chr17	41916870	41917370	Intergenic	Intergenic	-6558	NM_001330233	4356	Hs.396566	NM_001932	ENSG00000161647	MPP3	DLG3	membrane palmitoylated protein 3	protein-coding	5.10884
chr15	90364234	90364887	Intergenic	MIRb|SINE|MIR	-6489	NM_001150	290	Hs.1239	NM_001150	ENSG00000166825	ANPEP	APN|CD13|GP150|LAP1|P150|PEPN	alanyl aminopeptidase, membrane	protein-coding	2.66984
chr2	233230321	233230821	Intergenic	Intergenic	-12673	NM_001632	250	Hs.284255	NM_001632	ENSG00000163283	ALPP	ALP|PALP|PLAP|PLAP-1	alkaline phosphatase, placental	protein-coding	3.37836
chrX	117861910	117862410	intron (NM_001560, intron 1 of 10)	CpG	601	NM_001560	3597	Hs.496646	NM_001560	ENSG00000131724	IL13RA1	CD213A1|CT19|IL-13Ra|NR4	interleukin 13 receptor subunit alpha 1	protein-coding	2.63532
chr2	204548602	204549102	Intergenic	Intergenic	-22346	NM_006139	940	Hs.443123	NM_006139	ENSG00000178562	CD28	Tp44	CD28 molecule	protein-coding	3.43181
chr13	31481466	31481966	intron (NM_032849, intron 1 of 4)	intron (NM_032849, intron 1 of 4)	1404	NM_032849	84935	Hs.147880	NM_032849	ENSG00000102802	MEDAG	AWMS3|C13orf33|MEDA-4|MEDA4|hAWMS3	mesenteric estrogen dependent adipogenesis	protein-coding	3.1717
chr4	111471395	111471895	intron (NM_001977, intron 17 of 19)	intron (NM_001977, intron 17 of 19)	72609	NM_000325	5308	Hs.643588	NM_000325	ENSG00000164093	PITX2	ARP1|Brx1|IDG2|IGDS|IGDS2|IHG2|IRID2|Otlx2|PTX2|RGS|RIEG|RIEG1|RS	paired like homeodomain 2	protein-coding	3.46725
chr19	42522810	42523310	intron (NM_002088, intron 14 of 18)	L2c|LINE|L2	-24632	NM_152296	478	Hs.515427	NM_152296	ENSG00000105409	ATP1A3	AHC2|ATP1A1|CAPOS|DYT12|RDP	ATPase Na+/K+ transporting subunit alpha 3	protein-coding	2.82639
chr12	52475956	52476456	intron (NR_120437, intron 1 of 2)	intron (NR_120437, intron 1 of 2)	-2324	NR_120439	26628	Hs.524431	NR_120437	ENSG00000257542	OR7E47P	OR7E141	olfactory receptor family 7 subfamily E member 47 pseudogene	pseudo	4.04188
chr1	114665750	114666250	intron (NM_001270805, intron 3 of 7)	intron (NM_001270805, intron 3 of 7)	29062	NM_205848	148281	Hs.370963	NM_205848	ENSG00000134207	SYT6	sytVI	synaptotagmin 6	protein-coding	2.53086
chr16	70546256	70546902	intron (NM_015386, intron 4 of 18)	L2c|LINE|L2	10878	NM_015386	25839	Hs.208680	NM_015386	ENSG00000103051	COG4	CDG2J|COD1	component of oligomeric golgi complex 4	protein-coding	3.27247
chr3	11391828	11392328	intron (NM_001136031, intron 12 of 17)	MLT1H|LTR|ERVL-MaLR	78068	NM_001144912	10533	Hs.38032	NM_006395	ENSG00000197548	ATG7	APG7-LIKE|APG7L|GSA7	autophagy related 7	protein-coding	3.57432
chr8	119640533	119641033	intron (NR_038210, intron 2 of 4)	intron (NR_038210, intron 2 of 4)	-6549	NR_109794	401474	Hs.359393	NM_207506	ENSG00000177570	SAMD12	-	sterile alpha motif domain containing 12	protein-coding	3.66654
chr13	99224248	99224748	intron (NM_001032296, intron 1 of 10)	intron (NM_001032296, intron 1 of 10)	4907	NM_001286649	8428	Hs.508514	NM_003576	ENSG00000102572	STK24	HEL-S-95|MST3|MST3B|STE20|STK3	serine/threonine kinase 24	protein-coding	4.4202
chr3	132371550	132372050	intron (NM_032169, intron 1 of 19)	LTR16A2|LTR|ERVL	-1490	NM_198329	79876	Hs.170737	NM_024818	ENSG00000081307	UBA5	EIEE44|SCAR24|THIFP1|UBE1DC1	ubiquitin like modifier activating enzyme 5	protein-coding	4.04489
chr16	4724836	4725336	intron (NR_102267, intron 10 of 14)	AluSz6|SINE|Alu	3767	NR_106827	102466731		NR_106827	ENSG00000276641	MIR6769A	hsa-mir-6769a	microRNA 6769a	ncRNA	4.36419
chr11	14037205	14037705	intron (NM_006108, intron 2 of 16)	intron (NM_006108, intron 2 of 16)	53271	NM_006108	10418	Hs.643864	NM_006108	ENSG00000262655	SPON1	VSGP/F-spondin|f-spondin	spondin 1	protein-coding	5.01133
chr5	9838729	9839229	intron (NR_027112, intron 4 of 12)	intron (NR_027112, intron 4 of 12)	64957	NR_027112	285692	Hs.651487	NR_027112	ENSG00000249781	LINC02112	-	long intergenic non-protein coding RNA 2112	ncRNA	3.11597
chr2	47572022	47572522	promoter-TSS (NR_110208)	promoter-TSS (NR_110208)	-59	NR_110208	101927043	Hs.515976	NR_110207	ENSG00000234690	LOC101927043	-	uncharacterized LOC101927043	ncRNA	2.66144
chr9	116137778	116138278	5' UTR (NM_031219, exon 1 of 2)	5' UTR (NM_031219, exon 1 of 2)	313	NM_031219	81932	Hs.7739	NM_031219	ENSG00000119431	HDHD3	2810435D12Rik|C9orf158	haloacid dehalogenase like hydrolase domain containing 3	protein-coding	3.0825
chr3	30887774	30888274	intron (NM_207359, intron 6 of 14)	intron (NM_207359, intron 6 of 14)	48129	NM_207359	339896	Hs.657052	NM_207359	ENSG00000144644	GADL1	ADC|CSADC|HuADC|HuCSADC	glutamate decarboxylase like 1	protein-coding	4.38723
chr5	136643760	136644260	intron (NM_004598, intron 2 of 10)	LTR33A|LTR|ERVL	180124	NR_134246	105379192	Hs.124611	NR_134246		LOC105379192	-	uncharacterized LOC105379192	ncRNA	4.93805
chr21	42057133	42057633	intron (NM_001389, intron 3 of 32)	MER68|LTR|ERVL	-54690	NR_046774	100874326	Hs.679746	NR_046774	ENSG00000233756	DSCAM-IT1	zag4	DSCAM intronic transcript 1	ncRNA	2.52221
chr17	56612186	56612686	intron (NM_001198713, intron 1 of 11)	intron (NM_001198713, intron 1 of 11)	-2991	NM_080416	5414	Hs.287518	NM_004574	ENSG00000108387	2004-09-01	ARTS|BRADEION|CE5B3|H5|MART|PNUTL2|SEP4|hCDCREL-2|hucep-7	septin 4	protein-coding	2.56192
chr14	59093171	59093671	Intergenic	Intergenic	-7365	NR_046093	51339	Hs.48950	NM_016651	ENSG00000165617	DACT1	DAPPER|DAPPER1|DPR1|FRODO|HDPR1|THYEX3	dishevelled binding antagonist of beta catenin 1	protein-coding	3.14488
chr11	15686733	15687542	intron (NM_001293172, intron 1 of 2)	L2b|LINE|L2	21707	NM_001293172	102724957	Hs.512245	NM_001293172	ENSG00000254695	LOC102724957	-	uncharacterized LOC102724957	protein-coding	3.18604
chr10	113006998	113007498	Intergenic	MLT2B2|LTR|ERVL	170458	NM_000681	150	Hs.249159	NM_000681	ENSG00000150594	ADRA2A	ADRA2|ADRA2R|ADRAR|ALPHA2AAR|ZNF32	adrenoceptor alpha 2A	protein-coding	4.32576
chr1	24117951	24118451	intron (NM_007260, intron 1 of 9)	intron (NM_007260, intron 1 of 9)	555	NM_007260	11313	Hs.533479	NM_007260	ENSG00000011009	LYPLA2	APT-2|APT2|DJ886K2.4	lysophospholipase II	protein-coding	2.38847
chr11	63376977	63377477	intron (NM_001128203, intron 2 of 4)	intron (NM_001128203, intron 2 of 4)	4682	NM_007069	11145	Hs.502775	NM_007069	ENSG00000176485	PLA2G16	AdPLA|H-REV107-1|HRASLS3|HREV107|HREV107-1|HREV107-3|HRSL3	phospholipase A2 group XVI	protein-coding	3.14055
chr2	38238218	38238718	intron (NM_144713, intron 10 of 10)	intron (NM_144713, intron 10 of 10)	25016	NR_102712	101410544	Hs.591566	NR_102712		RMDN2-AS1	-	RMDN2 antisense RNA 1	ncRNA	2.69267
chr11	75030305	75030805	intron (NM_020251, intron 1 of 14)	L2c|LINE|L2	15675	NR_029891	442900		NR_029891	ENSG00000199090	MIR326	MIRN326|hsa-mir-326|mir-326	microRNA 326	ncRNA	5.69465
chr16	86858507	86859007	Intergenic	Intergenic	103060	NR_135183	102724344	Hs.585769	NR_135182	ENSG00000261175	LOC102724344	-	uncharacterized LOC102724344	ncRNA	2.96835
chr7	27317137	27317637	Intergenic	Intergenic	-30539	NR_120507	101410536	Hs.687800	NR_120507	ENSG00000253405	EVX1-AS	EVX1-AS1	EVX1 antisense RNA	ncRNA	3.54982
chr3	108015049	108015549	promoter-TSS (NM_001282556)	promoter-TSS (NM_001282556)	-38	NM_001282556	11148	Hs.225968	NM_007072	ENSG00000114455	HHLA2	B7-H5|B7-H7|B7H7|B7y	HERV-H LTR-associating 2	protein-coding	3.22704
chr14	64876781	64877581	intron (NM_005956, intron 2 of 27)	AluJo|SINE|Alu	22422	NM_005956	4522	Hs.652308	NM_005956	ENSG00000100714	MTHFD1	MTHFC|MTHFD	methylenetetrahydrofolate dehydrogenase, cyclohydrolase and formyltetrahydrofolate synthetase 1	protein-coding	3.61551
chr1	41246964	41247464	Intergenic	Intergenic	-2470	NM_172163	9132	Hs.473058	NM_004700	ENSG00000117013	KCNQ4	DFNA2|DFNA2A|KV7.4	potassium voltage-gated channel subfamily Q member 4	protein-coding	3.57211
chr20	33914899	33915623	intron (NM_001184977, intron 5 of 7)	MIRc|SINE|MIR	-35036	NM_178468	128876	Hs.592149	NM_178468	ENSG00000125998	FAM83C	C20orf128|dJ614O4.7	family with sequence similarity 83 member C	protein-coding	2.91769
chr17	72189086	72189586	Intergenic	Intergenic	-10459	NM_000999	6169	Hs.380953	NM_000999	ENSG00000172809	RPL38	L38	ribosomal protein L38	protein-coding	2.45162
chr14	23372521	23373021	intron (NM_001077351, intron 10 of 13)	intron (NM_001077351, intron 10 of 13)	15625	NM_001308044	55147	Hs.4997	NM_018107	ENSG00000100461	RBM23	CAPERbeta|PP239|RNPC4	RNA binding motif protein 23	protein-coding	3.32531
chr17	6584736	6585455	Intergenic	AluSg7|SINE|Alu	24058	NR_045985	100652883	Hs.549540	NR_045985		ALOX15P1	ALOX15P	arachidonate 15-lipoxygenase pseudogene 1	pseudo	3.8597
chr15	86698774	86699274	intron (NM_152336, intron 4 of 24)	MIRb|SINE|MIR	-39076	NR_120368	101929701	Hs.132570	NR_120368	ENSG00000260477	LINC01584	-	long intergenic non-protein coding RNA 1584	ncRNA	3.99281
chr5	72251038	72251997	promoter-TSS (NM_001146032)	promoter-TSS (NM_001146032)	-290	NM_138782	115548	Hs.165762	NM_138782	ENSG00000157107	FCHO2	-	FCH domain only 2	protein-coding	2.72455
chr2	115880197	115880697	intron (NM_001178037, intron 1 of 25)	MER50-int|LTR|ERV1	38473	NR_036580	389023	Hs.97540	NR_036580	ENSG00000235026	DPP10-AS1	-	DPP10 antisense RNA 1	ncRNA	3.67264
chr1	216229503	216230003	intron (NM_206933, intron 30 of 71)	MIRc|SINE|MIR	-16054	NR_125992	102723833	Hs.232072	NR_125992	ENSG00000233620	LOC102723833	-	uncharacterized LOC102723833	ncRNA	inf
chr20	48210913	48211413	Intergenic	Intergenic	-26456	NM_000961	5740	Hs.302085	NM_000961	ENSG00000124212	PTGIS	CYP8|CYP8A1|PGIS|PTGI	prostaglandin I2 synthase	protein-coding	3.93351
chr2	219287187	219287687	intron (NM_007127, intron 1 of 19)	intron (NM_007127, intron 1 of 19)	3599	NM_007127	7429	Hs.654595	NM_007127	ENSG00000127831	VIL1	D2S1471|VIL	villin 1	protein-coding	4.14214
chr13	102947548	102948048	intron (NM_001321941, intron 1 of 5)	intron (NM_001321941, intron 1 of 5)	15238	NM_001321932	2259	Hs.508616	NM_004115	ENSG00000102466	FGF14	FGF-14|FHF-4|FHF4|SCA27	fibroblast growth factor 14	protein-coding	inf
chr12	5892300	5892800	intron (NM_001278596, intron 10 of 25)	intron (NM_001278596, intron 10 of 25)	161875	NM_001278596	57101	Hs.148970	NM_020373	ENSG00000047617	ANO2	C12orf3|TMEM16B	anoctamin 2	protein-coding	3.85446
chr16	30087513	30088013	exon (NM_001303504, exon 2 of 8)	exon (NM_001303504, exon 2 of 8)	466	NM_001303506	5531	Hs.534338	NM_002720	ENSG00000149923	PPP4C	PP-X|PP4|PP4C|PPH3|PPP4|PPX	protein phosphatase 4 catalytic subunit	protein-coding	2.32681
chr5	16984068	16984568	Intergenic	Intergenic	-47933	NM_012334	4651	Hs.481720	NM_012334	ENSG00000145555	MYO10	-	myosin X	protein-coding	4.26037
chr1	70975474	70976165	Intergenic	Intergenic	98919	NM_001902	1491	Hs.19904	NM_001902	ENSG00000116761	CTH	-	cystathionine gamma-lyase	protein-coding	3.25111
chr10	101064195	101064695	Intergenic	L1MEg1|LINE|L1	-24411	NR_144311	26507	Hs.274579	NM_020348	ENSG00000119946	CNNM1	ACDP1|CLP-1	cyclin and CBS domain divalent metal cation transport mediator 1	protein-coding	4.97514
chr5	131746030	131747398	non-coding (NR_045116, exon 1 of 4)	non-coding (NR_045116, exon 1 of 4)	249	NR_045116	441108	Hs.658288	NM_001013717	ENSG00000197536	C5orf56	-	chromosome 5 open reading frame 56	ncRNA	2.36225
chr9	90847974	90848474	Intergenic	Intergenic	-98324	NM_001166137	645961	Hs.580879	NM_001166137		SPATA31C2	FAM75C2	SPATA31 subfamily C member 2	protein-coding	3.9602
chr7	55577042	55577542	intron (NM_030796, intron 2 of 4)	intron (NM_030796, intron 2 of 4)	17281	NM_001321251	81552	Hs.488307	NM_030796	ENSG00000154978	VOPP1	ECOP|GASP	vesicular, overexpressed in cancer, prosurvival protein 1	protein-coding	4.28929
chr16	70511364	70511864	intron (NM_145059, intron 20 of 23)	intron (NM_145059, intron 20 of 23)	23116	NM_145059	197258	Hs.7907	NM_145059	ENSG00000157353	FUK	1110046B12Rik	fucokinase	protein-coding	4.75562
chr1	27518452	27518952	Intergenic	Intergenic	-37081	NM_003047	6548	Hs.469116	NM_003047	ENSG00000090020	SLC9A1	APNH|LIKNS|NHE-1|NHE1|PPP1R143	solute carrier family 9 member A1	protein-coding	2.37073
chr17	10689668	10690168	intron (NR_073458, intron 1 of 3)	MIR3|SINE|MIR	17498	NR_036581	100289255	Hs.306721	NR_036581	ENSG00000263429	LINC00675	-	long intergenic non-protein coding RNA 675	ncRNA	3.26741
chr15	101968847	101969347	intron (NM_138322, intron 6 of 10)	intron (NM_138322, intron 6 of 10)	61090	NM_138323	5046	Hs.498494	NM_002570	ENSG00000140479	PCSK6	PACE4|SPC4	proprotein convertase subtilisin/kexin type 6	protein-coding	5.41627
chr6	168134678	168135178	Intergenic	Intergenic	-50461	NR_117092	441178	Hs.628956	NM_001025489	ENSG00000203688	LOC441178	-	uncharacterized LOC441178	ncRNA	4.23245
chr7	151101207	151101707	intron (NM_001284262, intron 1 of 5)	intron (NM_001284262, intron 1 of 5)	-4790	NR_034012	100131176	Hs.659231	NR_034012	ENSG00000243836	WDR86-AS1	-	WDR86 antisense RNA 1	ncRNA	2.4848
chr3	53193338	53193838	Intergenic	Intergenic	-1635	NM_212539	5580	Hs.155342	NM_006254	ENSG00000163932	PRKCD	ALPS3|CVID9|MAY1|PKCD|nPKC-delta	protein kinase C delta	protein-coding	4.52318
chr13	111494124	111494624	Intergenic	MLT1C-int|LTR|ERVL-MaLR	28281	NR_027701	283487	Hs.245390	NM_178514	ENSG00000255874	LINC00346	C13orf29|NCRNA00346	long intergenic non-protein coding RNA 346	ncRNA	2.85092
chrX	124422962	124423462	Intergenic	MSTD-int|LTR|ERVL-MaLR	-30757	NM_001195272	100129520	Hs.728728	NM_001195272	ENSG00000282815	TEX13C	-	TEX13 family member C	protein-coding	3.54874
chr10	93885944	93886444	intron (NM_014912, intron 6 of 9)	intron (NM_014912, intron 6 of 9)	116842	NM_001178137	22849	Hs.131683	NM_014912	ENSG00000107864	CPEB3	-	cytoplasmic polyadenylation element binding protein 3	protein-coding	2.5992
chr5	40991445	40991945	Intergenic	Intergenic	79749	NM_173489	133558	Hs.97714	NM_173489	ENSG00000171495	MROH2B	HEATR7B2	maestro heat like repeat family member 2B	protein-coding	4.74494
chr1	23206473	23206973	intron (NM_017449, intron 5 of 15)	intron (NM_017449, intron 5 of 15)	-17004	NR_036214	100422914		NR_036214	ENSG00000264014	MIR4253	-	microRNA 4253	ncRNA	2.6451
chr9	82239059	82239559	intron (NM_001282749, intron 5 of 18)	intron (NM_001282749, intron 5 of 18)	52621	NR_104239	7091	Hs.444213	NM_007005	ENSG00000106829	TLE4	BCE-1|BCE1|E(spI)|ESG|ESG4|GRG4|Grg-4	transducin like enhancer of split 4	protein-coding	3.36757
chr5	1374711	1375211	intron (NR_125810, intron 1 of 1)	MER66C|LTR|ERV1	5227	NR_125810	100506791	Hs.146092	NR_125810	ENSG00000250584	LINC01511	-	long intergenic non-protein coding RNA 1511	ncRNA	4.17266
chr14	90835665	90836165	Intergenic	Intergenic	-27412	NM_006888	801	Hs.282410	NM_006888	ENSG00000198668	CALM1	CALML2|CAMI|CPVT4|DD132|LQT14|PHKD|caM	calmodulin 1	protein-coding	3.31296
chr10	71400998	71401498	Intergenic	Intergenic	11245	NM_145306	219738	Hs.522992	NM_145306	ENSG00000171224	C10orf35	-	chromosome 10 open reading frame 35	protein-coding	5.75759
chr22	25798392	25798892	Intergenic	Intergenic	-21098	NM_001135772	91355	Hs.634058	NM_182492	ENSG00000100068	LRP5L	-	LDL receptor related protein 5 like	protein-coding	4.99219
chr20	31433568	31434068	intron (NM_012325, intron 5 of 6)	intron (NM_012325, intron 5 of 6)	26119	NM_012325	22919	Hs.472437	NM_012325	ENSG00000101367	MAPRE1	EB1	microtubule associated protein RP/EB family member 1	protein-coding	5.20524
chr16	84616511	84617011	intron (NM_021149, intron 3 of 3)	MIR|SINE|MIR	34941	NM_021149	23406	Hs.289092	NM_021149	ENSG00000103187	COTL1	CLP	coactosin like F-actin binding protein 1	protein-coding	3.27166
chr7	67389921	67390421	Intergenic	Intergenic	-95069	NR_120514	102723427	Hs.583491	NR_120514	ENSG00000225209	LOC102723427	-	uncharacterized LOC102723427	ncRNA	2.70431
chr15	90001593	90002269	Intergenic	Intergenic	37883	NM_001321041	51458	Hs.459284	NM_016321	ENSG00000140519	RHCG	C15orf6|PDRC2|RHGK|SLC42A3	Rh family C glycoprotein	protein-coding	3.74639
chr1	36808313	36808941	intron (NM_032017, intron 11 of 11)	intron (NM_032017, intron 11 of 11)	-18872	NM_018166	55194	Hs.87016	NM_018166	ENSG00000142694	EVA1B	C1orf78|FAM176B	eva-1 homolog B	protein-coding	2.63711
chr12	116854042	116854542	Intergenic	Intergenic	11831	NR_039683	100616309		NR_039683	ENSG00000264037	MIR4472-2	-	microRNA 4472-2	ncRNA	3.21151
chr6	17115963	17116809	intron (NM_001190766, intron 2 of 4)	intron (NM_001190766, intron 2 of 4)	13897	NM_001190766	401236	Hs.677399	NM_001190766	ENSG00000230873	STMND1	-	stathmin domain containing 1	protein-coding	2.68682
chr20	34195275	34195775	promoter-TSS (NR_119376)	promoter-TSS (NR_119376)	-41	NR_119376	80307	Hs.72222	NR_001442	ENSG00000088340	FER1L4	C20orf124	fer-1 like family member 4, pseudogene	pseudo	3.05068
chr6	39261810	39262310	Intergenic	LTR33|LTR|ERVL	20176	NM_031460	89822	Hs.162282	NM_031460	ENSG00000124780	KCNK17	K2p17.1|TALK-2|TALK2|TASK-4|TASK4	potassium two pore domain channel subfamily K member 17	protein-coding	3.37826
chr5	134713828	134714328	intron (NM_001040158, intron 2 of 8)	intron (NM_001040158, intron 2 of 8)	20850	NM_138610	9555	Hs.420272	NM_004893	ENSG00000113648	H2AFY	H2A.y|H2A/y|H2AF12M|MACROH2A1.1|mH2A1|macroH2A1.2	H2A histone family member Y	protein-coding	3.38561
chr1	40872266	40872766	exon (NM_022733, exon 2 of 10)	exon (NM_022733, exon 2 of 10)	10044	NM_001198980	64744	Hs.15200	NM_022733	ENSG00000084070	SMAP2	SMAP1L	small ArfGAP2	protein-coding	inf
chr5	62233426	62233926	Intergenic	MLT1J|LTR|ERVL-MaLR	359114	NM_181506	100130733	Hs.721348	NM_181506	ENSG00000186105	LRRC70	SLRN	leucine rich repeat containing 70	protein-coding	4.59239
chr1	24469435	24469935	promoter-TSS (NM_021258)	promoter-TSS (NM_021258)	90	NM_021258	58985	Hs.110915	NM_021258	ENSG00000142677	IL22RA1	CRF2-9|IL22R|IL22R1	interleukin 22 receptor subunit alpha 1	protein-coding	2.60164
chr2	72766169	72766865	intron (NM_001321729, intron 8 of 22)	intron (NM_001321729, intron 8 of 22)	286654	NM_015189	23233	Hs.303454	NM_015189	ENSG00000144036	EXOC6B	SEC15B|SEC15L2	exocyst complex component 6B	protein-coding	2.54744
chr3	155936048	155936548	intron (NR_046617, intron 1 of 3)	L1PBa|LINE|L1	9374	NR_046617	100874083	Hs.603823	NR_046617	ENSG00000240596	KCNAB1-AS2	-	KCNAB1 antisense RNA 2	ncRNA	3.56299
chr5	2135025	2135525	Intergenic	Intergenic	177040	NR_104616	100506858	Hs.445071	NR_104616		LOC100506858	-	uncharacterized LOC100506858	ncRNA	5.00926
chr14	96133487	96133987	intron (NR_028288, intron 4 of 7)	intron (NR_028288, intron 4 of 7)	16222	NR_028288	27004	Hs.510368	NM_012468	ENSG00000187621	TCL6	TNG1|TNG2	T-cell leukemia/lymphoma 6 (non-protein coding)	ncRNA	4.71112
chr14	55348645	55349145	intron (NM_001024024, intron 1 of 6)	intron (NM_001024024, intron 1 of 6)	-3984	NR_036194	100422984		NR_036194	ENSG00000265432	MIR4308	-	microRNA 4308	ncRNA	2.37405
chr2	225260633	225261133	intron (NM_001122779, intron 1 of 1)	intron (NM_001122779, intron 1 of 1)	5828	NM_024785	79843	Hs.147585	NM_024785	ENSG00000124019	FAM124B	-	family with sequence similarity 124 member B	protein-coding	3.04599
chr3	23915815	23916315	intron (NM_001202476, intron 2 of 4)	intron (NM_001202476, intron 2 of 4)	-42230	NM_002948	6138	Hs.381219	NM_002948	ENSG00000174748	RPL15	DBA12|EC45|L15|RPL10|RPLY10|RPYL10	ribosomal protein L15	protein-coding	3.3075
chr1	47853126	47853626	intron (NR_126355, intron 3 of 4)	intron (NR_126355, intron 3 of 4)	-28368	NM_012186	2301	Hs.112968	NM_012186	ENSG00000186790	FOXE3	CTRCT34|FKHL12|FREAC8	forkhead box E3	protein-coding	4.6562
chr15	52273637	52274137	Intergenic	Intergenic	-9889	NM_001323903	123169	Hs.567662	NM_138792	ENSG00000166477	LEO1	RDL	LEO1 homolog, Paf1/RNA polymerase II complex component	protein-coding	3.11028
chr20	59760177	59760677	Intergenic	Intergenic	-67055	NM_001794	1002	Hs.473231	NM_001794	ENSG00000179242	CDH4	CAD4|R-CAD|RCAD	cadherin 4	protein-coding	3.66462
chr10	106194035	106194854	intron (NM_001008723, intron 15 of 17)	intron (NM_001008723, intron 15 of 17)	45588	NR_120624	101927523	Hs.407539	NR_120624	ENSG00000225768	LOC101927523	-	uncharacterized LOC101927523	ncRNA	2.69573
chr11	128445716	128446216	intron (NM_001143820, intron 1 of 9)	intron (NM_001143820, intron 1 of 9)	11487	NM_001143820	2113	Hs.369438	NM_005238	ENSG00000134954	ETS1	ETS-1|EWSR2|c-ets-1|p54	ETS proto-oncogene 1, transcription factor	protein-coding	3.58404
chr14	102239122	102239622	intron (NM_001161725, intron 2 of 15)	intron (NM_001161725, intron 2 of 15)	11237	NM_001161725	5527	Hs.368264	NM_002719	ENSG00000078304	PPP2R5C	B56G|PR61G	protein phosphatase 2 regulatory subunit B'gamma	protein-coding	2.692
chr5	75912946	75913446	3' UTR (NM_004101, exon 2 of 2)	3' UTR (NM_004101, exon 2 of 2)	6042	NM_001256566	2151	Hs.42502	NM_004101	ENSG00000164220	F2RL2	PAR-3|PAR3	coagulation factor II thrombin receptor like 2	protein-coding	3.45761
chr16	67878302	67878802	TTS (NM_020457)	TTS (NM_020457)	-2083	NM_005796	10204	Hs.356630	NM_005796	ENSG00000102898	NUTF2	NTF-2|NTF2|PP15	nuclear transport factor 2	protein-coding	2.70091
chr1	1825708	1826208	Intergenic	Intergenic	-3402	NM_002074	2782	Hs.430425	NM_002074	ENSG00000078369	GNB1	MRD42	G protein subunit beta 1	protein-coding	6.14508
chr2	64518283	64518783	Intergenic	Intergenic	-49360	NR_039632	100616265		NR_039632	ENSG00000283222	MIR4433A	MIR4433|hsa-mir-4433a	microRNA 4433a	ncRNA	3.28108
chr12	53539149	53539649	Intergenic	MLT2B3|LTR|ERVL	18878	NM_001244706	51380	Hs.279815	NM_015989	ENSG00000139631	CSAD	CSD|PCAP	cysteine sulfinic acid decarboxylase	protein-coding	4.73051
chr16	67035576	67036076	intron (NM_001318506, intron 3 of 11)	intron (NM_001318506, intron 3 of 11)	1410	NM_001190201	283848	Hs.346947	NM_173815	ENSG00000172824	CES4A	CES6|CES8	carboxylesterase 4A	protein-coding	2.37013
chr19	6362360	6362860	intron (NM_006012, intron 3 of 5)	intron (NM_006012, intron 3 of 5)	1147	NM_006012	8192	Hs.515092	NM_006012	ENSG00000125656	CLPP	DFNB81|PRLTS3	caseinolytic mitochondrial matrix peptidase proteolytic subunit	protein-coding	3.6667
chr14	74990662	74991537	intron (NM_000428, intron 15 of 35)	intron (NM_000428, intron 15 of 35)	30677	NM_194279	122961	Hs.291079	NM_194279	ENSG00000165898	ISCA2	HBLD1|ISA2|MMDS4|c14_5557	iron-sulfur cluster assembly 2	protein-coding	2.55153
chr10	419325	419825	intron (NM_014974, intron 17 of 36)	LTR14B|LTR|ERVK	-91549	NR_106988	102465753		NR_106988	ENSG00000280494	MIR7641-2	B-ATF|hsa-mir-7641-2	microRNA 7641-2	ncRNA	2.58188
chr15	69379935	69380435	intron (NR_026949, intron 1 of 3)	L2c|LINE|L2	6995	NR_026949	283673	Hs.177927	NM_173610	ENSG00000212766	EWSAT1	LINC00277|NCRNA00277|TMEM84	Ewing sarcoma associated transcript 1	ncRNA	2.37808
chr12	121733909	121734833	intron (NM_172215, intron 1 of 15)	CpG	185	NM_172226	10645	Hs.297343	NM_006549	ENSG00000110931	CAMKK2	CAMKK|CAMKKB	calcium/calmodulin dependent protein kinase kinase 2	protein-coding	2.3355
chr1	15031202	15031875	intron (NM_201628, intron 1 of 14)	MLT1B|LTR|ERVL-MaLR	106326	NM_201628	23254	Hs.368823	NM_015209	ENSG00000189337	KAZN	KAZ	kazrin, periplakin interacting protein	protein-coding	3.22684
chr2	36214556	36215056	Intergenic	Intergenic	367907	NR_037631	100288911	Hs.432924	NR_037631		LOC100288911	-	uncharacterized LOC100288911	ncRNA	2.78012
chr9	132815666	132816415	promoter-TSS (NM_001287346)	promoter-TSS (NM_001287346)	56	NM_001136558	57720	Hs.512461	NM_020960	ENSG00000148358	GPR107	GCDRP|LUSTR1|bA138E2.2	G protein-coupled receptor 107	protein-coding	3.3194
chr1	180529321	180529821	intron (NR_125716, intron 1 of 2)	intron (NR_125716, intron 1 of 2)	1461	NR_125716	148756		NR_125716	ENSG00000236719	OVAAL	LINC01131|OVAL	ovarian adenocarcinoma amplified long non-coding RNA	ncRNA	3.04106
chr1	145723391	145723891	intron (NM_001039703, intron 68 of 85)	intron (NM_001039703, intron 68 of 85)	-4025	NM_001201325	5174	Hs.444751	NM_002614	ENSG00000174827	PDZK1	CAP70|CLAMP|NHERF-3|NHERF3|PDZD1	PDZ domain containing 1	protein-coding	4.53625
chr9	116474301	116474801	Intergenic	MIRb|SINE|MIR	118117	NM_001276262	5998	Hs.494875	NM_017790	ENSG00000138835	RGS3	C2PA|RGP3	regulator of G-protein signaling 3	protein-coding	4.51793
chr5	133354150	133354650	Intergenic	MER77B|LTR|ERVL	-13576	NM_003374	7416	Hs.519320	NM_003374	ENSG00000213585	VDAC1	PORIN|VDAC-1	voltage dependent anion channel 1	protein-coding	4.57213
chr20	46736099	46736599	Intergenic	Intergenic	-117488	NR_110027	101927457	Hs.445823	NR_110027		LINC01522	-	long intergenic non-protein coding RNA 1522	ncRNA	2.61677
chr20	36859764	36860264	intron (NM_001029864, intron 4 of 13)	MIRb|SINE|MIR	-28563	NR_104170	149684	Hs.628250	NR_104170	ENSG00000101425	LOC149684	-	uncharacterized LOC149684	ncRNA	3.83476
chr20	61847457	61848358	promoter-TSS (NM_017798)	promoter-TSS (NM_017798)	-370	NM_017798	54915	Hs.744852	NM_017798	ENSG00000149658	YTHDF1	C20orf21	YTH N6-methyladenosine RNA binding protein 1	protein-coding	3.04588
chr18	6370820	6371320	intron (NM_001330559, intron 1 of 18)	MER58A|DNA|hAT-Charlie	3354	NR_036205	100422840		NR_036205	ENSG00000283532	MIR4317	-	microRNA 4317	ncRNA	4.0552
chr1	12079827	12080327	intron (NM_021933, intron 1 of 9)	intron (NM_021933, intron 1 of 9)	778	NM_021933	60672	Hs.8595	NM_021933	ENSG00000116691	MIIP	IIP45	migration and invasion inhibitory protein	protein-coding	3.49216
chr1	11713227	11713727	promoter-TSS (NM_001304791)	promoter-TSS (NM_001304791)	-955	NM_183412	93611	Hs.556006	NM_033182	ENSG00000132879	FBXO44	FBG3|FBX30|FBX6A|Fbx44|Fbxo6a	F-box protein 44	protein-coding	2.32434
chr15	31631047	31631547	intron (NM_001302461, intron 1 of 1)	intron (NM_001302461, intron 1 of 1)	12239	NM_015995	51621	Hs.376443	NM_015995	ENSG00000169926	KLF13	BTEB3|FKLF2|NSLP1|RFLAT-1|RFLAT1	Kruppel like factor 13	protein-coding	3.79915
chr15	89655433	89655933	intron (NM_007011, intron 5 of 14)	intron (NM_007011, intron 5 of 14)	24302	NM_152924	11057	Hs.122337	NM_007011	ENSG00000140526	ABHD2	HS1-2|LABH2|PHPS1-2	abhydrolase domain containing 2	protein-coding	4.18734
chr9	36090970	36091805	intron (NM_021111, intron 10 of 20)	intron (NM_021111, intron 10 of 20)	-45145	NR_104641	152007	Hs.493819	NM_022343	ENSG00000122694	GLIPR2	C9orf19|GAPR-1|GAPR1	GLI pathogenesis related 2	protein-coding	2.41214
chr1	48337377	48338197	intron (NM_001194986, intron 2 of 6)	intron (NM_001194986, intron 2 of 6)	124775	NM_001194986	388630	Hs.61504	NM_001194986	ENSG00000269113	TRABD2B	TIKI2	TraB domain containing 2B	protein-coding	2.86296
chr12	107773314	107773814	intron (NM_001347944, intron 1 of 14)	intron (NM_001347944, intron 1 of 14)	59199	NM_001347944	121551	Hs.271272	NM_152322	ENSG00000151136	BTBD11	ABTB2B	BTB domain containing 11	protein-coding	3.06801
chr15	55823030	55823530	Intergenic	LTR38|LTR|ERV1	-22848	NM_001033559	161582	Hs.126403	NM_130810	ENSG00000256061	DYX1C1	CILD25|DNAAF4|DYX1|DYXC1|EKN1|RD	dyslexia susceptibility 1 candidate 1	protein-coding	5.26557
chr6	20350381	20351043	Intergenic	Intergenic	-51425	NM_001949	1871	Hs.269408	NM_001949	ENSG00000112242	E2F3	E2F-3	E2F transcription factor 3	protein-coding	2.9466
chr2	191443475	191443975	Intergenic	Intergenic	-44257	NR_136298	100131211	Hs.659824	NM_001142645	ENSG00000189362	NEMP2	TMEM194B	nuclear envelope integral membrane protein 2	protein-coding	2.40525
chr16	67916898	67917398	intron (NM_014329, intron 27 of 28)	intron (NM_014329, intron 27 of 28)	-1633	NM_198443	123904	Hs.435464	NM_198443	ENSG00000188038	NRN1L	UNQ2446	neuritin 1 like	protein-coding	3.24921
chr5	175980157	175980657	intron (NM_017675, intron 1 of 31)	intron (NM_017675, intron 1 of 31)	4064	NM_017675	54825	Hs.4205	NM_017675	ENSG00000074276	CDHR2	PCDH24|PCLKC	cadherin related family member 2	protein-coding	4.61734
chr9	88150938	88151438	Intergenic	L2b|LINE|L2	205756	NM_001286715	23287	Hs.719980	NM_015239	ENSG00000135049	AGTPBP1	CCP1|NNA1	ATP/GTP binding protein 1	protein-coding	3.08879
chr16	80299435	80300141	intron (NR_120307, intron 2 of 5)	intron (NR_120307, intron 2 of 5)	-274843	NM_001305017	83657	Hs.98849	NM_130897	ENSG00000168589	DYNLRB2	DNCL2B|DNLC2B|ROBLD2	dynein light chain roadblock-type 2	protein-coding	inf
chr1	21521290	21522009	Intergenic	MIRc|SINE|MIR	-18269	NM_001198801	8672	Hs.467084	NM_003760	ENSG00000075151	EIF4G3	eIF-4G 3|eIF4G 3|eIF4GII	eukaryotic translation initiation factor 4 gamma 3	protein-coding	5.27141
chr2	160759763	160760263	intron (NM_001198759, intron 1 of 38)	intron (NM_001198759, intron 1 of 38)	1254	NM_001198760	100526664	Hs.153563	NM_001198759	ENSG00000248672	LY75-CD302	-	LY75-CD302 readthrough	protein-coding	2.44187
chr11	65125393	65125893	TTS (NM_145719)	TTS (NM_145719)	3361	NM_145719	220359	Hs.632121	NM_145719	ENSG00000173825	TIGD3	-	tigger transposable element derived 3	protein-coding	4.96862
chr12	57495657	57496157	intron (NM_001178078, intron 13 of 21)	intron (NM_001178078, intron 13 of 21)	8182	NM_001178079	6778	Hs.524518	NM_003153	ENSG00000166888	STAT6	D12S1644|IL-4-STAT|STAT6B|STAT6C	signal transducer and activator of transcription 6	protein-coding	4.94743
chr1	201991992	201992659	Intergenic	Intergenic	12636	NM_001114309	1999	Hs.603657	NM_004433	ENSG00000163435	ELF3	EPR-1|ERT|ESE-1|ESX	E74 like ETS transcription factor 3	protein-coding	2.76031
chr1	31296096	31296596	Intergenic	Intergenic	-65663	NM_006762	7805	Hs.371021	NM_006762	ENSG00000162511	LAPTM5	CLAST6	lysosomal protein transmembrane 5	protein-coding	3.88544
chr6	39186581	39187081	intron (NM_003740, intron 1 of 4)	intron (NM_003740, intron 1 of 4)	10420	NM_003740	8645	Hs.444448	NM_003740	ENSG00000164626	KCNK5	K2p5.1|KCNK5b|TASK-2|TASK2	potassium two pore domain channel subfamily K member 5	protein-coding	2.76592
chr9	38046926	38047426	intron (NM_003028, intron 1 of 5)	intron (NM_003028, intron 1 of 5)	22034	NM_003028	6461	Hs.521482	NM_003028	ENSG00000107338	SHB	bA3J10.2	SH2 domain containing adaptor protein B	protein-coding	2.35691
chr1	21649470	21649970	intron (NM_001113348, intron 1 of 18)	intron (NM_001113348, intron 1 of 18)	22314	NM_001113348	1889	Hs.195080	NM_001397	ENSG00000117298	ECE1	ECE	endothelin converting enzyme 1	protein-coding	2.72283
chr7	1115400	1115900	intron (NM_032350, intron 2 of 4)	intron (NM_032350, intron 2 of 4)	-10793	NM_001505	2852	Hs.20961	NM_001505	ENSG00000164850	GPER1	CEPR|CMKRL2|DRY12|FEG-1|GPCR-Br|GPER|GPR30|LERGU|LERGU2|LyGPR|mER	G protein-coupled estrogen receptor 1	protein-coding	2.58648
chr9	114828115	114828615	intron (NM_001282640, intron 12 of 17)	MIRb|SINE|MIR	109212	NM_022486	64420	Hs.494827	NM_022486	ENSG00000106868	SUSD1	-	sushi domain containing 1	protein-coding	2.58546
chr10	96989001	96989932	TTS (NM_207321)	TTS (NM_207321)	35510	NM_207321	142827	Hs.134229	NM_207321	ENSG00000173124	ACSM6	C10orf129|bA310E22.3	acyl-CoA synthetase medium-chain family member 6	protein-coding	2.61323
chr10	101913082	101913582	intron (NR_144755, intron 11 of 11)	intron (NR_144755, intron 11 of 11)	32402	NM_001347860	10613	Hs.150087	NM_006459	ENSG00000107566	ERLIN1	C10orf69|Erlin-1|KE04|KEO4|SPFH1|SPG62	ER lipid raft associated 1	protein-coding	4.33766
chr9	139063019	139063896	Intergenic	Intergenic	31561	NM_014564	8022	Hs.148427	NM_014564	ENSG00000107187	LHX3	CPHD3|LIM3|M2-LHX3	LIM homeobox 3	protein-coding	3.83199
chr5	136957829	136958329	intron (NM_017415, intron 14 of 14)	intron (NM_017415, intron 14 of 14)	25259	NR_030588	100126343		NR_030588	ENSG00000216009	MIR874	MIRN874|hsa-mir-874|mir-874	microRNA 874	ncRNA	2.47763
chr11	15074623	15075389	Intergenic	Intergenic	-20140	NM_000728	797	Hs.534305	NM_000728	ENSG00000175868	CALCB	CALC2|CGRP-II|CGRP2	calcitonin related polypeptide beta	protein-coding	3.18043
chr19	8459271	8459771	intron (NM_004218, intron 1 of 4)	intron (NM_004218, intron 1 of 4)	-3946	NR_038237	100507567	Hs.637720	NR_038237	ENSG00000269386	RAB11B-AS1	-	RAB11B antisense RNA 1	ncRNA	2.59901
chr1	28425570	28426070	Intergenic	Intergenic	-10672	NM_001282560	2140	Hs.185774	NM_001990	ENSG00000158161	EYA3	-	EYA transcriptional coactivator and phosphatase 3	protein-coding	4.01373
chr6	52484807	52485307	Intergenic	L2a|LINE|L2	42961	NR_103447	401264	Hs.544586	NR_103446	ENSG00000225791	TRAM2-AS1	-	TRAM2 antisense RNA 1 (head to head)	ncRNA	inf
chr11	34339910	34340533	intron (NM_145804, intron 1 of 16)	intron (NM_145804, intron 1 of 16)	39333	NM_145804	25841	Hs.23361	NM_145804	ENSG00000166016	ABTB2	ABTB2A|BTBD22	ankyrin repeat and BTB domain containing 2	protein-coding	3.41885
chr22	43409601	43410101	intron (NM_001184970, intron 1 of 10)	intron (NM_001184970, intron 1 of 10)	1333	NM_001184970	11252	Hs.162877	NM_007229	ENSG00000100266	PACSIN2	SDPII	protein kinase C and casein kinase substrate in neurons 2	protein-coding	2.3457
chr1	234916990	234917490	Intergenic	Intergenic	57451	NR_038856	100506810	Hs.586634	NR_038856	ENSG00000227630	LINC01132	-	long intergenic non-protein coding RNA 1132	ncRNA	4.1065
chr3	100761744	100762244	Intergenic	L2b|LINE|L2	-49660	NM_015429	25890	Hs.477015	NM_015429	ENSG00000154175	ABI3BP	NESHBP|TARSH	ABI family member 3 binding protein	protein-coding	4.20181
chr6	31742872	31743372	exon (NM_025258, exon 4 of 17)	exon (NM_025258, exon 4 of 17)	1986	NM_025258	80737	Hs.558553	NM_025258	ENSG00000204396	VWA7	C6orf27|G7c|NG37	von Willebrand factor A domain containing 7	protein-coding	3.98787
chr9	38358657	38359157	Intergenic	LTR67B|LTR|ERVL	-33754	NM_000692	219	Hs.436219	NM_000692	ENSG00000137124	ALDH1B1	ALDH5|ALDHX	aldehyde dehydrogenase 1 family member B1	protein-coding	4.63575
chr16	90113355	90113855	intron (NR_027336, intron 1 of 3)	intron (NR_027336, intron 1 of 3)	428	NR_027335	100130015	Hs.431792	NR_027335	ENSG00000222019	URAHP	URAH	urate (hydroxyiso-) hydrolase, pseudogene	pseudo	2.34818
chr5	134773623	134774123	Intergenic	Intergenic	9165	NM_130848	140947	Hs.152477	NM_130848	ENSG00000251380	DCANP1	C5orf20|DCNP1	dendritic cell associated nuclear protein	protein-coding	2.6774
chr7	2662857	2663357	Intergenic	Intergenic	-8496	NM_025250	80727	Hs.440899	NM_025250	ENSG00000136295	TTYH3	-	tweety family member 3	protein-coding	5.19671
chr2	86576201	86576701	Intergenic	Intergenic	-11245	NM_001164730	65055	Hs.368884	NM_022912	ENSG00000068615	REEP1	C2orf23|HMN5B|SPG31|Yip2a	receptor accessory protein 1	protein-coding	3.54336
chr8	133928573	133929073	intron (NM_003235, intron 20 of 47)	intron (NM_003235, intron 20 of 47)	49618	NM_003235	7038	Hs.654591	NM_003235	ENSG00000042832	TG	AITD3|TGN	thyroglobulin	protein-coding	3.22208
chrY	2870118	2870618	promoter-TSS (NR_046502)	promoter-TSS (NR_046502)	299	NR_144458	107987337	Hs.571764	NR_144458		ZFY-AS1	ZFY-AS|ZFYAS	ZFY antisense RNA 1	ncRNA	3.49434
chr16	1985262	1985762	Intergenic	ERVL-B4-int|LTR|ERVL	7815	NM_016332	51734	Hs.655346	NM_016332	ENSG00000198736	MSRB1	HSPC270|SELR|SELX|SEPX1|SepR	methionine sulfoxide reductase B1	protein-coding	3.18628
chr20	49684299	49684799	Intergenic	L1MEb|LINE|L1	-44874	NM_002237	3755	Hs.118695	NM_002237	ENSG00000026559	KCNG1	K13|KCNG|KV6.1|kH2	potassium voltage-gated channel modifier subfamily G member 1	protein-coding	3.52843
chr3	120323603	120324103	Intergenic	AluJr|SINE|Alu	8725	NM_001168331	4710	Hs.304613	NM_004547	ENSG00000065518	NDUFB4	B15|CI-B15	NADH:ubiquinone oxidoreductase subunit B4	protein-coding	4.82991
chr6	31854931	31855431	intron (NM_025256, intron 14 of 26).5	intron (NM_025256, intron 14 of 26).5	-8358	NM_001178044	80736	Hs.335355	NM_025257	ENSG00000204385	SLC44A4	C6orf29|CTL4|NG22|TPPT	solute carrier family 44 member 4	protein-coding	4.71434
chr17	19289545	19290219	intron (NM_001198695, intron 2 of 5)	intron (NM_001198695, intron 2 of 5)	650	NM_002404	4239	Hs.296049	NM_002404	ENSG00000166482	MFAP4	-	microfibrillar associated protein 4	protein-coding	3.08749
chr1	32091136	32091636	intron (NM_001525, intron 8 of 8)	intron (NM_001525, intron 8 of 8)	8085	NM_001525	3061	Hs.388226	NM_001525	ENSG00000121764	HCRTR1	OX1R	hypocretin receptor 1	protein-coding	2.8385
chr11	114090564	114091064	intron (NM_001018011, intron 4 of 6)	intron (NM_001018011, intron 4 of 6)	-75721	NM_006169	4837	Hs.503911	NM_006169	ENSG00000166741	NNMT	-	nicotinamide N-methyltransferase	protein-coding	3.33514
chrX	117860885	117861784	promoter-TSS (NM_001560)	promoter-TSS (NM_001560)	-224	NM_001560	3597	Hs.496646	NM_001560	ENSG00000131724	IL13RA1	CD213A1|CT19|IL-13Ra|NR4	interleukin 13 receptor subunit alpha 1	protein-coding	2.38806
chr3	47342839	47343339	intron (NM_025010, intron 1 of 9)	L1MD2|LINE|L1	-18752	NM_022342	64147	Hs.373947	NM_022342	ENSG00000088727	KIF9	-	kinesin family member 9	protein-coding	inf
chr9	86185239	86185739	Intergenic	L2a|LINE|L2	-32141	NM_174938	257019	Hs.127535	NM_174938	ENSG00000172159	FRMD3	4.1O|EPB41L4O|EPB41LO|P410	FERM domain containing 3	protein-coding	inf
chr17	8113052	8114212	promoter-TSS (NR_132731)	promoter-TSS (NR_132731)	-65	NM_001313951	9212	Hs.442658	NM_004217	ENSG00000178999	AURKB	AIK2|AIM-1|AIM1|ARK2|AurB|IPL1|PPP1R48|STK12|STK5|aurkb-sv1|aurkb-sv2	aurora kinase B	protein-coding	2.36483
chr15	101986876	101987376	intron (NM_138322, intron 2 of 10)	intron (NM_138322, intron 2 of 10)	43061	NM_138323	5046	Hs.498494	NM_002570	ENSG00000140479	PCSK6	PACE4|SPC4	proprotein convertase subtilisin/kexin type 6	protein-coding	4.75885
chr15	75642973	75643473	intron (NR_046311, intron 3 of 10)	intron (NR_046311, intron 3 of 10)	2803	NR_030360	693216		NR_030360	ENSG00000140400	MIR631	MIRN631|hsa-mir-631	microRNA 631	ncRNA	3.24918
chr20	49294656	49295370	intron (NM_001290268, intron 1 of 21)	intron (NM_001290268, intron 1 of 21)	13054	NR_110890	140876	Hs.372578	NM_080829	ENSG00000042062	FAM65C	C20orf175|C20orf176	family with sequence similarity 65 member C	protein-coding	4.54344
chr6	85231750	85232250	Intergenic	Intergenic	-47353	NR_132100	105377880	Hs.171384	NR_132100	ENSG00000231776	LINC01611	TCONS_l2_00025430	long intergenic non-protein coding RNA 1611	ncRNA	2.3473
chr9	129957538	129958038	intron (NM_001322324, intron 12 of 17)	intron (NM_001322324, intron 12 of 17)	-68153	NM_001286779	84253	Hs.29304	NM_032293	ENSG00000136895	GARNL3	bA356B19.1	GTPase activating Rap/RanGAP domain like 3	protein-coding	2.43365
chr14	75134318	75135002	intron (NM_001039479, intron 15 of 19)	intron (NM_001039479, intron 15 of 19)	45147	NM_001039479	9870	Hs.497417	NM_014821	ENSG00000119682	AREL1	FIEL1|KIAA0317	apoptosis resistant E3 ubiquitin protein ligase 1	protein-coding	2.84872
chr5	132556732	132557232	intron (NM_015082, intron 11 of 15)	intron (NM_015082, intron 11 of 15)	169320	NM_002154	3308	Hs.90093	NM_002154	ENSG00000170606	HSPA4	APG-2|HEL-S-5a|HS24/P52|HSPH2|RY|hsp70|hsp70RY	heat shock protein family A (Hsp70) member 4	protein-coding	6.01412
chr9	108663737	108664237	Intergenic	Intergenic	207181	NM_018112	55151	Hs.411925	NM_018112	ENSG00000095209	TMEM38B	C9orf87|D4Ertd89e|OI14|TRIC-B|TRICB|bA219P18.1	transmembrane protein 38B	protein-coding	2.34728
chr7	47497626	47498126	intron (NM_022748, intron 4 of 30)	intron (NM_022748, intron 4 of 30)	123866	NM_022748	64759	Hs.520814	NM_022748	ENSG00000136205	TNS3	TEM6|TENS1	tensin 3	protein-coding	2.66216
chr16	81922182	81922682	intron (NM_002661, intron 9 of 32)	MER58A|DNA|hAT-Charlie	109569	NM_002661	5336	Hs.372303	NM_002661	ENSG00000197943	PLCG2	APLAID|FCAS3|PLC-IV|PLC-gamma-2	phospholipase C gamma 2	protein-coding	3.77279
chr1	56974054	56974554	intron (NM_003713, intron 5 of 5)	intron (NM_003713, intron 5 of 5)	70953	NM_003713	8613	Hs.405156	NM_003713	ENSG00000162407	PLPP3	Dri42|LPP3|PAP2B|PPAP2B|VCIP	phospholipid phosphatase 3	protein-coding	4.02909
chr8	143480933	143481433	intron (NM_001291931, intron 1 of 10)	intron (NM_001291931, intron 1 of 10)	3427	NM_001291931	203062	Hs.370931	NM_145003	ENSG00000171045	TSNARE1	-	t-SNARE domain containing 1	protein-coding	3.33243
chr17	79018544	79019044	intron (NM_017451, intron 1 of 14)	intron (NM_017451, intron 1 of 14)	9847	NM_006340	10458	Hs.128316	NM_006340	ENSG00000175866	BAIAP2	BAP2|FLAF3|IRSP53	BAI1 associated protein 2	protein-coding	2.51098
chr11	64610898	64611398	intron (NM_017525, intron 1 of 36)	intron (NM_017525, intron 1 of 36)	893	NM_017525	55561	Hs.293590	NM_017525	ENSG00000171219	CDC42BPG	DMPK2|HSMDPKIN|KAPPA-200|MRCKG|MRCKgamma	CDC42 binding protein kinase gamma	protein-coding	2.86798
chr5	134581371	134582361	intron (NR_037895, intron 2 of 3)	intron (NR_037895, intron 2 of 3)	2001	NR_037895	340073	Hs.434422	NR_037895	ENSG00000249647	C5orf66-AS2	-	C5orf66 antisense RNA 2	ncRNA	3.98489
chr11	14395463	14396275	Intergenic	L2c|LINE|L2	-9817	NM_001177314	22800	Hs.502004	NM_012250	ENSG00000133818	RRAS2	TC21	related RAS viral (r-ras) oncogene homolog 2	protein-coding	4.46127
chr5	148416451	148416951	intron (NM_024577, intron 8 of 16)	intron (NM_024577, intron 8 of 16)	26036	NM_024577	79628	Hs.483784	NM_024577	ENSG00000169247	SH3TC2	CMT4C|MNMN	SH3 domain and tetratricopeptide repeats 2	protein-coding	2.66294
chr15	70488067	70488810	Intergenic	Intergenic	-98183	NM_001105192	7090	Hs.287362	NM_005078	ENSG00000140332	TLE3	ESG|ESG3|GRG3|HsT18976	transducin like enhancer of split 3	protein-coding	3.75242
chr1	200860505	200861005	exon (NM_018265, exon 1 of 10)	exon (NM_018265, exon 1 of 10)	128	NM_018265	55765	Hs.518997	NM_018265	ENSG00000163362	C1orf106	-	chromosome 1 open reading frame 106	protein-coding	2.75296
chr12	102834848	102835348	intron (NM_001111285, intron 2 of 3)	L2|LINE|L2	37331	NM_001111284	3479	Hs.160562	NM_000618	ENSG00000017427	IGF1	IGF-I|IGFI|MGF	insulin like growth factor 1	protein-coding	4.57447
chr11	124587716	124588216	Intergenic	Intergenic	-21863	NM_001126181	4900	Hs.524116	NM_006176	ENSG00000154146	NRGN	RC3|hng	neurogranin	protein-coding	2.35474
chr14	90553816	90554316	intron (NM_022054, intron 1 of 1)	Tigger14a|DNA|TcMar-Tigger	25957	NM_022054	56659	Hs.510191	NM_022054	ENSG00000152315	KCNK13	K2p13.1|THIK-1|THIK1	potassium two pore domain channel subfamily K member 13	protein-coding	2.62042
chr3	41941680	41942180	intron (NR_136342, intron 12 of 34)	intron (NR_136342, intron 12 of 34)	62002	NM_001322501	54986	Hs.656192	NM_017886	ENSG00000168038	ULK4	FAM7C1|REC01035	unc-51 like kinase 4	protein-coding	2.9932
chr1	8319078	8319578	Intergenic	Intergenic	50596	NR_125998	102724539	Hs.516816	NR_125998	ENSG00000227634	LINC01714	-	long intergenic non-protein coding RNA 1714	ncRNA	3.71321
chr9	107572928	107573589	intron (NM_005502, intron 28 of 49)	intron (NM_005502, intron 28 of 49)	47237	NR_130760	55335	Hs.429294	NM_018376	ENSG00000165028	NIPSNAP3B	FP944|NIPSNAP3|SNAP1	nipsnap homolog 3B	protein-coding	4.6332
chr2	10417919	10418419	Intergenic	Intergenic	-24861	NM_002149	3241	Hs.580427	NM_002149	ENSG00000115756	HPCAL1	BDR1|HLP2|VILIP-3	hippocalcin like 1	protein-coding	4.02158
chr12	65212059	65212559	intron (NM_001330188, intron 3 of 13)	AluSc5|SINE|Alu	-6043	NM_001330186	23329	Hs.192492	NM_015279	ENSG00000111490	TBC1D30	-	TBC1 domain family member 30	protein-coding	2.74286
chr14	76327525	76328025	intron (NM_015072, intron 28 of 31)	intron (NM_015072, intron 28 of 31)	120590	NM_003239	7043	Hs.592317	NM_003239	ENSG00000119699	TGFB3	ARVD|ARVD1|LDS5|RNHF|TGF-beta3	transforming growth factor beta 3	protein-coding	4.40832
chr14	104346278	104347065	Intergenic	Intergenic	32614	NR_038436	145216	Hs.578091	NR_038436	ENSG00000258735	LINC00637	-	long intergenic non-protein coding RNA 637	ncRNA	2.56117
chr10	85899008	85900171	intron (NM_014394, intron 1 of 8)	CpG	405	NM_014394	27069	Hs.352656	NM_014394	ENSG00000165678	GHITM	DERP2|HSPC282|MICS1|My021|PTD010|TMBIM5	growth hormone inducible transmembrane protein	protein-coding	2.33926
chr17	7162343	7162843	TTS (NM_001307)	TTS (NM_001307)	3671	NM_001307	1366	Hs.513915	NM_001307	ENSG00000181885	CLDN7	CEPTRL2|CLDN-7|CPETRL2|Hs.84359|claudin-1	claudin 7	protein-coding	2.89595
chr1	204099380	204099880	TTS (NM_001297760)	TTS (NM_001297760)	-10906	NR_123739	101929441	Hs.736889	NR_123739	ENSG00000230550	LOC101929441	-	uncharacterized LOC101929441	ncRNA	4.38149
chr3	183903631	183904485	exon (NM_018358, exon 1 of 21)	exon (NM_018358, exon 1 of 21)	195	NM_018358	55324	Hs.361323	NM_018358	ENSG00000161204	ABCF3	EST201864	ATP binding cassette subfamily F member 3	protein-coding	3.17992
chr6	56762788	56763288	intron (NM_001144769, intron 3 of 96)	L2c|LINE|L2	-46324	NM_001144770	667	Hs.604915	NM_001723	ENSG00000151914	DST	BP240|BPA|BPAG1|CATX-15|CATX15|D6S1101|DMH|DT|EBSB2|HSAN6|MACF2	dystonin	protein-coding	4.72833
chr1	201978644	201979547	promoter-TSS (NM_004433)	promoter-TSS (NM_004433)	-594	NM_004433	1999	Hs.603657	NM_004433	ENSG00000163435	ELF3	EPR-1|ERT|ESE-1|ESX	E74 like ETS transcription factor 3	protein-coding	2.90743
chr7	101228091	101228778	Intergenic	AluSc8|SINE|Alu	-16149	NR_103747	100506527	Hs.535863	NR_103747	ENSG00000233123	LINC01007	-	long intergenic non-protein coding RNA 1007	ncRNA	4.58278
chr7	36197571	36198071	intron (NM_030636, intron 2 of 7)	MIRc|SINE|MIR	4985	NM_030636	80820	Hs.487994	NM_030636	ENSG00000122547	EEPD1	HSPC107	endonuclease/exonuclease/phosphatase family domain containing 1	protein-coding	3.77608
chr11	57837979	57838479	intron (NM_001005212, intron 2 of 2)	intron (NM_001005212, intron 2 of 2)	39804	NM_001005186	219952	Hs.690432	NM_001005186	ENSG00000279051	OR6Q1	OR11-226	olfactory receptor family 6 subfamily Q member 1 (gene/pseudogene)	protein-coding	3.92126
chr6	112112602	112113102	intron (NM_002037, intron 2 of 13)	MLT1C|LTR|ERVL-MaLR	-32518	NM_153048	2534	Hs.390567	NM_002037	ENSG00000010810	FYN	SLK|SYN|p59-FYN	FYN proto-oncogene, Src family tyrosine kinase	protein-coding	4.03715
chr15	73681847	73682347	Intergenic	Intergenic	-20492	NM_005477	10021	Hs.86941	NM_005477	ENSG00000138622	HCN4	SSS2	hyperpolarization activated cyclic nucleotide gated potassium channel 4	protein-coding	3.94041
chr1	87258593	87259093	Intergenic	Intergenic	88590	NM_001206653	51100	Hs.136309	NM_016009	ENSG00000097033	SH3GLB1	Bif-1|CGI-61|PPP1R70|dJ612B15.2	SH3 domain containing GRB2 like endophilin B1	protein-coding	4.61616
chr9	100556919	100557419	Intergenic	Intergenic	-58368	NM_004473	2304	Hs.159234	NM_004473	ENSG00000178919	FOXE1	FKHL15|FOXE2|HFKH4|HFKL5|NMTC4|TITF2|TTF-2|TTF2	forkhead box E1	protein-coding	3.04408
chr5	67700799	67701299	Intergenic	MLT2B4|LTR|ERVL	112653	NM_001242466	5295	Hs.132225	NM_181504	ENSG00000145675	PIK3R1	AGM7|GRB1|IMD36|p85|p85-ALPHA	phosphoinositide-3-kinase regulatory subunit 1	protein-coding	2.60668
chr20	61203670	61204170	Intergenic	Intergenic	41801	NR_029676	406923		NR_029676	ENSG00000174407	MIR133A2	MIRN133A2|mir-133a-2	microRNA 133a-2	ncRNA	2.95046
chr12	96467111	96467611	Intergenic	Intergenic	-30063	NM_001256644	4048	Hs.524648	NM_000895	ENSG00000111144	LTA4H	-	leukotriene A4 hydrolase	protein-coding	4.61213
chr19	50888326	50888826	intron (NR_046402, intron 1 of 25)	L2a|LINE|L2	996	NM_001256849	5424	Hs.279413	NM_002691	ENSG00000062822	POLD1	CDC2|CRCS10|MDPL|POLD	DNA polymerase delta 1, catalytic subunit	protein-coding	2.64703
chr2	109901777	109902277	intron (NM_001099289, intron 1 of 9)	intron (NM_001099289, intron 1 of 9)	28054	NR_036224	100423027		NR_036224	ENSG00000265965	MIR4266	-	microRNA 4266	ncRNA	2.61356
chr22	47048057	47048557	intron (NM_015124, intron 3 of 18)	MLT1D|LTR|ERVL-MaLR	32008	NM_015124	23151	Hs.475150	NM_015124	ENSG00000075240	GRAMD4	DIP|dA59H18.1|dJ439F8.1	GRAM domain containing 4	protein-coding	3.22384
chr5	151036628	151037128	Intergenic	L2a|LINE|L2	-19628	NR_109873	101927096	Hs.571023	NR_109873	ENSG00000249035	CTB-113P19.1	-	uncharacterized LOC101927096	ncRNA	4.11887
chr3	112944104	112944604	intron (NM_001301861, intron 2 of 19)	intron (NM_001301861, intron 2 of 19)	13010	NM_001301861	91653	Hs.591318	NM_033254	ENSG00000144857	BOC	CDON2	BOC cell adhesion associated, oncogene regulated	protein-coding	4.38056
chr16	58685698	58686198	Intergenic	AluSz|SINE|Alu	-22158	NM_016284	23019	Hs.460923	NM_016284	ENSG00000125107	CNOT1	AD-005|CDC39|NOT1|NOT1H	CCR4-NOT transcription complex subunit 1	protein-coding	2.39089
chr10	61792397	61792897	intron (NM_001204404, intron 43 of 43)	intron (NM_001204404, intron 43 of 43)	-71976	NR_024340	283025	Hs.522955	NM_001017982	ENSG00000235931	LINC01553	C10orf40	long intergenic non-protein coding RNA 1553	ncRNA	3.06476
chr22	19566725	19567225	Intergenic	Intergenic	-12613	NR_024381	150185	Hs.719752	NR_024381		LINC00895	-	long intergenic non-protein coding RNA 895	ncRNA	5.2524
chr22	34199316	34199816	intron (NM_133642, intron 1 of 14)	MER68|LTR|ERVL	78594	NR_038950	100506195	Hs.658872	NR_038949	ENSG00000224973	LARGE-AS1	-	LARGE antisense RNA 1	ncRNA	3.20367
chr10	64441191	64441691	Intergenic	Intergenic	-123075	NM_032804	84890	Hs.99821	NM_032804	ENSG00000181915	ADO	C10orf22	2-aminoethanethiol dioxygenase	protein-coding	4.27178
chr8	142464707	142465207	intron (NR_102363, intron 17 of 27)	LTR33|LTR|ERVL	33469	NM_032611	11156	Hs.43666	NM_007079	ENSG00000184489	PTP4A3	PRL-3|PRL-R|PRL3	protein tyrosine phosphatase type IVA, member 3	protein-coding	3.1501
chrX	48472079	48472579	Intergenic	Intergenic	16132	NM_001166426	64743	Hs.521973	NM_017883	ENSG00000101940	WDR13	MG21	WD repeat domain 13	protein-coding	3.78918
chr20	48232038	48232538	Intergenic	Intergenic	-47581	NM_000961	5740	Hs.302085	NM_000961	ENSG00000124212	PTGIS	CYP8|CYP8A1|PGIS|PTGI	prostaglandin I2 synthase	protein-coding	5.26512
chr7	155411416	155412329	Intergenic	Intergenic	25227	NR_126344	100506302	Hs.87856	NR_126344	ENSG00000216895	LOC100506302	-	uncharacterized LOC100506302	ncRNA	4.64077
chr5	176731246	176731998	promoter-TSS (NM_001031677)	promoter-TSS (NM_001031677)	859	NM_013237	27166	Hs.744904	NM_013237	ENSG00000169230	PRELID1	CGI-106|PRELI|PX19|SBBI12	PRELI domain containing 1	protein-coding	2.3478
chr5	149126972	149127472	intron (NM_133263, intron 1 of 11)	intron (NM_133263, intron 1 of 11)	14834	NR_029870	494327		NR_029870	ENSG00000199047	MIR378A	MIR378|MIRN378|hsa-mir-378|hsa-mir-378a|miRNA378	microRNA 378a	ncRNA	5.2624
chr5	10507658	10508385	intron (NR_134289, intron 1 of 2)	MER77|LTR|ERVL	1284	NR_134290	389273	Hs.519206	NR_134289	ENSG00000249160	LOC389273	-	uncharacterized LOC389273	ncRNA	3.0274
chr1	44154272	44154772	intron (NM_014663, intron 12 of 21)	intron (NM_014663, intron 12 of 21)	18490	NR_033827	100132774	Hs.655569	NR_033827		KDM4A-AS1	-	KDM4A antisense RNA 1	ncRNA	3.58602
chr9	133375187	133375687	intron (NM_000050, intron 15 of 15)	MIRb|SINE|MIR	55343	NM_000050	445	Hs.160786	NM_000050	ENSG00000130707	ASS1	ASS|CTLN1	argininosuccinate synthase 1	protein-coding	4.11968
chr15	50989508	50990182	Intergenic	Intergenic	-10833	NM_001301212	54822	Hs.512894	NM_017672	ENSG00000092439	TRPM7	ALSPDC|CHAK|CHAK1|LTRPC7|LTrpC-7|TRP-PLIK	transient receptor potential cation channel subfamily M member 7	protein-coding	3.31389
chr10	35620756	35621498	intron (NM_181698, intron 3 of 11)	intron (NM_181698, intron 3 of 11)	-4675	NM_145012	219771	Hs.14745	NM_145012	ENSG00000108100	CCNY	C10orf9|CBCP1|CCNX|CFP1	cyclin Y	protein-coding	2.68872
chr3	59998842	59999342	intron (NM_002012, intron 6 of 9)	intron (NM_002012, intron 6 of 9)	67761	NM_001320901	2272	Hs.655995	NM_002012	ENSG00000189283	FHIT	AP3Aase|FRA3B	fragile histidine triad	protein-coding	4.1491
chr11	78760875	78761375	intron (NM_001098816, intron 6 of 33)	intron (NM_001098816, intron 6 of 33)	352028	NR_030598	100126333		NR_030598	ENSG00000211997	MIR708	MIRN708|hsa-mir-708	microRNA 708	ncRNA	inf
chr11	71158311	71159120	5' UTR (NM_001360, exon 2 of 9)	5' UTR (NM_001360, exon 2 of 9)	761	NM_001163817	1717	Hs.503134	NM_001360	ENSG00000172893	DHCR7	SLOS	7-dehydrocholesterol reductase	protein-coding	2.47713
chr16	29025051	29025551	Intergenic	MER51D|LTR|ERV1	28914	NM_014387	27040	Hs.632179	NM_014387	ENSG00000213658	LAT	LAT1|pp36	linker for activation of T-cells	protein-coding	4.08587
chr17	26725318	26725818	3' UTR (NM_001242366, exon 5 of 5)	3' UTR (NM_001242366, exon 5 of 5)	7662	NM_080669	113235	Hs.446689	NM_080669	ENSG00000076351	SLC46A1	G21|HCP1|PCFT	solute carrier family 46 member 1	protein-coding	3.74845
chr3	139036457	139036957	Intergenic	Intergenic	-26154	NM_020191	56945	Hs.745001	NM_020191	ENSG00000175110	MRPS22	C3orf5|COXPD5|GIBT|GK002|MRP-S22|RPMS22	mitochondrial ribosomal protein S22	protein-coding	3.58095
chr3	43573303	43573803	intron (NM_001346469, intron 10 of 11)	intron (NM_001346469, intron 10 of 11)	89865	NM_001346467	55129	Hs.656657	NM_018075	ENSG00000160746	ANO10	SCAR10|TMEM16K	anoctamin 10	protein-coding	3.86635
chr17	74098875	74100137	exon (NM_001013839, exon 2 of 19)	exon (NM_001013839, exon 2 of 19)	146	NM_001282313	23265	Hs.514496	NM_015219	ENSG00000182473	EXOC7	2-5-3p|EX070|EXO70|EXOC1|Exo70p|YJL085W	exocyst complex component 7	protein-coding	2.48319
chr7	131845729	131846229	intron (NM_020911, intron 24 of 31)	intron (NM_020911, intron 24 of 31)	-99641	NR_134565	101928807	Hs.552131	NR_134565		LOC101928807	-	uncharacterized LOC101928807	ncRNA	4.59204
chr22	43358438	43358938	intron (NM_001184970, intron 1 of 10)	intron (NM_001184970, intron 1 of 10)	-2801	NM_001184971	11252	Hs.162877	NM_007229	ENSG00000100266	PACSIN2	SDPII	protein kinase C and casein kinase substrate in neurons 2	protein-coding	2.80286
chr17	47662899	47663399	Intergenic	Intergenic	9851	NM_007225	11248	Hs.55069	NM_007225	ENSG00000182575	NXPH3	NPH3	neurexophilin 3	protein-coding	3.14437
chr8	145137740	145138240	intron (NM_003801, intron 1 of 11)	CpG	466	NM_003801	8733	Hs.627962	NM_003801	ENSG00000197858	GPAA1	GAA1|hGAA1	glycosylphosphatidylinositol anchor attachment 1	protein-coding	2.55929
chr14	21326330	21326830	Intergenic	Intergenic	-32982	NM_002935	6037	Hs.73839	NM_002935	ENSG00000169397	RNASE3	ECP|RAF1|RNS3	ribonuclease A family member 3	protein-coding	inf
chr20	62094625	62095125	intron (NM_172107, intron 1 of 16)	intron (NM_172107, intron 1 of 16)	9155	NM_004518	3785	Hs.161851	NM_004518	ENSG00000075043	KCNQ2	BFNC|EBN|EBN1|ENB1|HNSPC|KCNA11|KV7.2	potassium voltage-gated channel subfamily Q member 2	protein-coding	4.82699
chr3	123359418	123360319	intron (NM_053027, intron 27 of 32)	intron (NM_053027, intron 27 of 32)	-20415	NM_053032	4638	Hs.477375	NM_005965	ENSG00000065534	MYLK	AAT7|KRP|MLCK|MLCK1|MLCK108|MLCK210|MSTP083|MYLK1|smMLCK	myosin light chain kinase	protein-coding	3.09238
chr20	30376350	30376850	intron (NM_012112, intron 12 of 17)	intron (NM_012112, intron 12 of 17)	-30578	NM_033118	85366	Hs.86092	NM_033118	ENSG00000101306	MYLK2	KMLC|MLCK|MLCK2|skMLCK	myosin light chain kinase 2	protein-coding	2.51529
chr16	17369118	17369618	intron (NM_022166, intron 2 of 11)	intron (NM_022166, intron 2 of 11)	141007	NR_135179	102723692	Hs.737758	NR_135179	ENSG00000261448	LOC102723692	-	uncharacterized LOC102723692	ncRNA	2.96924
chr17	7353891	7354688	intron (NM_000747, intron 7 of 10)	AluSq10|SINE|Alu	5884	NM_000747	1140	Hs.330386	NM_000747	ENSG00000170175	CHRNB1	ACHRB|CHRNB|CMS1D|CMS2A|CMS2C|SCCMS	cholinergic receptor nicotinic beta 1 subunit	protein-coding	3.95992
chr1	213148735	213149235	intron (NM_001136475, intron 6 of 6)	intron (NM_001136475, intron 6 of 6)	25123	NM_001136475	79805	Hs.96885	NM_024749	ENSG00000143494	VASH2	-	vasohibin 2	protein-coding	5.31504
chr1	205473381	205474575	5' UTR (NM_002596, exon 1 of 16)	5' UTR (NM_002596, exon 1 of 16)	294	NM_002596	5129	Hs.445402	NM_002596	ENSG00000117266	CDK18	PCTAIRE|PCTAIRE3|PCTK3	cyclin dependent kinase 18	protein-coding	3.78701
chr10	50396479	50396979	promoter-TSS (NM_001010863)	promoter-TSS (NM_001010863)	-284	NM_001288742	170371	Hs.385493	NM_001010863	ENSG00000204161	C10orf128	-	chromosome 10 open reading frame 128	protein-coding	4.38121
chr3	123372046	123372546	intron (NM_053027, intron 24 of 32)	intron (NM_053027, intron 24 of 32)	-32842	NM_053032	4638	Hs.477375	NM_005965	ENSG00000065534	MYLK	AAT7|KRP|MLCK|MLCK1|MLCK108|MLCK210|MSTP083|MYLK1|smMLCK	myosin light chain kinase	protein-coding	2.79659
chr10	120133833	120134333	Intergenic	Intergenic	17463	NR_108045	100506126	Hs.69494	NR_108045	ENSG00000232139	LINC00867	-	long intergenic non-protein coding RNA 867	ncRNA	2.55836
chr1	207925083	207926419	intron (NM_172350, intron 1 of 9)	CpG	368	NM_172353	4179	Hs.510402	NM_002389	ENSG00000117335	CD46	AHUS2|MCP|MIC10|TLX|TRA2.10	CD46 molecule	protein-coding	2.83412
chr8	144416582	144417609	promoter-TSS (NM_052963)	promoter-TSS (NM_052963)	-35	NM_052963	116447	Hs.528574	NM_052963	ENSG00000184428	TOP1MT	-	topoisomerase (DNA) I, mitochondrial	protein-coding	3.00196
chr3	197082542	197083042	Intergenic	Intergenic	-56649	NM_001290983	1739	Hs.292549	NM_004087	ENSG00000075711	DLG1	DLGH1|SAP-97|SAP97|dJ1061C18.1.1|hdlg	discs large MAGUK scaffold protein 1	protein-coding	3.40284
chr3	114131108	114131608	intron (NM_001164343, intron 8 of 11)	intron (NM_001164343, intron 8 of 11)	-28869	NM_001164342	26137	Hs.202577	NM_015642	ENSG00000181722	ZBTB20	DPZF|HOF|ODA-8S|PRIMS|ZNF288	zinc finger and BTB domain containing 20	protein-coding	3.18813
chr1	56882242	56882742	Intergenic	Intergenic	162765	NM_003713	8613	Hs.405156	NM_003713	ENSG00000162407	PLPP3	Dri42|LPP3|PAP2B|PPAP2B|VCIP	phospholipid phosphatase 3	protein-coding	4.7827
chr21	40169377	40169877	Intergenic	MIRc|SINE|MIR	-7604	NM_001256295	2114	Hs.644231	NM_005239	ENSG00000157557	ETS2	ETS2IT1	ETS proto-oncogene 2, transcription factor	protein-coding	4.84328
chr7	151304439	151304939	intron (NM_016203, intron 5 of 15)	intron (NM_016203, intron 5 of 15)	24655	NM_024429	51422	Hs.647072	NM_016203	ENSG00000106617	PRKAG2	AAKG|AAKG2|CMH6|H91620p|WPWS	protein kinase AMP-activated non-catalytic subunit gamma 2	protein-coding	2.3617
chr10	73006441	73006941	intron (NM_170744, intron 1 of 16)	intron (NM_170744, intron 1 of 16)	-28706	NR_038453	728978	Hs.646725	NR_038453	ENSG00000237512	UNC5B-AS1	-	UNC5B antisense RNA 1	ncRNA	3.27718
chr15	51826141	51826641	intron (NM_001174116, intron 13 of 42)	L3|LINE|CR1	88576	NM_015263	23312	Hs.511386	NM_015263	ENSG00000104093	DMXL2	PEPNS|RC3	Dmx like 2	protein-coding	5.09906
chr12	122057386	122057886	Intergenic	Intergenic	-6819	NM_032790	84876	Hs.55148	NM_032790		ORAI1	CRACM1|IMD9|ORAT1|TAM2|TMEM142A	ORAI calcium release-activated calcium modulator 1	protein-coding	3.88223
chr1	25193021	25193521	Intergenic	Intergenic	52636	NR_106789	102465437		NR_106789	ENSG00000278034	MIR6731	hsa-mir-6731	microRNA 6731	ncRNA	3.05391
chr6	28724220	28724720	Intergenic	Intergenic	-102218	NR_135285	387055	Hs.369401	NR_135285	ENSG00000235570	LINC00533	C6orf38|C6orf39	long intergenic non-protein coding RNA 533	ncRNA	3.4793
chr3	32218515	32219015	Intergenic	Intergenic	-61406	NM_178868	152189	Hs.154986	NM_178868	ENSG00000170293	CMTM8	CKLFSF8|CKLFSF8-V2	CKLF like MARVEL transmembrane domain containing 8	protein-coding	2.91782
chr9	34145228	34145728	Intergenic	MLT1J|LTR|ERVL-MaLR	-18707	NM_015397	25853	Hs.493750	NM_015397	ENSG00000198876	DCAF12	CT102|KIAA1892|TCC52|WDR40A	DDB1 and CUL4 associated factor 12	protein-coding	4.55179
chr19	4391664	4392316	intron (NM_003025, intron 1 of 9)	intron (NM_003025, intron 1 of 9)	8425	NM_001199944	6455	Hs.97616	NM_003025	ENSG00000141985	SH3GL1	CNSA1|EEN|SH3D2B|SH3P8	SH3 domain containing GRB2 like 1, endophilin A2	protein-coding	2.54448
chr1	24894385	24894885	intron (NM_001010980, intron 1 of 3)	intron (NM_001010980, intron 1 of 3)	12068	NM_001010980	400746	Hs.200253	NM_001010980	ENSG00000184454	NCMAP	C1orf130|MP11	non-compact myelin associated protein	protein-coding	3.52998
chr7	46608604	46609104	Intergenic	Intergenic	127866	NR_134575	730338	Hs.640207	NR_134575	ENSG00000233539	LOC730338	-	uncharacterized LOC730338	ncRNA	2.81503
chr8	143714646	143715146	Intergenic	Intergenic	-5053	NR_134305	101928087	Hs.126101	NR_134305	ENSG00000277332	LOC101928087	-	uncharacterized LOC101928087	ncRNA	4.83915
chr15	65222846	65223346	exon (NM_182703, exon 7 of 15)	exon (NM_182703, exon 7 of 15)	18995	NM_182703	348094	Hs.207157	NM_182703	ENSG00000166839	ANKDD1A	-	ankyrin repeat and death domain containing 1A	protein-coding	4.72537
chr7	98351700	98352200	Intergenic	LTR64|LTR|ERV1	105353	NM_002523	4885	Hs.3281	NM_002523	ENSG00000106236	NPTX2	NARP|NP-II|NP2	neuronal pentraxin 2	protein-coding	4.15459
chrX	14416854	14417354	Intergenic	Intergenic	-130316	NM_001118885	2742	Hs.2700	NM_002063	ENSG00000101958	GLRA2	GLR	glycine receptor alpha 2	protein-coding	2.44188
chr1	39620176	39621038	intron (NM_012090, intron 1 of 92)	intron (NM_012090, intron 1 of 92)	70768	NM_012090	23499	Hs.472475	NM_012090	ENSG00000127603	MACF1	ABP620|ACF7|MACF|OFC4	microtubule-actin crosslinking factor 1	protein-coding	2.53961
chr3	127203426	127203926	Intergenic	Intergenic	52947	NR_125397	101927149	Hs.407798	NR_125397	ENSG00000239921	LINC01471	-	long intergenic non-protein coding RNA 1471	ncRNA	3.51436
chr1	26413989	26414489	Intergenic	AluSx3|SINE|Alu	-20114	NM_032588	84676	Hs.279709	NM_032588	ENSG00000158022	TRIM63	IRF|MURF1|MURF2|RNF28|SMRZ	tripartite motif containing 63	protein-coding	4.02238
chr5	17112157	17112657	Intergenic	Intergenic	-104525	NM_001271606	10409	Hs.201641	NM_006317	ENSG00000176788	BASP1	CAP-23|CAP23|NAP-22|NAP22	brain abundant membrane attached signal protein 1	protein-coding	3.38492
chr2	131591512	131592012	Intergenic	Intergenic	77898	NM_001105195	205147	Hs.369289	NM_152698	ENSG00000178171	AMER3	FAM123C	APC membrane recruitment protein 3	protein-coding	3.25204
chr14	89001528	89002028	intron (NM_007039, intron 2 of 18)	MIRc|SINE|MIR	19345	NM_007039	11099	Hs.437040	NM_007039	ENSG00000070778	PTPN21	PTPD1|PTPRL10	protein tyrosine phosphatase, non-receptor type 21	protein-coding	4.81429
chr15	60683105	60683785	intron (NM_001136015, intron 1 of 13)	MIRc|SINE|MIR	6740	NM_004039	302	Hs.511605	NM_004039	ENSG00000182718	ANXA2	ANX2|ANX2L4|CAL1H|HEL-S-270|LIP2|LPC2|LPC2D|P36|PAP-IV	annexin A2	protein-coding	2.47106
chr20	32472056	32472556	Intergenic	Intergenic	73196	NM_176812	128866	Hs.472471	NM_176812	ENSG00000101421	CHMP4B	C20orf178|CHMP4A|CTPP3|CTRCT31|SNF7|SNF7-2|Shax1|VPS32B|Vps32-2|dJ553F4.4	charged multivesicular body protein 4B	protein-coding	2.9124
chr1	207913410	207913910	Intergenic	AluSz6|SINE|Alu	-11723	NM_002389	4179	Hs.510402	NM_002389	ENSG00000117335	CD46	AHUS2|MCP|MIC10|TLX|TRA2.10	CD46 molecule	protein-coding	2.80855
chr10	110342130	110343082	Intergenic	Intergenic	-513555	NR_125760	103695365	Hs.648991	NR_125760	ENSG00000229981	LINC01435	TCONS_00018040	long intergenic non-protein coding RNA 1435	ncRNA	2.32249
chr19	49378378	49379365	exon (NM_014330, exon 3 of 3)	exon (NM_014330, exon 3 of 3)	3223	NM_014330	23645	Hs.631593	NM_014330	ENSG00000087074	PPP1R15A	GADD34	protein phosphatase 1 regulatory subunit 15A	protein-coding	3.01057
chr4	10125212	10125712	Intergenic	Intergenic	-6889	NM_005112	9948	Hs.128548	NM_005112	ENSG00000071127	WDR1	AIP1|HEL-S-52|NORI-1	WD repeat domain 1	protein-coding	3.95888
chr5	168629880	168630380	intron (NM_003062, intron 3 of 35)	intron (NM_003062, intron 3 of 35)	60568	NR_030311	693170		NR_030311	ENSG00000207619	MIR585	MIRN585|hsa-mir-585|mir-585	microRNA 585	ncRNA	5.09447
chr1	47676303	47676803	Intergenic	L2c|LINE|L2	-20782	NM_005764	10158	Hs.431099	NM_005764	ENSG00000162366	PDZK1IP1	DD96|MAP17|SPAP	PDZK1 interacting protein 1	protein-coding	3.73003
chr3	48655558	48656058	Intergenic	LTR10E|LTR|ERV1	3381	NM_001008269	440955	Hs.631922	NM_001008269	ENSG00000183396	TMEM89	-	transmembrane protein 89	protein-coding	3.28013
chr11	70828313	70828813	intron (NM_012309, intron 3 of 22)	MER21C|LTR|ERVL	107279	NM_012309	22941	Hs.268726	NM_012309	ENSG00000162105	SHANK2	AUTS17|CORTBP1|CTTNBP1|ProSAP1|SHANK|SPANK-3	SH3 and multiple ankyrin repeat domains 2	protein-coding	2.80006
chr6	2427177	2427677	Intergenic	Intergenic	181440	NR_046229	100508120	Hs.188825	NR_046229		GMDS-AS1	-	GMDS antisense RNA 1 (head to head)	ncRNA	3.00015
chr8	123908085	123908585	intron (NM_014943, intron 2 of 3)	intron (NM_014943, intron 2 of 3)	114434	NM_014943	22882	Hs.377090	NM_014943	ENSG00000178764	ZHX2	AFR1|RAF	zinc fingers and homeoboxes 2	protein-coding	4.26648
chr5	134998435	134998935	Intergenic	Intergenic	-9061	NR_027127	340074	Hs.434633	NR_027127	ENSG00000251045	LINC01959	-	long intergenic non-protein coding RNA 1959	ncRNA	4.92566
chr10	75558377	75558877	intron (NM_001242487, intron 20 of 25)	intron (NM_001242487, intron 20 of 25)	2530	NR_038357	100507331	Hs.631828	NR_038357	ENSG00000272589	ZSWIM8-AS1	-	ZSWIM8 antisense RNA 1	ncRNA	2.87212
chr14	31277597	31278097	Intergenic	L2a|LINE|L2	-65894	NM_001135058	1690	Hs.21016	NM_004086	ENSG00000100473	COCH	COCH-5B2|COCH5B2|DFNA9	cochlin	protein-coding	5.35397
chr11	116941890	116942390	intron (NM_025164, intron 1 of 23)	intron (NM_025164, intron 1 of 23)	26991	NM_025164	23387	Hs.167451	NM_025164	ENSG00000160584	SIK3	L19|QSK|SIK-3	SIK family kinase 3	protein-coding	4.51671
chr10	119658714	119659214	Intergenic	Intergenic	147150	NM_014904	22841	Hs.173656	NM_014904	ENSG00000107560	RAB11FIP2	Rab11-FIP2|nRip11	RAB11 family interacting protein 2	protein-coding	3.60907
chr9	131854687	131855187	Intergenic	AluSq2|SINE|Alu	11554	NR_072983	57171	Hs.21701	NM_020438	ENSG00000167130	DOLPP1	LSFR2	dolichyldiphosphatase 1	protein-coding	2.73287
chr1	106207084	106207584	Intergenic	ERVL-B4-int|LTR|ERVL	-45777	NR_125955	101928476	Hs.563856	NR_125954	ENSG00000230768	LINC01676	-	long intergenic non-protein coding RNA 1676	ncRNA	2.77832
chr10	73127018	73127518	Intergenic	Intergenic	-29423	NM_001171931	64072	Hs.656032	NM_022124	ENSG00000107736	CDH23	CDHR23|USH1D	cadherin related 23	protein-coding	4.25471
chr17	57838964	57839612	intron (NM_001329401, intron 4 of 9)	L1MEc|LINE|L1	-54329	NM_016077	51651	Hs.12677	NM_016077	ENSG00000141378	PTRH2	BIT1|CFAP37|CGI-147|IMNEPD|PTH|PTH 2|PTH2	peptidyl-tRNA hydrolase 2	protein-coding	2.4727
chr6	158253241	158253741	intron (NM_016224, intron 1 of 17)	intron (NM_016224, intron 1 of 17)	9288	NM_016224	51429	Hs.191213	NM_016224	ENSG00000130340	SNX9	SDP1|SH3PX1|SH3PXD3A|WISP	sorting nexin 9	protein-coding	3.37772
chr7	38039288	38040233	Intergenic	Intergenic	78840	NM_001242948	54749	Hs.563491	NM_017549	ENSG00000086289	EPDR1	EPDR|MERP-1|MERP1|UCC1	ependymin related 1	protein-coding	2.92727
chr20	44904544	44905044	intron (NM_021248, intron 1 of 11)	intron (NM_021248, intron 1 of 11)	32343	NM_021248	64405	Hs.472861	NM_021248	ENSG00000149654	CDH22	C20orf25|dJ998H6.1	cadherin 22	protein-coding	5.2779
chr1	209783040	209783540	intron (NM_020439, intron 9 of 12)	intron (NM_020439, intron 9 of 12)	13565	NR_036213	100422894		NR_036213	ENSG00000196878	MIR4260	-	microRNA 4260	ncRNA	4.02441
chr12	31158786	31159437	Intergenic	Intergenic	-67667	NM_004399	1663	Hs.443960	NM_004399	ENSG00000013573	DDX11	CHL1|CHLR1|KRG2|WABS	DEAD/H-box helicase 11	protein-coding	2.81117
chr11	77715682	77716182	Intergenic	MLT1D|LTR|ERVL-MaLR	-10215	NM_033547	92105	Hs.533723	NM_033547	ENSG00000149262	INTS4	INT4|MST093	integrator complex subunit 4	protein-coding	3.74986
chr12	3050602	3051102	TTS (NM_003324)	TTS (NM_003324)	-17626	NM_003213	7004	Hs.94865	NM_003213	ENSG00000197905	TEAD4	EFTR-2|RTEF1|TCF13L1|TEF-3|TEF3|TEFR-1|hRTEF-1B	TEA domain transcription factor 4	protein-coding	5.24129
chr14	60296325	60296825	intron (NM_021136, intron 1 of 8)	MLT1I|LTR|ERVL-MaLR	40982	NM_021136	6252	Hs.368626	NM_021136	ENSG00000139970	RTN1	NSP	reticulon 1	protein-coding	3.85462
chr6	169501020	169501520	Intergenic	HERVL-int|LTR|ERVL	33389	NR_134619	102724357	Hs.129310	NR_134619	ENSG00000234519	LOC102724357	-	uncharacterized LOC102724357	ncRNA	6.06247
chr12	102091984	102092484	intron (NM_020244, intron 1 of 8)	CpG	817	NM_020244	56994	Hs.293077	NM_020244	ENSG00000111666	CHPT1	CPT|CPT1	choline phosphotransferase 1	protein-coding	2.75629
chr14	65472442	65472942	TTS (NM_001271069)	TTS (NM_001271069)	19185	NM_002028	2342	Hs.325531	NM_002028	ENSG00000257365	FNTB	FPTB	farnesyltransferase, CAAX box, beta	protein-coding	3.39254
chr17	79773173	79773673	Intergenic	Intergenic	11415	NM_000160	2642	Hs.208	NM_000160	ENSG00000215644	GCGR	GGR|GL-R	glucagon receptor	protein-coding	3.61688
chr2	27244112	27244788	intron (NM_001303050, intron 1 of 6)	L2b|LINE|L2	6828	NM_001303050	22924	Hs.515860	NM_012326	ENSG00000084764	MAPRE3	EB3|EBF3|EBF3-S|RP3	microtubule associated protein RP/EB family member 3	protein-coding	2.9685
chr22	36283283	36283783	intron (NM_001082578, intron 2 of 13)	L2c|LINE|L2	-46903	NM_014309	23543	Hs.282998	NM_014309	ENSG00000100320	RBFOX2	FOX2|Fox-2|HNRBP2|HRNBP2|RBM9|RTA|dJ106I20.3|fxh	RNA binding protein, fox-1 homolog 2	protein-coding	4.68227
chr20	39861599	39862099	intron (NM_015035, intron 2 of 3)	intron (NM_015035, intron 2 of 3)	64186	NR_106931	102466912		NR_106931	ENSG00000276169	MIR6871	hsa-mir-6871	microRNA 6871	ncRNA	4.36462
chr1	41980640	41981262	intron (NM_001127714, intron 6 of 7)	intron (NM_001127714, intron 6 of 7)	-30597	NM_001956	1907	Hs.1407	NM_001956	ENSG00000127129	EDN2	ET-2|ET2|PPET2	endothelin 2	protein-coding	2.55065
chr5	149738261	149738761	intron (NM_001135244, intron 1 of 25)	AluJr4|SINE|Alu	1309	NM_001008657	6949	Hs.519672	NM_000356	ENSG00000070814	TCOF1	MFD1|TCS|TCS1|treacle	treacle ribosome biogenesis factor 1	protein-coding	4.27236
chr16	82557228	82557932	Intergenic	Intergenic	-102819	NM_001220490	1012	Hs.654386	NM_001257	ENSG00000140945	CDH13	CDHH|P105	cadherin 13	protein-coding	3.4184
chr1	154162949	154163449	intron (NR_103460, intron 3 of 3)	intron (NR_103460, intron 3 of 3)	1344	NR_103460	7170	Hs.535581	NM_152263	ENSG00000143549	TPM3	CAPM1|CFTD|HEL-189|HEL-S-82p|NEM1|OK/SW-cl.5|TM-5|TM3|TM30|TM30nm|TM5|TPMsk3|TRK|hscp30	tropomyosin 3	protein-coding	4.70778
chr7	31161592	31162092	Intergenic	MER4A|LTR|ERV1	69766	NM_001199636	117	Hs.377783	NM_001118	ENSG00000078549	ADCYAP1R1	PAC1|PAC1R|PACAPR|PACAPRI	ADCYAP receptor type I	protein-coding	5.35969
chr1	202015887	202016641	Intergenic	Intergenic	36574	NM_001114309	1999	Hs.603657	NM_004433	ENSG00000163435	ELF3	EPR-1|ERT|ESE-1|ESX	E74 like ETS transcription factor 3	protein-coding	4.52909
chr15	85403318	85403818	intron (NM_020778, intron 9 of 13)	intron (NM_020778, intron 9 of 13)	-24324	NM_001321721	9154	Hs.459187	NM_004213	ENSG00000156222	SLC28A1	CNT1|HCNT1	solute carrier family 28 member 1	protein-coding	4.17376
chr17	31270778	31271399	Intergenic	Intergenic	16161	NM_001033504	26022	Hs.3447	NM_015544	ENSG00000006042	TMEM98	TADA1	transmembrane protein 98	protein-coding	4.32685
chr15	56553891	56554391	Intergenic	LTR41|LTR|ERVL	-18658	NM_022841	64864	Hs.745089	NM_022841	ENSG00000181827	RFX7	RFXDC2	regulatory factor X7	protein-coding	3.35805
chr7	157195992	157196492	intron (NM_058246, intron 8 of 9)	AluSx3|SINE|Alu	-62683	NR_110157	101927914	Hs.623826	NR_110157	ENSG00000234210	LOC101927914	-	uncharacterized LOC101927914	ncRNA	3.80671
chr7	1121647	1122147	intron (NM_032350, intron 2 of 4)	intron (NM_032350, intron 2 of 4)	-4546	NM_001505	2852	Hs.20961	NM_001505	ENSG00000164850	GPER1	CEPR|CMKRL2|DRY12|FEG-1|GPCR-Br|GPER|GPR30|LERGU|LERGU2|LyGPR|mER	G protein-coupled estrogen receptor 1	protein-coding	2.44606
chr1	165606575	165607075	intron (NM_004528, intron 1 of 5)	intron (NM_004528, intron 1 of 5)	6715	NM_004528	4259	Hs.191734	NM_004528	ENSG00000143198	MGST3	GST-III	microsomal glutathione S-transferase 3	protein-coding	4.61538
chr11	821172	821672	intron (NM_020376, intron 2 of 9)	intron (NM_020376, intron 2 of 9)	2521	NM_020376	57104	Hs.654697	NM_020376	ENSG00000177666	PNPLA2	1110001C14Rik|ATGL|FP17548|PEDF-R|TTS-2.2|TTS2|iPLA2zeta	patatin like phospholipase domain containing 2	protein-coding	2.97132
chr1	213743752	213744252	Intergenic	Intergenic	-354090	NR_046189	100861504	Hs.742586	NR_046189		LINC00538	PROX1UT|Yiya	long intergenic non-protein coding RNA 538	ncRNA	3.53616
chr8	131378382	131378882	intron (NM_001247996, intron 2 of 30)	intron (NM_001247996, intron 2 of 30)	-69853	NR_002765	29065	Hs.639318	NR_002765		ASAP1-IT1	ASAP1-IT|ASAP1IT|ASAP1IT1|DDEF1IT1|HSPC054|NCRNA00050	ASAP1 intronic transcript 1	ncRNA	3.8672
chr2	119007928	119008428	Intergenic	Intergenic	-64216	NR_144530	100506797	Hs.116176	NR_144530		LOC100506797	-	uncharacterized LOC100506797	ncRNA	2.32602
chr11	11647641	11648141	Intergenic	L2b|LINE|L2	-4330	NM_198516	374378	Hs.655152	NM_198516	ENSG00000110328	GALNT18	GALNACT18|GALNT15|GALNTL4|GalNAc-T15|GalNAc-T18	polypeptide N-acetylgalactosaminyltransferase 18	protein-coding	2.62908
chr18	71901552	71902052	Intergenic	Intergenic	57449	NM_001914	1528	Hs.465413	NM_001914	ENSG00000166347	CYB5A	CYB5|MCB5	cytochrome b5 type A	protein-coding	2.70806
chr9	131637928	131638428	intron (NM_001287390, intron 1 of 14)	intron (NM_001287390, intron 1 of 14)	6176	NM_001287390	883	Hs.495250	NM_004059	ENSG00000171097	KYAT1	CCBL1|GTK|KAT1|KATI	kynurenine aminotransferase 1	protein-coding	3.11598
chr5	130578306	130578806	Intergenic	Intergenic	-21146	NM_001038702	56990	Hs.508829	NM_020240	ENSG00000158985	CDC42SE2	SPEC2	CDC42 small effector 2	protein-coding	2.4992
chr5	124169426	124169926	Intergenic	Intergenic	-88871	NM_020747	57507	Hs.266616	NM_020747	ENSG00000168916	ZNF608	NY-REN-36	zinc finger protein 608	protein-coding	inf
chr12	122028364	122028864	Intergenic	Intergenic	-5820	NR_049838	100847078		NR_049838	ENSG00000265470	MIR548AQ	-	microRNA 548aq	ncRNA	3.05907
chr14	103009699	103010199	Intergenic	Intergenic	3968	NR_036192	100422954		NR_036192	ENSG00000266015	MIR4309	-	microRNA 4309	ncRNA	4.06135
chr1	69887055	69887555	Intergenic	MLT1E1A-int|LTR|ERVL-MaLR	-145563	NM_001330635	57554	Hs.479658	NM_020794	ENSG00000033122	LRRC7	DENSIN	leucine rich repeat containing 7	protein-coding	2.98675
chrX	24445482	24445982	Intergenic	Intergenic	-37612	NM_001142386	5165	Hs.296031	NM_005391	ENSG00000067992	PDK3	CMTX6|GS1-358P8.4	pyruvate dehydrogenase kinase 3	protein-coding	inf
chr6	11761920	11762420	intron (NM_032744, intron 3 of 5)	intron (NM_032744, intron 3 of 5)	17110	NM_001143948	84830	Hs.126409	NM_032744	ENSG00000111863	ADTRP	AIG1L|C6orf105|dJ413H6.1	androgen dependent TFPI regulating protein	protein-coding	2.88651
chr3	47426555	47427055	intron (NM_001304482, intron 1 of 23)	L2a|LINE|L2	4333	NM_015466	25930	Hs.25524	NM_015466	ENSG00000076201	PTPN23	HD-PTP|HDPTP|PTP-TD14	protein tyrosine phosphatase, non-receptor type 23	protein-coding	4.26757
chr16	89568668	89569227	Intergenic	MLT1F1|LTR|ERVL-MaLR	-5848	NM_003119	6687	Hs.185597	NM_003119	ENSG00000197912	SPG7	CAR|CMAR|PGN|SPG5C	SPG7, paraplegin matrix AAA peptidase subunit	protein-coding	3.81704
chr16	14003813	14004313	Intergenic	Intergenic	-9951	NM_005236	2072	Hs.567265	NM_005236	ENSG00000175595	ERCC4	ERCC11|FANCQ|RAD1|XFEPS|XPF	ERCC excision repair 4, endonuclease catalytic subunit	protein-coding	3.45964
chr6	140000652	140001152	Intergenic	L2a|LINE|L2	-91308	NR_038399	100132735	Hs.62646	NR_038399		LOC100132735	-	uncharacterized LOC100132735	ncRNA	3.9489
chr7	46111121	46111621	Intergenic	MLT1A-int|LTR|ERVL-MaLR	-150500	NM_001013398	3486	Hs.450230	NM_000598	ENSG00000146674	IGFBP3	BP-53|IBP3	insulin like growth factor binding protein 3	protein-coding	3.39921
chr3	156022196	156022696	intron (NM_172159, intron 1 of 13)	intron (NM_172159, intron 1 of 13)	13620	NM_001308222	7881	Hs.654519	NM_003471	ENSG00000169282	KCNAB1	AKR6A3|KCNA1B|KV-BETA-1|Kvb1.3|hKvBeta3|hKvb3	potassium voltage-gated channel subfamily A member regulatory beta subunit 1	protein-coding	3.05276
chr15	91210237	91210915	intron (NR_120372, intron 2 of 3)	intron (NR_120372, intron 2 of 3)	7111	NR_120371	101929765	Hs.615348	NR_120371	ENSG00000245479	LINC01585	-	long intergenic non-protein coding RNA 1585	ncRNA	4.40485
chr20	56037522	56038022	Intergenic	L1MD3|LINE|L1	62151	NM_001269041	140690	Hs.131543	NM_080618	ENSG00000124092	CTCFL	BORIS|CT27|CTCF-T|HMGB1L1|dJ579F20.2	CCCTC-binding factor like	protein-coding	4.64952
chr4	79543627	79544127	Intergenic	Intergenic	-23271	NR_038308	100505702	Hs.235795	NR_038303		LINC01094	-	long intergenic non-protein coding RNA 1094	ncRNA	2.7352
chr9	131405831	131406331	intron (NM_052844, intron 1 of 8)	intron (NM_052844, intron 1 of 8)	13048	NM_052844	89891	Hs.495240	NM_052844	ENSG00000119333	WDR34	DIC5|FAP133|SRTD11|bA216B9.3	WD repeat domain 34	protein-coding	3.30653
chr1	211782401	211782901	Intergenic	MLT1K|LTR|ERVL-MaLR	-30499	NR_131925	105748977	Hs.553186	NR_131925		LINC01693	-	long intergenic non-protein coding RNA 1693	ncRNA	3.44805
chr6	45798141	45798641	Intergenic	Intergenic	106943	NR_045674	53405	Hs.485489	NM_016929	ENSG00000112782	CLIC5	DFNB102|DFNB103|MST130|MSTP130	chloride intracellular channel 5	protein-coding	4.38926
chr21	45611990	45612490	Intergenic	Intergenic	48647	NM_001283050	23308	Hs.14155	NM_015259	ENSG00000160223	ICOSLG	B7-H2|B7H2|B7RP-1|B7RP1|CD275|GL50|ICOS-L|ICOSL|LICOS	inducible T-cell costimulator ligand	protein-coding	3.70663
chrX	129242935	129243435	intron (NM_001127197, intron 1 of 8)	intron (NM_001127197, intron 1 of 8)	1290	NM_001421	2000	Hs.271940	NM_001421	ENSG00000102034	ELF4	ELFR|MEF	E74 like ETS transcription factor 4	protein-coding	2.44105
chr16	68400786	68401286	intron (NM_018667, intron 3 of 8)	AluSx|SINE|Alu	56019	NM_001290018	54496	Hs.640229	NM_019023	ENSG00000132600	PRMT7	SBIDDS	protein arginine methyltransferase 7	protein-coding	2.39303
chr21	43074077	43074577	Intergenic	ERV3-16A3_I-int|LTR|ERVL	-25135	NR_024367	54090	Hs.570442	NR_024367		LINC00111	C21orf21|NCRNA00111	long intergenic non-protein coding RNA 111	ncRNA	2.5833
chr5	138961601	138962101	intron (NM_181838, intron 2 of 7)	intron (NM_181838, intron 2 of 7)	21100	NM_181838	7322	Hs.108332	NM_003339	ENSG00000131508	UBE2D2	E2(17)KB2|PUBC1|UBC4|UBC4/5|UBCH4|UBCH5B	ubiquitin conjugating enzyme E2 D2	protein-coding	4.48913
chr5	17252454	17253175	intron (NM_006317, intron 1 of 1)	intron (NM_006317, intron 1 of 1)	35145	NM_006317	10409	Hs.201641	NM_006317	ENSG00000176788	BASP1	CAP-23|CAP23|NAP-22|NAP22	brain abundant membrane attached signal protein 1	protein-coding	2.90231
chr11	72869322	72869822	Intergenic	Intergenic	-16429	NM_014824	9873	Hs.744959	NM_014824	ENSG00000137478	FCHSD2	NWK|SH3MD3	FCH and double SH3 domains 2	protein-coding	5.06573
chr6	40080094	40080594	Intergenic	LTR16B1|LTR|ERVL	-178054	NR_033233	4337	Hs.357128	NM_005942	ENSG00000124615	MOCS1	MIG11|MOCOD|MOCODA	molybdenum cofactor synthesis 1	protein-coding	4.82291
chr7	155920372	155920872	Intergenic	AluSz6|SINE|Alu	165296	NM_001291913	389602	Hs.583071	NM_001291913		LOC389602	-	uncharacterized LOC389602	protein-coding	2.81008
chrX	16856778	16857278	intron (NM_018360, intron 8 of 9)	intron (NM_018360, intron 8 of 9)	30950	NM_001198719	5931	Hs.495755	NM_002893	ENSG00000102054	RBBP7	RbAp46	RB binding protein 7, chromatin remodeling factor	protein-coding	4.63211
chr17	16866135	16866635	intron (NM_012452, intron 1 of 4)	MIRb|SINE|MIR	9017	NM_012452	23495	Hs.158341	NM_012452	ENSG00000240505	TNFRSF13B	CD267|CVID|CVID2|IGAD2|RYZN|TACI|TNFRSF14B	TNF receptor superfamily member 13B	protein-coding	2.76899
chr7	44848521	44849021	Intergenic	Intergenic	12536	NM_001300981	5478	Hs.356331	NM_021130	ENSG00000196262	PPIA	CYPA|CYPH|HEL-S-69p	peptidylprolyl isomerase A	protein-coding	3.36845
chr17	28664563	28665063	Intergenic	Intergenic	-3736	NM_001319942	388364	Hs.371005	NM_206832	ENSG00000182271	TMIGD1	TMIGD|UNQ9372	transmembrane and immunoglobulin domain containing 1	protein-coding	inf
chr16	11895390	11895890	Intergenic	L2c|LINE|L2	-4526	NM_014153	29066	Hs.371856	NM_014153	ENSG00000122299	ZC3H7A	HSPC055|ZC3H7|ZC3HDC7	zinc finger CCCH-type containing 7A	protein-coding	2.6
chr3	159734670	159735170	intron (NR_108088, intron 4 of 9)	intron (NR_108088, intron 4 of 9)	-3516	NR_104132	730109	Hs.99333	NR_104132		LINC01100	-	long intergenic non-protein coding RNA 1100	ncRNA	2.77526
chr15	74019118	74019618	Intergenic	Intergenic	24448	NM_001039614	388135	Hs.40794	NM_001039614	ENSG00000205363	C15orf59	INSYN1	chromosome 15 open reading frame 59	protein-coding	6.56049
chr19	18364489	18364989	intron (NR_036575, intron 1 of 3)	intron (NR_036575, intron 1 of 3)	1490	NR_036575	729966	Hs.710873	NR_036575	ENSG00000105650	LOC729966	-	uncharacterized LOC729966	ncRNA	4.25243
chr8	103612839	103613587	Intergenic	CpG	49365	NM_024410	4956	Hs.159274	NM_024410	ENSG00000155087	ODF1	CT133|HSPB10|ODF|ODF2|ODF27|ODFP|ODFPG|ODFPGA|ODFPGB|RT7|SODF	outer dense fiber of sperm tails 1	protein-coding	2.37642
chr1	205227917	205228417	intron (NM_001331034, intron 1 of 3)	intron (NM_001331034, intron 1 of 3)	1842	NM_001331034	9911	Hs.6360	NM_014858	ENSG00000133069	TMCC2	HUCEP11	transmembrane and coiled-coil domain family 2	protein-coding	2.50036
chr1	202182265	202182893	promoter-TSS (NM_001017404)	promoter-TSS (NM_001017404)	-704	NM_001017404	59352	Hs.497402	NM_021636	ENSG00000133067	LGR6	GPCR|VTS20631	leucine rich repeat containing G protein-coupled receptor 6	protein-coding	3.14113
chr17	77268633	77269467	intron (NM_001082575, intron 3 of 14)	intron (NM_001082575, intron 3 of 14)	198031	NM_001042573	64772	Hs.29288	NM_022759	ENSG00000167280	ENGASE	-	endo-beta-N-acetylglucosaminidase	protein-coding	3.58376
chr3	58521562	58522062	intron (NM_003500, intron 1 of 14)	intron (NM_003500, intron 1 of 14)	1117	NM_003500	8309	Hs.444959	NM_003500	ENSG00000168306	ACOX2	BCOX|BRCACOX|BRCOX|THCCox	acyl-CoA oxidase 2	protein-coding	4.53452
chr6	134620414	134620914	intron (NM_001143676, intron 1 of 13)	intron (NM_001143676, intron 1 of 13)	18532	NM_001143676	6446	Hs.510078	NM_005627	ENSG00000118515	SGK1	SGK	serum/glucocorticoid regulated kinase 1	protein-coding	2.63526
chr9	89996304	89997065	Intergenic	Intergenic	-115458	NM_001288731	1612	Hs.380277	NM_004938	ENSG00000196730	DAPK1	DAPK	death associated protein kinase 1	protein-coding	2.32214
chr1	45803532	45804032	intron (NM_012222, intron 1 of 15)	L2a|LINE|L2	-1560	NM_025077	114034	Hs.525091	NM_025077	ENSG00000132773	TOE1	hCaf1z	target of EGR1, member 1 (nuclear)	protein-coding	2.34431
chr10	1016259	1017007	Intergenic	Intergenic	-17716	NM_012341	23560	Hs.215766	NM_012341	ENSG00000107937	GTPBP4	CRFG|NGB|NOG1	GTP binding protein 4	protein-coding	4.29891
chr16	401705	402205	intron (NM_003502, intron 1 of 10)	intron (NM_003502, intron 1 of 10)	721	NM_003502	8312	Hs.592082	NM_003502	ENSG00000103126	AXIN1	AXIN|PPP1R49	axin 1	protein-coding	2.55187
chr1	201497923	201498423	Intergenic	MLT2B4|LTR|ERVL	9141	NR_026667	376693	Hs.605989	NR_026667		RPS10P7	RPS10_2_147	ribosomal protein S10 pseudogene 7	pseudo	3.97297
chr5	67615824	67616324	Intergenic	Intergenic	27678	NM_001242466	5295	Hs.132225	NM_181504	ENSG00000145675	PIK3R1	AGM7|GRB1|IMD36|p85|p85-ALPHA	phosphoinositide-3-kinase regulatory subunit 1	protein-coding	3.78049
chr8	128832064	128832564	intron (NR_003367, intron 1 of 8)	intron (NR_003367, intron 1 of 8)	24106	NR_031609	100302185		NR_031609	ENSG00000249859	MIR1204	hsa-mir-1204	microRNA 1204	ncRNA	4.51326
chr11	116089635	116090135	Intergenic	Intergenic	-420254	NR_135069	101929011	Hs.733911	NR_135069	ENSG00000237937	LOC101929011	-	uncharacterized LOC101929011	ncRNA	4.04111
chr3	183874208	183875409	intron (NM_004423, intron 1 of 14)	intron (NM_004423, intron 1 of 14)	1525	NM_004423	1857	Hs.388116	NM_004423	ENSG00000161202	DVL3	DRS3	dishevelled segment polarity protein 3	protein-coding	3.01011
chr14	23126470	23126970	Intergenic	Intergenic	59573	NM_022060	63874	Hs.445665	NM_022060	ENSG00000100439	ABHD4	ABH4	abhydrolase domain containing 4	protein-coding	5.19681
chr3	156812486	156812986	intron (NR_034008, intron 1 of 2)	intron (NR_034008, intron 1 of 2)	5066	NR_034008	100498859	Hs.633655	NR_034008	ENSG00000241135	LINC00881	-	long intergenic non-protein coding RNA 881	ncRNA	3.34775
chr5	128031740	128032240	Intergenic	MIRc|SINE|MIR	-158255	NM_001999	2201	Hs.519294	NM_001999	ENSG00000138829	FBN2	CCA|DA9|EOMD	fibrillin 2	protein-coding	3.75585
chr7	27261430	27261930	Intergenic	Intergenic	-20484	NM_001989	2128	Hs.369879	NM_001989	ENSG00000106038	EVX1	EVX-1	even-skipped homeobox 1	protein-coding	4.57219
chr17	34948755	34949590	intron (NM_024308, intron 1 of 6)	intron (NM_024308, intron 1 of 6)	947	NM_024308	79154	Hs.462859	NM_024308	ENSG00000278535	DHRS11	ARPG836|SDR24C1|spDHRS11	dehydrogenase/reductase 11	protein-coding	2.81249
chr22	33345791	33346291	intron (NM_001135774, intron 3 of 13)	intron (NM_001135774, intron 3 of 13)	56765	NM_133633	8224	Hs.608750	NM_003490	ENSG00000185666	SYN3	-	synapsin III	protein-coding	5.28021
chr15	83781324	83782046	intron (NM_001330385, intron 2 of 6)	intron (NM_001330385, intron 2 of 6)	5361	NM_023003	53346	Hs.513094	NM_023003	ENSG00000136404	TM6SF1	-	transmembrane 6 superfamily member 1	protein-coding	2.97762
chr8	97280462	97280962	intron (NM_001290225, intron 1 of 10)	intron (NM_001290225, intron 1 of 10)	6598	NM_001290225	9791	Hs.292579	NM_014754	ENSG00000156471	PTDSS1	LMHD|PSS1|PSSA	phosphatidylserine synthase 1	protein-coding	3.41726
chr14	62656366	62656866	Intergenic	MER31B|LTR|ERV1	-49925	NR_104063	101954204	Hs.607093	NR_104063	ENSG00000259142	LINC00644	-	long intergenic non-protein coding RNA 644	ncRNA	3.7942
chr1	93288362	93288862	Intergenic	AluJr|SINE|Alu	-8982	NM_000969	6125	Hs.532359	NM_000969	ENSG00000122406	RPL5	DBA6|L5|MSTP030|PPP1R135	ribosomal protein L5	protein-coding	3.14775
chr19	39764217	39764717	Intergenic	AluJo|SINE|Alu	5310	NM_172138	282616	Hs.567792	NM_172138	ENSG00000183709	IFNL2	IL-28A|IL28A	interferon lambda 2	protein-coding	3.28645
chr3	10599258	10600204	Intergenic	Intergenic	-52357	NM_001330611	491	Hs.268942	NM_001683	ENSG00000157087	ATP2B2	PMCA2|PMCA2a|PMCA2i	ATPase plasma membrane Ca2+ transporting 2	protein-coding	3.00316
chr3	12955492	12955992	intron (NM_001134382, intron 8 of 14)	intron (NM_001134382, intron 8 of 14)	-29032	NR_136189	105376955	Hs.561179	NR_136189	ENSG00000232746	LINC02022	-	long intergenic non-protein coding RNA 2022	ncRNA	4.14686
chr5	79488458	79488958	intron (NM_001174071, intron 2 of 12)	intron (NM_001174071, intron 2 of 12)	63193	NR_126061	256987	Hs.288232	NM_178276	ENSG00000164300	SERINC5	C5orf12|TPO1	serine incorporator 5	protein-coding	3.93326
chr2	46504671	46505379	Intergenic	Intergenic	-19516	NM_001430	2034	Hs.468410	NM_001430	ENSG00000116016	EPAS1	ECYT4|HIF2A|HLF|MOP2|PASD2|bHLHe73	endothelial PAS domain protein 1	protein-coding	3.73801
chr15	80911730	80912230	Intergenic	Intergenic	38536	NR_049837	100847042		NR_049837	ENSG00000172379	MIR5572	-	microRNA 5572	ncRNA	4.46108
chr2	170584927	170585427	intron (NR_144936, intron 3 of 4)	Tigger6a|DNA|TcMar-Tigger	-5179	NM_144711	151230	Hs.655150	NM_144711	ENSG00000213160	KLHL23	DITHP	kelch like family member 23	protein-coding	2.3604
chr6	132384811	132385311	Intergenic	Intergenic	51342	NR_039673	100616191		NR_039673	ENSG00000265669	MIR548AJ1	-	microRNA 548aj-1	ncRNA	2.61789
chr17	4691088	4691773	promoter-TSS (NM_001014985)	promoter-TSS (NM_001014985)	-823	NM_001014985	388323	Hs.131035	NM_001014985	ENSG00000182327	GLTPD2	-	glycolipid transfer protein domain containing 2	protein-coding	3.29091
chr10	82258462	82259210	intron (NM_001128309, intron 2 of 5)	intron (NM_001128309, intron 2 of 5)	-32170	NR_120662	102723703	Hs.308615	NR_120662		LOC102723703	-	uncharacterized LOC102723703	ncRNA	2.65114
chr2	154242859	154243359	Intergenic	Intergenic	92213	NM_019845	56475	Hs.100890	NM_019845	ENSG00000177519	RPRM	REPRIMO	reprimo, TP53 dependent G2 arrest mediator candidate	protein-coding	3.82319
chr1	114706646	114707146	Intergenic	Intergenic	-10424	NM_001270805	148281	Hs.370963	NM_205848	ENSG00000134207	SYT6	sytVI	synaptotagmin 6	protein-coding	4.54991
chr19	45689890	45690390	Intergenic	L2|LINE|L2	8137	NM_212550	388552	Hs.103902	NM_212550	ENSG00000189114	BLOC1S3	BLOS3|HPS8|RP	biogenesis of lysosomal organelles complex 1 subunit 3	protein-coding	3.20528
chr11	111247281	111247781	intron (NM_006235, intron 1 of 4)	intron (NM_006235, intron 1 of 4)	2626	NM_006235	5450	Hs.654525	NM_006235	ENSG00000110777	POU2AF1	BOB1|OBF-1|OBF1|OCAB	POU class 2 associating factor 1	protein-coding	4.21085
chr15	70005341	70005841	Intergenic	Intergenic	121052	NR_126437	104472713	Hs.430824	NR_126437	ENSG00000259641	PCAT29	-	prostate cancer associated transcript 29 (non-protein coding)	ncRNA	5.57914
chr14	104387317	104388229	intron (NM_001127393, intron 1 of 4)	CpG	130	NM_001127393	9556	Hs.109052	NM_004894	ENSG00000156411	C14orf2	MP68|PLPM	chromosome 14 open reading frame 2	protein-coding	2.75334
chr21	32708440	32709238	intron (NM_003253, intron 3 of 28)	intron (NM_003253, intron 3 of 28)	222451	NM_003253	7074	Hs.517228	NM_003253	ENSG00000156299	TIAM1	-	T-cell lymphoma invasion and metastasis 1	protein-coding	3.30027
chr7	132186764	132187264	intron (NM_001105543, intron 2 of 3)	intron (NM_001105543, intron 2 of 3)	74309	NM_020911	91584	Hs.511454	NM_020911	ENSG00000221866	PLXNA4	FAYV2820|PLEXA4|PLXNA4A|PLXNA4B|PRO34003	plexin A4	protein-coding	4.37128
chr3	127528384	127528884	intron (NM_001003794, intron 2 of 7)	intron (NM_001003794, intron 2 of 7)	13091	NM_007283	11343	Hs.277035	NM_007283	ENSG00000074416	MGLL	HU-K5|HUK5|MAGL|MGL	monoglyceride lipase	protein-coding	4.64685
chr19	39542940	39543440	Intergenic	FordPrefect|DNA|hAT-Tip100	-19954	NM_178820	126433	Hs.187461	NM_178820	ENSG00000161243	FBXO27	FBG5|Fbx27	F-box protein 27	protein-coding	2.48574
chr18	2857515	2858015	intron (NM_032048, intron 2 of 7)	intron (NM_032048, intron 2 of 7)	10737	NM_032048	84034	Hs.532815	NM_032048	ENSG00000132205	EMILIN2	EMILIN-2|FOAP-10	elastin microfibril interfacer 2	protein-coding	2.60565
chrY	22560032	22560532	Intergenic	LTR25|LTR|ERV1	120832	NR_001542	246119	Hs.461175	NR_001542	ENSG00000229236	TTTY10	NCRNA00133|TTY10	testis-specific transcript, Y-linked 10 (non-protein coding)	ncRNA	2.39487
chr8	95962063	95962894	promoter-TSS (NM_033285)	promoter-TSS (NM_033285)	-864	NM_001135733	94241	Hs.492261	NM_033285	ENSG00000164938	TP53INP1	SIP|TP53DINP1|TP53INP1A|TP53INP1B|Teap|p53DINP1	tumor protein p53 inducible nuclear protein 1	protein-coding	2.98035
chr2	180129419	180129919	promoter-TSS (NM_178123)	promoter-TSS (NM_178123)	-319	NM_178123	91404	Hs.30977	NM_178123	ENSG00000187231	SESTD1	SOLO	SEC14 and spectrin domain containing 1	protein-coding	2.83483
chr15	52359448	52359948	Intergenic	FRAM|SINE|Alu	45274	NM_001306168	10017	Hs.283672	NM_020396	ENSG00000137875	BCL2L10	BCL-B|Boo|Diva|bcl2-L-10	BCL2 like 10	protein-coding	4.44601
chr3	72871238	72871738	intron (NM_018130, intron 6 of 10)	intron (NM_018130, intron 6 of 10)	26110	NM_018130	55164	Hs.606584	NM_018130	ENSG00000144736	SHQ1	GRIM-1|Shq1p	SHQ1, H/ACA ribonucleoprotein assembly factor	protein-coding	3.20274
chr14	104346278	104347065	Intergenic	Intergenic	32614	NR_038436	145216	Hs.578091	NR_038436	ENSG00000258735	LINC00637	-	long intergenic non-protein coding RNA 637	ncRNA	2.53715
chr11	66095276	66096211	Intergenic	Intergenic	8256	NM_004292	9610	Hs.1030	NM_004292	ENSG00000174791	RIN1	-	Ras and Rab interactor 1	protein-coding	3.3212
chr9	135714520	135715020	intron (NM_152572, intron 5 of 12)	intron (NM_152572, intron 5 of 12)	-38937	NM_001316898	11092	Hs.62595	NM_018956	ENSG00000165698	SPACA9	C9orf9|Mast	sperm acrosome associated 9	protein-coding	3.5195
chr14	77518494	77518994	intron (NR_110554, intron 1 of 3)	intron (NR_110554, intron 1 of 3)	11352	NR_110554	283575	Hs.651736	NR_110554	ENSG00000246548	LOC283575	-	uncharacterized LOC283575	ncRNA	3.67842
chr19	51472467	51472967	promoter-TSS (NM_001319949)	promoter-TSS (NM_001319949)	212	NM_002774	5653	Hs.79361	NM_002774	ENSG00000167755	KLK6	Bssp|Klk7|PRSS18|PRSS9|SP59|hK6	kallikrein related peptidase 6	protein-coding	3.79412
chr1	38595663	38596163	Intergenic	LTR33|LTR|ERVL	41010	NR_037432	100500801		NR_037432	ENSG00000265596	MIR3659	mir-3659	microRNA 3659	ncRNA	3.75344
chr7	156884518	156885018	Intergenic	MLT1D|LTR|ERVL-MaLR	-46887	NM_014671	9690	Hs.118351	NM_014671	ENSG00000009335	UBE3C	HECTH2	ubiquitin protein ligase E3C	protein-coding	5.23209
chr15	97580237	97580737	Intergenic	MLT2A2|LTR|ERVL	253850	NM_001304804	145946	Hs.326528	NM_173499	ENSG00000185594	SPATA8	SRG8	spermatogenesis associated 8	protein-coding	3.22079
chr7	6055350	6055850	intron (NM_006303, intron 2 of 3)	intron (NM_006303, intron 2 of 3)	5244	NM_001326611	7965	Hs.301613	NM_006303	ENSG00000106305	AIMP2	JTV-1|JTV1|P38	aminoacyl tRNA synthetase complex interacting multifunctional protein 2	protein-coding	5.09974
chr1	38520987	38521487	Intergenic	L2b|LINE|L2	-8787	NM_002699	5453	Hs.1837	NM_002699	ENSG00000185668	POU3F1	OCT6|OTF6|SCIP	POU class 3 homeobox 1	protein-coding	2.75615
chr2	178862691	178863191	intron (NM_001077197, intron 3 of 20)	intron (NM_001077197, intron 3 of 20)	74541	NM_016953	50940	Hs.570273	NM_016953	ENSG00000128655	PDE11A	PPNAD2	phosphodiesterase 11A	protein-coding	3.03041
chr12	121066680	121067180	Intergenic	LTR33|LTR|ERVL	-11492	NM_001033677	9478	Hs.458482	NM_004276	ENSG00000157782	CABP1	CALBRAIN|HCALB_BR	calcium binding protein 1	protein-coding	4.59914
chr3	487633	488133	Intergenic	HERVL-int|LTR|ERVL	-60405	NR_110739	101927193	Hs.677744	NR_110739	ENSG00000234661	CHL1-AS1	-	CHL1 antisense RNA 1	ncRNA	inf
chr1	3377295	3377795	intron (NM_014448, intron 1 of 14)	intron (NM_014448, intron 1 of 14)	6398	NM_014448	27237	Hs.87435	NM_014448	ENSG00000130762	ARHGEF16	GEF16|NBR	Rho guanine nucleotide exchange factor 16	protein-coding	3.33029
chr8	144362895	144364105	intron (NR_120683, intron 1 of 1)	LTR50|LTR|ERVL	370	NR_120682	100507316	Hs.446671	NR_120682	ENSG00000253716	MINCR	LINC01604	MYC-induced long noncoding RNA	ncRNA	3.15949
chr3	13526608	13527108	intron (NM_001330636, intron 3 of 6)	intron (NM_001330636, intron 3 of 6)	5014	NM_001136041	79885	Hs.744132	NM_024827	ENSG00000163517	HDAC11	HD11	histone deacetylase 11	protein-coding	2.36097
chr6	16278322	16278822	intron (NM_006877, intron 5 of 8)	MIRb|SINE|MIR	39761	NM_006877	2766	Hs.484741	NM_006877	ENSG00000137198	GMPR	GMPR 1|GMPR1	guanosine monophosphate reductase	protein-coding	2.76716
chr1	44309602	44310102	intron (NM_001270466, intron 4 of 4)	MER21C|LTR|ERVL	5558	NR_106727	102464830		NR_106727	ENSG00000283477	MIR6079	hsa-mir-6079	microRNA 6079	ncRNA	3.54617
chr6	135078945	135079445	Intergenic	AluJr|SINE|Alu	192065	NM_170771	64577	Hs.486520	NM_022568	ENSG00000118514	ALDH8A1	ALDH12|DJ352A20.2	aldehyde dehydrogenase 8 family member A1	protein-coding	4.98761
chr1	17839633	17840133	Intergenic	MARNA|DNA|TcMar-Mariner	-26447	NR_137287	55160	Hs.443460	NM_018125	ENSG00000074964	ARHGEF10L	GrinchGEF	Rho guanine nucleotide exchange factor 10 like	protein-coding	4.34902
chr10	72091646	72092573	intron (NR_103467, intron 1 of 2)	intron (NR_103467, intron 1 of 2)	44425	NM_001278213	55222	Hs.7778	NM_018205	ENSG00000172731	LRRC20	-	leucine rich repeat containing 20	protein-coding	2.41471
chr5	149730088	149730588	Intergenic	Intergenic	-6864	NM_001135244	6949	Hs.519672	NM_000356	ENSG00000070814	TCOF1	MFD1|TCS|TCS1|treacle	treacle ribosome biogenesis factor 1	protein-coding	2.62024
chr19	51029425	51029925	intron (NM_001080457, intron 2 of 2)	intron (NM_001080457, intron 2 of 2)	-11728	NM_001024656	554235	Hs.436338	NM_001024656	ENSG00000204653	ASPDH	-	aspartate dehydrogenase domain containing	protein-coding	4.4522
chr13	31641955	31642455	Intergenic	Intergenic	93953	NM_001286503	10808	Hs.743267	NM_006644	ENSG00000120694	HSPH1	HSP105|HSP105A|HSP105B|NY-CO-25	heat shock protein family H (Hsp110) member 1	protein-coding	3.59721
chr11	117657287	117657787	intron (NM_020693, intron 1 of 32)	intron (NM_020693, intron 1 of 32)	10439	NM_020693	57453	Hs.659513	NM_020693	ENSG00000177103	DSCAML1	DSCAM2	DS cell adhesion molecule like 1	protein-coding	3.67065
chr5	176739684	176740184	promoter-TSS (NM_001142935)	promoter-TSS (NM_001142935)	-642	NM_001142935	83463	Hs.743332	NM_031300	ENSG00000213347	MXD3	BHLHC13|MAD3|MYX	MAX dimerization protein 3	protein-coding	2.47829
chr1	95123646	95124146	intron (NR_104131, intron 4 of 4)	intron (NR_104131, intron 4 of 4)	87560	NR_039620	100616321		NR_039620	ENSG00000263526	MIR378G	-	microRNA 378g	ncRNA	3.55801
chr3	156513689	156514189	intron (NR_038387, intron 1 of 2)	Tigger6a|DNA|TcMar-Tigger	15871	NR_003284	647033	Hs.745109	NR_003284		PA2G4P4	PA2G4L1	proliferation-associated 2G4 pseudogene 4	pseudo	2.46557
chr1	56880367	56880867	Intergenic	Intergenic	164640	NM_003713	8613	Hs.405156	NM_003713	ENSG00000162407	PLPP3	Dri42|LPP3|PAP2B|PPAP2B|VCIP	phospholipid phosphatase 3	protein-coding	4.18388
chr10	122127564	122128064	Intergenic	Intergenic	-88652	NR_134516	196051	Hs.40479	NM_001030059	ENSG00000203805	PLPP4	DPPL2|PPAPDC1|PPAPDC1A	phospholipid phosphatase 4	protein-coding	inf
chr1	47271930	47272430	intron (NM_001319163, intron 1 of 9)	intron (NM_001319163, intron 1 of 9)	7510	NM_001319161	1580	Hs.436317	NM_000779	ENSG00000142973	CYP4B1	CYPIVB1|P-450HP	cytochrome P450 family 4 subfamily B member 1	protein-coding	4.48407
chr15	97579488	97579988	Intergenic	L1ME1|LINE|L1	253101	NM_001304804	145946	Hs.326528	NM_173499	ENSG00000185594	SPATA8	SRG8	spermatogenesis associated 8	protein-coding	2.79828
chr1	223926747	223927451	intron (NM_001748, intron 2 of 20)	AluSx|SINE|Alu	26980	NM_001748	824	Hs.350899	NM_001748	ENSG00000162909	CAPN2	CANP2|CANPL2|CANPml|mCANP	calpain 2	protein-coding	2.82623
chr1	7529294	7529794	intron (NM_015215, intron 6 of 22)	intron (NM_015215, intron 6 of 22)	-301785	NM_004781	9341	Hs.66708	NM_004781	ENSG00000049245	VAMP3	CEB	vesicle associated membrane protein 3	protein-coding	3.04244
chr1	36770991	36771491	promoter-TSS (NM_001162530)	promoter-TSS (NM_001162530)	-753	NM_001162530	79729	Hs.524496	NM_024676	ENSG00000214193	SH3D21	C1orf113	SH3 domain containing 21	protein-coding	5.4008
chr7	30723873	30724373	intron (NM_001202475, intron 2 of 12)	intron (NM_001202475, intron 2 of 12)	-1982	NM_001202483	1395	Hs.546246	NM_001883	ENSG00000106113	CRHR2	CRF-RB|CRF2|CRFR2|HM-CRF	corticotropin releasing hormone receptor 2	protein-coding	4.27437
chr3	127022813	127023553	Intergenic	Intergenic	86330	NR_110147	101927123	Hs.526761	NR_110147	ENSG00000244215	LINC02016	-	long intergenic non-protein coding RNA 2016	ncRNA	2.44795
chr1	56924716	56925216	Intergenic	MLT2A2|LTR|ERVL	120291	NM_003713	8613	Hs.405156	NM_003713	ENSG00000162407	PLPP3	Dri42|LPP3|PAP2B|PPAP2B|VCIP	phospholipid phosphatase 3	protein-coding	5.44222
chr5	32628119	32628619	Intergenic	Intergenic	42764	NM_006713	10923	Hs.229641	NM_006713	ENSG00000113387	SUB1	P15|PC4|p14	SUB1 homolog, transcriptional regulator	protein-coding	2.94056
chr6	30174682	30175327	intron (NM_003449, intron 1 of 9)	L2|LINE|L2	6266	NM_001242783	7726	Hs.485041	NM_003449	ENSG00000234127	TRIM26	AFP|RNF95|ZNF173	tripartite motif containing 26	protein-coding	3.59456
chr20	43972376	43973286	intron (NM_002999, intron 1 of 4)	intron (NM_002999, intron 1 of 4)	4233	NM_002999	6385	Hs.632267	NM_002999	ENSG00000124145	SDC4	SYND4	syndecan 4	protein-coding	3.31068
chr5	9335534	9336634	intron (NM_003966, intron 4 of 22)	L2c|LINE|L2	-175361	NR_109935	101929338	Hs.675861	NR_109935	ENSG00000251370	SEMA5A-AS1	CTD-2201E9.1	SEMA5A antisense RNA 1	ncRNA	3.76674
chr11	101328872	101329372	intron (NM_004621, intron 10 of 12)	intron (NM_004621, intron 10 of 12)	61514	NR_037485	100500823		NR_037485	ENSG00000263885	MIR3920	-	microRNA 3920	ncRNA	2.49519
chr11	113888492	113888992	Intergenic	LTR86C|LTR|ERVL	40520	NM_001161772	3359	Hs.413899	NM_000869	ENSG00000166736	HTR3A	5-HT-3|5-HT3A|5-HT3R|5HT3R|HTR3	5-hydroxytryptamine receptor 3A	protein-coding	2.73416
chr1	155953108	155954010	Intergenic	Intergenic	-5223	NM_001162384	9181	Hs.743352	NM_004723	ENSG00000116584	ARHGEF2	GEF|GEF-H1|GEFH1|LFP40|P40	Rho/Rac guanine nucleotide exchange factor 2	protein-coding	3.28062
chr5	131579287	131579787	Intergenic	L1PBa1|LINE|L1	-13814	NM_001131027	8572	Hs.424312	NM_003687	ENSG00000131435	PDLIM4	RIL	PDZ and LIM domain 4	protein-coding	4.10197
chr7	154742667	154743167	intron (NM_007349, intron 16 of 20)	L1MC1|LINE|L1	22690	NR_024476	100132707	Hs.586358	NR_024476	ENSG00000214106	PAXIP1-AS2	PAXIP1OS	PAXIP1 antisense RNA 2	ncRNA	5.82969
chr1	159887581	159888081	TTS (NM_001277223)	TTS (NM_001277223)	5676	NM_001277224	8407	Hs.517168	NM_003564	ENSG00000158710	TAGLN2	HA1756	transgelin 2	protein-coding	3.38563
chr15	85505757	85506257	intron (NM_001321721, intron 16 of 16)	MamGypLTR1a|LTR|Gypsy	-17737	NM_001243137	5151	Hs.9333	NM_002605	ENSG00000073417	PDE8A	HsT19550	phosphodiesterase 8A	protein-coding	5.43185
chr3	139812577	139813339	intron (NM_022131, intron 1 of 16)	intron (NM_022131, intron 1 of 16)	158931	NM_022131	64084	Hs.158529	NM_022131	ENSG00000158258	CLSTN2	ALC-GAMMA|CDHR13|CS2|CSTN2|alcagamma	calsyntenin 2	protein-coding	3.58894
chr7	101180366	101181084	intron (NM_001278563, intron 4 of 13)	intron (NM_001278563, intron 4 of 13)	31561	NR_103748	100506527	Hs.535863	NR_103747	ENSG00000233123	LINC01007	-	long intergenic non-protein coding RNA 1007	ncRNA	2.5547
chr3	49674140	49674640	intron (NM_003458, intron 2 of 11)	intron (NM_003458, intron 2 of 11)	-37045	NM_001640	327	Hs.517969	NM_001640	ENSG00000164062	APEH	AARE|ACPH|APH|D3F15S2|D3S48E|DNF15S2|OPH	acylaminoacyl-peptide hydrolase	protein-coding	4.77722
chr21	34495721	34496432	promoter-TSS (NR_109961)	promoter-TSS (NR_109961)	-71	NR_109961	101928107	Hs.382669	NR_109961	ENSG00000226527	LOC101928107	-	uncharacterized LOC101928107	ncRNA	4.09452
chr5	121595710	121596210	Intergenic	LTR18B|LTR|ERVL	-51426	NR_131762	9627	Hs.426463	NM_005460	ENSG00000064692	SNCAIP	SYPH1|Sph1	synuclein alpha interacting protein	protein-coding	2.46375
chr6	168488893	168489393	Intergenic	Intergenic	-6906	NR_110312	79981	Hs.266746	NM_024919	ENSG00000153303	FRMD1	bA164L23.1	FERM domain containing 1	protein-coding	4.39758
chr5	131803176	131803676	intron (NR_045116, intron 3 of 3)	MIRb|SINE|MIR	23039	NM_002198	3659	Hs.436061	NM_002198	ENSG00000125347	IRF1	IRF-1|MAR	interferon regulatory factor 1	protein-coding	5.31118
chr17	3538753	3539253	promoter-TSS (NM_004937)	promoter-TSS (NM_004937)	613	NM_013276	23729	Hs.579217	NM_013276	ENSG00000197417	SHPK	CARKL|SHK	sedoheptulokinase	protein-coding	3.39331
chr15	101205681	101206181	Intergenic	L2a|LINE|L2	63176	NM_198243	140460	Hs.31845	NM_024708	ENSG00000183475	ASB7	-	ankyrin repeat and SOCS box containing 7	protein-coding	3.82847
chr20	61838238	61838738	intron (NM_017798, intron 3 of 4)	intron (NM_017798, intron 3 of 4)	9050	NM_017798	54915	Hs.744852	NM_017798	ENSG00000149658	YTHDF1	C20orf21	YTH N6-methyladenosine RNA binding protein 1	protein-coding	2.88227
chr9	110653308	110653808	Intergenic	Intergenic	-401557	NM_004235	9314	Hs.376206	NM_004235	ENSG00000136826	KLF4	EZF|GKLF	Kruppel like factor 4	protein-coding	2.7934
chr15	74242758	74243258	intron (NM_005576, intron 6 of 6)	(CTAGGG)n|Simple_repeat|Simple_repeat	-22419	NR_040069	100287616	Hs.599785	NR_040066	ENSG00000261801	LOXL1-AS1	-	LOXL1 antisense RNA 1	ncRNA	5.63232
chr14	95780056	95780556	intron (NM_024734, intron 1 of 12)	intron (NM_024734, intron 1 of 12)	5939	NM_024734	79789	Hs.301478	NM_024734	ENSG00000165959	CLMN	-	calmin	protein-coding	2.60352
chr14	73012255	73012755	intron (NM_001204417, intron 17 of 17)	intron (NM_001204417, intron 17 of 17)	28977	NR_106994	102465832		NR_106994	ENSG00000273830	MIR7843	hsa-mir-7843	microRNA 7843	ncRNA	3.15608
chr9	91605804	91607033	promoter-TSS (NM_005226)	promoter-TSS (NM_005226)	95	NM_005226	1903	Hs.585118	NM_005226	ENSG00000213694	S1PR3	EDG-3|EDG3|LPB3|S1P3	sphingosine-1-phosphate receptor 3	protein-coding	2.48491
chr12	116848556	116849056	Intergenic	MER102b|DNA|hAT-Charlie	17317	NR_039683	100616309		NR_039683	ENSG00000264037	MIR4472-2	-	microRNA 4472-2	ncRNA	2.49296
chr6	137538968	137539468	intron (NM_000416, intron 1 of 6)	MIR|SINE|MIR	1349	NM_000416	3459	Hs.520414	NM_000416	ENSG00000027697	IFNGR1	CD119|IFNGR|IMD27A|IMD27B	interferon gamma receptor 1	protein-coding	2.43296
chr3	141426403	141426903	intron (NR_136190, intron 6 of 7)	intron (NR_136190, intron 6 of 7)	-30398	NM_014245	9616	Hs.134623	NM_014245	ENSG00000114125	RNF7	CKBBP1|ROC2|SAG	ring finger protein 7	protein-coding	2.7772
chr4	6751065	6751565	Intergenic	Intergenic	-33144	NM_014743	9778	Hs.79276	NM_014743	ENSG00000170871	KIAA0232	-	KIAA0232	protein-coding	3.27558
chr1	23289688	23290188	intron (NM_001289974, intron 1 of 5)	intron (NM_001289974, intron 1 of 5)	1985	NM_001289974	646262		NM_001289974	ENSG00000215906	LACTBL1	-	lactamase beta like 1	protein-coding	4.97263
chr15	67360542	67361042	intron (NM_005902, intron 1 of 8)	intron (NM_005902, intron 1 of 8)	2597	NM_005902	4088	Hs.727986	NM_005902	ENSG00000166949	SMAD3	HSPC193|HsT17436|JV15-2|LDS1C|LDS3|MADH3	SMAD family member 3	protein-coding	3.0758
chr15	75328593	75329093	intron (NM_001301103, intron 2 of 3)	intron (NM_001301103, intron 2 of 3)	-6767	NM_001301104	60490	Hs.458922	NM_021823	ENSG00000138621	PPCDC	MDS018|PPC-DC|coaC	phosphopantothenoylcysteine decarboxylase	protein-coding	2.4475
chr6	29854976	29855476	promoter-TSS (NR_001434).7	promoter-TSS (NR_001434).7	-124	NR_001434	3136	Hs.728808	NR_001434		HLA-H	HLAHP	major histocompatibility complex, class I, H (pseudogene)	pseudo	2.54324
chr15	85535395	85536135	intron (NM_002605, intron 1 of 21)	intron (NM_002605, intron 1 of 21)	10560	NM_173454	5151	Hs.9333	NM_002605	ENSG00000073417	PDE8A	HsT19550	phosphodiesterase 8A	protein-coding	3.64716
chr1	39598594	39599094	intron (NM_012090, intron 1 of 92)	intron (NM_012090, intron 1 of 92)	49005	NM_012090	23499	Hs.472475	NM_012090	ENSG00000127603	MACF1	ABP620|ACF7|MACF|OFC4	microtubule-actin crosslinking factor 1	protein-coding	2.87627
chr21	41500487	41500987	intron (NM_001389, intron 19 of 32)	MLT1E|LTR|ERVL-MaLR	83621	NR_039917	100616148		NR_039917	ENSG00000263973	MIR4760	-	microRNA 4760	ncRNA	4.01506
chr7	155339107	155339607	Intergenic	Intergenic	-12818	NM_001103176	285888	Hs.146751	NM_001103176	ENSG00000146910	CNPY1	-	canopy FGF signaling regulator 1	protein-coding	2.39006
chr7	98759869	98760369	Intergenic	Intergenic	-18376	NM_001199847	57154	Hs.189329	NM_020429	ENSG00000198742	SMURF1	-	SMAD specific E3 ubiquitin protein ligase 1	protein-coding	2.48706
chr6	74404323	74404823	non-coding (NR_110889, exon 2 of 2)	non-coding (NR_110889, exon 2 of 2)	-1235	NM_001159587	135228	Hs.399891	NM_133493	ENSG00000156535	CD109	CPAMD7|p180|r150	CD109 molecule	protein-coding	3.96963
chr14	91798025	91798888	intron (NM_001080414, intron 10 of 29)	intron (NM_001080414, intron 10 of 29)	-78233	NM_003485	8111	Hs.8882	NM_003485	ENSG00000119714	GPR68	AI2A6|GPR12A|OGR1	G protein-coupled receptor 68	protein-coding	4.95772
chr10	131241086	131241586	Intergenic	Intergenic	-24112	NM_002412	4255	Hs.501522	NM_002412	ENSG00000170430	MGMT	-	O-6-methylguanine-DNA methyltransferase	protein-coding	4.3358
chr4	30754896	30755396	intron (NM_032457, intron 1 of 2)	intron (NM_032457, intron 1 of 2)	33109	NM_001173523	5099	Hs.479439	NM_002589	ENSG00000169851	PCDH7	BH-Pcdh|BHPCDH|PPP1R120	protocadherin 7	protein-coding	2.55331
chr1	204972447	204973417	intron (NM_001005388, intron 27 of 29)	intron (NM_001005388, intron 27 of 29)	-39133	NM_001346083	6900	Hs.519220	NM_005076	ENSG00000184144	CNTN2	AXT|FAME5|TAG-1|TAX|TAX1	contactin 2	protein-coding	2.85142
chr2	9347621	9348121	intron (NM_001135191, intron 1 of 26)	CpG	977	NM_003887	8853	Hs.555902	NM_003887	ENSG00000151693	ASAP2	AMAP2|CENTB3|DDEF2|PAG3|PAP|Pap-alpha|SHAG1	ArfGAP with SH3 domain, ankyrin repeat and PH domain 2	protein-coding	2.44633
chr20	37063351	37064607	promoter-TSS (NR_027241)	promoter-TSS (NR_027241)	-17	NR_015366	388796	Hs.400876	NR_015366	ENSG00000196756	SNHG17	-	small nucleolar RNA host gene 17	ncRNA	2.5708
chr1	202015887	202016641	Intergenic	Intergenic	36574	NM_001114309	1999	Hs.603657	NM_004433	ENSG00000163435	ELF3	EPR-1|ERT|ESE-1|ESX	E74 like ETS transcription factor 3	protein-coding	3.1171
chr20	30873334	30873834	intron (NM_004798, intron 1 of 8)	intron (NM_004798, intron 1 of 8)	8130	NM_004798	9371	Hs.369670	NM_004798	ENSG00000101350	KIF3B	FLA8|HH0048|KLP-11	kinesin family member 3B	protein-coding	3.8864
chr16	74902328	74902828	Intergenic	MER21C|LTR|ERVL	-93849	NM_024306	79152	Hs.461329	NM_024306	ENSG00000103089	FA2H	FAAH|FAH1|FAXDC1|SCS7|SPG35	fatty acid 2-hydroxylase	protein-coding	4.36932
chr8	74524437	74524937	intron (NM_001164384, intron 7 of 10)	MIR|SINE|MIR	134475	NM_014393	27067	Hs.561815	NM_014393	ENSG00000040341	STAU2	39K2|39K3	staufen double-stranded RNA binding protein 2	protein-coding	4.0516
chr8	140155387	140155887	Intergenic	Intergenic	-229388	NM_152888	169044	Hs.117169	NM_152888	ENSG00000169436	COL22A1	-	collagen type XXII alpha 1 chain	protein-coding	3.06449
chr11	66374526	66375458	Intergenic	Intergenic	-9061	NM_001198846	100526737	Hs.523822	NM_001198845	ENSG00000248643	RBM14-RBM4	COAZ	RBM14-RBM4 readthrough	protein-coding	3.73736
chr3	194825915	194826415	intron (NM_152531, intron 3 of 3)	intron (NM_152531, intron 3 of 3)	10848	NR_104188	100874528	Hs.581659	NR_104188	ENSG00000233303	XXYLT1-AS1	-	XXYLT1 antisense RNA 1	ncRNA	3.79053
chr10	45180101	45180601	Intergenic	Intergenic	-226413	NM_001123376	643236	Hs.292788	NM_001123376	ENSG00000187783	TMEM72	C10orf127|KSP37	transmembrane protein 72	protein-coding	4.89831
chr1	15610840	15611340	intron (NM_052929, intron 3 of 30)	intron (NM_052929, intron 3 of 30)	37322	NM_052929	114827	Hs.659997	NM_052929	ENSG00000142621	FHAD1	-	forkhead associated phosphopeptide binding domain 1	protein-coding	3.68748
chr10	121502776	121503276	intron (NM_014937, intron 1 of 19)	L2c|LINE|L2	17467	NM_014937	22876	Hs.369755	NM_014937	ENSG00000198825	INPP5F	MSTP007|MSTPO47|SAC2|hSAC2	inositol polyphosphate-5-phosphatase F	protein-coding	4.08168
chr20	61437227	61437727	promoter-TSS (NR_102430)	promoter-TSS (NR_102430)	-538	NR_102430	101409261	Hs.593952	NR_102430	ENSG00000229873	OGFR-AS1	-	OGFR antisense RNA 1	ncRNA	3.93487
chr17	7856022	7856522	Intergenic	Intergenic	20830	NM_001330124	116840	Hs.348012	NM_053051	ENSG00000170037	CNTROB	LIP8|PP1221	centrobin, centriole duplication and spindle assembly protein	protein-coding	inf
chr1	213161266	213161766	intron (NM_001136475, intron 6 of 6)	intron (NM_001136475, intron 6 of 6)	27335	NM_001300755	90806	Hs.157078	NM_144567	ENSG00000174606	ANGEL2	Ccr4d|KIAA0759L	angel homolog 2	protein-coding	3.9514
chr1	230241591	230242091	intron (NM_004481, intron 1 of 15)	intron (NM_004481, intron 1 of 15)	38899	NM_004481	2590	Hs.743964	NM_004481	ENSG00000143641	GALNT2	GalNAc-T2	polypeptide N-acetylgalactosaminyltransferase 2	protein-coding	2.49562
chr16	18969981	18970856	Intergenic	LTR51|LTR|ERV1	-24837	NM_001324265	79905	Hs.187377	NM_024847	ENSG00000170537	TMC7	-	transmembrane channel like 7	protein-coding	2.49251
chr11	109996260	109996760	intron (NM_033390, intron 1 of 5)	intron (NM_033390, intron 1 of 5)	32423	NM_033390	85463	Hs.376289	NM_033390	ENSG00000149289	ZC3H12C	MCPIP3	zinc finger CCCH-type containing 12C	protein-coding	3.95093
chr5	43997774	43998274	Intergenic	Intergenic	390760	NM_004465	2255	Hs.248049	NM_004465	ENSG00000070193	FGF10	-	fibroblast growth factor 10	protein-coding	5.37082
chr17	53362308	53362808	intron (NM_001330375, intron 2 of 3)	intron (NM_001330375, intron 2 of 3)	18975	NM_001330375	3131	Hs.196952	NM_002126	ENSG00000108924	HLF	-	HLF, PAR bZIP transcription factor	protein-coding	4.68581
chr15	88846640	88847140	Intergenic	MLT1J2|LTR|ERVL-MaLR	-46928	NM_001012338	4916	Hs.185701	NM_002530	ENSG00000140538	NTRK3	GP145-TrkC|TRKC|gp145(trkC)	neurotrophic receptor tyrosine kinase 3	protein-coding	2.79846
chr16	81285452	81285952	intron (NM_017429, intron 2 of 10)	intron (NM_017429, intron 2 of 10)	13406	NM_017429	53630	Hs.212172	NM_017429	ENSG00000135697	BCO1	BCDO|BCDO1|BCMO|BCMO1|BCO	beta-carotene oxygenase 1	protein-coding	3.33527
chr6	138346525	138347025	Intergenic	MER76|LTR|ERVL	81885	NM_022121	64065	Hs.201446	NM_022121	ENSG00000112378	PERP	KCP1|KRTCAP1|PIGPC1|THW|dJ496H19.1	PERP, TP53 apoptosis effector	protein-coding	4.24837
chr6	139754622	139755122	Intergenic	Intergenic	40861	NR_033919	645434	Hs.666240	NR_033919	ENSG00000238099	LINC01625	-	long intergenic non-protein coding RNA 1625	ncRNA	2.60235
chr19	23281820	23282320	Intergenic	BSR/Beta|Satellite|Satellite	-17707	NM_001277403	100129543	Hs.427120	NM_001277403	ENSG00000183850	ZNF730	-	zinc finger protein 730	protein-coding	2.98251
chr22	45523649	45524149	Intergenic	ERVL-B4-int|LTR|ERVL	24566	NR_038957	100506714	Hs.189902	NR_038956		NUP50-AS1	-	NUP50 antisense RNA 1 (head to head)	ncRNA	3.43896
chr20	45971738	45972415	intron (NM_001281783, intron 2 of 21)	L1MC3|LINE|L1	-9228	NR_134501	101927377	Hs.668465	NR_134501	ENSG00000231119	LOC101927377	-	uncharacterized LOC101927377	ncRNA	4.16311
chr1	46960560	46961060	Intergenic	Intergenic	-11858	NM_147192	127343	Hs.375623	NM_147192	ENSG00000197587	DMBX1	MBX|OTX3|PAXB	diencephalon/mesencephalon homeobox 1	protein-coding	4.73162
chr8	128319792	128320292	intron (NR_117100, intron 5 of 5)	intron (NR_117100, intron 5 of 5)	63160	NR_117099	103021164	Hs.571531	NR_117099		CASC21	CARLo-2|LINC01244	cancer susceptibility candidate 21 (non-protein coding)	ncRNA	3.86165
chr3	133518995	133519495	intron (NM_021203, intron 1 of 7)	intron (NM_021203, intron 1 of 7)	16368	NM_021203	58477	Hs.12152	NM_021203	ENSG00000144867	SRPRB	APMCF1	SRP receptor beta subunit	protein-coding	3.07151
chr6	42085788	42086667	intron (NM_001164446, intron 2 of 4)	intron (NM_001164446, intron 2 of 4)	24487	NM_001164446	647024	Hs.444277	NM_001164446	ENSG00000188112	C6orf132	bA7K24.2	chromosome 6 open reading frame 132	protein-coding	3.22264
chr8	96237713	96238213	Intergenic	Intergenic	-9361	NR_046232	619344	Hs.741630	NR_046232	ENSG00000253351	LINC01298	C8orf69	long intergenic non-protein coding RNA 1298	ncRNA	4.44242
chrX	9109493	9109993	Intergenic	LTR40a|LTR|ERVL	-107575	NM_205849	171483	Hs.733351	NM_173696	ENSG00000177138	FAM9B	TEX39B	family with sequence similarity 9 member B	protein-coding	2.77681
chr9	130312539	130313039	intron (NM_001035534, intron 1 of 13)	L2b|LINE|L2	18607	NM_022833	64855	Hs.522401	NM_022833	ENSG00000136830	FAM129B	C9orf88|MEG-3|MINERVA|OC58|bA356B19.6	family with sequence similarity 129 member B	protein-coding	5.53447
chr15	57899665	57900165	intron (NR_104371, intron 2 of 16)	intron (NR_104371, intron 2 of 16)	15813	NM_001018091	145781	Hs.437256	NM_001018090	ENSG00000137878	GCOM1	GRINL1A|Gcom2|MYZAP|MYZAP-POLR2M|gcom	GRINL1A complex locus 1	protein-coding	3.34595
chr8	125667833	125668333	intron (NM_014751, intron 3 of 13)	intron (NM_014751, intron 3 of 13)	72665	NM_001282971	9788	Hs.336994	NM_014751	ENSG00000170873	MTSS1	MIM|MIMA|MIMB	MTSS1, I-BAR domain containing	protein-coding	inf
chr11	61655395	61656089	intron (NM_021727, intron 1 of 11)	intron (NM_021727, intron 1 of 11)	3275	NM_021727	3995	Hs.21765	NM_021727	ENSG00000221968	FADS3	CYB5RP|LLCDL3	fatty acid desaturase 3	protein-coding	4.05246
chr17	73085004	73085504	5' UTR (NM_001271765, exon 2 of 7)	5' UTR (NM_001271765, exon 2 of 7)	1218	NM_004695	9121	Hs.592095	NM_004695	ENSG00000170190	SLC16A5	MCT5|MCT6	solute carrier family 16 member 5	protein-coding	2.71241
chr16	56947117	56947617	3' UTR (NM_000339, exon 26 of 26)	3' UTR (NM_000339, exon 26 of 26)	9191	NR_106923	102466752		NR_106923	ENSG00000283471	MIR6863	hsa-mir-6863	microRNA 6863	ncRNA	2.92908
chr14	74905119	74905619	Intergenic	Charlie20a|DNA|hAT-Charlie	-12564	NM_001105579	646658	Hs.12400	NM_001105579	ENSG00000183379	SYNDIG1L	CAPUCIN|DSPC1|IFITMD4|TMEM90A	synapse differentiation inducing 1 like	protein-coding	3.30943
chr6	119644594	119645094	intron (NM_005907, intron 2 of 12)	intron (NM_005907, intron 2 of 12)	26087	NM_005907	4121	Hs.102788	NM_005907	ENSG00000111885	MAN1A1	HUMM3|HUMM9|MAN9	mannosidase alpha class 1A member 1	protein-coding	inf
chr8	144372763	144373263	promoter-TSS (NM_030895)	promoter-TSS (NM_030895)	-546	NM_030895	79943	Hs.512740	NM_030895	ENSG00000185730	ZNF696	-	zinc finger protein 696	protein-coding	2.36634
chr1	26106908	26107408	intron (NM_020379, intron 9 of 11)	intron (NM_020379, intron 9 of 11)	-19509	NM_020451	57190	Hs.323396	NM_020451	ENSG00000162430	SELENON	CFTD|MDRS1|RSMD1|RSS|SELN|SEPN1	selenoprotein N	protein-coding	3.40215
chr11	57180972	57181472	intron (NM_001278206, intron 11 of 13)	L2b|LINE|L2	13338	NM_014096	29015	Hs.99962	NM_014096	ENSG00000134802	SLC43A3	EEG1|FOAP-13|PRO1659|SEEEG-1	solute carrier family 43 member 3	protein-coding	4.12433
chr17	74563758	74564258	intron (NM_006456, intron 7 of 8)	intron (NM_006456, intron 7 of 8)	6293	NR_004395	677848		NR_004395	ENSG00000278261	SNORD1A	R38A|snR38A	small nucleolar RNA, C/D box 1A	snoRNA	4.77614
chr16	75104040	75104540	intron (NM_032268, intron 1 of 4)	L2b|LINE|L2	46380	NM_153486	197257	Hs.380929	NM_153486	ENSG00000166816	LDHD	DLD	lactate dehydrogenase D	protein-coding	3.91089
chr1	36668965	36669874	Intergenic	Intergenic	-20593	NM_001321471	9967	Hs.744057	NM_005119	ENSG00000054118	THRAP3	TRAP150	thyroid hormone receptor associated protein 3	protein-coding	3.53361
chr1	173362303	173362803	intron (NR_037845, intron 2 of 2)	intron (NR_037845, intron 2 of 2)	67948	NR_125960	101928673	Hs.674889	NR_125960	ENSG00000203739	LOC101928673	-	uncharacterized LOC101928673	ncRNA	3.55582
chr1	33195554	33196054	Intergenic	Intergenic	-11708	NM_020888	57648	Hs.591502	NM_020888	ENSG00000162522	KIAA1522	-	KIAA1522	protein-coding	3.85454
chr5	141625783	141626283	Intergenic	Intergenic	71854	NR_131221	100642175	Hs.684549	NR_131221	ENSG00000281881	SPRY4-IT1	SPRIGHTLY	SPRY4 intronic transcript 1	ncRNA	3.08862
chr22	36660035	36660535	intron (NM_001136540, intron 5 of 5)	MER77B|LTR|ERVL	11168	NM_003661	8542	Hs.114309	NM_003661	ENSG00000100342	APOL1	APO-L|APOL|APOL-I|FSGS4	apolipoprotein L1	protein-coding	4.95699
chr15	69420915	69421415	intron (NR_031680, intron 3 of 4)	intron (NR_031680, intron 3 of 4)	-31771	NM_015554	26035	Hs.183006	NM_015554	ENSG00000138604	GLCE	HSEPI	glucuronic acid epimerase	protein-coding	4.86081
chr9	101624339	101624839	Intergenic	Intergenic	54608	NM_024642	79695	Hs.47099	NM_024642	ENSG00000119514	GALNT12	CRCS1|GalNAc-T12	polypeptide N-acetylgalactosaminyltransferase 12	protein-coding	2.54817
chr8	125240977	125241477	intron (NR_125420, intron 1 of 2)	L2a|LINE|L2	18412	NR_125420	101927588	Hs.617072	NR_125420	ENSG00000214803	LOC101927588	-	uncharacterized LOC101927588	ncRNA	3.12334
chrX	114636891	114637391	Intergenic	MLT1J|LTR|ERVL-MaLR	112858	NM_016383	51213	Hs.242183	NM_016383	ENSG00000102021	LUZP4	CT-28|CT-8|CT28|HOM-TES-85	leucine zipper protein 4	protein-coding	inf
chr5	177609432	177609932	Intergenic	MER83C|LTR|ERV1	4751	NR_003281	64396	Hs.591738	NM_022471		GMCL1P1	GCL|GMCL1L|GMCL2	germ cell-less, spermatogenesis associated 1 pseudogene 1	pseudo	4.37932
chr16	80299435	80300141	intron (NR_120307, intron 2 of 5)	intron (NR_120307, intron 2 of 5)	-274843	NM_001305017	83657	Hs.98849	NM_130897	ENSG00000168589	DYNLRB2	DNCL2B|DNLC2B|ROBLD2	dynein light chain roadblock-type 2	protein-coding	inf
chr11	70963632	70964552	Intergenic	CpG	-28250	NM_012309	22941	Hs.268726	NM_012309	ENSG00000162105	SHANK2	AUTS17|CORTBP1|CTTNBP1|ProSAP1|SHANK|SPANK-3	SH3 and multiple ankyrin repeat domains 2	protein-coding	3.57907
chr14	35006493	35006993	intron (NM_001318916, intron 1 of 4)	LTR40c|LTR|ERVL	2200	NM_001318916	55837	Hs.433269	NM_018453	ENSG00000129518	EAPP	BM036|C14orf11	E2F associated phosphoprotein	protein-coding	2.73722
chr5	89940730	89941230	intron (NR_003149, intron 15 of 89)	intron (NR_003149, intron 15 of 89)	86363	NR_003149	84059	Hs.591777	NM_032119	ENSG00000164199	ADGRV1	FEB4|GPR98|MASS1|USH2B|USH2C|VLGR1|VLGR1b	adhesion G protein-coupled receptor V1	protein-coding	3.98019
chr17	2621713	2622213	Intergenic	FLAM_A|SINE|Alu	6360	NR_136412	105371592	Hs.731739	NR_136412	ENSG00000262050	LOC105371592	-	uncharacterized LOC105371592	ncRNA	3.54887
chr5	141120359	141121264	Intergenic	Intergenic	-59012	NM_022481	64411	Hs.726187	NM_022481	ENSG00000120318	ARAP3	CENTD3|DRAG1	ArfGAP with RhoGAP domain, ankyrin repeat and PH domain 3	protein-coding	5.55
chr5	149554654	149555154	intron (NM_001804, intron 1 of 2)	intron (NM_001804, intron 1 of 2)	8560	NM_001804	1044	Hs.1545	NM_001804	ENSG00000113722	CDX1	-	caudal type homeobox 1	protein-coding	4.61153
chr11	121102197	121102697	Intergenic	MLT1M|LTR|ERVL-MaLR	-60941	NM_006918	6309	Hs.287749	NM_006918	ENSG00000109929	SC5D	ERG3|S5DES|SC5DL	sterol-C5-desaturase	protein-coding	inf
chr6	84533967	84534467	Intergenic	Intergenic	-28768	NM_001009994	134701	Hs.149454	NM_001009994	ENSG00000203877	RIPPLY2	C6orf159|SCDO6|dJ237I15.1	ripply transcriptional repressor 2	protein-coding	3.98436
chr5	167838058	167838558	intron (NM_015238, intron 8 of 22)	intron (NM_015238, intron 8 of 22)	-75155	NM_002887	5917	Hs.654907	NM_002887	ENSG00000113643	RARS	ArgRS|DALRD1|HLD9	arginyl-tRNA synthetase	protein-coding	2.56005
chr1	242733067	242733567	Intergenic	MIR|SINE|MIR	-45319	NM_001320272	200150	Hs.672452	NM_152666	ENSG00000180287	PLD5	PLDC	phospholipase D family member 5	protein-coding	3.91323
chr20	34650666	34651166	Intergenic	MIRb|SINE|MIR	-12034	NR_027451	647979	Hs.743232	NR_027451	ENSG00000260032	NORAD	LINC00657	non-coding RNA activated by DNA damage	ncRNA	2.48485
chr10	79482749	79483249	Intergenic	LTR14B|LTR|ERVK	-85422	NM_001271522	3778	Hs.144795	NM_002247	ENSG00000156113	KCNMA1	BKTM|KCa1.1|MaxiK|SAKCA|SLO|SLO-ALPHA|SLO1|bA205K10.1|hSlo|mSLO1	potassium calcium-activated channel subfamily M alpha 1	protein-coding	4.33857
chr3	119513789	119514289	intron (NM_022002, intron 1 of 8)	intron (NM_022002, intron 1 of 8)	12482	NM_022002	8856	Hs.7303	NM_003889	ENSG00000144852	NR1I2	BXR|ONR1|PAR|PAR1|PAR2|PARq|PRR|PXR|SAR|SXR	nuclear receptor subfamily 1 group I member 2	protein-coding	2.49335
chr13	40764691	40765344	Intergenic	Intergenic	9072	NR_046870	100874127	Hs.578028	NR_046870	ENSG00000230710	LINC00332	NCRNA00332	long intergenic non-protein coding RNA 332	ncRNA	3.66035
chr20	41215959	41216459	intron (NM_007050, intron 7 of 30)	intron (NM_007050, intron 7 of 30)	-97914	NR_110004	101927159	Hs.570383	NR_110004	ENSG00000229042	LOC101927159	-	uncharacterized LOC101927159	ncRNA	5.11435
chr15	67408040	67408540	intron (NM_005902, intron 1 of 8)	intron (NM_005902, intron 1 of 8)	-9764	NM_001145102	4088	Hs.727986	NM_005902	ENSG00000166949	SMAD3	HSPC193|HsT17436|JV15-2|LDS1C|LDS3|MADH3	SMAD family member 3	protein-coding	4.97925
chr11	67914501	67915001	Intergenic	Intergenic	-25893	NM_001277	1119	Hs.77221	NM_001277	ENSG00000110721	CHKA	CHK|CK|CKI|EK	choline kinase alpha	protein-coding	2.7851
chr5	60618738	60619467	Intergenic	L2a|LINE|L2	-8997	NM_020928	57688	Hs.744939	NM_020928	ENSG00000130449	ZSWIM6	AFND	zinc finger SWIM-type containing 6	protein-coding	3.15605
chr1	223926747	223927451	intron (NM_001748, intron 2 of 20)	AluSx|SINE|Alu	26980	NM_001748	824	Hs.350899	NM_001748	ENSG00000162909	CAPN2	CANP2|CANPL2|CANPml|mCANP	calpain 2	protein-coding	4.57229
chr2	42319386	42319886	Intergenic	LTR40a|LTR|ERVL	44475	NM_138370	91461	Hs.408542	NM_138370	ENSG00000162878	PKDCC	SGK493|Vlk	protein kinase domain containing, cytoplasmic	protein-coding	5.43235
chr6	108105928	108106428	intron (NM_198081, intron 1 of 7)	MIR3|SINE|MIR	39343	NM_001286408	256380	Hs.486109	NM_198081	ENSG00000146285	SCML4	dJ47M23.1	sex comb on midleg-like 4 (Drosophila)	protein-coding	2.67833
chr1	55269776	55270618	Intergenic	MIRb|SINE|MIR	-1539	NM_001110533	163747	Hs.376018	NM_152607	ENSG00000162398	LEXM	C1orf177|LEM	lymphocyte expansion molecule	protein-coding	3.44843
chr5	131572859	131573359	Intergenic	Intergenic	-9553	NM_001142599	8974	Hs.519568	NM_004199	ENSG00000072682	P4HA2	MYP25	prolyl 4-hydroxylase subunit alpha 2	protein-coding	3.64804
chr3	193876862	193877362	Intergenic	Intergenic	23181	NM_005524	3280	Hs.250666	NM_005524	ENSG00000114315	HES1	HES-1|HHL|HRY|bHLHb39	hes family bHLH transcription factor 1	protein-coding	4.31314
chr2	238548439	238548939	intron (NM_001137550, intron 1 of 23)	intron (NM_001137550, intron 1 of 23)	12465	NM_001137550	9208	Hs.471779	NM_004735	ENSG00000124831	LRRFIP1	FLAP-1|FLAP1|FLIIAP1|GCF-2|GCF2|HUFI-1|TRIP	LRR binding FLII interacting protein 1	protein-coding	3.81284
chr6	1670802	1671302	intron (NM_001500, intron 9 of 10)	intron (NM_001500, intron 9 of 10)	60371	NM_001453	2296	Hs.348883	NM_001453	ENSG00000054598	FOXC1	ARA|FKHL7|FREAC-3|FREAC3|IGDA|IHG1|IRID1|RIEG3	forkhead box C1	protein-coding	2.85572
chr5	16539225	16539725	intron (NM_001034850, intron 3 of 8)	intron (NM_001034850, intron 3 of 8)	-30368	NM_019000	54463	Hs.481704	NM_019000	ENSG00000154153	FAM134B	JK-1|JK1	family with sequence similarity 134 member B	protein-coding	2.84269
chr8	141965945	141966445	intron (NM_153831, intron 1 of 31)	HAL1|LINE|L1	45217	NM_005607	5747	Hs.395482	NM_005607	ENSG00000169398	PTK2	FADK|FAK|FAK1|FRNK|PPP1R71|p125FAK|pp125FAK	protein tyrosine kinase 2	protein-coding	5.30026
chr1	235012121	235012621	Intergenic	Intergenic	87375	NR_125945	101927851	Hs.520684	NR_125945	ENSG00000238005	LOC101927851	-	uncharacterized LOC101927851	ncRNA	2.45219
chr3	24270886	24271386	intron (NM_000461, intron 2 of 9)	intron (NM_000461, intron 2 of 9)	78321	NR_121667	101927854	Hs.570625	NR_121667		LOC101927854	-	uncharacterized LOC101927854	ncRNA	3.43671
chr7	73867194	73867694	promoter-TSS (NM_016328)	promoter-TSS (NM_016328)	-676	NM_005685	9569	Hs.647056	NM_005685	ENSG00000006704	GTF2IRD1	BEN|CREAM1|GTF3|MUSTRD1|RBAP2|WBS|WBSCR11|WBSCR12|hMusTRD1alpha1	GTF2I repeat domain containing 1	protein-coding	2.49585
chr6	39303520	39304326	3' UTR (NM_001289024, exon 10 of 10)	3' UTR (NM_001289024, exon 10 of 10)	-13593	NM_001135106	83795	Hs.287765	NM_032115	ENSG00000095981	KCNK16	K2p16.1|TALK-1|TALK1	potassium two pore domain channel subfamily K member 16	protein-coding	2.58314
chr6	24981636	24982136	intron (NM_001286446, intron 1 of 13)	MIR|SINE|MIR	-45592	NM_001286445	9750	Hs.559459	NM_014722	ENSG00000111913	FAM65B	C6orf32|DFNB104|DIFF40|DIFF48|MYONAP|PL48	family with sequence similarity 65 member B	protein-coding	3.79658
chr8	144362895	144364105	intron (NR_120683, intron 1 of 1)	LTR50|LTR|ERVL	370	NR_120682	100507316	Hs.446671	NR_120682	ENSG00000253716	MINCR	LINC01604	MYC-induced long noncoding RNA	ncRNA	4.24339
chr6	105159162	105159662	Intergenic	Intergenic	148009	NM_001321084	57531	Hs.434340	NM_020771	ENSG00000085382	HACE1	SPPRS	HECT domain and ankyrin repeat containing E3 ubiquitin protein ligase 1	protein-coding	2.35025
chr13	97657967	97658467	Intergenic	Intergenic	-11233	NM_001346195	27199	Hs.352218	NM_080818	ENSG00000165621	OXGR1	GPR80|GPR99|P2RY15|P2Y15|aKGR	oxoglutarate receptor 1	protein-coding	3.11595
chr9	124664992	124665492	intron (NM_001139442, intron 6 of 8)	intron (NM_001139442, intron 6 of 8)	160178	NM_138709	153090	Hs.522378	NM_032552	ENSG00000136848	DAB2IP	AF9Q34|AIP-1|AIP1|DIP1/2	DAB2 interacting protein	protein-coding	2.55292
chr9	86958057	86958557	intron (NM_022127, intron 1 of 18)	LTR23|LTR|ERV1	-2613	NR_037638	64078	Hs.535966	NM_022127	ENSG00000197506	SLC28A3	CNT3	solute carrier family 28 member 3	protein-coding	2.47759
chr10	90875836	90876336	Intergenic	Intergenic	-52918	NR_039827	100616192		NR_039827	ENSG00000265375	MIR4679-2	-	microRNA 4679-2	ncRNA	3.19867
chr3	13891644	13892144	intron (NM_004625, intron 3 of 3)	intron (NM_004625, intron 3 of 3)	29724	NM_004625	7476	Hs.72290	NM_004625	ENSG00000154764	WNT7A	-	Wnt family member 7A	protein-coding	2.56605
chr21	18895270	18895770	intron (NM_001207063, intron 1 of 4)	L2a|LINE|L2	10296	NM_001207063	1525	Hs.627078	NM_001338	ENSG00000154639	CXADR	CAR|CAR4/6|HCAR	coxsackie virus and adenovirus receptor	protein-coding	4.49599
chr12	13348792	13349936	promoter-TSS (NM_001423)	promoter-TSS (NM_001423)	-238	NM_001423	2012	Hs.719042	NM_001423	ENSG00000134531	EMP1	CL-20|EMP-1|TMP	epithelial membrane protein 1	protein-coding	2.50205
chrX	135252266	135252977	intron (NM_001159700, intron 2 of 6)	intron (NM_001159700, intron 2 of 6)	826	NM_001167819	2273	Hs.435369	NM_001449	ENSG00000022267	FHL1	FHL-1|FHL1A|FHL1B|FLH1A|KYOT|RBMX1A|RBMX1B|SLIM|SLIM-1|SLIM1|SLIMMER|XMPMA	four and a half LIM domains 1	protein-coding	2.64622
chr5	149571492	149571992	intron (NM_014228, intron 1 of 13)	MIR3|SINE|MIR	2318	NM_014228	6534	Hs.241597	NM_014228	ENSG00000011083	SLC6A7	PROT	solute carrier family 6 member 7	protein-coding	4.73789
chr10	134923631	134924131	intron (NM_001083909, intron 5 of 6)	intron (NM_001083909, intron 5 of 6)	8131	NM_001291085	84435	Hs.435183	NM_032422	ENSG00000197177	ADGRA1	GPR123	adhesion G protein-coupled receptor A1	protein-coding	4.3962
chr8	110605689	110606189	intron (NM_001099748, intron 4 of 7)	intron (NM_001099748, intron 4 of 7)	14352	NM_001330596	55638	Hs.390738	NM_017786	ENSG00000147642	SYBU	GOLSYN|OCSYN|SNPHL	syntabulin	protein-coding	5.50821
chr19	4391664	4392316	intron (NM_003025, intron 1 of 9)	intron (NM_003025, intron 1 of 9)	8425	NM_001199944	6455	Hs.97616	NM_003025	ENSG00000141985	SH3GL1	CNSA1|EEN|SH3D2B|SH3P8	SH3 domain containing GRB2 like 1, endophilin A2	protein-coding	3.46589
chr1	244554980	244555480	Intergenic	ERVL-int|LTR|ERVL	39293	NM_001276348	200159	Hs.442703	NM_001012970	ENSG00000173728	C1orf100	-	chromosome 1 open reading frame 100	protein-coding	2.96901
chr17	21210304	21211020	intron (NM_145109, intron 9 of 11)	MER21C|LTR|ERVL	19314	NM_002756	5606	Hs.514012	NM_002756	ENSG00000034152	MAP2K3	MAPKK3|MEK3|MKK3|PRKMK3|SAPKK-2|SAPKK2	mitogen-activated protein kinase kinase 3	protein-coding	3.23315
chr6	42642021	42642521	intron (NM_015255, intron 38 of 46)	AluSz|SINE|Alu	48087	NM_000322	5961	Hs.654489	NM_000322	ENSG00000112619	PRPH2	AOFMD|AVMD|CACD2|DS|MDBS1|PRPH|RDS|RP7|TSPAN22|rd2	peripherin 2	protein-coding	2.5851
chr1	16152149	16152649	Intergenic	Intergenic	-18205	NM_001089591	440567	Hs.568229	NM_001089591	ENSG00000233954	UQCRHL	-	ubiquinol-cytochrome c reductase hinge protein like	protein-coding	3.10684
chr2	241190427	241191324	Intergenic	Intergenic	-110803	NM_148961	150677	Hs.148586	NM_148961	ENSG00000178602	OTOS	OTOSP	otospiralin	protein-coding	2.59456
chr11	65892081	65892581	intron (NM_018026, intron 1 of 23)	MLT1L|LTR|ERVL-MaLR	54507	NM_018026	55690	Hs.644326	NM_018026	ENSG00000175115	PACS1	MRD17|SHMS	phosphofurin acidic cluster sorting protein 1	protein-coding	3.13236
chr11	75493750	75494250	intron (NM_001253891, intron 1 of 6)	MIR3|SINE|MIR	14222	NM_032564	84649	Hs.129798	NM_032564	ENSG00000062282	DGAT2	ARAT|GS1999FULL|HMFN1045	diacylglycerol O-acyltransferase 2	protein-coding	3.41233
chr22	22751481	22752384	Intergenic	Intergenic	99470	NR_027293	96610	Hs.449601	NM_080926	ENSG00000236850	BMS1P20	IGL|IGLV|IGLV1	BMS1, ribosome biogenesis factor pseudogene 20	pseudo	3.95594
chr14	103594852	103595667	intron (NM_006291, intron 2 of 10)	intron (NM_006291, intron 2 of 10)	2596	NM_006291	7127	Hs.525607	NM_006291	ENSG00000185215	TNFAIP2	B94|EXOC3L3	TNF alpha induced protein 2	protein-coding	2.5367
chr20	48476311	48476811	intron (NR_048539, intron 7 of 13)	MIR3|SINE|MIR	47311	NM_001260491	23315	Hs.444202	NM_015266	ENSG00000197818	SLC9A8	NHE-8|NHE8	solute carrier family 9 member A8	protein-coding	2.90487
chr5	2149193	2150136	Intergenic	Intergenic	162650	NR_104616	100506858	Hs.445071	NR_104616		LOC100506858	-	uncharacterized LOC100506858	ncRNA	3.58347
chr1	4750900	4751400	intron (NM_001042478, intron 1 of 5)	intron (NM_001042478, intron 1 of 5)	36045	NM_018836	55966	Hs.12473	NM_018836	ENSG00000196581	AJAP1	MOT8|SHREW-1|SHREW1	adherens junctions associated protein 1	protein-coding	3.29355
chr6	15133056	15133556	Intergenic	Intergenic	-112900	NM_004973	3720	Hs.269059	NM_004973	ENSG00000008083	JARID2	JMJ	jumonji and AT-rich interaction domain containing 2	protein-coding	2.94151
chr12	50056754	50057615	intron (NM_175736, intron 4 of 25)	intron (NM_175736, intron 4 of 25)	39782	NM_012272	25766	Hs.706827	NM_012272	ENSG00000110844	PRPF40B	HYPC	pre-mRNA processing factor 40 homolog B	protein-coding	4.54425
chr16	56297527	56298027	intron (NM_020988, intron 2 of 8)	MIR3|SINE|MIR	18345	NR_037499	100500891		NR_037499	ENSG00000265281	MIR3935	-	microRNA 3935	ncRNA	5.24086
chr6	34982486	34982986	intron (NM_015245, intron 10 of 23)	intron (NM_015245, intron 10 of 23)	125698	NM_015245	23294	Hs.656492	NM_015245	ENSG00000064999	ANKS1A	ANKS1	ankyrin repeat and sterile alpha motif domain containing 1A	protein-coding	2.71132
chr5	32710019	32710999	promoter-TSS (NM_001204376)	promoter-TSS (NM_001204376)	-234	NM_001204376	4883	Hs.13528	NM_000908	ENSG00000113389	NPR3	ANP-C|ANPR-C|ANPRC|C5orf23|GUCY2B|NPR-C|NPRC	natriuretic peptide receptor 3	protein-coding	3.6865
chr14	104092666	104093166	Intergenic	Intergenic	-2609	NM_001130107	3831	Hs.20107	NM_005552	ENSG00000126214	KLC1	KLC|KNS2|KNS2A	kinesin light chain 1	protein-coding	4.27413
chr17	40729191	40730017	non-coding (NR_045671, exon 1 of 7)	non-coding (NR_045671, exon 1 of 7)	130	NM_001256014	29893	Hs.383019	NM_013290	ENSG00000131470	PSMC3IP	GT198|HOP2|HUMGT198A|ODG3|TBPIP	PSMC3 interacting protein	protein-coding	2.40473
chr9	103202290	103202790	intron (NM_001198806, intron 1 of 2)	intron (NM_001198806, intron 1 of 2)	-1648	NM_001198812	100526694	Hs.598100	NM_001198812		MSANTD3-TMEFF1	C9orf3-TMEFF1|C9orf30-TMEFF1	MSANTD3-TMEFF1 readthrough	protein-coding	4.69238
chr1	13850590	13851090	Intergenic	Intergenic	-10598	NM_001010847	126755	Hs.657356	NM_001010847	ENSG00000162494	LRRC38	-	leucine rich repeat containing 38	protein-coding	2.60706
chr22	38292026	38292526	Intergenic	Intergenic	-9879	NM_033386	85377	Hs.517610	NM_033386	ENSG00000100139	MICALL1	MICAL-L1|MIRAB13	MICAL like 1	protein-coding	2.87198
chr6	1797880	1798380	intron (NM_001500, intron 7 of 10)	intron (NM_001500, intron 7 of 10)	187449	NM_001453	2296	Hs.348883	NM_001453	ENSG00000054598	FOXC1	ARA|FKHL7|FREAC-3|FREAC3|IGDA|IHG1|IRID1|RIEG3	forkhead box C1	protein-coding	3.47453
chr17	2310134	2310911	non-coding (NR_028335, exon 3 of 3)	non-coding (NR_028335, exon 3 of 3)	-6265	NM_020310	4335	Hs.626579	NM_020310	ENSG00000070444	MNT	MAD6|MXD6|ROX|bHLHd3	MAX network transcriptional repressor	protein-coding	3.12926
chr1	228996090	228996590	Intergenic	Intergenic	125516	NM_021205	58480	Hs.647774	NM_021205	ENSG00000116574	RHOU	ARHU|CDC42L1|G28K|WRCH1|hG28K	ras homolog family member U	protein-coding	3.65257
chr3	42870577	42871077	intron (NM_001296, intron 2 of 2)	intron (NM_001296, intron 2 of 2)	19863	NM_001296	1238	Hs.146346	NM_001296	ENSG00000144648	ACKR2	CCBP2|CCR10|CCR9|CMKBR9|D6|hD6	atypical chemokine receptor 2	protein-coding	5.27529
chr19	18630777	18631771	intron (NM_006532, intron 1 of 11)	intron (NM_006532, intron 1 of 11)	1663	NM_006532	8178	Hs.515260	NM_006532	ENSG00000105656	ELL	C19orf17|ELL1|MEN|PPP1R68	elongation factor for RNA polymerase II	protein-coding	2.46699
chr1	15225372	15226061	intron (NM_201628, intron 1 of 14)	intron (NM_201628, intron 1 of 14)	-24908	NM_001018000	23254	Hs.368823	NM_015209	ENSG00000189337	KAZN	KAZ	kazrin, periplakin interacting protein	protein-coding	3.82728
chr7	103187779	103188279	intron (NM_173054, intron 41 of 63)	AluSx1|SINE|Alu	-101405	NM_206885	375611	Hs.585146	NM_198999	ENSG00000170615	SLC26A5	DFNB61|PRES	solute carrier family 26 member 5	protein-coding	3.88942
chr15	90807861	90809403	promoter-TSS (NR_028052)	promoter-TSS (NR_028052)	-263	NM_001033088	51335	Hs.135471	NM_016645	ENSG00000182768	NGRN	DSC92	neugrin, neurite outgrowth associated	protein-coding	2.77086
chr7	45861669	45862169	Intergenic	AluSz|SINE|Alu	-53302	NR_024271	641977	Hs.723477	NR_024271	ENSG00000214765	SEPT7P2	SEPT13|SEPT7B	septin 7 pseudogene 2	pseudo	inf
chr7	77039389	77039889	intron (NM_017439, intron 1 of 30)	intron (NM_017439, intron 1 of 30)	-4876	NR_110073	101927243	Hs.547753	NR_110073		LOC101927243	-	uncharacterized LOC101927243	ncRNA	2.51413
chr6	43806056	43806795	Intergenic	Intergenic	-52339	NR_024478	100132354	Hs.376232	NR_024478		LINC01512	HI-LNC77	long intergenic non-protein coding RNA 1512	ncRNA	2.46079
chr7	151442119	151442791	intron (NM_016203, intron 3 of 15)	intron (NM_016203, intron 3 of 15)	-9055	NM_001304527	51422	Hs.647072	NM_016203	ENSG00000106617	PRKAG2	AAKG|AAKG2|CMH6|H91620p|WPWS	protein kinase AMP-activated non-catalytic subunit gamma 2	protein-coding	2.65633
chr4	84474000	84474500	intron (NM_032717, intron 2 of 11)	MLT1A0|LTR|ERVL-MaLR	16780	NM_032717	84803	Hs.99196	NM_032717	ENSG00000138678	GPAT3	AGPAT 10|AGPAT10|AGPAT8|AGPAT9|HMFN0839|LPAAT-theta|MAG1	glycerol-3-phosphate acyltransferase 3	protein-coding	2.66561
chr15	59847849	59848349	Intergenic	AluSz6|SINE|Alu	-55883	NM_004751	9245	Hs.194710	NM_004751	ENSG00000140297	GCNT3	C2/4GnT|C24GNT|C2GNT2|C2GNTM|GNTM	glucosaminyl (N-acetyl) transferase 3, mucin type	protein-coding	2.74231
chr9	133286569	133287069	intron (NM_001291815, intron 74 of 86)	AluSx|SINE|Alu	-33275	NM_054012	445	Hs.160786	NM_000050	ENSG00000130707	ASS1	ASS|CTLN1	argininosuccinate synthase 1	protein-coding	3.59558
chr19	13914279	13914779	intron (NM_023072, intron 2 of 12)	AluSz|SINE|Alu	8255	NM_023072	65249	Hs.466015	NM_023072	ENSG00000132003	ZSWIM4	-	zinc finger SWIM-type containing 4	protein-coding	4.31691
chr3	27401991	27402491	intron (NM_152534, intron 2 of 38)	intron (NM_152534, intron 2 of 38)	8710	NM_199347	152110	Hs.506115	NM_152534	ENSG00000163491	NEK10	-	NIMA related kinase 10	protein-coding	3.24544
chr20	55631661	55632161	Intergenic	Intergenic	-156841	NR_110631	102723590	Hs.667674	NR_110631		BMP7-AS1	-	BMP7 antisense RNA 1	ncRNA	3.66877
chrX	128881955	128882649	intron (NM_003399, intron 7 of 20)	intron (NM_003399, intron 7 of 20)	9356	NM_003399	7512	Hs.170499	NM_003399	ENSG00000122121	XPNPEP2	AEACEI|APP2	X-prolyl aminopeptidase 2	protein-coding	3.18456
chr1	203591798	203592298	Intergenic	Intergenic	-3867	NM_001001396	493	Hs.343522	NM_001684	ENSG00000058668	ATP2B4	ATP2B2|MXRA1|PMCA4|PMCA4b|PMCA4x	ATPase plasma membrane Ca2+ transporting 4	protein-coding	4.78876
chr4	74542487	74543119	Intergenic	Intergenic	-56455	NM_001270392	166824	Hs.529677	NM_177532	ENSG00000169435	RASSF6	-	Ras association domain family member 6	protein-coding	3.1474
chr17	43037942	43038442	intron (NM_006688, intron 1 of 1)	intron (NM_006688, intron 1 of 1)	7452	NM_006688	10882	Hs.134012	NM_006688	ENSG00000131094	C1QL1	C1QRF|C1QTNF14|CRF	complement C1q like 1	protein-coding	3.20712
chr5	156938577	156939404	intron (NM_033274, intron 8 of 22)	intron (NM_033274, intron 8 of 22)	-51883	NR_136204	102724404	Hs.570889	NR_136204	ENSG00000251405	LOC102724404	-	uncharacterized LOC102724404	ncRNA	3.7387
chr6	139383959	139384459	Intergenic	MIRb|SINE|MIR	34390	NM_021243	58527	Hs.600861	NM_021243	ENSG00000146386	ABRACL	C6orf115|Costars|HSPC280|PRO2013	ABRA C-terminal like	protein-coding	3.59952
chr1	54964509	54965009	Intergenic	Intergenic	-49048	NM_015547	26027	Hs.745173	NM_015547	ENSG00000162390	ACOT11	BFIT|STARD14|THEA|THEM1	acyl-CoA thioesterase 11	protein-coding	3.13211
chr10	70981973	70982829	intron (NM_025130, intron 1 of 17)	intron (NM_025130, intron 1 of 17)	2342	NM_025130	80201	Hs.522988	NM_025130	ENSG00000156510	HKDC1	-	hexokinase domain containing 1	protein-coding	2.65834
chr11	15179850	15180350	intron (NM_001278316, intron 1 of 10)	L2b|LINE|L2	9452	NM_001278313	387755	Hs.591997	NM_001031853	ENSG00000188487	INSC	-	inscuteable homolog (Drosophila)	protein-coding	4.63761
chr20	19782976	19783706	Intergenic	Intergenic	-83824	NM_001242581	54453	Hs.472270	NM_018993	ENSG00000132669	RIN2	MACS|RASSF4	Ras and Rab interactor 2	protein-coding	2.92737
chr11	94527432	94528345	intron (NM_001301007, intron 1 of 11)	intron (NM_001301007, intron 1 of 11)	26381	NM_130847	154810	Hs.503594	NM_130847	ENSG00000166025	AMOTL1	JEAP	angiomotin like 1	protein-coding	2.3811
chr8	139805262	139805957	intron (NM_152888, intron 12 of 64)	intron (NM_152888, intron 12 of 64)	120639	NM_152888	169044	Hs.117169	NM_152888	ENSG00000169436	COL22A1	-	collagen type XXII alpha 1 chain	protein-coding	2.84084
chr6	42697394	42697894	Intergenic	MLT1B|LTR|ERVL-MaLR	2330	NR_037141	442211	Hs.563394	NR_037141		ATP6V0CP3	-	ATPase H+ transporting V0 subunit c pseudogene 3	pseudo	2.7431
chr7	47641407	47641907	Intergenic	Intergenic	-19880	NR_108090	101929086	Hs.563487	NR_108090	ENSG00000236078	LINC01447	-	long intergenic non-protein coding RNA 1447	ncRNA	3.25484
chr14	92159607	92160107	intron (NM_024764, intron 7 of 26)	intron (NM_024764, intron 7 of 26)	38573	NM_024764	79820	Hs.131755	NM_024764	ENSG00000133962	CATSPERB	C14orf161|CatSper(beta)	cation channel sperm associated auxiliary subunit beta	protein-coding	2.62051
chr12	127066710	127067210	Intergenic	Intergenic	107904	NR_110035	100996671	Hs.121392	NR_110034	ENSG00000256732	LOC100996671	-	uncharacterized LOC100996671	ncRNA	2.67819
chr9	123474446	123474946	intron (NM_001080497, intron 1 of 5)	MIR|SINE|MIR	2069	NM_001080497	1955	Hs.744903	NM_001080497	ENSG00000106780	MEGF9	EGFL5	multiple EGF like domains 9	protein-coding	5.21289
chr11	61728961	61729461	intron (NM_001139443, intron 8 of 8)	intron (NM_001139443, intron 8 of 8)	5921	NM_002032	2495	Hs.524910	NM_002032	ENSG00000167996	FTH1	FHC|FTH|FTHL6|HFE5|PIG15|PLIF	ferritin heavy chain 1	protein-coding	5.32368
chr17	43370704	43371650	intron (NM_003954, intron 1 of 15)	(CA)n|Simple_repeat|Simple_repeat	23253	NM_003954	9020	Hs.404183	NM_003954	ENSG00000006062	MAP3K14	FTDCR1B|HS|HSNIK|NIK	mitogen-activated protein kinase kinase kinase 14	protein-coding	3.63656
chr1	249119947	249121141	promoter-TSS (NM_001322464)	promoter-TSS (NM_001322464)	-32	NR_036070	100422879		NR_036070	ENSG00000264500	MIR3124	mir-3124	microRNA 3124	ncRNA	2.35829
chr12	117925023	117925523	intron (NM_173598, intron 14 of 19)	intron (NM_173598, intron 14 of 19)	-125666	NM_001204218	4842	Hs.654410	NM_000620	ENSG00000089250	NOS1	IHPS1|N-NOS|NC-NOS|NOS|bNOS|nNOS	nitric oxide synthase 1	protein-coding	3.23949
chr17	33406543	33407043	intron (NR_037713, intron 1 of 6)	intron (NR_037713, intron 1 of 6)	9555	NR_037713	117584	Hs.13680	NM_057178	ENSG00000092871	RFFL	CARP-2|CARP2|FRING|RIFIFYLIN|RNF189|RNF34L	ring finger and FYVE like domain containing E3 ubiquitin protein ligase	protein-coding	3.48069
chr17	29021887	29022387	Intergenic	AluSz|SINE|Alu	-14489	NR_144395	440423	Hs.628886	NR_024187		SUZ12P1	SUZ12P	SUZ12 polycomb repressive complex 2 subunit pseudogene 1	pseudo	3.63977
chr20	46121808	46122636	Intergenic	Intergenic	-8379	NM_001174087	8202	Hs.592142	NM_006534	ENSG00000124151	NCOA3	ACTR|AIB-1|AIB1|CAGH16|CTG26|KAT13B|RAC3|SRC-3|SRC3|TNRC14|TNRC16|TRAM-1|bHLHe42|pCIP	nuclear receptor coactivator 3	protein-coding	2.55826
chr2	232839679	232840179	intron (NM_001257281, intron 1 of 13)	intron (NM_001257281, intron 1 of 13)	13636	NR_046476	129563	Hs.732236	NM_152383	ENSG00000144535	DIS3L2	FAM6A|PRLMNS|hDIS3L2	DIS3 like 3'-5' exoribonuclease 2	protein-coding	inf
chr1	175638815	175639315	intron (NM_001328635, intron 1 of 22)	intron (NM_001328635, intron 1 of 22)	73687	NM_003285	7143	Hs.659864	NM_003285	ENSG00000116147	TNR	TN-R	tenascin R	protein-coding	4.6926
chr12	112549737	112550574	Intergenic	MER53|DNA|hAT	-3521	NM_024953	80018	Hs.530941	NM_024953	ENSG00000111300	NAA25	C12orf30|MDM20|NAP1	N(alpha)-acetyltransferase 25, NatB auxiliary subunit	protein-coding	2.77401
chr20	56947828	56948328	Intergenic	Intergenic	-16097	NM_001195677	9217	Hs.182625	NM_004738	ENSG00000124164	VAPB	ALS8|VAMP-B|VAP-B	VAMP associated protein B and C	protein-coding	4.07863
chr13	98825549	98826317	intron (NM_005766, intron 1 of 26)	intron (NM_005766, intron 1 of 26)	3588	NM_178861	140432	Hs.296045	NM_178861	ENSG00000139797	RNF113B	RNF161|ZNF183L1|bA10G5.1	ring finger protein 113B	protein-coding	2.59118
chr10	125235003	125235503	Intergenic	MIR3|SINE|MIR	-190618	NM_153442	2849	Hs.12751	NM_153442	ENSG00000154478	GPR26	-	G protein-coupled receptor 26	protein-coding	4.05437
chr4	77625191	77625691	intron (NM_020859, intron 2 of 10)	L2a|LINE|L2	128737	NR_039655	100616254		NR_039655	ENSG00000283682	MIR548AH	-	microRNA 548ah	ncRNA	2.36449
chr15	64316704	64317204	intron (NM_014326, intron 2 of 11)	intron (NM_014326, intron 2 of 11)	21567	NM_014326	23604	Hs.237886	NM_014326	ENSG00000035664	DAPK2	DRP-1|DRP1	death associated protein kinase 2	protein-coding	4.97376
chr1	12678512	12679349	Intergenic	Intergenic	-1194	NM_004753	9249	Hs.289347	NM_004753	ENSG00000162496	DHRS3	DD83.1|RDH17|Rsdr1|SDR1|SDR16C1|retSDR1	dehydrogenase/reductase 3	protein-coding	4.01314
chr5	169734475	169734975	Intergenic	Intergenic	-9879	NM_005565	3937	Hs.304475	NM_005565	ENSG00000043462	LCP2	SLP-76|SLP76	lymphocyte cytosolic protein 2	protein-coding	2.53447
chr15	90371697	90372197	Intergenic	Intergenic	-13875	NM_001150	290	Hs.1239	NM_001150	ENSG00000166825	ANPEP	APN|CD13|GP150|LAP1|P150|PEPN	alanyl aminopeptidase, membrane	protein-coding	2.79119
chr20	10020669	10021169	intron (NM_198798, intron 2 of 9)	intron (NM_198798, intron 2 of 9)	5272	NM_198798	63926	Hs.70903	NM_022096	ENSG00000132623	ANKEF1	ANKRD5	ankyrin repeat and EF-hand domain containing 1	protein-coding	3.29762
chr7	45283509	45284009	Intergenic	Intergenic	86392	NM_005856	10268	Hs.25691	NM_005856	ENSG00000122679	RAMP3	-	receptor activity modifying protein 3	protein-coding	2.61879
chr16	22364673	22365173	intron (NM_001802, intron 2 of 4)	MER34B|LTR|ERV1	21015	NM_001802	1039	Hs.513430	NM_001802	ENSG00000140743	CDR2	CDR62|Yo	cerebellar degeneration related protein 2	protein-coding	3.36041
chr9	99328614	99329715	promoter-TSS (NM_001077181)	promoter-TSS (NM_001077181)	38	NM_001077181	8555	Hs.40582	NM_003671	ENSG00000081377	CDC14B	CDC14B3|Cdc14B1|Cdc14B2|hCDC14B	cell division cycle 14B	protein-coding	3.64609
chr10	112247737	112248491	Intergenic	Intergenic	-9511	NM_004419	1847	Hs.2128	NM_004419	ENSG00000138166	DUSP5	DUSP|HVH3	dual specificity phosphatase 5	protein-coding	2.35137
chr8	63077114	63077614	Intergenic	L1PB1|LINE|L1	-84137	NR_130764	286183	Hs.654662	NM_173688	ENSG00000185942	NKAIN3	FAM77D	Sodium/potassium transporting ATPase interacting 3	protein-coding	2.48354
chr4	114276579	114277272	exon (NM_001148, exon 38 of 46)	exon (NM_001148, exon 38 of 46)	203488	NR_107049	102465878		NR_107049	ENSG00000275810	MIR8082	hsa-mir-8082	microRNA 8082	ncRNA	3.71889
chr9	85914444	85914944	intron (NM_001244959, intron 10 of 14)	intron (NM_001244959, intron 10 of 14)	32182	NM_001244961	257019	Hs.127535	NM_174938	ENSG00000172159	FRMD3	4.1O|EPB41L4O|EPB41LO|P410	FERM domain containing 3	protein-coding	3.73072
chr10	73373106	73373606	intron (NM_052836, intron 9 of 12)	intron (NM_052836, intron 9 of 12)	-101679	NR_120672	102723377	Hs.568789	NR_120672	ENSG00000223817	CDH23-AS1	C10orf106|NCRNA00223|bA327E2.3	CDH23 antisense RNA 1	ncRNA	2.75581
chr5	5349598	5350098	Intergenic	Intergenic	-72938	NM_015325	23379	Hs.449296	NM_015325	ENSG00000164151	ICE1	KIAA0947	interactor of little elongation complex ELL subunit 1	protein-coding	4.34886
chr6	152635239	152635739	intron (NM_182961, intron 87 of 145)	intron (NM_182961, intron 87 of 145)	-66176	NR_120501	100505475	Hs.571203	NR_120501		SYNE1-AS1	-	SYNE1 antisense RNA 1	ncRNA	2.54026
chr20	31187673	31188173	intron (NR_034152, intron 1 of 2)	intron (NR_034152, intron 1 of 2)	12642	NR_034152	149950	Hs.516980	NM_001010976	ENSG00000204393	LOC149950	-	uncharacterized LOC149950	ncRNA	3.83847
chr15	74232866	74233855	intron (NM_005576, intron 1 of 6)	intron (NM_005576, intron 1 of 6)	-12772	NR_040069	100287616	Hs.599785	NR_040066	ENSG00000261801	LOXL1-AS1	-	LOXL1 antisense RNA 1	ncRNA	3.38005
chr1	38189292	38189792	intron (NM_001099439, intron 8 of 16)	L2c|LINE|L2	31469	NM_001256875	55143	Hs.524571	NM_018101	ENSG00000134690	CDCA8	BOR|BOREALIN|DasraB|MESRGP	cell division cycle associated 8	protein-coding	4.77887
chr19	16568112	16568813	intron (NM_021235, intron 1 of 22)	intron (NM_021235, intron 1 of 22)	14360	NM_001258374	58513	Hs.654639	NM_021235	ENSG00000127527	EPS15L1	EPS15R	epidermal growth factor receptor pathway substrate 15 like 1	protein-coding	2.57822
chr21	45690636	45691136	Intergenic	AluSz6|SINE|Alu	-8787	NM_013369	29947	Hs.592165	NM_013369	ENSG00000142182	DNMT3L	-	DNA methyltransferase 3 like	protein-coding	2.73089
chr17	70452096	70452596	intron (NR_137281, intron 1 of 4)	MIRc|SINE|MIR	113394	NR_135222	146795	Hs.651743	NR_135222	ENSG00000264026	LINC02003	-	long intergenic non-protein coding RNA 2003	ncRNA	3.41393
chr11	67124653	67125153	intron (NR_024469, intron 2 of 3)	intron (NR_024469, intron 2 of 3)	-3836	NM_021173	57804	Hs.523829	NM_021173	ENSG00000175482	POLD4	POLDS|p12	DNA polymerase delta 4, accessory subunit	protein-coding	3.87354
chr6	107022482	107022982	intron (NM_001318746, intron 8 of 8)	intron (NM_001318746, intron 8 of 8)	54641	NM_032730	84816	Hs.155839	NM_032730	ENSG00000130347	RTN4IP1	NIMP|OPA10	reticulon 4 interacting protein 1	protein-coding	3.47656
chr10	95972945	95973445	intron (NM_016341, intron 4 of 32)	intron (NM_016341, intron 4 of 32)	73632	NR_033969	100128054	Hs.677562	NR_033969	ENSG00000268894	PLCE1-AS1	-	PLCE1 antisense RNA 1	ncRNA	4.27617
chr15	86905701	86906201	intron (NM_152336, intron 17 of 24)	L1MA9|LINE|L1	-45752	NR_046012	727915	Hs.451281	NR_046012	ENSG00000260125	AGBL1-AS1	-	AGBL1 antisense RNA 1	ncRNA	2.44834
chr1	92295813	92296313	intron (NR_036634, intron 2 of 17)	intron (NR_036634, intron 2 of 17)	55773	NM_003243	7049	Hs.482390	NM_003243	ENSG00000069702	TGFBR3	BGCAN|betaglycan	transforming growth factor beta receptor 3	protein-coding	2.69451
chr19	4521444	4522052	TTS (NM_001013706)	TTS (NM_001013706)	-4032	NM_001080400	729359	Hs.591387	NM_001080400	ENSG00000167676	PLIN4	KIAA1881|S3-12	perilipin 4	protein-coding	3.53589
chr18	34099310	34099810	intron (NM_025135, intron 5 of 24)	intron (NM_025135, intron 5 of 24)	143821	NR_132982	105372071		NR_132982		LOC105372071	-	uncharacterized LOC105372071	ncRNA	2.78654
chr2	70016236	70016736	intron (NM_001320698, intron 5 of 14)	intron (NM_001320698, intron 5 of 14)	-40252	NM_178439	64395	Hs.293971	NM_178439	ENSG00000087338	GMCL1	BTBD13|GCL|GCL1|SPATA29	germ cell-less, spermatogenesis associated 1	protein-coding	2.61564
chr20	62825574	62826074	intron (NM_004535, intron 2 of 22)	intron (NM_004535, intron 2 of 22)	29997	NM_004535	4661	Hs.279562	NM_004535	ENSG00000196132	MYT1	C20orf36|MTF1|MYTI|NZF2|PLPB1|ZC2H2C1|ZC2HC4A	myelin transcription factor 1	protein-coding	4.20515
chr2	235892497	235892997	intron (NM_014521, intron 1 of 5)	intron (NM_014521, intron 1 of 5)	32119	NM_014521	23677	Hs.516777	NM_014521	ENSG00000130147	SH3BP4	BOG25|TTP	SH3 domain binding protein 4	protein-coding	2.33845
chr15	63101695	63102195	intron (NM_015059, intron 48 of 55)	intron (NM_015059, intron 48 of 55)	-14211	NR_029709	406965		NR_029709	ENSG00000211137	MIR190A	MIR190|MIRN190|hsa-mir-190a|miR-190|mir-190a	microRNA 190a	ncRNA	3.22577
chr15	85199815	85200315	intron (NM_021077, intron 2 of 2)	intron (NM_021077, intron 2 of 2)	1737	NM_021077	4828	Hs.386470	NM_021077	ENSG00000197696	NMB	-	neuromedin B	protein-coding	5.58727
chr5	37792923	37793423	Intergenic	Intergenic	41751	NM_001278098	2668	Hs.248114	NM_000514	ENSG00000168621	GDNF	ATF|ATF1|ATF2|HFB1-GDNF|HSCR3	glial cell derived neurotrophic factor	protein-coding	2.8551
chr7	151125568	151126068	TTS (NR_131779)	TTS (NR_131779)	4907	NR_037468	100500835		NR_037468	ENSG00000265810	MIR3907	-	microRNA 3907	ncRNA	3.07677
chr2	218798923	218799670	intron (NM_022648, intron 1 of 32)	intron (NM_022648, intron 1 of 32)	9499	NM_022648	7145	Hs.471381	NM_022648	ENSG00000079308	TNS1	MST091|MST122|MST127|MSTP091|MSTP122|MSTP127|MXRA6|PPP1R155|TNS	tensin 1	protein-coding	2.56865
chr6	169420005	169420505	Intergenic	Intergenic	15483	NR_134622	101929460	Hs.355225	NR_134622	ENSG00000229720	LOC101929460	-	uncharacterized LOC101929460	ncRNA	2.64249
chr18	19019306	19019806	exon (NM_001142966, exon 8 of 33)	exon (NM_001142966, exon 8 of 33)	161137	NM_052911	114799	Hs.464733	NM_052911	ENSG00000141446	ESCO1	A930014I12Rik|CTF|ECO1|EFO1|ESO1	establishment of sister chromatid cohesion N-acetyltransferase 1	protein-coding	2.38857
chr15	100824425	100824925	intron (NM_139057, intron 3 of 21)	intron (NM_139057, intron 3 of 21)	57535	NM_139057	170691	Hs.513200	NM_139057	ENSG00000140470	ADAMTS17	-	ADAM metallopeptidase with thrombospondin type 1 motif 17	protein-coding	4.73754
chr1	111065586	111066086	Intergenic	Intergenic	-4039	NM_005549	3744	Hs.248140	NM_005549	ENSG00000143105	KCNA10	Kcn1|Kv1.8	potassium voltage-gated channel subfamily A member 10	protein-coding	5.02167
chr1	46982754	46983254	Intergenic	Intergenic	10336	NM_172225	127343	Hs.375623	NM_147192	ENSG00000197587	DMBX1	MBX|OTX3|PAXB	diencephalon/mesencephalon homeobox 1	protein-coding	2.46057
chr5	71774402	71775207	intron (NM_152625, intron 1 of 4)	intron (NM_152625, intron 1 of 4)	28444	NM_152625	167465	Hs.224794	NM_152625	ENSG00000178175	ZNF366	DCSCRIPT	zinc finger protein 366	protein-coding	inf
chr12	31773233	31773733	Intergenic	Intergenic	-26611	NM_001135864	254013	Hs.740628	NM_173802	ENSG00000139160	ETFBKMT	C12orf72|ETFB-KMT|METTL20	electron transfer flavoprotein beta subunit lysine methyltransferase	protein-coding	2.77864
chr5	134996479	134996979	Intergenic	Intergenic	-7105	NR_027127	340074	Hs.434633	NR_027127	ENSG00000251045	LINC01959	-	long intergenic non-protein coding RNA 1959	ncRNA	4.89721
chr19	13413243	13413743	intron (NM_001127221, intron 17 of 46)	intron (NM_001127221, intron 17 of 46)	152211	NM_004907	9592	Hs.501629	NM_004907	ENSG00000160888	IER2	ETR101	immediate early response 2	protein-coding	2.99594
chr19	18950315	18950815	intron (NM_001297549, intron 1 of 23)	intron (NM_001297549, intron 1 of 23)	7821	NM_002911	5976	Hs.515266	NM_002911	ENSG00000005007	UPF1	HUPF1|NORF1|RENT1|pNORF1|smg-2	UPF1, RNA helicase and ATPase	protein-coding	4.5417
chr10	90188242	90188742	intron (NM_001031709, intron 4 of 6)	intron (NM_001031709, intron 4 of 6)	154590	NM_018363	55328	Hs.149849	NM_018363	ENSG00000184719	RNLS	C10orf59|RENALASE	renalase, FAD dependent amine oxidase	protein-coding	4.21549
chr5	156962611	156963111	intron (NM_033274, intron 4 of 22)	intron (NM_033274, intron 4 of 22)	39970	NM_033274	8728	Hs.483944	NM_023038	ENSG00000135074	ADAM19	FKSG34|MADDAM|MLTNB	ADAM metallopeptidase domain 19	protein-coding	4.55888
chr1	174595103	174595603	intron (NM_014857, intron 13 of 20)	intron (NM_014857, intron 13 of 20)	-173682	NM_001330989	9910	Hs.585378	NM_014857	ENSG00000152061	RABGAP1L	HHL|TBC1D18	RAB GTPase activating protein 1 like	protein-coding	4.97753
chr15	74129886	74130386	Intergenic	Intergenic	-35791	NM_153356	161514	Hs.124512	NM_153356	ENSG00000167139	TBC1D21	MgcRabGAP	TBC1 domain family member 21	protein-coding	4.38587
chr3	138405503	138406193	intron (NM_006219, intron 14 of 21)	intron (NM_006219, intron 14 of 21)	20615	NM_001256045	5291	Hs.239818	NM_006219	ENSG00000051382	PIK3CB	P110BETA|PI3K|PI3KBETA|PIK3C1	phosphatidylinositol-4,5-bisphosphate 3-kinase catalytic subunit beta	protein-coding	4.12676
chr1	113188631	113189131	intron (NM_006135, intron 1 of 9)	L1M5|LINE|L1	26806	NM_006135	829	Hs.744974	NM_006135	ENSG00000116489	CAPZA1	CAPPA1|CAPZ|CAZ1	capping actin protein of muscle Z-line alpha subunit 1	protein-coding	4.24735
chr1	52382195	52382907	3' UTR (NM_002867, exon 5 of 5)	3' UTR (NM_002867, exon 5 of 5)	-37942	NM_001101662	4898	Hs.584782	NM_002525	ENSG00000078618	NRDC	NRD1|hNRD1|hNRD2	nardilysin convertase	protein-coding	2.48458
chr3	108851920	108852420	Intergenic	Intergenic	-3391	NR_033977	401081	Hs.280892	NR_033977	ENSG00000241224	FLJ22763	-	uncharacterized LOC401081	ncRNA	2.66757
chr3	139835854	139836354	intron (NM_022131, intron 1 of 16)	intron (NM_022131, intron 1 of 16)	182077	NM_022131	64084	Hs.158529	NM_022131	ENSG00000158258	CLSTN2	ALC-GAMMA|CDHR13|CS2|CSTN2|alcagamma	calsyntenin 2	protein-coding	2.77573
chr13	31419756	31420256	Intergenic	MER74A|LTR|ERVL	-36693	NR_103813	440132	Hs.729493	NR_103813	ENSG00000236094	LINC00545	-	long intergenic non-protein coding RNA 545	ncRNA	2.81621
chr11	44612258	44612758	intron (NM_002231, intron 2 of 9)	intron (NM_002231, intron 2 of 9)	25367	NM_001024844	3732	Hs.527778	NM_002231	ENSG00000085117	CD82	4F9|C33|GR15|IA4|KAI1|R2|SAR2|ST6|TSPAN27	CD82 molecule	protein-coding	4.86542
chr7	148317773	148318273	Intergenic	Intergenic	30366	NM_145304	202865	Hs.352212	NM_145304	ENSG00000170279	C7orf33	-	chromosome 7 open reading frame 33	protein-coding	3.04056
chr17	7875402	7875902	Intergenic	Intergenic	-30336	NM_000180	3000	Hs.592109	NM_000180	ENSG00000132518	GUCY2D	CORD5|CORD6|CYGD|GUC1A4|GUC2D|LCA|LCA1|RCD2|RETGC-1|ROS-GC1|ROSGC|retGC	guanylate cyclase 2D, retinal	protein-coding	4.31585
chr9	682634	683296	intron (NM_001256877, intron 3 of 12)	intron (NM_001256877, intron 3 of 12)	-23841	NM_153186	23189	Hs.306764	NM_015158	ENSG00000107104	KANK1	ANKRD15|CPSQ2|KANK	KN motif and ankyrin repeat domains 1	protein-coding	2.7166
chr20	25650362	25650862	intron (NR_126465, intron 2 of 3)	intron (NR_126465, intron 2 of 3)	16963	NM_001290261	26152	Hs.61881	NM_015655	ENSG00000130684	ZNF337	-	zinc finger protein 337	protein-coding	2.77357
chr10	121076451	121076951	intron (NM_005308, intron 1 of 15)	intron (NM_005308, intron 1 of 15)	-60783	NR_039829	100616398		NR_039829	ENSG00000265719	MIR4681	-	microRNA 4681	ncRNA	2.90199
chr18	20871832	20872332	Intergenic	Intergenic	136293	NM_138375	91768	Hs.11108	NM_138375	ENSG00000134508	CABLES1	CABL1|CABLES|HsT2563|IK3-1	Cdk5 and Abl enzyme substrate 1	protein-coding	2.741
chr9	133002162	133002662	Intergenic	Intergenic	-25746	NM_001291815	256158	Hs.32194	NM_144655	ENSG00000148357	HMCN2	-	hemicentin 2	protein-coding	3.79634
chr17	71646288	71646788	Intergenic	Intergenic	-6311	NM_001144952	54549	Hs.435719	NM_019064	ENSG00000069188	SDK2	-	sidekick cell adhesion molecule 2	protein-coding	3.68032
chr5	157714735	157715235	Intergenic	Intergenic	121796	NR_109888	101927697	Hs.483960	NR_109888	ENSG00000276778	LOC101927697	-	uncharacterized LOC101927697	ncRNA	2.36953
chr2	197902568	197903068	intron (NM_001195144, intron 16 of 27)	L1MC1|LINE|L1	-111363	NM_001321099	80055	Hs.229988	NM_024989	ENSG00000197121	PGAP1	Bst1|ISPD3024|MRT42|SPG67	post-GPI attachment to proteins 1	protein-coding	4.13097
chr15	89618417	89618917	Intergenic	L2c|LINE|L2	-12714	NM_007011	11057	Hs.122337	NM_007011	ENSG00000140526	ABHD2	HS1-2|LABH2|PHPS1-2	abhydrolase domain containing 2	protein-coding	3.30549
chr9	134602645	134603145	intron (NM_001304275, intron 1 of 23)	MIR3|SINE|MIR	10030	NM_005312	2889	Hs.127897	NM_005312	ENSG00000107263	RAPGEF1	C3G|GRF2	Rap guanine nucleotide exchange factor 1	protein-coding	2.67247
chr6	150245981	150246481	Intergenic	Intergenic	-1943	NR_130110	353091	Hs.535023	NM_001001788	ENSG00000203722	RAET1G	ULBP5	retinoic acid early transcript 1G	protein-coding	4.38332
chr5	9197922	9198422	intron (NM_003966, intron 9 of 22)	intron (NM_003966, intron 9 of 22)	-144165	NR_039779	100616326		NR_039779	ENSG00000266415	MIR4636	mir-4636	microRNA 4636	ncRNA	2.46337
chr10	30712729	30713229	Intergenic	AluSq|SINE|Alu	-9971	NM_001244134	1326	Hs.432453	NM_005204	ENSG00000107968	MAP3K8	AURA2|COT|EST|ESTF|MEKK8|TPL2|Tpl-2|c-COT	mitogen-activated protein kinase kinase kinase 8	protein-coding	2.91728
chr10	102490761	102491261	Intergenic	CpG	-4455	NM_001304569	5076	Hs.155644	NM_000278	ENSG00000075891	PAX2	FSGS7|PAPRS	paired box 2	protein-coding	3.27639
chr22	43244920	43245583	intron (NM_001142293, intron 1 of 14)	MLT1F|LTR|ERVL-MaLR	8156	NM_001142293	26286	Hs.685225	NM_014570	ENSG00000242247	ARFGAP3	ARFGAP1	ADP ribosylation factor GTPase activating protein 3	protein-coding	2.77641
chr8	123792243	123793010	Intergenic	CpG	-1274	NM_014943	22882	Hs.377090	NM_014943	ENSG00000178764	ZHX2	AFR1|RAF	zinc fingers and homeoboxes 2	protein-coding	2.8426
chr8	91523504	91524004	Intergenic	AluSz6|SINE|Alu	94537	NR_104062	101937451	Hs.583685	NR_104062	ENSG00000253799	LINC01030	-	long intergenic non-protein coding RNA 1030	ncRNA	3.84616
chr8	130944269	130944769	intron (NR_046360, intron 2 of 14)	LTR40a|LTR|ERVL	7599	NR_046359	51571	Hs.126941	NM_016623	ENSG00000153310	FAM49B	BM-009|L1	family with sequence similarity 49 member B	protein-coding	4.34772
chr1	53102627	53103127	intron (NM_001042693, intron 1 of 2)	intron (NM_001042693, intron 1 of 2)	3861	NM_001042693	348378	Hs.424589	NM_001042693	ENSG00000182183	FAM159A	PRO7171|WWLS2783	family with sequence similarity 159 member A	protein-coding	4.66223
chr9	137220150	137220650	intron (NM_002957, intron 1 of 9)	intron (NM_002957, intron 1 of 9)	2091	NM_002957	6256	Hs.590886	NM_002957	ENSG00000186350	RXRA	NR2B1	retinoid X receptor alpha	protein-coding	2.71487
chr1	24373585	24374085	Intergenic	Intergenic	64830	NM_152372	127294	Hs.523413	NM_152372	ENSG00000142661	MYOM3	-	myomesin 3	protein-coding	2.81992
chr8	139976949	139977925	Intergenic	Intergenic	-51188	NM_152888	169044	Hs.117169	NM_152888	ENSG00000169436	COL22A1	-	collagen type XXII alpha 1 chain	protein-coding	3.3902
chr11	115787359	115787859	Intergenic	Intergenic	-156691	NR_034148	283143	Hs.130499	NR_034148		LINC00900	-	long intergenic non-protein coding RNA 900	ncRNA	5.01037
chr9	139760201	139761063	intron (NM_001281299, intron 1 of 4)	intron (NM_001281299, intron 1 of 4)	156	NM_153200	8721	Hs.174050	NM_003792	ENSG00000107223	EDF1	CFAP280|EDF-1|MBF1	endothelial differentiation related factor 1	protein-coding	2.49111
chr5	134794544	134795044	Intergenic	Intergenic	-6705	NM_001099221	497189	Hs.552091	NM_001099221	ENSG00000255833	TIFAB	-	TIFA inhibitor	protein-coding	2.5517
chr17	14845814	14846314	Intergenic	Intergenic	-72058	NR_135638	101928475	Hs.638944	NR_135638	ENSG00000232058	LOC101928475	-	uncharacterized LOC101928475	ncRNA	3.15319
chr17	48763982	48764482	intron (NM_003786, intron 29 of 30)	intron (NM_003786, intron 29 of 30)	21038	NM_052855	91369	Hs.463426	NM_052855	ENSG00000154945	ANKRD40	-	ankyrin repeat domain 40	protein-coding	3.33995
chr1	53490660	53491160	intron (NM_001007100, intron 1 of 4)	L2a|LINE|L2	10300	NM_001007100	6342	Hs.476365	NM_002979	ENSG00000116171	SCP2	NLTP|NSL-TP|SCP-2|SCP-CHI|SCP-X|SCPX	sterol carrier protein 2	protein-coding	3.42806
chr11	79106230	79106730	intron (NM_001098816, intron 1 of 33)	intron (NM_001098816, intron 1 of 33)	6673	NR_030598	100126333		NR_030598	ENSG00000211997	MIR708	MIRN708|hsa-mir-708	microRNA 708	ncRNA	5.30724
chr5	175917246	175917746	intron (NM_014613, intron 4 of 10)	intron (NM_014613, intron 4 of 10)	42140	NM_014613	23197	Hs.484242	NM_014613	ENSG00000113194	FAF2	ETEA|UBXD8|UBXN3B	Fas associated factor family member 2	protein-coding	2.59789
chr16	1139708	1140208	3' UTR (NM_207419, exon 5 of 5)	3' UTR (NM_207419, exon 5 of 5)	6286	NM_207419	390664	Hs.527853	NM_207419	ENSG00000184471	C1QTNF8	CTRP8|UNQ5829	C1q and tumor necrosis factor related protein 8	protein-coding	2.93382
chr10	102250199	102250699	intron (NM_015490, intron 20 of 25)	intron (NM_015490, intron 20 of 25)	27637	NM_003393	7479	Hs.421281	NM_003393	ENSG00000075290	WNT8B	-	Wnt family member 8B	protein-coding	4.7914
chr17	18927950	18928450	intron (NM_006613, intron 3 of 4)	intron (NM_006613, intron 3 of 4)	-20140	NM_001039999	644815	Hs.710727	NM_001039999	ENSG00000188522	FAM83G	PAWS1	family with sequence similarity 83 member G	protein-coding	2.42771
chr1	46974861	46975361	intron (NM_172225, intron 1 of 3)	intron (NM_172225, intron 1 of 3)	2443	NM_172225	127343	Hs.375623	NM_147192	ENSG00000197587	DMBX1	MBX|OTX3|PAXB	diencephalon/mesencephalon homeobox 1	protein-coding	3.38266
chr20	3061590	3062090	Intergenic	Intergenic	3530	NM_000490	551	Hs.89648	NM_000490	ENSG00000101200	AVP	ADH|ARVP|AVP-NPII|AVRP|VP	arginine vasopressin	protein-coding	3.4306
chr17	36598768	36599268	intron (NM_001199417, intron 1 of 23)	L2b|LINE|L2	14298	NM_001199417	57636	Hs.374446	NM_020876	ENSG00000275832	ARHGAP23	-	Rho GTPase activating protein 23	protein-coding	3.55283
chr11	61298368	61298868	intron (NM_001252065, intron 5 of 9)	intron (NM_001252065, intron 5 of 9)	22346	NM_001145077	390205	Hs.441122	NM_001145077	ENSG00000204950	LRRC10B	-	leucine rich repeat containing 10B	protein-coding	4.82766
chr18	19810335	19811066	Intergenic	Intergenic	61303	NM_005257	2627	Hs.514746	NM_005257	ENSG00000141448	GATA6	-	GATA binding protein 6	protein-coding	3.30791
chr8	126524552	126525052	Intergenic	MIR3|SINE|MIR	80351	NM_001282985	10221	Hs.444947	NM_025195	ENSG00000173334	TRIB1	C8FW|GIG-2|GIG2|SKIP1|TRB-1|TRB1	tribbles pseudokinase 1	protein-coding	3.43498
chr16	4207227	4207727	Intergenic	AluJr|SINE|Alu	-41291	NM_001116	115	Hs.391860	NM_001116	ENSG00000162104	ADCY9	AC9|ACIX	adenylate cyclase 9	protein-coding	4.16092
chr1	24516646	24517146	Intergenic	Charlie13a|DNA|hAT-Charlie	-3131	NM_173064	163702	Hs.221375	NM_170743	ENSG00000185436	IFNLR1	CRF2/12|IFNLR|IL-28R1|IL28RA|LICR2	interferon lambda receptor 1	protein-coding	2.83525
chr15	83525244	83525744	intron (NM_199330, intron 5 of 8)	intron (NM_199330, intron 5 of 8)	47114	NM_001080435	123720	Hs.377360	NM_001080435	ENSG00000156232	WHAMM	WHAMM1|WHDC1	WAS protein homolog associated with actin, golgi membranes and microtubules	protein-coding	4.10639
chr5	31990393	31990893	intron (NM_178140, intron 3 of 24)	intron (NM_178140, intron 3 of 24)	-54378	NR_036241	100422874		NR_036241	ENSG00000266243	MIR4279	-	microRNA 4279	ncRNA	2.41522
chr6	52752886	52753386	Intergenic	Intergenic	21360	NM_000847	2940	Hs.102484	NM_000847	ENSG00000174156	GSTA3	GSTA3-3|GTA3	glutathione S-transferase alpha 3	protein-coding	3.42244
chr15	40395178	40396039	intron (NM_001003943, intron 3 of 3)	intron (NM_001003943, intron 3 of 3)	2678	NM_001003942	90427	Hs.591104	NM_033503	ENSG00000104081	BMF	-	Bcl2 modifying factor	protein-coding	4.29597
chr11	114068585	114069258	intron (NM_001018011, intron 4 of 6)	intron (NM_001018011, intron 4 of 6)	-97613	NM_006169	4837	Hs.503911	NM_006169	ENSG00000166741	NNMT	-	nicotinamide N-methyltransferase	protein-coding	3.12587
chrX	76307946	76308446	Intergenic	Intergenic	-73239	NR_110406	101928469	Hs.640805	NR_110400	ENSG00000280870	MIR325HG	MIR384HG	MIR325 host gene	ncRNA	3.18233
chr11	112413061	112413561	TTS (NR_120559)	TTS (NR_120559)	13214	NR_104155	387810	Hs.512255	NR_104155	ENSG00000255484	LOC387810	-	uncharacterized LOC387810	ncRNA	4.42818
chr1	225858528	225859028	Intergenic	MLT2A2|LTR|ERVL	-17933	NM_018212	55740	Hs.497893	NM_018212	ENSG00000154380	ENAH	ENA|MENA|NDPP1	enabled homolog (Drosophila)	protein-coding	3.1474
chr8	121839809	121840309	Intergenic	MIRb|SINE|MIR	-15750	NM_021021	6641	Hs.46701	NM_021021	ENSG00000172164	SNTB1	59-DAP|A1B|BSYN2|DAPA1B|SNT2|SNT2B1|TIP-43	syntrophin beta 1	protein-coding	4.71376
chr1	174128166	174129727	promoter-TSS (NR_121197)	promoter-TSS (NR_121197)	395	NM_014857	9910	Hs.585378	NM_014857	ENSG00000152061	RABGAP1L	HHL|TBC1D18	RAB GTPase activating protein 1 like	protein-coding	2.89805
chr1	197744505	197745249	promoter-TSS (NM_001195215)	promoter-TSS (NM_001195215)	-254	NR_125340	163486	Hs.125056	NM_019049	ENSG00000213047	DENND1B	C1ORF18|C1orf218|FAM31B	DENN domain containing 1B	protein-coding	2.51245
chr18	43515554	43516054	intron (NM_020964, intron 10 of 43)	intron (NM_020964, intron 10 of 43)	31501	NM_020964	57724	Hs.514843	NM_020964	ENSG00000152223	EPG5	HEEW1|KIAA1632|VICIS	ectopic P-granules autophagy protein 5 homolog	protein-coding	3.10215
chr3	120397434	120397934	intron (NM_000187, intron 1 of 13)	intron (NM_000187, intron 1 of 13)	3734	NM_000187	3081	Hs.368254	NM_000187	ENSG00000113924	HGD	AKU|HGO	homogentisate 1,2-dioxygenase	protein-coding	3.43238
chr17	43809950	43810903	intron (NM_001303016, intron 3 of 12)	intron (NM_001303016, intron 3 of 12)	-51219	NM_001145146	1394	Hs.417628	NM_004382	ENSG00000120088	CRHR1	CRF-R|CRF-R-1|CRF-R1|CRF1|CRFR-1|CRFR1|CRH-R-1|CRH-R1|CRHR|CRHR1L	corticotropin releasing hormone receptor 1	protein-coding	3.56983
chr1	55411093	55411593	Intergenic	Intergenic	-34994	NM_182532	199964	Hs.663950	NM_182532	ENSG00000143001	TMEM61	-	transmembrane protein 61	protein-coding	3.59891
chr20	43272106	43272862	intron (NR_136160, intron 1 of 10)	L2a|LINE|L2	7915	NM_001322051	100	Hs.654536	NM_000022	ENSG00000196839	ADA	-	adenosine deaminase	protein-coding	2.74264
chr10	119421535	119422035	Intergenic	Intergenic	-117206	NR_002791	196047	Hs.312592	NR_002791	ENSG00000229847	EMX2OS	EMX2-AS1|NCRNA00045	EMX2 opposite strand/antisense RNA	ncRNA	4.17512
chr5	63959094	63959594	Intergenic	AluSz|SINE|Alu	-26791	NM_001164442	100132916	Hs.591776	NM_001164442	ENSG00000145642	FAM159B	-	family with sequence similarity 159 member B	protein-coding	2.47209
chr21	45626035	45626535	Intergenic	MLT1C|LTR|ERVL-MaLR	34602	NM_001283050	23308	Hs.14155	NM_015259	ENSG00000160223	ICOSLG	B7-H2|B7H2|B7RP-1|B7RP1|CD275|GL50|ICOS-L|ICOSL|LICOS	inducible T-cell costimulator ligand	protein-coding	3.33254
chrX	152988632	152989132	intron (NM_001256447, intron 1 of 7)	CpG	674	NM_001139457	10134	Hs.522817	NM_005745	ENSG00000185825	BCAP31	6C6-AG|BAP31|CDM|DDCH|DXS1357E	B-cell receptor-associated protein 31	protein-coding	2.81002
chr1	89078302	89078802	intron (NR_110682, intron 1 of 3)	intron (NR_110682, intron 1 of 3)	-71275	NM_001320709	5586	Hs.440833	NM_006256	ENSG00000065243	PKN2	PAK2|PRK2|PRKCL2|PRO2042|Pak-2|STK7	protein kinase N2	protein-coding	2.37508
chr2	53108722	53109222	Intergenic	Intergenic	-179219	NR_039630	100616431		NR_039630	ENSG00000264975	MIR4431	-	microRNA 4431	ncRNA	4.63547
chr20	56010828	56011328	Intergenic	Intergenic	44624	NM_001291780	55544	Hs.236361	NM_017495	ENSG00000132819	RBM38	HSRNASEB|RNPC1|SEB4B|SEB4D|dJ800J21.2	RNA binding motif protein 38	protein-coding	4.87069
chr7	47845009	47845509	intron (NM_138295, intron 52 of 56)	intron (NM_138295, intron 52 of 56)	10370	NM_001302627	80099	Hs.287647	NM_025031		C7orf69	-	chromosome 7 open reading frame 69	protein-coding	5.1892
chr10	79221331	79221831	intron (NM_001322832, intron 1 of 27)	intron (NM_001322832, intron 1 of 27)	110951	NR_126365	101929286	Hs.568867	NR_126365		KCNMA1-AS3	-	KCNMA1 antisense RNA 3	ncRNA	4.57494
chr16	65426691	65427191	intron (NR_027755, intron 2 of 8)	intron (NR_027755, intron 2 of 8)	183262	NR_027755	283867	Hs.444774	NM_001101346	ENSG00000261742	LINC00922	-	long intergenic non-protein coding RNA 922	ncRNA	3.51978
chr14	73893419	73893919	intron (NM_001005743, intron 1 of 12)	AluJb|SINE|Alu	31617	NM_001005744	8650	Hs.525443	NM_003744	ENSG00000133961	NUMB	C14orf41|S171|c14_5527	NUMB, endocytic adaptor protein	protein-coding	4.31737
chr20	56628710	56629210	Intergenic	Intergenic	-97023	NM_178456	128602	Hs.43977	NM_178456	ENSG00000124237	C20orf85	LLC1|bA196N14.1	chromosome 20 open reading frame 85	protein-coding	4.4424
chr14	75039753	75040541	intron (NM_000428, intron 3 of 35)	LTR33|LTR|ERVL	38887	NM_000428	4053	Hs.512776	NM_000428	ENSG00000119681	LTBP2	C14orf141|GLC3D|LTBP3|MSPKA|MSTP031|WMS3	latent transforming growth factor beta binding protein 2	protein-coding	2.6095
chr9	99139516	99140229	intron (NR_104627, intron 1 of 12)	MER65C|LTR|ERV1	6119	NR_104627	11046	Hs.494556	NM_007001	ENSG00000130958	SLC35D2	HFRC1|SQV7L|UGTrel8|hfrc	solute carrier family 35 member D2	protein-coding	2.38202
chr20	57617208	57618186	intron (NM_016045, intron 1 of 5)	CpG	204	NR_037929	100533975	Hs.656865	NR_037929		SLMO2-ATP5E	-	SLMO2-ATP5E readthrough	ncRNA	2.43548
chr1	26857000	26857500	intron (NM_002953, intron 1 of 21)	intron (NM_002953, intron 1 of 21)	1001	NM_002953	6195	Hs.149957	NM_002953	ENSG00000117676	RPS6KA1	HU-1|MAPKAPK1A|RSK|RSK1|p90Rsk	ribosomal protein S6 kinase A1	protein-coding	3.62977
chr19	46700859	46701359	intron (NR_135234, intron 2 of 2)	intron (NR_135234, intron 2 of 2)	5210	NR_135234	645553	Hs.613068	NR_135234		IGFL2-AS1	-	IGFL2 antisense RNA 1	ncRNA	3.68922
chr5	11214908	11215408	intron (NR_109988, intron 8 of 21)	L2a|LINE|L2	373871	NM_001288715	1501	Hs.314543	NM_001332	ENSG00000169862	CTNND2	GT24|NPRAP	catenin delta 2	protein-coding	2.97896
chr7	139440314	139440814	intron (NM_001113239, intron 1 of 14)	intron (NM_001113239, intron 1 of 14)	37129	NM_022740	28996	Hs.731417	NM_022740	ENSG00000064393	HIPK2	PRO0593	homeodomain interacting protein kinase 2	protein-coding	4.28629
chr3	44037320	44037820	Intergenic	CpG	-118134	NR_029700	406929		NR_029700	ENSG00000207954	MIR138-1	MIRN138-1|mir-138-1	microRNA 138-1	ncRNA	3.76922
chr1	67581454	67581954	intron (NR_075077, intron 4 of 9)	L2a|LINE|L2	18950	NM_001276352	400757	Hs.666621	NM_001013674	ENSG00000203963	C1orf141	-	chromosome 1 open reading frame 141	protein-coding	3.85397
chr14	75354927	75355875	intron (NR_033814, intron 3 of 13)	AluJr|SINE|Alu	6807	NM_001244883	1743	Hs.525459	NM_001933	ENSG00000119689	DLST	DLTS	dihydrolipoamide S-succinyltransferase	protein-coding	2.38868
chr3	50643244	50643744	TTS (NM_145071)	TTS (NM_145071)	5768	NM_013324	1154	Hs.655334	NM_013324	ENSG00000114737	CISH	BACTS2|CIS|CIS-1|G18|SOCS	cytokine inducible SH2 containing protein	protein-coding	3.1501
chr15	88609850	88610350	intron (NM_001007156, intron 13 of 15)	intron (NM_001007156, intron 13 of 15)	139105	NM_001320135	4916	Hs.185701	NM_002530	ENSG00000140538	NTRK3	GP145-TrkC|TRKC|gp145(trkC)	neurotrophic receptor tyrosine kinase 3	protein-coding	3.79458
chr6	43245824	43246722	intron (NM_032538, intron 13 of 14)	MER5B|DNA|hAT-Charlie	-19725	NM_006672	10864	Hs.485438	NM_006672	ENSG00000137204	SLC22A7	NLT|OAT2	solute carrier family 22 member 7	protein-coding	4.40927
chr6	45470150	45470831	intron (NM_001015051, intron 6 of 7)	intron (NM_001015051, intron 6 of 7)	80177	NM_001278478	860	Hs.535845	NM_004348	ENSG00000124813	RUNX2	AML3|CBF-alpha-1|CBFA1|CCD|CCD1|CLCD|OSF-2|OSF2|PEA2aA|PEBP2aA	runt related transcription factor 2	protein-coding	4.38594
chr3	183492337	183492837	intron (NM_018023, intron 17 of 30)	intron (NM_018023, intron 17 of 30)	50806	NM_024871	79929	Hs.478465	NM_024871	ENSG00000180834	MAP6D1	MAPO6D1|SL21	MAP6 domain containing 1	protein-coding	3.08864
chr11	76572526	76573026	intron (NM_001300953, intron 1 of 9)	intron (NM_001300953, intron 1 of 9)	859	NM_001300955	55331	Hs.23862	NM_018367	ENSG00000078124	ACER3	APHC|PHCA	alkaline ceramidase 3	protein-coding	2.98365
chr7	74571985	74572485	TTS (NR_003187)	TTS (NR_003187)	15567	NR_003187	654817	Hs.647047	NR_003187	ENSG00000165178	NCF1C	SH3PXD1C	neutrophil cytosolic factor 1C pseudogene	pseudo	2.43605
chr12	96622902	96623402	intron (NM_005230, intron 2 of 4)	MLT1C|LTR|ERVL-MaLR	-26086	NM_001303511	2004	Hs.46523	NM_005230	ENSG00000111145	ELK3	ERP|NET|SAP-2|SAP2	ELK3, ETS transcription factor	protein-coding	2.78582
chrX	10694618	10695118	intron (NM_033290, intron 1 of 9)	intron (NM_033290, intron 1 of 9)	-49089	NM_001098624	4281	Hs.27695	NM_000381	ENSG00000101871	MID1	BBBG1|FXY|GBBB1|MIDIN|OGS1|OS|OSX|RNF59|TRIM18|XPRF|ZNFXY	midline 1	protein-coding	3.05127
chr10	101861215	101861715	Intergenic	Intergenic	-19823	NM_001308	1369	Hs.2246	NM_001308	ENSG00000120054	CPN1	CPN|SCPN	carboxypeptidase N subunit 1	protein-coding	3.02432
chr20	42159344	42159844	intron (NM_015478, intron 8 of 18)	intron (NM_015478, intron 8 of 18)	16518	NM_015478	26013	Hs.709356	NM_015478	ENSG00000185513	L3MBTL1	H-L(3)MBT|L3MBTL|ZC2HC3|dJ138B7.3	l(3)mbt-like 1 (Drosophila)	protein-coding	3.55157
chr19	6129184	6129684	Intergenic	AluSz|SINE|Alu	-6210	NM_001321384	81616	Hs.465720	NM_030924	ENSG00000130377	ACSBG2	BGR|BRGL|PRTD-NY3|PRTDNY3	acyl-CoA synthetase bubblegum family member 2	protein-coding	4.93278
chr4	74464802	74465302	intron (NM_201431, intron 2 of 10)	intron (NM_201431, intron 2 of 10)	21235	NM_177532	166824	Hs.529677	NM_177532	ENSG00000169435	RASSF6	-	Ras association domain family member 6	protein-coding	3.97991
chr8	134388290	134388790	Intergenic	Intergenic	-78993	NM_006096	10397	Hs.372914	NM_006096	ENSG00000104419	NDRG1	CAP43|CMT4D|DRG-1|DRG1|GC4|HMSNL|NDR1|NMSL|PROXY1|RIT42|RTP|TARG1|TDD5	N-myc downstream regulated 1	protein-coding	3.2608
chr12	1922053	1922553	intron (NM_172364, intron 26 of 37)	MIRc|SINE|MIR	-7130	NM_001163926	654429	Hs.585579	NM_001039029	ENSG00000166159	LRTM2	-	leucine rich repeats and transmembrane domains 2	protein-coding	2.52543
chr10	65471943	65472443	Intergenic	Intergenic	-190358	NM_001322258	221037	Hs.413416	NM_004241	ENSG00000171988	JMJD1C	KDM3C|TRIP-8|TRIP8	jumonji domain containing 1C	protein-coding	3.33777
chr5	2946394	2946894	Intergenic	Intergenic	28676	NR_136207	105374620	Hs.742780	NR_136207		LOC105374620	-	uncharacterized LOC105374620	ncRNA	3.40367
chr3	127139649	127140149	Intergenic	Intergenic	-30386	NR_110147	101927123	Hs.526761	NR_110147	ENSG00000244215	LINC02016	-	long intergenic non-protein coding RNA 2016	ncRNA	3.0032
chr6	160114336	160115089	promoter-TSS (NM_000636)	promoter-TSS (NM_000636)	-353	NM_000636	6648	Hs.487046	NM_000636	ENSG00000112096	SOD2	IPO-B|IPOB|MNSOD|MVCD6|Mn-SOD	superoxide dismutase 2, mitochondrial	protein-coding	2.62253
chr8	22068253	22068753	intron (NM_006129, intron 19 of 19)	intron (NM_006129, intron 19 of 19)	21348	NM_001099335	9796	Hs.334688	NM_014759	ENSG00000168490	PHYHIP	DYRK1AP3|PAHX-AP|PAHXAP1	phytanoyl-CoA 2-hydroxylase interacting protein	protein-coding	2.57325
chr3	108808013	108808513	intron (NM_014429, intron 8 of 27)	intron (NM_014429, intron 8 of 27)	-12040	NR_144461	100506506	Hs.278908	NR_144461		MORC1-AS1	-	MORC1 antisense RNA 1	ncRNA	2.96478
chr17	21190590	21191930	promoter-TSS (NM_002756)	promoter-TSS (NM_002756)	-88	NM_002756	5606	Hs.514012	NM_002756	ENSG00000034152	MAP2K3	MAPKK3|MEK3|MKK3|PRKMK3|SAPKK-2|SAPKK2	mitogen-activated protein kinase kinase 3	protein-coding	3.03932
chr10	64378624	64379124	intron (NM_199452, intron 1 of 6)	intron (NM_199452, intron 1 of 6)	98667	NM_199452	22891	Hs.22653	NM_014951	ENSG00000138311	ZNF365	Su48|UAN|ZNF365D	zinc finger protein 365	protein-coding	4.22203
chr1	18436355	18436855	intron (NM_032880, intron 1 of 9)	CpG	2365	NM_032880	84966	Hs.212511	NM_032880	ENSG00000117154	IGSF21	-	immunoglobin superfamily member 21	protein-coding	2.79719
chr1	245055669	245056169	Intergenic	Intergenic	-28092	NM_031844	3192	Hs.106212	NM_004501	ENSG00000153187	HNRNPU	HNRNPU-AS1|HNRPU|SAF-A|SAFA|U21.1|hnRNP U	heterogeneous nuclear ribonucleoprotein U	protein-coding	3.32838
chr1	32210740	32211240	intron (NM_001294336, intron 4 of 31)	intron (NM_001294336, intron 4 of 31)	13346	NR_036216	100423028		NR_036216	ENSG00000266580	MIR4254	-	microRNA 4254	ncRNA	4.71851
chr8	85700749	85701249	intron (NM_001287243, intron 3 of 7)	intron (NM_001287243, intron 3 of 7)	82837	NM_001287244	138046	Hs.121663	NM_173848	ENSG00000184672	RALYL	HNRPCL3	RALY RNA binding protein-like	protein-coding	4.05158
chr9	90255192	90255692	intron (NM_001288729, intron 8 of 25)	intron (NM_001288729, intron 8 of 25)	-85532	NM_001257973	1514	Hs.731507	NM_001912	ENSG00000135047	CTSL	CATL|CTSL1|MEP	cathepsin L	protein-coding	2.42526
chr11	74467545	74468045	intron (NM_001098638, intron 1 of 5)	L2c|LINE|L2	7882	NM_001098638	254225	Hs.370145	NM_001098638	ENSG00000166439	RNF169	-	ring finger protein 169	protein-coding	4.51222
chr3	122718900	122719400	intron (NR_046079, intron 1 of 22)	intron (NR_046079, intron 1 of 22)	-7030	NM_001256346	54437	Hs.210870	NM_018987	ENSG00000082684	SEMA5B	SEMAG|SemG	semaphorin 5B	protein-coding	5.6739
chr5	150590717	150591217	intron (NM_015621, intron 1 of 8)	MER5A|DNA|hAT-Charlie	12687	NM_015621	26112	Hs.655336	NM_015621	ENSG00000198624	CCDC69	-	coiled-coil domain containing 69	protein-coding	5.26179
chr3	98296071	98296841	Intergenic	MLT1G|LTR|ERVL-MaLR	15999	NM_000097	1371	Hs.476982	NM_000097	ENSG00000080819	CPOX	CPO|CPX|HCP	coproporphyrinogen oxidase	protein-coding	4.5657
chr16	69867779	69868279	intron (NM_007014, intron 5 of 24)	L2a|LINE|L2	-4611	NM_001270453	11060	Hs.408458	NM_007014	ENSG00000198373	WWP2	AIP2|WWp2-like	WW domain containing E3 ubiquitin protein ligase 2	protein-coding	4.08039
chr12	125724895	125725395	Intergenic	Intergenic	-86017	NM_052907	114795	Hs.524838	NM_052907	ENSG00000139364	TMEM132B	-	transmembrane protein 132B	protein-coding	3.36516
chr6	150698207	150698707	intron (NR_134655, intron 1 of 5)	intron (NR_134655, intron 1 of 5)	8429	NM_001318495	389434	Hs.310225	NM_203395	ENSG00000009765	IYD	C6orf71|DEHAL1|IYD-1|TDH4	iodotyrosine deiodinase	protein-coding	3.54709
chr2	26679396	26679896	TTS (NM_004802)	TTS (NM_004802)	21264	NM_194322	9381	Hs.91608	NM_004802	ENSG00000115155	OTOF	AUNB1|DFNB6|DFNB9|FER1L2|NSRD9	otoferlin	protein-coding	3.34567
chr5	153457240	153457740	Intergenic	Intergenic	38971	NM_001135037	4238	Hs.432818	NM_005927	ENSG00000037749	MFAP3	-	microfibrillar associated protein 3	protein-coding	5.36926
chr1	226073894	226074394	3' UTR (NM_020997, exon 4 of 4)	3' UTR (NM_020997, exon 4 of 4)	2702	NM_020997	10637	Hs.656214	NM_020997	ENSG00000243709	LEFTY1	LEFTB|LEFTYB	left-right determination factor 1	protein-coding	4.43888
chr11	46076899	46077399	intron (NM_016621, intron 5 of 17)	intron (NM_016621, intron 5 of 17)	65836	NM_001101802	51317	Hs.502458	NM_016621	ENSG00000135365	PHF21A	BHC80|BM-006	PHD finger protein 21A	protein-coding	2.65914
chr8	82470031	82470708	Intergenic	Intergenic	-26745	NM_001105281	646486	Hs.586370	NM_001105281	ENSG00000197416	FABP12	-	fatty acid binding protein 12	protein-coding	2.84613
chr17	42209752	42210252	Intergenic	Intergenic	-8988	NM_005474	10014	Hs.438782	NM_005474	ENSG00000108840	HDAC5	HD5|NY-CO-9	histone deacetylase 5	protein-coding	5.06639
chr6	41546536	41547036	intron (NM_001012426, intron 3 of 16)	intron (NM_001012426, intron 3 of 16)	-19675	NR_039784	100616178		NR_039784	ENSG00000266494	MIR4641	-	microRNA 4641	ncRNA	2.97621
chr9	110331432	110331932	Intergenic	Intergenic	-79681	NM_004235	9314	Hs.376206	NM_004235	ENSG00000136826	KLF4	EZF|GKLF	Kruppel like factor 4	protein-coding	3.32457
chr14	105215527	105216027	Intergenic	MER54A|LTR|ERVL	-3693	NM_006427	10572	Hs.112058	NM_006427	ENSG00000184990	SIVA1	CD27BP|SIVA|Siva-1|Siva-2	SIVA1 apoptosis inducing factor	protein-coding	3.43511
chr22	37214392	37214892	intron (NM_002854, intron 1 of 4)	intron (NM_002854, intron 1 of 4)	875	NM_002854	5816	Hs.295449	NM_002854	ENSG00000100362	PVALB	D22S749	parvalbumin	protein-coding	3.7816
chr4	144146253	144146753	Intergenic	L2c|LINE|L2	40433	NM_032557	84640	Hs.480848	NM_032557	ENSG00000170185	USP38	HP43.8KD	ubiquitin specific peptidase 38	protein-coding	inf
chr16	56279853	56280589	TTS (NR_037499)	TTS (NR_037499)	789	NR_037499	100500891		NR_037499	ENSG00000265281	MIR3935	-	microRNA 3935	ncRNA	2.72011
chr15	51967394	51967894	Intergenic	Intergenic	-5906	NM_013243	29106	Hs.232618	NM_013243	ENSG00000104112	SCG3	SGIII	secretogranin III	protein-coding	5.74278
chr2	218868663	218869163	Intergenic	Intergenic	25483	NR_135524	105373878	Hs.630709	NR_135524	ENSG00000223923	LOC105373878	-	uncharacterized LOC105373878	ncRNA	4.83258
chr19	18451641	18452141	intron (NM_001329477, intron 1 of 3)	intron (NM_001329477, intron 1 of 3)	494	NM_001329477	54858	Hs.131776	NM_017712	ENSG00000130517	PGPEP1	PAP-I|PGI|PGP|PGP-I|PGPI|Pcp	pyroglutamyl-peptidase I	protein-coding	3.31416
chr17	29826912	29827412	intron (NM_001346748, intron 1 of 12)	intron (NM_001346748, intron 1 of 12)	12143	NM_001346747	84440	Hs.406788	NM_032932	ENSG00000131242	RAB11FIP4	FIP4-Rab11|RAB11-FIP4	RAB11 family interacting protein 4	protein-coding	4.54809
chrY	15590711	15591663	exon (NM_001258264, exon 2 of 29)	exon (NM_001258264, exon 2 of 29)	1363	NR_047599	7404	Hs.115277	NM_007125	ENSG00000183878	UTY	KDM6AL|KDM6C|UTY1	ubiquitously transcribed tetratricopeptide repeat containing, Y-linked	protein-coding	3.04905
chr1	156521576	156522076	exon (NM_178229, exon 14 of 38)	exon (NM_178229, exon 14 of 38)	20570	NM_178229	128239	Hs.591495	NM_178229	ENSG00000183856	IQGAP3	-	IQ motif containing GTPase activating protein 3	protein-coding	2.63761
chr4	77309282	77310051	intron (NM_001042784, intron 3 of 23)	L1MA2|LINE|L1	18791	NM_001042784	339965	Hs.529680	NM_178555	ENSG00000163749	CCDC158	-	coiled-coil domain containing 158	protein-coding	4.64109
chr11	47628797	47629297	Intergenic	MLT1K|LTR|ERVL-MaLR	-13086	NM_031909	114900	Hs.662633	NM_031909	ENSG00000172247	C1QTNF4	CTRP4|ZACRP4	C1q and tumor necrosis factor related protein 4	protein-coding	3.35354
chr3	123976775	123977275	intron (NM_001024660, intron 3 of 59)	intron (NM_001024660, intron 3 of 59)	-116154	NR_106731	102464832		NR_106731	ENSG00000276656	MIR6083	hsa-mir-6083	microRNA 6083	ncRNA	3.88411
chr20	49294656	49295370	intron (NM_001290268, intron 1 of 21)	intron (NM_001290268, intron 1 of 21)	13054	NR_110890	140876	Hs.372578	NM_080829	ENSG00000042062	FAM65C	C20orf175|C20orf176	family with sequence similarity 65 member C	protein-coding	2.90811
chr6	111409456	111409956	intron (NM_018593, intron 1 of 5)	intron (NM_018593, intron 1 of 5)	925	NM_018593	117247	Hs.591327	NM_018593	ENSG00000112394	SLC16A10	MCT10|PRO0813|TAT1	solute carrier family 16 member 10	protein-coding	3.26042
chr5	71774402	71775207	intron (NM_152625, intron 1 of 4)	intron (NM_152625, intron 1 of 4)	28444	NM_152625	167465	Hs.224794	NM_152625	ENSG00000178175	ZNF366	DCSCRIPT	zinc finger protein 366	protein-coding	inf
chr2	178189927	178190609	intron (NR_026966, intron 5 of 8)	L2c|LINE|L2	-11658	NR_106767	102465255		NR_106767	ENSG00000278418	MIR6512	hsa-mir-6512|mir-6512	microRNA 6512	ncRNA	2.94488
chr19	14017273	14017773	promoter-TSS (NM_001345843)	promoter-TSS (NM_001345843)	-545	NM_001345844	79173	Hs.143288	NM_024323	ENSG00000132016	C19orf57	-	chromosome 19 open reading frame 57	protein-coding	3.99735
chr7	16524408	16524908	Intergenic	LTR16E2|LTR|ERVL	-19184	NM_015464	25928	Hs.648106	NM_015464	ENSG00000171243	SOSTDC1	CDA019|DAND7|ECTODIN|USAG1	sclerostin domain containing 1	protein-coding	3.17328
chrX	11479644	11480144	intron (NR_109776, intron 1 of 14)	intron (NR_109776, intron 1 of 14)	-33989	NM_001287242	395	Hs.435291	NM_001174	ENSG00000047648	ARHGAP6	RHOGAP6|RHOGAPX-1	Rho GTPase activating protein 6	protein-coding	2.37107
chr20	44979193	44979693	exon (NM_001281457, exon 9 of 10)	exon (NM_001281457, exon 9 of 10)	13654	NM_015945	51006	Hs.593344	NM_015945	ENSG00000080189	SLC35C2	BA394O2.1|C20orf5|CGI-15|OVCOV1	solute carrier family 35 member C2	protein-coding	2.93531
chr3	52560856	52561356	intron (NM_022908, intron 10 of 13)	MIR|SINE|MIR	6687	NM_001134231	64943	Hs.84753	NM_022908	ENSG00000168268	NT5DC2	-	5'-nucleotidase domain containing 2	protein-coding	3.15439
chr3	147929422	147929922	Intergenic	Intergenic	133726	NR_134937	100507461	Hs.112623	NR_134937	ENSG00000241131	LINC02032	-	long intergenic non-protein coding RNA 2032	ncRNA	3.96375
chr8	101485990	101486755	Intergenic	Intergenic	85566	NM_001270378	157567	Hs.530199	NM_198401	ENSG00000186106	ANKRD46	ANK-S|GENX-115279	ankyrin repeat domain 46	protein-coding	4.28842
chr6	51930354	51930854	intron (NM_170724, intron 12 of 60)	intron (NM_170724, intron 12 of 60)	21819	NM_170724	5314	Hs.662050	NM_138694	ENSG00000170927	PKHD1	ARPKD|FCYT|TIGM1	polycystic kidney and hepatic disease 1 (autosomal recessive)	protein-coding	2.61179
chr15	73263622	73264122	Intergenic	Intergenic	-80953	NM_002499	4756	Hs.388613	NM_002499	ENSG00000067141	NEO1	IGDCC2|NGN|NTN1R2	neogenin 1	protein-coding	3.3814
chr14	99844940	99845645	Intergenic	Intergenic	101933	NM_032233	84193	Hs.510407	NM_032233	ENSG00000183576	SETD3	C14orf154	SET domain containing 3	protein-coding	4.40135
chr2	96769916	96770416	Intergenic	Intergenic	11818	NM_000682	151	Hs.247686	NM_000682	ENSG00000274286	ADRA2B	ADRA2L1|ADRA2RL1|ADRARL1|ALPHA2BAR|FAME2|alpha-2BAR	adrenoceptor alpha 2B	protein-coding	4.02491
chr16	4418891	4419594	intron (NR_145128, intron 9 of 27)	intron (NR_145128, intron 9 of 27)	-2606	NM_138440	114990	Hs.372579	NM_138440	ENSG00000168140	VASN	SLITL2	vasorin	protein-coding	2.67439
chr2	31304806	31305306	intron (NM_001329095, intron 1 of 15)	intron (NM_001329095, intron 1 of 15)	47450	NM_001253827	79623	Hs.468058	NM_024572	ENSG00000158089	GALNT14	GALNT15|GalNac-T10|GalNac-T14	polypeptide N-acetylgalactosaminyltransferase 14	protein-coding	3.47268
chr12	127754612	127755112	Intergenic	Intergenic	69755	NR_110057	101927616	Hs.637827	NR_110057	ENSG00000256362	LOC101927616	-	uncharacterized LOC101927616	ncRNA	2.60032
chr20	57854335	57854835	Intergenic	Intergenic	-20897	NM_001302455	1908	Hs.1408	NM_000114	ENSG00000124205	EDN3	ET-3|ET3|HSCR4|PPET3|WS4B	endothelin 3	protein-coding	3.73599
chr6	41340472	41340972	Intergenic	CpG	37194	NM_001199510	9436	Hs.194721	NM_004828	ENSG00000096264	NCR2	CD336|LY95|NK-p44|NKP44|dJ149M18.1	natural cytotoxicity triggering receptor 2	protein-coding	4.43435
chr20	49020014	49020827	Intergenic	Intergenic	-82542	NR_109950	101927586	Hs.637665	NR_109950	ENSG00000233077	LINC01271	-	long intergenic non-protein coding RNA 1271	ncRNA	3.93306
chr12	57230013	57230513	Intergenic	MER50-int|LTR|ERV1	73261	NM_003725	8630	Hs.524513	NM_003725	ENSG00000025423	HSD17B6	HSE|RODH|SDR9C6	hydroxysteroid 17-beta dehydrogenase 6	protein-coding	2.92893
chr6	34216244	34217117	5' UTR (NM_001287396, exon 1 of 5)	5' UTR (NM_001287396, exon 1 of 5)	204	NM_001008703	221491	Hs.381300	NM_178508	ENSG00000186577	C6orf1	LBH	chromosome 6 open reading frame 1	protein-coding	2.98502
chr1	56840170	56840821	Intergenic	Intergenic	204761	NM_003713	8613	Hs.405156	NM_003713	ENSG00000162407	PLPP3	Dri42|LPP3|PAP2B|PPAP2B|VCIP	phospholipid phosphatase 3	protein-coding	3.27738
chr6	106546462	106546962	promoter-TSS (NM_182907)	promoter-TSS (NM_182907)	-25	NM_182907	639	Hs.436023	NM_001198	ENSG00000057657	PRDM1	BLIMP1|PRDI-BF1	PR/SET domain 1	protein-coding	2.37609
chr17	76744745	76745245	intron (NM_004762, intron 1 of 12)	intron (NM_004762, intron 1 of 12)	-25163	NM_001292018	9267	Hs.191215	NM_004762	ENSG00000108669	CYTH1	B2-1|CYTOHESIN-1|D17S811E|PSCD1|SEC7	cytohesin 1	protein-coding	2.48864
chr2	120124967	120125467	promoter-TSS (NM_001322331)	promoter-TSS (NM_001322331)	-34	NM_001079863	1622	Hs.78888	NM_020548	ENSG00000155368	DBI	ACBD1|ACBP|CCK-RP|EP	diazepam binding inhibitor, acyl-CoA binding protein	protein-coding	2.46714
chr5	180312831	180313331	Intergenic	L1PA6|LINE|L1	-12996	NM_001159709	79908	Hs.189109	NM_024850	ENSG00000113303	BTNL8	BTN9.2	butyrophilin like 8	protein-coding	3.3048
chr1	17852713	17853213	Intergenic	MIRb|SINE|MIR	-13367	NR_137287	55160	Hs.443460	NM_018125	ENSG00000074964	ARHGEF10L	GrinchGEF	Rho guanine nucleotide exchange factor 10 like	protein-coding	3.53017
chr16	90089381	90089881	intron (NM_001481, intron 1 of 10)	intron (NM_001481, intron 1 of 10)	623	NM_001286205	2622	Hs.431792	NM_001481	ENSG00000141013	GAS8	CILD33|DRC4|GAS11	growth arrest specific 8	protein-coding	2.63064
chr1	42631240	42631905	Intergenic	Intergenic	-1178	NM_033553	2980	Hs.778	NM_033553	ENSG00000197273	GUCA2A	GCAP-I|GUCA2|STARA	guanylate cyclase activator 2A	protein-coding	2.91468
chr2	61897582	61898082	Intergenic	Intergenic	-132414	NM_003400	7514	Hs.370770	NM_003400	ENSG00000082898	XPO1	CRM1|emb|exp1	exportin 1	protein-coding	3.23582
chr15	77951200	77951700	promoter-TSS (NR_120361)	promoter-TSS (NR_120361)	-943	NR_120362	101929478	Hs.569510	NR_120361	ENSG00000259281	LINGO1-AS2	-	LINGO1 antisense RNA 2	ncRNA	5.13636
chr21	43368163	43368663	promoter-TSS (NR_132773)	promoter-TSS (NR_132773)	-22	NR_132773	106635524		NR_132773		SNORA91	-	small nucleolar RNA, H/ACA box 91	snoRNA	3.20503
chr17	48189280	48189780	TTS (NM_001199898)	TTS (NM_001199898)	16471	NM_001199899	5164	Hs.256667	NM_002611	ENSG00000005882	PDK2	PDHK2|PDKII	pyruvate dehydrogenase kinase 2	protein-coding	4.06712
chr15	58750230	58750730	intron (NR_120338, intron 2 of 2)	intron (NR_120338, intron 2 of 2)	26305	NM_000236	3990	Hs.654472	NM_000236	ENSG00000166035	LIPC	HDLCQ12|HL|HTGL|LIPH	lipase C, hepatic type	protein-coding	3.5341
chr8	123580730	123581230	promoter-TSS (NR_131202)	promoter-TSS (NR_131202)	-97	NR_131202	105375734	Hs.628341	NR_131202		LOC105375734	-	uncharacterized LOC105375734	ncRNA	3.42089
chr1	197744505	197745249	promoter-TSS (NM_001195215)	promoter-TSS (NM_001195215)	-254	NR_125340	163486	Hs.125056	NM_019049	ENSG00000213047	DENND1B	C1ORF18|C1orf218|FAM31B	DENN domain containing 1B	protein-coding	3.4692
chr3	148933796	148934482	intron (NR_046371, intron 1 of 17)	MLT1E3|LTR|ERVL-MaLR	5693	NM_000096	1356	Hs.558314	NM_000096	ENSG00000047457	CP	CP-2	ceruloplasmin	protein-coding	4.00934
chr3	50570064	50570564	Intergenic	Intergenic	-28639	NM_001291101	9254	Hs.476273	NM_006030	ENSG00000007402	CACNA2D2	CACNA2D	calcium voltage-gated channel auxiliary subunit alpha2delta 2	protein-coding	4.13683
chr10	102045706	102046939	promoter-TSS (NM_001282438)	promoter-TSS (NM_001282438)	146	NM_001282436	282991	Hs.34906	NM_173809	ENSG00000196072	BLOC1S2	BLOS2|BORCS2|CEAP|CEAP11	biogenesis of lysosomal organelles complex 1 subunit 2	protein-coding	2.36277
chr3	72641248	72641748	Intergenic	L2c|LINE|L2	71902	NR_135531	105377162	Hs.123457	NR_135531		LOC105377162	-	uncharacterized LOC105377162	ncRNA	5.08193
chr16	84208841	84209554	intron (NM_178452, intron 10 of 11)	intron (NM_178452, intron 10 of 11)	11478	NM_139353	9013	Hs.153022	NM_005679	ENSG00000103168	TAF1C	MGC:39976|SL1|TAFI110|TAFI95	TATA-box binding protein associated factor, RNA polymerase I subunit C	protein-coding	4.5534
chr2	47290559	47291059	intron (NM_020458, intron 19 of 19)	intron (NM_020458, intron 19 of 19)	91708	NM_173649	285051	Hs.531575	NM_173649	ENSG00000239605	C2orf61	-	chromosome 2 open reading frame 61	protein-coding	4.96587
chr12	31061667	31062167	Intergenic	Intergenic	-17921	NM_001080509	441631	Hs.505141	NM_001080509	ENSG00000110900	TSPAN11	VSSW1971	tetraspanin 11	protein-coding	3.69122
chr7	45921562	45922062	Intergenic	Intergenic	-6147	NM_000596	3484	Hs.642938	NM_000596	ENSG00000146678	IGFBP1	AFBP|IBP1|IGF-BP25|PP12|hIGFBP-1	insulin like growth factor binding protein 1	protein-coding	2.69569
chr10	11575260	11575760	intron (NM_014688, intron 2 of 14)	MLT1D|LTR|ERVL-MaLR	-1231	NM_001080491	9712	Hs.498661	NM_014688	ENSG00000148429	USP6NL	RNTRE|TRE2NL|USP6NL-IT1	USP6 N-terminal like	protein-coding	4.96829
chr17	37796598	37797098	intron (NM_001165937, intron 1 of 14)	intron (NM_001165937, intron 1 of 14)	3515	NM_006804	10948	Hs.728838	NM_006804	ENSG00000131748	STARD3	CAB1|MLN64|es64	StAR related lipid transfer domain containing 3	protein-coding	4.44194
chr18	48499647	48500147	intron (NM_018696, intron 1 of 3)	intron (NM_018696, intron 1 of 3)	5510	NM_018696	55520	Hs.657360	NM_018696	ENSG00000141642	ELAC1	D29	elaC ribonuclease Z 1	protein-coding	2.4114
chr18	21002800	21003300	intron (NR_134877, intron 2 of 13)	intron (NR_134877, intron 2 of 13)	14883	NM_032933	85019	Hs.137562	NM_032933	ENSG00000134490	TMEM241	C18orf45|hVVT	transmembrane protein 241	protein-coding	4.51275
chr5	169606716	169607216	Intergenic	Intergenic	19179	NR_108022	100507267	Hs.634846	NR_108022		LINC01187	CTB-27N1.1|KIDR	long intergenic non-protein coding RNA 1187	ncRNA	4.55834
chr10	88199253	88199753	intron (NM_015045, intron 17 of 18)	intron (NM_015045, intron 17 of 18)	-73253	NM_017551	2894	Hs.530653	NM_017551	ENSG00000182771	GRID1	GluD1	glutamate ionotropic receptor delta type subunit 1	protein-coding	3.37957
chr17	17598356	17598856	intron (NM_030665, intron 1 of 5)	intron (NM_030665, intron 1 of 5)	13819	NM_030665	10743	Hs.655395	NM_030665	ENSG00000108557	RAI1	SMCR|SMS	retinoic acid induced 1	protein-coding	2.72268
chr20	5137363	5137863	intron (NM_003818, intron 1 of 12)	MLT1K|LTR|ERVL-MaLR	30206	NM_003818	8760	Hs.126857	NM_003818	ENSG00000101290	CDS2	-	CDP-diacylglycerol synthase 2	protein-coding	3.60155
chr5	149640669	149641169	intron (NM_171825, intron 3 of 17)	intron (NM_171825, intron 3 of 17)	28484	NM_015981	815	Hs.743976	NM_015981	ENSG00000070808	CAMK2A	CAMKA	calcium/calmodulin dependent protein kinase II alpha	protein-coding	3.51404
chr12	122298144	122298644	intron (NM_001171993, intron 2 of 15)	intron (NM_001171993, intron 2 of 15)	-1625	NM_002150	3242	Hs.2899	NM_002150	ENSG00000158104	HPD	4-HPPD|4HPPD|GLOD3|HPPDASE|PPD	4-hydroxyphenylpyruvate dioxygenase	protein-coding	6.7174
chr19	39891985	39892485	TTS (NM_001317770)	TTS (NM_001317770)	-5252	NM_003407	7538	Hs.534052	NM_003407	ENSG00000128016	ZFP36	G0S24|GOS24|NUP475|RNF162A|TIS11|TTP|zfp-36	ZFP36 ring finger protein	protein-coding	3.03587
chr17	74242558	74243058	Intergenic	Intergenic	-6416	NM_001330501	114804	Hs.500643	NM_052916	ENSG00000141576	RNF157	-	ring finger protein 157	protein-coding	4.62803
chr15	56029455	56029955	intron (NM_173814, intron 2 of 19)	intron (NM_173814, intron 2 of 19)	5612	NM_173814	283659	Hs.130957	NM_173814	ENSG00000166450	PRTG	IGDCC5	protogenin	protein-coding	3.10763
chr2	42237984	42238484	Intergenic	Intergenic	-36927	NM_138370	91461	Hs.408542	NM_138370	ENSG00000162878	PKDCC	SGK493|Vlk	protein kinase domain containing, cytoplasmic	protein-coding	4.24528
chr5	14037405	14037905	Intergenic	Intergenic	-93066	NM_001369	1767	Hs.212360	NM_001369	ENSG00000039139	DNAH5	CILD3|DNAHC5|HL1|KTGNR|PCD	dynein axonemal heavy chain 5	protein-coding	2.4383
chr12	96278742	96279242	intron (NM_182496, intron 10 of 15)	intron (NM_182496, intron 10 of 15)	26283	NM_003095	6636	Hs.105465	NM_003095	ENSG00000139343	SNRPF	SMF|Sm-F|snRNP-F	small nuclear ribonucleoprotein polypeptide F	protein-coding	3.80116
chrX	151596516	151597016	intron (NM_000808, intron 1 of 9)	intron (NM_000808, intron 1 of 9)	23065	NM_000808	2556	Hs.123024	NM_000808	ENSG00000011677	GABRA3	-	gamma-aminobutyric acid type A receptor alpha3 subunit	protein-coding	2.75738
chr12	110274678	110275178	Intergenic	Intergenic	-3716	NM_021625	59341	Hs.506713	NM_021625	ENSG00000111199	TRPV4	BCYM3|CMT2C|HMSN2C|OTRPC4|SMAL|SPSMA|SSQTL1|TRP12|VRL2|VROAC	transient receptor potential cation channel subfamily V member 4	protein-coding	3.01874
chr5	132803787	132804287	intron (NM_015082, intron 3 of 15)	intron (NM_015082, intron 3 of 15)	-40639	NR_031621	100302134		NR_031621	ENSG00000221287	MIR1289-2	MIRN1289-2|hsa-mir-1289-2	microRNA 1289-2	ncRNA	3.96394
chr1	213743162	213743662	Intergenic	Intergenic	-354680	NR_046189	100861504	Hs.742586	NR_046189		LINC00538	PROX1UT|Yiya	long intergenic non-protein coding RNA 538	ncRNA	inf
chr5	176731246	176731998	promoter-TSS (NM_001031677)	promoter-TSS (NM_001031677)	859	NM_013237	27166	Hs.744904	NM_013237	ENSG00000169230	PRELID1	CGI-106|PRELI|PX19|SBBI12	PRELI domain containing 1	protein-coding	2.86777
chr1	154325899	154326399	Intergenic	L2|LINE|L2	25873	NM_020452	57198	Hs.435700	NM_020452	ENSG00000143515	ATP8B2	ATPID	ATPase phospholipid transporting 8B2	protein-coding	2.3963
chrX	24888167	24888667	intron (NM_016937, intron 34 of 36)	intron (NM_016937, intron 34 of 36)	125859	NR_003007	677773	Hs.689695	NR_003007	ENSG00000251869	SCARNA23	ACA12	small Cajal body-specific RNA 23	ncRNA	3.40222
chr14	69972320	69972820	intron (NM_001161498, intron 6 of 12)	intron (NM_001161498, intron 6 of 12)	21099	NM_001161498	400224	Hs.509796	NM_001161498	ENSG00000175985	PLEKHD1	UPF0639	pleckstrin homology and coiled-coil domain containing D1	protein-coding	3.47558
chr7	26193020	26193520	intron (NM_004289, intron 1 of 3)	intron (NM_004289, intron 1 of 3)	1423	NM_004289	9603	Hs.404741	NM_004289	ENSG00000050344	NFE2L3	NRF3	nuclear factor, erythroid 2 like 3	protein-coding	3.57984
chr3	9711661	9712161	intron (NM_001077525, intron 5 of 18)	intron (NM_001077525, intron 5 of 18)	20794	NM_022485	64419	Hs.475382	NM_022485	ENSG00000163719	MTMR14	C3orf29	myotubularin related protein 14	protein-coding	3.60327
chr1	25343790	25344290	Intergenic	Intergenic	-5954	NR_039623	100616365		NR_039623	ENSG00000264371	MIR4425	-	microRNA 4425	ncRNA	2.35788
chr16	75121044	75121544	intron (NM_032268, intron 1 of 4)	intron (NM_032268, intron 1 of 4)	29376	NM_153486	197257	Hs.380929	NM_153486	ENSG00000166816	LDHD	DLD	lactate dehydrogenase D	protein-coding	4.85562
chr4	159927235	159927735	intron (NM_152543, intron 1 of 4)	intron (NM_152543, intron 1 of 4)	28848	NM_152543	152940	Hs.415576	NM_152543	ENSG00000164123	C4orf45	-	chromosome 4 open reading frame 45	protein-coding	2.40305
chr15	75943764	75944264	intron (NM_001318146, intron 2 of 2)	intron (NM_001318146, intron 2 of 2)	2666	NM_001318146	257364	Hs.8705	NM_153271	ENSG00000173548	SNX33	SH3PX3|SH3PXD3C|SNX30	sorting nexin 33	protein-coding	3.00563
chrX	3263229	3264007	intron (NM_015419, intron 1 of 6)	CpG	1066	NM_015419	25878	Hs.369422	NM_015419	ENSG00000101825	MXRA5	-	matrix remodeling associated 5	protein-coding	3.32422
chr2	48757274	48758121	intron (NM_006873, intron 1 of 3)	CpG	390	NM_006873	11037	Hs.44385	NM_006873	ENSG00000243244	STON1	SALF|SBLF|STN1|STNB1	stonin 1	protein-coding	3.44062
chr9	136579963	136581237	intron (NM_001134707, intron 8 of 20)	intron (NM_001134707, intron 8 of 20)	22879	NM_001134707	1757	Hs.198003	NM_007101	ENSG00000123453	SARDH	BPR-2|DMGDHL1|SAR|SARD|SDH	sarcosine dehydrogenase	protein-coding	2.33886
chr10	115404188	115404688	intron (NM_198060, intron 11 of 41)	intron (NM_198060, intron 11 of 41)	19391	NM_001322945	4892	Hs.268788	NM_006175	ENSG00000197893	NRAP	N-RAP	nebulin related anchoring protein	protein-coding	3.15455
chr6	156938376	156938876	Intergenic	Intergenic	-160363	NM_001346813	57492	Hs.291587	NM_017519	ENSG00000049618	ARID1B	6A3-5|BAF250B|BRIGHT|CSS1|DAN15|ELD/OSA1|MRD12|OSA2|P250R	AT-rich interaction domain 1B	protein-coding	4.11473
chr10	113007518	113008018	Intergenic	Intergenic	170978	NM_000681	150	Hs.249159	NM_000681	ENSG00000150594	ADRA2A	ADRA2|ADRA2R|ADRAR|ALPHA2AAR|ZNF32	adrenoceptor alpha 2A	protein-coding	3.16606
chr3	58200049	58200945	Intergenic	Intergenic	-3767	NM_001256560	1776	Hs.476453	NM_004944	ENSG00000163687	DNASE1L3	DHP2|DNAS1L3|LSD|SLEB16	deoxyribonuclease 1 like 3	protein-coding	3.51866
chr6	26257271	26258014	Intergenic	LTR22A|LTR|ERVK	5764	NM_003524	8345	Hs.247815	NM_003524	ENSG00000275713	HIST1H2BH	H2B/j|H2BFJ	histone cluster 1 H2B family member h	protein-coding	4.33681
chr20	59692647	59693147	Intergenic	Intergenic	38777	NR_109919	100506470	Hs.125674	NR_109919	ENSG00000229606	LINC01718	-	long intergenic non-protein coding RNA 1718	ncRNA	2.72276
chr13	48253429	48253929	Intergenic	L2c|LINE|L2	253078	NR_047492	100861549	Hs.660978	NR_047492	ENSG00000260388	LINC00562	-	long intergenic non-protein coding RNA 562	ncRNA	2.83266
chr15	77996644	77997372	intron (NM_001301192, intron 2 of 4)	intron (NM_001301192, intron 2 of 4)	2841	NM_001301198	84894	Hs.656765	NM_032808	ENSG00000169783	LINGO1	LERN1|LRRN6A|UNQ201	leucine rich repeat and Ig domain containing 1	protein-coding	5.76265
chr5	71748236	71748907	intron (NM_152625, intron 3 of 4)	intron (NM_152625, intron 3 of 4)	54677	NM_152625	167465	Hs.224794	NM_152625	ENSG00000178175	ZNF366	DCSCRIPT	zinc finger protein 366	protein-coding	2.33036
chrX	11455642	11456142	intron (NR_109776, intron 1 of 14)	LTR16A2|LTR|ERVL	-9987	NM_001287242	395	Hs.435291	NM_001174	ENSG00000047648	ARHGAP6	RHOGAP6|RHOGAPX-1	Rho GTPase activating protein 6	protein-coding	2.54793
chr10	102666895	102667395	Intergenic	MIR|SINE|MIR	-5181	NM_001136123	55719	Hs.447458	NM_018121	ENSG00000119906	SLF2	C10orf6|FAM178A	SMC5-SMC6 complex localization factor 2	protein-coding	3.57124
chr11	44309253	44309753	intron (NM_021926, intron 1 of 3)	L1MC4|LINE|L1	22213	NM_021926	60529	Hs.436055	NM_021926	ENSG00000052850	ALX4	CRS5|FND2	ALX homeobox 4	protein-coding	3.86116
chr16	85392752	85393252	Intergenic	Intergenic	-53071	NR_049816	100847022		NR_049816	ENSG00000266307	MIR5093	-	microRNA 5093	ncRNA	2.58519
chr1	19212480	19213216	intron (NM_001319218, intron 4 of 13)	intron (NM_001319218, intron 4 of 13)	-3079	NR_039844	100616120		NR_039844	ENSG00000265606	MIR4695	-	microRNA 4695	ncRNA	3.0377
chr11	63546269	63546769	Intergenic	MLT1L|LTR|ERVL-MaLR	-10406	NM_001144936	65998	Hs.191073	NM_001144936	ENSG00000188070	C11orf95	-	chromosome 11 open reading frame 95	protein-coding	3.32897
chr15	73294838	73295338	Intergenic	Intergenic	-49737	NM_002499	4756	Hs.388613	NM_002499	ENSG00000067141	NEO1	IGDCC2|NGN|NTN1R2	neogenin 1	protein-coding	3.46262
chr14	78917236	78917736	intron (NM_004796, intron 1 of 16)	intron (NM_004796, intron 1 of 16)	47412	NM_004796	9369	Hs.368307	NM_004796	ENSG00000021645	NRXN3	C14orf60	neurexin 3	protein-coding	4.42761
chr8	102039226	102040015	Intergenic	Intergenic	-24661	NR_033962	441374	Hs.652045	NR_033962	ENSG00000248599	FLJ42969	-	uncharacterized LOC441374	ncRNA	2.56639
chr17	26188939	26189439	Intergenic	Intergenic	31220	NM_001076680	201229	Hs.687951	NM_001076680	ENSG00000232859	LYRM9	C17orf108|HSD24	LYR motif containing 9	protein-coding	3.07511
chr4	187686776	187687508	Intergenic	Intergenic	-42155	NM_005245	2195	Hs.481371	NM_005245	ENSG00000083857	FAT1	CDHF7|CDHR8|FAT|ME5|hFat1	FAT atypical cadherin 1	protein-coding	2.35238
chr17	14996053	14996553	Intergenic	MER63A|DNA|hAT-Blackjack	13201	NR_103559	94151	Hs.98684	NR_103559		CDRT8	-	CMT1A duplicated region transcript 8	ncRNA	3.01906
chr10	122162469	122163134	Intergenic	Intergenic	-53664	NR_134516	196051	Hs.40479	NM_001030059	ENSG00000203805	PLPP4	DPPL2|PPAPDC1|PPAPDC1A	phospholipid phosphatase 4	protein-coding	3.91893
chr15	76869144	76869644	intron (NM_001145923, intron 22 of 31)	L1MA3|LINE|L1	-9594	NR_037464	100500855		NR_037464	ENSG00000266449	MIR3713	-	microRNA 3713	ncRNA	3.04836
chr1	179763781	179764281	intron (NM_001329719, intron 1 of 4)	MIRb|SINE|MIR	51733	NM_001329719	148753	Hs.400696	NM_173509	ENSG00000143340	FAM163A	C1orf76|NDSP	family with sequence similarity 163 member A	protein-coding	4.25237
chr3	194493904	194494867	intron (NR_037891, intron 3 of 3)	L2b|LINE|L2	65236	NR_037891	100507391	Hs.590099	NR_037891	ENSG00000237222	LINC01968	-	long intergenic non-protein coding RNA 1968	ncRNA	4.96502
chrX	108983166	108983666	Intergenic	Intergenic	-6784	NM_001318509	2182	Hs.268785	NM_004458	ENSG00000068366	ACSL4	ACS4|FACL4|LACS4|MRX63|MRX68	acyl-CoA synthetase long-chain family member 4	protein-coding	3.37046
chr15	91367311	91367811	Intergenic	LTR22A|LTR|ERVK	-44261	NM_002569	5045	Hs.513153	NM_002569	ENSG00000140564	FURIN	FUR|PACE|PCSK3|SPC1	furin, paired basic amino acid cleaving enzyme	protein-coding	4.72532
chr11	128539318	128539818	Intergenic	Intergenic	-16862	NM_001271012	2313	Hs.504281	NM_002017	ENSG00000151702	FLI1	EWSR2|SIC-1	Fli-1 proto-oncogene, ETS transcription factor	protein-coding	2.7609
chr21	33814875	33815672	intron (NM_001320744, intron 1 of 5)	(GGGA)n|Simple_repeat|Simple_repeat	30529	NR_104472	59271	Hs.208358	NM_058187	ENSG00000166979	EVA1C	B18|B19|C21orf63|C21orf64|FAM176C|PRED34|SUE21	eva-1 homolog C	protein-coding	2.81328
chr12	6198078	6198578	intron (NM_000552, intron 6 of 51)	intron (NM_000552, intron 6 of 51)	35513	NM_000552	7450	Hs.440848	NM_000552	ENSG00000110799	VWF	F8VWF|VWD	von Willebrand factor	protein-coding	3.60075
chr20	57874878	57875378	promoter-TSS (NM_001302456)	promoter-TSS (NM_001302456)	-354	NM_001302455	1908	Hs.1408	NM_000114	ENSG00000124205	EDN3	ET-3|ET3|HSCR4|PPET3|WS4B	endothelin 3	protein-coding	4.1827
chr20	48990119	48990907	Intergenic	L2a|LINE|L2	-52634	NR_109950	101927586	Hs.637665	NR_109950	ENSG00000233077	LINC01271	-	long intergenic non-protein coding RNA 1271	ncRNA	3.63512
chr12	123402128	123402628	Intergenic	Intergenic	-21666	NM_024667	79720	Hs.507162	NM_024667	ENSG00000139722	VPS37B	-	VPS37B, ESCRT-I subunit	protein-coding	2.86856
chr12	113344453	113344953	5' UTR (NM_002534, exon 1 of 5)	5' UTR (NM_002534, exon 1 of 5)	121	NM_001032409	4938	Hs.524760	NM_002534	ENSG00000089127	OAS1	E18/E16|IFI-4|OIAS|OIASI	2'-5'-oligoadenylate synthetase 1	protein-coding	3.28532
chr17	76958336	76958836	Intergenic	Intergenic	17475	NM_005567	3959	Hs.514535	NM_005567	ENSG00000108679	LGALS3BP	90K|BTBD17B|CyCAP|M2BP|MAC-2-BP|TANGO10B|gp90	galectin 3 binding protein	protein-coding	3.53006
chr3	183003544	183004366	intron (NM_015078, intron 14 of 29)	intron (NM_015078, intron 14 of 29)	32923	NM_032047	84002	Hs.718506	NM_032047	ENSG00000176597	B3GNT5	B3GN-T5|beta3Gn-T5	UDP-GlcNAc:betaGal beta-1,3-N-acetylglucosaminyltransferase 5	protein-coding	2.81618
chr22	38979409	38979909	3' UTR (NM_001291030, exon 17 of 17)	3' UTR (NM_001291030, exon 17 of 17)	13154	NR_134627	105373031	Hs.144041	NR_134627		LOC105373031	-	uncharacterized LOC105373031	ncRNA	3.83943
chr1	152774346	152774846	Intergenic	Intergenic	4511	NM_178351	353133	Hs.516429	NM_178351	ENSG00000197084	LCE1C	LEP3	late cornified envelope 1C	protein-coding	inf
chr17	78193017	78193734	promoter-TSS (NM_001166349)	promoter-TSS (NM_001166349)	823	NM_000199	6448	Hs.31074	NM_000199	ENSG00000181523	SGSH	HSS|MPS3A|SFMD	N-sulfoglucosamine sulfohydrolase	protein-coding	3.54833
chr7	128221116	128221616	Intergenic	AluJb|SINE|Alu	-59929	NR_024368	402483	Hs.722350	NM_001039682		LINC01000	-	long intergenic non-protein coding RNA 1000	ncRNA	2.58443
chr1	41933720	41934220	Intergenic	Intergenic	16384	NM_001302269	1907	Hs.1407	NM_001956	ENSG00000127129	EDN2	ET-2|ET2|PPET2	endothelin 2	protein-coding	5.1387
chr10	126315644	126316144	intron (NM_014661, intron 4 of 4)	intron (NM_014661, intron 4 of 4)	-76703	NR_120631	101927944	Hs.437448	NR_120630		FAM53B-AS1	-	FAM53B antisense RNA 1	ncRNA	3.27315
chr10	100229876	100230376	intron (NM_001166246, intron 11 of 12)	intron (NM_001166246, intron 11 of 12)	-23406	NM_001322481	3257	Hs.404568	NM_000195	ENSG00000107521	HPS1	BLOC3S1|HPS	HPS1, biogenesis of lysosomal organelles complex 3 subunit 1	protein-coding	3.57326
chr13	115084738	115085392	intron (NM_001164145, intron 1 of 2)	MER8|DNA|TcMar-Tigger	5255	NM_001164144	283489	Hs.7542	NM_032436	ENSG00000198824	CHAMP1	C13orf8|CAMP|CHAMP|MRD40|ZNF828	chromosome alignment maintaining phosphoprotein 1	protein-coding	2.63834
chr1	19217175	19217675	promoter-TSS (NM_001161504)	promoter-TSS (NM_001161504)	-40	NM_001161504	8659	Hs.77448	NM_003748	ENSG00000159423	ALDH4A1	ALDH4|P5CD|P5CDh	aldehyde dehydrogenase 4 family member A1	protein-coding	5.80863
chr2	177861807	177862307	Intergenic	Intergenic	-215365	NM_001330247	220988	Hs.516539	NM_194247	ENSG00000170144	HNRNPA3	2610510D13Rik|D10S102|FBRNP|HNRPA3	heterogeneous nuclear ribonucleoprotein A3	protein-coding	2.66187
chr14	23321943	23323084	Intergenic	Intergenic	16772	NM_004995	4323	Hs.2399	NM_004995	ENSG00000157227	MMP14	MMP-14|MMP-X1|MT-MMP|MT-MMP 1|MT1-MMP|MT1MMP|MTMMP1|WNCHRS	matrix metallopeptidase 14	protein-coding	2.52528
chr11	124635837	124636337	TTS (NR_120577)	TTS (NR_120577)	3760	NR_120579	101929340	Hs.173840	NR_120577	ENSG00000250073	LOC101929340	-	uncharacterized LOC101929340	ncRNA	3.52859
chr20	55172356	55172856	Intergenic	AluJo|SINE|Alu	19987	NR_136537	105372682	Hs.517135	NR_136537	ENSG00000225657	LINC01716	-	long intergenic non-protein coding RNA 1716	ncRNA	4.3358
chr5	149968989	149969489	Intergenic	Intergenic	-11403	NM_001166208	11346	Hs.435228	NM_007286	ENSG00000171992	SYNPO	-	synaptopodin	protein-coding	4.48545
chr5	139023636	139024136	Intergenic	Intergenic	-2998	NM_001317201	51523	Hs.189119	NM_016463	ENSG00000171604	CXXC5	CF5|HSPC195|RINF|WID	CXXC finger protein 5	protein-coding	5.13315
chr16	17491351	17491851	intron (NM_022166, intron 1 of 11)	MIRc|SINE|MIR	73137	NM_022166	64131	Hs.22907	NM_022166	ENSG00000103489	XYLT1	DBQD2|PXYLT1|XT-I|XT1|XTI|XYLTI|xylT-I	xylosyltransferase 1	protein-coding	3.52379
chr5	139147287	139148069	Intergenic	Intergenic	-21870	NR_105053	101929696	Hs.147408	NR_105052	ENSG00000249131	PSD2-AS1	-	PSD2 antisense RNA 1	ncRNA	4.2976
chr16	81514933	81515433	intron (NM_198390, intron 1 of 20)	intron (NM_198390, intron 1 of 20)	-13771	NM_030629	80790	Hs.594095	NM_030629	ENSG00000153815	CMIP	TCMIP	c-Maf inducing protein	protein-coding	2.52564
chr3	47041851	47042351	intron (NM_015175, intron 27 of 53)	intron (NM_015175, intron 27 of 53)	-10931	NR_024046	100129354	Hs.201522	NR_024046		NRADDP	-	neurotrophin receptor associated death domain, pseudogene	pseudo	4.53932
chr17	32490088	32490588	Intergenic	Intergenic	-6513	NM_001094	40	Hs.368417	NM_001094	ENSG00000108684	ASIC2	ACCN|ACCN1|ASIC2a|BNC1|BNaC1|MDEG|hBNaC1	acid sensing ion channel subunit 2	protein-coding	4.11832
chr1	67009084	67009584	intron (NM_032291, intron 1 of 24)	intron (NM_032291, intron 1 of 24)	9695	NM_032291	84251	Hs.132121	NM_032291	ENSG00000118473	SGIP1	-	SH3 domain GRB2 like endophilin interacting protein 1	protein-coding	4.09576
chr2	242232750	242233250	intron (NM_005336, intron 1 of 27)	AluJb|SINE|Alu	-20699	NM_001320967	3069	Hs.471851	NM_005336	ENSG00000115677	HDLBP	HBP|PRO2900|VGL	high density lipoprotein binding protein	protein-coding	2.88566
chr10	73003596	73004457	intron (NM_170744, intron 1 of 16)	intron (NM_170744, intron 1 of 16)	-26042	NR_038453	728978	Hs.646725	NR_038453	ENSG00000237512	UNC5B-AS1	-	UNC5B antisense RNA 1	ncRNA	2.87279
chr10	45454483	45455322	promoter-TSS (NM_032023)	promoter-TSS (NM_032023)	234	NR_033842	220980	Hs.568801	NR_033842	ENSG00000224812	TMEM72-AS1	-	TMEM72 antisense RNA 1	ncRNA	2.49911
chr1	205558970	205559470	intron (NM_181644, intron 6 of 9)	L2|LINE|L2	21108	NM_181644	148808	Hs.567714	NM_181644	ENSG00000174514	MFSD4A	MFSD4|UNQ3064	major facilitator superfamily domain containing 4A	protein-coding	5.13276
chr2	33225939	33226439	intron (NM_206943, intron 2 of 33)	intron (NM_206943, intron 2 of 33)	53820	NM_206943	4052	Hs.619315	NM_000627	ENSG00000049323	LTBP1	-	latent transforming growth factor beta binding protein 1	protein-coding	3.66588
chr22	19046120	19046620	intron (NR_033674, intron 4 of 8)	intron (NR_033674, intron 4 of 8)	-10482	NR_024157	25786	Hs.720269	NR_024157	ENSG00000273311	DGCR11	DGS-D	DiGeorge syndrome critical region gene 11 (non-protein coding)	ncRNA	3.69416
chr6	3987213	3987713	Intergenic	Intergenic	-34106	NM_003913	8899	Hs.159014	NM_003913	ENSG00000112739	PRPF4B	PR4H|PRP4|PRP4H|PRP4K|dJ1013A10.1	pre-mRNA processing factor 4B	protein-coding	3.13681
chr12	123534755	123535255	intron (NM_020845, intron 1 of 24)	MIR3|SINE|MIR	-30926	NR_038290	100507091	Hs.683912	NR_038290	ENSG00000251497	LOC100507091	-	uncharacterized LOC100507091	ncRNA	3.46123
chr14	102616957	102617457	intron (NM_001242418, intron 1 of 2)	intron (NM_001242418, intron 1 of 2)	11018	NM_001242416	91833	Hs.36859	NM_144574	ENSG00000140153	WDR20	DMR	WD repeat domain 20	protein-coding	4.90032
chr8	143829785	143830285	Intergenic	Intergenic	3917	NM_205545	137797	Hs.441280	NM_205545	ENSG00000197353	LYPD2	LYPDC2|UNQ430	LY6/PLAUR domain containing 2	protein-coding	4.25755
chr8	103825344	103825844	Intergenic	Intergenic	50834	NM_001301668	51582	Hs.459106	NM_015878	ENSG00000155096	AZIN1	AZI|AZIA1|OAZI|OAZIN|ODC1L	antizyme inhibitor 1	protein-coding	5.03591
chr7	55334262	55334914	Intergenic	Intergenic	-11260	NR_110426	102725541	Hs.590524	NR_110426		ELDR	Fabl|LINC01156	EGFR long non-coding downstream RNA	ncRNA	inf
chr11	108430518	108431166	intron (NM_001308019, intron 2 of 6)	intron (NM_001308019, intron 2 of 6)	-7910	NM_001144763	23086	Hs.28540	NM_015065	ENSG00000110723	EXPH5	SLAC2-B|SLAC2B	exophilin 5	protein-coding	3.11718
chr7	153532717	153533217	Intergenic	Intergenic	-51215	NM_001039350	1804	Hs.490684	NM_001936	ENSG00000130226	DPP6	DPL1|DPPX|MRD33|VF2	dipeptidyl peptidase like 6	protein-coding	3.69188
chr17	46012231	46012731	intron (NR_103857, intron 1 of 2)	intron (NR_103857, intron 1 of 2)	6289	NR_103857	100506325	Hs.656008	NR_103856	ENSG00000234494	SP2-AS1	-	SP2 antisense RNA 1	ncRNA	3.60389
chr22	45659234	45660018	Intergenic	Intergenic	-21242	NM_001167574	7380	Hs.632787	NM_006953	ENSG00000100373	UPK3A	UP3A|UPIII|UPIIIA|UPK3	uroplakin 3A	protein-coding	3.54285
chr16	31440594	31441094	Intergenic	L2b|LINE|L2	-1095	NM_005205	1339	Hs.250760	NM_005205	ENSG00000156885	COX6A2	COX6AH|COXVIAH	cytochrome c oxidase subunit 6A2	protein-coding	4.42112
chr17	55634658	55635548	intron (NM_170721, intron 6 of 9)	intron (NM_170721, intron 6 of 9)	-34145	NR_110808	101927557	Hs.639984	NR_110808	ENSG00000266100	LOC101927557	-	uncharacterized LOC101927557	ncRNA	2.68132
chr4	153988483	153988983	Intergenic	Intergenic	-85537	NM_001130067	23321	Hs.435711	NM_015271	ENSG00000109654	TRIM2	CMT2R|RNF86	tripartite motif containing 2	protein-coding	3.14428
chr12	53065976	53066567	Intergenic	Intergenic	7919	NM_006121	3848	Hs.80828	NM_006121	ENSG00000167768	KRT1	CK1|EHK|EHK1|EPPK|K1|KRT1A|NEPPK	keratin 1	protein-coding	2.69366
chr11	120779115	120779615	intron (NM_001282470, intron 12 of 19)	LTR16E2|LTR|ERVL	-13859	NR_132790	101929227	Hs.627156	NR_132790	ENSG00000250493	LOC101929227	-	uncharacterized LOC101929227	ncRNA	4.11648
chr11	10324575	10325075	Intergenic	CpG	-1702	NM_001124	133	Hs.441047	NM_001124	ENSG00000148926	ADM	AM|PAMP	adrenomedullin	protein-coding	3.07225
chr9	100843669	100844169	intron (NM_018946, intron 5 of 5)	intron (NM_018946, intron 5 of 5)	24960	NM_018946	54187	Hs.522310	NM_018946	ENSG00000095380	NANS	HEL-S-100|SAS|SEMDCG|SEMDG	N-acetylneuraminate synthase	protein-coding	2.3677
chr11	86219476	86220376	intron (NM_001014811, intron 3 of 13)	intron (NM_001014811, intron 3 of 13)	134148	NM_021827	60494	Hs.144913	NM_021827	ENSG00000149201	CCDC81	-	coiled-coil domain containing 81	protein-coding	2.37444
chr2	122338349	122338849	intron (NM_001142274, intron 2 of 37)	intron (NM_001142274, intron 2 of 37)	50143	NR_023343	100151683	Hs.689638	NR_023343	ENSG00000264229	RNU4ATAC	MOPD1|RFMN|RNU4ATAC1|TALS|U4ATAC	RNA, U4atac small nuclear (U12-dependent splicing)	snRNA	3.03215
chrX	51777163	51777663	Intergenic	L1MEc|LINE|L1	29156	NR_102368	101340250		NR_102368	ENSG00000221705	SNORA11E	-	small nucleolar RNA, H/ACA box 11E	snoRNA	inf
chr6	21953954	21954454	intron (NR_015410, intron 5 of 11)	intron (NR_015410, intron 5 of 11)	193218	NR_034143	729177	Hs.730673	NR_034143	ENSG00000260455	NBAT1	CASC14|NBAT-1	neuroblastoma associated transcript 1	ncRNA	3.51526
chr12	111805428	111805928	intron (NM_001177996, intron 1 of 3)	intron (NM_001177996, intron 1 of 3)	1247	NM_001177996	144717	Hs.173088	NM_144671	ENSG00000198324	FAM109A	IPIP27A|SES1	family with sequence similarity 109 member A	protein-coding	4.25436
chr10	103862292	103862951	Intergenic	FAM|SINE|Alu	12101	NM_003893	8861	Hs.454418	NM_003893	ENSG00000198728	LDB1	CLIM-2|CLIM2|LDB-1|NLI	LIM domain binding 1	protein-coding	3.88103
chr8	129026853	129027353	intron (NR_003367, intron 5 of 8)	intron (NR_003367, intron 5 of 8)	5959	NR_031611	100302170		NR_031611	ENSG00000283200	MIR1206	MIRN1206|hsa-mir-1206	microRNA 1206	ncRNA	2.83022
chr7	66913967	66914467	Intergenic	Intergenic	113254	NR_108104	101929736	Hs.634050	NR_108104	ENSG00000235475	LINC01372	-	long intergenic non-protein coding RNA 1372	ncRNA	2.84864
chr22	37574523	37575023	Intergenic	Intergenic	-3615	NM_001346222	3560	Hs.474787	NM_000878	ENSG00000100385	IL2RB	CD122|IL15RB|P70-75	interleukin 2 receptor subunit beta	protein-coding	4.81201
chr13	30307396	30307896	Intergenic	L2b|LINE|L2	85816	NR_135320	102723345	Hs.121353	NR_135320		LOC102723345	-	uncharacterized LOC102723345	ncRNA	2.59747
chr11	57248001	57248501	Intergenic	Intergenic	20241	NM_178570	349667	Hs.502618	NM_178570	ENSG00000186907	RTN4RL2	NGRH1|NgR2	reticulon 4 receptor-like 2	protein-coding	3.84524
chr12	53216036	53216536	intron (NM_175834, intron 7 of 8)	intron (NM_175834, intron 7 of 8)	-8386	NM_002272	3851	Hs.654610	NM_002272	ENSG00000170477	KRT4	CK-4|CK4|CYK4|K4|WSN1	keratin 4	protein-coding	3.67756
chr14	91593602	91594253	intron (NM_001286471, intron 1 of 13)	intron (NM_001286471, intron 1 of 13)	1158	NR_003709	100124539	Hs.693444	NR_003709	ENSG00000221102	SNORA11B	-	small nucleolar RNA, H/ACA box 11B	snoRNA	3.20587
chr12	120070126	120070626	intron (NM_001136534, intron 2 of 2)	MER102c|DNA|hAT-Charlie	-35385	NM_006253	5564	Hs.741184	NM_006253	ENSG00000111725	PRKAB1	AMPK|HAMPKb	protein kinase AMP-activated non-catalytic subunit beta 1	protein-coding	3.28289
chr4	8429359	8429859	intron (NM_003501, intron 1 of 17)	intron (NM_003501, intron 1 of 17)	12843	NM_001101667	8310	Hs.479122	NM_003501	ENSG00000087008	ACOX3	-	acyl-CoA oxidase 3, pristanoyl	protein-coding	3.14824
chr1	234321736	234322425	intron (NM_173508, intron 2 of 7)	intron (NM_173508, intron 2 of 7)	-27876	NM_001300845	148641	Hs.158748	NM_173508	ENSG00000183780	SLC35F3	-	solute carrier family 35 member F3	protein-coding	2.75083
chr1	207414676	207415367	Intergenic	Intergenic	-79795	NM_000574	1604	Hs.126517	NM_000574	ENSG00000196352	CD55	CR|CROM|DAF|TC	CD55 molecule (Cromer blood group)	protein-coding	5.02734
chr7	155026660	155027160	Intergenic	Intergenic	-62572	NM_001346590	3638	Hs.520819	NM_005542	ENSG00000186480	INSIG1	CL6	insulin induced gene 1	protein-coding	4.67206
chr5	146795189	146795689	intron (NM_001387, intron 3 of 13)	intron (NM_001387, intron 3 of 13)	37821	NM_001387	1809	Hs.519659	NM_001387	ENSG00000113657	DPYSL3	CRMP-4|CRMP4|DRP-3|DRP3|LCRMP|ULIP|ULIP-1	dihydropyrimidinase like 3	protein-coding	3.3181
chr12	72192753	72193253	Intergenic	LTR67B|LTR|ERVL	-40484	NM_022771	64786	Hs.284630	NM_022771	ENSG00000121749	TBC1D15	RAB7-GAP	TBC1 domain family member 15	protein-coding	2.5646
chr5	95351798	95352298	intron (NR_130776, intron 1 of 4)	intron (NR_130776, intron 1 of 4)	-54273	NM_012081	22936	Hs.192221	NM_012081	ENSG00000118985	ELL2	-	elongation factor for RNA polymerase II 2	protein-coding	4.64926
chr5	125705793	125706293	intron (NM_001146319, intron 1 of 13)	MamSINE1|SINE|tRNA	10255	NM_001146319	65983	Hs.363558	NM_023927	ENSG00000155324	GRAMD3	NS3TP2	GRAM domain containing 3	protein-coding	3.31308
chr5	152900511	152901011	intron (NM_001258020, intron 3 of 16)	intron (NM_001258020, intron 3 of 16)	29029	NM_001258022	2890	Hs.519693	NM_000827	ENSG00000155511	GRIA1	GLUH1|GLUR1|GLURA|GluA1|HBGR1	glutamate ionotropic receptor AMPA type subunit 1	protein-coding	4.04241
chr12	13374925	13375425	Intergenic	MER115|DNA|hAT-Tip100	25573	NM_001423	2012	Hs.719042	NM_001423	ENSG00000134531	EMP1	CL-20|EMP-1|TMP	epithelial membrane protein 1	protein-coding	3.2538
chr15	70035408	70035908	Intergenic	L2c|LINE|L2	-91915	NR_026764	414926	Hs.569502	NR_026764	ENSG00000259703	LINC00593	C15orf50	long intergenic non-protein coding RNA 593	ncRNA	4.50214
chr3	47039602	47040102	intron (NM_015175, intron 21 of 53)	intron (NM_015175, intron 21 of 53)	-13180	NR_024046	100129354	Hs.201522	NR_024046		NRADDP	-	neurotrophin receptor associated death domain, pseudogene	pseudo	3.54537
chr8	129209318	129209818	Intergenic	Intergenic	47206	NR_031613	100302281		NR_031613	ENSG00000221261	MIR1208	MIRN1208|hsa-mir-1208	microRNA 1208	ncRNA	2.73468
chr13	28609218	28609718	intron (NR_130706, intron 12 of 24)	intron (NR_130706, intron 12 of 24)	-46694	NM_001105577	646625	Hs.705356	NM_001105577	ENSG00000183463	URAD	PRHOXNB	ureidoimidazoline (2-oxo-4-hydroxy-4-carboxy-5-) decarboxylase	protein-coding	3.47697
chr8	74878379	74878879	intron (NM_001204858, intron 1 of 4)	intron (NM_001204858, intron 1 of 4)	5514	NM_001204862	6921	Hs.533437	NM_005648	ENSG00000154582	ELOC	SIII|TCEB1	elongin C	protein-coding	2.7554
chr12	89769462	89769962	Intergenic	Intergenic	-23076	NM_022652	1848	Hs.298654	NM_001946	ENSG00000139318	DUSP6	HH19|MKP3|PYST1	dual specificity phosphatase 6	protein-coding	3.40498
chr18	51780735	51781235	Intergenic	Intergenic	-14864	NM_007195	11201	Hs.438533	NM_007195	ENSG00000101751	POLI	RAD30B|RAD3OB	DNA polymerase iota	protein-coding	2.41568
chr2	72175942	72176442	Intergenic	Intergenic	198799	NM_001277742	56603	Hs.91546	NM_019885	ENSG00000003137	CYP26B1	CYP26A2|P450RAI-2|P450RAI2|RHFCA	cytochrome P450 family 26 subfamily B member 1	protein-coding	2.60617
chr3	183879255	183879755	intron (NM_004423, intron 1 of 14)	intron (NM_004423, intron 1 of 14)	6221	NM_004423	1857	Hs.388116	NM_004423	ENSG00000161202	DVL3	DRS3	dishevelled segment polarity protein 3	protein-coding	5.21621
chr10	65498046	65498706	Intergenic	Ricksha_c|DNA|MuDR	-216541	NM_001322258	221037	Hs.413416	NM_004241	ENSG00000171988	JMJD1C	KDM3C|TRIP-8|TRIP8	jumonji domain containing 1C	protein-coding	3.53526
chr1	90069801	90070301	Intergenic	Intergenic	28402	NR_033981	400761	Hs.741594	NR_033981	ENSG00000231999	FLJ27354	-	uncharacterized LOC400761	ncRNA	4.35706
chr22	39898964	39899464	intron (NM_019008, intron 1 of 5)	MIR|SINE|MIR	979	NR_130790	54471	Hs.728085	NM_013298	ENSG00000100335	MIEF1	HSU79252|MID51|SMCR7L|dJ1104E15.3	mitochondrial elongation factor 1	protein-coding	3.69225
chr8	68604953	68605453	intron (NM_020361, intron 1 of 10)	intron (NM_020361, intron 1 of 10)	53417	NM_020361	57094	Hs.658850	NM_020361	ENSG00000165078	CPA6	CPAH|ETL5|FEB11	carboxypeptidase A6	protein-coding	2.71177
chrX	13084497	13084997	Intergenic	Intergenic	-21830	NM_174901	171484	Hs.667546	NM_174901	ENSG00000187268	FAM9C	TEX39C	family with sequence similarity 9 member C	protein-coding	3.98585
chr6	149042003	149042503	Intergenic	Intergenic	-26018	NM_005715	10090	Hs.657370	NM_005715	ENSG00000111962	UST	2OST	uronyl 2-sulfotransferase	protein-coding	3.90841
chr5	113755576	113756076	intron (NM_021614, intron 3 of 7)	intron (NM_021614, intron 3 of 7)	-13401	NM_170775	3781	Hs.98280	NM_021614	ENSG00000080709	KCNN2	KCa2.2|SK2|SKCA2|SKCa 2|hSK2	potassium calcium-activated channel subfamily N member 2	protein-coding	3.62656
chr5	154103671	154104171	intron (NM_015315, intron 1 of 18)	intron (NM_015315, intron 1 of 18)	11459	NM_015315	23367	Hs.292078	NM_015315	ENSG00000155506	LARP1	LARP	La ribonucleoprotein domain family member 1	protein-coding	4.16844
chr3	42084085	42084821	Intergenic	Intergenic	-48293	NM_001042646	22906	Hs.535711	NM_014965	ENSG00000182606	TRAK1	MILT1|OIP106	trafficking kinesin protein 1	protein-coding	4.42434
chr3	18194985	18195485	intron (NM_001257177, intron 4 of 4)	MLT2B5|LTR|ERVL	191171	NM_001257177	339862	Hs.652981	NM_001257177		LOC339862	-	uncharacterized LOC339862	protein-coding	2.40404
chr10	112403515	112404525	promoter-TSS (NM_001134363)	promoter-TSS (NM_001134363)	-135	NM_001134363	282996	Hs.116630	NM_001134363	ENSG00000203867	RBM20	-	RNA binding motif protein 20	protein-coding	2.58453
chr16	70720888	70721388	TTS (NM_018052)	TTS (NM_018052)	-1184	NM_138383	92154	Hs.432387	NM_138383	ENSG00000132613	MTSS1L	ABBA|ABBA-1|ABBA1	MTSS1L, I-BAR domain containing	protein-coding	3.17159
chr14	22658195	22658695	Intergenic	Intergenic	399698	NM_001344	1603	Hs.82890	NM_001344	ENSG00000129562	DAD1	OST2	defender against cell death 1	protein-coding	2.60932
chr19	41224700	41225377	intron (NM_025194, intron 1 of 6)	intron (NM_025194, intron 1 of 6)	2031	NM_025194	80271	Hs.515415	NM_025194	ENSG00000086544	ITPKC	IP3-3KC|IP3KC	inositol-trisphosphate 3-kinase C	protein-coding	2.40142
chr21	47161510	47162010	Intergenic	Intergenic	94573	NR_038876	100129027	Hs.689591	NR_038876	ENSG00000205424	LOC100129027	-	uncharacterized LOC100129027	ncRNA	4.17485
chr22	49816214	49816714	intron (NR_110522, intron 1 of 2)	MER92C|LTR|ERV1	120650	NR_037440	100500882		NR_037440	ENSG00000264139	MIR3667	-	microRNA 3667	ncRNA	3.64536
chr1	18555140	18556107	intron (NM_032880, intron 2 of 9)	intron (NM_032880, intron 2 of 9)	121384	NM_032880	84966	Hs.212511	NM_032880	ENSG00000117154	IGSF21	-	immunoglobin superfamily member 21	protein-coding	3.76255
chr20	48190511	48191011	Intergenic	MLT1K|LTR|ERVL-MaLR	-6054	NM_000961	5740	Hs.302085	NM_000961	ENSG00000124212	PTGIS	CYP8|CYP8A1|PGIS|PTGI	prostaglandin I2 synthase	protein-coding	5.492
chr15	71571290	71572471	intron (NM_024817, intron 5 of 16)	intron (NM_024817, intron 5 of 16)	-90483	NR_120350	101929196	Hs.680472	NR_120348		THSD4-AS1	-	THSD4 antisense RNA 1	ncRNA	3.45324
chr5	54897082	54897582	Intergenic	Intergenic	-66426	NM_176895	8611	Hs.696231	NM_003711	ENSG00000067113	PLPP1	LLP1a|LPP1|PAP-2a|PAP2|PPAP2A	phospholipid phosphatase 1	protein-coding	2.76945
chr5	177664348	177664848	TTS (NM_173465)	TTS (NM_173465)	-4775	NR_103509	85007	Hs.248746	NM_153373	ENSG00000175309	PHYKPL	AGXT2L2|PHLU	5-phosphohydroxy-L-lysine phospho-lyase	protein-coding	3.11768
chr1	21553535	21554035	intron (NM_001113349, intron 14 of 17)	intron (NM_001113349, intron 14 of 17)	-50404	NM_001198801	8672	Hs.467084	NM_003760	ENSG00000075151	EIF4G3	eIF-4G 3|eIF4G 3|eIF4GII	eukaryotic translation initiation factor 4 gamma 3	protein-coding	4.06445
chr10	79788683	79789543	intron (NM_007055, intron 1 of 30)	intron (NM_007055, intron 1 of 30)	185	NM_007055	11128	Hs.436896	NM_007055	ENSG00000148606	POLR3A	ADDH|HLD7|RPC1|RPC155|hRPC155	RNA polymerase III subunit A	protein-coding	3.67438
chr9	129110376	129110876	intron (NM_033446, intron 2 of 9)	intron (NM_033446, intron 2 of 9)	21503	NM_033446	89853	Hs.162659	NM_033446	ENSG00000196814	MVB12B	C9orf28|FAM125B	multivesicular body subunit 12B	protein-coding	3.51325
chr6	41521057	41521557	intron (NM_001012426, intron 1 of 16)	intron (NM_001012426, intron 1 of 16)	-4948	NR_126415	101060264	Hs.571099	NR_126415	ENSG00000234753	FOXP4-AS1	-	FOXP4 antisense RNA 1	ncRNA	5.06008
chr7	38380847	38381347	promoter-TSS (NR_040085)	promoter-TSS (NR_040085)	-81	NR_040085	100506776	Hs.173034	NR_040085	ENSG00000281103	TRG-AS1	TCRGV	T cell receptor gamma locus antisense RNA 1	ncRNA	2.62985
chr3	156843513	156844013	Intergenic	LTR82A|LTR|ERVL	-2972	NR_034007	339894	Hs.478050	NR_034007	ENSG00000243629	LINC00880	-	long intergenic non-protein coding RNA 880	ncRNA	3.54264
chr16	28242943	28243443	Intergenic	Intergenic	-19954	NM_015171	23214	Hs.460468	NM_015171	ENSG00000169180	XPO6	EXP6|RANBP20	exportin 6	protein-coding	5.2009
chr3	12199910	12200410	intron (NM_003256, intron 1 of 4)	intron (NM_003256, intron 1 of 4)	691	NM_003256	7079	Hs.591665	NM_003256	ENSG00000157150	TIMP4	-	TIMP metallopeptidase inhibitor 4	protein-coding	2.38721
chr11	15515487	15515987	Intergenic	MER54B|LTR|ERVL	-149694	NM_001293172	102724957	Hs.512245	NM_001293172	ENSG00000254695	LOC102724957	-	uncharacterized LOC102724957	protein-coding	3.76597
chr9	124402138	124402638	intron (NM_032552, intron 1 of 16)	intron (NM_032552, intron 1 of 16)	73007	NM_032552	153090	Hs.522378	NM_032552	ENSG00000136848	DAB2IP	AF9Q34|AIP-1|AIP1|DIP1/2	DAB2 interacting protein	protein-coding	3.9022
chr12	122976444	122976944	intron (NM_017612, intron 3 of 13)	intron (NM_017612, intron 3 of 13)	8926	NM_017612	55596	Hs.37706	NM_017612	ENSG00000033030	ZCCHC8	-	zinc finger CCHC-type containing 8	protein-coding	4.06668
chr17	8953949	8954872	intron (NM_004822, intron 2 of 6)	intron (NM_004822, intron 2 of 6)	29552	NM_004822	9423	Hs.660885	NM_004822	ENSG00000065320	NTN1	NTN1L	netrin 1	protein-coding	2.92662
chr4	10007836	10008336	intron (NM_001001290, intron 3 of 12)	intron (NM_001001290, intron 3 of 12)	15028	NM_020041	56606	Hs.444612	NM_020041	ENSG00000109667	SLC2A9	GLUT9|GLUTX|UAQTL2|URATv1	solute carrier family 2 member 9	protein-coding	2.92282
chrX	73461802	73462302	intron (NR_028379, intron 5 of 6)	intron (NR_028379, intron 5 of 6)	-23599	NR_030620	100126317		NR_030620	ENSG00000212027	MIR374B	MIRN374B|mir-374b	microRNA 374b	ncRNA	2.93386
chrX	128811647	128812605	Intergenic	Intergenic	-23193	NM_017413	8862	Hs.303084	NM_017413	ENSG00000171388	APLN	APEL|XNPEP2	apelin	protein-coding	3.03212
chr16	57896633	57897133	Intergenic	L2a|LINE|L2	52334	NM_001278081	388282	Hs.434720	NM_001278081		LOC388282	-	uncharacterized LOC388282	protein-coding	3.56752
chr16	55768560	55769060	intron (NR_033740, intron 7 of 13)	intron (NR_033740, intron 7 of 13)	9973	NR_033740	390732	Hs.554599	NR_033740		CES1P2	-	carboxylesterase 1 pseudogene 2	pseudo	4.93479
chr5	136672399	136672899	intron (NM_004598, intron 2 of 10)	intron (NM_004598, intron 2 of 10)	162369	NM_004598	6695	Hs.596136	NM_004598	ENSG00000152377	SPOCK1	SPOCK|TESTICAN|TIC1	SPARC/osteonectin, cwcv and kazal like domains proteoglycan 1	protein-coding	3.47377
chr20	43489949	43490646	Intergenic	Intergenic	-23942	NM_139323	7529	Hs.643544	NM_003404	ENSG00000166913	YWHAB	GW128|HEL-S-1|HS1|KCIP-1|YWHAA	tyrosine 3-monooxygenase/tryptophan 5-monooxygenase activation protein beta	protein-coding	2.61386
chr2	238805134	238805634	intron (NM_001308353, intron 3 of 3)	AluJo|SINE|Alu	37197	NM_001308353	10267	Hs.471783	NM_005855	ENSG00000132329	RAMP1	-	receptor activity modifying protein 1	protein-coding	2.76523
chr17	57838964	57839612	intron (NM_001329401, intron 4 of 9)	L1MEc|LINE|L1	-54329	NM_016077	51651	Hs.12677	NM_016077	ENSG00000141378	PTRH2	BIT1|CFAP37|CGI-147|IMNEPD|PTH|PTH 2|PTH2	peptidyl-tRNA hydrolase 2	protein-coding	4.13457
chr12	109037580	109038080	Intergenic	Intergenic	8244	NR_039717	100616240		NR_039717	ENSG00000257221	MIR4496	-	microRNA 4496	ncRNA	2.56198
chr15	57904046	57904546	intron (NR_104371, intron 2 of 16)	intron (NR_104371, intron 2 of 16)	20194	NM_001018091	145781	Hs.437256	NM_001018090	ENSG00000137878	GCOM1	GRINL1A|Gcom2|MYZAP|MYZAP-POLR2M|gcom	GRINL1A complex locus 1	protein-coding	2.91303
chr10	114139745	114140245	intron (NM_016234, intron 1 of 20)	intron (NM_016234, intron 1 of 20)	4039	NM_016234	51703	Hs.11638	NM_016234	ENSG00000197142	ACSL5	ACS2|ACS5|FACL5	acyl-CoA synthetase long-chain family member 5	protein-coding	3.17436
chr8	98729476	98729976	intron (NM_178812, intron 9 of 11)	intron (NM_178812, intron 9 of 11)	-58083	NM_018407	55353	Hs.492314	NM_018407	ENSG00000104341	LAPTM4B	LAPTM4beta|LC27	lysosomal protein transmembrane 4 beta	protein-coding	3.22682
chr2	113232662	113233162	Intergenic	MER115|DNA|hAT-Tip100	-6831	NM_153712	150465	Hs.358997	NM_153712	ENSG00000114999	TTL	-	tubulin tyrosine ligase	protein-coding	4.66505
chr10	75617185	75617685	intron (NM_172171, intron 3 of 20)	intron (NM_172171, intron 3 of 20)	16914	NM_001222	818	Hs.523045	NM_001222	ENSG00000148660	CAMK2G	CAMK|CAMK-II|CAMKG	calcium/calmodulin dependent protein kinase II gamma	protein-coding	2.82762
chr7	43679419	43679919	intron (NM_018224, intron 5 of 5)	intron (NM_018224, intron 5 of 5)	56977	NM_004760	9263	Hs.709489	NM_004760	ENSG00000164543	STK17A	DRAK1	serine/threonine kinase 17a	protein-coding	3.67524
chr2	12443457	12444064	intron (NR_110196, intron 3 of 5)	intron (NR_110196, intron 3 of 5)	104505	NR_037452	100500884		NR_037452	ENSG00000264089	MIR3681	-	microRNA 3681	ncRNA	2.3407
chr4	42290779	42291279	Intergenic	HERV17-int|LTR|ERV1	102256	NR_134668	105374428	Hs.245131	NR_134668	ENSG00000250781	LOC105374428	-	uncharacterized LOC105374428	ncRNA	2.87598
chr4	183692026	183692526	intron (NM_001080477, intron 22 of 27)	intron (NM_001080477, intron 22 of 27)	146354	NM_001921	1635	Hs.183850	NM_001921	ENSG00000129187	DCTD	-	dCMP deaminase	protein-coding	4.54654
chr15	84128890	84129390	intron (NR_136713, intron 1 of 9)	LTR49-int|LTR|ERV1	13160	NM_001324185	6457	Hs.270055	NM_003027	ENSG00000140600	SH3GL3	CNSA3|EEN-B2|HsT19371|SH3D2C|SH3P13	SH3 domain containing GRB2 like 3, endophilin A3	protein-coding	3.0257
chr10	98433461	98433961	intron (NM_152309, intron 2 of 16)	intron (NM_152309, intron 2 of 16)	46568	NM_152309	118788	Hs.310456	NM_152309	ENSG00000155629	PIK3AP1	BCAP	phosphoinositide-3-kinase adaptor protein 1	protein-coding	2.38559
chr17	58650402	58651144	intron (NR_126009, intron 2 of 3)	intron (NR_126009, intron 2 of 3)	8866	NR_126009	388406	Hs.368309	NR_126009	ENSG00000267772	LINC01999	-	long intergenic non-protein coding RNA 1999	ncRNA	2.86806
chr20	30129968	30130468	intron (NM_178580, intron 3 of 12)	intron (NM_178580, intron 3 of 12)	28005	NM_178582	81502	Hs.373741	NM_030789	ENSG00000101294	HM13	H13|IMP1|IMPAS|IMPAS-1|MSTP086|PSENL3|PSL3|SPP|SPPL1	histocompatibility minor 13	protein-coding	2.50335
chr15	99337960	99338460	intron (NM_000875, intron 2 of 20)	intron (NM_000875, intron 2 of 20)	10555	NR_039864	100616432		NR_039864	ENSG00000264480	MIR4714	-	microRNA 4714	ncRNA	3.08518
chr2	205121864	205122364	Intergenic	Intergenic	-288402	NM_152526	117583	Hs.657382	NM_057177	ENSG00000116117	PARD3B	ALS2CR19|PAR3B|PAR3L|PAR3beta	par-3 family cell polarity regulator beta	protein-coding	2.78384
chr1	209552145	209552645	Intergenic	AluSz|SINE|Alu	-49773	NM_001104548	642587	Hs.510543	NM_001104548		MIR205HG	LINC00510	MIR205 host gene	protein-coding	4.47588
chr3	43673671	43674171	intron (NM_001346469, intron 1 of 11)	LTR33|LTR|ERVL	-10352	NM_001346464	55129	Hs.656657	NM_018075	ENSG00000160746	ANO10	SCAR10|TMEM16K	anoctamin 10	protein-coding	3.62618
chr1	94655378	94655878	exon (NM_001328667, exon 12 of 22)	exon (NM_001328667, exon 12 of 22)	47679	NM_004815	9411	Hs.483238	NM_004815	ENSG00000137962	ARHGAP29	PARG1	Rho GTPase activating protein 29	protein-coding	inf
chr14	93417474	93417974	intron (NM_001142593, intron 9 of 10)	MIRb|SINE|MIR	28279	NM_001275	1113	Hs.150793	NM_001275	ENSG00000100604	CHGA	CGA	chromogranin A	protein-coding	5.95296
chr6	37095735	37096235	Intergenic	L2c|LINE|L2	-41937	NM_002648	5292	Hs.81170	NM_002648	ENSG00000137193	PIM1	PIM	Pim-1 proto-oncogene, serine/threonine kinase	protein-coding	4.0932
chr17	79790971	79791902	promoter-TSS (NM_001288799)	promoter-TSS (NM_001288799)	-267	NM_207368	348262	Hs.514632	NM_207368	ENSG00000225663	MCRIP1	FAM195B|GRAN2|MCRIP	MAPK regulated corepressor interacting protein 1	protein-coding	4.07564
chr20	56122298	56122798	Intergenic	Intergenic	-13589	NM_002591	5105	Hs.1872	NM_002591	ENSG00000124253	PCK1	PEPCK-C|PEPCK1|PEPCKC	phosphoenolpyruvate carboxykinase 1	protein-coding	3.54178
chr15	89610490	89610990	Intergenic	LTR14B|LTR|ERVK	-20641	NM_007011	11057	Hs.122337	NM_007011	ENSG00000140526	ABHD2	HS1-2|LABH2|PHPS1-2	abhydrolase domain containing 2	protein-coding	4.30794
chr20	33437691	33438191	intron (NM_178026, intron 13 of 14)	intron (NM_178026, intron 13 of 14)	-15676	NR_002165	128872	Hs.558624	NR_002165		HMGB3P1	HMG4L|HMGB3L1|dJ18C9.3	high mobility group box 3 pseudogene 1	pseudo	4.09173
chr5	32612182	32612682	Intergenic	Intergenic	26827	NM_006713	10923	Hs.229641	NM_006713	ENSG00000113387	SUB1	P15|PC4|p14	SUB1 homolog, transcriptional regulator	protein-coding	3.05052
chr21	43135873	43136373	promoter-TSS (NR_027272)	promoter-TSS (NR_027272)	-188	NR_027272	150135	Hs.350679	NM_152506	ENSG00000236384	LINC00479	C21orf129|PRED76	long intergenic non-protein coding RNA 479	ncRNA	3.71401
chr17	54989678	54990178	intron (NM_005082, intron 1 of 8)	intron (NM_005082, intron 1 of 8)	1481	NM_005082	7706	Hs.528952	NM_005082	ENSG00000121060	TRIM25	EFP|RNF147|Z147|ZNF147	tripartite motif containing 25	protein-coding	4.09454
chr3	102694161	102694661	Intergenic	L2a|LINE|L2	540552	NM_001329788	131368	Hs.352213	NM_175056	ENSG00000170044	ZPLD1	-	zona pellucida like domain containing 1	protein-coding	inf
chr15	75044647	75045147	intron (NM_000761, intron 5 of 6)	intron (NM_000761, intron 5 of 6)	3713	NM_000761	1544	Hs.1361	NM_000761	ENSG00000140505	CYP1A2	CP12|P3-450|P450(PA)	cytochrome P450 family 1 subfamily A member 2	protein-coding	2.69538
chr19	535091	535591	intron (NM_004359, intron 1 of 4)	intron (NM_004359, intron 1 of 4)	3608	NM_004359	997	Hs.514997	NM_004359	ENSG00000099804	CDC34	E2-CDC34|UBC3|UBCH3|UBE2R1	cell division cycle 34	protein-coding	2.75632
chr17	48225101	48225601	intron (NM_032595, intron 3 of 11)	intron (NM_032595, intron 3 of 11)	2527	NM_032595	84687	Hs.514323	NM_032595	ENSG00000108819	PPP1R9B	PPP1R6|PPP1R9|SPINO|Spn	protein phosphatase 1 regulatory subunit 9B	protein-coding	3.76423
chr3	183025099	183025599	intron (NM_015078, intron 10 of 29)	intron (NM_015078, intron 10 of 29)	54317	NM_032047	84002	Hs.718506	NM_032047	ENSG00000176597	B3GNT5	B3GN-T5|beta3Gn-T5	UDP-GlcNAc:betaGal beta-1,3-N-acetylglucosaminyltransferase 5	protein-coding	2.95737
chr14	69086791	69087291	intron (NM_001321818, intron 10 of 10)	intron (NM_001321818, intron 10 of 10)	8463	NR_135816	100996664		NR_135816		LOC100996664	-	uncharacterized LOC100996664	ncRNA	2.65664
chr11	62009433	62009933	promoter-TSS (NM_006551)	promoter-TSS (NM_006551)	-41	NM_006551	10647	Hs.204096	NM_006551	ENSG00000124935	SCGB1D2	LIPB|LPHB|LPNB	secretoglobin family 1D member 2	protein-coding	4.24369
chr3	98469354	98469854	intron (NM_001323366, intron 1 of 11)	L3|LINE|CR1	-12547	NM_001323368	10402	Hs.148716	NM_006100	ENSG00000064225	ST3GAL6	SIAT10|ST3GALVI	ST3 beta-galactoside alpha-2,3-sialyltransferase 6	protein-coding	3.17118
chr1	32566612	32567508	intron (NM_001319679, intron 6 of 6)	Charlie15a|DNA|hAT-Charlie	-6584	NM_012316	23633	Hs.470588	NM_012316	ENSG00000025800	KPNA6	IPOA7|KPNA7	karyopherin subunit alpha 6	protein-coding	2.3606
chr19	28959454	28959954	intron (NR_110759, intron 5 of 9)	intron (NR_110759, intron 5 of 9)	-137891	NR_135636	102724908		NR_135636	ENSG00000266976	LOC102724908	-	uncharacterized LOC102724908	ncRNA	3.90204
chr17	79268888	79269649	promoter-TSS (NM_138570)	promoter-TSS (NM_138570)	-130	NM_138570	124565	Hs.352240	NM_138570	ENSG00000157637	SLC38A10	PP1744	solute carrier family 38 member 10	protein-coding	2.48587
chr16	11713009	11713509	Intergenic	Intergenic	-31937	NR_024320	9516	Hs.459940	NM_004862	ENSG00000189067	LITAF	PIG7|SIMPLE|TP53I7	lipopolysaccharide induced TNF factor	protein-coding	4.25002
chr3	8618549	8619445	Intergenic	Intergenic	5529	NR_024065	29931	Hs.433151	NM_013343		LINC00312	ERR-10|ERR10|LMCD1DN|LOH3CR2A|NAG-7|NAG7|NCRNA00312	long intergenic non-protein coding RNA 312	ncRNA	5.50315
chrX	31245249	31245749	intron (NM_004023, intron 20 of 30)	intron (NM_004023, intron 20 of 30)	39525	NM_004015	1756	Hs.495912	NM_000109	ENSG00000198947	DMD	BMD|CMD3B|DXS142|DXS164|DXS206|DXS230|DXS239|DXS268|DXS269|DXS270|DXS272|MRX85	dystrophin	protein-coding	4.05922
chr5	132561818	132562318	intron (NM_015082, intron 8 of 15)	intron (NM_015082, intron 8 of 15)	174406	NM_002154	3308	Hs.90093	NM_002154	ENSG00000170606	HSPA4	APG-2|HEL-S-5a|HS24/P52|HSPH2|RY|hsp70|hsp70RY	heat shock protein family A (Hsp70) member 4	protein-coding	4.32171
chr15	74735041	74735929	Intergenic	Intergenic	-9185	NM_001146029	8482	Hs.24640	NM_003612	ENSG00000138623	SEMA7A	CD108|CDw108|H-SEMA-K1|H-Sema-L|JMH|SEMAK1|SEMAL	semaphorin 7A (John Milton Hagen blood group)	protein-coding	4.1077
chr17	73322243	73322743	intron (NM_002086, intron 3 of 5)	intron (NM_002086, intron 3 of 5)	-36963	NM_001126121	60386	Hs.514470	NM_021734	ENSG00000125454	SLC25A19	DNC|MCPHA|MUP1|THMD3|THMD4|TPC	solute carrier family 25 member 19	protein-coding	4.91314
chr15	74033757	74034257	intron (NM_001303254, intron 2 of 2)	intron (NM_001303254, intron 2 of 2)	9809	NM_001039614	388135	Hs.40794	NM_001039614	ENSG00000205363	C15orf59	INSYN1	chromosome 15 open reading frame 59	protein-coding	3.06264
chr17	72454892	72455392	Intergenic	MLT2A2|LTR|ERVL	-7370	NM_001330456	11314	Hs.9688	NM_007261	ENSG00000167851	CD300A	CLM-8|CMRF-35-H9|CMRF-35H|CMRF35-H|CMRF35-H9|CMRF35H|CMRF35H9|IGSF12|IRC1|IRC1/IRC2|IRC2|IRp60	CD300a molecule	protein-coding	4.60471
chr15	102038213	102038713	Intergenic	LTR33A_|LTR|ERVL	-8276	NM_138322	5046	Hs.498494	NM_002570	ENSG00000140479	PCSK6	PACE4|SPC4	proprotein convertase subtilisin/kexin type 6	protein-coding	3.2734
chr9	112802943	112803664	intron (NM_147150, intron 7 of 9)	intron (NM_147150, intron 7 of 9)	-7574	NM_001004065	11217	Hs.591908	NM_001004065	ENSG00000241978	AKAP2	AKAP-2|AKAPKL|MISP2|PRKA2	A-kinase anchoring protein 2	protein-coding	3.32078
chr3	66024289	66025672	promoter-TSS (NM_004742)	promoter-TSS (NM_004742)	-472	NM_001033057	9223	Hs.476636	NM_004742	ENSG00000151276	MAGI1	AIP-3|AIP3|BAIAP1|BAP-1|BAP1|MAGI-1|Magi1d|TNRC19|WWP3	membrane associated guanylate kinase, WW and PDZ domain containing 1	protein-coding	2.32776
chr2	74946158	74946658	Intergenic	Intergenic	65053	NR_073398	10505	Hs.25887	NM_004263	ENSG00000135622	SEMA4F	M-SEMA|PRO2353|S4F|SEMAM|SEMAW|m-Sema-M	ssemaphorin 4F	protein-coding	3.27497
chr5	131337277	131337777	intron (NM_001205250, intron 1 of 20)	intron (NM_001205250, intron 1 of 20)	9828	NM_001205247	23305	Hs.14945	NM_015256	ENSG00000164398	ACSL6	ACS2|FACL6|LACS 6|LACS2|LACS5	acyl-CoA synthetase long-chain family member 6	protein-coding	3.52066
chr1	153671533	153672033	Intergenic	Intergenic	-9514	NR_107050	102466879		NR_107050	ENSG00000274940	MIR8083	hsa-mir-8083	microRNA 8083	ncRNA	2.46091
chr8	125240305	125240805	intron (NR_125420, intron 1 of 2)	intron (NR_125420, intron 1 of 2)	19084	NR_125420	101927588	Hs.617072	NR_125420	ENSG00000214803	LOC101927588	-	uncharacterized LOC101927588	ncRNA	5.85957
chr17	36620935	36621959	intron (NM_001199417, intron 6 of 23)	intron (NM_001199417, intron 6 of 23)	36727	NM_001199417	57636	Hs.374446	NM_020876	ENSG00000275832	ARHGAP23	-	Rho GTPase activating protein 23	protein-coding	2.42705
chr5	33354443	33355289	Intergenic	Intergenic	-85936	NM_001258437	6897	Hs.481860	NM_152295	ENSG00000113407	TARS	ThrRS	threonyl-tRNA synthetase	protein-coding	2.7003
chr3	16171427	16171927	Intergenic	Intergenic	-44152	NM_001319051	117248	Hs.411308	NM_054110	ENSG00000131386	GALNT15	GALNACT15|GALNT13|GALNT7|GALNTL2|PIH5|pp-GalNAc-T15	polypeptide N-acetylgalactosaminyltransferase 15	protein-coding	5.1107
chr4	40047881	40048381	intron (NR_027277, intron 1 of 2)	intron (NR_027277, intron 1 of 2)	-10393	NM_018177	55728	Hs.391463	NM_018177	ENSG00000078177	N4BP2	B3BP	NEDD4 binding protein 2	protein-coding	2.95192
chr6	135174335	135174835	Intergenic	Intergenic	96675	NM_170771	64577	Hs.486520	NM_022568	ENSG00000118514	ALDH8A1	ALDH12|DJ352A20.2	aldehyde dehydrogenase 8 family member A1	protein-coding	2.4197
chr1	44487589	44488089	intron (NM_001024845, intron 2 of 13)	intron (NM_001024845, intron 2 of 13)	-4827	NM_001328628	6536	Hs.442590	NM_006934	ENSG00000196517	SLC6A9	GLYT1	solute carrier family 6 member 9	protein-coding	5.64563
chr6	168183245	168183745	Intergenic	MLT2D|LTR|ERVL	14044	NR_026773	26238	Hs.520583	NM_014356	ENSG00000146521	LINC01558	C6orf123|HGC6.2|LINC01557|dJ431P23.4	long intergenic non-protein coding RNA 1558	ncRNA	4.37314
chr6	12343521	12344389	Intergenic	Intergenic	53426	NM_001955	1906	Hs.511899	NM_001955	ENSG00000078401	EDN1	ARCND3|ET1|HDLCQ7|PPET1|QME	endothelin 1	protein-coding	3.74072
chr9	33159151	33159651	intron (NM_001497, intron 1 of 5)	intron (NM_001497, intron 1 of 5)	-7545	NR_108110	101929639	Hs.545818	NR_108108	ENSG00000233554	B4GALT1-AS1	-	B4GALT1 antisense RNA 1	ncRNA	2.49881
chrX	64742659	64743159	intron (NM_001170649, intron 10 of 12)	intron (NM_001170649, intron 10 of 12)	11777	NM_001170649	81887	Hs.522675	NM_031206	ENSG00000001497	LAS1L	Las1-like|WTS|dJ475B7.2	LAS1 like, ribosome biogenesis factor	protein-coding	2.79378
[truncated: 1,286 more rows]

## Sheet: S8C Het1A-HNF4A 2d 5x closed
Chr	Start	End	Annotation	Detailed Annotation	Distance to TSS	Nearest PromoterID	Entrez ID	Nearest Unigene	Nearest Refseq	Nearest Ensembl	Gene Name	Gene Alias	Gene Description	Gene Type	Log2(Het1a-HNF4A 2d/Het1a +dox)
[truncated: 967 more rows]

[truncated: 3 more sheets: S8D GATA6 Top 50,000 regions, S8E Het1A-GATA6 2d 5x open, S8F Het1A-GATA6 2d 5x closed]
